# Supplementary material for: A Core Transcription Regulatory Circuitry Defining Microglia Cell Identity Inferred from the Reanalysis of Multiple Human Microglia Differentiation Protocols
Source: Brain Sci. 2021 Oct 11;11(10):1338. doi: 10.3390/brainsci11101338 (PMC8533937; doi:10.3390/brainsci11101338)
Supplement: Supplementary file 1 [file brainsci-11-01338-s001.zip]

Archive with 5 entries (5 files):
- Supplementary_figures_Mendoza.pdf
- Supplementary_Table2_log2fold-Change.xlsx
- Supplementary_table3_Microglia-Spec_Genes.xlsx
- Supplementary_Table4_MRI_per_protocol.xlsx
- Supplementary_Table_1_Datasets.xlsx
