# Supplementary material for: A Core Transcription Regulatory Circuitry Defining Microglia Cell Identity Inferred from the Reanalysis of Multiple Human Microglia Differentiation Protocols
Source: Brain Sci. 2021 Oct 11;11(10):1338. doi: 10.3390/brainsci11101338 (PMC8533937; doi:10.3390/brainsci11101338)
Supplement: Supplementary file 1 [file brainsci-11-01338-s001.zip › Supplementary_figures_Mendoza.pdf]

# **A core transcription regulatory circuitry defining microglia cell identity inferred from the reanalysis of multiple microglia differentiation protocols**

**Antoine Aubert<sup>1</sup>, François Stüder<sup>1</sup>, Bruno Maria Colombo<sup>1</sup>, and Marco Antonio Mendoza-Parra<sup>1,\*</sup>**

<sup>1</sup> UMR 8030 Génomique Métabolique, Genoscope, Institut François Jacob, CEA, CNRS, University of Evry-val-d'Essonne, University Paris-Saclay, 91057 Évry, France.

\*Corresponding author: Marco Antonio Mendoza-Parra

E-mail: [mmendoza@genoscope.cns.fr](mailto:mmendoza@genoscope.cns.fr) / Phone: +33 (0) 1 60 76 42 92

## **Table of contents**

**Supplementary Figure S1 : Step by Step visualization of RNA-seq readouts on QC Genomics platform.**

**Supplementary Figure S2: Volcano plots revealing the differentially expressed genes (DEGs) in iMGL datasets generated by the various differentiation protocols.**

**Supplementary Figure S3. Master regulatory Transcription factors predicted by TETRAMER for each of the differential expression data associated to each of the iMGL differentiation protocols.**

**Supplementary Table S1 : Public Datasets and their associated identifiers (GSM) used in this comparative study (Excel file).**

**Supplementary Table S2: Differential gene expression readouts (DeSeq2) (Excel file).**

**Supplementary Table S3: Microglia-specific up-regulated genes identified in this study (Excel file).**

**Supplementary Table S4: Master regulatory indexes per TF assessed by TETRAMER (Excel file).**

<http://ngs-qc.org/qcgenomics/>

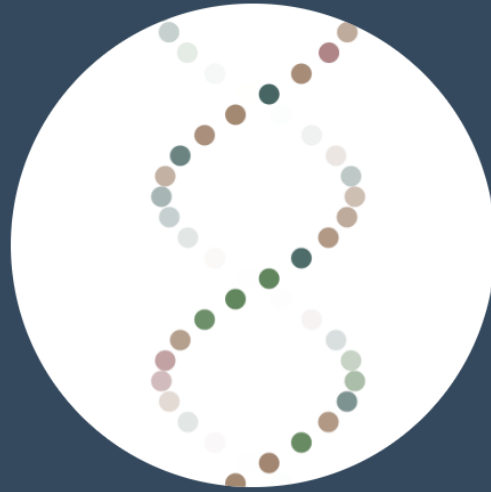

## QC Genomics

QC Genomics is a public resource providing a central access to the largest collection of genomic data. It allows scientists to browse, visualize, compare, and analyze thousands of publicly available genomic data sets.

Search QC Genomics

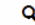

*Not sure what to search? Try [MCF-7 FSR1](#), [mESC H3K27me3](#), or [GM12878 Hi-C](#)*

► Start the tour

1

0

0

« Start the tour » allows to have an overview of the functionalities available on qcGenomics

1

NAVi

Exploration and visualization of thousands of NGS experiments.

QC Comparator

A fast, integrative and exhaustive NGS datasets comparison tool.

QC ChromStater

Discovering de novo re-occurring combinatorial and spatial patterns of marks.

NGS-QC Generator

Galaxy tool for the quality control of NGS data.

NGS-QC database

Database of quality control descriptors for ChIP-seq and related assays.

LOGIQA

Long-range genome interactions (e.g. Hi-C) quality assessment.

TETRAMER

Reconstruction of temporal transcriptional gene regulatory networks.

1

On the Qc genomics site, first select the Nuclear Acid Viewer (NAVi) tool, or use the query panel available on the front page.

**Supplementary Figure S1. Step by Step visualization of RNA-seq readouts on QC Genomics platform.** The QC Genomics platform is mounted over the NGS-QC Generator database, hosting > 90 000 public datasets, covering ChIP-sequencing and enrichment related assays, including RNA-sequencing. QC Genomics, allows to retrieve datasets by the use of queries targeting the samples identifiers (e.g. GSM), cell/tissue types, target molecules (e.g. RNAseq, H3K4me3, etc), authors, etc. Retrieved datasets can be visualized on dedicated a genome browser to evaluate enrichment levels at defined genes or genomic coordinates, but also via multi profile comparison strategies (Global profile comparisons with QC Comparator or local combinatorial assays with QC ChromStater).

3

Genomic Acid Viewer 0.9.0

Experiments 52

Genome browser

User data 0

Documentation

2

### Text search

Search thousands of experiments by organism, technique, biological source, author...

Search

- Search queries are case insensitive.
- Enclose a group of words in double quotes to search for an exact phrase (e.g. "embryonic stem cell").
- Use the plus sign (+) to combine several independent searches (e.g. Human H3K4me3 MCF-7 + Human Cebpb K-562).
- Filter by quality (e.g. AAA) or by a range of quality (e.g. "A-C" to retrieve datasets having a quality between AAA and CCC).

Results

- Click on a row to select/unselect the experiment. Selected experiments are highlighted in green.
- Click the 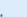 button to display more information.

3

microglia + IMGL

Examples: MCF-7 ESRT1, mESC H3K27me3, GM12878 Hi-C

Extended search 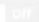

Displaying results 1 - 15 of 52 

Charts 

Analyze with

| Accession                                                                                    | homo sapiens | Biological source | Experiment | Mapped Reads | QC stamp | Cis PETs | 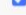 |
|----------------------------------------------------------------------------------------------|--------------|-------------------|------------|--------------|----------|----------|-------------------------------------------------------------------------------------|
| GSM2631907 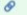 | Homo sapiens | microglia         | RNA-seq    | 31,971,704   | AAA      |          | 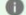 |
| GSM2631906 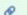 | Homo sapiens | microglia         | RNA-seq    | 21,826,507   | BAA      |          | 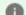 |
| GSM2631905 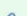 | Homo sapiens | microglia         | RNA-seq    | 27,272,444   | AAA      |          | 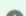 |
| GSM2631904 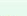 | Homo sapiens | microglia         | RNA-seq    | 20,217,630   | BAA      |          | 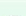 |
| GSM2631903 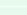 | Homo sapiens | microglia         | RNA-seq    | 9,082,477    | BBB      |          | 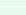 |
| GSM2631902 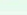 | Homo sapiens | microglia         | RNA-seq    | 20,828,360   | BBA      |          | 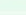 |
| GSM2631901 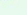 | Homo sapiens | microglia         | RNA-seq    | 15,347,269   | BBB      |          | 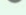 |

Comments & feedback

Built with 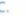 @ IGBMC.

© 2021 Gronemeyer lab.

4

2

Data sets can be selected using broad terms ex : microglia on the upper reasearch bar,

The research can be refined using specific terms in each sub section:  
-Accession : GEO accession number  
-Organism : Scientific name of the organism studied(Homo sapiens or mus musmuculus )  
-Biological source : The type of cell ( ex: «iMGL» or « microglia »)  
-Experiemnt the type of sequencing Data (RNA-seq,ATAC-seq,...)

3

Datasets can be selected by performing a left click. The number of selected datasets is shown in the « experiment » Tab. Then, they can be visualized within the Genome browser tool.

4

For each dataset, information like their total number of mapped reads and a quality score (going from DDD to AAA, from worst to the best) is available. Further information is also available on a right click on the mouse.

**Supplementary Figure S1. Step by Step visualization of RNA-seq readouts on QC Genomics platform.** The QC Genomics platform is mounted over the NGS-QC Generator database, hosting > 90 000 public datasets, covering ChIP-sequencing and enrichment related assays, including RNA-sequencing. QC Genomics, allows to retrieve datasets by the use of queries targeting the samples identifiers (e.g. GSM), cell/tissue types, target molecules (e.g. RNAseq, H3K4me3, etc), authors, etc. Retrieved datasets can be visualized on dedicated a genome browser to evaluate enrichment levels at defined genes or genomic coordinates, but also via multi profile comparison strategies (Global profile comparisons with QC Comparator or local combinatorial assays with QC ChromStater).

- 6

**Supplementary Figure S1. Step by Step visualization of RNA-seq readouts on QC Genomics platform.** The QC Genomics platform is mounted over the NGS-QC Generator database, hosting > 90 000 public datasets, covering ChIP-sequencing and enrichment related assays, including RNA-sequencing. QC Genomics, allows to retrieve datasets by the use of queries targeting the samples identifiers (e.g. GSM), cell/tissue types, target molecules (e.g. RNAseq, H3K4me3, etc), authors, etc. Retrieved datasets can be visualized on dedicated a genome browser to evaluate enrichment levels at defined genes or genomic coordinates, but also via multi profile comparison strategies (Global profile comparisons with QC Comparator or local combinatorial assays with QC ChromStater).

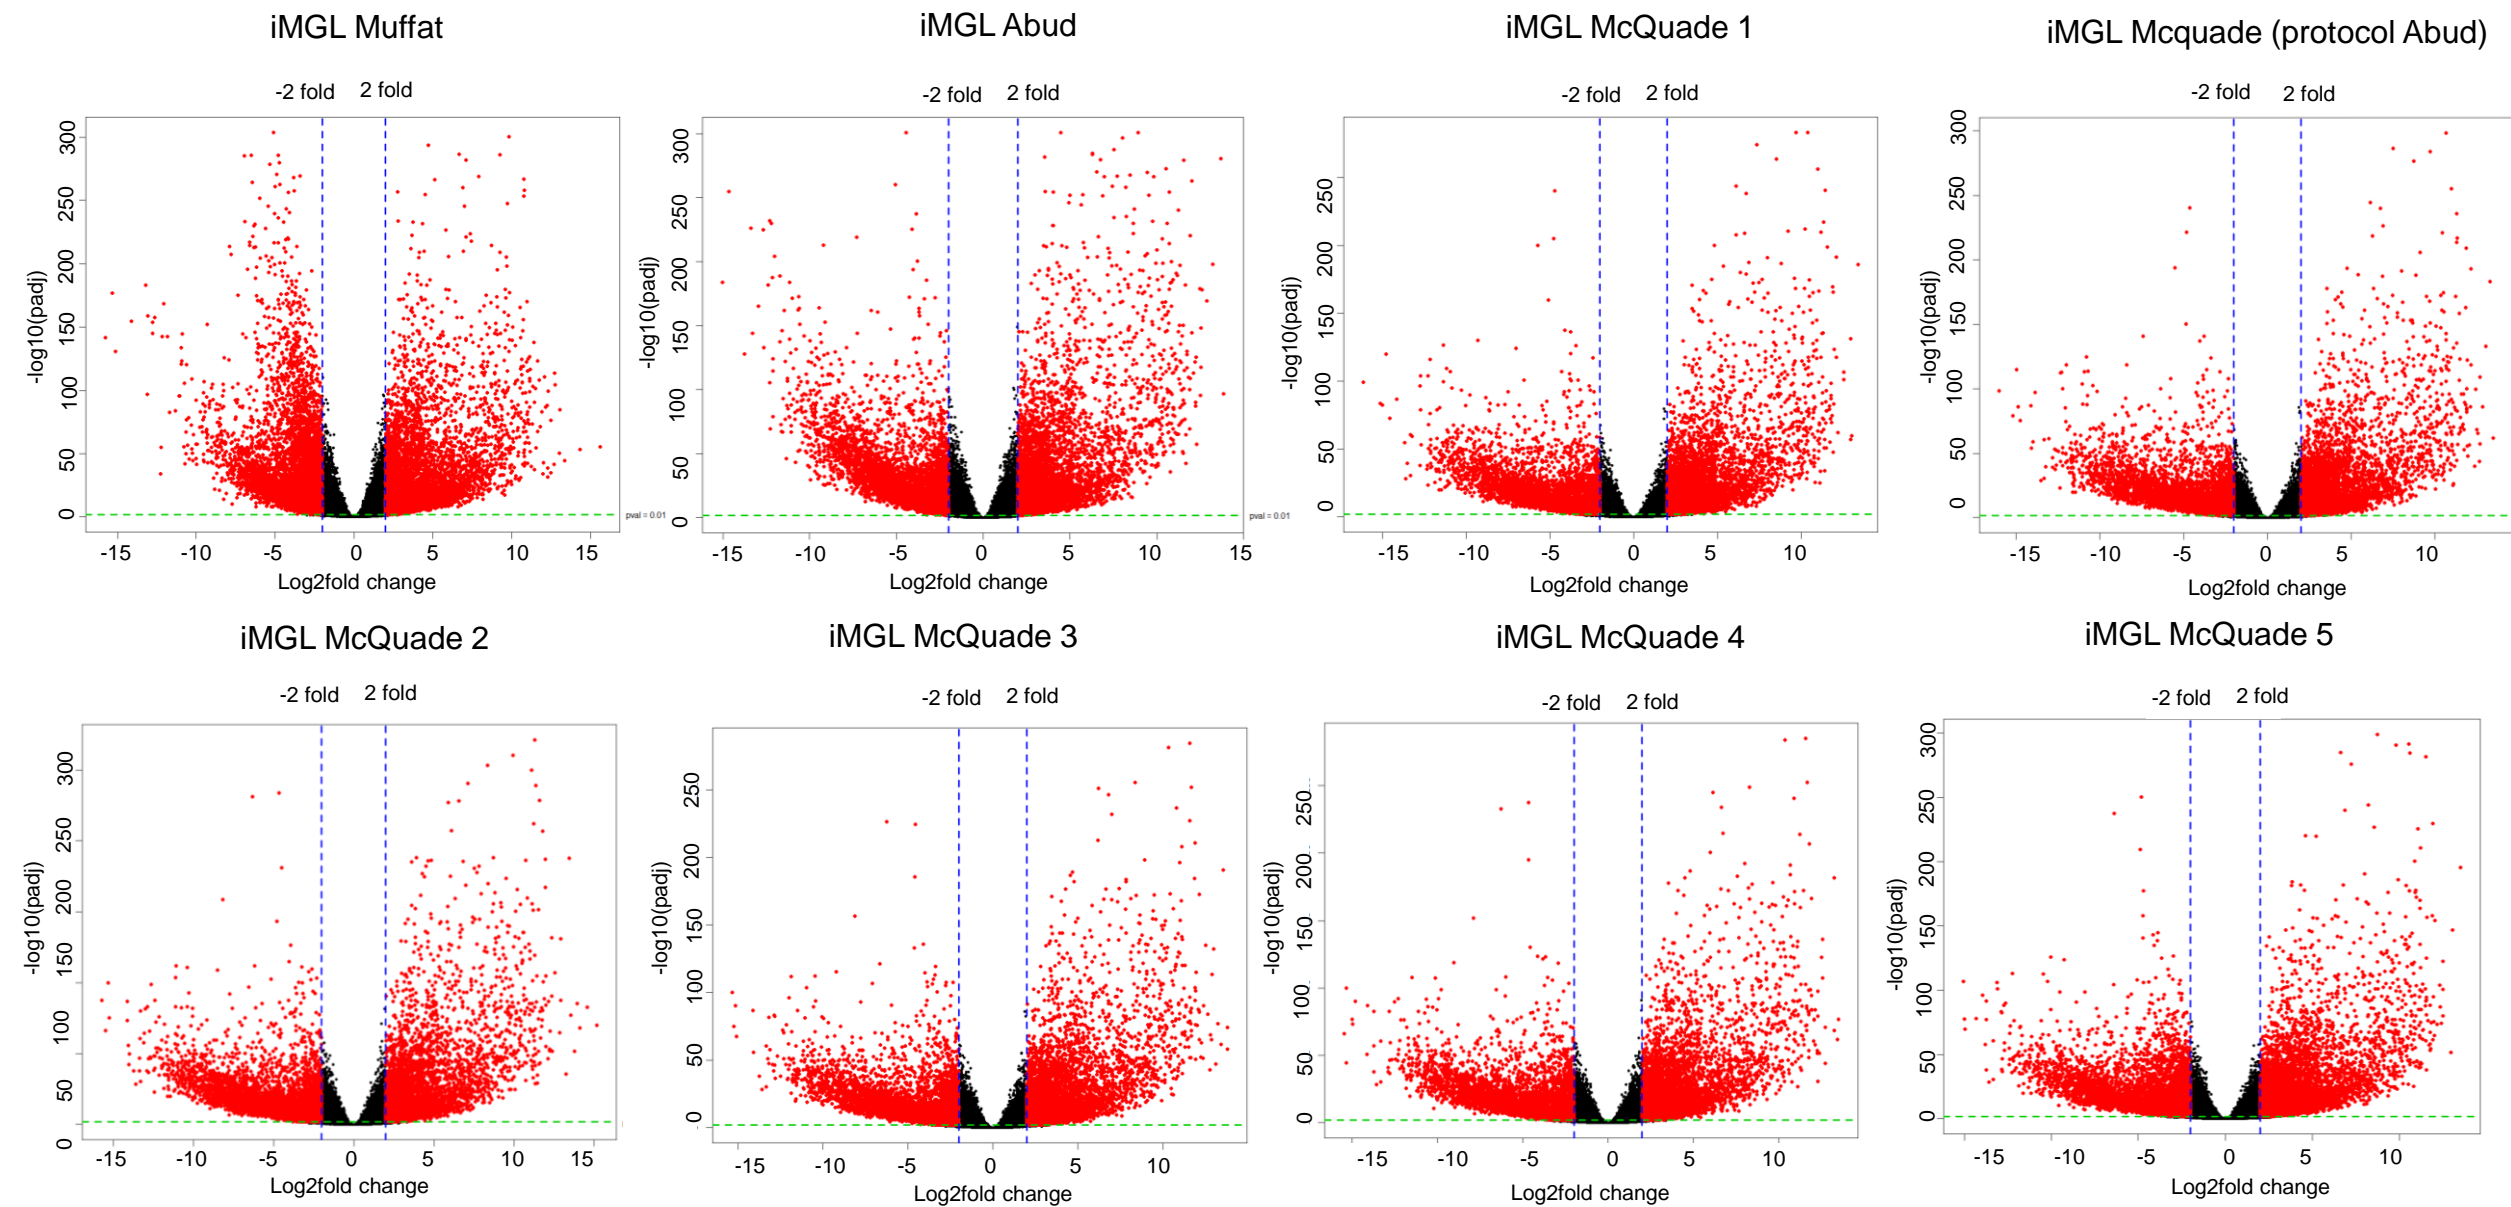

**Supplementary Figure S2: Volcano plots revealing the differentially expressed genes (DEGs) in iMGL datasets generated by the various differentiation protocols.** DEGs, defined by a log2 fold-change expression  $>2$  (dashed vertical blue lines) and an adjusted P-value (padj)  $<0,01$  (dashed horizontal green line), are displayed in red.

iMGL Douvaras 1

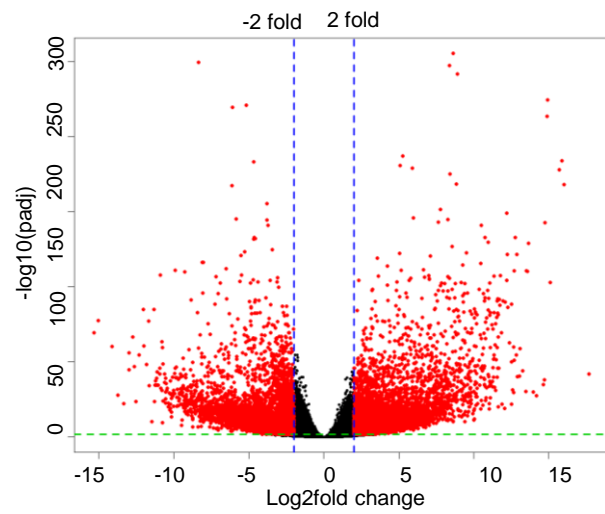

iMGL Douvaras 2

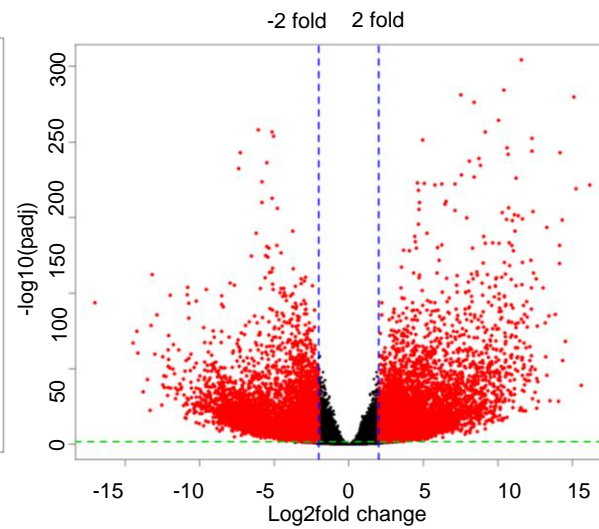

iMGL Douvaras 3

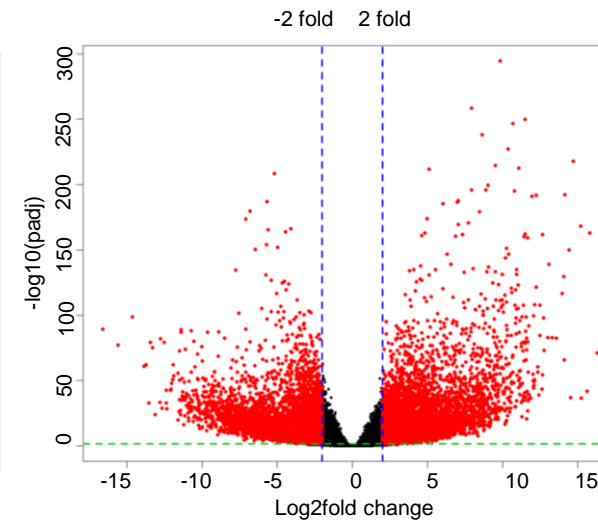

iMGL Chen 1

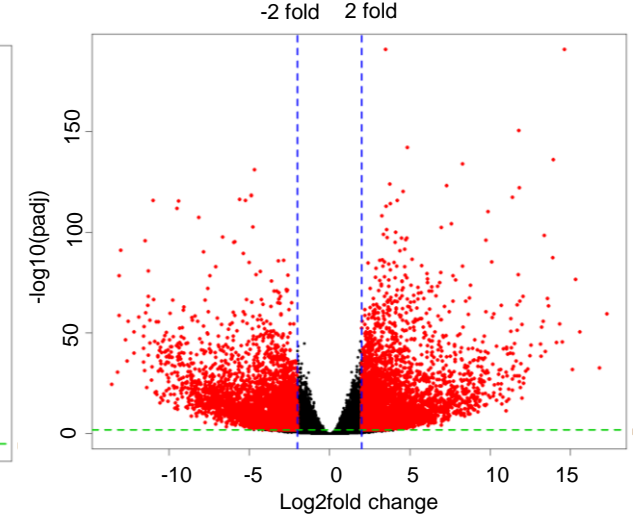

iMGL Chen 2

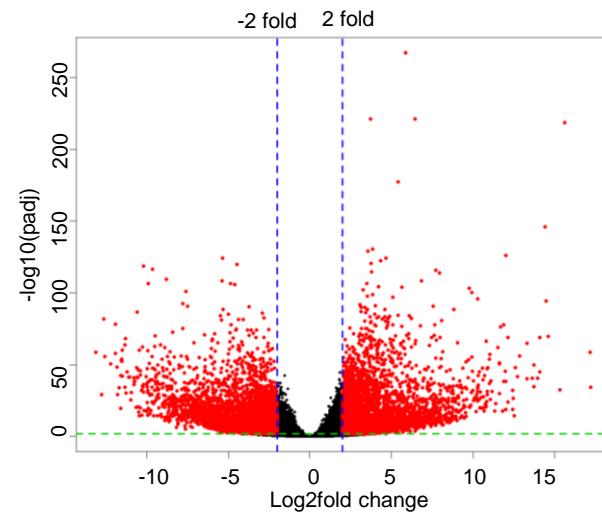

iMGL Trudler

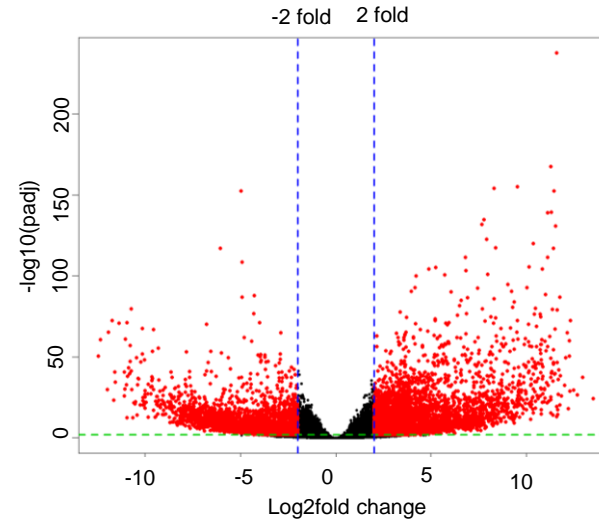

**Supplementary Figure S2: Volcano plots revealing the differentially expressed genes (DEGs) in iMGL datasets generated by the various differentiation protocols.** DEGs, defined by a log2 fold-change expression  $>2$  (dashed vertical blue lines) and an adjustedP-value (padj)  $<0,01$  (dashed horizontal green line), are displayed in red.

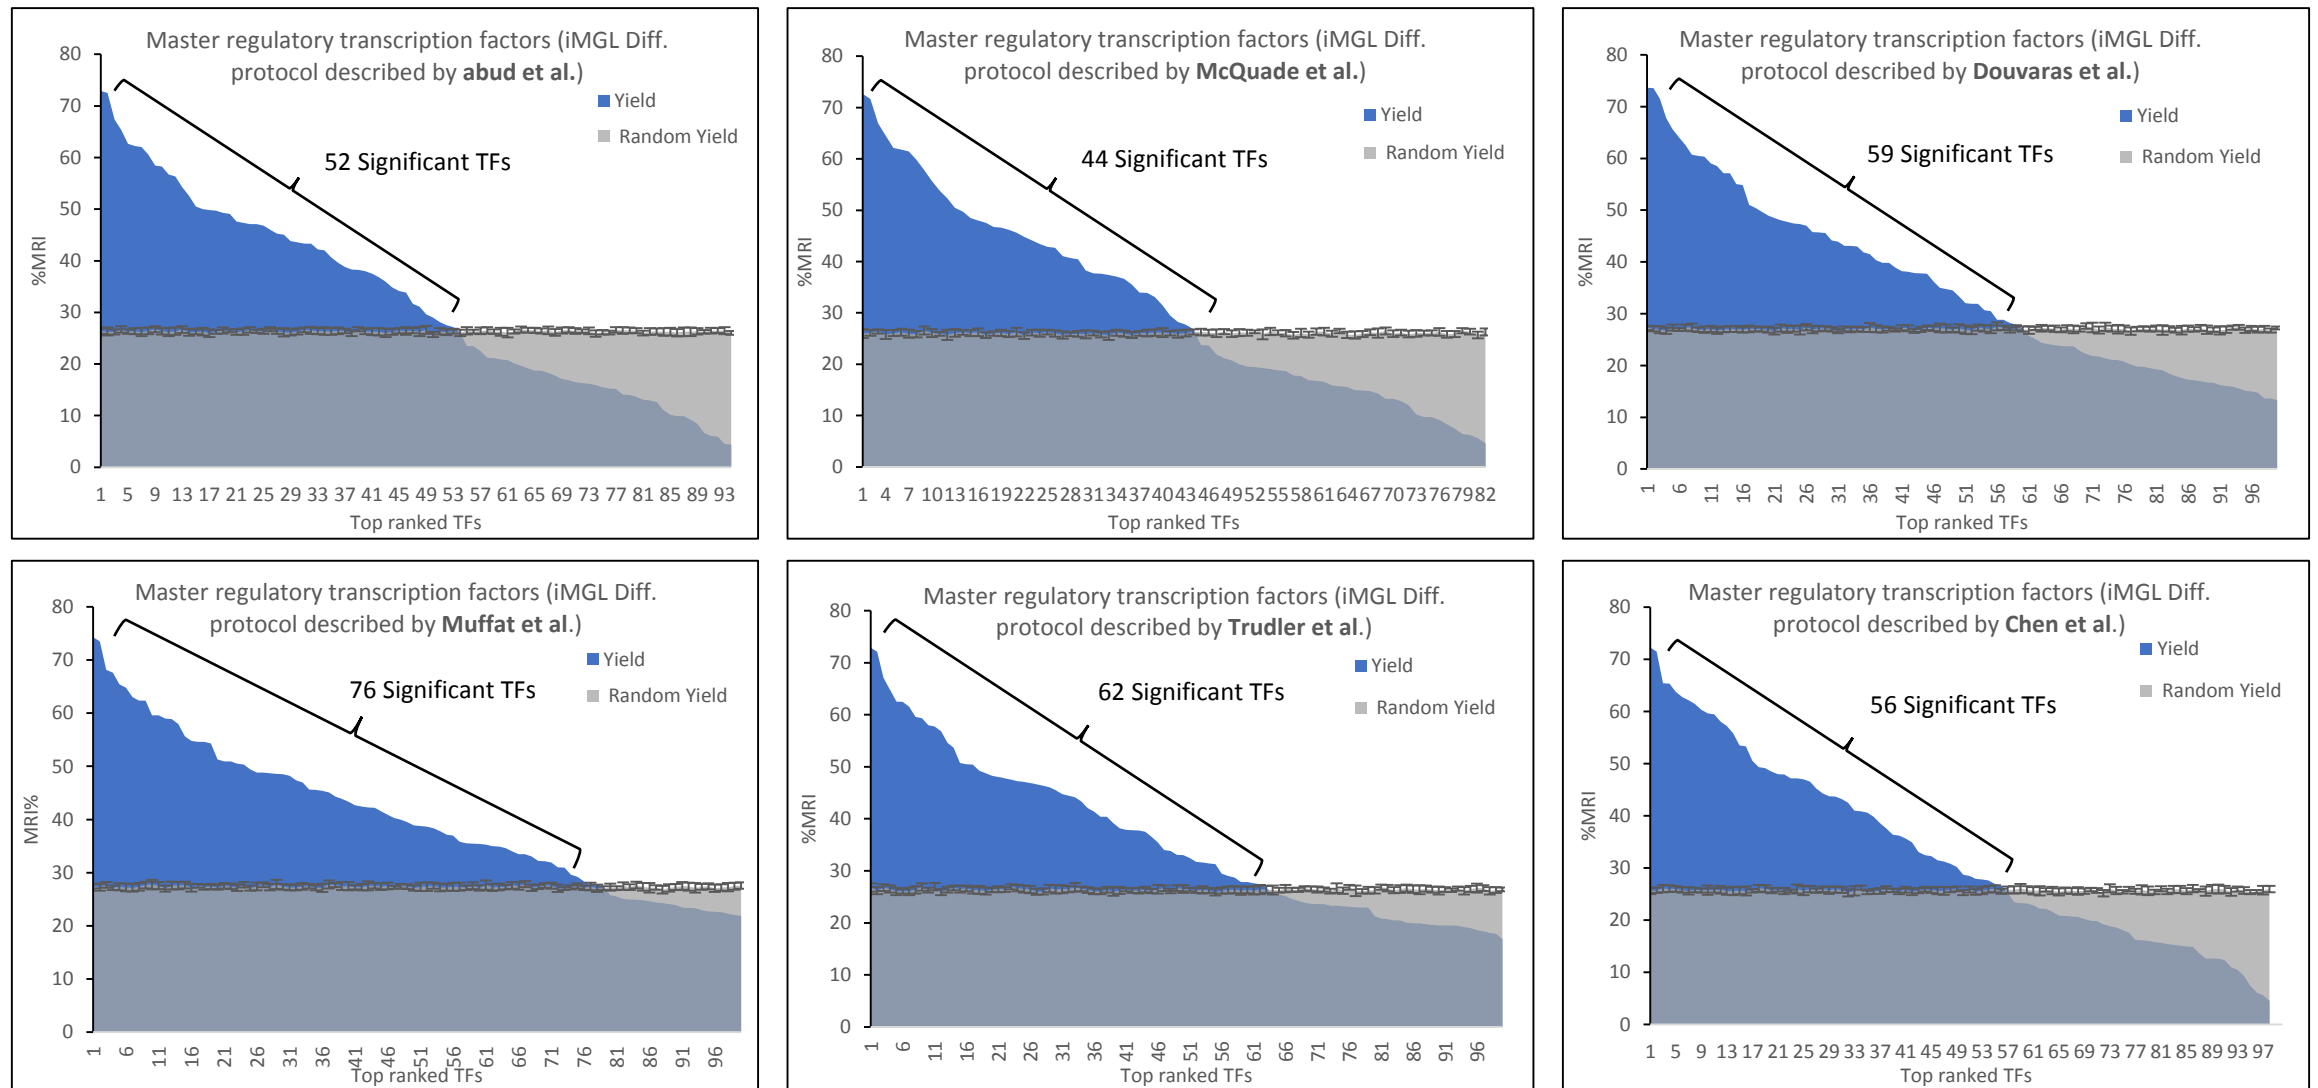

**Supplementary Figure S3. Master regulatory Transcription factors predicted by TETRAMER for each of the differential expression data associated to each of the iMGL differentiation protocols.** TETRAMER (Cholley et al; Nat. Sys. Biol & Appl; 2018) reconstruct a gene regulatory network (GRN) by integrating the differential expression data (iMGL vs iPS) and a collection of TF-target genes (TG) relationships issued from CAGE readouts (Marbach et al; Nat. Methods 2016). Then TETRAMER simulates TF transcription regulation over the whole GRN and evaluates the fraction of downstream TGs under its control, defined as the Master regulatory index (MRI). Each TF is ranked on the basis of their MRI and compared to a similar analysis over 10 randomized GRNs. “Yield” correspond to the MRI and “random yield” to the MRI assessed under the randomized conditions. Error bars over the randomized MRI reflects the fluctuation issued from the 10x randomization assays.
