# Supplementary material for: A Core Transcription Regulatory Circuitry Defining Microglia Cell Identity Inferred from the Reanalysis of Multiple Human Microglia Differentiation Protocols
Source: Brain Sci. 2021 Oct 11;11(10):1338. doi: 10.3390/brainsci11101338 (PMC8533937; doi:10.3390/brainsci11101338)
Supplement: Supplementary file 1 [file brainsci-11-01338-s001.zip › Supplementary_Table2_log2fold-Change.xlsx]

## Sheet: res_data_supplementary
	iHPC_Abud			iHPC_Mcquade_1			iHPC_McQuade_2			iHPC_McQuade_3			iMGL_Abud			iMGL_McQuade_protocol_Abud			iMGL_McQuade_1			iMGL_McQuade_2			iMGL_McQuade_3			iMGL_McQuade_4			iMGL_McQuade_5			iMGL_Muffat			iMGL_Douvaras_1			iMGL_Douvaras_2			iMGL_Douvaras_3			iMGL_Chen_1			iMGL_Chen_2
gene symbol	log2FoldChange	pvalue	padj	log2FoldChange	pvalue	padj	log2FoldChange	pvalue	padj	log2FoldChange	pvalue	padj	log2FoldChange	pvalue	padj	log2FoldChange	pvalue	padj	log2FoldChange	pvalue	padj	log2FoldChange	pvalue	padj	log2FoldChange	pvalue	padj	log2FoldChange	pvalue	padj	log2FoldChange	pvalue	padj	log2FoldChange	pvalue	padj	log2FoldChange	pvalue	padj	log2FoldChange	pvalue	padj	log2FoldChange	pvalue	padj	log2FoldChange	pvalue	padj	log2FoldChange
DDX11L1	0.443946911094027	0.437809503516479	0.661440417784162	1.5632490575046	0.00375140982252491	0.00936942107316179	2.68186861688982	2.46276266235343e-07	1.28958563220916e-06	1.09957395923232	0.0428433503438765	0.0889926737454628	1.82372796354638	3.78409939530338e-05	0.000101928374495874	0.729319737155195	0.183834737574032	0.293041513236296	0.683380478696356	0.224866281379234	0.351339038409485	2.07096428675888	0.000179642071491278	0.000524716256521199	2.09062638675334	0.00015240434561253	0.000431472824315199	2.19770503520483	5.01816543767225e-05	0.000155224334214736	0.759728890090761	0.186252893153337	0.300540769914817	0.373698364696495	0.454147865675824	0.621407381126541	1.13762186176036	0.0654284035452913	0.122794706674401	1.24090217788407	0.0504554120775534	0.0921696335983331	0.839752030610631	0.202170066285105	0.320829044235286	2.09654850565459	0.018511576093776	0.0438113793247006	-0.0664741834346603
WASH7P	0.448761430676436	0.0225873580395229	0.0569318089596577	0.355096294210071	0.071191564743543	0.134816378066842	-0.0123481852941371	0.949945351394334	0.999999999999893	-0.214097691038896	0.278483544310818	0.448751940069529	1.0523454178534	1.03856409486928e-11	4.54725388230216e-11	0.787147472662668	5.40909423000059e-05	0.000162598878441349	0.761844578277348	0.000100765791611603	0.000295898964221945	0.456796647226903	0.0202984328409739	0.0426707266879505	0.548174064405983	0.00535877114443376	0.0121183275813873	0.385326560089649	0.0499575907921914	0.0940140518804329	0.68945385543937	0.000443631852981531	0.00115904961513776	-3.15769422000983	7.48043604909605e-65	2.04564883446284e-63	-1.06502022942403	3.02574232025537e-06	1.22809541233895e-05	-0.515844045458532	0.0250934375685146	0.0489587233943858	-0.614762024540774	0.00798590803122315	0.0175144752691893	0.76274828897558	0.00129787260995767	0.00389501959825734	0.630185539870396
MIR6859-1	0.426413578637139	0.329565445554945	0.536465176321683	-0.246962964751602	0.576490641063375	0.781326258342767	0.0192828128829168	0.964852347896728	0.999999999999893	-1.1714973330787	0.00933622124428446	0.022638780402515	1.90484207744079	2.38285460983334e-08	8.32058075939477e-08	1.38496563647309	0.00121399189879543	0.00302921851441407	1.40339300777517	0.0011322374881142	0.00287128304128694	1.19816496001247	0.00593843837089505	0.0138252035477576	0.927807374124486	0.034337538335577	0.0667710480140644	0.67850835021098	0.121777951314874	0.208434276654362	1.14186160232718	0.00845465234955471	0.0182014426989386	-4.88322965548533	1.95914644896816e-20	1.27290482430329e-19	-1.4237780184149	0.00715727612349601	0.0167091088112187	-0.445432548877204	0.395938497636159	0.553093296179117	-1.36657049885378	0.0157256052072509	0.0326904461841459	0.506196719647667	0.349748086244299	0.545411189789771	0.929893815640156
MIR1302-2HG	0.00624310872179906	0.989119062512295	0.999999999999893	-0.400829163678904	0.398922398815173	0.587465696477301	-0.0834634441765936	0.855056306699509	0.999999999999893	-0.791076457241405	0.100754856670829	0.189002779762593	1.19173190446157	0.000634837099525145	0.00150721298717701	1.46205381119612	0.000350391866309698	0.000945315434969271	0.791087331095646	0.067648047053086	0.122757211242785	1.2839587864578	0.00428445699393969	0.0102286071546661	0.778456513292611	0.0968260989191383	0.169631511131674	1.0116098687538	0.0241599769141354	0.0487565612634261	0.798967055644474	0.0744614003909431	0.133295881915147	-2.77851550032384	1.34723713297438e-07	4.2520204297763e-07	-2.12784072183159	0.00140837109156203	0.00376482435887524	-2.93411696007273	5.89187954218409e-05	0.000171896556613285	-2.90641381270143	0.000187851426822004	0.000527923067140119	-0.107175713596369	0.860696630520409	0.999999999999823	-0.517179162838515
FAM138A	-1.04959909849704	0.272799045285921	0.462889416095028	-1.25939464813216	0.199897584495946	0.332221736233849	-1.25939464813216	0.199897584495947	0.342929442485383	-1.13611488501247	0.235787416632881	0.390180100738312	-0.984931599364313	0.172846262436598	0.278909862122296	-1.25939464813216	0.199897584495946	0.315074807912102	-1.18966937655593	0.214780771441526	0.337752032019145	-1.25939464813216	0.199897584495946	0.328185102322238	-1.25939464813216	0.199897584495946	0.31874703614755	-1.25939464813216	0.199897584495947	0.320293144697772	-1.25939464813216	0.199897584495946	0.319467617775288	-1.25939464813589	0.116148211716938	0.189024496485091	-1.14492008250761	0.29385235608103	0.448469080189238	0.0299673789832904	0.97550383618646	0.999999999999913	-1.03005804369156	0.318601302619387	0.471833531245774	-0.523904308378907	0.669267034209463	0.875665925129557	-0.268707550331016
AL627309.1	1.72880301152199	2.03525388447491e-07	1.29550313624769e-06	2.76478530268514	5.0377365090134e-19	5.82294929869785e-18	2.34334624484997	8.72041049967204e-14	8.83203324985009e-13	1.74082611640392	7.75902154495836e-08	3.95831205646773e-07	3.17400462727243	8.53650488856684e-31	9.10689277176972e-30	3.02638168349003	4.62034425823049e-24	5.9951693348547e-23	3.14119689850617	6.02729225652245e-25	8.57776429316742e-24	1.56553703991389	3.89673719941885e-05	0.000123596399283646	2.82716242235561	7.5069820906001e-18	6.47329888670458e-17	2.83567364956393	1.01437596111429e-18	9.70943815099404e-18	2.50317460217416	1.40678953176294e-14	9.09524592621875e-14	0.503275232412527	0.152030488955509	0.240857612100874	0.629617960982946	0.131305751222348	0.22581022330754	3.98974549836061	1.92485948231429e-33	4.40455141726384e-32	3.6172731086822	7.36681667735489e-26	1.17994391587834e-24	-0.020889981168814	0.951248713597968	0.999999999999823	0.986651559845314
AL627309.3	1.67041832374804	0.000148107990877221	0.000605729624681151	2.6558575277252	1.03209369089e-10	6.21814274622269e-10	2.06239711785604	1.13063137641721e-06	5.4536540720739e-06	1.84730052368677	1.4203253413605e-05	5.47133011999288e-05	3.35836771556437	2.96751746666169e-20	2.03384215520331e-19	3.18638128915119	3.68957090217677e-16	2.8684605151237e-15	3.29376338620449	1.18137938476258e-16	9.86481356449513e-16	0.918902031054235	0.0927312926862311	0.167984526873799	2.53976070291478	1.58176721391066e-08	6.77652257241956e-08	3.03915719980391	5.03058623641756e-13	3.23614056992586e-12	2.47569164898997	9.94756098413126e-09	4.15969370232868e-08	0.28741299344602	0.535974823459156	0.709098009689203	0.603909367165356	0.270175335019091	0.418078768595951	3.75656954743097	8.91049724448464e-18	7.9362277057301e-17	3.46855899951734	3.48793259079028e-14	2.47588229402184e-13	0.0359945774636817	0.949043904638122	0.999999999999823	2.19355045062112
CICP27	0.517436827605309	0.236020109035523	0.413396191572212	1.90316141303242	3.54459686632908e-06	1.35031331087523e-05	1.30188775392122	0.00174832997247648	0.0051353728519978	1.04824299406793	0.0121298777442265	0.0286881423811407	1.77074699720136	1.82910691313286e-07	5.99264904553475e-07	2.08688674551646	2.16041199610532e-07	8.46747767684352e-07	2.17383584723337	1.03747090291054e-07	4.25337570866104e-07	1.42879513307174	0.00111673187613889	0.00292535855325823	1.39409442296466	0.00149725656469205	0.00369712014356291	1.73859000766563	4.06059046610771e-05	0.00012680821885993	1.55997355974682	0.000232369645915832	0.000628869692396023	-2.25786901683012	3.82064165424826e-06	1.07643645539084e-05	-0.0707444795858823	0.890845884436303	0.999999999999876	0.672496554345859	0.190323285583297	0.298272220124686	0.411494083696158	0.448175128894396	0.625801609802845	0.576527797508861	0.220422508829983	0.376362646137934	0.0581998350557804
AL627309.6	0.0703288908092832	0.885161535835496	0.999999999999893	1.45671305963077	0.00260282510318668	0.0066918087052584	0.733458633782431	0.129870461160859	0.238824735230096	1.02671614149007	0.033903825673513	0.0723214639724236	1.42134439254627	0.00019662481175507	0.000492791245497609	1.59409486361291	0.000960354112375524	0.00243144611524868	1.84017464147389	0.000140340956697841	0.000404017919320638	1.16136430798445	0.0165608799021078	0.0353998870306964	0.849013606545456	0.0803676156628853	0.143723490706635	1.46390025626943	0.00247783474920276	0.00600510389657231	1.56653400039889	0.00120399833312427	0.00295910026258615	-3.66516176476539	1.91338071588553e-16	1.02209766624553e-15	-4.82269927744236	2.23040982473259e-13	1.99966960494612e-12	-3.00240037661582	7.61233378586627e-07	2.76410827034229e-06	-3.09308640647189	6.02402395301075e-07	2.26949459700804e-06	1.36059286901972	0.0181587374657658	0.0430712669681336	0.946395687407711
AL627309.7	0.536911410446234	0.261167461451106	0.447438248098284	1.45843698836811	0.00215199037192818	0.00560360823928955	0.579510697921603	0.223739037292846	0.376554704977453	1.09826885521682	0.0209065846169088	0.0470072612100833	1.42441293596674	0.000148359349396485	0.00037666887585095	1.45366528934624	0.00217170152192616	0.0052155554423659	1.63946006445392	0.000557530155569601	0.00147801864500292	0.695879883686759	0.145691268446098	0.250080683032649	0.368040350359689	0.443462148983594	0.618061649638629	0.655139137328802	0.170206474134171	0.278935720881066	0.922840267291057	0.0529446916484029	0.0979460597027762	-4.31101337671276	5.74907033788886e-20	3.64688647711322e-19	-4.58578927258597	3.61039341403879e-12	2.86736686290432e-11	-4.89196463416687	2.22337556478059e-13	1.43988315246415e-12	-5.10879004164555	1.93937323037539e-13	1.30204283662037e-12	0.515127592924883	0.362286402083065	0.560963804215352	0.753827789556095
AL627309.2	0.251966370916823	0.545375199979372	0.771545023103492	1.20367749329946	0.00248748655548746	0.0064184769375684	0.976584294137422	0.0142734401032534	0.0346050846836458	1.28262695924966	0.00110012665331455	0.00318375271317887	2.02983934911141	1.73832836364353e-10	7.04826595793587e-10	2.09836539099169	4.56066114025366e-08	1.89954246028492e-07	2.10223301462759	6.70466614812956e-08	2.80388013818165e-07	1.07379759162293	0.0106967120267609	0.0237212694663964	0.958665388573365	0.0239756188616522	0.0481520539187018	0.675476773884279	0.110605221620513	0.191564494588731	0.969049814813254	0.0184996714163321	0.0374648164373371	-2.82923736038127	5.87338916048796e-09	2.03574916111465e-08	-1.86824978962505	0.00126277943238078	0.00340728434375904	-1.99614476151909	0.000502242940662767	0.00129217698595618	-3.56964313380454	7.93929738028267e-07	2.94985029951336e-06	-0.375379307725179	0.399630931054763	0.604811171672236	-0.18624547570838
AL627309.5	0.142082789905353	0.686272820631513	0.896674390179814	0.654298801417333	0.0598882957226107	0.115564725107302	0.902688405373297	0.00899079948856008	0.0228271107466333	0.682507620885197	0.0488012097940669	0.0999199454093048	1.46200629027713	9.38237334606464e-08	3.13872085633112e-07	1.10397189776781	0.00131308339084914	0.00326267633375516	1.38054818947652	6.34184613614953e-05	0.000191398878926854	0.0371893852367772	0.917144791594582	0.999999999999901	0.207544713910454	0.559832254622809	0.744776979514395	-0.298687761942067	0.40568529490887	0.57773157297589	0.350394243013447	0.318554284800938	0.475819867799159	-2.61895082307357	2.42926948231531e-14	1.16442156162542e-13	-0.959068159480861	0.019653169752555	0.0417759773057963	1.04666072509778	0.00855177809807791	0.0182259836709375	-0.519488000922726	0.22401627481939	0.349047203435412	0.318919567530747	0.438103241259841	0.649530234687898	0.48717747902758
RNU6-1100P	0.207036443400791	0.801681337510924	0.981469555774506	1.12306959209433e-07	0.999999897551234	0.999999999999901	0.279353719611246	0.73460866715162	0.924834349037634	0.794683848938118	0.307524212190238	0.486648413905993	1.11659620603088	0.0876738218043787	0.151623130090349	1.64867449949582	0.0221304183933441	0.0442782284378224	1.207129546425	0.105116107759614	0.181528024013988	0.445249256114229	0.59786048852232	0.795713369933933	0.471713228446356	0.57617956392763	0.759932823153691	1.12306958408577e-07	0.999999897551235	0.999999999999893	0.579083584264623	0.480870678171461	0.665213335528949	-1.12306989802156e-07	0.999999878780969	0.999999999999938	3.36920790815442e-07	0.999999728946058	0.999999999999876	0.0506865284968462	0.955374607753121	0.999999999999913	3.36920789053557e-07	0.99999972894606	0.999999999999922	1.10177138498927	0.2590841742547	0.430837116780583	0.279268393161106
AL627309.4	0.209359710876505	0.804902071884328	0.982789029120893	0.0950031203731002	0.91215563942496	0.999999999999901	0.309517249578933	0.713822177487665	0.90869718306136	1.68689959302365	0.0265771170727478	0.0582490546037799	1.28019070007033	0.0497357012929841	0.0904519654245127	1.79668393020948	0.0170724505616818	0.0349194778444073	2.19289920662962	0.00359127735041434	0.00840733965404796	1.0589320754274	0.20665189163596	0.337532818547619	0.662916399165324	0.439937713989543	0.614232784433069	0.166253157598899	0.850231301740207	0.991626257146552	0.470805806236776	0.58377597367524	0.772951091437904	0.986214489824269	0.163317186550109	0.256826747500988	0.678181490806245	0.453536423072426	0.637395057383414	0.34807710395936	0.696407713638606	0.87072823631804	-0.156167256137358	0.874980285452581	0.999999999999922	1.99001157562934	0.054381773321642	0.113791000061767	0.591476342266774
DDX11L17	1.4145775936093	0.0628580914623085	0.138528863786744	1.7594473314222	0.0194118420240116	0.0421099167777709	1.95236257496264	0.00890906850919262	0.0226354168012442	0.0917700004257987	0.907669008500331	0.999999999999901	2.35933873312452	0.000108238595992411	0.000278882240121788	0.819392001901798	0.283148130890081	0.424467724542763	1.25052352965381	0.0996862617189275	0.173158702173574	3.22005374702562	1.51777103373959e-05	5.06234146142763e-05	2.32145925570762	0.00239159039739489	0.00572613498523822	2.92411691041293	8.70073691850398e-05	0.000260966861273333	2.34758069930984	0.00179391233004602	0.00430185014581183	1.32501391768333	0.0449327893711348	0.0796467188327907	1.18687529229341	0.167496456868457	0.27870675271979	1.81327620301962	0.031485739153674	0.0601588823922478	-0.835404068125227	0.387047019387729	0.557633292664704	-9.79234410408646e-07	0.999999358202349	0.999999999999823	-9.79234410408646e-07
WASH9P	0.375443738130046	0.0580908641552788	0.129404634124494	0.407986507448198	0.0393420479501088	0.0796473125257642	-0.0570535642599251	0.773240102212163	0.953072296946977	0.0213992296418978	0.914054959597132	0.999999999999901	0.825221088958919	1.19163826180686e-07	3.95516538045983e-07	0.64300922923887	0.00109191636737369	0.00274214881315374	0.542959837310859	0.00600777752178902	0.0135358277625291	0.488483109746953	0.0135997096477465	0.0295640281678251	0.456803392571485	0.0211306581733249	0.0428905508823198	0.524290887654519	0.00799079456840317	0.0177295050741034	0.729149870862995	0.000224286363272351	0.000608184553538508	-3.52599144743045	3.56791247696254e-82	1.48969905447852e-80	-0.988386335762031	1.37865027653779e-05	5.08877792475279e-05	-0.430720165752225	0.0592628602630064	0.106522569092966	-0.919964648973099	7.09587152339684e-05	0.000210040879785103	0.506129047186742	0.0344973816287181	0.0761188721971111	0.462079721620958
MIR6859-2	1.18953074868703	0.00173427913484681	0.00577119714637258	0.548357114774943	0.157782691321347	0.271191803840517	0.343494140057053	0.377206110244199	0.573387190605918	-0.189885970784436	0.63255873345443	0.846042010673332	2.22905251865882	1.23813555253688e-13	6.03478335712282e-13	2.05736182751606	1.7766703511696e-08	7.68582318879691e-08	1.7650732062042	2.24745905210187e-06	8.0150646363406e-06	1.58031687479812	4.16199153855993e-05	0.000131500990656276	1.43223472039969	0.000233828891054273	0.000646798344365563	1.29221403493283	0.000833149749013737	0.00216858577772547	1.76311949347937	2.86502811720285e-06	9.60030514778701e-06	-3.30354162076638	3.03162984061468e-12	1.29340346144193e-11	-1.07169785623031	0.0322859496492345	0.0653251650327646	-0.470724717618615	0.334718093003479	0.484993760423055	-0.468745425509657	0.364139262805263	0.529282643177593	0.509197624912223	0.299814875906687	0.482516960008319	0.658447064177681
AP006222.1	1.16658584827207	0.000354542370356961	0.00135266442160932	0.261584178766146	0.435168424867719	0.630157228442633	1.28823891040069	6.42524287589535e-05	0.00024172443272433	0.149522601560818	0.652862793099411	0.865065107803923	1.55165038321679	2.46126016533268e-09	9.2240899285282e-09	1.6173207139535	3.62494697562603e-07	1.38703970931781e-06	1.71699777509932	9.46958971823925e-08	3.90147741623701e-07	1.85750394222716	1.0740214510797e-08	4.93949797043908e-08	2.89505362971209	8.54683465802738e-20	8.35181689576416e-19	2.05462307804059	1.62332184452714e-10	8.54192424751347e-10	2.397609228505	5.74881044328259e-14	3.55792230773937e-13	2.30637456192795	3.90950706833727e-17	2.16276237010387e-16	2.29200971477753	1.52558998501904e-10	1.03020040508365e-09	4.06291196708115	1.7573909317937e-30	3.45887398787811e-29	4.06097338956109	1.92219964176709e-30	4.00391247182724e-29	1.05822933878914	0.0205166685244864	0.0480870234738098	1.87052462172322
AP006222.2	1.41099902420984	0.0600975773273316	0.133215826382504	-0.54267064462248	0.524376537209037	0.727539544942285	1.80311871929847	0.015273525993895	0.0367537212110859	-0.142452213715925	0.863131818693983	0.999999999999901	2.11746157059407	0.00053693452086158	0.00128531475426088	1.05736403299737	0.159081708436614	0.258698967330206	1.15394587193532	0.130251590981156	0.219344132655577	-0.145410042658865	0.8666638059877	0.999999999999901	3.61021002018427	7.49117594867463e-07	2.74289340584097e-06	1.56435586401686	0.045236743286342	0.0861111441715469	0.893832210221631	0.260405143524102	0.401574152247239	1.1929920145477	0.0759893910144547	0.128787561400063	0.43413783817453	0.625754549525728	0.813845687457436	4.76895871609965	1.78868313929716e-09	8.35046691329107e-09	5.0186851779431	2.40239682638757e-10	1.24953108538396e-09	0.621207928191485	0.479779370592076	0.698407954658179	0.614478530316648
RPL23AP24	0.49381962162383	0.349475244472994	0.560187387531671	0.061222252173966	0.910646387958969	0.999999999999901	0.406787948207467	0.441252020271228	0.646407867314374	-0.0173549010164158	0.97444952229764	0.999999999999901	0.677495602912421	0.114185676791851	0.192215081380334	1.23906564481166	0.0108444035757912	0.0230623553227709	1.38149299273304	0.00561428964158748	0.0127138257961945	1.55378874883058	0.00327903254938953	0.00798312152154712	1.72501952358568	0.000917088410194289	0.00233924646213876	1.6319833219299	0.00144869138576406	0.00364461733842202	2.12215790461842	1.42892911976401e-05	4.45715684229716e-05	2.15725626607852	4.04199663706918e-07	1.23023414471758e-06	3.26927256367861	1.24298540895877e-10	8.46132244921044e-10	3.02509395507062	1.13820326613333e-08	4.92394149792668e-08	3.83361138901937	1.36382828562269e-13	9.25840588809646e-13	-0.258898437713348	0.70544371847383	0.912185402248728	0.710138237004483
AL732372.1	1.2618732292778	0.088801935856609	0.185983659116965	0.816967151554016	0.28902653789662	0.452257252949253	0.299582682848778	0.710891991515414	0.906622884073912	0.294120018678564	0.710812050845071	0.911574006587409	0.813925461473133	0.206131455356999	0.326073500309288	1.45108231757479	0.0463565691808918	0.0865259423131377	0.516423788332811	0.509034617282973	0.687500880663091	0.295324013567937	0.726794308585924	0.906674775356583	-0.190092566382841	0.828302015462473	0.971363016494559	0.567097252829616	0.491345691798084	0.671149628230469	1.82963526508245	0.0145437828817807	0.0300254538577259	0.608887652871149	0.383773662726247	0.540581307813475	1.34966616915755	0.0947331331632129	0.170178918958042	0.872767989998372	0.290465453998664	0.429772347117344	-0.166516739261839	0.860853855474496	0.999999999999922	-4.12288571949801e-07	0.999999695574839	0.999999999999823	0.265492169409903
AL732372.2	0.549431297944317	0.142069438494188	0.273949220971954	0.709519787670059	0.0573554577859429	0.111205080743894	0.802432109519837	0.0312016121031719	0.0693023973895048	0.779145998246242	0.0365663755564937	0.0773358379151044	1.27996933210907	1.3507891368532e-05	3.80512750083859e-05	1.15822434247721	0.00180639825464229	0.004391000139287	1.40426813057391	0.000159845537510685	0.000456878290357147	0.547226496730723	0.144357715672559	0.248064503738141	0.527037703906809	0.160085141180986	0.263601694634024	-0.0930034058315647	0.805205920953983	0.955042235928873	0.502336073953772	0.179766021684223	0.291297794684809	-3.07606812071272	1.69105109462599e-18	1.00263373610897e-17	-1.88433778088207	2.11856882905382e-05	7.61836388215419e-05	-0.573098878843554	0.191265436952314	0.299612733209356	-1.33935727425187	0.00327032021874278	0.00766102654997319	-0.260379461047786	0.556191963475147	0.777509981316786	0.0188273723344555
WBP1LP7	0.123055868383127	0.882636508632641	0.999999999999893	0.729753865143508	0.340456693428061	0.517646239178894	0.210679594144479	0.795101670812513	0.96914435812473	0.698417340752922	0.362011479680863	0.55469057037068	1.10103864920439	0.0818387156380534	0.142552654445386	1.75522993079925	0.0124429123386055	0.0261605093252505	1.53875453174455	0.0345388332212743	0.0670955776640577	1.37643998561213	0.0753163584116832	0.139739114968102	2.18161395782692	0.00307066246548014	0.00722498918519055	1.15764109508523	0.13535605703673	0.228546399279525	1.57977903722319	0.0342356951874948	0.0659232663316134	0.75384477263206	0.276018548040253	0.407997997374622	0.976348728382695	0.233244668575894	0.369118816507663	1.40122047445338	0.073315006923648	0.12872011268486	3.08011534187554	4.3494087553697e-05	0.000132337642387513	-1.77274560725894e-07	0.999999865327938	0.999999999999823	0.27942484242656
CICP7	1.60360030451117	0.00706423910326984	0.0203558508217628	2.38053854810683	2.80715664384949e-05	9.57417953415578e-05	2.80966050765548	3.29002870981524e-07	1.69219388246453e-06	2.19542986113373	0.000101119612253924	0.000347874191277936	2.66612902899467	9.14452030106204e-08	3.0610124036636e-07	3.45961113789615	5.96053395357445e-11	3.17317278308776e-10	3.27100229920177	1.49094477910683e-09	7.25495139319331e-09	2.95565358132146	5.04474761740175e-07	1.97706859350705e-06	2.61073354095048	1.34760009225623e-05	4.33391786205799e-05	2.76835252111828	2.25487441135003e-06	8.14634818882917e-06	3.04409376683155	7.02567047816343e-08	2.72623743013155e-07	-0.0548394253659372	0.929806233723455	0.999999999999938	2.4656617898104	5.51401697422443e-05	0.000186274615579356	3.26690700093649	6.78410010876724e-08	2.73726862967347e-07	3.2980702118694	9.48784241718254e-08	3.88233065103883e-07	-1.68324778556514	0.00357075737866984	0.00984485299108313	-1.9027878075118
AL732372.3	0.176290474216992	0.607145785666843	0.829157983102855	0.334529549570663	0.327122765158466	0.501184857916906	0.537093021171988	0.113935283280152	0.213680111815799	0.0651184276807946	0.848720031898711	0.999999999999901	1.03741377022031	0.000111704519261663	0.000287363735486033	1.04042987331779	0.00206464468838817	0.004974748830016	1.15616464459034	0.000650476653839975	0.00170878175172158	0.972040445220708	0.00430852310640404	0.0102814951519946	0.76532368892761	0.0250585458101783	0.0500948211280796	1.33710011597445	7.96164943165424e-05	0.000240094761365584	0.954532105510944	0.00501021741426206	0.0111779008846093	-3.46661988614401	4.27170190683102e-24	3.22469242470359e-23	-3.68379863282218	3.35007957982992e-15	3.54361174603313e-14	-4.38251124229918	6.0123084158663e-17	5.05825128673931e-16	-3.04230959039836	5.11471813064691e-10	2.58194042658695e-09	0.713591675438767	0.0779235079412198	0.155461956524028	0.703900432783263
U6	1.61651238028143	0.00747205626756393	0.0213874763322376	1.22816965653366	0.0463877612199426	0.0921336552450126	0.719816551548866	0.260988658068074	0.427243588063575	0.957393126499507	0.122929463856699	0.224708723694975	1.88269728845798	0.000200322043163509	0.00050154966771522	1.7289861209357	0.00327338408302503	0.00764168757531828	2.1384149181744	0.000301601572303123	0.00082997911349522	1.40789960054034	0.032055165769312	0.0648110567924317	-0.639079598552688	0.405401906327093	0.575022365828091	0.569681186309569	0.412885600423211	0.585953946438071	0.343654999849029	0.621468231015065	0.81030411695126	-0.426792528072623	0.481487993926523	0.651424932959413	2.1921075206044	0.000716572677471103	0.00202034959768421	0.949451331073946	0.176306280896172	0.279459675645	1.70277632122629	0.0144100965569429	0.0301457613221901	1.98938944648577	0.0245148180912928	0.0563150543295434	2.6356510277532
AL669831.3	1.44523256870347	2.12727477395872e-05	0.000101021492407247	1.28526814490413	0.000156459051696438	0.000483696153109975	0.530683136756705	0.118566868601056	0.22100635988115	1.21368657732314	0.00035686047502476	0.00112546692908937	1.18457841249105	9.53344406024038e-06	2.72539031622242e-05	1.96758674095428	7.09189664395848e-09	3.17703571363404e-08	1.66872667894871	9.15709042205326e-07	3.40892669682917e-06	1.37699318340386	5.11178090500525e-05	0.000159757189377064	1.48423016227696	1.26578221238238e-05	4.08357836131036e-05	1.12980872801258	0.000889349184889979	0.00230597142642705	1.76578063602282	2.0514756957581e-07	7.61830445500586e-07	-1.95586985086448	1.08916917295829e-11	4.50596813704014e-11	-1.63803994168596	2.21069488811698e-05	7.92432962726112e-05	-2.38174206326696	7.80998352338891e-10	3.77085666006199e-09	-1.83882771959862	1.97841544485084e-06	7.04353984054389e-06	-0.673530881962306	0.099144637468934	0.19167124662847	-0.905659493475956
AC114498.1	0.212884814972622	0.789299393116077	0.975692445833201	4.74573683215186e-08	0.999999955320623	0.999999999999901	1.24708537572798	0.0835589964653247	0.163751921508154	0.123575345658352	0.879966874879959	0.999999999999901	0.182924588906913	0.781005768208873	0.952704656297169	4.74573681613473e-08	0.999999955320623	0.999999999999901	0.33571485103398	0.673003574960242	0.848020623131701	4.74573680812616e-08	0.999999955320623	0.999999999999901	4.74573676007476e-08	0.999999955320624	0.999999999999893	0.395468422675463	0.62820506312956	0.811422286307419	1.12069882249769	0.139227623832331	0.233015875433046	0.867170445337849	0.201157813023704	0.308975179643906	1.27884392897369	0.101900050625606	0.181470162944704	0.323797596373638	0.709233167495728	0.880132510239455	1.42372072850205e-07	0.999999881789488	0.999999999999922	-0.504070807009318	0.599223007845858	0.811115489056789	-0.504070807009317
MTND1P23	-0.418134642319114	0.345022519566316	0.554989741767829	-0.518521556854356	0.241612955418123	0.389779672917822	-1.51741797458177	0.000615109224905013	0.00196403369317548	-0.75432702950641	0.0885021016686471	0.168820228085392	-1.08018627233048	0.00193942414786008	0.00435378957083202	-0.332704501342028	0.452106457235899	0.623922904709351	-0.591672961721352	0.181454476538594	0.292154752815917	-1.01563754786776	0.0218867755042191	0.045733433756613	-0.916606682115935	0.0385630505060073	0.0741966851351173	-0.538239334212925	0.224111947762513	0.3529733287696	-0.427866397614547	0.33386281971904	0.494972292615477	-1.68289269267526	7.07835299786768e-06	1.95266771572529e-05	-6.68328897610586	4.87981123727318e-35	1.96769840702976e-33	-5.57637420764234	3.0703116884669e-25	4.43115803132335e-24	-4.92759628557069	1.16829255825838e-20	1.33108236621108e-19	1.28024271534773	0.020462882888821	0.0479728621281074	0.132521932714047
MTND2P28	1.02525536091985	0.00261611815363861	0.00836566295853149	0.0572974110927335	0.866444584257982	0.999999999999901	-0.016892479183341	0.960455203616997	0.999999999999893	-0.0167007965226621	0.960903308842549	0.999999999999901	0.534485021228151	0.0461631131068827	0.0844104551107903	1.49172040085381	1.19092037586e-05	3.87674235137791e-05	0.926793965666433	0.00651676712693497	0.014593564012371	0.339663327025188	0.318764223372716	0.486284076357135	0.599311739386566	0.0785471785556674	0.140793574675903	0.657529830835616	0.0535888082284571	0.100141408904487	1.22178516925736	0.000334938148148061	0.000888752772373349	-1.28759812464846	7.81009036920159e-06	2.14692703451251e-05	-6.37789414454778	3.86814847404235e-59	4.73203496657848e-57	-5.72272668107196	1.27741291089953e-47	5.91137379491604e-46	-5.59678928214329	1.04353934764183e-45	4.85949622652312e-44	0.724676543556519	0.0753880858441555	0.15100313832084	0.574699675348778
MTCO1P12	0.479202357315621	0.161629233745087	0.304749136407482	-0.200737856808026	0.557681366760629	0.762183442230658	-0.724032659687449	0.0344628153192625	0.0756046817404795	-0.210975869127957	0.537764152989004	0.752852276697803	0.138065371884914	0.608292718905478	0.802375937277984	0.715503472337145	0.0366304348227259	0.0699535737733801	0.410183106131402	0.230901406827334	0.359225348228175	0.163761445295626	0.632437578904031	0.822633117435927	0.21072296148651	0.538250488049237	0.721593253979901	0.329664889013716	0.335611528531744	0.496066142225858	0.443570089276405	0.195121010194236	0.312867562520743	-2.19307991343377	3.51660628282167e-14	1.67169177585683e-13	-2.58529126984202	2.78410066053866e-11	2.01750696886022e-10	-2.31316327465623	2.57337616213644e-09	1.18272066924568e-08	-1.81096147128372	3.10027328037979e-06	1.07803821701522e-05	0.582950825807098	0.15461327351596	0.280285336465848	-0.00239065311662477
AC114498.2	1.04098906937582	0.00232280749949821	0.007501364452984	1.55454476437549	4.87366596706137e-06	1.82514394847612e-05	0.888018950388272	0.00916737757606012	0.0232404558879596	1.61261578235737	2.06407490279449e-06	8.86255061893111e-06	1.02622527399225	0.000146503002235858	0.000372337669714059	1.89994935580252	1.97634545060506e-08	8.52293469574026e-08	1.43064437515004	2.62523634814292e-05	8.312532425785e-05	2.23785791527823	4.26215324708922e-11	2.41845324365334e-10	2.6165008000722	1.17437823966185e-14	8.18322833853173e-14	2.66453376529379	3.55940720863186e-15	2.6910326234658e-14	3.37836794448309	1.67415914966659e-23	1.8591391310106e-22	1.77489287314385	7.73615585835574e-10	2.84949345165298e-09	-2.93392879551569	5.3052440910333e-11	3.74167096831183e-10	-3.27689181727994	1.35835682255249e-11	7.65811555168597e-11	-1.9129644428078	2.42379990496506e-05	7.59571716768373e-05	0.616271629983401	0.152981594507339	0.277681816006117	-0.180101205911497
MTCO2P12	0.058765023727551	0.912177889834037	0.999999999999893	0.216858175556189	0.683919963242985	0.880295364322093	-0.823958209398628	0.122194845546448	0.226802275798726	0.37320041014641	0.483402931035156	0.694467172374773	-0.500031877745908	0.233262505101844	0.36288437219587	0.933246550926123	0.0794197786623295	0.140179995374475	0.713250036542348	0.180310634308151	0.290535502261357	0.191516704169326	0.719221265161472	0.89980318788713	0.715346974053258	0.179142575878881	0.290287052135114	0.725125177621484	0.173157702045595	0.283133731576994	1.15702665300728	0.0297159616116916	0.0578218105809476	2.24094107474619	6.30434381359883e-07	1.89085512722685e-06	-3.86338104055911	4.27283043879264e-10	2.74551852833154e-09	-1.83786566764578	0.00261725475067343	0.00607672971143444	-0.763858079760053	0.207888580926795	0.327765879818119	1.5492261113612	0.0168030084793742	0.0401865075965874	1.13103952512954
MTATP8P1	0.91764032828457	0.0685738737980561	0.149224861869387	1.15170722586702	0.0222549970312376	0.0477042128502706	-0.929698170513845	0.065187285140789	0.132207796496305	-0.359013701531844	0.476342631257816	0.686758527117141	-0.397704970058935	0.316033787769255	0.472053243619138	0.0766928546359503	0.87900739384846	0.999999999999901	-0.405203386245243	0.421501411255564	0.592505165833587	-0.645877044906804	0.200254641509453	0.32866098258421	-0.532664115804286	0.290815204110005	0.438525116406318	-0.552011513486972	0.273536873824528	0.418197925651333	-0.917233612680795	0.0689759083943138	0.124415378356259	-2.93066870611594	7.28780068230772e-12	3.04084654272662e-11	-8.45064446804796	6.35031467341658e-36	2.69587625272302e-34	-7.21500917018383	1.08665546038973e-29	2.05591084053202e-28	-6.1736643352672	1.04886288370975e-22	1.37850930728786e-21	2.45746794766707	6.16163122650797e-05	0.000229648867166291	1.21761007235997
MTATP6P1	-0.250152075372469	0.496611902361972	0.722965291056281	-1.15015927908349	0.00177459827088487	0.00467501591098541	-1.44950970354705	8.18237211299126e-05	0.000302813155359893	-1.23053643627002	0.000825657545742245	0.002443161580509	-0.804695390696844	0.00544548994331476	0.0115386310272814	-0.903715999593629	0.0140461687234224	0.0292113207075715	-1.30353004589318	0.000396558791841459	0.0010731601923215	-1.40941054022853	0.000128148815620747	0.000381074731543764	-1.24365198730336	0.000725929791401919	0.00187925388044349	-0.83252886686351	0.0236653841099162	0.0478299567516734	-1.73871515004724	2.30281478197684e-06	7.78380682332233e-06	-2.51063841645371	6.95149224986652e-16	3.61166676740603e-15	-8.84494816571707	1.06785782059635e-94	4.25848245526952e-92	-7.50072798346615	1.82140199557897e-69	2.03270817967814e-67	-6.44771337111541	6.6875164461915e-53	4.22316663576993e-51	1.60827232196537	0.000256753794413669	0.000866491318619596	0.775336301619753
MTCO3P12	-0.272680991829582	0.460663616055976	0.686102339085215	-0.371461061556408	0.314904258084492	0.485819284845197	-0.805312669145849	0.0293461179547853	0.0655641381937376	0.0149131405465847	0.967799819306681	0.999999999999901	-1.35754573319588	3.11150635213967e-06	9.25303567786576e-06	0.466761686078021	0.206085462197138	0.323321508217239	-0.0135911725849046	0.970652039321993	0.999999999999901	-0.367215279288136	0.320470853472538	0.488410100662478	-0.31232006808488	0.398156953738454	0.566908006502995	-0.0284857765163498	0.938537765489103	0.999999999999893	0.654339775580251	0.0764062619802097	0.136358609510005	-0.759629535042199	0.0150783876234685	0.0288249733732754	-2.6436079956794	3.60310555926415e-10	2.33593041672417e-09	-2.02090567604431	1.69120533666505e-06	5.90490768987434e-06	-1.50870228087279	0.000337777015131639	0.000916052538732673	1.44945957607756	0.00133201512915563	0.00398810918780024	0.868663339689169
WBP1LP6	0.27392693727851	0.738763676598388	0.939328141677964	1.06805785408126	0.162953171246218	0.278909268724552	0.805474942514546	0.299625856740982	0.47778505198237	0.49870798862405	0.527714758449974	0.742089770356714	1.37216971636712	0.0313418925912113	0.059096977838505	1.70588883076717	0.0173678156162663	0.0354756078374146	1.0129045489512	0.177665170300777	0.286913176302313	1.68387849867735	0.0298403146560059	0.0607186951943369	2.30653342303321	0.001872116375756	0.0045553578139178	1.44662409454943	0.0574489534502333	0.106616753000773	1.10381142886432	0.160318887643197	0.263599780828156	0.400714702826458	0.57431892240924	0.74948996738742	1.81338553757163	0.0207404721613747	0.0438754418397303	0.215466142620804	0.800406449725051	0.9496711388991	2.63661541428705	0.000680273766935531	0.00176433018497559	0.343152401233388	0.740763479644298	0.943496224767646	0.279780337122319
CICP3	1.40685214912892	0.0107678890610256	0.0296325531940383	1.35859294189216	0.0140360314435048	0.0314335624544749	1.73371651869613	0.00123366502559274	0.00373172610232609	1.43403772598346	0.00802195047878268	0.0197549157720386	1.92607599655976	2.84478556450432e-05	7.75852033073558e-05	2.67802881945599	1.12656661355468e-07	4.52619657786384e-07	2.55651851617824	8.38689717608176e-07	3.13523475346679e-06	2.41884896170257	1.3249113431474e-05	4.45038097368719e-05	2.22921991496497	7.26047841658407e-05	0.000214191368326369	1.81346762635293	0.00141774958804276	0.00357166238977444	2.37538122116815	9.83215793205748e-06	3.12244600608861e-05	-0.792019864768041	0.176210490944224	0.274654741770879	0.618267861926226	0.344859261744039	0.511247319330521	2.18666425730068	0.000255830896039858	0.00068765591952411	2.81473033040577	2.35342182032095e-06	8.3032801064032e-06	-0.375765350884218	0.523840148058699	0.74766382165052	-0.0264620200907672
AL669831.1	0.550761393337261	0.0350401489041024	0.0836419987762436	0.406960697854234	0.119441111958673	0.213160852565095	0.572069296850122	0.0280858897720261	0.0630977444669076	0.32698241213024	0.210512982939057	0.355221841270834	0.887760968662998	1.5924080239784e-05	4.45483747740957e-05	0.966827076170082	0.000195241283707181	0.00054604571096019	0.998024284314444	0.000126098582659777	0.000365452443772177	0.561652366675463	0.031627865312019	0.0640408007006403	0.551267002768697	0.0350700939502348	0.0680750371040576	0.644158972053191	0.0135273928686295	0.0286878628416743	0.577715264573892	0.0269797562014527	0.0529605507857579	-3.26597441217601	6.47110965968326e-41	8.70249123272221e-40	-2.08990961632226	1.58981056145669e-11	1.18234281491242e-10	-1.28739009850465	3.72194722638198e-05	0.000111587305016059	-1.59874311553768	5.21220186245609e-07	1.97615645807266e-06	0.671616259494521	0.0306303242854732	0.0685532373861887	0.621737930338384
LINC01409	-0.299631647368656	0.183951664073744	0.338342993374793	-0.606837688828786	0.00758212361864729	0.0179113183476498	-1.38555848904095	4.25413363661882e-09	2.71520754753362e-08	-1.26815516391955	4.65518111888041e-08	2.43706792493076e-07	0.688952602511931	6.77398398027284e-05	0.000178075141152856	0.398123256949856	0.0620201823747311	0.112481339307621	0.53599065986524	0.0134727225373827	0.0284579715864292	0.343053381052048	0.124679691105215	0.218439118815691	0.553262767472292	0.0124693527028492	0.0264916260512948	0.171928853331322	0.440740730204893	0.616000311898276	-0.515411920895754	0.025919111483721	0.0510873270231455	-0.787037072990023	5.96519736165184e-05	0.000151617678198444	-0.174939886702541	0.489321964150595	0.678091230371058	0.614676513155713	0.0161575465589589	0.0327265209052089	0.143607934619896	0.589422739706091	0.76996235539468	0.62203247587984	0.0322244576148095	0.0716964205336893	0.84407908715128
AL669831.6	-0.619035309439242	0.338348184680267	0.547160328645731	-0.856556464937626	0.193433439956296	0.3230658354109	-1.36485812757563	0.0464212153823496	0.0982921220590814	-1.356987847259	0.0444088504915696	0.0918870901143683	0.337679059584086	0.488983892567859	0.6769797728029	0.534003883693528	0.362631033553458	0.521945697038843	0.656825308549001	0.271309535331444	0.412243169766707	0.710116900515743	0.262358361013433	0.414293768070473	1.33851411575053	0.0273510729906783	0.0542553493831383	-0.0396304277957694	0.951364275006473	0.999999999999893	-2.05659508213068	0.00760184767979936	0.016496531237492	-1.75109479146337	0.00367994668164051	0.00766279827474572	-1.56661461238524	0.0481119433651415	0.0932378313182427	-1.50934954092936	0.0641725250603752	0.114366941946634	-2.33466007018691	0.0132554904990154	0.0279277835670321	1.90211962930369	0.0600848055173228	0.124010397091003	1.62256869102173
AL669831.4	1.14040182959541	4.53119299161871e-05	0.000203479383349266	1.55918144894962	6.02726816537154e-09	3.07574592631907e-08	1.30347603221007	1.35736602693775e-06	6.47459345798832e-06	1.12440157524625	3.32081883167804e-05	0.000121621721187736	3.22502197639838	9.48077308939547e-50	2.00513693476745e-48	3.13148253050106	1.11595254642265e-38	3.0361064414006e-37	3.23628367908184	6.76617247508823e-40	2.02037074776199e-38	3.00187654409593	8.60359489413328e-32	1.7962093043328e-30	3.13167451212917	7.52344608792633e-35	1.67792739780631e-33	2.85450806955441	3.74667817307901e-29	6.66347277340864e-28	2.58571681982252	8.45208986572512e-24	9.58848365559853e-23	2.44865646941772	3.29415487783724e-26	2.69350610175888e-25	1.32424684920622	1.55511179357417e-05	5.70312758127135e-05	2.43963117778256	5.11423605729929e-16	4.03151904026685e-15	2.94374931543534	5.40378722810897e-24	7.76858173329169e-23	1.74819551791365	5.49715395635696e-06	2.38119267708788e-05	1.73517157587464
FAM87B	1.91712328187962	0.000968822012152717	0.00339472185951026	2.18183038634025	0.000145930613443894	0.000452883913782094	2.38088211633572	2.69907483002063e-05	0.000107928720685418	1.68959858531923	0.00352891465382709	0.00930166676926645	3.61258218937251	2.21333844069163e-14	1.12359888790201e-13	3.87879040822288	1.17474710891318e-12	7.15603096580496e-12	4.00471029586432	3.4348134036639e-13	2.22634635904374e-12	4.07055116664788	2.80057106850972e-13	1.8729714405782e-12	4.18636182737486	5.10083810603076e-14	3.38553167928305e-13	3.60017991168069	1.38140598138483e-10	7.30885689322079e-10	1.88696836415754	0.001645511323627	0.00396544209922826	3.09000992967637	5.94066750217113e-10	2.20402202267203e-09	3.04857794060487	7.82221614299107e-07	3.43415359550906e-06	3.79180971739829	9.92891739932477e-10	4.74526192606585e-09	3.7907719270793	1.44660152310203e-09	7.02319207489146e-09	0.537069804869978	0.46165878408253	0.677121529643746	0.821932425047865
LINC01128	1.3848766563017	1.5960521176266e-11	1.62065163113344e-10	0.692661694108346	0.000811853529792166	0.00226206962713187	0.935216922057683	5.28556947345402e-06	2.33799461763786e-05	1.09379162886366	1.02905785134731e-07	5.17287908585922e-07	1.97165683541418	7.49006688892599e-34	9.08477956241094e-33	2.40199973035029	3.28692468406234e-32	6.64709062467172e-31	2.19283466851222	6.23820824506425e-27	1.00286090873544e-25	2.76067194457776	8.22522868499359e-42	2.74399301502893e-40	2.20064793200093	5.03174864522211e-27	7.5816494658487e-26	1.93358194678788	3.04108478376338e-21	3.42109363969114e-20	0.977905492901046	2.1570770349702e-06	7.31111879292415e-06	1.1559089924099	3.96788135293991e-11	1.58834428549632e-10	0.483907476032538	0.039034851971916	0.0773798351994603	1.24238717366064	1.19870159846193e-07	4.72248667628988e-07	1.35932382818231	6.56047850766956e-09	2.99709976676359e-08	0.895926012246474	0.000252401107320759	0.000852837704328377	1.40384751208781
LINC00115	1.72137204795622	9.19244708157544e-06	4.61405963602645e-05	1.00800755635256	0.010663299490607	0.0244868638148175	0.344346924705648	0.392806801473055	0.592017576452769	-0.725833764256034	0.089162708797314	0.169892768450485	1.71348794595356	5.15890556012797e-08	1.75680977500169e-07	1.83191335376188	1.50225210728252e-06	5.38324625420976e-06	1.6488459241133	2.19331303304207e-05	7.00218659895355e-05	2.8553298237146	8.8586835754454e-14	6.14631526957861e-13	2.44445890517138	2.71491955742162e-10	1.35051237504133e-09	2.80762971853057	1.90844660992371e-13	1.26917207536205e-12	0.859079268371048	0.0346740623911044	0.06669138847097	-0.484198609413725	0.195458081797549	0.301335423905472	0.864556054694669	0.0544189050043841	0.104082321104684	1.10130054572694	0.0174460546155921	0.0351383294011476	0.931995067129735	0.0526773759121078	0.0981820738169628	-0.196681200667465	0.671559321813038	0.878202970059312	0.717640864234636
AL669831.7	4.0138817581115	5.59482276418475e-08	3.81856152162686e-07	2.17806805455655	0.00483407970691523	0.0118406173941575	2.10384334876563	0.00650540101798907	0.017069554246216	2.71105627146845	0.00032466799516935	0.001031809009285	0.170982307936721	0.806797940843587	0.973327798467516	0.341442572700705	0.689888111385591	0.861790042662307	0.291525680857472	0.733170382245098	0.900760696425015	1.53203120063365	0.066650518034929	0.125328882756215	-0.221666927141268	0.811855828502871	0.958165944707928	0.612880885050949	0.486790697203365	0.666207161820096	1.18194362868049	0.156500049593677	0.258075165302888	1.57852158375289	0.0251390369566257	0.0464787232397059	0.546477845403568	0.558891767376357	0.750712967790558	0.998081203059037	0.264210650876537	0.395880212220478	0.855779369503314	0.352439786252054	0.514777013270813	2.15461692735806	0.0291883837000436	0.0656651750649598	2.8124710029952
FAM41C	1.43841956974211	0.0316627857704209	0.0765824378616165	0.0352807407457099	0.961875563359889	0.999999999999901	1.5457052529044	0.0194356314174138	0.0455013590357524	0.530984602691962	0.445713941206167	0.652775454236154	2.24870972242413	3.73087485090162e-05	0.000100565845352238	2.16966026636933	0.0006241018395408	0.00162537300980441	2.26967785598289	0.000437589838677702	0.00117682399879671	3.09864969562929	1.77474885957898e-06	6.56345004467996e-06	2.31804805084842	0.000610538543778577	0.00159601600401044	2.73382368032231	2.75500820619093e-05	8.79134787785185e-05	1.80311610164505	0.00767668119515185	0.0166462300274825	1.33800979271031	0.0242481820188475	0.0449370101593601	1.14352377739302	0.130813265397082	0.225100864341555	0.720091300749287	0.349296653490793	0.501570312453933	0.722786584733291	0.363756481548881	0.528830171651245	2.1195371110352	0.00534530256076391	0.0142395701027975	2.78490635692743
TUBB8P11	0.710810206404625	0.184979057038831	0.3399018056305	-0.946085945872214	0.133682093436538	0.23492712002491	0.58636036504225	0.276387654960618	0.447819292631362	0.113828832919485	0.836281333164767	0.999999999999901	-0.284690492868195	0.539915326811376	0.732176054389428	0.104786451965844	0.849247201604869	0.987747931279248	0.366877355469808	0.510300793921575	0.688711017922224	0.606389150737719	0.311016975934752	0.476329299256802	-0.051085101904846	0.935360277446317	0.999999999999893	0.0214949086230878	0.972252775063875	0.999999999999893	-0.210626149158095	0.733004783392235	0.911507464962277	-1.08775332955744	0.0462193153138273	0.0816841764100952	-1.75802570542845	0.0451620382872505	0.088138283345385	-1.43582844663652	0.0641371395496942	0.11432355159209	-1.75802570542845	0.0451620382872503	0.0853108316721512	0.809229413374541	0.143396099657882	0.26295037110013	1.32035459171432
AL669831.5	0.435503483106587	0.56524530665446	0.790385810180297	0.110815395091681	0.889905149336785	0.999999999999901	-0.0454340639626804	0.956373988839497	0.999999999999893	0.0781522478191249	0.922250198746105	0.999999999999901	-0.045434063964265	0.9438684132345	0.999999999999831	-0.0454340639626819	0.956373988839496	0.999999999999901	-0.045434063962681	0.956373988839497	0.999999999999901	-0.0454340639626808	0.956373988839497	0.999999999999901	-0.0454340639626813	0.956373988839497	0.999999999999893	-0.045434063962681	0.956373988839497	0.999999999999893	-0.0454340639626803	0.956373988839498	0.999999999999901	-0.0454340639638691	0.947969843561388	0.999999999999938	-0.0454340639614926	0.961692620898623	0.999999999999876	0.27839967412714	0.743763935782269	0.903910694693046	1.03148957913361	0.185404248807457	0.29815186534569	1.68332211251761	0.0444990450700401	0.0953764413981345	2.81856012633335
AL645608.6	-2.61512515608344	0.000102989625026533	0.000434476017895323	-2.04451859081442	0.00116139925157644	0.00315195051596204	-2.41851843795113	0.000309869449085557	0.00104507376598989	-2.51213622378599	0.000107130657807036	0.000367325723709935	-1.42229081266578	0.00117732713312428	0.00270930251862033	-1.81009071383686	0.00188384311202365	0.00456708980393525	-1.16678036528898	0.0349358033870976	0.0677932291898297	-1.95979843625436	0.00336827048571444	0.00818719402067558	-2.44589382074883	0.000442040436015615	0.00117770242955835	-2.42537274923797	0.000491915432109479	0.00132553389997464	-2.82559304248722	0.000113912754954066	0.00031964160887482	-2.00058309611515	0.000129928875891489	0.000319342805415914	-1.546393498093	0.0199200089038368	0.0422828487403067	-2.81756298033869	0.000490824163688986	0.00126499839081758	-2.80178335630403	0.000526904741389187	0.00138888817629709	-1.0784767848584	0.091443000557034	0.17874996967981	-0.386232057201598
AL645608.2	-2.24914898025396	0.000199735369001243	0.000797001150997779	-2.9888736210374	2.64963461425759e-06	1.02274796676893e-05	-4.04169310630221	6.28335354725185e-09	3.93329938393236e-08	-2.4053201610929	6.27224267706541e-05	0.000221918662242309	-2.22731510313632	1.97975938265376e-06	5.98265788541079e-06	-1.95182707843092	0.000822826166599215	0.00210228543584766	-2.05598730949675	0.000601954658840194	0.00158864928321658	-3.42410721853863	1.07633372989306e-06	4.0784499072628e-06	-3.6643452451033	3.71961892264957e-07	1.4013689507832e-06	-2.4261550364383	0.000178086325902595	0.000511890696046706	-4.61735705290417	2.00993665054348e-09	8.87752607713111e-09	-4.90201949476492	3.59585302396635e-15	1.80151916363438e-14	-0.822714986506212	0.204958562837554	0.331079366359543	-4.59534153480369	8.94745238488626e-09	3.90728560336115e-08	-3.85755669470004	6.61081249999632e-07	2.47919831755004e-06	0.675675457893106	0.298032686102457	0.48027052821007	0.612524291748495
AL645608.4	-2.3242417791248	0.000543054947284654	0.00199939879539246	-2.53517143416622	0.000524913637179372	0.00150692269265743	-2.395485186484	0.000589267342466632	0.00188943941461419	-1.88713922409772	0.0021063420344092	0.00579612510555074	-1.73107013597228	0.000166627513075131	0.000420419650403242	-1.21146044789314	0.0318190239389747	0.0616287992142645	-1.30685130829185	0.0208485698017472	0.0424152696732101	-2.53517143416622	0.00052491363717937	0.00143878328259733	-2.08680594903872	0.00265143105244298	0.0063010337890149	-1.44315934905876	0.0250528505259228	0.0504141390599394	-2.53517143416622	0.000524913637179371	0.00135610165409516	-2.31917704177559	2.71207736219238e-05	7.105471526853e-05	-0.901354804648662	0.155370270886794	0.261032138085423	-2.52712749830623	0.00170800199909381	0.00407038830682842	-1.05171121952234	0.108207737707163	0.186064130223809	0.712485907092927	0.186953109424294	0.328037741163975	0.476513413250395
LINC02593	-2.43311050572581	0.00132204911678387	0.00451225680126587	-3.81081075964498	3.11756043877004e-06	1.1950024609448e-05	-3.49980370699921	1.11261422809653e-05	4.71105757373572e-05	-2.12249652072852	0.0046153351034208	0.0119044271837859	-0.985993445681181	0.0884370114800273	0.152825551477702	-1.31524402153033	0.0724701874110274	0.129224431422649	-0.736076038474089	0.316230860113465	0.46848693483611	-2.58479540585823	0.0014141603681657	0.00364745008294685	-1.84519400248371	0.0179398617549173	0.0369538308789913	-2.19066284236081	0.00448731212044277	0.010404828324826	-4.69014018746521	1.73640871412938e-07	6.4891300006629e-07	-0.928527719002237	0.134501554446034	0.21584859236585	2.93993970521957	0.000283377406714893	0.000857241198213026	-4.07549642297533	1.11059266619531e-05	3.5373243962106e-05	-3.5397590138785	0.000135753901105339	0.000388254957524456	0.00763245809928927	0.99293726373681	0.999999999999823	2.77236993635581
SAMD11	-0.517466747387621	0.0101303260510519	0.0280891178488811	-1.52028267481769	1.00701414439808e-13	7.8164786917472e-13	-0.701914957037693	0.000461099608618569	0.00150921301360278	-1.48245865303609	2.97454432352838e-13	2.57724579190468e-12	-1.25897608710291	3.11968010750442e-15	1.6563020382746e-14	-1.35915457143661	1.21629812689988e-11	6.86454197789382e-11	-1.37098650928607	1.5933574888919e-11	9.09552534932354e-11	-1.06186891040284	1.89724088541059e-07	7.77295107563026e-07	-1.27504162015726	5.40941200735659e-10	2.6321013081119e-09	-0.645063283416112	0.00134795009176899	0.00340497959812256	-1.77886310948471	9.09022849013361e-18	7.19086872858926e-17	-0.252626900564842	0.136196117004308	0.218187782052262	1.9348668606332	5.23966274672255e-18	6.97785851881437e-17	-0.7722687011894	0.000925678122937436	0.00229373099052872	-0.511175485269966	0.0272824172573507	0.0540937095699121	-0.465068338500186	0.0553757330692834	0.115589195890134	0.341494985640884
NOC2L	-0.463774900279783	0.00592001683883111	0.0174178657998047	-1.40795410657109	9.91321498495483e-17	9.66019235429532e-16	-0.590092308923816	0.000451785789632604	0.00148088302996845	-1.2326970578385	3.0709937195108e-13	2.65748084425574e-12	-1.32509173355922	2.21905724159333e-23	1.74310238122366e-22	-1.10759779247574	4.42261602406902e-11	2.38182147553207e-10	-1.19222096562646	1.71289011913499e-12	1.05510803174477e-11	-1.19194562888483	1.8977027702978e-12	1.18924182028262e-11	-1.23046466316525	3.85877515116517e-13	2.39522945881194e-12	-0.858809176218474	3.51866794205418e-07	1.3770614546712e-06	-1.71753395868822	5.54760063603414e-24	6.36513485689942e-23	-0.91752127708834	1.28060627603632e-10	4.95512151089734e-10	0.687360675144719	0.000298894224332111	0.000899987924228544	-0.876677386967796	5.09956004549854e-06	1.68853838375888e-05	-0.533477855704865	0.00535665577662065	0.0121218243272625	-0.996335183887351	1.09512268549357e-06	5.20530391373112e-06	-0.957662165455645
KLHL17	-1.60070403495361	1.62341253592182e-12	1.8210671564792e-11	-2.42457248088348	2.79501065174744e-26	5.06948069954927e-25	-1.6761499588918	1.1177116093944e-13	1.11835084289268e-12	-2.25652891176936	3.32656063218545e-23	5.87927356451249e-22	-1.27123834849865	7.58709388596509e-13	3.54482028298592e-12	-1.36363539077141	1.23164043838998e-09	5.87034613520923e-09	-1.3419640916363	2.71654234867178e-09	1.28931812237343e-08	-1.08558496843732	1.49999190542714e-06	5.59308629008149e-06	-1.37072388286185	1.42429433596842e-09	6.69047250876495e-09	-0.889315738014518	7.72462163199256e-05	0.000233453584152548	-1.77820242345244	4.88881742954151e-15	3.25694484945891e-14	-3.58231917503891	2.48008602189812e-73	8.39615218349278e-72	-1.36765796062302	9.2216045672249e-08	4.52906695996579e-07	-2.11623364893438	9.10273212368143e-16	7.0627326574857e-15	-2.27379380214888	1.00579937007541e-17	9.33392630476973e-17	-2.87618231358284	4.19773769188821e-26	1.13762785629216e-24	-2.01195991850472
PLEKHN1	-1.17461009197046	0.11155066202126	0.224742754495361	-3.84001305001664	5.9958170291495e-06	2.2247116449417e-05	-2.11718195952248	0.00560143857349581	0.0149193771579488	-2.70318179918537	0.000515633197554439	0.00158085464984794	-2.41779284309704	6.36348834245185e-05	0.00016764894978084	-2.48273882137739	0.00115632921487679	0.0028945928954272	-2.68679911172566	0.000634576037338372	0.00166982248023549	-1.96175969016488	0.0141570561454187	0.0306818672456244	-2.32564193219935	0.00359977890763375	0.00837319067657551	-2.78734869672785	0.000761645594223935	0.00199334328407978	-4.61725928193896	6.30166734050385e-07	2.24123633749131e-06	-1.99518971999153	0.00192060632763472	0.00413919268380374	1.37006164041517	0.093490769420973	0.168281391338615	1.87760390551226	0.0219329280788947	0.0432729603285614	1.27631413321151	0.122538889559528	0.207608969988877	-2.13249964687336	0.015597497900964	0.0376233982713495	-1.81960580855571
PERM1	0.0570123565244958	0.934848676881726	0.999999999999893	-2.71042822679001	0.00218271214606362	0.00567749285591953	-2.34027960241452	0.00506781311604446	0.0136077926422574	-2.71042822679001	0.00218271214606363	0.00598890156786932	-2.18518899668735	0.000350280756535476	0.000854895818473634	-2.46875981713077	0.00320618559794173	0.00749566555165217	-2.63987918167401	0.00209473063750846	0.00509520818264176	-0.520011957732434	0.498507809318505	0.695297798862928	-2.71042822679001	0.00218271214606363	0.00525615689455586	-1.9392306771497	0.0197608367381759	0.040602115920018	-2.71042822679	0.00218271214606363	0.00516330063286889	-1.51677529493956	0.0189537962161596	0.0357450740332756	0.93795586538897	0.22761365488546	0.361846982400936	1.27701723533865	0.100088201928038	0.169996961441865	1.61155914044326	0.0408148824517305	0.0778975769570235	-2.16149152381215	0.019564557617999	0.0460427963432354	-0.687512099748915
AL645608.7	4.77242999248217	1.71478910216333e-08	1.24925189418398e-07	-0.774482623723525	0.397968674916578	0.586293245370478	-0.368242112321858	0.682474744284578	0.881664419411203	-1.19846895104882	0.199468870512247	0.339272421704955	-1.72904564592428	0.0192590573811655	0.0376281595043165	-1.81352663762427	0.0621403717477162	0.112678194795227	-1.88599257235554	0.0531453794259694	0.0987519003292242	-1.82778675628872	0.0679279130070948	0.127509599428533	-2.31818450542399	0.0243137379362029	0.0487730609347893	-1.53526414843436	0.118728447813828	0.203881623141697	-2.31818450542399	0.024313737936203	0.0481782912169404	-0.816925229222049	0.292126915449941	0.428829882028861	2.64273665252068	0.00603560886037984	0.014313515936636	0.679111010903232	0.498052940497742	0.66834267324353	3.21728635778781	0.000895249581893865	0.00228289304669375	0.355540042780897	0.76206017619892	0.955675698704658	0.604159169799459
HES4	4.10363642489055	1.38316157559278e-10	1.27311775811138e-09	0.384170459574676	0.554923591734712	0.759358384808578	1.31532060902481	0.0411306714556584	0.0884168857248707	0.431280874624956	0.505751929427519	0.718325740859633	-3.36755469434013	3.31486075877688e-09	1.23057712399942e-08	-2.18092768593302	0.00154615827634939	0.00380195182181768	-2.35044479043177	0.000955019299092515	0.00244753104927164	-1.87468085407483	0.0104295837285232	0.0231798876039445	-2.52961512616879	0.000749562263155496	0.00193565890141462	-1.74333209778583	0.0148503855638407	0.0312424915547653	-3.08155467248848	5.79018973296137e-05	0.000168535319786112	3.62741276075794	2.52570675007358e-11	1.02268103665036e-10	2.62190500685222	0.00029904828250352	0.000900398270951386	1.87180162974861	0.0106941808617735	0.0224201120471747	1.54405813738049	0.0364712470357132	0.0703831321600393	1.08277114877308	0.163118037129656	0.292984779645368	1.17338741291907
ISG15	2.26068642479488	0.0019591622949679	0.00643343408602008	3.51684418212874	1.4501887104912e-06	5.75943994192042e-06	3.68621085916223	4.41336520777237e-07	2.23301341387686e-06	1.98182192697575	0.00663988406696537	0.0165964507813422	0.443497307030212	0.44058573180448	0.62281321756157	0.79657134705969	0.275291647612163	0.4145787139237	-0.543397008822459	0.457534729286736	0.632532936833017	-0.0443758895344275	0.951606018426574	0.999999999999901	0.0709507041580048	0.922695544991517	0.999999999999893	0.333348834991734	0.648245935269128	0.828293793294593	0.655874868583473	0.369338901420331	0.538117245818068	5.27142082834446	1.31788304920368e-17	7.4567651558451e-17	1.26841060083754	0.125514338399271	0.217311608866726	3.76172613776891	5.46901569520244e-06	1.80590511251542e-05	1.55648454948853	0.0601634580805891	0.110724112371153	1.0861348106211	0.213596356787671	0.366483277235815	-0.156909546784143
AL645608.3	0.789005797922937	0.217720700531197	0.387866538280243	-0.0080786563466707	0.990385075355645	0.999999999999901	0.284102716453275	0.664408081605754	0.866077817935929	-0.275387998971675	0.680213514207367	0.887473522568587	-0.275677847311636	0.60834258704906	0.802420338538629	-0.436476642379435	0.519654853596364	0.697447625348405	-0.529730968373434	0.433033711056092	0.605601194163356	-0.703403876814481	0.330305290933586	0.500075744524897	-0.247441094973405	0.733341762128229	0.892897845593647	0.589355056460972	0.384833683375987	0.554149207592762	0.407751943526384	0.545049401913914	0.733156864976367	-0.845900220191438	0.163725930979166	0.257421566508471	-2.17250097597381	0.0266949318865854	0.0550802936965837	-2.17250097597381	0.0266949318865853	0.0517499123196709	-2.17250097597381	0.0266949318865854	0.0530121053030776	0.425457399016822	0.679544511446171	0.886167465068679	0.674241256602721
AL645608.1	2.31757793973312	0.000191331712322641	0.000766251470537056	-0.339588322293417	0.653972953406007	0.853087725317848	-0.280684410394459	0.705264369487918	0.902100542147327	0.466537093832947	0.497429324152111	0.709316649388617	-0.890789489840884	0.145773325880621	0.239549375607403	-0.890789489837782	0.283628861767191	0.42510934282284	-0.890789489837782	0.283628861767191	0.427786821223008	-0.890789489837782	0.283628861767191	0.441826083838063	-0.890789489837782	0.283628861767191	0.429622464110848	-0.890789489837782	0.283628861767191	0.430727424635807	-0.890789489837782	0.283628861767191	0.432143468142329	-0.890789489840106	0.186064784211694	0.2884078184852	0.140417015261862	0.860029306329028	0.999999999999876	-0.882855446341696	0.331849731794611	0.481484299846465	-0.659893662892144	0.431820208621658	0.608692994965573	0.575346825468165	0.581795649150866	0.797628242024073	-2.32727817118389e-12
AGRN	-2.21321318423989	1.82262058045457e-12	2.03486476858739e-11	-2.9063705669059	2.31535537838244e-20	2.93810822976111e-19	-2.48917855126193	2.22369314943528e-15	2.59744295993754e-14	-2.28175776776157	3.67351513055057e-13	3.15292667512638e-12	-4.56824254628953	8.92888826810367e-76	3.9295838848185e-74	-3.60529631998113	1.70370799707367e-30	3.16245076525113e-29	-3.82531544392971	5.72794878087791e-34	1.30635580564549e-32	-3.2744415549463	2.24618415010447e-25	3.37436850599389e-24	-3.02550921980773	6.49819742300702e-22	7.24634918957938e-21	-3.31012873867743	6.48247931492989e-26	9.66581046083785e-25	-4.02690108192324	2.28230492339585e-37	5.09939658473107e-36	-4.41841822244962	9.52907090605896e-62	2.40943247682607e-60	-0.495596749416779	0.163449751075536	0.272843641825036	0.625390462460826	0.0785908714882602	0.13693375162438	-0.0988505909525346	0.781033977218618	0.953916104591969	-2.91190137208465	8.69861406170062e-15	9.38977222195046e-14	-2.49823251731058
AL645608.5	-2.26896642652846	3.69999152641808e-09	2.92905144517196e-08	-3.10431569077506	1.11094189011954e-15	1.00541799907862e-14	-2.66762532003506	3.90225660593133e-12	3.39280131224698e-11	-2.58937530334646	1.60892223395453e-11	1.18767580074901e-10	-4.15748525669246	4.35346079177774e-41	6.87322057594732e-40	-3.48705163429879	1.50197341444445e-19	1.46363738873733e-18	-3.96196542215898	9.23241955666904e-24	1.21457664186769e-22	-2.8033128232719	5.87991844978364e-13	3.84208152332006e-12	-2.56404281751324	3.76751660021428e-11	2.01319210004889e-10	-2.66151556526219	5.96129979044358e-12	3.53361674239156e-11	-3.78109274664135	1.16991916500757e-21	1.1690249900622e-20	-3.27356009034103	1.82189418056209e-23	1.34252368207112e-22	-1.10857986025489	0.0104307452992802	0.0235847817504061	0.210164489146263	0.626531108697936	0.804339059620534	-0.377482475788445	0.383255302476174	0.553001263044018	-2.13215223862072	3.44073627772853e-06	1.5322905586034e-05	-1.78645029880581
AL390719.1	1.18505115508731	0.0121721491993036	0.033023709822957	-1.10661460425297	0.0242139810294651	0.0514496575743791	-1.44535008096529	0.00342743764207047	0.00954553811087098	-0.590078614083898	0.219864110120992	0.368328540221047	-0.403460914911972	0.290590610327759	0.439257242105931	0.0816252509879653	0.863174323114861	0.995032820918549	0.14765608105784	0.757706664812145	0.919947404672403	0.909843988851468	0.0565167935552415	0.108208464462604	0.439819994606735	0.361545465883393	0.524083934450359	0.226131429742465	0.638786844215468	0.81979987937637	-1.23577258878346	0.0142070360570911	0.0293954812091906	-0.660566876826105	0.109802308547309	0.179672634767439	1.09597735089506	0.0404944242611387	0.0799875433357889	2.19544721681537	3.95443163279535e-05	0.000118065229036578	1.90670272852946	0.000377138017491125	0.00101588316478064	-0.2948121826982	0.612829615907701	0.820597912708906	-1.32017284205285
AL645608.8	2.3327390123622	0.00144491779108409	0.00489132733964734	-1.46095897270958	0.0851396358135783	0.158213653075572	-1.38001321720698	0.0998327450814253	0.190969441135955	-0.236503172907789	0.76105928770483	0.953868605165946	-0.12619425164735	0.839002755135758	0.997295706445666	0.882860880778644	0.235866280131288	0.363176711509766	1.35641228125508	0.0701927057123435	0.12691305051294	2.0734173689047	0.00574763899300362	0.0134191100443344	1.32693951875818	0.0845562498448373	0.150474064719733	0.370453485283044	0.63870394477308	0.819748521364842	-1.00724315971486	0.234345208115245	0.36692234885923	0.685441590454565	0.294103560100318	0.431368922816122	0.0118543410693708	0.989227061220734	0.999999999999876	2.88444801309245	0.000499013658995841	0.00128476230814804	2.81706446760034	0.000745354871307641	0.0019214771394894	-2.4602626687626	0.00837433050153442	0.0214196583225569	-3.05803210298236
RNF223	1.02045978748511	0.235304774525761	0.412372621290843	0.560205388768229	0.531455150506352	0.734957545825888	0.00122764996090606	0.998963630915765	0.999999999999893	1.42476412358654	0.0917376526579468	0.174099630115848	-0.159809634936546	0.83035621165543	0.991858552937915	-0.159809555462662	0.869177589894231	0.99835512076634	-0.159809555462663	0.869177589894231	0.999999999999901	0.313070077155982	0.739461358781435	0.917296174082174	-0.159809555462662	0.869177589894231	0.999999999999893	-0.159809555462663	0.86917758989423	0.999999999999893	-0.159809555462663	0.869177589894231	0.999999999999901	-0.159809615068068	0.843190136381858	0.983446736687828	-0.159809495857287	0.885436912301156	0.999999999999876	3.94255757399128	6.86608220298634e-06	2.24192152542557e-05	0.898035376123199	0.352224797376179	0.51449202229925	-5.96053725574619e-08	0.999999960422792	0.999999999999823	0.626716423603414
C1orf159	0.383672928388538	0.0259277328899707	0.0642355448552949	0.166766639031362	0.333853001332252	0.509511333715454	-0.0821396950544266	0.633295788682032	0.839648399291937	0.290546902218748	0.0909699752563874	0.172825803671245	-0.103362063217919	0.449419797874303	0.63302565573361	0.0839892000016535	0.622713451413563	0.799599643906039	-0.0778872938289633	0.652137024035119	0.827887472802089	0.418956232258039	0.015009163569689	0.0323503216752023	0.190053578751718	0.272512987133952	0.415355445703617	0.492640407715079	0.00409951826578951	0.00957567840187405	0.411580138378595	0.016800939720006	0.0342627258463681	-0.439671966869291	0.00290350901628243	0.00612279292328934	0.306218229531009	0.115642347206977	0.202518060741513	0.257007581189719	0.194276476009671	0.303594735709593	0.0816173780394429	0.682125855591793	0.862075619270153	-1.84474278795001	5.99194708631355e-18	8.5202168728535e-17	-1.618083758785
AL390719.3	0.548335969925009	0.466900033017955	0.692593796623198	0.809447335067013	0.274198023355939	0.433366693587172	-0.0872775095076952	0.91093193285743	0.999999999999893	-0.0401151500953398	0.959111539906012	0.999999999999901	0.613842127625927	0.312452333684052	0.467436999336187	0.79487897605025	0.275021914601056	0.414219514158396	1.51600436312964	0.0332863225105369	0.0648577813100056	1.28024650992167	0.0937900673104327	0.169711851494691	0.433793561326666	0.589784990368061	0.771777585952633	-1.05594324351107	0.233732664983711	0.365626714436386	0.881806117414676	0.248840406767776	0.386128087399039	0.134646937928941	0.83941622600543	0.980512804609784	2.21882088577083	0.00429845548550733	0.0104986292688563	1.83582170938334	0.022092980656433	0.0435592757132222	-0.410220288628434	0.644850831349297	0.825990318345676	-1.20795253246674	0.200532004513111	0.34766682438471	-1.3309847748307
AL390719.2	-3.55521765498892	1.62344528233265e-08	1.18746802108311e-07	-3.7767452658451	2.62503005124972e-08	1.25798076747675e-07	-3.77283415746798	2.70885303679363e-08	1.58422794229319e-07	-3.71073559692853	1.19026512829056e-08	6.63784817279219e-08	-3.15142533083603	2.64651279512189e-13	1.26722915860039e-12	-3.36189465479625	3.68648493169416e-08	1.54864381763649e-07	-3.5618371841629	1.43285246611959e-08	6.37873848183351e-08	-3.14227268485721	1.07512224117438e-06	4.07417847021767e-06	-3.93247560130003	3.58994658105775e-08	1.49040522630889e-07	-3.23439552769967	5.47687877481449e-07	2.10402832373058e-06	-3.93247560130003	3.58994658105777e-08	1.42856602472448e-07	-3.93247560130222	4.30704070688623e-13	1.92356543537592e-12	-2.51090014217897	5.80184935730445e-05	0.000195398631832718	-3.64249977164707	2.63994201065167e-07	1.00675861541839e-06	-3.27404355508743	4.04312116881542e-06	1.38891431262285e-05	0.476919816798434	0.472972752910808	0.690414521917424	-1.31301457366529
TTLL10-AS1	1.67383100278735	1.79422761893564e-05	8.61495527908751e-05	-0.18865465976412	0.667774643284024	0.865641087457876	-1.28218863671263	0.0098787019142439	0.0248602076918039	-1.60874949736372	0.00143558155945175	0.00407842760177128	-3.06065630572424	2.31242809195025e-11	9.91604254811611e-11	-3.06065622841628	9.93731151184811e-06	3.26494308064001e-05	-3.06065622841628	9.93731151184807e-06	3.30649036843188e-05	-3.06065622841628	9.93731151184795e-06	3.38107009116932e-05	-3.06065622841628	9.93731151184799e-06	3.2444621501601e-05	-3.06065622841628	9.93731151184811e-06	3.34670457639505e-05	-3.06065622841628	9.93731151184807e-06	3.15376964809491e-05	-3.06065628639724	6.11833180613585e-09	2.11861775368218e-08	-3.06065617043534	0.000211460155276439	0.000653180333563192	-2.01454910207323	0.00120387900612983	0.00293560305963557	-2.4864905073885	0.000236163456318433	0.000653551317792722	-5.79809415658173e-08	0.999999954040053	0.999999999999823	-5.79809400441897e-08
TTLL10	2.7125816808345	7.28373804924288e-13	8.41432952389548e-12	0.84520495804281	0.0315085292610002	0.0652957149828265	0.0496483329362589	0.902312625893609	0.999999999999893	0.416862561363329	0.290748104134081	0.464992095674303	-3.95455151505781	3.67363099084043e-18	2.27100941425272e-17	-3.95455138697726	1.31314328034707e-08	5.74847781902522e-08	-3.81855032589373	7.14186974521204e-09	3.26010819274457e-08	-3.95455138697726	1.31314328034707e-08	5.99817562797249e-08	-3.95455138697726	1.31314328034707e-08	5.6683678272644e-08	-3.95455138697726	1.31314328034705e-08	5.88119362223887e-08	-3.95455138697726	1.31314328034707e-08	5.4384143750196e-08	-3.95455148303767	5.37989734860225e-14	2.5310755329058e-13	-3.83580751536064	5.87909504393023e-07	2.62244713400467e-06	-3.1857302265933	1.42140485650055e-06	5.00745681231159e-06	-2.47039606461423	6.05458826589912e-05	0.000181071177691628	-0.570280029191575	0.554534578632477	0.776272815637219	-0.570280029191582
TNFRSF18	2.38081281582736	0.00603615254531869	0.0177132222018525	2.59516956577088	0.00273332502174535	0.0070016485531078	1.04793831922333	0.228969107586105	0.383457907361726	0.84211021275741	0.333955729409304	0.520037358315615	1.1723036455744	0.0891671429131877	0.153958305589358	3.21097585163656	0.000201821347616496	0.000563081327041916	3.3161486163542	0.000126010366029363	0.000365240543827575	1.39216894138716	0.112293538221128	0.199265419089165	1.01210046487443	0.250952730836675	0.387166181544583	2.0449934082976	0.0187300039376125	0.0386454615183454	-0.749884788455976	0.408266320328551	0.58464575394285	-1.77268691300189	0.0223288484141408	0.041634152742161	2.67491291337117	0.0063289908020128	0.014942106477659	5.16699624781979	1.21976979273228e-07	4.80110513659592e-07	4.50166119033093	4.14037595500278e-06	1.4203450684194e-05	0.283601936611911	0.820852225646111	0.992007485425981	-0.750103291377295
TNFRSF4	6.11715337074054	1.38621741685852e-15	2.05914314843226e-14	7.61089601434495	2.33517160674564e-23	3.5825961348908e-22	6.41915471353683	4.79175805841612e-17	6.37241766344037e-16	6.41886068027078	4.86299807673911e-17	5.68619303761423e-16	5.60092189389829	9.82108138879188e-19	6.23879343906178e-18	6.40962980901833	5.08617021325136e-17	4.20785551095618e-16	6.76510374249617	9.22084485384236e-19	8.86583041373318e-18	5.05623112418717	5.37342646472075e-11	3.01856646589173e-10	5.35743969699593	3.33400019080315e-12	1.93903185192032e-11	5.90123994066588	1.38382386614241e-14	1.00287953306181e-13	5.99931620872272	4.94081801440881e-15	3.29022838396197e-14	4.98264916316729	1.08698620937361e-13	5.03075057661845e-13	6.98045475945839	2.25854394060547e-16	2.62474108343058e-15	7.04013130665934	1.3841788611605e-16	1.13610610187786e-15	3.5197597481927	6.69129946545665e-05	0.000198701433776661	0.0627979735169899	0.957022479298819	0.999999999999823	-0.522702694526223
SDF4	0.842852786507487	4.54161364409428e-11	4.39885592999962e-10	0.934678270301754	2.67299686647419e-13	2.00404335743887e-12	1.05585971321895	1.37854932496389e-16	1.77289775288101e-15	1.01888178715899	1.54009528353538e-15	1.61498003794617e-14	0.952175465642733	3.72089463915443e-21	2.65148552790983e-20	1.16465321287592	6.57844509288875e-20	6.57341715509827e-19	1.13871499167538	4.85097287682316e-19	4.74148537018725e-18	1.21680742719213	1.67265414574656e-21	1.97730447195011e-20	1.25004226110403	1.33178137592085e-22	1.55140214190809e-21	1.44147256607512	1.40584518232271e-29	2.5719561919976e-28	1.34653589903881	5.21956070801745e-26	6.65838106880085e-25	1.99701697337383	3.07822891803115e-76	1.11039873064534e-74	1.34798081393052	1.13847122459294e-20	1.85996818195917e-19	1.87650552796087	1.51008640944121e-38	4.49924076755432e-37	2.04726399634403	1.35417867593417e-45	6.2778365600626e-44	-0.154331752201075	0.311691934140372	0.497523305962539	-0.130171280893067
B3GALT6	0.653582116348792	0.0448711171891728	0.103611329259665	0.727819206658105	0.0254567501918182	0.053851374339827	0.773120095688598	0.0175120127999627	0.0414997716666752	0.614753827568973	0.0590934577735335	0.118337604826614	0.353629774334739	0.168399615974739	0.272542932352423	0.714471292069856	0.0279895574377401	0.0547422011860997	0.745699779721218	0.0220072454434512	0.0445290703072767	0.981871095947933	0.00256347498228854	0.00635945306519532	0.836778526659422	0.0102096871192283	0.0220468567063309	1.22043028821324	0.000175802138953944	0.00050583941266781	0.807839329540082	0.0131164314764201	0.0273012538644091	2.12656277383369	1.0689711534096e-14	5.2182277624658e-14	1.18518111345148	0.00130688202473806	0.00351784996146073	0.461700770060439	0.2124335755419	0.327979959519566	0.124526866319722	0.737211673693859	0.915556218795307	0.628962405937441	0.106949537372887	0.204724046556836	0.652345377574443
C1QTNF12	-1.65741427767033	0.000311875923459277	0.00120183414883716	-2.21003791767048	2.55522714535005e-06	9.8796261451537e-06	-1.45963856536743	0.00125951869353707	0.00380262588051966	-1.5934952948	0.000431359068441241	0.00134058029024787	-1.30543324019853	0.000264906550038174	0.00065542892403878	-1.61188702425329	0.000334095781605433	0.000904174512901401	-1.49121965121875	0.0011063291798219	0.00280926306643175	-1.48792097515264	0.00184860238096678	0.00468744786782546	-2.0752817945106	3.13141150432101e-05	9.63826710299155e-05	-1.44284549809007	0.00209228201363228	0.00513685683357319	-0.748183328733156	0.0979648105516747	0.170339747692889	-2.74184066681947	2.15717839501599e-11	8.77177494933599e-11	-1.7017090387951	0.00120256557372359	0.00325835309473599	-2.05742827501679	0.000227077839713655	0.000614580660319458	-2.64882892404712	3.62863592173014e-06	1.25226027280874e-05	0.224244247258807	0.678005892520329	0.884502867932911	0.696982161432539
AL162741.1	-0.140251825279622	0.750181330424086	0.948484127974159	-0.891704426786776	0.0585068216697271	0.113219605737877	-0.52867382974894	0.240251169800559	0.399041649362483	-0.731412022714183	0.105630893589798	0.197043562774682	0.471597101080211	0.170105945679728	0.275034794479427	0.184967659964504	0.658096535284909	0.832917417617397	0.0685919670154373	0.872371341735771	0.999999999999901	0.468318674623843	0.306310555156467	0.470324447085209	-0.378108817682317	0.436934300950748	0.611014700672325	0.111960917371658	0.807809321916173	0.957144729710143	-0.249479307951749	0.593177101479521	0.782379166458593	-3.45505179285832	1.04627702322481e-10	4.07362746911466e-10	-0.0179949813215958	0.971102883824794	0.999999999999876	-0.148576094935464	0.778198365177381	0.931582077906011	-1.65312286049047	0.00659154254016354	0.014673911154176	1.09793208682444	0.0598117382452819	0.123522366086319	0.534567975677136
UBE2J2	0.0575107055475377	0.673387560676775	0.885340076434273	-0.01339358705166	0.921796662070338	0.999999999999901	0.110962463663421	0.414545720556583	0.616888643226264	-0.108654335383569	0.425637062145309	0.629986175854385	-0.156396620624338	0.145839413112268	0.239634884206583	-0.0508794994218655	0.707626416191622	0.877962773941658	-0.0585204207752126	0.667584999580614	0.843152096677787	0.190226232761482	0.162696586973885	0.27506367963399	0.123229817663831	0.366349291212073	0.529909099702504	0.396526473055647	0.00353528789568156	0.00834147823817732	-0.270889153777417	0.0474276807543557	0.088576471994535	0.0986679675376311	0.392460741546704	0.550749978286904	0.211376544706878	0.170434604063583	0.282973739752303	-0.443254250139028	0.0045177634950749	0.0100876782831902	-0.343009800744553	0.0277598310152033	0.0549624275239073	-0.39515791098878	0.0159027728784768	0.0382757200886889	-0.213166029309267
LINC01786	-0.217129988752545	0.550220733495798	0.775936732390166	-1.14138277195908	0.00315017193735594	0.00797982232982799	-1.52992917639779	0.000115843361661225	0.000419195706287983	-1.1491845827496	0.00232256716617045	0.00634563917137323	-0.122191888587906	0.672399582745263	0.862778617667048	-0.252419782052481	0.473522504418206	0.647584295219866	-0.68834623200863	0.0655179672653382	0.119281167878291	-1.17570253919443	0.00719740323902903	0.0164793859460194	-1.3022934303234	0.00320342095521361	0.00751623937931071	-0.441849121871524	0.256402175225263	0.395431439195395	-0.241544492669811	0.520429564101896	0.707155598435422	-4.005581454463	1.51044147411159e-18	8.97229872130608e-18	-2.15719428099401	1.33675901995992e-05	4.94388033627065e-05	0.458314892954172	0.275545266683209	0.410688787515661	-2.23155720661756	1.13275850384687e-05	3.68939138340162e-05	0.0763769190661358	0.876196265530229	0.999999999999823	0.0164967799439854
SCNN1D	-0.727625722622439	0.0101131426353014	0.028046411005914	-1.58831466213466	3.02164556486745e-08	1.43963420574543e-07	-1.77723398130511	5.26621832791761e-10	3.70620314594524e-09	-1.53186082089641	7.27911798160826e-08	3.7252726843455e-07	-1.01830486579374	5.01580686763544e-06	1.46684946145008e-05	-1.41118492917169	5.26635261135749e-07	1.98341073551227e-06	-1.60042191847991	2.51963908718256e-08	1.09341079720357e-07	-2.274116560554	8.44236141358423e-14	5.87093658222125e-13	-2.32635361618656	3.04196638429927e-14	2.05569908576745e-13	-1.34989742205711	2.76275159210063e-06	9.89491977830444e-06	-1.77983889388211	9.93370679317441e-10	4.48751586389826e-09	-7.53173564069435	7.39195905622837e-63	1.92380862467493e-61	-2.44521138296669	4.05660017834899e-13	3.54714386451421e-12	-0.261156000301799	0.418778300783762	0.578005137520272	-1.21164152437817	0.000300014276384087	0.000819433476132558	0.776630972244004	0.028098152154582	0.0635180136545746	1.15812779178744
ACAP3	-0.33661559818913	0.0945025252292446	0.196065345408197	-0.287862019419105	0.152511358257996	0.26317893596654	-0.205191669502498	0.30673138259536	0.486962099874202	-0.22869591039409	0.255204372866473	0.417046759523999	-0.0470295468718345	0.766259254687124	0.941326004486371	0.107446630963927	0.591531853599667	0.770378546541117	0.199283177648781	0.320582005144681	0.473844633937228	0.158166148999681	0.430939004558665	0.618555758877798	0.000326655876940719	0.998703570118888	0.999999999999893	0.274604224123837	0.171023202354226	0.280108977136943	-0.380427081102019	0.0587192520817678	0.107555241809662	-0.631512725425358	0.00021034191861608	0.000505431361684774	0.080463599900657	0.72361247339925	0.904846114458012	0.126941526523559	0.577888622622787	0.753526717832341	-0.155906476815193	0.495162901990852	0.672939678077639	-1.49792283651286	4.48850487492103e-10	3.13319794261334e-09	-1.64916182211702
MIR6726	0.0814370201023638	0.809143350376426	0.98462979937655	0.168832738385744	0.612879550441358	0.815293412877683	0.268729444458369	0.411008030093264	0.61262775922235	-0.318497513987253	0.348011563107322	0.537478475852958	1.26035237129863	9.31987291557594e-07	2.88794735212843e-06	0.904163995605944	0.00322943950515973	0.00754820628059005	1.05729504949983	0.000775129876848103	0.00201522936325773	1.50543996706296	3.08473011477247e-06	1.11091162776868e-05	0.998351230792917	0.00323748093145819	0.00759102982027652	1.32598962212942	3.70511456732289e-05	0.000116206425082419	0.32066749396793	0.354045732852902	0.519607228012544	0.394946376994665	0.171384680589479	0.268197643466034	0.114041071065124	0.765732438769487	0.943792745130122	0.656640438443094	0.0907116706637124	0.155695142259828	0.888822335591314	0.0260268309570613	0.0517946585900313	-1.03729974718011	0.00399519082012716	0.0109175534403764	-1.68762613025663
PUSL1	-0.970996278030775	4.34045112473363e-07	2.65513972777833e-06	-1.32944718728259	5.43192556136672e-12	3.66929947186137e-11	-0.442281169335905	0.0199685953220832	0.0466058865175772	-1.0478468618921	4.51002840418582e-08	2.36414828777287e-07	-0.87371936568286	6.56938421118397e-09	2.38808209750315e-08	-0.662638310774516	0.000471940209088886	0.00125050195739794	-0.602987582221689	0.00157401551624145	0.00390282766487659	-0.275568844789284	0.148309541952277	0.253881289293562	-0.291523338844194	0.12671009508249	0.215178485814337	-0.223764049682515	0.239412685566121	0.373238845811448	-0.701886085256733	0.000245927854189128	0.000663336014870676	-0.327141667624162	0.0424233894794463	0.0755317086260296	-0.240763546432402	0.264046993647757	0.409822685185385	-0.757336587453927	0.000571746254213861	0.00145939450298005	-0.570520966035757	0.00918337564286142	0.0199180205618552	-2.29510742310046	2.46635331407413e-23	5.44916424213843e-22	-2.58455383362764
INTS11	-0.30858974766743	0.00517461621292643	0.01543822055517	-1.03045604777216	1.34576346971166e-20	1.73688944291254e-19	-0.644163220864165	5.17565818179753e-09	3.2684834964381e-08	-0.827654661320849	6.8788463960474e-14	6.28661320075574e-13	-1.07629176770455	3.96168850274514e-35	5.06006065867044e-34	-0.978313211880868	6.16042674625656e-19	5.76064803782464e-18	-1.07678008762822	2.15360458982606e-22	2.59145061750389e-21	-0.928884362735089	4.74246384716255e-17	4.16347012121223e-16	-1.05902995396407	1.27127779489504e-21	1.3923336238687e-20	-0.893142694758918	6.31610420503376e-16	5.01856710400638e-15	-1.05289442748273	1.84727024126322e-21	1.82624163868027e-20	-1.09603897812042	1.16855631945722e-31	1.15953572404448e-30	-0.700901654908756	2.16510216327523e-08	1.15109977074572e-07	-1.10271277202677	2.25309075533863e-18	2.08752547117016e-17	-1.06138473391519	3.65732512310219e-17	3.26192330088875e-16	-1.42621795633805	4.67338925539309e-27	1.34772215053116e-25	-1.57417340667106
MIR6727	0.0388766135599576	0.876656547760282	0.999999999999893	-0.685690009056989	0.00707400739137106	0.0167962970373923	-0.16149105801012	0.515887831506781	0.726923206026722	-0.473630040489617	0.0587801619523795	0.117816059257581	-0.311291194023779	0.118422772230027	0.19869967045821	-0.389931269636384	0.114430674807863	0.193692876775168	-0.489825626914428	0.0529687442683233	0.0984801701318935	0.225387355993297	0.370142708889343	0.54756587199999	-0.0929384128221217	0.716000063020982	0.878371509594134	0.285874295744689	0.25157790951681	0.389083774083932	-0.140378428386389	0.578419551192948	0.767708087303311	-0.584285404253792	0.00671451747150853	0.0135074456570552	-0.759361113971571	0.00903390733247578	0.0206812489608357	-0.587108765694344	0.0543344116343562	0.0985222647826133	-0.397475714689508	0.190494822169468	0.305096912544895	-2.29000356606753	9.9579150512691e-14	9.81072975912056e-13	-2.23746397025287
AL139287.1	0.324308877785451	0.244887223504601	0.42524523652672	-1.73978373800197	6.90803352927729e-09	3.4990817372956e-08	-1.40515976593319	1.42399636462137e-06	6.77394927246926e-06	-1.98484508932132	3.11686603964513e-11	2.24063250015981e-10	0.224728846551618	0.309141779129446	0.46333833706115	-0.170364554195883	0.537165295426352	0.715091967847068	-0.0667964569936754	0.811776551892044	0.963113586399339	-0.350981603787663	0.226521610573776	0.36512928584756	-0.893483646191079	0.00301310828027656	0.00709911695523088	-0.624542480634313	0.0319908627745582	0.0629043993207262	-0.91782277739598	0.00180320836059727	0.00432349928263552	-4.91049514041014	2.80419432621127e-42	3.95382031863296e-41	-1.1215535400392	0.000728833569867569	0.00205217684880819	-1.58660596138856	1.2396082411447e-05	3.92555244319936e-05	-2.51684571468915	2.84621611740322e-09	1.34267658930027e-08	1.8443336747267	1.0299337298898e-06	4.90977692994294e-06	1.4209013579504
CPTP	0.425320777113559	0.0226816095197807	0.0571327888277013	1.39712272236549	2.72380953359016e-14	2.21480649803928e-13	1.28854305265965	1.90322203749797e-12	1.70269885199416e-11	1.37407183228125	6.55485672367481e-14	6.01095894396818e-13	1.29511304280895	7.79798418952519e-19	4.98690254724337e-18	1.541837109742	2.30345004066982e-17	1.94969009304149e-16	1.53931098102349	4.07266054216334e-17	3.51860704422338e-16	1.90745413703697	1.73863536087619e-25	2.63068527718687e-24	1.88863882848958	5.77481645944523e-25	7.73419350991819e-24	2.0812167219597	3.41812910350631e-30	6.41741512171413e-29	1.98749836463306	1.37314215494754e-27	1.89023919923953e-26	2.28385548091384	7.27369647117074e-49	1.25986194076236e-47	1.28994561123809	4.79415177360796e-10	3.06494080694457e-09	2.44559539600569	1.80551850747767e-32	3.95328392696475e-31	2.34796674723662	5.27305272778292e-30	1.07713802525753e-28	0.141068581660607	0.513629074742376	0.737254143353053	0.204638146324963
TAS1R3	1.88993820471037	0.000310983435507206	0.0011987860733682	1.89394592744631	0.00029565737510911	0.00088136033808794	1.47654261573297	0.00505080525905172	0.013568294359749	1.21937445071957	0.0210382102923892	0.0472658653324853	2.30432515917165	5.92537981811972e-08	2.00994436951854e-07	2.16531372589996	2.55676143933208e-05	7.99419695590527e-05	1.59701854865283	0.00255378913752665	0.00612526983089928	2.10898280055569	8.24553331798793e-05	0.000251029758443596	1.9072472631351	0.00042613822611282	0.00113741844940035	2.40776023571903	4.59530907163875e-06	1.60446902666124e-05	1.67306679104229	0.00179152667162524	0.00429655526457748	1.96800722961788	1.54201577427379e-05	4.13167553189453e-05	3.46289303579647	1.26998550698324e-09	7.76338998028645e-09	4.28916546727681	6.1190812701526e-14	4.1387720142674e-13	4.08146859851357	1.15244408915976e-12	7.27324951480315e-12	0.486555820220036	0.462714325543325	0.67832238273446	1.01314364587537
DVL1	-1.19800163353975	6.2171956213921e-06	3.21209307194246e-05	-1.44951301634072	4.64604215239369e-08	2.16849669083114e-07	-1.25417039663094	2.17920701887473e-06	1.01158806948296e-05	-1.00270192482088	0.00015306098670335	0.000513846839461528	-1.99533412781903	1.23680013905771e-21	9.02109777325961e-21	-1.75643104799229	3.23967033485785e-11	1.76478122869458e-10	-1.70485635938411	1.31543176100808e-10	6.99938186945814e-10	-1.57439835910849	2.99846934641454e-09	1.44986962908947e-08	-1.58591674744427	2.34212396871434e-09	1.07904915546825e-08	-1.32127539877771	6.17559024767682e-07	2.35901954172335e-06	-1.91965520725928	5.06348956227797e-13	2.93899904722909e-12	-2.65457499337618	4.5901257977703e-32	4.62730118217793e-31	-0.294700844725635	0.325765276881491	0.488373093358789	-0.262311852168693	0.382159932889196	0.538135307684811	-0.272128993533584	0.364573241199468	0.529853947488971	-2.80096695417785	1.08850445816146e-18	1.64694699199785e-17	-2.73950292079233
MIR6808	-0.276282851546317	0.359374235781663	0.572210226029542	-0.54554911466951	0.0729407882530762	0.137750763404288	-0.120645934857564	0.681401373502591	0.880711321863406	-0.39456064403416	0.182756818742383	0.315101781901386	-0.399013388646833	0.0988184123603667	0.168809247295798	-0.286884635601622	0.322899386139987	0.474284517224352	-0.399803742442728	0.185837797236953	0.298096320052746	0.140827054385907	0.648590004616794	0.837651696524581	-0.314464722138734	0.329917546078739	0.486918550400593	-0.0327776129888484	0.915065265309879	0.999999999999893	-0.592363432750968	0.0627520518736478	0.114185412476827	-2.08499200192555	1.32936331882883e-11	5.47239979236e-11	0.052950617459656	0.874383466677662	0.999999999999876	0.339763153458262	0.332476763027558	0.482177903429564	0.640755097646514	0.0655211297260003	0.119438189903949	-3.43655586285646	4.13407913640141e-23	8.93327978802349e-22	-3.45305371954538
MXRA8	0.391142436285023	0.382832894035653	0.599956121543432	-0.182133390629319	0.684853575302652	0.881213241522579	-0.979878295584735	0.0292583178737236	0.0654050996829814	0.878281661032386	0.0497394243208154	0.101593766527501	0.0351244298728898	0.920760185329115	0.999999999999831	-0.212452586991456	0.635133491066474	0.811948316904742	-0.00207760384297117	0.996303463421816	0.999999999999901	-2.06595533060658	6.52503342433564e-06	2.26717024734512e-05	-1.56727907798996	0.000567610087133177	0.00149056024493606	-2.5677791155952	2.58322039400496e-08	1.12567879844661e-07	-0.15385048718753	0.731841662332143	0.91080091154333	4.52320524307229	5.28397467183859e-33	5.48498014408562e-32	2.83542009956628	2.15396247139018e-08	1.14565830000028e-07	-0.154000427583863	0.763099925881446	0.919587709430056	-0.248011944796264	0.62773465746007	0.808908392864372	0.270063344341788	0.614399580360242	0.821876290331899	0.0922092177361474
AURKAIP1	-0.50525049471309	0.0148038618999707	0.0392616935921014	-0.475931674652061	0.0216449704278207	0.0464975643709463	-0.0981848675242003	0.635161862299938	0.84108636053597	-0.280344407558161	0.175804004040187	0.304863491214769	-1.08371172748638	3.17371729947133e-11	1.35076005513732e-10	-0.803689025774803	0.00010262611608448	0.000297764702096601	-0.802215230635506	0.000108978545734722	0.000318546086943363	-0.64028755349134	0.00201548060550044	0.00508129688486334	-0.762043010667517	0.000240139373655366	0.000663166535712279	-0.394251300351852	0.0569635595031034	0.105803226653354	-0.689448464653257	0.000882193604021141	0.0022105336030725	0.0738039320411275	0.673245640629096	0.845769532811639	0.383522663516978	0.101930544008719	0.181505123332974	-0.322586095575215	0.170053416828284	0.270775070988562	-0.600754749910685	0.0106989105924601	0.0228972428173814	-0.678222828808713	0.00621973092876831	0.0163359149225593	-0.809246485430084
NDUFB4P8	0.743047361086132	0.222020417289324	0.394003247858434	0.509699377048872	0.415200249051069	0.606928612575466	0.691552144044906	0.260059461760537	0.425980608751734	0.0705464028410938	0.913485311180969	0.999999999999901	0.0592262948159303	0.910008869485442	0.999999999999831	0.676395639803414	0.263832381944085	0.399635628989549	0.874228864055052	0.148597940926706	0.245630405838148	-0.13881489335935	0.847180887058147	0.999999999999901	0.920594159708337	0.161361535283364	0.265379668622667	0.325577856552363	0.634169227108961	0.815964956651756	-0.461438252050683	0.521578547239765	0.708318895722323	-0.313354388338278	0.593176815692126	0.769204040545458	-1.03974446521446	0.252413033126412	0.394449396023335	0.421637597236852	0.561890428733176	0.736244232568068	-0.0203443038140151	0.977717485113055	0.999999999999922	-0.574141905479653	0.561326238287589	0.781150351107437	-0.0741733767599546
CCNL2	0.602569490271848	0.00839835227161463	0.0237282712036761	-0.835018356848195	0.000264286711497706	0.000792827354745954	-0.443248515637239	0.0526262273564232	0.109752984619663	-0.755976464817813	0.000954382908296288	0.00279203897326981	-0.119667216847842	0.506102070522998	0.695851697130357	-0.14565306804121	0.523935641290264	0.701456886776838	-0.125043748381285	0.584501913095847	0.763368645637557	-0.804212865745341	0.000442127239409874	0.00122505561644941	-0.943857593896318	3.75296898765648e-05	0.000114410452449131	-0.626709192792253	0.00615602999955329	0.013944609908918	-0.455142705487505	0.0466249458788558	0.0872524471738903	-2.19566048395469	1.03996779544389e-29	9.66603211012133e-29	-0.910543041605414	0.000450774513134576	0.00131569421347474	-0.538060448450406	0.0381582569527458	0.0715949498091972	-0.949158311005323	0.000257864136218993	0.000710340385457394	1.87850643827887	6.68911799050035e-12	5.57469771554808e-11	1.77577281382619
MRPL20-AS1	0.521704615462838	0.00104819001908183	0.00364846746233648	0.411104505882065	0.00983772504566505	0.0227465357121531	0.305902978018075	0.054166369290274	0.112557486634026	0.229946185537513	0.148844921534321	0.264582199293709	0.02454046541243	0.84543309495105	0.999453738256584	0.00511066465075663	0.974282932438346	0.999999999999901	-0.148600037204027	0.352196893609336	0.511773688776698	0.211068829982769	0.185885328060908	0.308584061714208	0.141496102587673	0.375993455997996	0.54097660384933	0.316015198171202	0.0470425246942174	0.0891462165114434	0.20902575203461	0.189920559090828	0.305622994175005	0.193327688247402	0.152372971303165	0.241313217588138	0.415948900664845	0.0209312786135586	0.044236585572621	-0.00371261598591093	0.983766250622622	0.999999999999913	-0.304536466833019	0.0973579102058076	0.169399034447342	-0.776947367105803	4.74624327639205e-05	0.00017984782099064	-0.732214316009593
MRPL20	-0.33371641239927	0.056353136302015	0.126123050293674	-1.01434311640791	7.37142029244037e-09	3.7232715235065e-08	-0.604785989941012	0.000537010629625449	0.00173566685676479	-0.932968622998629	1.00515367145498e-07	5.0621862102334e-07	-0.802853335924227	5.59892302616363e-09	2.04581754943459e-08	-0.922771097568085	1.23332495443588e-07	4.93993773461346e-07	-0.966073678702354	3.47900834010181e-08	1.49431779822185e-07	-0.901802225560095	2.69302330374112e-07	1.08684812507817e-06	-0.928762683051903	1.20038658832988e-07	4.74221470878467e-07	-0.774947057753766	9.49492606607123e-06	3.20800960291114e-05	-0.949306735533444	6.10740243234261e-08	2.3840653474799e-07	-0.382235367778089	0.00971697081678424	0.0191205883901956	0.373583369822823	0.0587027139532751	0.111400541474729	-0.898596450417513	6.65158267443063e-06	2.17489995346367e-05	-0.821491243035132	3.76991587576607e-05	0.000115581737001062	-0.53913722349947	0.0104559874194701	0.0261757103043886	-0.803990406517751
RN7SL657P	1.21666686944095	0.00486156451208237	0.0146103653681916	-0.379378555835293	0.412292205532878	0.603370571133355	0.200656892741444	0.651422217666099	0.854756424885932	-0.593971019703549	0.197101713762793	0.335872096376778	2.13039061484813	4.98395909838954e-10	1.9568659708197e-09	2.0541738007887	9.16600428874513e-07	3.35899337469294e-06	1.9939707449103	2.5848004458579e-06	9.15936942110351e-06	0.948894697137073	0.0362322733785168	0.0725140157277201	0.970212486397212	0.0323094398764301	0.0631679570979235	0.521223784938848	0.255152125590957	0.393812153456626	1.58422614678584	0.000245553002174145	0.000662509642153489	-1.52837312062153	0.000426551746239603	0.000991145416686899	0.545903850825901	0.275125537719958	0.424454976951535	0.301669806668774	0.569689038368541	0.744600553722981	0.229925817766673	0.674522117255303	0.854735808095714	0.933375911683358	0.0978770773563384	0.18949217193661	-0.432444604851257
MRPL20-DT	0.118387554294375	0.765937098631092	0.959620473915522	-1.65376236971743	4.71419045314464e-05	0.000156212861206991	-1.80212394833963	8.95674581775975e-06	3.84382485866737e-05	-2.30394372684355	1.85531338051064e-08	1.01409123339482e-07	-1.65455166514097	2.36873379975261e-07	7.69795727991805e-07	-1.75956033591247	1.20003263169156e-05	3.90430310013557e-05	-2.4458131605894	4.69850330427482e-09	2.17994149566167e-08	-2.55654117844218	5.74059643715446e-09	2.70679278150378e-08	-2.39314400708183	3.73076249065275e-08	1.54642004011025e-07	-1.8671717369689	7.37065676278576e-06	2.51875651814882e-05	-1.37821723611912	0.000727510145663824	0.00184511342086699	-3.76560852481136	4.02522351723705e-23	2.92862333363005e-22	-1.09812877083674	0.0163129025022437	0.0353341570493813	-1.83304021419932	0.000137266665751342	0.000382813429157785	-2.45571043095503	1.14983691335048e-06	4.19871693703039e-06	0.166154058547364	0.739604083209699	0.94257392116693	0.357831705160736
ANKRD65	-2.77517519355364	0.000101048783234922	0.00042717391924718	-2.8417488590832	6.98483361009955e-05	0.000226337993181501	-2.66862506463173	0.000165272473307348	0.000583873743296626	-2.53095112053168	0.000314945619550682	0.00100288752909783	-4.9995076594198	1.31382646650215e-16	7.49756364488106e-16	-4.43644362281471	6.77355233925334e-09	3.04090067105988e-08	-4.31504182338719	3.17311877144786e-08	1.36742337934296e-07	-5.32619939599584	6.91018368109402e-10	3.5353391349081e-09	-5.80273885712776	9.02052255891779e-11	4.67525152639455e-10	-2.73570578013279	0.000204525257562698	0.000583016087833515	-5.80273885712776	9.02052255891774e-11	4.43174626998302e-10	-3.6526251322893	2.77937926328354e-09	9.84711033006352e-09	-1.55927452243582	0.0478938494097004	0.092864927151749	-0.65330597942132	0.406938532333632	0.565070420210359	-1.36556970532424	0.0898589611095748	0.15782541068199	-5.09778974446166	1.12250985046968e-07	6.03780435056208e-07	-5.44517885143137
AL391244.1	-1.50275035642351	0.00474104747149037	0.014286352348226	-2.76560816893418	2.11684709846515e-05	7.33354183872053e-05	-2.05642153016105	0.00024348858423364	0.000836972074912272	-2.2957469483716	6.97174314125435e-05	0.000245018985013003	-2.93369507389845	1.00391997005028e-10	4.13760772805787e-10	-2.72660501475537	1.14452437092968e-05	3.73274523968323e-05	-2.93369507389651	1.95792037857587e-05	6.2888766582238e-05	-2.93369507389651	1.95792037857588e-05	6.44727586608923e-05	-2.93369507389651	1.95792037857588e-05	6.16739696737724e-05	-2.93369507389651	1.95792037857588e-05	6.36388116168641e-05	-2.93369507389651	1.95792037857586e-05	6.01756671153505e-05	-2.58473735429953	1.91059728832523e-07	5.95801430112182e-07	-2.50000776489047	0.000409315105511972	0.00120468228927007	-2.93369507389506	0.000344650802950977	0.000908940795987291	-2.93369507389505	0.000344650802950981	0.000933472071196749	-0.502451386378156	0.594897078328771	0.809085376281705	-0.224795649961844
TMEM88B	-2.33207375575014	9.30231686824762e-06	4.66617332383363e-05	-2.44369246480477	3.7445544892123e-06	1.42211929266441e-05	-3.06733072973211	8.53221962347021e-07	4.17827553756855e-06	-1.39771066625525	0.00132539230554514	0.0037878531251409	-3.23209340158849	3.61394809275618e-14	1.81433972845722e-13	-3.23209330844379	1.02500692693461e-06	3.73757425573707e-06	-3.23209330844379	1.02500692693463e-06	3.79507539813308e-06	-3.23209330844379	1.02500692693462e-06	3.89525179327584e-06	-3.23209330844379	1.02500692693462e-06	3.7062348597375e-06	-3.23209330844379	1.02500692693462e-06	3.8317705134228e-06	-3.23209330844379	1.02500692693462e-06	3.58049249542233e-06	-3.23209337830232	7.1521102445485e-11	2.81122060881182e-10	-3.23209323858531	4.59294467673739e-05	0.000157320624981768	-3.2320932385853	4.59294467673741e-05	0.000135867581920083	-3.1577052637419	2.88738015552312e-06	1.00861580270814e-05	-6.28603689207112	1.08778481381751e-20	1.92592545915659e-19	-6.28603689207112
LINC01770	-1.49579289717353	0.0067405051674672	0.0195182518602126	-0.862067130428	0.111391532413751	0.2003382671955	-0.360957339667585	0.499415157718745	0.709734763535616	-0.0114450212882529	0.982810420797663	0.999999999999901	-2.75793553944865	1.3154560352756e-09	5.01497988469472e-09	-2.66198723364898	2.9382880852166e-06	1.02092953272649e-05	-2.6426398271358	6.77630601672441e-06	2.29239982479201e-05	-3.5615089425979	6.73894838589365e-08	2.87361733313499e-07	-2.35077548729165	0.000123029120159562	0.000352769609625908	-2.92015153994254	2.61901622521601e-06	9.40008125754339e-06	-5.10660772742503	1.27341087105183e-11	6.68388715987309e-11	-5.1940792252156	3.10684052583626e-18	1.81465857769004e-17	-2.94542533093597	1.34896491756678e-05	4.98647377673797e-05	-5.09963445765375	2.1512929572908e-10	1.09505505304903e-09	-3.20299951728544	6.06340075650013e-06	2.03950036618283e-05	-1.3555527857655	0.061634361365838	0.126810175312825	-4.0222314926835
VWA1	-2.04209524793657	8.27462364526501e-05	0.000355108928074301	-0.314294979084618	0.542797629889395	0.746863970606431	-1.34392595159846	0.0093255268416112	0.0236046464160963	0.632520138822416	0.220197911000141	0.36879833629284	-1.74896969484834	1.75234891574288e-05	4.8788476166758e-05	-1.37312348970778	0.00783886604891556	0.0171129825518635	-1.23741702863112	0.0167238031383909	0.0346354638529512	-1.59723408693783	0.00205506054825839	0.00517245662630225	-1.2916292402772	0.0126088310007533	0.0267566644197028	-0.0899132510510744	0.861726940822303	0.999788660009411	-2.3381661529635	6.81535040347609e-06	2.19991288580908e-05	-2.04895024949317	2.91080949453168e-06	8.27788520748227e-06	0.246417214985906	0.673635280491544	0.857486705881869	-5.49680463013638	9.7900629245441e-18	8.69435330983601e-17	-3.81650796278069	3.25214741527899e-10	1.67202094524813e-09	-6.0155745320788	1.36567188755092e-21	2.5773169377644e-20	-8.79015824991993
ATAD3C	-0.349630977876766	0.122865003328137	0.243321669362703	-1.00902962234002	1.1081227041659e-05	3.97915667497714e-05	-0.340285411641828	0.129268503690183	0.237903000304406	-0.818572076842257	0.000305572022560396	0.000976058864719626	-1.20783784665077	3.20136133379135e-11	1.36170619413525e-10	-0.797939837223763	0.000366555743622839	0.000986009063352476	-0.686018744021531	0.00255019314498302	0.00611725146297052	-0.650244390137869	0.00483409467584139	0.0114347022862824	-1.06545258443724	6.41341565441459e-06	2.13963214399027e-05	-0.550108929449811	0.0158966093038759	0.0332490361319139	-1.66844959714418	3.47501467813027e-12	1.90090337018202e-11	-1.1015693308216	1.56595116382623e-08	5.28164375620293e-08	-0.1226482945219	0.630202447582796	0.817740594918867	-1.5807623878804	3.19951546336186e-08	1.32788738670568e-07	-1.29369362544758	4.59181048457489e-06	1.56783411791337e-05	-3.32236783579859	8.83662604874282e-33	3.72028257276706e-31	-3.66684622390917
ATAD3B	-0.489135130708997	0.0769321198729462	0.164741944169652	-0.952078202229009	0.000581559074101058	0.0016574416479992	-0.3676878699629	0.183262311087474	0.319296411551097	-0.96856241114673	0.000464069886088425	0.00143312388915701	-1.89820511140173	3.23382712935888e-18	2.00438176016134e-17	-1.29787766668779	2.648825451874e-06	9.25739712329319e-06	-1.09243506331123	7.88999373505674e-05	0.000235057379408696	-1.16988235705159	2.39594286716664e-05	7.8041171849338e-05	-1.49757771438878	6.66997095401074e-08	2.69543517798447e-07	-1.04537133860329	0.000158040240309192	0.000457603704271502	-1.77413477997931	1.61396712684276e-10	7.76531050594437e-10	-2.29252064129294	1.64544702615197e-22	1.16601805074147e-21	0.543630107138455	0.0824444651097985	0.15066872514527	-1.90836429886038	1.57656573526266e-09	7.39620433675542e-09	-2.21700735733119	2.7463404325674e-12	1.6812122782792e-11	-2.23417070478436	1.56773363288622e-11	1.25730108007888e-10	-2.30729444950726
AL645728.2	0.888997587782496	0.0364096763437589	0.0865045710416527	0.851023494290601	0.0447118615533626	0.0892337189091844	0.856801877081193	0.0417884213789653	0.0896154565160115	1.2388327180911	0.0026375652901775	0.00713613433535189	1.16429052448244	0.000667582221316379	0.0015816184974445	1.08815029972679	0.00802190239837835	0.0174778616663704	0.775996041847119	0.0697645377497743	0.126200216318381	0.972165115590185	0.0307013325588428	0.062326488159682	1.2533659228155	0.00447489593559462	0.0102641866227874	1.07034534740803	0.0144084155782774	0.0303898163364481	2.12282678939517	2.39850902586538e-07	8.85807582136099e-07	0.967451231702835	0.00891656285556604	0.017641543963708	2.35988337978975	1.7200567459887e-07	8.20823461390217e-07	1.45075274277967	0.00271764960080913	0.00628952175547259	2.5061771822138	8.51160690858815e-08	3.50140245112345e-07	-2.08360940735082	0.00239609620623008	0.00683191866322751	-2.13620788333951
ATAD3A	-0.269794541100324	0.228151709017027	0.402494856544566	-0.827261507865107	0.000224285726585205	0.000679232044832288	-0.200829775277951	0.369118162447463	0.563889739643957	-0.722747915570351	0.00125317550100966	0.00359548389741045	-1.37550651731168	6.70148221945103e-15	3.49407209527422e-14	-0.908081918861428	4.87877291813796e-05	0.00014749133327235	-0.790260566562818	0.000419148132653218	0.00113062246254582	-0.807811372200672	0.000314318924244044	0.000888479478902423	-1.10516814075864	8.58854896632758e-07	3.12724340956152e-06	-0.634841796579806	0.00458109428846111	0.0106040648259929	-1.85066108201182	2.17372513961068e-16	1.57692870693443e-15	-0.915133948191679	1.37369882809155e-06	4.00993376642793e-06	0.341652078691634	0.177505029917259	0.293157050017178	-1.62781188726103	2.2209453745328e-10	1.12940404919407e-09	-1.58218294880783	6.80296481942676e-10	3.39774235382307e-09	-2.73774599104269	2.19943777266064e-24	5.27117412821768e-23	-2.73348760949369
TMEM240	-3.42128767536747	2.20925133299183e-14	2.9521472479925e-13	-4.42476290972307	4.28742678174766e-20	5.33974499777238e-19	-4.19362414423129	4.99952023407673e-19	7.67508408505306e-18	-3.91413912612129	5.44190807378797e-18	6.87135001966446e-17	-3.58848398662151	2.9700115417812e-24	2.42214201029697e-23	-3.6549118925769	1.14217709549113e-16	9.19850669905425e-16	-3.56258622410086	4.60919471412188e-15	3.45782530871926e-14	-3.58804731403323	5.29567958341804e-13	3.4720508062982e-12	-5.04643621286949	1.80351603782143e-19	1.72350166050113e-18	-3.92654352488329	1.27662501397045e-15	9.93475054117336e-15	-3.93478564114408	7.56732874889098e-16	5.3082133638356e-15	-3.82554623965608	4.12001946283517e-22	2.86939639321714e-21	-2.64666187519736	7.65650820428223e-08	3.79758607887648e-07	-4.20194300185141	1.18575970850253e-13	7.82991519834057e-13	-6.88040747491902	2.04653766909774e-20	2.29310364892839e-19	-3.77881537296787	6.59024073018831e-13	6.04472235673602e-12	-2.74318650792682
SSU72	-0.520435978504147	0.0012671817535718	0.00434319144488979	-0.851609134571882	1.35556874402899e-07	6.02305828028035e-07	-0.567847735428436	0.000429303977136527	0.00141199219941499	-1.04669498348286	9.34257241836806e-11	6.43222680890575e-10	-0.720229996998035	1.42358096216411e-08	5.04855791259274e-08	-0.868652113146792	6.94778577180949e-08	2.84842140130299e-07	-0.836274064250324	2.21724757524768e-07	8.81885520123794e-07	-0.519586126912659	0.00128389059382606	0.0033316688855291	-0.663410685213933	3.99961547301663e-05	0.000121545185344111	-0.399322601086256	0.0132665060599472	0.028177605519502	-0.665426222538153	3.74207704413773e-05	0.000111325641362899	0.308553478211225	0.0234999045311117	0.0436473582544624	-0.341931326559525	0.0614293660795779	0.116074755604458	-0.603674441456484	0.000987119789811342	0.00243548809204311	-0.528919000872436	0.00388042449858359	0.00898618227316104	-0.0923884917639778	0.632599350082084	0.838669956132221	0.0160454572288721
AL645728.1	2.43789273013611	6.62535400150472e-07	3.94257806713377e-06	0.840689534901975	0.0956036341484025	0.175228652419698	1.56551122085427	0.00153117467840278	0.00453923046841422	0.410358429111136	0.417580763222999	0.620896758964318	2.73707846975473	3.90392499631995e-12	1.75015601677651e-11	2.80223646960567	7.70337360206229e-09	3.43854656503238e-08	2.55466602984987	1.82756028580591e-07	7.32553643563882e-07	2.67677649495676	5.54714734936657e-08	2.38411513754695e-07	1.87870736189746	0.000187144827850636	0.000524327415965628	2.07908148032863	2.84895601710659e-05	9.07542450720827e-05	1.77107384705243	0.000384224923234085	0.00101205794644233	1.91491386183067	6.3459412936952e-06	1.75712942299758e-05	2.61375392477508	1.98963811398032e-06	8.27928780877884e-06	2.96639385616994	8.90593518944366e-08	3.55270042304107e-07	3.34546854479685	1.39214734496726e-09	6.76833780531779e-09	3.21095851147805	4.39924028585328e-07	2.19529804968151e-06	4.56530461558635
FNDC10	-2.63557830266753	3.54422902717606e-13	4.23652135435359e-12	-1.91462806385335	9.73093099127059e-08	4.38771742021563e-07	-1.21057000682653	0.000697572873391349	0.00220380215492156	-1.93731088874004	6.56302146047599e-08	3.37414217353178e-07	-0.785401472235983	0.00516069743713003	0.0109628562581947	-0.34783501587574	0.328165368798695	0.480501964007	-0.447954643128344	0.208912070062315	0.32984214260475	0.137775035927248	0.698875946897774	0.880995354035609	0.00262389351824302	0.994125593220111	0.999999999999893	0.521269341685154	0.142856627635923	0.239558327226316	0.211172767623874	0.553117786733657	0.741429509176911	-0.901176043437557	0.00283303516147505	0.00598539541081534	-2.9101352768121	1.76462735020617e-12	1.44380156346594e-11	-0.400069339666467	0.32379706614814	0.471637463822372	-0.34196038403826	0.398943933241128	0.571434877600834	-1.77796628386133	3.39361275472225e-05	0.00013141833554256	-1.56494052395291
AL691432.4	-0.335253902998381	0.356345062982251	0.568479288756927	1.16225411180036	0.000581836887426414	0.00165805882342769	0.784885655599437	0.0208446530855788	0.0484089910424527	1.35533282905841	4.84025291146199e-05	0.000173576658081511	2.1750270823301	5.20716712813328e-16	2.87576187039606e-15	1.89068395265475	7.96859673581617e-09	3.55169013085447e-08	2.01734632965773	1.17081373582117e-09	5.74749064774484e-09	2.06167014022016	8.26501019031531e-10	4.20535750432442e-09	2.35696785129128	1.54173495923588e-12	9.1675395606024e-12	2.11382840897964	2.2693099543952e-10	1.18069604929801e-09	2.47454435490214	6.67094354267465e-14	4.1076063135158e-13	-1.11365513526089	0.00105924642053898	0.0023539532345159	-1.31861156404902	0.00346057678716753	0.00860860961990309	1.38302321786584	0.000460987071459888	0.00119350500082033	1.309205382121	0.00111080986871401	0.00279201375748071	-0.370114729813998	0.423471310383562	0.632702248500389	-0.693374432792778
AL691432.2	-0.291027851651516	0.189147670599905	0.346190419571688	-0.634595353435432	0.00441423757583361	0.0108805051850089	-0.957893236850133	1.79040404732324e-05	7.36443746967123e-05	-1.28955346535756	1.20453758295218e-08	6.7120258610927e-08	-0.00191818387067811	0.991170507454657	0.999999999999831	-0.323053654258469	0.134305535367023	0.222893872777556	-0.259420555141839	0.238165021074097	0.368723205774277	-0.00537460548784792	0.980679815211256	0.999999999999901	-0.00962449116365932	0.965480841288151	0.999999999999893	0.186951489495964	0.392579273368095	0.562936893208934	0.246797051299075	0.258448941276967	0.399079089488005	1.0609963748589	6.13832034421089e-09	2.12510337106367e-08	0.330496285185928	0.177987098624118	0.293856258864164	0.384951091141628	0.127643906461108	0.21071071466338	0.577563315500058	0.0216788212506407	0.0438496309058993	0.799850021995948	0.00279161071338168	0.00786657014066756	1.14029837613549
MIB2	-0.492254511858921	0.0382408335715666	0.0902018503655293	-0.266904122908061	0.260730697458075	0.415562636841498	-0.619120902376315	0.00906465622731107	0.0230047368081176	-0.15657564312686	0.50908845474277	0.721920022903142	-0.527304213716796	0.00477021306884493	0.0101875520532969	-0.683871608525561	0.00389095490169865	0.00897597221898368	-0.739652666257493	0.0018468200286585	0.00452816793787307	-0.676142538465053	0.00444757948977454	0.0105887765852379	-0.461036484156804	0.0523141815208584	0.0976243429265907	-0.0167325006568855	0.943722224094132	0.999999999999893	0.175277816559308	0.459536176191935	0.6426465293707	-0.458993749183376	0.0222186046479437	0.0414407988141621	-0.727943911772082	0.00688160143116606	0.0161279771440461	0.342704263033811	0.202401498452869	0.314450715381624	-0.426712418877532	0.1137610489117	0.194457265326287	-0.755102166743603	0.00770801053156963	0.0198789743109715	-0.803043402523943
MMP23B	-3.09074841496074	0.00044624295148271	0.00166950564701321	-3.22898199355995	0.000245731987467458	0.000739964730438456	-3.42975988560477	9.9065256417454e-05	0.000362025802057193	-1.58933178155878	0.0682344668424077	0.134240518324703	-4.32407514744069	5.73499892982299e-10	2.24214728375289e-09	-2.92469354280492	0.000830688880402969	0.00212114195585583	-3.51388964249917	7.36669679437374e-05	0.000220390391511065	-1.88535792869373	0.0315954936186715	0.0639832885174361	-2.78371235304358	0.00169038499430285	0.00414153091161222	-1.49982461972767	0.0860621455740776	0.153205862840878	-2.50223175376904	0.00442081849097813	0.00995383787302575	0.986412550086782	0.179305288292673	0.278973332527227	-1.34858030663113	0.172647948057461	0.286245064239309	-7.11667827269405	8.43635104330153e-11	4.4568411148264e-10	-7.58585167970261	1.29389022992093e-10	6.88253906276275e-10	-3.95015068836583	0.000178405413356662	0.000618157156218636	-4.28325416772402
CDK11B	-0.334286042419181	0.0762216003312121	0.163457562756865	-0.876335039385493	3.43331967833454e-06	1.31008892324743e-05	-0.603144441581529	0.00137054257186665	0.00410502310996544	-0.800083216760793	2.21890424221369e-05	8.32571012322392e-05	-0.83307383507427	1.99189119698338e-08	6.99634825864388e-08	-0.76049091247136	5.34165863006911e-05	0.000160691575194237	-0.802275557844792	2.10012503597321e-05	6.72198427612862e-05	-0.63593643124873	0.00074746878118317	0.0020059532511608	-0.72177378324555	0.000131003141369965	0.000374135150477209	-0.350767740310192	0.062629824298952	0.115271576481964	-0.843840333008996	7.72995008537781e-06	2.4808975283969e-05	-2.96417556437052	2.22932262524145e-75	7.87351978228581e-74	-2.72298811229472	2.54562031795854e-36	1.10098622223167e-34	-1.76869905699639	2.43445659489538e-16	1.96116157208257e-15	-1.73393122293943	9.02138598456182e-16	7.24832320308091e-15	-0.739627881036944	0.00108967568109495	0.00331335758917813	-0.950200443406736
FO704657.1	0.988445164335891	9.00223006607048e-05	0.000383616005079812	0.99168845783409	8.4379872073253e-05	0.00027072411963915	0.657865008914056	0.00906815075801459	0.0230098967209033	0.817642098179189	0.00118714041013024	0.00341920470730754	1.13072845736558	1.39559926549065e-08	4.9535819939571e-08	1.20946487960774	1.41084040202332e-06	5.07183284535332e-06	1.23900329266904	8.51159244542919e-07	3.18037433464195e-06	0.720474652814903	0.00442901431453271	0.0105502885427139	1.30562809117427	2.23217872697325e-07	8.58363941110677e-07	0.870736594468445	0.000558887918958725	0.00149212618707134	1.30413643100738	2.23699669701642e-07	8.2824524473613e-07	-1.64259907667004	1.68085019563004e-13	7.68861443351508e-13	-1.20555459094015	4.61594386232613e-05	0.000158044275859498	-0.283543413900284	0.338077506561139	0.488726376211035	-0.59803386608902	0.0465877321859669	0.0877542663339247	1.49482278989809	2.24476516991659e-06	1.02559214944724e-05	1.49085195935514
SLC35E2B	0.556154806636724	0.00515380042075288	0.015380003188774	0.656246192787957	0.000959922845960354	0.00264071586826889	0.465876719947204	0.0190563290294255	0.044710863476033	0.609298628685264	0.0021687378400518	0.00595393618256672	0.560016366339229	0.000345958574727761	0.000844738126613709	0.732089641950783	0.000226376514475806	0.000626423610476411	0.644940365478361	0.00117109874808807	0.00296423838319629	0.344844108962976	0.082853023886735	0.152083228644672	0.7464944118068	0.000172567026109861	0.000485702711812639	0.221160177123453	0.265964052636805	0.408165820480986	0.606773513952828	0.0022622621944561	0.00533998971026325	-1.08246189233719	1.38079341118703e-10	5.33096989655272e-10	-0.563762130680915	0.0125345892001248	0.0278532166037491	0.264299450642031	0.241272273615853	0.366462386550017	-0.12549737041295	0.578347360555875	0.758062467201432	-0.281865030040798	0.236572999068862	0.399392378735376	-0.256429039738114
AL691432.1	0.690176639645058	0.16099559354437	0.303760538914179	-0.29300396665404	0.556455972152274	0.760874148201429	-0.132164926010991	0.789526718587577	0.965226015958009	-0.363937248761699	0.463153251604068	0.671902001435188	0.534798733839254	0.170305123311909	0.275347841827905	0.932162018185568	0.055935044205759	0.102502022705807	0.91747179418499	0.0616724685932958	0.113041655233356	0.0475118499114214	0.924918946035493	0.999999999999901	0.0439635185253848	0.930584594638142	0.999999999999893	-0.272969584994516	0.589286414078206	0.776504193868897	-0.272445434687624	0.588373034533547	0.777463090021068	-1.9268826306096	1.93224344419598e-05	5.13379506215242e-05	0.091853319764619	0.870132286869243	0.999999999999876	0.680492824008577	0.229292421653414	0.350704438518393	-0.362272271797803	0.537577150381672	0.715870945281441	-0.56631218007945	0.348211149813183	0.543480921319191	1.03503345817665
MMP23A	-3.16799566310236	0.000645538824540784	0.00233790672811723	-3.0336625962595	0.00106661667916037	0.00291203570499067	-3.20621147724244	0.000544548307089143	0.00175786430547187	-1.3456848079426	0.141985079888264	0.254228763304522	-3.78597057586315	2.27635280800327e-07	7.40892084387655e-07	-2.56320465703488	0.00532352575227222	0.0120003220660172	-3.22626813307061	0.000540409706218962	0.00143507019756971	-1.83493946836971	0.0471570807235822	0.0919661935914305	-2.26240566435269	0.014936287559865	0.031235408866006	-1.1856353302859	0.196839394707099	0.316068478067144	-2.35834813977252	0.0108496941390555	0.0229108425376678	1.19679789617074	0.121222963351551	0.196494101517128	-1.14629892722137	0.270316022369115	0.418283692908836	-4.8665838172525	8.99576839542185e-06	2.89549897327281e-05	-7.14538002364517	5.14936054151793e-09	2.3757068506898e-08	-3.51207067666459	0.00153324030076584	0.00453595992279552	-4.26284213870204
CDK11A	-0.187269666082407	0.389102668944216	0.607082929479387	-0.735038072853122	0.000734672782471006	0.00206140832934715	-0.583957189718264	0.00722527806541952	0.0187713375853163	-0.688635179593007	0.00155101437340563	0.00437859458913047	-0.72243960510327	2.45154143039421e-05	6.72791240841681e-05	-0.610479751731217	0.00492768072434152	0.0111662856456913	-0.648466419690414	0.00287127273788457	0.00683254998768645	-0.389319183486518	0.0734592850642753	0.136686771412632	-0.436500611132598	0.0448465144709182	0.0849132116427274	0.229166197315096	0.29127690412329	0.440402250818509	-0.524900869413226	0.0158156829363301	0.0324105922761744	-2.96990464154319	3.49600663839504e-57	7.75553010110185e-56	-2.54347789064127	2.03258099737259e-24	4.38051477416732e-23	-1.49916087095073	1.63586911045163e-09	7.66122909889814e-09	-1.44513003064684	6.06922972889648e-09	2.78446817623325e-08	-0.575172962544701	0.0276833562747639	0.0626643042146359	-0.540226000234423
AL031282.2	-0.123626092177311	0.526851810946802	0.753440676748936	-0.662052299309068	0.000712894950864265	0.00200481759538149	-0.590077625943077	0.00252022042279605	0.00719685011365074	-0.593196019155728	0.00240817927795272	0.00655843126969974	-0.655746651755787	2.02602259064133e-05	5.60549899330778e-05	-0.505716766861251	0.009507900673976	0.0204320603865944	-0.574797840844536	0.00326897275939054	0.00771253081451487	-0.407260201574961	0.0371912903542667	0.0742735648710652	-0.45751828143427	0.0193016860326298	0.0394937946427849	0.139525985297721	0.474537325250172	0.652986472641645	-0.513866052348165	0.00856303584415216	0.0184146764865819	-2.59269561187428	2.91321345945762e-54	5.93494001881298e-53	-2.4367877674845	1.67040311894535e-27	4.38792719720467e-26	-1.24574316457919	2.36329839114642e-08	9.93172217081115e-08	-1.29507910889834	6.57379753351602e-09	3.00291952785868e-08	-0.518238644413267	0.0273261266539089	0.061917985549513	-0.494376000633828
AL031282.1	0.266868803099866	0.365193469034463	0.578938950121855	-0.339942134376991	0.250657336735354	0.40198413121703	-0.192667296353098	0.513187612471832	0.724252136187503	-0.246421723461768	0.403641748794629	0.604968623220529	-0.370180949503714	0.112580101761031	0.189803296839663	0.156370310004396	0.593565065063932	0.772429074182171	-0.199539041108733	0.499475178872003	0.677579023713483	0.798206334785839	0.00659181038645996	0.015214507291928	-0.203621343397567	0.492933653318544	0.672773966535916	0.612029879424007	0.037204428323774	0.0721972549802857	0.029257401002267	0.921120440381754	0.999999999999901	-0.168389162916408	0.500845760360996	0.671924833229398	-0.551643417822102	0.101086641562753	0.180218038882962	0.830943514754178	0.0129219013257723	0.026683208372312	0.680665580700488	0.0421535165854531	0.0801364054974309	-0.792552471966859	0.0269336609792561	0.0611342724365539	-0.229635854808519
SLC35E2A	0.531541017102695	0.0300449050385211	0.0731902005726688	0.771996236537271	0.00159307235906925	0.00423229839769645	0.502251290468964	0.0397994330611268	0.0858803078666323	0.726810768142471	0.00293397109433887	0.00786511877383255	0.646112375118251	0.000818957607120614	0.00192104089099108	0.917873198874499	0.000161650479800786	0.000457335282454288	0.864418005018843	0.000400372964774879	0.00108281568964862	0.583552030677599	0.0172222027006569	0.0367080683515697	0.799490249594708	0.00109084827019683	0.00275287956722341	0.654964170621942	0.00740001579845546	0.0165149081674214	0.810355375784029	0.000919112379314936	0.00229837243029197	0.113440156493135	0.585477038633196	0.761578787687604	0.0960146266381894	0.729957584201451	0.910958574020321	1.14732762600023	3.51850174191122e-05	0.000105824810188412	0.959179961766758	0.000557092456501693	0.00146220886385662	-1.12879970899563	0.000123766087127697	0.000439871992901289	-0.983446311759383
NADK	0.148910958553404	0.521878839480125	0.748481623163792	-0.109393685491149	0.63804449094641	0.838063205781938	0.0399397156064412	0.863552166891114	0.999999999999893	-0.322033637426795	0.166140194186079	0.290647702193888	0.906392766293706	7.18649351623594e-07	2.24698756225044e-06	0.73563329693764	0.00153259174729873	0.00377129212494055	0.68241344403753	0.00330700448015042	0.00779427634565953	0.64408517196357	0.00556943360687203	0.0130351370168967	0.960196308061952	3.57288287245736e-05	0.000109244784935121	0.771148747856868	0.0009006033453161	0.00233361493267672	1.92978372648203	9.3598692505488e-17	6.94531301206929e-16	1.28062283579047	6.96637475518913e-11	2.74012904513287e-10	0.351461589306633	0.182164480969127	0.29968823463253	1.61453511394729	8.60404286805479e-10	4.13804357607952e-09	1.01029949068487	0.00012482984339949	0.000358676272375752	0.709546189855576	0.0106245440002919	0.0265568623633076	0.659939085771316
GNB1	-0.342549953989677	0.0382073307933566	0.090140829322035	-0.278779059199774	0.0915941022468695	0.168858626776471	0.144888590229788	0.380465484056515	0.577285367800899	-0.208200787267839	0.207623310399238	0.350945642390885	0.0865287936636353	0.505686664035554	0.695396412150437	0.189644779248367	0.25083541506786	0.382729127624439	0.0908881615318073	0.582214444912363	0.761133434510181	0.426822373722716	0.00977321416128516	0.021829417214935	0.262723253225729	0.111772560369968	0.192770836255291	0.206740174146437	0.210736676446652	0.33505783861698	-0.543540123888149	0.00100410061553939	0.00249634368481714	-0.356056571911024	0.0107948360289594	0.0211086975105281	-0.912851534438122	1.11391362301701e-06	4.78785278378338e-06	-1.51284199121573	7.5557377396654e-16	5.88979026604084e-15	-1.30162762119169	3.95348576748972e-12	2.39274606706312e-11	-0.564788897347796	0.00426689514355422	0.0115836394193144	0.066978583058194
AL109917.1	0.945455258783963	0.249091545397503	0.430969794518418	1.52264294189953	0.0566843320807377	0.110044997220433	1.58657063077675	0.0465389669267867	0.0985061245113869	1.48301117869634	0.0623347742075331	0.124077032044317	1.53797509730776	0.0189120486057712	0.0369954341572635	1.40968677432797	0.0761758773680239	0.135114979316641	1.31687538247125	0.104591974714941	0.1807583991742	1.45787558078524	0.0826036432771379	0.151706064628308	1.34348129657978	0.109467085073975	0.189250693468483	1.48522763084418	0.0737675670632208	0.133548925546733	1.58255443340161	0.051264301992823	0.095077374445933	1.44772877539173	0.0378431177946995	0.0679309046512494	0.601917656247433	0.517711177584176	0.709031917250626	3.05096843177799	0.000428518275190577	0.00111445742776323	0.405376057019334	0.667670899430098	0.848275238853446	2.34520063304122	0.0185248148485925	0.043836122583056	2.97696936414027
CALML6	-2.11099064420275	0.000106101537563461	0.000446389782313091	-2.29470933119261	3.47618766987554e-05	0.000117017137198949	-3.95506853542433	2.90932724433824e-09	1.89372869010343e-08	-2.59797186416762	2.51261997732768e-06	1.0670087451784e-05	-0.00372384939702791	0.992298868090435	0.999999999999831	-0.455802816930698	0.34497641680958	0.500691416194	-0.644506896839388	0.193924217956932	0.30938971620154	-1.90800304677013	0.000685746091693481	0.00185026749740566	-1.7906019378928	0.00197678094379491	0.00479152306250207	-0.623016557676173	0.226645574951727	0.356381512732423	-1.44967058064038	0.00724517692105309	0.0157756096147867	-4.45530844758558	7.90865107374065e-15	3.89215374871897e-14	-2.85048781725208	1.65264162005461e-05	6.03850281287683e-05	-2.65109046355325	5.32676977951372e-05	0.000156414017290932	-3.38314234761621	3.19188317432164e-06	1.10862758344555e-05	-1.1987963175921	0.0657738579237052	0.134215721056722	-0.319645013256486
TMEM52	-3.22979299159769	4.03249730171986e-08	2.80039804530052e-07	-3.93552836572266	4.8297923013292e-11	2.99566025121422e-10	-2.75944413843095	2.05787458889074e-06	9.58467974318991e-06	-4.23209924615005	1.51659447471902e-12	1.22046622068845e-11	-6.64390491521152	2.75251870297893e-37	3.79715668718834e-36	-5.99924722364862	3.20415860377555e-20	3.26579781164001e-19	-5.32782743919629	7.72439048662884e-17	6.53351881464761e-16	-4.94870064630978	1.06512851647539e-13	7.35839213474207e-13	-4.80514531912334	2.73008405938519e-13	1.71331182028934e-12	-5.36768119793746	4.26345635003152e-16	3.43556614818217e-15	-6.48310393243559	3.97222596587903e-19	3.43244885043706e-18	-4.69318292393976	4.87630100181162e-19	2.9605027635789e-18	-5.80901329037648	1.07854072444902e-14	1.08855666660911e-13	-3.1125269677976	3.46122167880603e-06	1.16862777722901e-05	-2.30655263265762	0.000616857460652167	0.00160847625182291	-5.18764302188752	7.39999822619266e-13	6.75074770588379e-12	-5.13965611557441
CFAP74	-0.946716974940839	0.164127643873299	0.308523917133313	0.0961682816314328	0.883701080456764	0.999999999999901	0.363769330275728	0.575563520962537	0.786732277322396	0.209985673314464	0.746379696114472	0.941867347320664	-3.15543110173197	1.42659892937038e-07	4.70788106325782e-07	-3.05962488093801	0.000219619196142569	0.000608909232246488	-3.05868692868316	0.000147914333832868	0.000424456313133852	-1.80319993870969	0.0182584380102636	0.0387324221317581	-2.39904835066925	0.00278476461940449	0.00659566417603338	-3.24781035010971	0.000150666746408447	0.000437747109125815	-2.96202069875007	0.000339755795763643	0.000900696394392212	-0.148591865264101	0.793316409184959	0.948361961468665	-1.77620740485167	0.031219712496651	0.0633703482467792	0.482810119228571	0.51830649863501	0.689896327193045	-0.422170935363771	0.583710642217202	0.763810885854835	-2.24250350655602	0.0237070878677888	0.0546589081223515	-0.257022901039798
AL391845.2	-3.05842843518126	3.04984482750401e-05	0.000140854047826366	-2.12051194928705	0.000572942626108969	0.00163423277627037	-2.91898237495008	3.01864327409949e-05	0.000119834988098695	-2.70887568257414	5.6637026684387e-05	0.000201562811621194	-3.05842843518302	6.7767037887693e-10	2.63484671969339e-09	-2.91087113564694	3.16996455387415e-05	9.7937469096605e-05	-3.05842843518126	3.04984482750402e-05	9.5755165135244e-05	-3.05842843518126	3.04984482750402e-05	9.80258643352361e-05	-3.05842843518126	3.04984482750402e-05	9.40129992931397e-05	-3.05842843518126	3.04984482750397e-05	9.67381712906506e-05	-3.05842843518126	3.04984482750399e-05	9.17476018910763e-05	-3.05842843518258	6.04376542984656e-08	1.95686321416704e-07	-2.94035609850367	0.000282803093077333	0.000855708295614446	-2.72511645932494	0.000224470887597629	0.00060787448867629	-2.40095901196036	0.0010620327816502	0.00267747047381657	-2.574363113793	0.00294431684230276	0.00825453704551342	-2.574363113793
GABRD	-3.70091682678571	1.53330183665281e-08	1.12589116831912e-07	-2.88672639496751	4.21548933363513e-06	1.5899872556408e-05	-3.63355051699326	4.5714429134136e-08	2.60295623072467e-07	-3.04631293322088	1.01740282892204e-06	4.53509279795852e-06	-4.59480334991231	6.59932410637836e-18	4.02834589854394e-17	-4.80963744096622	4.22710284921506e-10	2.09957537863313e-09	-4.95567531340268	6.05996295475758e-10	3.04591217799759e-09	-4.45920172229532	5.76931210173917e-09	2.71900754381751e-08	-4.48851891962694	4.66333744299316e-09	2.0991239831777e-08	-4.95567531340268	6.05996295475748e-10	3.04299426059189e-09	-4.95567531340268	6.05996295475748e-10	2.78675337969848e-09	-3.6051866482412	4.67425164632916e-11	1.86168723560857e-10	-4.95567519491585	1.64662668240795e-07	7.86968528425338e-07	-3.73859472838328	5.99738879792223e-07	2.2041361541718e-06	-2.31705533130935	0.00129707993091737	0.00323025489648893	-6.98784222484405	1.34000714272648e-15	1.55676137237999e-14	-6.98784222484405
AL391845.1	-0.348244328520136	0.675322440343822	0.887034868217459	-0.348244328520136	0.675322440343822	0.872619200949666	-0.185231157962831	0.817253248593397	0.984283718003271	-0.348244328520137	0.675322440343822	0.88345112926283	-0.000134140662913965	0.999824518754508	0.999999999999831	0.00996033697412895	0.989546835918421	0.999999999999901	0.100844302182404	0.894598511687824	0.999999999999901	-0.348244328520136	0.675322440343822	0.860641578806326	0.343090639616872	0.657316773157857	0.82879414179833	-0.348244328520136	0.675322440343822	0.853083545876908	-0.348244328520136	0.675322440343822	0.860256291324372	-0.348244328521116	0.609606009473876	0.786180793863511	-0.348244328519157	0.716171913125063	0.897907736878932	-0.0169375413797397	0.983925702925445	0.999999999999913	-0.348244328519157	0.716171913125062	0.895526180270335	2.2772575631496	0.016251831259083	0.0390323242416769	2.41664789448176
PRKCZ	-3.51595325533445	2.56753699576625e-51	3.17494097039294e-49	-3.45835771660539	2.75354701551522e-50	1.63232021791076e-48	-3.08941798666683	1.82419675525083e-41	1.02217772393575e-39	-2.96989734803002	1.96331348108449e-38	8.22262883294372e-37	-1.37756847341468	9.10731787223468e-15	4.71715048825412e-14	-1.69474699805358	5.45569005672708e-14	3.64816277459302e-13	-1.73770228506084	1.70372369226978e-14	1.22603728304323e-13	-1.23352252531926	4.8935590994005e-08	2.11693913714273e-07	-1.19467138733896	1.28612195182183e-07	5.06566685885165e-07	-1.176563547311	1.87605768535191e-07	7.53245532366922e-07	-3.51080571528005	4.91784134745228e-51	1.96603916942404e-49	-2.88843316163319	2.53100844765909e-50	4.57315211702255e-49	-4.03118821470652	7.78805072514312e-51	6.90776912479156e-49	-4.26625260537842	2.82283101802663e-50	1.49005768202317e-48	-4.53179519033244	6.68678509526851e-53	4.22316663576993e-51	-1.7793152423175	4.83866771208067e-11	3.69545912232102e-10	-1.49607900773058
AL590822.2	-4.27245853487683	2.39641308484242e-19	4.788467211874e-18	-3.56963336641138	5.35343938174681e-16	4.95810689667314e-15	-2.43482072065232	3.61883030982763e-10	2.58886396100754e-09	-2.84141699154337	8.141461802476e-13	6.75054733923845e-12	-0.361363601307266	0.196721823363948	0.312787635973295	-0.641414205289826	0.0663829009737839	0.119525925743648	-0.607119145011235	0.0888042491426765	0.156185570963449	-0.00108030672564952	0.99758941770948	0.999999999999901	-0.0459692675291823	0.89806952281303	0.999999999999893	-0.206606924795116	0.563494484098713	0.749205948698798	-3.23351725723995	1.57351163367871e-12	8.81987001806955e-12	-3.71853780232573	5.82435685689596e-23	4.20919488262489e-22	-3.31903999508649	1.937626117268e-11	1.4282202348298e-10	-2.52619366224354	1.45654359983673e-07	5.6932516025321e-07	-2.10691939471565	6.05330782803115e-06	2.0362377501555e-05	-2.64023928887105	3.04022940354061e-10	2.15762194012992e-09	-2.38724576066295
PRKCZ-AS1	-2.1410877967664	8.78342004419555e-11	8.28479258441823e-10	-3.71417772069944	9.75497108697107e-23	1.43996709304258e-21	-2.90187590404045	2.95743476850858e-17	3.99372058776557e-16	-3.90000274406125	2.13910911378085e-25	4.29713974920768e-24	-0.630698133686397	0.00992970758460287	0.0202775727870189	-0.761975025591913	0.01252290789899	0.0263092561910029	-1.04384071518574	0.000881290432539675	0.00227024507898827	-0.792147406788014	0.0131802572949863	0.0287205994022422	-1.03122806969936	0.00149163036678543	0.00368476851981191	-0.44912694810031	0.149912972775961	0.24979502257639	-2.57182453281662	4.43635414211104e-13	2.58616243572352e-12	-3.22221896530528	1.44143262681864e-25	1.1512820819722e-24	-4.3874244598916	4.25375030961399e-20	6.66570043875959e-19	-5.26940704953456	3.40515641420258e-23	4.35918948322996e-22	-4.62131309660888	5.53078807734942e-18	5.23106482208922e-17	-1.34422620361271	0.000637194445823761	0.00201758090185966	-1.22237565264848
FAAP20	-1.16450394613564	2.90781347235317e-10	2.58431580420596e-09	-0.620232205372746	0.000757707639878584	0.00212073087217768	-1.06596872808721	7.12643336306802e-09	4.43519542518108e-08	-0.647301832177268	0.000437393328257122	0.00135694837490525	-1.08136440432264	9.01888287634047e-14	4.4228794581071e-13	-1.16106667065078	2.65810611379476e-10	1.34231722562474e-09	-1.24649342182903	1.43174081037742e-11	8.21074074930493e-11	-0.845817260247092	4.48351254506677e-06	1.58666290396163e-05	-0.813473655261041	1.03067311236469e-05	3.35973402862264e-05	-0.442420422832176	0.0161452678348744	0.0337293360185734	-1.48362883140589	1.0665024711247e-15	7.39640487967244e-15	-0.19043830849363	0.220613421536438	0.334957800375767	-1.72723163363673	1.99280411331441e-16	2.32551974937607e-15	-2.26463329764588	3.74463662998617e-26	5.68980394984078e-25	-2.62445013235356	7.97409935305406e-34	2.00545306847595e-32	-0.0300525475716983	0.891732664058566	0.999999999999823	-0.148991392151467
AL590822.1	1.41944184045208	0.00985388368559741	0.0273820756313057	1.75286538785049	0.00113395254124308	0.00308455751434244	0.266239886594827	0.659950191804862	0.862280013176064	1.31536246146092	0.0159398604245176	0.0367293320780827	-0.844567623929759	0.113476015553341	0.191138021571118	0.165461158907692	0.784633319616061	0.941436334436611	-0.0477495544579682	0.938185909940615	0.999999999999901	-0.65118700371325	0.368134918191896	0.545264410964713	0.00888432243642379	0.989508970237344	0.999999999999893	-0.753877388738258	0.298001951526914	0.448889256171333	-1.0913203735485	0.150289336803636	0.249064582178295	1.11255872101935	0.0306018937248483	0.0558388640145795	-0.0368628922430974	0.958201073328493	0.999999999999876	-1.09132002294664	0.217948615957328	0.335534343563989	-1.06737560239196	0.196774698060649	0.313767026625854	3.79239582071269	1.22676545134697e-05	5.07032283010558e-05	4.43260818226752
SKI	0.603230781418288	0.0457140313712879	0.10530032183574	0.79914024833639	0.00811090303753448	0.0190673427921784	0.487123734814814	0.106584906747996	0.20190693134645	0.304854628514867	0.312611675536448	0.493102180869488	1.44861151760533	1.07209706474308e-09	4.11222480419078e-09	1.12517612802406	0.000192199251777134	0.000538214155152673	1.2783462516155	2.27590644309555e-05	7.25485485152298e-05	0.432187687732599	0.152287221259987	0.259789453872527	0.706376344436753	0.0192873439271143	0.0394712878037042	0.786009615675241	0.00921057616280533	0.0201986994522951	-0.0969836337668043	0.748096933562781	0.918399435759521	-5.1934803571774	4.36490250612648e-87	2.02255125640697e-85	-1.45844447357595	2.11912255332295e-05	7.61981404583556e-05	-2.50525022830446	4.13976803569987e-13	2.6219374778944e-12	-2.43632168900602	1.72634756134081e-12	1.07459377051222e-11	0.455431181452733	0.206908052427038	0.35674671657256	0.502152069798838
AL590822.3	-1.0834793537153	0.0123537098466212	0.0334682376706152	-1.48271626400203	0.000630878262356395	0.00178872716634229	-1.7809889535304	4.03521502817438e-05	0.000156752839050882	-1.86216464884338	1.79176973985252e-05	6.81286571497294e-05	-3.61641081863389	1.52733987555471e-24	1.26075566153033e-23	-4.70258372287977	3.23231700057374e-24	4.23272523737828e-23	-4.02742513389369	2.7165583361464e-18	2.53781530309791e-17	-3.79507507802965	2.1398010904142e-15	1.66680512313375e-14	-4.21226728619384	1.26476311349283e-17	1.07471874783343e-16	-2.92112714044122	9.55294339554368e-11	5.12379229221411e-10	-4.28802186452004	3.74944886084932e-19	3.24400088974896e-18	-4.42510816781859	3.06609771322854e-29	2.80400116981171e-28	-2.31307520856938	3.4637359445589e-06	1.39557971875998e-05	-2.79182141686101	7.62247166527996e-08	3.05980193986971e-07	-4.31384560565104	6.0314274072974e-14	4.20867006376608e-13	0.985304124956779	0.0588569513658111	0.121758159396813	1.09969552787596
MORN1	-0.397188652524875	0.109142368088672	0.220870449893094	-1.49231094492791	4.44813525045323e-09	2.30399021811943e-08	-1.05728185912982	2.16127294547657e-05	8.76702877848664e-05	-1.6963083487621	2.20164333825198e-11	1.60488386379239e-10	-1.42452704226152	1.01626684445941e-12	4.70950839910428e-12	-1.54885016214749	4.85645042704137e-10	2.40008098287491e-09	-1.70734468655994	2.95612867266423e-11	1.65352465636895e-10	-0.985213759305513	0.000116542405230698	0.000348058638527169	-1.22459697107528	2.36073091709362e-06	8.23041156769883e-06	-1.11357546771331	1.23852540950012e-05	4.12582685250756e-05	-1.2126953739157	1.95421997749043e-06	6.64684875342037e-06	-0.569762284897204	0.00666357120782331	0.013411350635488	-0.239644562993164	0.390926305075276	0.565659635780419	0.416045438139073	0.138458256217582	0.226326079791505	0.281629758426381	0.318699118459221	0.471951397025104	0.0906179864590479	0.758954043882443	0.954481994702834	0.329503222377783
AL589739.1	-0.835429347775478	0.254592395458113	0.438479636280122	-0.344388336531776	0.61974214058036	0.82139101101478	-0.881868574737762	0.243343095126967	0.403255491475619	-0.922481648034515	0.222530484129452	0.371954149361757	-0.852009005773585	0.127368288287144	0.212384861962305	-0.463461861990087	0.514109085440477	0.691425750585457	-0.711470300058228	0.3307654307783	0.486059790480549	-1.04505807630886	0.18447746851024	0.306534087627006	-1.04505807630886	0.18447746851024	0.297645324999768	-1.04505807630886	0.18447746851024	0.298852903032182	-1.04505807630886	0.18447746851024	0.29800396006832	-1.04505841503588	0.097662422069969	0.161566963747163	0.234258944132899	0.747602893861004	0.927789663378691	-1.04505773758204	0.254783240109494	0.383831510854156	-1.04505773758204	0.254783240109492	0.389175555959701	-1.15486375541411	0.109930368113258	0.209572233375008	-0.62224147395835
AL513477.1	-2.82959739925561	2.0270726963957e-31	8.99087633423883e-30	-2.65461029478741	3.74149780153058e-28	7.56636593450831e-27	-3.46002614862745	6.39092304567319e-46	4.42651073179567e-44	-3.20203367914103	7.82113689557021e-40	3.55909553197947e-38	-3.40003028066002	1.52145338766043e-70	5.76789270110686e-69	-3.94988165940232	2.19961714090003e-59	1.41116816918776e-57	-3.79968421268725	2.78046952478909e-53	1.50447038392195e-51	-3.8215673943619	1.73466949652612e-51	8.74074662036021e-50	-3.72259968433558	3.03862841559545e-49	1.2989655245926e-47	-3.37367568858275	9.58411011332489e-43	3.25467008931077e-41	-3.52835275865599	3.17137316227514e-46	1.04147205688211e-44	-0.988093703245414	8.80410463509056e-07	2.61151928921097e-06	-2.76201064473883	8.43529521901524e-24	1.7408881893327e-22	-2.57347119347669	3.10821062900977e-20	3.25222208531043e-19	-2.45763219470191	1.24443381804205e-18	1.2340198467957e-17	-1.20402874873974	4.32055452557475e-05	0.000164774773231531	-1.09012482667047
AL513477.2	-0.250510876853674	0.710170170302563	0.916716082816368	-0.959936696695557	0.16984287006634	0.288993955247074	-0.429732122927584	0.524889490378082	0.736363504673629	-1.79838334753464	0.0171304116392192	0.0392483020993676	-0.852323898133932	0.118598771122038	0.198947781027384	-0.1387471492696	0.832396261622911	0.974432611284184	-0.680852677687667	0.325394919072966	0.47982954579675	0.248518607924413	0.721767952284577	0.902265897143421	-0.237983729783979	0.739738473657805	0.898162865445925	0.503147312668773	0.45608220802411	0.632848775801217	-0.031229081977736	0.963885966998546	0.999999999999901	-0.715923301896869	0.227887484312164	0.34479266088528	-0.277252948825147	0.715139130854648	0.896996790858005	-0.222585360224332	0.769316872049526	0.924390560268716	-1.35133516787377	0.0990968033702508	0.172135445604699	2.68462672123287	0.00873375151141454	0.022249823112107	2.27990718669866
RER1	0.345768824848249	0.00140394631557216	0.0047673216956856	0.330924138261686	0.00221730899822996	0.00576190642876057	0.417074919545152	0.000112226320454042	0.000406879630001351	0.329435157360627	0.00230634694004684	0.00630595300310229	0.403247901078956	2.24402365424831e-06	6.75280223336097e-06	0.362847968936826	0.000754899083840036	0.00194041837412158	0.32798064089442	0.00240344811208735	0.00579058188938209	0.555892530145315	2.68187558776923e-07	1.08280083304533e-06	0.550515039371517	3.52128096142577e-07	1.32929552285518e-06	0.781215148807923	4.411987250712e-13	2.84828538693293e-12	0.554592961394885	2.80275404871147e-07	1.02858373111539e-06	1.3262158802674	8.3218274690186e-48	1.39189984807106e-46	1.12090347798583	4.14927385756474e-20	6.51205837589786e-19	0.641542076307963	1.62713706221851e-07	6.33138251374069e-07	0.578085594239334	2.36548431272247e-06	8.34299646953466e-06	0.836918689172317	1.27953810951613e-10	9.43367280774362e-10	0.781015127275395
PEX10	-0.410621464886068	0.00672291776569486	0.0194709053646921	-0.338500333923812	0.0253096738535734	0.0535660156334838	-0.319334657549539	0.0342498842743211	0.0752039131439643	-0.294005989633771	0.0516849754930587	0.105150242651543	-0.25741581834438	0.0305602774581758	0.0577485552929942	-0.27336282241769	0.0689011285441408	0.12357089912004	-0.248670500635304	0.099566134255287	0.172999734638326	-0.214369527680595	0.156278934701396	0.265634101982172	-0.0691685439352154	0.647235067391417	0.820723626208682	0.38033338471051	0.0114783341517788	0.0246803254735115	-0.0674565407370458	0.654974295858477	0.841046736576202	0.814130238763534	1.59549047374717e-10	6.13974702024158e-10	0.277018605100098	0.104382900828939	0.185350830775628	0.127692798474735	0.456424677143452	0.621108429204514	-0.0577962090453142	0.736574659564423	0.915006491453149	-0.273360750103308	0.13062120200341	0.242680578919767	-0.234509859338208
PLCH2	0.365765932864207	0.544948355903299	0.771152455203926	-0.128327777254594	0.836023545893845	0.999999999999901	-1.02374819928456	0.116756965627883	0.218114719028882	-0.557240267426404	0.373953353571452	0.569399275152251	2.33941425598493	4.78406330423023e-07	1.51981878893643e-06	1.4755385649591	0.0102759665445499	0.0219470762355738	2.09256051549899	0.00028137349752962	0.000778031336229581	0.412772450362431	0.519935070651546	0.719231867443371	0.625004626204437	0.322403861438574	0.477605017805812	1.01478194471796	0.0949278965115115	0.167118279412862	1.34346194929489	0.0237276452461567	0.0471269711965648	-1.72231663499977	0.00339999185398237	0.0071079000840746	0.894058404760334	0.181490931185571	0.298832527092053	2.85129891525443	1.10281165121462e-05	3.51406165217972e-05	2.73498427306449	2.95633895544438e-05	9.18014512651574e-05	0.925406959421159	0.1729669557762	0.307624711621779	1.33440110050793
AL139246.1	1.08547530163542	0.148045321418684	0.283091804552255	0.473671275318737	0.552289417329576	0.756674200143982	-0.0874160961380724	0.919671533922891	0.999999999999893	0.0308365389566368	0.970666499245973	0.999999999999901	1.30502128858764	0.0389751330565295	0.0722300424001284	0.908559515841385	0.226882755971678	0.351301160481994	1.56404152606474	0.032103164237123	0.0627749358736499	1.21346176807685	0.128032955933945	0.223618507271546	-0.0874160961380721	0.919671533922892	0.999999999999893	0.623327083062984	0.443892513075169	0.619205346252008	-0.087416096138072	0.919671533922892	0.999999999999901	-0.0874162226964993	0.904307521845701	0.999999999999938	0.0304779070672693	0.973974997961514	0.999999999999876	-0.0369417868339363	0.967289634904294	0.999999999999913	0.549384795006519	0.538921787203569	0.717218887349329	1.975500234734	0.0371442474482885	0.0813738436469161	0.564745737518302
AL139246.4	0.565063826547462	0.459400394426735	0.6848548583784	0.408922545813618	0.604668921939814	0.807852519419721	-0.0875855333788449	0.918850393227931	0.999999999999893	0.0308603743305509	0.970381673812184	0.999999999999901	1.57694497534189	0.010971548905981	0.0222646265220111	1.94628917030601	0.00477730647300844	0.0108545160177941	2.00519699268014	0.00421926451250256	0.00976034059888509	1.48496919444015	0.0497721434710118	0.0964903773694796	0.292668090641885	0.724089418830234	0.885255570860199	0.251936461029498	0.76131896674115	0.920343545283473	0.194567768668063	0.814634038025423	0.967809325868895	-0.0875855333817834	0.903317385019635	0.999999999999938	-0.0875855333759045	0.928703814116079	0.999999999999876	0.214124058997157	0.797727610593215	0.947344821639263	0.117393019213411	0.895073479282004	0.999999999999922	2.26857608856199	0.00815966912347762	0.0209249886202884	3.10664962543831
PANK4	-0.258851913899382	0.0676708616597657	0.147565713794772	-0.381107433667171	0.00719141050919255	0.01705747281363	-0.0760973546365921	0.588073151495487	0.798600824905253	-0.0189405732237281	0.893028438969244	0.999999999999901	-0.165788149815458	0.136429337793204	0.225851041309325	0.0764113052018867	0.584215756158815	0.763172259591422	0.0731739433467026	0.6028201102572	0.781662108828211	0.129002670764619	0.359975055944592	0.535506762038557	-0.000487606711992728	0.997247637329618	0.999999999999893	0.0275545945287728	0.844771659154782	0.987026296599782	-0.350738747270973	0.0133460388366879	0.0277350146774543	0.383516533794365	0.00127574086033107	0.00280918137444901	-0.134821168866608	0.39867908658619	0.574692306334437	0.574965253048198	0.000313418586593871	0.000831570152666415	0.381864698292407	0.0170273528324274	0.035160801201164	-1.06052273614529	4.9857850849535e-10	3.46445322238818e-09	-0.691145678633847
HES5	4.13359639168333	1.39462221280678e-06	7.93134715462964e-06	1.90535273821883	0.0341620477799078	0.0701617941348226	1.97000132561479	0.0278003579317559	0.0625395517488501	2.32151536125609	0.00849011938104336	0.0207924536664242	0.673430907038552	0.380925691594486	0.552982229418126	0.00982583949507985	0.992088761374152	0.999999999999901	-0.22907091282846	0.824087914786594	0.972461757548447	-0.22907091282846	0.824087914786594	0.986922405321467	-0.229070912828461	0.824087914786593	0.967838711886186	-0.229070912828459	0.824087914786594	0.969381199561082	-0.229070912828459	0.824087914786594	0.974231504520551	1.33826435357657	0.0962663811195482	0.159486658102082	-0.229070912820114	0.845645249188512	0.999999999999876	-0.221415068898877	0.845381238691445	0.987235892386283	-0.229070912820114	0.845645249188511	0.994866592573807	-1.70738228812124	0.140940064504941	0.258989567689252	-1.70738228812124
AL139246.5	1.41034149655575	0.0011957014841938	0.00411611652884876	3.49074193574569	2.04116055022664e-16	1.94326036796129e-15	1.47590536625884	0.00062956713073081	0.00200612942217561	1.55626047995897	0.000303478628424567	0.000970012666365902	1.78715486321958	2.60301318050672e-07	8.43275440555311e-07	1.97257609319764	3.77441808185696e-06	1.29700877938244e-05	2.14580596799956	5.98347580669463e-07	2.27206747152241e-06	2.3545359077822	5.02098106674339e-08	2.16895800269314e-07	2.72613771432528	2.21350829087495e-10	1.10973775351369e-09	3.11744549413727	2.61223904173527e-13	1.7169101936058e-12	3.56350856782451	5.10263591657402e-17	3.85310345289471e-16	2.5038451707861	8.99028275791118e-12	3.73490165332762e-11	-0.0966031632414789	0.852017549130514	0.999999999999876	2.31449219104367	2.43732808875013e-06	8.36063595785294e-06	1.93633933315462	0.000103417336262789	0.00030023321879778	-0.161160853196007	0.75993487791405	0.954633113240325	-0.44974761777878
TNFRSF14-AS1	6.41832043221169	2.26401343627112e-54	3.16405925115795e-52	9.00652337177682	1.78491935109816e-106	6.39569657560527e-104	7.87057287984565	1.18084555467814e-81	2.84589803399649e-79	8.70682337543536	1.31035579036398e-99	4.14286540178281e-97	8.60307381733938	2.05965228069278e-122	2.52414465518268e-120	8.61163014439601	1.34014001944544e-97	2.59306372642538e-95	8.69210678851501	2.76979632439238e-99	5.80014535064209e-97	8.44000597821759	1.24882744202025e-93	2.28823976715323e-91	8.87267297642956	2.41095568242623e-103	5.15322685840577e-101	8.86854644683393	2.63514423418686e-103	6.22381540951423e-101	10.3114350993835	3.73961236952701e-139	2.00995854612367e-136	8.22615777626341	3.3929804659544e-105	2.41011064065535e-103	7.18342026156419	4.50002849307124e-59	5.49176971229124e-57	10.4430278038474	1.14275800812946e-123	6.72448158351905e-121	9.72058334752319	2.55828249598639e-107	1.08586510237429e-104	0.485696523128078	0.448323858758029	0.661547985635169	0.0313231992684403
TNFRSF14	7.49278783308727	9.08577015774163e-97	4.71631346089276e-94	9.76788088674507	1.31698768095399e-163	1.55382061197042e-160	8.76232671389396	5.48391006745809e-132	4.11180095010346e-129	9.42094904432387	2.5892655032065e-152	2.66490511035336e-149	9.45809329953988	1.11588980899869e-209	6.27827503787888e-207	9.41344921608169	3.78401032300621e-152	2.65281059934463e-149	9.4629500197562	1.14723715727679e-153	7.92790042985005e-151	9.24707138270177	8.78492772461266e-147	6.07076155460983e-144	9.60026538122256	4.37114661719744e-158	3.55999746131993e-155	9.81066610981716	4.7612172739069e-165	4.58991061974572e-162	11.2058036348581	8.58440068856604e-215	1.88751461140002e-211	9.69389645551786	1.16548935373186e-201	5.67570902010613e-199	8.18956660979073	2.85399765650925e-96	1.23541508813306e-93	11.2398705984663	5.38390440342853e-180	9.9569543472407e-177	10.1803168852681	5.78517108928562e-148	5.87399048071524e-145	0.594976151631363	0.42240943739156	0.63139531023559	1.31435356149938
AL139246.2	2.69869296298267	0.000112109892945013	0.000469604949281154	6.55129955903217	1.08699430535649e-23	1.69835838284915e-22	4.91161035869243	9.48787769730144e-14	9.58261447054582e-13	5.90426883362585	1.75514958290618e-19	2.45594014387968e-18	4.09743353030498	2.2503654635419e-11	9.65743646228853e-11	3.89622845047136	4.77819289759149e-09	2.17314333429102e-08	4.29778851694458	1.22489599180891e-10	6.5312934095869e-10	4.28550820224429	3.92122550006252e-10	2.04994532707797e-09	4.535997987542	2.39405690062663e-11	1.297774452776e-10	4.70868933688198	2.23943611790609e-12	1.37097257518831e-11	4.59892293748794	6.7335888254779e-12	3.60673117323488e-11	2.82680565097694	1.31121130780609e-05	3.53051743840278e-05	1.61222772814788	0.043682610575464	0.085544408599681	6.83937836364615	5.44272331053273e-23	6.85576602260561e-22	6.17608657467606	1.07990924778302e-18	1.07602348620259e-17	-7.66523464170347e-07	0.999999415977006	0.999999999999823	1.07403655915384
AL139246.3	2.37741966093622	0.000404148972971608	0.00152360614814524	5.39666462948014	1.24373222417198e-17	1.29410752591679e-16	2.67906895167502	5.25945232213955e-05	0.000200695330269736	3.41607549028188	1.19627358833759e-07	5.96632047516796e-07	1.74544995059763	0.00360560293056176	0.00782008965722111	2.05163298433687	0.00229994590210706	0.00550441733240772	0.972436857239138	0.175204477124257	0.283526233505008	1.92440753653412	0.0085270263379232	0.0192521747978697	0.0737155947259714	0.928929114735443	0.999999999999893	2.70360149184503	9.04219409812137e-05	0.000270555598031899	2.39899475011583	0.000516200016497556	0.00133473077817171	-0.041485721143824	0.952221048537598	0.999999999999938	1.04619040222363	0.188000961719077	0.307976730592439	4.7909324512838	5.4772971855154e-12	3.1825727127193e-11	3.77594322276428	1.95501676725582e-07	7.75759641829947e-07	0.191386752258174	0.823157975048781	0.994132724858212	-0.831898574101826
PRXL2B	-0.532141630217536	0.0431389976875917	0.100179776499128	0.285633206008915	0.276634195337418	0.436566159828295	-0.267195940882572	0.308932265927724	0.489814165932532	0.651914145480856	0.0129567705227303	0.0304650688035791	-0.977669743338639	2.36900241511207e-06	7.11462323029321e-06	-0.748294674924308	0.00436401828980638	0.00996933443838508	-0.570482805398915	0.0300470192763865	0.0591729212008568	-0.536096717651473	0.041598225472604	0.0821587032821441	-0.181871812403967	0.489076887695855	0.66876610056706	-0.0852371166161557	0.74553081420445	0.90782928917288	0.684055843357062	0.00912111990177087	0.0195202377121781	1.0414115389319	2.66566946629931e-06	7.60680052908469e-06	-1.48671703169692	6.83848966849504e-07	3.02402992884484e-06	1.37902478697956	3.49262928257659e-06	1.1783869047411e-05	1.16561855371134	8.83753474246916e-05	0.000258594146787184	-2.00284244716529	1.87296909491337e-10	1.35841303756215e-09	-2.34820871286359
MMEL1	-0.369498732493076	0.196461145877455	0.357358202002901	0.459632136858017	0.104829227232991	0.189952128045925	0.00174586184018895	0.995087095677754	0.999999999999893	0.83289240757127	0.00319761258361474	0.00850767908845476	-0.669509961707436	0.00301114239919082	0.0066013403881658	-0.359363132887816	0.204238657424358	0.320913290963051	-0.137826779831862	0.62822466290163	0.805842104917413	0.0502904894328035	0.860001274535472	0.999999999999901	0.312096084235223	0.272657382790369	0.415535305399861	0.404496843894685	0.153621672539274	0.255164631166274	1.19358024881283	2.36548581622128e-05	7.20111047124429e-05	1.57809824010264	3.98652051291088e-11	1.59555332619634e-10	-1.35853858543316	3.78907667841536e-05	0.000131520510900572	2.16544680460358	1.13474268842985e-11	6.44585132020214e-11	2.03594769841491	1.79465315647968e-10	9.43381630311515e-10	-2.18211487189191	1.46273952516121e-10	1.07357717448788e-09	-2.67674417312196
MMEL1-AS1	-1.68507396585068	0.0379257597562404	0.0895301905849839	-2.0328350428038	0.0151328974274809	0.03364079261303	-2.17421267448407	0.0119484601974023	0.0295285871269588	-1.29682081684005	0.0914469778875596	0.173643362565453	-1.09898350479399	0.0591548858025508	0.106016707122642	-1.78197927361892	0.0254507774759898	0.0502174277551826	-1.92343907919441	0.0184893222238757	0.0379668032404609	-2.17421267448407	0.0119484601974023	0.0262659788742986	-1.35042638703415	0.0935702583409728	0.164470428416035	-2.17421267448407	0.0119484601974023	0.0256095745879891	-1.52130255863655	0.0609726776404391	0.111296016737968	-0.891958916051273	0.155515215610999	0.245725005766532	-2.01920507262018	0.0352579868223033	0.0706470960833349	-2.1435102892754	0.0256334209274134	0.049886328768951	-2.11402633968085	0.0276805879477282	0.0548118192687549	-1.01699629100996	0.264831169544214	0.438418376524849	-0.749518455041583
TTC34	1.37197944610997	0.0303374443967207	0.0738000752378152	-0.177169465023777	0.787975330459603	0.966928170099248	0.226806967991095	0.725556793768943	0.918481207751938	1.70137586733347	0.00669531250847127	0.0167241206913165	1.68241681048827	0.000856884675212524	0.00200573076562251	0.563910725075756	0.375163126213528	0.536140773997961	0.706646592509158	0.272178647269368	0.413352307684326	-0.0654428588128402	0.924283088228925	0.999999999999901	0.610187742609963	0.359416856802115	0.521588123138681	-0.336684600857184	0.625396053026995	0.809564916194025	2.20967472745287	0.000447513213842907	0.00116843291915706	-0.277621665102107	0.621049674973695	0.797466706523953	-0.529442362104223	0.485345844735573	0.67347475818917	2.6094595882703	0.000244937543983601	0.000659985474040108	1.58610874080747	0.0303856782032105	0.0596822020329559	2.49631297434778	0.00143647425074165	0.00427458322932363	2.14099664837846
AC242022.1	4.77990371079896e-13	0.999999999999551	0.999999999999893	4.77977119600935e-13	0.999999999999551	0.999999999999901	4.77591388405024e-13	0.999999999999551	0.999999999999893	4.77710989601502e-13	0.999999999999551	0.999999999999901	-7.9761106820313e-13	0.999999999999048	0.999999999999831	4.77635834750195e-13	0.999999999999551	0.999999999999901	0.486507236958378	0.552051226337884	0.7318055297522	4.78200601443255e-13	0.999999999999551	0.999999999999901	0.463575491434135	0.571019469945885	0.755616626098377	4.78243881379658e-13	0.999999999999551	0.999999999999893	4.78413926547528e-13	0.999999999999551	0.999999999999901	-4.78187571148146e-13	0.999999999999469	0.999999999999938	1.43417447529454e-12	0.999999999998812	0.999999999999876	1.93439287549813	0.0105889913162591	0.0222193750437575	2.5580898428664	0.000579069036380954	0.00151597229074393	-9.55731927434348e-13	0.999999999999249	0.999999999999823	-9.56884398563537e-13
PRDM16-DT	1.42751207457452	0.0422429916289321	0.0983795392977304	0.874229621940874	0.243989752969948	0.393050363674414	-0.0525990012903406	0.950647438563151	0.999999999999893	0.0746570168048463	0.927530238694795	0.999999999999901	-0.052599223691968	0.936546460485569	0.999999999999831	-0.052599001290351	0.950647438563142	0.999999999999901	-0.0525990012903503	0.950647438563142	0.999999999999901	-0.0525990012903479	0.950647438563145	0.999999999999901	-0.0525990012903542	0.950647438563139	0.999999999999893	-0.0525990012903515	0.950647438563141	0.999999999999893	-0.0525990012903513	0.950647438563141	0.999999999999901	3.62979018335168	1.80359067781308e-09	6.47788479317221e-09	0.737864239776872	0.369132723355742	0.540083564205765	0.474854211977738	0.555388066535478	0.729348251405119	0.529050821783648	0.530306539538024	0.708434447649786	-4.38227144275757	2.01343278403056e-08	1.17796042134322e-07	-3.56599783240071
PRDM16	-0.830107205140689	0.234553091352323	0.411406348676605	0.2634339176383	0.698273198012768	0.893208414625334	-0.924149645173795	0.187004637762155	0.324768541183889	0.124063234602749	0.854593909268178	0.999999999999901	-2.77467372595766	3.38550859280835e-06	1.00407281621262e-05	-3.14242798705584	0.000151029119457079	0.000428916315123424	-2.33961013558209	0.00225445737581832	0.00545465246038413	-2.62189156679485	0.00139094864893523	0.00359309831223667	-2.19182632339984	0.00647360525073265	0.0144494490964824	-3.45253846965976	8.63891072721956e-05	0.000259227687728161	-1.69965978703144	0.0254201105260761	0.0501835288118957	2.7368905250366	1.13403618662604e-06	3.33378202390658e-06	-1.07842102267773	0.183101239041057	0.301121748034595	-0.652332557301034	0.414270119877147	0.573035303387068	-2.37499011687439	0.00696664739084021	0.0154313415108169	-6.05610291325892	1.76860315328962e-11	1.41001699834501e-10	-6.72767020965264
AL590438.1	0.967718329693172	0.271461272675251	0.461077132694288	0.373748658572517	0.688555123788144	0.884402352646076	7.96726510629178e-08	0.999999934946315	0.999999999999893	7.9672652664631e-08	0.999999934946313	0.999999999999901	-1.32787800517003e-07	0.999999862196987	0.999999999999831	7.96726503421468e-08	0.999999934946315	0.999999999999901	7.96726508226608e-08	0.999999934946315	0.999999999999901	7.96726520239457e-08	0.999999934946314	0.999999999999901	7.96726491408619e-08	0.999999934946316	0.999999999999893	7.96726514633461e-08	0.999999934946314	0.999999999999893	7.96726508226608e-08	0.999999934946315	0.999999999999901	1.36905898557354	0.0761082562150857	0.128967436572177	2.71510061549409	0.00243540317034967	0.00624681838265533	1.54975721334429	0.0986830036979617	0.167880087404039	1.74722927895387	0.0644745823084373	0.11774598115598	-0.591079465920318	0.5976231268344	0.810491355733024	-0.59107946592032
AL354743.2	0.385399486942002	0.677130637938552	0.888637549155508	0.554132107265379	0.547368085088676	0.751503293935142	0.27750672025251	0.767263027762445	0.948377738183343	4.14998727472678e-07	0.999999662864821	0.999999999999901	-6.91664869120311e-07	0.999999285847618	0.999999999999831	0.0755587273442558	0.937150767603387	0.999999999999901	4.14998724909936e-07	0.999999662864823	0.999999999999901	4.14998722987881e-07	0.999999662864824	0.999999999999901	4.14998724909936e-07	0.999999662864823	0.999999999999893	4.14998726831992e-07	0.999999662864821	0.999999999999893	0.529558934784731	0.571714390986939	0.76065176076129	3.76810784798679	3.0111838168875e-07	9.25503189647313e-07	4.6016727332921	1.08834661019895e-07	5.30769402216042e-07	0.320707532985598	0.752648470689537	0.911212843863189	0.648980306380492	0.52113256651385	0.699059857829358	-8.29997008387701e-07	0.999999435865037	0.999999999999823	-8.29997010309757e-07
AL354743.1	3.87267851171054e-13	0.999999999999647	0.999999999999893	3.86627079718569e-13	0.999999999999648	0.999999999999901	3.87217952216226e-13	0.999999999999647	0.999999999999893	3.86702218683744e-13	0.999999999999648	0.999999999999901	-6.44795819352312e-13	0.999999999999253	0.999999999999831	3.86244873411174e-13	0.999999999999648	0.999999999999901	3.85996577429074e-13	0.999999999999648	0.999999999999901	3.86236317506531e-13	0.999999999999648	0.999999999999901	3.86000258734899e-13	0.999999999999648	0.999999999999893	3.86500442187173e-13	0.999999999999648	0.999999999999893	3.86060994476468e-13	0.999999999999648	0.999999999999901	0.594192659784436	0.40084831633237	0.560284921040161	0.157443435451289	0.866995148558001	0.999999999999876	1.81561459556957	0.0215921822175188	0.0426514580114352	1.96569596875007	0.0140718071872008	0.0294857116325342	-0.57497891975403	0.56286339940252	0.782183407789387	-0.574978919754029
ARHGEF16	-4.39052322591773	7.82075406187671e-10	6.66478368430218e-09	-6.41852258786506	3.96706873863171e-18	4.32107669655104e-17	-4.86289299037418	1.05977730764139e-11	8.84777318505769e-11	-4.92608725503158	5.5405808978344e-12	4.26028484773396e-11	-2.11664692999898	0.000137639574865341	0.000350982333701993	-3.45593286406761	1.01442899769651e-06	3.70095587190385e-06	-3.70257620002733	1.89189843702035e-07	7.57088046773539e-07	-2.19279181009604	0.00191917325065485	0.00485519416630547	-2.95907064124802	3.05753926117183e-05	9.42255885177283e-05	-2.79266887487824	8.00401397470001e-05	0.000241341509078836	-8.50422672829263	2.07148305912323e-24	2.43154210189197e-23	-4.49656633632979	9.71923847718943e-14	4.50893608056917e-13	-3.63710724949072	6.3577742391763e-06	2.46834675444479e-05	-5.53305065720874	2.13303810965737e-11	1.1832363410004e-10	-6.71421159290445	2.55024975679521e-14	1.83034765289156e-13	0.127178384150283	0.879834141042395	0.999999999999823	-0.201317771550737
AL512413.1	-0.251298564356642	0.730353314129484	0.933029519134964	0.0333022034442988	0.962428653343156	0.999999999999901	-0.299811442681212	0.69027109636571	0.88857707532435	-0.463676871893454	0.554352788235541	0.769991024674606	-0.0588536316299504	0.916649592372007	0.999999999999831	-0.385309942301877	0.608834750194243	0.78689618112983	-0.463676871893455	0.554352788235541	0.733812424412823	-0.463676871893455	0.55435278823554	0.758148358080797	-0.463676871893456	0.55435278823554	0.738807727216527	-0.463676871893455	0.554352788235541	0.739277904573057	-0.463676871893455	0.55435278823554	0.74269394076657	-0.463677032641248	0.467572852061859	0.636475156306104	0.304132376742679	0.685089460080368	0.868359506350084	-0.463676711145744	0.609190600336184	0.786735088839779	0.171898396609709	0.830943287612993	0.984368966472905	-0.868888206056056	0.233397448753185	0.394878054683174	-0.359785397152334
MEGF6	-0.731710207907114	0.240320300508515	0.418986123684976	-1.27659661122329	0.040564808799228	0.0818350778232153	-0.525788421054546	0.398661816524758	0.598569283467785	-1.05720819673656	0.0898056578565707	0.170949515484649	-3.534816667727	6.65743002219347e-13	3.11870581728471e-12	-5.08624894256571	5.4231841206818e-16	4.16935291592087e-15	-4.6344540924494	1.76529560792562e-13	1.17426628770883e-12	-2.99131148456916	1.72552987128788e-06	6.38973103144828e-06	-3.8714901615952	7.25860830739869e-10	3.4972958039228e-09	-2.0801406270226	0.000854148164448162	0.00222042798107082	-4.14509032339804	4.16720846332976e-11	2.10593789173266e-10	-0.797183516309935	0.130121781448318	0.20955031140041	-2.05723114452136	0.00363318680710095	0.0089956675156409	-0.754383785474628	0.285859374020206	0.423804854697903	-0.52315185524971	0.459138347814054	0.636868130956154	-3.00533263518703	5.62678499339562e-05	0.000211011674944258	-1.24067289462397
AL513320.1	1.53920241118008	0.00778019860111623	0.0221420196000077	1.57718337635273	0.00642550089437074	0.015359792190324	-0.204412599874513	0.74337140662034	0.931824559012758	0.438539295435901	0.463139305211791	0.671902001435188	1.0703017192724	0.025298430009634	0.0485089875762747	1.45874704635326	0.0108305264796952	0.0230358816955676	1.05287895371804	0.0756601376738661	0.135657653719483	0.912515460697201	0.146260138025213	0.250870209796952	-0.297479250751692	0.662061337309651	0.832436088011285	0.0107275229496156	0.987014403248235	0.999999999999893	0.288383547100158	0.649520257401928	0.835751540440056	-1.77915005175614	0.00336473241737873	0.00703883676210505	-1.93655982613911	0.0233059324078948	0.0487648111022614	-1.53819533106584	0.0610561277369749	0.109385187607382	-2.34014970150146	0.00885788024701909	0.019275220188286	0.0759622986072576	0.921094245650815	0.999999999999823	-0.457802960239096
TPRG1L	-0.0719542118528937	0.741503133385242	0.941417607690122	0.610080995820087	0.00504474122074547	0.0123054443583844	-0.197341846792812	0.364897286005612	0.558597825422014	0.811982270609978	0.000187501836602759	0.000620172741332326	0.528461140530965	0.00205075185968901	0.00459163276466615	0.452343383802561	0.0372357882657921	0.0710171030943169	0.363194751082907	0.0950836015449969	0.165950319582051	0.368910707014345	0.0902030769531243	0.163889477218055	0.868265796216735	6.54178261004395e-05	0.000193982539328717	0.6034288624091	0.00552202147345124	0.0125999289122508	1.50844695812356	3.72234495451797e-12	2.02999991527506e-11	0.942880339100461	2.96337360394185e-07	9.11472243078094e-07	-0.999348662625997	5.72298282917228e-05	0.000192857933572599	-0.489550958107557	0.049162620079077	0.090020790507597	-0.102512081809828	0.679264510316194	0.859168396133451	-0.304564285793749	0.243899154286094	0.409801969658522	-0.217991092858659
WRAP73	-0.448925795812865	0.0112750074303534	0.0308823800294332	-0.810671485180111	5.07865456574121e-06	1.89808975746426e-05	-0.414041840957391	0.0188670330344504	0.0443195603684089	-0.984447268839579	3.00448206586425e-08	1.60734141751882e-07	0.159983419274681	0.24908521089685	0.384320417486176	0.040020454140471	0.819402105120893	0.965788797324942	-0.0496980133742595	0.777872623798213	0.936113852895586	-0.193015722752887	0.274744709386168	0.430586323473291	-0.182916422807668	0.301097416391339	0.451464533331566	0.11884393184227	0.499523692486103	0.680176433713817	-0.218832702412719	0.215460778942686	0.341016400870155	-0.127799220287571	0.392161320855199	0.550390795766569	-0.726138506527962	0.000303209517023064	0.000911951374734252	-0.21745782776351	0.280675960145308	0.417063423461347	-0.61599530494083	0.00244227462767663	0.00583421631429528	-1.26588480745717	2.80311186201469e-09	1.80420486477706e-08	-1.08454922067537
TP73	-2.70413711488522	2.82900421388508e-08	2.0065115923617e-07	-4.22196109685801	6.77407418218393e-17	6.68602918618207e-16	-3.89313567582346	4.66845575723543e-15	5.31254744891664e-14	-4.15633282072429	7.65235735877035e-17	8.79257678184794e-16	-2.28454143407542	1.80744284928705e-09	6.82647821428415e-09	-3.32048784533788	8.13324011165565e-12	4.64826587808505e-11	-3.33306542975118	1.48365531158273e-11	8.4973784498214e-11	-3.65040988646864	1.47116878180235e-12	9.31965001075499e-12	-3.25147100685291	1.35772976815698e-10	6.93427192760637e-10	-2.7026138510205	3.92056814537578e-08	1.6797154697613e-07	-1.04299429284636	0.0293629410886059	0.0572177549661268	-2.62918460770926	1.56166293111239e-10	6.01231325040808e-10	-4.46114684956088	2.58489832446221e-14	2.51807579420491e-13	-2.86402157139253	5.04472543548831e-07	1.86780364096876e-06	-3.48496225345033	3.93222958636008e-09	1.83278708074243e-08	-3.23201341104506	4.59027111222518e-08	2.58439376076497e-07	-3.18925268255596
TP73-AS3	-0.0369536989082098	0.965494335140092	0.999999999999893	0.0434350725319458	0.959310760390607	0.999999999999901	-0.242259125355223	0.78785810976662	0.964111268811303	-0.242259125355223	0.78785810976662	0.971948186573684	0.378589737928151	0.570684384893204	0.764778674290296	-0.242259125355223	0.787858109766621	0.944016105876165	0.0884830386547659	0.917300792023426	0.999999999999901	-0.242259125355223	0.787858109766621	0.957804984763527	0.677686950926372	0.424363503356377	0.596685780861592	-0.242259125355225	0.78785810976662	0.94057808369106	1.58494646249918	0.0416492613578236	0.0788408749965564	0.671723877067566	0.343273191615879	0.492466696637884	-0.0864273009299084	0.929733465152136	0.999999999999876	-0.193028399066517	0.839029927674823	0.98190848727141	0.949320601741518	0.278329187365346	0.419767593107317	-2.96110784545745e-12	0.999999999997891	0.999999999999823	-2.96127155572427e-12
TP73-AS1	-0.896827047460237	3.47192272990037e-07	2.14945234590176e-06	-1.87108705667628	3.71066722148327e-26	6.67023803436679e-25	-1.83098354840434	2.92180848322675e-25	6.85290304479554e-24	-1.67030929597121	2.91548734877139e-21	4.57150306392605e-20	-1.4387145008881	2.97287557974959e-25	2.52080909109406e-24	-1.66440577362494	2.72750554863069e-21	2.97424765337945e-20	-1.73028956454214	1.07017503446908e-22	1.315901803314e-21	-1.6776381963147	2.18132401002099e-21	2.55923323639936e-20	-1.70851078271691	4.37728241466991e-22	4.93955302010899e-21	-1.49592801370743	2.10492820785738e-17	1.85297230254489e-16	-1.46692576160607	8.94283681564506e-17	6.64299516712528e-16	-2.00595426336474	4.51380836283252e-41	6.09779510120074e-40	-2.14735337988167	1.12308028370238e-26	2.8214049627178e-25	-1.50971573881312	5.62479937713329e-14	3.81962564216635e-13	-1.91470054672241	2.42707238125553e-21	2.88855640355217e-20	-0.80558705969654	0.00014101022334206	0.000496526270593283	-0.790794816729473
AL136528.1	-0.325389476268295	0.36557743969645	0.57941153935516	-1.13006026463541	0.00290883831605742	0.00741550650132519	-0.58079404603646	0.107036926507945	0.202633187618459	-0.747407487758449	0.0382659799436375	0.0805220222643804	-0.0855090171861862	0.763145052736652	0.938664812710714	-0.473692310341174	0.176441063045893	0.282980787862438	-0.223539995265237	0.532093940810178	0.711335955085418	-0.392296410400364	0.314596004019622	0.480774413244912	-0.21489886334186	0.574066313549162	0.758260819586858	0.255850449449138	0.477960191056824	0.656587144330576	-0.0737836989680311	0.839620297764615	0.98721135100551	-1.72190670435606	9.05087139820835e-07	2.68174359582086e-06	-3.09462711981921	8.5926589302134e-09	4.77961344513551e-08	-2.28588683787223	8.43173436691744e-06	2.72173357886851e-05	-2.35020420707521	1.46318629149015e-05	4.70726737899071e-05	-0.518033009965133	0.276006154993798	0.45256007944994	-0.10220280243553
CCDC27	-0.500990450625565	0.113836465629412	0.228519532826337	-0.851865166066622	0.00736217358677863	0.0174351523995517	-0.628832213032157	0.0459721044310536	0.0974241497088237	-0.8013305143245	0.0112152517422326	0.0267117367073864	-0.626372914400513	0.0121296552064735	0.0244683571922958	-0.858533348870831	0.00623268133375191	0.0138643196062532	-0.76521486660663	0.016021545740847	0.0333108498290205	-0.309898527890572	0.329572939402577	0.499277560919509	-0.537096463086883	0.0935441474543099	0.164430651334024	-0.593965116122955	0.0623359530111307	0.114793318482195	-0.50998095004442	0.108316043940822	0.186269401455771	-0.807813484110338	0.0026647368780508	0.00564560819601594	-1.19148779666462	0.00107279795120104	0.00293010435401651	-0.23471329356174	0.519565484674833	0.691298838431534	-0.672796409431023	0.0702111824916333	0.127048455916562	-1.72026049260901	5.91706323132438e-06	2.55395025455107e-05	-1.63652348894583
SMIM1	4.18559513006003	2.23131960630163e-25	6.93426606860987e-24	4.64134131394299	6.95555905057111e-31	1.64931989192782e-29	3.98919918693425	3.15479567789129e-23	6.48208279410834e-22	5.08789491820075	7.88818126132599e-37	3.01640310003259e-35	1.16580760917348	0.000370457992503263	0.000902289731740902	0.602156925782634	0.141131719098821	0.23289092747381	0.898709950622208	0.0295540700846055	0.0582733066564474	1.02108724568242	0.0146046044550042	0.0315740125721527	1.55589054327024	0.000162287325146339	0.000458353744570261	1.33784583986613	0.00117621870323095	0.00299779016318767	1.10861396592358	0.00731983863454587	0.0159252745465902	-1.3591259518788	0.00045740346770198	0.00105890460416119	-0.519520233296738	0.287939594754333	0.440946683476292	0.819907172789453	0.0879691896616819	0.151560704959106	0.883075214884303	0.0678477804702382	0.123152662656476	0.502972176760269	0.303566348694385	0.487342428401191	0.0889182204938975
LRRC47	-0.644124293831307	9.26940810082251e-13	1.05916553086249e-11	-0.700788347300413	7.5094148453665e-15	6.35279685755358e-14	-0.846165273963634	4.88033898518287e-21	8.66012669583333e-20	-0.742241907668988	1.66126347414832e-16	1.86321117632684e-15	-1.2540451836248	1.933604601212e-69	7.13905275246884e-68	-1.29721219254073	1.86662747175114e-47	7.53709271210501e-46	-1.37386128097299	6.78917940770952e-52	3.47159593540309e-50	-1.2782665074771	6.51309476055812e-45	2.48860926423758e-43	-1.30538795482518	1.54959798537191e-46	5.85118785251902e-45	-1.01643225346356	2.06062978303143e-29	3.74232868362382e-28	-1.15580762740261	2.71189556628895e-37	6.03415474830246e-36	-0.482630813899975	2.21042605530559e-10	8.42547136276111e-10	-1.28412325883673	9.12949180631226e-36	3.84669086541174e-34	-0.985441752399105	1.43410974729667e-21	1.64079772523781e-20	-0.916626803881889	6.05144042969759e-19	6.14193923502608e-18	-1.30059565055545	8.11111488897994e-33	3.42705486592796e-31	-1.36063377214715
RN7SL574P	2.25459060659209	0.0021508981428466	0.0069940094702034	4.02029294988694	1.63160134766003e-08	7.97629631029397e-08	2.86078878836712	7.37330375002404e-05	0.000275025860107301	2.97765033902456	3.39158154137975e-05	0.000124100585401787	2.00369871812551	0.001048492885703	0.00242965137433498	1.54214969772978	0.0378123122587307	0.0720087784296516	1.34834068711042	0.0702862440361114	0.127063176723179	1.20210914648368	0.135461565028481	0.234930527933556	0.907281928232434	0.263343324096003	0.403438450215865	1.67914974147283	0.0302288809882886	0.0598032270069016	0.678149544919358	0.400861025413508	0.576202832068818	-1.00778085711796	0.176512953047481	0.27505846035638	0.3906181013976	0.659930532131653	0.844458973959416	0.933729786666271	0.281462737404054	0.418088549697201	-0.286620519731562	0.75746486814095	0.934500828316842	0.00896710087217089	0.992315929769479	0.999999999999823	0.542091208636797
AL365330.1	0.124481466727892	0.416462832260975	0.63848803373833	-0.0239972579747799	0.875312567388256	0.999999999999901	-0.140894851808447	0.352708849608155	0.54434959090863	-0.23724526039757	0.120331833492383	0.220518706680067	-0.215714167865576	0.0790845755073833	0.138134354686589	-0.0889454029075932	0.549017961349673	0.727786189591069	-0.134597629796438	0.378637676620338	0.543206605704834	-0.147240751964198	0.350548455180301	0.524587095281273	-0.293041302720228	0.0672180801791956	0.122348198729372	-0.0524891209680194	0.73418493653293	0.899092470043969	-0.0365405649554753	0.813230176832696	0.966901397171635	-0.0151105942942568	0.907779938910749	0.999999999999938	-0.935710223046546	3.78797797765796e-07	1.72943236866911e-06	-0.00413472266987697	0.982115418196449	0.999999999999913	0.174785284903348	0.33877610813828	0.497570502530691	-1.61133756609461	2.01464280890486e-17	2.74569193203229e-16	-1.75223231701233
CEP104	0.249514039932143	0.080016338575345	0.170334915965911	0.788612992326019	2.63678467311554e-08	1.26348870720771e-07	0.60461090230892	1.92534753926527e-05	7.87766493826537e-05	0.863569905976814	1.04248833231048e-09	6.46682330069952e-09	0.512680518133833	4.86715638731871e-06	1.42514507003688e-05	0.471791935827018	0.000822217622271941	0.00210084159318406	0.506158118083648	0.000357978630317327	0.000974589165034898	0.761884573468834	7.71920390262794e-08	3.26913894573474e-07	0.800853988982905	1.64645510951072e-08	7.03642450085567e-08	0.619247362370701	1.24191263114906e-05	4.13594380693656e-05	0.654284070273716	3.95923445243621e-06	1.30873341648009e-05	0.199289213294695	0.0988081217349974	0.163286329278255	0.29589544013208	0.0659501805783061	0.123607166218966	0.55321282052344	0.000620284445426982	0.00157513679077802	0.349899068731147	0.0310139951254716	0.0607848949541007	0.276119254201784	0.112072120336891	0.213079120481131	0.435899029699124
DFFB	1.47680969659988	1.02256985369237e-13	1.28193025952405e-12	1.69325323991692	1.2209710547023e-17	1.27151846779579e-16	1.55986350124928	2.85425519026071e-15	3.30456991231238e-14	1.79793982118015	8.95903586225044e-20	1.27463365224894e-18	0.714954500336265	6.90863017756977e-06	1.99680787344808e-05	0.865902379845386	1.17387488450417e-05	3.8240857827544e-05	0.791894941511724	7.30212167878143e-05	0.000218566630757808	0.676341666815016	0.000783588351995674	0.0020968368286268	0.512957701736534	0.011325838933801	0.0242508795483414	0.587093693159511	0.00347312561671411	0.00820546337684927	0.788840808557566	8.34213852250928e-05	0.00023804522578418	-0.415686328429647	0.0170598499689405	0.0323588315616254	1.19126390205122	1.11665767745617e-07	5.43895410006207e-07	0.806633907532664	0.000462752181982833	0.00119771561151682	0.798739056621432	0.000543315117348889	0.0014288227986087	-1.68202762039056	2.38609004826749e-11	1.87727740856115e-10	-1.92739280341988
C1orf174	0.82642825430493	8.40027059694592e-11	7.94560637140438e-10	0.997502703539912	4.0419484024158e-15	3.49957347539036e-14	0.501550379343451	7.92624478223224e-05	0.000293910059485285	0.945412882133782	9.46614929757396e-14	8.5589914013373e-13	0.252650819327614	0.0123492663065538	0.0248799399431855	0.198476636199357	0.117286944872535	0.198001025487512	0.094533577737206	0.459642330014115	0.634902296681119	0.0623357153147258	0.627176834562273	0.818387014601193	-0.0494727848319619	0.700890616681304	0.865380721740868	0.203887098197481	0.110447588449387	0.191337981280805	0.057384952428354	0.654526587934457	0.840561091622733	0.433702901810928	6.17554091905928e-05	0.000156712318562319	0.488291560443745	0.000708428506868953	0.00199927951403572	0.315140304387787	0.0306748347668739	0.0587634556151468	0.367044416285446	0.011756464738143	0.0249880972595846	-1.29670201495326	2.29501266066516e-16	2.86343140654623e-15	-1.29908764691084
LINC01134	2.5070420504553	9.10945324209504e-08	6.05208499011031e-07	3.99387283921877	4.22093176354716e-18	4.58314550388478e-17	1.99656936548793	2.20439832256066e-05	8.9266321099698e-05	3.19235498503471	4.99372042944461e-12	3.8508088368169e-11	1.98057907558249	3.0382736240359e-07	9.79030038396627e-07	1.76545823825282	0.000165940401133947	0.000469060657047416	1.66231018115083	0.000501509148326926	0.0013378647786918	1.71512684483046	0.000505869105197001	0.00138918002984357	2.28824268516329	1.98084580127975e-06	6.95681881896292e-06	1.88756747286504	9.51950175474852e-05	0.00028392013157536	1.61634258260705	0.00087550251831074	0.00219444962527827	0.448139970196715	0.306655920976821	0.447421519180459	0.538698553531102	0.339190532819922	0.504423412179873	3.42887277822041	6.10529566695713e-11	3.26130106789809e-10	3.0103795408875	1.59693058196117e-08	7.03179050388566e-08	-0.00637348440565604	0.992236990869738	0.999999999999823	0.789524295810849
LINC01346	-0.190223173185343	0.812912702138885	0.986856089818677	-0.100486952679029	0.900184247136652	0.999999999999901	-0.398165920922795	0.640694522519853	0.845710000688974	-0.177245504696173	0.824973130014956	0.998534348009846	-0.193568168412953	0.761348800730337	0.937293693536557	-0.251225055724583	0.760522846737293	0.922116795298353	-0.398165920922795	0.640694522519852	0.817631345148471	-0.398165920922796	0.640694522519852	0.830114266448447	-0.398165920922796	0.640694522519852	0.815556526995344	-0.398165920922795	0.640694522519852	0.821444702121712	-0.398165920922795	0.640694522519852	0.82714553732026	-0.39816592092435	0.571646137875386	0.746617590294164	-0.39816592092124	0.684471768183457	0.867706870201481	2.18898683128955	0.00303423694268855	0.00696832941295198	1.42554377370722	0.0725785222796632	0.130852086178114	-1.55357006427363e-12	0.99999999999885	0.999999999999823	0.583087481158397
LINC01345	0.0472088086640372	0.958905053486649	0.999999999999893	3.47467408658004e-13	0.999999999999705	0.999999999999901	3.47052825495002e-13	0.999999999999706	0.999999999999893	3.46912841778851e-13	0.999999999999706	0.999999999999901	-5.75517682768999e-13	0.99999999999938	0.999999999999831	3.47513898204283e-13	0.999999999999705	0.999999999999901	3.46886294523059e-13	0.999999999999706	0.999999999999901	3.4731476308283e-13	0.999999999999706	0.999999999999901	3.46810096991521e-13	0.999999999999706	0.999999999999893	3.46919949601369e-13	0.999999999999706	0.999999999999893	3.46257931056972e-13	0.999999999999706	0.999999999999901	-3.45817489851948e-13	0.999999999999653	0.999999999999938	1.03966958777183e-12	0.999999999999223	0.999999999999876	0.527543058202714	0.567460326359024	0.742227786811047	0.644170135162248	0.491362406668288	0.669250098753359	-6.92883165701052e-13	0.999999999999509	0.999999999999823	-6.92919010927201e-13
AL805961.1	-0.272292043847625	0.752223996910245	0.94995018369361	-0.272292043847624	0.752223996910245	0.93768868984556	-0.272292043847624	0.752223996910245	0.937656988736155	-0.0513749352992412	0.949516879368428	0.999999999999901	-0.140985507765533	0.829297105089374	0.990994660142965	-0.0662606346190004	0.934923134816511	0.999999999999901	-0.272292043847625	0.752223996910245	0.915611871934256	0.179668368799205	0.828840776120908	0.990574795881326	-0.272292043847625	0.752223996910244	0.908511798267731	-0.272292043847625	0.752223996910245	0.913181489605747	0.00505136656321906	0.995160113327208	0.999999999999901	0.322658913992883	0.639340300682657	0.813646447913395	-0.154877521858633	0.868522490689918	0.999999999999876	2.37076170352742	0.00177254250801418	0.00421570320189912	1.87888731630236	0.014915410336734	0.0311336945125403	-1.45395491969061e-12	0.999999999998924	0.999999999999823	0.265435927520704
EEF1DP6	-0.0539124424086166	0.929357407575926	0.999999999999893	0.390396567217377	0.504824944959885	0.706481880986429	-0.0227937815336202	0.969875962873212	0.999999999999893	-0.194021794600909	0.747214452495254	0.942552537565268	0.55260876330475	0.243025859025715	0.37627285340616	1.70305487917557	0.00126550713409873	0.00315207129384471	1.53758326693147	0.00485401514135415	0.0111102145562943	0.829397852280939	0.177135825304426	0.295784848543304	1.44075893468619	0.0140010622786881	0.0294609193664924	1.79102881214293	0.00140509349507006	0.00354137239497515	0.785909293463144	0.186317620061661	0.300605104237301	-0.322601906313569	0.547957876144137	0.72152154558537	-1.75427338633704	0.0526562877061935	0.101127387932497	-1.75427338633704	0.0526562877061937	0.0957812472351351	-1.73056347140749	0.0413613163778592	0.0788039679897966	-1.14268735192788	0.175745485256454	0.311730295034325	-0.766870060217284
LINC01777	3.80741556439282e-13	0.999999999999659	0.999999999999893	3.80370125207111e-13	0.999999999999659	0.999999999999901	3.80955464442435e-13	0.999999999999658	0.999999999999893	3.81168441884797e-13	0.999999999999658	0.999999999999901	-6.33099794445928e-13	0.999999999999279	0.999999999999831	3.80631150258798e-13	0.999999999999659	0.999999999999901	3.80965120156287e-13	0.999999999999658	0.999999999999901	3.81021966850291e-13	0.999999999999658	0.999999999999901	3.80817335737818e-13	0.999999999999659	0.999999999999893	3.81108435072331e-13	0.999999999999658	0.999999999999893	3.80881383127117e-13	0.999999999999659	0.999999999999901	-3.79076389084043e-13	0.999999999999598	0.999999999999938	1.14140870803441e-12	0.999999999999098	0.999999999999876	2.10207772707044	0.00805009808501328	0.0172326675955454	1.64754627760538	0.0446111134291739	0.0843717051388937	0.813635512491437	0.418094778604963	0.626333345711107	0.265142931548693
AL355602.1	2.25336717904097e-13	0.999999999999798	0.999999999999893	2.25618449613671e-13	0.999999999999797	0.999999999999901	2.25754518620041e-13	0.999999999999797	0.999999999999893	2.25523780480961e-13	0.999999999999798	0.999999999999901	-3.75051486059114e-13	0.999999999999572	0.999999999999831	2.25497038925541e-13	0.999999999999798	0.999999999999901	2.25597465559461e-13	0.999999999999798	0.999999999999901	2.25531164477791e-13	0.999999999999798	0.999999999999901	2.25468238588382e-13	0.999999999999798	0.999999999999893	2.25596810561977e-13	0.999999999999798	0.999999999999893	2.25222012386113e-13	0.999999999999798	0.999999999999901	-2.24897723559189e-13	0.999999999999761	0.999999999999938	6.75945228614143e-13	0.999999999999465	0.999999999999876	1.12068514067177	0.189311062595579	0.296856577366891	0.231206258599307	0.795336447187359	0.963863119771186	-4.50448688268776e-13	0.999999999999662	0.999999999999823	-4.50319870671125e-13
LINC01646	2.96628054022889e-13	0.999999999999722	0.999999999999893	0.640812483665945	0.403161405844624	0.592661723847383	2.95209548211064e-13	0.999999999999724	0.999999999999893	2.97011158507805e-13	0.999999999999722	0.999999999999901	-4.93663583483164e-13	0.999999999999413	0.999999999999831	2.95900204565259e-13	0.999999999999723	0.999999999999901	2.95825765200942e-13	0.999999999999723	0.999999999999901	2.96286189939298e-13	0.999999999999723	0.999999999999901	2.96546757348153e-13	0.999999999999723	0.999999999999893	2.96338236577109e-13	0.999999999999723	0.999999999999893	2.97358124484116e-13	0.999999999999722	0.999999999999901	0.589146461966784	0.396891595223951	0.555966580879884	0.158153877082297	0.862383945285517	0.999999999999876	0.737563170900523	0.367834300779313	0.523107332565576	1.33109315839201	0.0894223494944393	0.157181178678566	-5.92480162098412e-13	0.999999999999536	0.999999999999823	-5.91867185879671e-13
AJAP1	-4.50309060893288	3.69901785407874e-08	2.58171551969736e-07	-5.48122785452041	2.53726842464466e-10	1.48016504468567e-09	-6.31345036345372	3.82939695763514e-11	3.0188455288353e-10	-5.81367443884582	3.75459074961354e-11	2.6775883581167e-10	-5.90847194842816	7.77095550510373e-19	4.97025937234454e-18	-6.10930621731879	1.88899597916969e-11	1.04945908464885e-10	-5.98765565961255	4.81467520736451e-11	2.64930364925314e-10	-5.45343005085029	1.33339670129504e-09	6.66464131346817e-09	-5.8223509331686	3.08040957713383e-10	1.52605461137987e-09	-6.31345036345371	3.82939695763526e-11	2.1233621796903e-10	-3.21850653512904	5.62593045300928e-05	0.000163971280233427	0.846727999571955	0.184630560417211	0.286430171012989	-0.278130540468675	0.745992253870668	0.926290175775568	-1.9887147383101	0.0247988714920677	0.0484223213602467	-2.48135505109919	0.0059712604996386	0.013405435812572	-8.07420004154767	9.23964078995071e-17	1.18956912508831e-15	-8.37280038353677
Z98886.1	0.159774692285354	0.870174681432236	0.999999999999893	0.090545449801835	0.92626733808671	0.999999999999901	-0.0501749965746681	0.960081631499789	0.999999999999893	0.069552438909518	0.943343718049143	0.999999999999901	2.35625447873194	0.00125204394569331	0.0028734968615965	2.44550099533239	0.00393139574857603	0.00905889613422895	2.07082988758478	0.0155277825377746	0.0323788871756087	1.98990663885238	0.0287413868248253	0.0586577970161705	0.954634027880434	0.306905941786368	0.45861617703213	0.722575609914699	0.449912454351229	0.625976101033519	-0.0501749965746688	0.960081631499789	0.999999999999901	-0.0501750573841753	0.952525509217507	0.999999999999938	1.71721667721668	0.0764789697221895	0.141044130090671	1.22763925965569	0.211248799592394	0.32643300973689	2.43157977609958	0.0110472591961047	0.0235998441811835	-6.08094681828069e-08	0.999999960028943	0.999999999999823	-6.08094681027213e-08
LINC02782	-0.088640176227829	0.913857585524712	0.999999999999893	-0.0886401762278296	0.913857585524712	0.999999999999901	-0.0886401762278294	0.913857585524712	0.999999999999893	-0.0886401762278299	0.913857585524712	0.999999999999901	-0.0886401762285903	0.889208293500225	0.999999999999831	-0.0886401762278291	0.913857585524712	0.999999999999901	-0.0886401762278297	0.913857585524712	0.999999999999901	-0.0886401762278292	0.913857585524712	0.999999999999901	-0.0886401762278293	0.913857585524712	0.999999999999893	0.246706530490547	0.754213336185195	0.91479715910592	-0.0886401762278296	0.913857585524712	0.999999999999901	-0.0886401762283998	0.897289188226587	0.999999999999938	-0.0886401762272586	0.924349159260582	0.999999999999876	-0.0542788481957666	0.948196714239339	0.999999999999913	-0.0886401762272589	0.924349159260581	0.999999999999922	-4.3012923517845	5.18092831400852e-09	3.24577600489152e-08	-4.3012923517845
AL365255.1	0.268589346404991	0.718162064768101	0.92319766650658	0.900347225702155	0.181175714687182	0.305387582638618	1.31766507469734	0.0432402850728537	0.0923099085274276	2.65549437607024	6.16806708258118e-06	2.49492356372355e-05	-0.212605943445243	0.724616360051791	0.908334319126117	-0.212605943443924	0.790695031166215	0.946248008277957	-0.212605943443924	0.790695031166215	0.946974269438062	-0.212605943443924	0.790695031166215	0.960384943067426	-0.212605943443924	0.790695031166215	0.94066542052079	-0.212605943443924	0.790695031166214	0.942945245826773	-0.212605943443923	0.790695031166215	0.950076233788463	-0.212605943444913	0.746783131961465	0.910902398817956	-0.212605943442934	0.817601960721132	0.983686159940193	0.124377396673735	0.876056236639488	0.999999999999913	-0.188644084083036	0.827433803213628	0.982031230817797	2.17603516846398	0.0157650584859194	0.0379790936199191	1.58455641793972
NPHP4	0.277307296417477	0.162573740031868	0.306102350043262	-0.619352812549382	0.00202178684188989	0.00528134220232961	-0.117551540966467	0.553354625094465	0.764650492206508	0.581813258929167	0.00323301560467812	0.00859122186772039	0.0642081176170519	0.682133058456348	0.8721396521436	0.421647691780617	0.0320498621237118	0.0620288061338845	0.291738408332577	0.140781849847006	0.234545907444436	0.413348497177326	0.0371649212339315	0.074223968244456	0.14715741667928	0.460169828736854	0.636852285246771	0.0521462140432474	0.792986061669086	0.944856718035777	0.0887034564238724	0.655710423998367	0.841835562929906	-0.721406489418974	2.23100258172287e-05	5.89356127445944e-05	0.111475314834141	0.619986707762258	0.80864552229605	-0.0310504463147023	0.891972264605408	0.999999999999913	0.00414810357230317	0.985528125504748	0.999999999999922	-2.92408078863494	3.21967770369463e-33	1.40044121260979e-31	-2.22706060490256
KCNAB2	1.66257847288816	5.16131661117951e-06	2.69368150217972e-05	3.6791118908301	5.33792995903436e-24	8.46873354897899e-23	3.7935133903134	2.03692478199708e-25	4.81813800336486e-24	3.46222718780002	1.9534527384188e-21	3.08906078180884e-20	4.55104243309905	1.42516878397853e-56	3.69432102950581e-55	4.22556586681082	3.74906151674236e-31	7.21086889659555e-30	4.21740705499082	4.97168685905216e-31	9.7643283976017e-30	4.3991807571495	1.29695623439207e-33	2.95236065535283e-32	4.78413463447603	1.90950228036507e-39	5.21683974653585e-38	4.59945388828958	1.36587845875134e-36	3.46509134028126e-35	5.1285642196676	4.4491870473732e-45	1.39031346926734e-43	3.40405666188241	2.38279886118903e-28	2.11829438518132e-27	0.87812508329144	0.0337945126712501	0.068029607247829	5.38693095134061	5.36862333119026e-39	1.63243348184982e-37	5.69195892308905	2.43677799971987e-43	1.00866247129891e-41	-2.79577179750104	1.12624222229571e-09	7.54828374781247e-09	-1.73151560794937
CHD5	-2.04976391044911	6.40497924975657e-05	0.000280764666685923	-3.48712054889463	5.28574426646201e-11	3.265482853149e-10	-2.80492126448845	5.95590325573417e-08	3.34608708481345e-07	-2.99692061952029	7.19314571593123e-09	4.10565236243943e-08	-2.58092536715656	2.20023952922519e-10	8.85587020010311e-10	-3.10387887393701	1.83796589643687e-09	8.64022588030521e-09	-2.61500124469625	4.90266333751646e-07	1.87861639437329e-06	-3.08740881921582	1.77673149215909e-08	8.01733511848989e-08	-2.87102593037773	1.10775772801826e-07	4.39354759012581e-07	-3.06917769991119	1.21816595539655e-08	5.4698198892649e-08	-2.99994948216109	1.78075114463976e-08	7.28767132992038e-08	-4.52083942826774	3.10370784249574e-22	2.17353964865928e-21	-5.9921722125406	1.51676509349404e-16	1.78480680588056e-15	-4.85692513614158	4.17766867610755e-13	2.64497147640148e-12	-3.44433964274086	6.95455477600623e-08	2.88586994122871e-07	-2.21828648888046	0.000248116887029909	0.000839803481845215	-0.640055875168244
AL031847.1	-0.181957383094471	0.482025949191717	0.708335970196582	-1.15324762620558	9.08194077907234e-06	3.29523493328882e-05	-0.88573204426417	0.000626040685226464	0.00199543075897723	-0.897896710331285	0.000534175281415026	0.00163366383561289	-1.25338495085573	8.5729654534549e-10	3.30830937307877e-09	-0.430818608581061	0.0951709217927535	0.164676742018918	-0.403758534471753	0.118701176053182	0.202116652793854	-1.17693764117341	6.07636281581849e-06	2.11842809722225e-05	-1.13159184461406	1.37278172671455e-05	4.40979873681165e-05	-0.737087691535625	0.00445229582294718	0.0103312422158744	-0.568930849990461	0.0281186585988446	0.0549946982736388	-4.12342615625876	1.30788383364668e-71	4.23523559072059e-70	1.01003135443234	0.000551331101504765	0.00158417763342848	0.0472826653982094	0.872077785648677	0.999999999999913	0.50870760640626	0.0825923002696127	0.146593273599491	0.107092114490164	0.751930126714903	0.951555980977856	-0.283421630638799
RPL22	-0.260929274512602	0.155563939571256	0.2949850994953	-1.0810705055395	4.10556506814061e-09	2.13432024762134e-08	-0.710237336947883	0.000110795601371748	0.000401970186021293	-1.00782249218015	4.1827200799007e-08	2.20116099243947e-07	-1.14261150460154	2.78059774248554e-15	1.47984709048911e-14	-1.13420393725396	6.59019116093278e-10	3.22267809368987e-09	-1.11214207667782	1.44719057423623e-09	7.04913398927896e-09	-1.47076491869874	1.30376651655516e-15	1.03017147509511e-14	-1.41810709666478	1.2820770295122e-14	8.90348024743722e-14	-0.703154083393021	0.000129698288751414	0.000380484291749505	-0.917526725692118	5.95974203407339e-07	2.12400059982489e-06	-3.09829367976991	1.29502309341882e-87	6.09551483171834e-86	-0.745598558363742	0.00034562308342186	0.00102985389674551	-1.72262655253715	1.64857643061734e-16	1.34522901523255e-15	-1.31562394415672	2.8808054476972e-10	1.48775055847316e-09	0.650091089106187	0.00338467443197509	0.00937228830196421	-0.012918292167024
RNF207-AS1	-1.67265621121036	0.0108538635830303	0.0298482828242186	-1.49213084053738	0.0216863300595119	0.0465781388850355	-1.96295868521172	0.00372220668814149	0.010299079037473	-2.2992672861073	0.00106557203749338	0.0030911493954823	0.271687403544256	0.559436061978039	0.752792272234459	0.140572272267146	0.805525668860041	0.957035323093866	1.01054442987877	0.0742264316440332	0.13332424261694	-0.733881599274207	0.269971994114628	0.424156525749679	-0.50037243130582	0.436099185573697	0.610056091225486	0.315873965427462	0.601160400577975	0.787427941161351	-0.514350902001261	0.413592675574483	0.590880094433068	-0.728625614102301	0.164548713399959	0.258586761165891	-0.0544997262769606	0.934849538188973	0.999999999999876	0.316983796453615	0.63705803523364	0.814960256886376	-0.693543259650503	0.331101450795673	0.488084332343212	0.667650593907346	0.355008912381957	0.552229591141255	-1.05133411571353
RNF207	-2.15059848401489	8.09278454654213e-12	8.47624974778294e-11	-3.04708413444935	8.45540449256021e-21	1.10663766644647e-19	-1.97235498839482	1.69757916258111e-10	1.25647989506179e-09	-3.39707784409812	2.20790945765104e-25	4.431668223857e-24	0.116055645291327	0.623587726154662	0.817714646546163	-0.801668193169767	0.00748936959672615	0.0164077570426827	-0.476682499252474	0.114028702108665	0.194963608338132	-1.12056111693151	0.000289627692575891	0.000822771927001032	-0.471990849260429	0.120495672493681	0.205853673836673	-1.64590398565443	1.44795631916068e-07	5.87402204123952e-07	-0.439370591439435	0.146258990538433	0.243068201783614	-1.98494818152202	4.81683362490862e-14	2.27208117506866e-13	0.588671324307657	0.0817694473748181	0.149580850673446	0.238296494480199	0.487426880801812	0.656531284476449	-0.777400553049426	0.0277936225504299	0.055020917368641	-0.237363855572351	0.511404089247308	0.734909037260049	-1.01138967530359
ICMT	-1.27597404679488	2.81026640710515e-14	3.71844689838729e-13	-1.8205432230405	2.26507064073909e-27	4.37922710249689e-26	-0.928206293370607	2.95751286149082e-08	1.72325194323722e-07	-1.83832791018115	6.71444404738885e-28	1.52774130716999e-26	-1.48197488090963	2.67953113317549e-29	2.69811401128028e-28	-1.37813151927867	1.77502286249765e-16	1.41106295690385e-15	-1.28351929962312	1.87561804994391e-14	1.34473502193474e-13	-1.27489351688572	2.88284699145306e-14	2.0748691789549e-13	-1.16825502758111	3.21437899354412e-12	1.87153482704355e-11	-1.26731503659344	3.95554897006121e-14	2.77264084728864e-13	-1.56924519062132	8.44760366170314e-21	8.03610485599933e-20	-1.30476875205661	3.30796950082525e-20	2.12419707542533e-19	-0.143175957073004	0.450270772630436	0.633719981954733	-0.949988103266734	5.82316524287437e-07	2.14299599013406e-06	-1.17645795892135	6.24975113908996e-10	3.13049780649541e-09	-1.54122221994831	1.78970783929337e-14	1.88537977708967e-13	-1.1554666680317
LINC00337	-1.72071020432608	2.92846006298851e-09	2.34659318058335e-08	-2.01394877982268	4.96372525205935e-12	3.3619473763353e-11	-1.43571327324915	4.03067347538432e-07	2.0488208647017e-06	-2.28186088661819	4.35858229758022e-15	4.41083057491313e-14	-0.753531607102795	0.000661015473450407	0.00156696050493168	-1.13039880591582	4.88065271670256e-05	0.000147538941297996	-1.00347426530843	0.000381727233922367	0.00103580476168321	-1.24026434009777	2.03463800706196e-05	6.68533788314145e-05	-1.27313136016154	1.31192377385621e-05	4.22468883051254e-05	-1.65683885245587	1.82218713985591e-08	8.05146610070782e-08	-1.64016152372926	1.96822433250445e-08	8.0148931422037e-08	-0.709905847399052	0.00278077810365672	0.00587916041902727	-0.316416155733107	0.316233334474485	0.476438406050535	-0.897868634563087	0.00680945886310354	0.0147543499020081	-0.866762605012244	0.00925211806826856	0.0200494823371757	-3.34562837308406	4.8946073749994e-21	8.87890048282821e-20	-2.66964528019459
HES3	-9.33848515971788	1.3572415443752e-51	1.70510688382051e-49	-9.33848515971789	1.35724154437553e-51	8.41715964436889e-50	-9.33848515971788	1.3572415443749e-51	1.17206615779959e-49	-9.33848515971787	1.35724154437468e-51	1.02584133165682e-49	-9.33848515972095	6.71899461753242e-140	1.11258910538009e-137	-9.25848580969792	5.84230664645001e-58	3.58187451722086e-56	-9.3384851597179	1.35724154437618e-51	6.82466497888139e-50	-9.3384851597179	1.357241544376e-51	6.87474819121469e-50	-9.3384851597179	1.35724154437611e-51	6.34772463680142e-50	-9.3384851597179	1.35724154437618e-51	6.80594679742015e-50	-9.33848515971789	1.35724154437586e-51	5.54977558969512e-50	-9.33848515972018	1.75313980603154e-97	1.05200851441082e-95	-9.21800453547795	6.4564333287351e-42	3.58151722198377e-40	-8.99082150832842	7.47071315810638e-53	4.38115446734114e-51	-9.3384851597156	1.97836039784401e-35	5.40039201273361e-34	-11.2762583368397	1.06199401602709e-71	4.11191896189112e-69	-11.2762583368397
GPR153	-3.12965583457343	2.74848442329072e-07	1.72257076692296e-06	-3.76420128647751	7.70865248920276e-10	4.30738878202848e-09	-3.2645992100308	7.90033051897234e-08	4.38116826396685e-07	-3.41692709624193	1.94888981611317e-08	1.06223827689963e-07	-3.78030137379723	3.93236437521882e-15	2.07741456019482e-14	-4.16325701136488	9.08308409638812e-12	5.17217218357366e-11	-3.7328226798012	1.14807545108381e-09	5.64388758082087e-09	-2.86275228027523	2.78884392656504e-06	1.01006848801835e-05	-3.19053403881687	2.03906405296711e-07	7.87629967045608e-07	-1.91522990001172	0.00155453758195622	0.00389227667544079	-4.50011758918282	6.33454303950836e-13	3.65090969200689e-12	0.217187354690218	0.66968320500412	0.842499723057543	-1.13864325769141	0.0960880425135607	0.172319500058135	-1.11593011653882	0.103934177153992	0.175642043455556	-1.25390472585372	0.0679749104062582	0.123346700268678	-6.34355070285888	2.31173634157229e-17	3.13611400249426e-16	-4.25216386686498
ACOT7	-1.86513777957656	2.34508362368181e-07	1.48134147007031e-06	-2.83958668619912	4.24190561099958e-15	3.66875916540108e-14	-2.1017520036643	5.56402547177311e-09	3.50203692485205e-08	-2.1375658628447	3.12562058627467e-09	1.85107302423928e-08	-3.77122626938861	8.38434361345306e-40	1.26947167169931e-38	-3.66579552488763	3.75283810789997e-24	4.89711458843932e-23	-3.37713237206788	1.27858887483208e-20	1.37779415554137e-19	-2.43121787006407	1.75542236960951e-11	1.03152388587367e-10	-3.20656646472289	1.11058976287967e-18	1.01570045748591e-17	-2.79412682360318	1.13076420152649e-14	8.24925229150685e-14	-4.57631200495994	2.10097197638809e-35	4.28097377480292e-34	-1.71259434896794	1.89937195935805e-08	6.36719567471853e-08	-2.0982840308886	2.93300041044324e-07	1.35905524965515e-06	-0.297348564551286	0.466343047711763	0.632726563948494	1.26896329233493	0.00185383704358565	0.00451284522508441	-5.06654457674749	4.56786841911203e-31	1.69765854062624e-29	-3.88548913041795
AL031848.2	-0.914264149538415	0.123569881844685	0.244423202910154	-0.74239086115315	0.204179066456401	0.338151403912776	0.248662113252949	0.644265218573712	0.848571161325185	-0.0433911607171492	0.936444022698888	0.999999999999901	-1.36980578794758	0.00385475837456106	0.00833055180632442	-0.502283402905454	0.370224993779072	0.530581286560893	-0.860410794400415	0.15084515630207	0.248809381996114	0.464833569984736	0.423480641698384	0.609873145401051	0.0937179719893105	0.874983760862626	0.999999999999893	1.03031089472092	0.0580089643084265	0.107554635437341	-0.722920786727234	0.238127400857765	0.372022632228553	1.21897920994051	0.00701424261463139	0.014072386763612	0.798112856849515	0.17951597621839	0.296061940524165	-0.176272292723855	0.785222524982917	0.937779423215258	0.0371242935415856	0.95521356032609	0.999999999999922	-2.72529130364308	3.57856594633329e-06	1.58977447199234e-05	-1.77125607333607
HES2	0.806550270987096	0.352333996392069	0.56362223534736	-1.33343027118203	0.160115500579616	0.274625646546033	-0.68490372077852	0.453051500420905	0.659459932373422	-1.764892739908	0.0715970608441053	0.14009241259655	-1.90896396542743	0.0104812625599183	0.0213343936278621	-0.0497565016116305	0.955234411284081	0.999999999999901	-2.09324220661237	0.0403750180577397	0.0772449275631641	-1.56214878904896	0.115444731754755	0.20425032036768	0.230584459889163	0.800921813848076	0.949007769044839	-2.09324220661236	0.0403750180577401	0.0777304665794534	-1.43077904524569	0.142757861479827	0.238075778575593	2.20020010761327	0.0025694273911608	0.00545280618699894	0.974726866922799	0.318546573730069	0.479296190526829	8.42853570225088	2.48833106835133e-19	2.45528292134979e-18	8.49626051782902	1.28421096598375e-19	1.36494861353728e-18	-2.23828265956228	0.0310000370990274	0.0693051612687188	-1.89136196191398
ESPN	-1.35702650059225	0.0233307207113544	0.0585586213731269	-3.31515378697881	4.68507668164009e-08	2.18566124333085e-07	-1.10390964927923	0.0645010032277769	0.130995910807451	-2.94671233416795	1.00839950127825e-06	4.49786160215147e-06	-4.63074607099031	1.68527839686173e-21	1.22113008498494e-20	-5.20947298139663	7.88841499220707e-17	6.43375987890799e-16	-4.65440629815232	1.23108863767999e-13	8.28369045353929e-13	-5.43742873977243	6.18368002100046e-16	5.01463794896656e-15	-4.33229375621765	1.27296573110035e-11	7.06178299941131e-11	-4.5739761961065	8.48006127986426e-13	5.36170063816019e-12	-1.92494669435201	0.00135814066112209	0.0033138632131379	-5.48010422316649	1.44163467935904e-23	1.06712993234168e-22	-6.33525359943488	1.75126272241197e-16	2.05121303976125e-15	-3.59051818980049	3.22748464626356e-07	1.21947345813547e-06	-3.83245857215552	1.07721618052951e-07	4.38913254200642e-07	-7.49338935612327	4.77342566258461e-22	9.39118317465677e-21	-6.96396916839303
AL031848.1	0.191467983734618	0.746424693244753	0.945151138850084	-1.78934765626146	0.0145193373069989	0.0324078951435704	0.110554828234513	0.85393556784245	0.999999999999893	-1.77344338831445	0.0126838540418201	0.0298727334127738	-1.95520928919541	0.000365479160760023	0.000890557543599071	-2.08690458154709	0.00813577982393547	0.0177084268099006	-1.95239339401876	0.00994800470869998	0.0215337553932941	-2.08690458154709	0.00813577982393547	0.0184489066858818	-2.08690458154709	0.00813577982393547	0.0178790338005694	-2.08690458154709	0.00813577982393549	0.0180274806052745	-2.08690458154709	0.00813577982393546	0.0175692891706799	-2.08690463033473	0.000783426767386095	0.00176862940452154	-1.96964966827588	0.0235807918524571	0.0492879614953066	-1.55939539851108	0.038859966526239	0.0727981204915792	-2.06335846443247	0.0178231453461053	0.0366608117361419	-2.62101109267158	0.00349958179646772	0.00966780193694049	-2.36774386389963
TNFRSF25	-0.0453958438350567	0.943711290065997	0.999999999999893	-0.250122884375633	0.697305629407504	0.892408207129631	0.640211586078962	0.318908720496618	0.502679232184287	-0.622772147003286	0.33292264122784	0.51868446329208	-1.19450923777732	0.0184165212561856	0.0360945445299265	-1.69273326695156	0.00853712504371262	0.0185145191544277	-1.38317794876875	0.0318592458645869	0.0623509042443526	-3.21569068541557	9.88393347213507e-07	3.76291133202888e-06	-1.52871230162673	0.0179513270441264	0.0369758355026991	-2.10133129648573	0.00116719203773301	0.00297655079017407	1.34002580350505	0.0369337418868516	0.0706806937647929	-4.41588363557358	3.10061519373908e-15	1.5586477131723e-14	-4.07544139522124	5.11120798912184e-08	2.59303055010583e-07	-7.14307887860942	1.64522681338585e-17	1.43861499624383e-16	-5.8494126314317	3.12092724632536e-13	2.06399713405448e-12	-3.68589322085826	2.4771363692264e-06	1.12587790506252e-05	-3.27884682263905
PLEKHG5	-2.12560321698315	0.00119521151120017	0.00411472969568999	0.156578487372462	0.810979996530379	0.984775965763732	1.24615202590719	0.0568995075837138	0.11760061429586	-1.75916762544101	0.00727621170779216	0.0180656053452256	-1.10683640193798	0.031761350220115	0.0598400323736868	-1.59729481447038	0.0147309309312953	0.0305160088193031	-1.28996782908224	0.0489798270972654	0.0917942418416961	-2.67904549318244	4.59603351088682e-05	0.00014445999286688	-0.904675951274484	0.167343848369394	0.273646324139753	-2.30122997075291	0.00045405876457867	0.00122990847310067	1.36114839844488	0.0375481339046188	0.0717401011678697	-0.775524512120038	0.161253469183761	0.253944129361963	-2.06743591625543	0.00544174374534976	0.0130099392809188	-6.30423380481578	1.1825366391644e-15	9.09525638063745e-15	-7.51368372358348	2.54300489610615e-19	2.64905295785686e-18	-5.28984123903928	2.09244966890748e-11	1.65368989476631e-10	-4.95221759591522
NOL9	0.229378840383916	0.146606151244556	0.280931190066898	-0.734316964827152	4.38869274467232e-06	1.65145261873228e-05	0.183910998678997	0.242566875535225	0.402209052922543	-0.739162163442028	3.52910294143217e-06	1.47039876473642e-05	-0.329069703602686	0.00852098673293599	0.0175572256079901	0.122685494941944	0.433853003436074	0.603623197630385	-0.179048410712851	0.257952318897876	0.395296443073147	-0.186269688655173	0.24088832085581	0.384989947624743	-0.186481846935932	0.241135284986265	0.374084779693789	-0.410385294405772	0.00978811569103287	0.0213452280905813	-0.326358287178591	0.0401213999562104	0.0761931721137628	0.128985872724295	0.335365694965961	0.483392830054657	1.12653605797405	2.14134835429099e-10	1.42585759599555e-09	0.20722821289873	0.250178346151587	0.378049063230057	0.2124970846562	0.238546078476071	0.368229157997943	-1.2430019575077	2.29262561264849e-10	1.64734949900634e-09	-1.10501884397024
AL591866.1	0.865615217691341	0.0841268140742832	0.177707643163711	-0.831712005606559	0.133826627120696	0.235121324727035	0.612640137703809	0.222517298067932	0.374859115864297	0.108808019229825	0.831237978154211	0.999999999999901	0.498847850286314	0.224425881750037	0.35092059851333	1.15182373613959	0.0180770932717293	0.0367923268747995	1.00019153578892	0.0452948473952479	0.0856045185798136	0.949928776507862	0.0700301514976547	0.131042068716725	0.168996138353583	0.759190367049495	0.914190765991562	0.84112129629264	0.105688702497387	0.183916641733987	0.663768329913047	0.200823648378268	0.3206827433071	-0.513688742239308	0.277694706329652	0.410222051377289	0.473311005590304	0.410868006144959	0.588856535437549	-0.795264821006477	0.199864642577116	0.310975955847805	-1.29835356452535	0.0559203513760754	0.103692743511685	1.23383729263875	0.147446201441631	0.269258755073967	0.00417451557126996
TAS1R1	-0.76099303435728	0.261661106433614	0.448072709247947	-1.84425628802119	0.018143149542178	0.0395867646731518	-1.84835546453607	0.0178942982609559	0.042301804144043	-1.86513540099107	0.0169067671638244	0.0387836604550519	-1.66953493923903	0.00287716633517552	0.00632807882461354	-1.91000424340505	0.0144989343677679	0.0300676049117738	-1.85249234098952	0.0176462183387656	0.0363993228306301	-1.98661605904636	0.0142833564993136	0.0309375723790488	-1.50037161321293	0.0533847097716606	0.0994217605852363	-1.57743374246763	0.0424904086093216	0.0813488198224182	-1.45857519488083	0.0533420847032476	0.0986381813026671	-0.228631364725913	0.681090749425733	0.853402327942001	-0.514834420649339	0.495728647473154	0.685169693527423	-1.04815850799466	0.172346679217798	0.273971698846822	-0.30469282366045	0.682397668012479	0.862330968878184	-0.0699304462204937	0.939057366689855	0.999999999999823	3.44464017286026
ZBTB48	0.901920370610122	8.91714988223134e-09	6.74274706238133e-08	0.548691730359503	0.000482392040225126	0.00139378510105185	0.560957530449445	0.000342849054899542	0.00114712854556521	0.293699030033417	0.0619413359144586	0.123400528898732	1.05501609130652	1.58177875549627e-17	9.46524630932752e-17	1.19583230697061	1.6409706117929e-14	1.14033431122336e-13	0.967984063444894	6.20821313618017e-10	3.11848280411676e-09	1.11642684361343	1.00234733061477e-12	6.43740672116678e-12	1.09089509182592	3.37597324586558e-12	1.96223512015445e-11	1.07503828164571	6.31340957852329e-12	3.73623813907172e-11	1.14691298369056	2.30205322506452e-13	1.36684940046699e-12	0.0303323211613125	0.820653544422582	0.96567888965674	-0.355916663058665	0.0475036011104082	0.0921788268903346	0.85088315289586	1.81222331091291e-06	6.30266780470058e-06	0.730015776582624	4.33149024994723e-05	0.000131812217237283	0.595884407764155	0.00161666663889098	0.00476011232445884	0.841267665642621
KLHL21	1.29800405338314	8.24321767202427e-10	7.0045848744992e-09	1.55171811021056	2.03163280000349e-13	1.5389316228401e-12	0.729169975114111	0.000562856816032339	0.00181151920821146	0.87073970557703	3.84190460613081e-05	0.000139571503029771	0.863841901604912	2.25302765983873e-07	7.33493243465777e-07	1.25956478087151	2.34430600061409e-09	1.09165493037837e-08	1.04940569140903	6.87000346558701e-07	2.5899742292781e-06	1.07854064198414	3.3981364652472e-07	1.35793519399755e-06	1.32630552413404	3.51338855174445e-10	1.73491464581594e-09	1.05395684361519	6.15300035799816e-07	2.35115092954829e-06	1.44982180831094	6.68436840684604e-12	3.58314442535864e-11	1.98900982473427	9.26368308570383e-29	8.34522400495475e-28	1.61222252883736	1.55943496107924e-11	1.16034590148475e-10	2.17418351791574	9.41985025075996e-20	9.54202084380092e-19	1.88386728747105	3.38045649437008e-15	2.5822419036431e-14	-2.06399743823485	3.73788314136648e-16	4.57070634089382e-15	-1.75304396986947
PHF13	-0.370528070014174	0.0736999619601476	0.158756217935678	-0.71048312502096	0.000611702605886778	0.00173751556985092	-0.877973752144676	2.25629164093092e-05	9.12894631628728e-05	-0.509182461147453	0.0139570778668785	0.0325873987669907	-1.71674897765482	9.50140144968512e-26	8.235712310493e-25	-1.74808210825582	3.36445489036562e-17	2.81523571028639e-16	-1.7036659157515	2.7314472102517e-16	2.22700650432337e-15	-1.93568041346499	1.93879832153516e-20	2.13975567436961e-19	-1.98075620162105	2.85777318178725e-21	3.06105741016064e-20	-1.73495726777938	7.99667188343374e-17	6.76829940436767e-16	-1.75411104408859	3.96867806109136e-17	3.01329247918965e-16	-1.75875308020011	1.6723744993787e-23	1.23414073867891e-22	-1.99265430923415	3.80594984362692e-17	4.7117119476981e-16	-1.46150697118331	7.04563162233566e-10	3.41742171505627e-09	-1.57136338547523	3.64992978230034e-11	2.03602621907636e-10	-1.36388480287924	4.76562440244211e-08	2.675467077468e-07	-1.13406362691966
THAP3	-0.430391025490089	0.00208114398088028	0.00679150246803743	-1.04106394635396	1.32320445535521e-13	1.01550641153257e-12	-0.562817910513799	5.41014310717953e-05	0.000206112533231583	-1.03384304943606	1.7550588035797e-13	1.54950647026028e-12	-0.945727508195842	9.96765276150878e-18	6.01766194214195e-17	-0.859403894296833	6.41643479798337e-10	3.14152024780212e-09	-0.83503772371517	2.43967799241715e-09	1.16293401189589e-08	-0.885031836974073	2.92806544346578e-10	1.54712517418646e-09	-0.881189353474692	3.66180750158717e-10	1.8065044485898e-09	-0.558736944817357	6.31195264129599e-05	0.000192919900949142	-0.846119368672045	1.60885406307483e-09	7.1518276677596e-09	-0.331443060567292	0.00500325602943146	0.0102427302989848	-0.1576760514484	0.317849107091837	0.478474196818844	-0.486295653112292	0.00226720951948939	0.0053116278581061	-0.550148413617217	0.000561204609557892	0.00147225585372797	-1.32244768003437	5.38083083512343e-15	5.91791166842201e-14	-1.37630037110432
DNAJC11	-0.49563816587457	0.00545090669746061	0.0161665398171625	-1.50840124973227	3.34471732905774e-17	3.37986236387111e-16	-0.753963366933329	2.33842496049388e-05	9.44426982377305e-05	-1.41641815777129	2.24202322623448e-15	2.32234238806511e-14	-1.26800613719496	1.75634504233198e-19	1.1569771073829e-18	-1.12454386838103	2.71990892219807e-10	1.37223773772932e-09	-1.0616133023812	2.69302786636842e-09	1.27853407576641e-08	-1.32410516279461	1.2780837489773e-13	8.77942987635319e-13	-1.40594699836384	3.83249794228656e-15	2.74963100394578e-14	-1.20243090561037	1.6337285936901e-11	9.33161276664320e-11	-1.46889149615894	2.0834175082617e-16	1.51345780338104e-15	-0.986727448389522	6.11921507383668e-11	2.41648161114645e-10	-0.721437615794394	0.000359541682436725	0.00106900012027066	-1.5148320354169	9.33025924525573e-14	6.22133420676123e-13	-1.28568676037818	2.39735848898037e-10	1.24716108735052e-09	-1.5871869001796	1.25090888718821e-13	1.22110318462719e-12	-1.71190266807719
LINC01672	-0.0530725223359805	0.948920899667623	0.999999999999893	-0.0530725223359795	0.948920899667624	0.999999999999901	-0.0530725223359804	0.948920899667623	0.999999999999893	-0.0530725223359804	0.948920899667623	0.999999999999901	0.192519278655105	0.761485194965142	0.937391682941799	0.153854108984313	0.842614885720746	0.982611999584167	-0.0530725223359803	0.948920899667623	0.999999999999901	-0.0530725223359798	0.948920899667624	0.999999999999901	-0.0530725223359803	0.948920899667623	0.999999999999893	-0.0530725223359805	0.948920899667623	0.999999999999893	-0.0530725223359803	0.948920899667623	0.999999999999901	0.614485095248475	0.352514434888747	0.503495475602117	0.430301157675352	0.611713638995409	0.802010120908164	0.861435833625206	0.257271808695389	0.386965619425275	0.583423995023198	0.461948752450995	0.639571095276959	-6.24299615456841e-13	0.999999999999507	0.999999999999823	-6.25317571976675e-13
AL591163.1	-0.180918378339892	0.82065489318753	0.991211107149232	-0.180918378339889	0.820654893187532	0.992091246767644	-0.180918378339892	0.82065489318753	0.986494177257211	-0.0614168246157161	0.936175151636465	0.999999999999901	-0.100195702806955	0.867619907645169	0.999999999999831	-0.102222693676225	0.894001349550402	0.999999999999901	0.176555384947341	0.807062731679221	0.960357925606244	-0.18091837833989	0.820654893187532	0.984025064403363	-0.180918378339888	0.820654893187533	0.96524676152236	-0.180918378339888	0.820654893187533	0.967028592548694	-0.180918378339889	0.820654893187532	0.971645269927562	2.47083050655879	1.15185265531173e-05	3.11494711559793e-05	0.252330679302964	0.757472697071483	0.936550027241891	1.23911788239035	0.0760625966822367	0.132998461725351	0.895964988517738	0.227306313179414	0.353418490177739	-4.19160939689256e-08	0.999999966727838	0.999999999999823	-4.19160930078976e-08
CAMTA1-DT	-0.498429478786437	0.264760185502008	0.452215681319003	-0.587400075232597	0.190985464269847	0.319473679477326	-0.880865667863577	0.0534814654586161	0.111295827299381	-1.45788619488026	0.00207844890365814	0.0057255585886478	0.268968514244987	0.434488087734236	0.615751196553915	-0.198588952956657	0.640808400975067	0.817108413653704	0.39717893841031	0.352393614107911	0.511996050375711	0.0689082185693676	0.882015427010252	0.999999999999901	-0.590524100607623	0.233350291353389	0.363631699688583	0.220770886846984	0.622711954702885	0.80703640403284	-0.158084004032259	0.72762507609515	0.908437419175395	-0.958381506012274	0.0157494898657163	0.0300217796582133	-1.83645348334807	0.00145172067265462	0.00387049090267772	-3.55038734368987	1.37035974613583e-07	5.36772607671344e-07	-2.3767649461525	0.000152320368857146	0.000432915259802319	-0.194349852261058	0.723964648357974	0.931391946359605	1.52426477862096
CAMTA1	-1.14825781501559	5.67852954028698e-12	6.05637163907284e-11	-1.32781093188225	1.77998310339752e-15	1.58861849927395e-14	-1.48026127539592	5.91001359789597e-19	9.01133997171762e-18	-0.918279745472919	3.23061172419726e-08	1.72374124128165e-07	-1.47356113554222	2.67472411472119e-29	2.69382151431979e-28	-1.69103987704845	2.09143806403263e-24	2.76493942255945e-23	-1.64495509962633	7.37782754718318e-23	9.16506553517956e-22	-1.33252878693147	1.4843115056826e-15	1.16862956485001e-14	-1.37118554395924	2.51232628281362e-16	1.96027017874574e-15	-1.1813115990102	1.25730779558161e-12	7.86641699866074e-12	-1.64225536509538	1.10632276196985e-22	1.17103174977609e-21	-0.269203647416228	0.0545473558502502	0.0951539759718861	-1.33942039205031	1.39350323493319e-12	1.15206276259266e-11	-2.27098273621515	5.2027283959759e-31	1.05610695620862e-29	-1.77737380494271	3.50432099850357e-20	3.8675246007142e-19	0.604707189596904	0.00301135672109867	0.00842448667068627	0.949629429653115
AL590128.1	-0.0200230413485493	0.970654376063818	0.999999999999893	0.255625507045568	0.631139681230901	0.831876947185806	0.473048981939987	0.363986641699365	0.557547084569457	-0.272108366258402	0.61907901933688	0.832940489037991	0.12362649210196	0.777169631972409	0.949545829494014	1.2061849074953	0.0127143535050599	0.0266848065819275	0.87751300826693	0.0863271310109584	0.15239963170662	0.673758009090596	0.231615678573344	0.372125189970386	0.671816641198543	0.235014920514796	0.36586361929794	1.16471122745661	0.0280310058184844	0.0558480164430279	1.06595837451477	0.0420259156770737	0.0794792250780784	-0.0215541311330151	0.96438498047071	0.999999999999938	-0.925316940701239	0.173935549770794	0.288027047009808	-1.15922240660389	0.11238306979091	0.188303915320585	-1.98362458580987	0.0225749875436509	0.0455111959811912	-1.06049372598866	0.189463547197705	0.331752588463431	-1.96676740538773
CAMTA1-IT1	-0.0135030895969074	0.983658037405386	0.999999999999893	-0.339195833157218	0.628361182285733	0.829305711166257	-0.685387843590407	0.358712707195666	0.551184443100698	0.524692887789803	0.399575903125048	0.600307011673643	-0.501706172962026	0.363799734303421	0.531973438231983	-0.825194837878818	0.28923006754738	0.43206629789583	-0.825194837878818	0.28923006754738	0.434689804805487	-0.0878288383792847	0.902428115644605	0.999999999999901	-0.446945625083231	0.548488533673789	0.732449972158109	-0.0797958041779072	0.911299621299983	0.999999999999893	-0.825194837878819	0.289230067547379	0.439082540091306	0.015778440563809	0.978692389864575	0.999999999999938	-0.825194837877661	0.361852059103004	0.53119882276321	-0.817138593283509	0.335050895789496	0.485380907446285	-0.801310999302971	0.344438633273188	0.504741934708252	1.04746274849388	0.274878542676667	0.451067801028893	-1.15783560380263e-12
AL359881.3	-4.1970566264518	3.62062172422089e-12	3.93437562427012e-11	-4.78918912573186	3.01394978931705e-12	2.07831494167689e-11	-4.95630199678749	6.28060585108415e-12	5.35324753857203e-11	-4.38375054582362	5.53927560968977e-12	4.25995833175712e-11	-4.59655173750469	9.27970830357816e-24	7.41882186046275e-23	-4.95630199678749	6.28060585108411e-12	3.61822794767424e-11	-4.95630199678749	6.28060585108415e-12	3.70502130285968e-11	-4.95630199678749	6.28060585108411e-12	3.8004972083374e-11	-4.95630199678749	6.28060585108411e-12	3.57743854561269e-11	-4.95630199678749	6.28060585108415e-12	3.717290797991e-11	-4.95630199678749	6.28060585108426e-12	3.37193947652052e-11	-4.77960434989916	3.91984945448635e-19	2.39215201195223e-18	-4.95630199678522	8.37779627382301e-09	4.66676055965728e-08	-3.88114652801738	5.40531909393118e-09	2.41213063289416e-08	-3.88565258122874	1.91795519290113e-08	8.38334377935335e-08	-2.20853121558977	0.0129026172009657	0.0317190178882133	-1.94370497866821
AL359881.2	-2.85670641318692	3.03232938876556e-06	1.63682028724853e-05	-3.09195093238219	5.21066993299073e-06	1.94442441308772e-05	-2.9275337954628	5.01806757227494e-06	2.22912597407739e-05	-2.67180644289916	5.48380291789857e-06	2.23120530362106e-05	-2.8664664988758	2.86375135960007e-11	1.22219803090388e-10	-2.62768351927443	1.69684782558971e-05	5.41828634677214e-05	-3.09195093238219	5.21066993299077e-06	1.78712235301023e-05	-2.63047858834875	3.90422369124182e-05	0.000123817617922009	-3.09195093238219	5.21066993299073e-06	1.75348304926041e-05	-2.01155021636861	0.000338641922994686	0.000936230160160364	-3.09195093238219	5.21066993299073e-06	1.70124012330292e-05	-2.9184720150046	5.14964545768324e-09	1.79090121437771e-08	-2.97253775436238	6.64759494181264e-05	0.000222003099743463	-3.0575939807022	1.11828942241149e-05	3.5603062502757e-05	-2.85963499611658	1.46670582623507e-05	4.71771090129392e-05	-2.39728753678564	0.00306989868427834	0.00857276201155196	-1.42193103662188
AL359881.1	-2.66484891334939	1.28148775527088e-05	6.29640494026739e-05	-3.30104418367105	6.65149561945139e-07	2.73948742102786e-06	-3.42635601600729	5.91184964205878e-07	2.94887055482504e-06	-3.57515345604436	5.32647161855536e-07	2.46302850209711e-06	-3.3427514950576	5.56204618816892e-12	2.47112768146474e-11	-3.34362749741571	5.11804199525383e-07	1.92860516815778e-06	-3.62910823229189	3.65647852295541e-07	1.42319629538882e-06	-3.21975649783159	5.64203077218654e-06	1.9735158497068e-05	-3.70168734703894	6.98233072640311e-07	2.56373382450916e-06	-2.65368484988678	5.77864893536291e-05	0.000177377373292441	-3.70168734703894	6.98233072640311e-07	2.47186976162396e-06	-2.78338395764438	7.30802925702159e-08	2.35401926954853e-07	-3.22105128853216	3.88901718619443e-05	0.000134701379957877	-3.6937107748299	8.03869187986286e-06	2.60118466296906e-05	-3.7016872614709	2.90960466114927e-05	9.04261542241583e-05	0.0050089043073823	0.995180100725384	0.999999999999823	-1.22724178111637
VAMP3	0.617046668923322	2.52246357518584e-06	1.37781697387897e-05	0.370576232047546	0.00472348024825936	0.0115866587245969	0.66842020195241	3.23427439467004e-07	1.66460470234287e-06	0.510181680034132	9.83634240002948e-05	0.000339019159897846	1.0091885080553	1.42014210150793e-22	1.07858038944254e-21	1.17932391590443	1.54850716110394e-19	1.50776845620131e-18	1.06447807697217	3.84345555977543e-16	3.09865792988361e-15	1.27035740147413	2.51984583089748e-22	3.14155933963928e-21	1.25062628903827	1.12344918505921e-21	1.2341481198754e-20	1.39186322196983	1.61841420551614e-26	2.49344526503477e-25	0.983527117093935	5.42489866811536e-14	3.36261690508386e-13	2.15250981197631	2.06527616153804e-84	9.09547621541354e-83	1.59043402177971	5.4718306328084e-27	1.39469720296535e-25	1.67194694677002	1.29396600631018e-29	2.43833485097381e-28	1.9027380174958	6.55733722308826e-38	2.03572298215335e-36	2.37861832589691	3.21166273131007e-49	3.59500740376525e-47	2.25481031022111
Z98884.2	0.949218816028668	0.0216043610785501	0.0547667668025184	-0.0616476837485049	0.889511184852227	0.999999999999901	-0.411638048585249	0.366167724260801	0.56019771961742	-0.45201382865772	0.313950296656087	0.494745820307041	2.05055476027546	3.56703218453048e-10	1.41546309600295e-09	2.23449525240106	6.60928615285291e-09	2.96963588214707e-08	2.00672604499407	3.81947442952779e-07	1.48282051829493e-06	1.72148142306314	3.77758045983483e-05	0.00012001372624694	1.69280273635668	5.45745278145058e-05	0.000163284581351267	1.18164984801372	0.0056305124635827	0.0128338408242741	0.777989088242362	0.0722350865406959	0.129670384133042	-0.931419549887914	0.0243008503610467	0.0450227124445995	0.687275947671667	0.147196992717492	0.248987638795301	1.81291531646833	9.35623336781012e-05	0.000266571572206499	1.04462977720156	0.0386685357555256	0.074192181519448	1.54670680344712	0.0168615692208052	0.040312275801355	1.58854399040323
PER3	-1.77460464099646	2.34397419092148e-09	1.89542589268995e-08	-2.31170354437505	8.91107054454418e-15	7.48489695174919e-14	-1.7409828006361	4.03725480750974e-09	2.58411660355471e-08	-1.99601157363679	1.7380590495505e-11	1.27890371773511e-10	0.217234567469008	0.348394245926756	0.512823983531919	0.279079434537321	0.342096852506271	0.497258062029684	0.303980257755515	0.301375153417777	0.449784656802361	-0.420935842223964	0.153408889252407	0.261448432779418	0.109368984466339	0.710322953301609	0.873698712246331	0.0655553510141288	0.823710764510219	0.96903407922619	0.591831244779782	0.044142829453727	0.0830734939762347	0.461944615631526	0.0632978416284909	0.109088457042793	-1.63988544200617	1.07617131788383e-06	4.63546288191396e-06	0.57065576004303	0.0872215683839477	0.150382715443363	0.776904377298573	0.0198222840518693	0.0404308072734343	-0.67086223765724	0.067255025139843	0.136847969956096	-0.984207015909632
Z98884.1	-1.75888524930133	3.00827974056778e-06	1.62513849617109e-05	-1.73084121999304	3.91674727353517e-06	1.48390363301e-05	-0.943362810452996	0.00730665804202012	0.0189539963711469	-1.44782636478037	5.60883558462778e-05	0.000199761598980415	0.780013650569551	0.00346535689070703	0.00753340439147293	1.02816750540944	0.00176950079097972	0.00430823745530814	1.22544049305572	0.000222804087123822	0.000624649478755107	0.825350253316642	0.0151910356779264	0.032714627764595	1.11231490855292	0.00097095120983316	0.00246784085546887	0.923570494966296	0.00608625950587454	0.0137941608372035	1.36887983012282	3.82821940282836e-05	0.000113769402944656	1.23349266322018	1.32264369985678e-05	3.56065554791614e-05	-1.59046414883934	0.000195481786044733	0.000607533783506476	1.54060478360177	5.14246538741873e-05	0.000151225103729175	1.97424132123733	1.62591963522126e-07	6.49602626885755e-07	-1.8375434428616	0.000476299309878716	0.00154028551384548	-1.12830414632877
UTS2	-0.787115140491372	0.155106154228509	0.294223331752151	-1.80276331330108	0.00123603520484171	0.00334007770313434	-1.45143620417981	0.00887045920854759	0.022545810149807	-0.117214431015168	0.831320358719679	0.999999999999901	1.31600666604863	0.0023418210905747	0.00520403518920305	2.23378621183316	4.51724297409133e-05	0.000137050046654365	1.92579231356533	0.000442273411871732	0.00118902305076815	0.580357278156701	0.291485379350246	0.451750040218809	0.769845290121006	0.161526307240999	0.265613666195888	0.945379386224666	0.0851414968962991	0.15173277329248	1.20886891571589	0.0276444347349819	0.0541504045934512	0.564727880069832	0.224540936410321	0.340257921890884	-1.28072429755927	0.0421273048949164	0.0828298410403896	0.644261476343109	0.302754588536931	0.445321427587214	1.02364122939118	0.100950017536302	0.174896943962071	3.38284053779721	1.08130542523565e-06	5.14428687399097e-06	2.15190629750775
TNFRSF9	7.26658968195882	2.38550774229911e-22	6.03234631814685e-21	6.90106026378582	2.75867603937168e-20	3.48603542456965e-19	3.64475754230508	1.86003955039818e-06	8.71376114239434e-06	5.42254417298536	5.10670116300088e-13	4.31788944866005e-12	7.81589634706563	3.36667763639813e-34	4.15783428425312e-33	7.83402633838294	8.52666965231133e-26	1.22646622388122e-24	6.60379206678195	1.12858687129685e-18	1.07891566650677e-17	11.5542263597629	3.41895300552454e-54	1.90316471503151e-52	11.0159281858825	2.04917379208511e-49	8.83989245814835e-48	8.22007249025602	3.28937354464388e-28	5.54335134243107e-27	6.38814068323028	1.57951765242508e-17	1.22977639466857e-16	5.59738676020254	8.7026056289906e-17	4.73011552571215e-16	9.28094781016599	5.54103226493977e-30	1.70182607695658e-28	8.29120332473796	3.63305246411673e-24	4.93133304716531e-23	8.73242844150581	1.14415662203188e-26	1.92488181802069e-25	7.12413503158826	6.05545323012015e-12	5.06806244208337e-11	7.64163303866938
AL009183.1	-1.38865510610868	0.0622321473264209	0.137271069029099	-0.0968319520932245	0.87881478765439	0.999999999999901	-0.299915385634402	0.641088889878017	0.846075721361689	0.0213036053656052	0.972308635190898	0.999999999999901	0.770960373529623	0.111006182539111	0.187500924662047	0.729421504194883	0.206057996577321	0.323288903361273	-0.595889095252731	0.362848367024092	0.524490185508931	1.60186101445455	0.00750681843537994	0.0171302636180127	1.51357253850535	0.0115290793023877	0.0246436091681472	1.16298725548523	0.0561299952421732	0.104386322254116	0.438481868048242	0.490109028526115	0.675077423528397	1.68364618506381	0.000738663176818136	0.0016723439987989	-1.27955440748547	0.132081560300972	0.22689785981287	-1.11625650855065	0.168080649299917	0.268095495539739	-1.2054968620073	0.120140453898247	0.203994921605828	2.74737701402021	0.00126632582225421	0.00380832958972573	2.5684793044757
PARK7	0.0129725558892023	0.940696969548281	0.999999999999893	-0.20466124086478	0.240560985915273	0.388302741980762	-0.202937416087906	0.244256032501604	0.404444664359504	0.019835799166399	0.909377426018822	0.999999999999901	-0.593585213578587	1.54153010268318e-05	4.31982663085505e-05	-0.61067019283347	0.000454579549834581	0.00120754401780056	-0.608942150467384	0.000482704769817451	0.0012909757190457	-0.164170819417409	0.346452852993957	0.519625569201187	-0.276753181928996	0.112643466749833	0.194039072236229	-0.0254517081819813	0.88387859637884	0.999999999999893	-0.853571399166144	1.02042134901106e-06	3.56498930490482e-06	-0.261767455419577	0.0758544167649958	0.128580319682709	0.566852258450257	0.00408095365615107	0.010005517687439	-0.646551542411135	0.00110515912594517	0.00270891105835552	-0.486845519479885	0.0139543152652249	0.0292679455376541	0.391135028981969	0.0663416841683253	0.135216695506523	-0.279188399599208
Y_RNA	-0.39982999496839	0.0127461761107469	0.0344111059577844	-1.05119302153257	7.33400051425755e-11	4.48108635690515e-10	-1.19439808822233	1.13771986687549e-13	1.13740684342005e-12	-1.05406688873684	6.02757622683723e-11	4.21529485066933e-10	-0.50897797373076	5.57697018468181e-05	0.000147871992081498	-0.360735514354568	0.0237004935899223	0.0470827095041195	-0.358608613206684	0.0251652793056979	0.0502879355498213	-1.28886306526235	1.78872123013001e-15	1.40122772575027e-14	-1.04598549026719	9.92888290310534e-11	5.12523922734113e-10	-0.932363143909819	6.88049184310338e-09	3.16016506710214e-08	-0.456864022420504	0.00440999426784159	0.00993131530345909	-0.391378139184457	0.00391826536062438	0.00813263667284876	-0.706444594623173	0.000104802835354373	0.00033965856526253	-0.379068117579552	0.0379617045779699	0.0712597313188216	-0.429051443148241	0.0189288423398093	0.0387504345871652	1.20021997883923	1.46079089691522e-09	9.67925089038917e-09	0.818698243397998
AL034417.4	1.53221364334117	0.00824040759667112	0.0233266694818694	0.755834307634716	0.202544483271881	0.335870703414717	1.09007028670068	0.0618416310074887	0.126366445641768	0.166588515225911	0.781685432479055	0.968089629435375	1.65280257725746	0.000425363896236709	0.00102918398409694	1.95491457144472	0.000575067694975137	0.00150528948100824	1.93930230032472	0.000762471025513146	0.00198423772956463	1.97830975171555	0.000778878060151878	0.00208492437627839	1.29901597450493	0.0319672746465283	0.0625637285580899	1.78938973502416	0.00230897897267385	0.00562705668535287	0.687369725195643	0.260468582315591	0.401659177288153	-0.261265093488228	0.624374047371337	0.800517644756436	0.706147613038583	0.293366420718866	0.447821922470543	0.712690389506362	0.30198211211444	0.444374530026202	1.23898505336109	0.0729570815927776	0.13141563086541	0.399906321487959	0.607507411249491	0.81632367694089	0.168217205338246
AL034417.3	0.390782467375383	0.59498514421929	0.818062990679863	-0.474744552898212	0.560579044487755	0.765170860323547	-0.458772333153125	0.573773025931681	0.785079988006106	-0.491335120997831	0.547036439577061	0.762587714457095	0.370108338525846	0.537623939436973	0.729708286240034	0.945776032895412	0.173011367901515	0.278227357031249	0.297142347145675	0.691272260599544	0.863630596399229	0.96390188683744	0.203046933471785	0.332464181458575	0.0783725849819449	0.920724479748586	0.999999999999893	0.418576893761938	0.587143970770515	0.774329101214105	-0.334534824833062	0.68124536745647	0.866136151601226	-0.61765824848112	0.373653458527542	0.528811631939471	1.63956419066001	0.0266766923008022	0.0550512492162997	0.472386689786919	0.556917755922601	0.730949261290112	2.10821021506732	0.00488926644550168	0.0111391123387485	0.344329941429143	0.743507701520318	0.945057513606793	0.582893938973063
ERRFI1	-2.29471833873386	7.12550357875319e-07	4.21630229925547e-06	-3.52732905383481	3.29514752519629e-14	2.65891490547155e-13	-3.85271335239852	1.17807415773554e-16	1.52378666453871e-15	-2.90721497753316	3.46853440937400e-10	2.25333622058351e-09	-2.19101824643261	1.69394405833062e-09	6.41297325829693e-09	-3.02579134490431	5.97999659030706e-11	3.18264248061309e-10	-2.55658083726569	3.34742000842622e-08	1.43971501793902e-07	-2.99084324260619	1.21757598001217e-10	6.63936454527436e-10	-2.96591935744469	1.74683416025947e-10	8.84028339706201e-10	-2.88696136514111	4.82265934419581e-10	2.44376699680087e-09	-3.25873301187244	2.38476327445197e-12	1.32034055024683e-11	-0.172156809458743	0.658787993856069	0.831650258900632	0.859912560468624	0.0999046473659648	0.178299061614513	-3.40276105957241	1.56247836827912e-10	8.05714173915532e-10	-2.10662736052858	6.23594921180745e-05	0.000186054481467518	1.42764496294534	0.00962165246329983	0.0242852256162914	2.29009381378657
AL034417.2	-0.379826510172144	0.624611048433561	0.844464698327259	-0.736242842030067	0.363853872024743	0.546402066045352	-0.510674955665075	0.519103352673702	0.730375154744815	-0.675162876481775	0.405333784023054	0.606752626784688	-0.536565875183573	0.383297669812881	0.556001726535379	-0.711086650384276	0.380402590764771	0.542248844056705	-0.495151539338939	0.525163112485894	0.704074588849537	-1.02187184866828	0.235841071004213	0.378060051951444	-0.531460379838283	0.521826204035975	0.703688498102925	-0.303627476943299	0.70728852696063	0.87748360204962	-0.153698021700239	0.846147466531744	0.992114877800564	-0.761121644391801	0.26925838336029	0.399030287744411	-0.905350185228241	0.338903870979728	0.504151137729787	0.360785621998113	0.655448918503782	0.833722236348877	0.409306955557812	0.620644415614021	0.801727170046789	2.19260134238221	0.032339656775048	0.0719323994482714	3.10272648322102
AL034417.1	0.0810675742118568	0.855718789147647	0.999999999999893	-0.260659846072975	0.576006879153071	0.780802249665031	0.612836122723669	0.141693980059435	0.257203187029456	-0.307886593809124	0.498145784335881	0.710003418653453	0.230536368680658	0.522336842199878	0.713300402530841	0.555055274413243	0.17332482177012	0.278657325295334	0.505073412453043	0.236386657327762	0.366403863589972	-0.44394696116599	0.414552615221175	0.599675257986464	0.766979086176098	0.100025776269232	0.174647652606998	0.707431683879229	0.119517126346062	0.205027255128157	0.666422361369933	0.134170863589063	0.225488906104081	-2.25967581339011	9.78027858830405e-06	2.66250263052702e-05	-2.26944252237643	0.00248989623494093	0.00637400347325204	-2.37637111587725	0.000760767291938297	0.00190986632464444	-2.35406386515532	0.000794544755842818	0.00204046375182546	-1.0529998960399	0.184182193827534	0.323990280908718	-1.18521856476307
AL358876.1	-0.0239688666500892	0.971290842929203	0.999999999999893	-0.0890926583244761	0.895678946581232	0.999999999999901	0.0776043758559186	0.906802952466408	0.999999999999893	1.60407100587988	0.00687998136897993	0.017148244051339	0.43837157123414	0.40449787559069	0.581034417963637	0.880492136738579	0.151428033544451	0.247592640413917	0.601070339680049	0.347089386176371	0.505818820462288	1.07788076365333	0.103458701305436	0.185252924606621	0.346170874805762	0.612364286655829	0.791047988863221	0.0573540680569468	0.935942326739302	0.999999999999893	2.00564300879128	0.000950255839442074	0.00237051857672794	-1.31431611239086	0.041789465707675	0.07449471261944	-1.15764259499242	0.190388802787902	0.311287167678076	-0.984860590318503	0.230071290792573	0.35172950080042	-1.11139095721601	0.189852034266314	0.304180318391477	0.0859284670862204	0.925232456616964	0.999999999999823	0.595994591440585
SLC45A1	-4.86986718007343	1.18364985371424e-16	1.92667360923156e-15	-4.8303312240955	1.35030025885027e-15	1.21296331330296e-14	-4.32450932080358	6.30541683113169e-15	7.10348139404167e-14	-5.16809989590455	2.1141043138041e-16	2.35093259704933e-15	-1.52225247180339	2.46627103015829e-06	7.39687090950855e-06	-1.07073336903426	0.00584407489164107	0.0130683910287238	-0.694288675330311	0.0778224372634345	0.139091252826311	-0.446935104594808	0.269908275294956	0.42407018971167	-0.737506624718867	0.0755204964653887	0.135987561145716	-0.312208353894566	0.431193452576032	0.605838343823142	-3.85188560958792	3.55691185280844e-12	1.94306603112256e-11	0.779207076519686	0.0152044300567869	0.0290461908134749	-0.591493989029698	0.183840544998502	0.302160973648152	-3.34246469591486	2.97667360868329e-09	1.35998843725469e-08	-3.39815540327424	3.31220443514721e-09	1.5545715785845e-08	0.00900320027232739	0.984134562110077	0.999999999999823	-0.943573522294151
RERE	-0.785669566319049	8.5872671022531e-05	0.000367657696101812	-0.823026647809422	3.87150088632005e-05	0.000129549053938821	-0.486483244826196	0.0148853790517645	0.0359305690740989	-1.12471829191156	1.89625725006843e-08	1.03506716268969e-07	-0.66226587014267	2.54718330455809e-05	6.98148763241672e-05	-0.513480447253239	0.0100950869483519	0.0215989049030309	-0.723226900112777	0.000296715949934779	0.000817185188237021	-0.893554720531409	7.93949295676987e-06	2.73253000923393e-05	-1.27685930596172	1.83782460053155e-10	9.27690966609412e-10	-1.24534827465373	4.87465093428241e-10	2.46746556132338e-09	-1.13033703076487	1.61621797053961e-08	6.63565709462845e-08	-2.33775817372595	4.07296949355565e-43	5.92076960306026e-42	-2.65950455250398	2.58527681147992e-31	8.6140743022508e-30	-2.38858535073519	2.10304265539817e-25	3.06852233937682e-24	-2.65264101142256	9.86264120197046e-31	2.09138881802472e-29	0.313643526439468	0.188842679607269	0.330788061579284	0.633342237396154
RERE-AS1	0.543013819279174	0.483508133366377	0.709719203748409	1.83426719885537	0.0106605960410006	0.0244841426403627	1.06609423330589	0.153519868918892	0.27524264804804	0.244325518359183	0.754433405274246	0.948418802810133	2.36921352017566	8.45166866846139e-05	0.000220167614145108	1.7476306693766	0.0140171352527535	0.0291584623540657	2.55704843226058	0.000272144950921746	0.000753849150256978	1.78549664073329	0.019662367506061	0.0414308360574417	0.319758920809344	0.701064792063524	0.865466171406667	1.62010738020772	0.032384355085438	0.0636172245350925	2.12806063347253	0.00345375045316756	0.00791342699275647	1.84073392768928	0.0039021990222788	0.00810194611906416	1.30014942742649	0.111024248205828	0.195532707675779	3.25418662605679	2.29155528521968e-05	7.03775620274779e-05	1.14291624834429	0.172824531199456	0.280634215037133	2.43446645869997	0.0163457412017026	0.0392239663268897	1.9070676222621
AL096855.2	0.178589560211852	0.831792065053064	0.99634765589888	0.167296630272163	0.842299239002734	0.999999999999901	0.509925465618201	0.523958771325598	0.735366802778242	8.64420150257121e-08	0.999999920674478	0.999999999999901	0.869368862146484	0.185634253403251	0.297383599309143	3.31632187947984	6.186381794747e-07	2.3124476204103e-06	3.19358684961119	2.31486295673049e-06	8.24632637203949e-06	8.64420139045128e-08	0.999999920674479	0.999999999999901	8.64420124629709e-08	0.99999992067448	0.999999999999893	8.64420145451981e-08	0.999999920674478	0.999999999999893	8.64420137443415e-08	0.999999920674479	0.999999999999901	1.19801034309619	0.0817429379383941	0.137590243438729	1.88392950022575	0.0149985114732618	0.0327674321488576	0.0343855409392615	0.969304989340566	0.999999999999913	2.59325974121239e-07	0.999999790124413	0.999999999999922	-0.306247384110316	0.749823663294378	0.95007222613702	-0.573783186701873
RPL7P11	0.625118458071778	0.236808369574707	0.414300627911128	0.119116138010702	0.82480356060676	0.995611486899134	0.679118572655419	0.194627243135474	0.335618847296403	-0.195762481104363	0.716387693172518	0.916624457822057	0.353857927640495	0.408640166764785	0.585811833589811	1.30092451972844	0.0108545806424208	0.0230829836644753	0.924410883251892	0.07835398568165	0.139906882336512	0.943371395171861	0.0827589521256934	0.151939380263252	0.647267991707471	0.241657367405482	0.374783934077509	1.15405030465361	0.0300057822920489	0.059431554284436	0.72152816663893	0.179324854509192	0.290680289095005	-2.81496961708525	6.68045651981595e-07	2.00058184072019e-06	-0.612152472995367	0.336333380901595	0.500924581948014	-3.33434495755467	0.000255919045060058	0.000687857153033581	-2.25709656098102	0.00221211163976461	0.00532269769257613	-0.26443699192014	0.735071514390846	0.939700043012888	-1.13433511556626
RPL7P7	0.387276710005992	0.480507820379088	0.706874968804719	-0.982033080655983	0.0964903133959866	0.176733280193262	-0.112013599256086	0.840564529480345	0.999999999999893	-0.596648315662817	0.291781573002518	0.466312533759191	-0.199420052089978	0.657074738960447	0.848812257694854	0.85999087155401	0.106125407733774	0.18123934151124	0.994136100233393	0.0658492807385739	0.119812204061048	-0.183344672497249	0.759690152695391	0.934227413454881	-0.970312173826811	0.12599534332714	0.214118651343506	0.462932189769092	0.414062893686252	0.587307116747965	0.0194512989329077	0.972951008782091	0.999999999999901	-2.02095564285275	0.000221296457353618	0.000530420273503612	-0.71014857012172	0.280785533164171	0.431832137275898	-1.57296818086391	0.0238039730977541	0.0466485444641615	-2.25091617037641	0.00320115581114364	0.00751055463587744	0.638196862100077	0.420800542264307	0.629488400257753	-0.484605714678281
AL357552.1	-0.475724231119426	0.437500370953294	0.661170458544351	-0.7968487703404	0.20517960962155	0.33956526929499	-1.53538815492347	0.0204345816184798	0.0475782892306846	-1.83123261011414	0.00616061935478719	0.0155050801274256	-0.163906161410937	0.732570619332775	0.914854056746836	-0.70220505980257	0.251399550817645	0.383481031524405	-0.832324577369005	0.191929491539999	0.30666243746538	-0.434896101655097	0.511797090766539	0.710161669019693	-0.104018971781444	0.87192341980665	0.999999999999893	-0.035335842319801	0.955197395877876	0.999999999999893	-0.143983244583631	0.817173486860349	0.969421548947804	-1.00662707409174	0.0642723600570069	0.110609872827727	-0.299092164030445	0.66465325952532	0.849043533733179	-2.17692426616181	0.00675079251718405	0.0146382600777749	-2.70171120439398	0.00101384682773629	0.00256397881816118	-0.363430701781084	0.660479399027494	0.866345413457508	-2.29403256287297
AL357552.2	-0.12698959137422	0.869342219214517	0.999999999999893	0.117938337911432	0.878077503653606	0.999999999999901	-0.197752224869537	0.803263340009616	0.974816318775929	-0.02378186724339	0.974714472317494	0.999999999999901	-0.33723900077486	0.587857659515437	0.782527763180211	0.0689834068682285	0.926784762630623	0.999999999999901	-0.146569458238237	0.849058989207121	0.992377569887068	0.139146418546478	0.860360351027424	0.999999999999901	-0.337239000772304	0.682257418812991	0.848912618924318	-0.337239000772305	0.68225741881299	0.858217769825021	-0.0551369245302958	0.944542520459439	0.999999999999901	-0.337239000774221	0.619052825164437	0.79554806859371	2.49723912569661	0.000242293885287997	0.00074168728403118	-0.286549753256435	0.738018289359753	0.899362146745744	-0.337239000770387	0.721802808726567	0.900904660531836	-1.60715857691537	0.0568856202493933	0.118239287323796	-1.94894981745754
RPL23AP19	-0.0835093995921875	0.914763967939725	0.999999999999893	1.00763118366437	0.137040414693859	0.240061417396467	0.676819875841559	0.330416986264633	0.516869463197751	-0.166823699807156	0.830822606429159	0.999999999999901	0.400781734150544	0.493159481841134	0.681729369707292	0.476865484766152	0.499204761041645	0.675261651124619	0.334506654486377	0.643439403278897	0.819964757927134	1.45120581778076	0.0398947678771943	0.0791400289736937	0.173755111115714	0.823328444101021	0.967235338207862	0.144516801693616	0.852726747874305	0.993592831508105	0.690826253914764	0.334742614564135	0.496063491646066	0.210761569236705	0.744739551757276	0.908869381645759	-0.294174978642501	0.752580358263398	0.932025548957282	-0.2941749786425	0.752580358263399	0.911194292406967	-0.2941749786425	0.752580358263399	0.92991478218845	-1.17272374917416e-12	0.999999999999093	0.999999999999823	-1.17277946062066e-12
ENO1	-0.0500709333382134	0.832337562128793	0.99660088944087	-1.00131907760634	2.30357088117296e-05	7.93835108890643e-05	-0.445880378455434	0.0594009486777091	0.122086873458162	-1.14668165770109	1.24770144309414e-06	5.49982339227201e-06	-2.08176162170726	4.86679319457795e-29	4.85610233488007e-28	-1.59865604080063	1.38769383859511e-11	7.79820098215163e-11	-1.46072113130655	6.61225448956142e-10	3.31421185808263e-09	-1.70086479626106	6.49687684137002e-13	4.22637739977935e-12	-1.92306457732797	4.35747895253967e-16	3.34038028693795e-15	-1.69891322680787	6.87250802515176e-13	4.37338894765046e-12	-2.46036348150632	2.51833089097188e-25	3.10288385606171e-24	-1.01143548130736	4.2011053991548e-07	1.27781625155002e-06	0.191077072860656	0.476117275682556	0.662966995057153	-0.970659884522318	0.000295523844371902	0.000786549713872851	-0.592552279072572	0.0271328294742827	0.0538156621980535	-0.8573683709391	0.00245124357775842	0.00697610512607391	-1.11213620938034
MIR6728	0.288424616522409	0.153871544511361	0.292162961173854	-0.229243777684171	0.258005623389113	0.411979468548278	0.186931404847092	0.354761386248119	0.546642210405871	-0.252500337411249	0.21251422046368	0.358099083376514	-1.09720561941003	7.26381471002452e-12	3.20876811302662e-11	-0.553811848088417	0.0061177971272861	0.0136275649492637	-0.465211179964969	0.021735886891527	0.0440334222549558	-0.777795082220057	0.000131649155072538	0.000391002921245403	-0.909285729305634	8.18468094277821e-06	2.6972218061533e-05	-0.82009022797701	5.43539489221148e-05	0.000167308581078714	-1.31284703190658	1.32642702696426e-10	6.42467753833405e-10	0.185139402445561	0.279269955908626	0.412166516696243	0.943851855045749	3.64721162742137e-05	0.000126970497719537	-0.0719400278786251	0.754635504120564	0.912740691293462	0.643542441058058	0.00498407015332332	0.011341628790189	-1.36884292964846	2.47087182460236e-08	1.43245670567921e-07	-1.36326268696504
ENO1-AS1	0.834044780117845	0.0347819361735529	0.0831123386486651	0.895188902267649	0.0225469074122741	0.0482807238713562	0.302227023940879	0.459267333949376	0.666617842114266	0.894043105335869	0.0199104561252779	0.0449702803449628	0.989196616023391	0.00235220606892644	0.00522500222884011	1.59122738999556	1.34985061730719e-05	4.36356080666938e-05	1.1885897120399	0.00207061226823232	0.00504110560426805	1.24217930262093	0.00281509484508094	0.00693565157080067	1.23332969882366	0.00302890201594461	0.00713383748141082	0.903137796599806	0.0316271606205448	0.0622799810835699	-0.0581550598164832	0.898787707931136	0.999999999999901	1.72612623975865	2.11995363193023e-07	6.58734717729545e-07	1.18424253655117	0.00619318159758027	0.0146508419445584	1.63184132627054	0.000254439539501013	0.000684235701806239	1.73530034398797	0.000132148999070658	0.000378446610932191	-0.123491822693216	0.782661359455328	0.970738470174382	0.0992740834891799
HMGN2P17	-0.26436464090819	0.461816706356807	0.687168013550572	-0.404122803031814	0.265521636343283	0.421905794922762	-0.280577763436991	0.429320352445144	0.633284424790356	-1.08250434005272	0.00404151780141649	0.0105402383334009	0.38077819142778	0.171937112689548	0.277669071249665	-0.352951195563212	0.309536695883159	0.457966618441843	-0.570365432593321	0.117414871316919	0.200158921983836	1.16202282019333	0.000771814331903162	0.00206738881871375	0.574874749265104	0.114528627448265	0.196884372034854	0.812097520487412	0.0198433391627812	0.0407521330390982	-0.528603748274016	0.174289495985026	0.283434989038387	0.358703451430935	0.231664844059488	0.349786771971404	-4.00684157341801	4.61640534570918e-08	2.35569234396763e-07	-4.09195414964555	2.08743057409492e-09	9.67711883781173e-09	-4.12630921414018	2.49654435228676e-07	9.80943593553877e-07	2.33853678444749	9.41155195144738e-05	0.000341116140259776	1.54599564857593
AL139415.1	1.56149155933185	6.25063259055574e-08	4.23677904548832e-07	2.65423899608543	5.00660396372784e-22	7.08141677009962e-21	1.82724754086136	7.17069925211059e-11	5.50320585819575e-10	2.30885250239148	5.19692418695056e-17	6.06053070625264e-16	2.46377819772478	4.1078038622507e-26	3.61567070264701e-25	2.44225668020523	2.30047947094887e-19	2.20708237699742e-18	2.40445295934242	4.16517446273983e-18	3.83848322130146e-17	2.8637095954673	9.62165143612069e-25	1.39183057691228e-23	2.66588584234868	3.1653290589549e-21	3.38205493684353e-20	2.81921589618244	2.54570121586118e-24	3.44460866037338e-23	3.0247270654924	3.18502433678277e-28	4.53812024280392e-27	0.323305918975509	0.246151915325294	0.368823700587699	0.990360136145581	0.00309323150263915	0.00776928202155636	-2.22134628413439	1.18164115489916e-05	3.75346116575531e-05	0.521871494699687	0.182235926340441	0.293786711923261	1.24551204018105	0.013132734906103	0.032215984563751	0.8096143860101
AL139415.2	0.347179546280649	0.617458370557452	0.838345579317133	-0.307447220927054	0.700620592159942	0.895524373221109	-0.307447220927054	0.700620592159942	0.897643410774883	-0.307447220927055	0.70062059215994	0.904052494252902	0.212629921030656	0.716697908805768	0.901672769296193	0.0048096464955781	0.99484003871161	0.999999999999901	0.444127189319381	0.539766152436693	0.719167853572968	-0.307447220927055	0.70062059215994	0.882558264226265	-0.307447220927055	0.70062059215994	0.865138015376405	0.12569728890384	0.869773999173668	0.999999999999893	-0.307447220927056	0.70062059215994	0.883985495306418	0.346590716405566	0.584099754015032	0.760177724318266	-0.307447063846269	0.73760326569225	0.918485813194574	-0.307447063846267	0.737603265692252	0.899072803411762	-0.283388353005385	0.741958675654075	0.919929273348377	0.338296044368873	0.730275826966929	0.937239559811901	-1.57080787917439e-07
CA6	2.31995794664469	0.0077220597658607	0.022008382838178	0.372989292737843	0.701543274217394	0.896419494511398	0.512138422229027	0.592734150384352	0.802838223991559	0.119718789745647	0.90400254056479	0.999999999999901	-2.22732668905855e-12	0.999999999997777	0.999999999999831	0.144811508729342	0.883977281264948	0.999999999999901	1.33595667802717e-12	0.999999999998951	0.999999999999901	1.33588877947262e-12	0.999999999998951	0.999999999999901	1.33492270339721e-12	0.999999999998952	0.999999999999893	1.33463718070639e-12	0.999999999998952	0.999999999999893	1.33500869625727e-12	0.999999999998952	0.999999999999901	-1.33943226453991e-12	0.999999999998756	0.999999999999938	4.00779571630721e-12	0.999999999997225	0.999999999999876	2.56389251999513	0.00746828545112507	0.0160782532538814	2.1575712746217	0.0293436645023879	0.0578395561237545	-2.6708848902465e-12	0.999999999998245	0.999999999999823	-2.67155242922212e-12
RN7SL451P	0.179190022506301	0.824841027553668	0.993404747442218	5.95060422040157e-13	0.999999999999434	0.999999999999901	5.95624238009256e-13	0.999999999999434	0.999999999999893	5.95871913821164e-13	0.999999999999434	0.999999999999901	0.0909157398383997	0.889741645906364	0.999999999999831	5.95278630297319e-13	0.999999999999434	0.999999999999901	5.94629838180673e-13	0.999999999999435	0.999999999999901	5.95399165720619e-13	0.999999999999434	0.999999999999901	5.94824783029039e-13	0.999999999999435	0.999999999999893	5.94653404648007e-13	0.999999999999435	0.999999999999893	5.94360131968295e-13	0.999999999999435	0.999999999999901	-5.94588174963807e-13	0.999999999999331	0.999999999999938	0.483752625254829	0.572321162017143	0.764130903738703	4.17024095409818	4.1529611874307e-10	2.05949807669722e-09	5.23100123405568	1.45345428604241e-15	1.14749540012401e-14	-1.18813123667438e-12	0.999999999999055	0.999999999999823	-1.18789542169379e-12
SLC2A7	-0.331508173284299	0.682724804123733	0.893546524618258	-0.3315081732843	0.682724804123732	0.87922539799992	-0.171754329527602	0.825792577676867	0.990155857116148	1.81185850470161	0.00368295466997932	0.00967868562236701	-0.331508173285074	0.587970162405172	0.782616627976516	-0.331508173284299	0.682724804123733	0.855315880418923	-0.3315081732843	0.682724804123733	0.856158468780407	-0.3315081732843	0.682724804123733	0.867037457987279	-0.3315081732843	0.682724804123733	0.849262157437252	-0.3315081732843	0.682724804123733	0.858440192890816	-0.3315081732843	0.682724804123733	0.867407369519636	-0.0858882235892063	0.895897172690806	0.999999999999938	-0.0879237018400797	0.916117333263318	0.999999999999876	-0.0416403535834368	0.958709258577825	0.999999999999913	0.745507817324742	0.328581702698406	0.484852999482278	-5.81139809074739e-13	0.99999999999955	0.999999999999823	-5.8097433789117e-13
SLC2A5	1.66237679386005	0.0244345154402162	0.061015034989008	3.46713412559682	2.46594877030457e-06	9.55276206181972e-06	2.46398388125359	0.00082218643342253	0.00256607998385068	2.75623263994638	0.000181879132435441	0.000603059789793651	3.93987639108823	1.25215406220942e-11	5.45830249815552e-11	3.09624258626471	2.56191747386855e-05	8.00928287749262e-05	3.4357540431486	3.03478738392647e-06	1.06679580061533e-05	2.8308828521839	0.000122550726147936	0.000365146059498252	4.11158804156343	2.29007770877761e-08	9.66723867109276e-08	4.1894786620487	1.22593604530475e-08	5.5031398814084e-08	5.18866326712179	1.69463656269137e-12	9.47793437935825e-12	4.56892401181754	2.34359921086404e-13	1.06442404836714e-12	4.03070727854796	1.29069847943537e-06	5.49825176124853e-06	6.85789032448472	1.66108944477563e-16	1.3550125192e-15	7.41913741863891	4.67469512926167e-19	4.78871885021874e-18	1.47829157986869	0.155196228962239	0.281129127870893	4.46986226068257
GPR157	-1.60793838179526	1.74418836911329e-05	8.38577363784271e-05	-0.205190153898001	0.573382616030579	0.778065839026886	-1.31314476280836	0.000370647726521158	0.00123341223372173	-1.38020763989388	0.000183643881733186	0.00060849410857452	0.14417641388713	0.615001991529692	0.809113373970361	0.415142630703903	0.249658767402511	0.381282552110932	0.386492526750743	0.286451127221589	0.431303899433184	2.80869514308848	5.49534107252612e-15	4.15288445088745e-14	1.76585202698422	9.67182788592769e-07	3.5054717551413e-06	0.74521914178852	0.0394973572982358	0.0762240743022741	1.78247419990303	7.51325182401018e-07	2.65322332079752e-06	0.33249949849332	0.279207771086413	0.412098757779404	2.3920669686034	4.13569226506336e-09	2.38696604508717e-08	4.32397518044903	1.78476909213912e-26	2.77539633328048e-25	3.83716599761334	3.58502767134969e-21	4.22204884934049e-20	1.21969155586126	0.00629231220015882	0.0165100234071489	1.15142590873572
MIR34AHG	-2.33816316044694	4.23556675092513e-11	4.11170297191637e-10	-0.402824971212098	0.246537762630927	0.39659578291582	-3.21149328966358	2.56745795331344e-19	4.02252110582643e-18	-2.0578123465089	4.52644001324932e-09	2.63899581488381e-08	-0.63377008815284	0.020629469072332	0.0401109661969929	-0.81611297077607	0.0186199155220462	0.0378080499327516	-0.804319253840796	0.0208836074307327	0.0424776193022805	-1.83548421564451	2.07931177759129e-07	8.48797878628047e-07	-1.1382178658787	0.00115636976865988	0.0029062750072991	-1.97409181880498	2.28167958281383e-08	9.99348154412394e-08	0.811764851291263	0.0190915858753089	0.0385763276335138	-2.4509062245598	2.43332245075194e-16	1.29248084783202e-15	0.0267127589407981	0.945845637249037	0.999999999999876	1.0070235951473	0.0103752732011321	0.0218018411790051	0.0891233784902473	0.821391727910724	0.978038986742548	2.09007845436946	7.643821471456e-07	3.71243260175989e-06	1.32967379622351
MIR34A	-1.66332810744867	0.00138813486577604	0.00471905913311715	0.218862988710758	0.627143361994656	0.828308692143823	-1.66305420447193	0.00153401075736176	0.00454678208856732	-1.09972302941982	0.0242996633055274	0.0537888442354951	0.628069626743011	0.079172538231243	0.138263607645835	0.505854116531805	0.243233954236537	0.373001397041719	0.403924778699765	0.368782543799563	0.531747130007629	-0.624748896606427	0.238949646579104	0.382367639019169	0.521509159468985	0.2719125876289	0.414614251648741	-0.851443917602811	0.109388351210564	0.189669916900981	2.20483096469089	2.0225244170302e-07	7.5159847603136e-07	-1.82274290990095	6.20877203448874e-05	0.000157524029886142	0.268920522993071	0.598209233787065	0.789495891970806	-1.93599522163135	0.00143416311102459	0.00345548429081454	-2.32240823194795	0.000429388302142241	0.00114660759332878	3.07446577055257	1.18540988495273e-05	4.90712529449759e-05	2.80160152631668
LNCTAM34A	-2.47176166930115	1.90169115930788e-10	1.72286508040326e-09	1.26744223529668	0.000170346901296981	0.000523885221974623	-2.13141806391539	1.10416690585655e-08	6.73608835489418e-08	-0.589459580727581	0.0883852879992064	0.168617350385929	-0.231230940811286	0.398889507562637	0.574394858183804	-0.456921120349671	0.181387244123987	0.289790299062958	-0.441234529840101	0.205591128194912	0.325331533389135	-1.01953959936958	0.00625900696711267	0.0145100615364776	-0.31580324189323	0.376419028130295	0.541473464638247	-1.21690235324264	0.00105485471016654	0.0027067288795772	1.36865655295633	5.03778864668093e-05	0.000147639010181689	-0.0374305015829522	0.898212491118431	0.999999999999938	0.743344786265866	0.0529788292527474	0.101650469250441	2.01557815146487	1.30853573404618e-07	5.13332620576616e-07	1.03763211997083	0.00788279345442198	0.0173081196340881	1.96367882271399	2.03354184979627e-05	8.12608208771057e-05	0.839059487025837
H6PD	-0.583467738768214	0.0637947632847638	0.140337783881264	0.172425654006812	0.583178344121585	0.787507287147379	-0.726063727723517	0.0209573463849212	0.0486467897387972	0.0569677474717818	0.856123259781451	0.999999999999901	1.91950100774496	7.86022966390118e-15	4.08232278285336e-14	2.65299891513257	2.61658374763045e-17	2.20508720599526e-16	2.06241954713338	4.8298140468965e-11	2.65733160703508e-10	1.70275154210346	5.7057811602698e-08	2.44859609710549e-07	2.14094989447777	8.73753679402811e-12	4.91936859999411e-11	1.96016175108296	4.10989647275004e-10	2.09449972686691e-09	2.88327407643713	3.71813205770627e-20	3.4038077597923e-19	0.90543452308133	0.000647404878723393	0.00147469944624561	2.49861130863069	2.06443416734649e-12	1.67744798394722e-11	3.7543295103158	4.29199377212284e-26	6.48722456222525e-25	4.38103935356772	6.15357945946891e-35	1.6450738520892e-33	3.66893167950161	3.46974843058787e-22	6.88079372861794e-21	3.49022596383021
SPSB1	0.513476023978876	0.309318618069379	0.510562707447874	2.4844617498731	7.77862531242513e-07	3.18095732722919e-06	0.880617249851526	0.0804625868315908	0.158552111386779	0.874441849247973	0.0827271161478587	0.159081689476188	3.65892593798234	2.73021216299391e-20	1.87587474884806e-19	3.84873877746485	1.80307249763935e-14	1.25010786768394e-13	3.85294239613886	1.71584289551813e-14	1.23420770832563e-13	3.4019040422334	1.28598415569862e-11	7.62246189971932e-11	3.40401469187915	1.25296394608e-11	6.95327278207016e-11	4.25891828316191	2.25896962724339e-17	1.98413812350495e-16	3.65685550114975	3.36372635617941e-13	1.97443920674028e-12	3.53662039417122	9.37248986428029e-17	5.08181370527765e-16	3.39393579972178	2.46509834755526e-09	1.45798634719472e-08	4.61319277211708	5.09476810698588e-16	4.01678405730892e-15	5.26085355466233	2.2538748517223e-20	2.51698083775579e-19	1.59120053061349	0.00827170959671545	0.0211824106158543	0.767155157026631
BX323043.1	1.62014139108727	0.0118913648665149	0.0323660272082721	3.30455917668088	3.62308559459956e-08	1.71084174879848e-07	2.55116581410891	3.03034364923296e-05	0.000120259046424277	1.66378194798095	0.00865940737580385	0.0211588378537031	3.24643434249419	4.15846287735418e-10	1.64343594764274e-09	3.18259408786802	8.40591812139775e-08	3.41668328112237e-07	2.99905568114649	8.32505159785382e-07	3.11379974439792e-06	2.93090284336583	4.09961882257163e-06	1.45591998608221e-05	3.34915244189198	7.13608668694516e-08	2.87789060728446e-07	3.58983611840075	3.65282733407159e-09	1.71946791011001e-08	4.07615328217919	8.22007518659886e-12	4.37147863897698e-11	0.097203530126528	0.876568101705767	0.999999999999938	1.74616020865932	0.0131768118391361	0.0291535019179977	0.0605359379168679	0.939801651795234	0.999999999999913	0.38427137167124	0.625623150413972	0.806789779551406	-3.31665742620965e-07	0.999999753618161	0.999999999999823	-3.31665741499765e-07
LINC02606	3.48862491639272	6.71122744380745e-15	9.329554171958e-14	4.56721172954299	1.5660570631863e-25	2.71717641024071e-24	3.97720445944279	1.52014695407938e-19	2.42591829965702e-18	3.66444341121124	1.04618343282338e-16	1.18963401965128e-15	4.52348481084099	2.20697936403034e-31	2.40629278336283e-30	3.86046545072345	1.07329426078935e-18	9.89677149774364e-18	3.82699571898963	6.54209635162292e-18	5.95971425267524e-17	3.24998884706466	4.18494130355751e-12	2.56121161028577e-11	4.35378473609871	1.81048857843029e-22	2.09151501539036e-21	4.22907515753474	2.02095550007141e-21	2.3003343363102e-20	5.51725946252314	5.15342609644063e-37	1.13209210064997e-35	5.17475867713112	1.63147982055284e-38	2.0286748586231e-37	3.58710506293589	1.27555138220286e-13	1.17053044578812e-12	4.24977019917459	3.75207031017979e-18	3.42186433378021e-17	4.37750037609625	4.80796033687264e-19	4.92134038593153e-18	1.08980383280179	0.163912317829858	0.294142998796832	1.16454859945932
SLC25A33	0.179082565434356	0.541183287635817	0.767708212884834	-1.09407094244821	0.000218031265833772	0.000661450387091694	-0.641092555218838	0.0290500040708774	0.0649871658260409	-1.18352804653012	6.1542714878123e-05	0.00021804773652673	-0.321024265640214	0.16525902140109	0.268091068433465	-0.0855684512072063	0.769419539884735	0.928871050633961	0.127645473686588	0.66290665116677	0.838522656683494	0.0490632269663955	0.867243178689756	0.999999999999901	-0.10645840625914	0.717354241727862	0.879644419201989	0.0180816375373887	0.950811868189148	0.999999999999893	-0.598972090153787	0.0423176179599994	0.0799777352443466	0.629978239424387	0.0108956629002857	0.0212959919438048	0.582896938157286	0.0782879949192819	0.143971452094479	-0.42400992345565	0.208361684656692	0.322508845863962	-0.387047483437837	0.251088102707269	0.38435896956635	-0.709040112015857	0.0517496317088012	0.108939674362879	-0.437289650885865
AL954705.1	0.819637850404763	0.0240660632029929	0.0601868184836815	-0.0448921065483156	0.9035171431451	0.999999999999901	0.169944878926738	0.641990603831603	0.846897624921622	-0.361469351688454	0.328955383552828	0.513739225434266	0.472986372800275	0.104425816708088	0.177360180132213	1.08212028532083	0.00237661764299098	0.00567752112422355	1.12986881551668	0.00171964386480212	0.00423847613737252	0.941533514973517	0.0104541559371185	0.0232259626668916	0.36378986077344	0.335586401361611	0.49351187201888	0.697108578736911	0.058382898817983	0.108178083590591	0.949863279975917	0.00905129645955471	0.019381955008324	-1.77925427657018	5.2460797897612e-07	1.58357943159045e-06	-3.25249846254191	3.60418841411161e-09	2.09380278069622e-08	-3.8757726906732	2.34857153504498e-11	1.29890077752039e-10	-4.01957120790565	8.47806398524653e-11	4.57741202531562e-10	0.433518949482182	0.401242575355518	0.606647746121327	0.0143217003949728
TMEM201	-0.404926608774864	0.0357746760481673	0.0852230759235099	-1.16970838803643	1.78702265319641e-09	9.62774973358919e-09	-0.311550526251079	0.104515247963364	0.198615551677412	-0.982122208064376	3.83024919658443e-07	1.80041438525293e-06	-0.891046989392187	4.81978603078306e-09	1.77040155924104e-08	-0.413080376196725	0.0308262154476283	0.0598449460146938	-0.333531607470444	0.082893757841572	0.146998304423725	-0.629826210083786	0.00113109371409531	0.00296073572683618	-0.738863814619258	0.000140044312508165	0.000398390436010129	-0.471719663478749	0.014347925239091	0.0302771027258853	-0.561978861479059	0.00362047053927682	0.00826333025367734	-0.481577284723606	0.00315106707989681	0.00661398911386521	-1.07536635450678	1.03042673901717e-06	4.4535750660747e-06	-1.59562036710666	2.9170162347436e-12	1.72808433455815e-11	-1.55176774950791	1.17047514559186e-11	6.82015466008587e-11	-3.0577267596215	1.91194210538408e-39	1.19939454491405e-37	-2.58292712619685
PIK3CD	0.265214104372262	0.40703432225924	0.627827057605317	1.3749431117303	1.68177554711953e-05	5.89853020162506e-05	1.87128470810632	4.657206768321e-09	2.95808089438186e-08	0.555246763567009	0.082393099671928	0.158548866673171	2.25516479550556	3.05493095432748e-19	1.98807421766178e-18	2.58335369645682	5.90298255236759e-16	4.52384307676929e-15	2.56830392653908	8.78147340524183e-16	6.91046385280239e-15	2.23549046650288	2.56835953817635e-12	1.59301520631113e-11	2.23242277488077	2.75339495328521e-12	1.60868419800041e-11	2.324143780088	3.39182339986126e-13	2.20748914217755e-12	1.85789204922862	5.99628794363468e-09	2.54638255374805e-08	0.678004527059213	0.0121250591994962	0.0235218810364149	0.838136459517538	0.0206987379881645	0.0437981317797609	1.21641242938997	0.000786513588978915	0.00196972641960126	0.90430160042116	0.0125882037432403	0.0266291496562855	1.43226438178678	0.000183376894879373	0.000634158391974681	1.01741348666218
PIK3CD-AS1	1.46541947815763	0.0740478481563448	0.159396564134217	4.45261583641978	4.28682372510739e-09	2.22496270444871e-08	4.40837586830743	5.75330345613044e-09	3.61538905623565e-08	2.93800248777022	0.00015150315671282	0.000508970220131206	5.33573165140765	1.59826726355998e-15	8.6050250637362e-15	5.38127865013458	6.59313645686561e-13	4.09304145056417e-12	5.45283254969415	4.20842509855425e-13	2.71323666923051e-12	4.47119122267671	6.84584547600428e-09	3.20265070803438e-08	4.97822843751645	7.01518274654054e-11	3.66688267564828e-10	4.81063333139028	2.7177012955585e-10	1.40485944515536e-09	5.28732771987828	2.55687953052706e-12	1.41288477873184e-11	4.4438425812979	1.85968194837145e-10	7.12716246365647e-10	3.32751345393124	7.31910274156493e-05	0.000242958178189204	3.94435435642805	2.72578887224061e-06	9.29961293788613e-06	4.44110022577354	1.24046061969104e-07	5.02187258771488e-07	2.88617091718555	0.00233466350526522	0.00667610024809089	2.81529140748526
AL691449.1	0.136058842316999	0.885780591595195	0.999999999999893	-0.0715544591253134	0.94243166696731	0.999999999999901	-0.0715544591253129	0.942431666967311	0.999999999999893	0.0440600716103046	0.96365042153611	0.999999999999901	2.89757557537262	4.34667104582084e-05	0.000116435659876446	1.22519165765528	0.162056107151811	0.262978968474439	1.34413179322386	0.128382657040389	0.216566266878739	-0.0715544591253146	0.942431666967309	0.999999999999901	0.407347856679509	0.672138830376534	0.840924888403296	-0.0715544591253145	0.94243166696731	0.999999999999893	-0.071554459125315	0.942431666967309	0.999999999999901	-0.0715545186125334	0.931531913545482	0.999999999999938	0.461665165003567	0.651629622380661	0.837263968721388	0.701857976727148	0.477438914130269	0.645481157391461	0.538703091943956	0.597693603167741	0.778360753303439	-5.94871830575887e-08	0.999999960461725	0.999999999999823	-5.94871836181884e-08
PIK3CD-AS2	-2.24358045022221	1.04348563203455e-05	5.19236603817719e-05	-3.59294456984711	9.65659575124652e-12	6.37008736226712e-11	-3.11321789194039	1.59353909919872e-09	1.06575118828897e-08	-3.87317183412598	2.00096947434684e-13	1.75699575934979e-12	-5.82324534053056	4.0961458665598e-37	5.61940365750186e-36	-5.07204175009893	1.75092525246158e-19	1.69802540572021e-18	-4.7762693319083	2.86900965521079e-17	2.50013698525512e-16	-4.56805879395157	4.27158317555457e-14	3.03687967300266e-13	-3.65987583508159	6.69796394910451e-11	3.50611395239195e-10	-4.77016813575911	1.0123868012201e-15	7.93069905957447e-15	-3.85268486214237	2.55366193933145e-12	1.41126801086805e-11	-2.91561777231848	2.30984267204795e-11	9.37674671116869e-11	-3.51218462874016	5.47702294474305e-09	3.11988869710332e-08	-2.23614109813839	0.000158925328540238	0.00043942921229171	-4.14463186523026	1.71660286690369e-10	9.03913425430892e-10	-1.69988360845594	0.00607194661299057	0.0159943767508158	-2.07899015949011
CLSTN1	-2.04353964081081	1.83675839100295e-42	1.52483226917059e-40	-1.75364499847289	7.63784426905559e-32	1.89469456834372e-30	-1.0496518986245	1.7514533755056e-12	1.57437494003345e-11	-1.61911724201594	1.89496861979232e-27	4.21256052597491e-26	-0.0956573809982417	0.413525329469175	0.591410860722387	0.281706157224202	0.0577060107391374	0.105419874522614	0.227760795841126	0.125211400796716	0.211933625765056	-0.243158059853144	0.101952768184528	0.182881345918722	0.0702717900110962	0.636334873798842	0.812005462182566	0.167875831632597	0.258420602991802	0.398128372314137	0.103276188989194	0.486929364542628	0.67197974868825	-0.746099143122695	3.00552229377246e-09	1.06282420116185e-08	-1.01606090220247	1.76235380610329e-09	1.06017544677405e-08	-1.12500412107228	2.88407150088878e-11	1.58255668677041e-10	-0.902042580045601	9.31864652548781e-08	3.81762241320677e-07	-3.27579781883963	3.98597795657813e-74	1.66624460827329e-71	-2.30611975913348
MZT1P1	0.876582431200342	0.0166970934644286	0.0436480688422365	-0.167922720234642	0.648984789086092	0.84856041740895	0.245515145022349	0.5030521835371	0.713551017768962	0.193292244715736	0.598336492450025	0.813311915848065	-0.328534652356671	0.259860226693398	0.398836942499084	-0.822847106457018	0.0254712794592576	0.0502517313627255	-0.514067334464999	0.165695793243182	0.269999414085846	0.248572284383257	0.500697587679513	0.697713894806557	-0.092190972157523	0.804001484787981	0.951535042139901	-0.122129800934758	0.741397993565832	0.904616299194694	-0.985152843209512	0.00878224153290069	0.0188508772484472	-1.0302916050041	0.00112131509265006	0.00248523584011005	-0.125107577403822	0.764828211091677	0.942887201664273	-0.500603415970797	0.243724497441591	0.3696015946062	-0.815083933973097	0.0617330448962043	0.113306711936347	-0.543909961863853	0.261243965169817	0.433604398549776	-0.204568130174037
AL357140.3	-0.270660099224446	0.741557473289824	0.941457836597136	0.14437716142545	0.850507669775083	0.999999999999901	-0.270660099224447	0.741557473289823	0.930457947931877	-0.270660099224445	0.741557473289825	0.93769075037116	-0.0517779274144332	0.93354559025671	0.999999999999831	-0.122440003296673	0.876894663261159	0.999999999999901	-0.134626476987186	0.864767715345963	0.999999999999901	-0.270660099224446	0.741557473289824	0.918859593110701	-0.270660099224446	0.741557473289824	0.899354293198579	0.125580422847494	0.873501192817531	0.999999999999893	0.00486190949027577	0.995086995538748	0.999999999999901	0.338468962604494	0.605708798555559	0.782250301194533	-0.112463230960573	0.898561007612449	0.999999999999876	-0.262569853812724	0.766202406433179	0.921973601774773	-0.0636064795217192	0.939960546185138	0.999999999999922	-2.45131013224523e-07	0.999999807790856	0.999999999999823	-2.45131013224523e-07
CTNNBIP1	-0.556106229599589	0.00469179688101397	0.0141523888421748	0.95446037410426	1.07252598437059e-06	4.32524380508201e-06	-0.0614745501557266	0.753719365674491	0.938708606874284	1.14813268709042	4.33541784078962e-09	2.53281602913667e-08	-1.15650719576375	8.64525681897188e-14	4.24511861910262e-13	-0.734210616756493	0.000178516596326196	0.000502417656349079	-1.0729404803687	5.11400208596822e-08	2.15976622057395e-07	0.16184056543545	0.409119063116315	0.593346498582158	-0.25429020329611	0.195524053435758	0.3127232922105	-0.0901882032549233	0.645563394650447	0.825647860321199	-0.303168947713321	0.122571308358857	0.208047366547702	-0.440493417073039	0.00801218885147449	0.0159412813424387	-1.59507154511804	1.17800072405049e-12	9.83693729105709e-12	-1.14005192628911	4.08819998171735e-07	1.52995056481369e-06	-1.42355579538747	3.10513431436057e-10	1.59913645152196e-09	-1.31154377577328	2.83379001996582e-08	1.63212406260958e-07	-1.09728874782469
AL357140.1	-0.459262679177614	0.0537126252010861	0.120958394194494	1.04950393763764	8.05485305180171e-06	2.94265845989581e-05	0.0253904480628024	0.91427153039224	0.999999999999893	1.37869159425508	4.24140987002295e-09	2.47939238238816e-08	-0.912169284905993	1.21634216811857e-06	3.73703487965986e-06	-0.586893303546025	0.01280936897417	0.0268679041448065	-0.834385573550134	0.000468604766957646	0.00125583481396356	0.0490493208052805	0.835955545553266	0.996452854618651	-0.278706078903887	0.241684182104231	0.374813214815245	0.226280505709864	0.33777211022859	0.498625441748872	-0.130033727041436	0.583428026014851	0.772596126431503	-1.0585249576573	1.72274035893051e-07	5.3921208960135e-07	-2.14540953705874	1.78726324693263e-14	1.76999871732792e-13	-1.21099575368689	1.52428407628992e-05	4.77449808386892e-05	-1.5301623518815	8.01426815269265e-08	3.30574197666786e-07	-1.34534844753139	3.15922870346064e-06	1.41559937645011e-05	-1.15037737040706
AL357140.4	0.0280797796014642	0.97429795689202	0.999999999999893	1.0368157108936	0.198839706933087	0.33072493014731	0.532183522782015	0.525911999096023	0.737225173926025	0.666555391107924	0.415399888282567	0.618452457477228	0.273054534593993	0.691778954672186	0.881068781827818	2.15489373486607	0.00417220026743128	0.0095659230039081	2.24724995939517	0.00297956908492214	0.00707598288305459	2.00254326915799	0.0133232286437314	0.0290060101347144	1.48915970690597	0.0700450925195704	0.127009329213733	1.87887708397676	0.017685542535845	0.0366601708252461	1.18545520473916	0.152674033614037	0.252523457156938	1.96736919497162	0.00411624469938543	0.0085226004270093	1.45495771106125	0.0948768272084348	0.17040078693565	1.33701527123624	0.12293166339616	0.203750290485656	1.22475979580455	0.165437984813796	0.270367833352673	-0.539532563624483	0.579604024434721	0.795801514423408	-1.10410828346841
LZIC	0.775789943914242	1.98343377999812e-11	1.99385957577722e-10	1.6353690805224	5.78578348004078e-46	2.86171476768929e-44	0.97140989226267	3.17017944894313e-17	4.27490056036902e-16	1.54274171656289	4.11877335681679e-41	2.0043186917593e-39	0.873112537336868	1.20493396695558e-21	8.79255499453764e-21	0.829304228884229	4.90422349776865e-13	3.07534357347113e-12	0.793410620596875	6.0331972290836e-12	3.56254699172926e-11	0.873266695184902	3.98227817411957e-14	2.83787186382861e-13	0.858124733825871	1.14418566703574e-13	7.38157584727768e-13	0.847516525297177	1.99987140320454e-13	1.32828916582076e-12	0.840886797356003	3.19933318740656e-13	1.88182568427064e-12	0.466535452926109	2.07883412540121e-06	5.98310127380064e-06	0.243096106807411	0.0641441920089784	0.120641961842198	0.31759033252616	0.0163615023576066	0.0331033709691311	0.211661165575648	0.110415795506199	0.189414335741652	2.73245363827119	2.64261477945863e-67	7.80182464608045e-65	2.52300674220362
AL357140.2	1.73408477071157	2.3434941119214e-05	0.000110544868548863	3.41350983140408	8.11215080696498e-19	9.2440299407613e-18	2.1723420550438	4.51741798123272e-08	2.57343551832477e-07	2.96085331035071	1.84036542029991e-14	1.76215353278241e-13	2.33057719549012	6.78748207268901e-12	3.00183139706034e-11	2.80229007175151	3.27113041360569e-13	2.07574959330117e-12	2.63871742581074	2.22591543853377e-11	1.25655511154387e-10	3.00685747987763	7.03820893539734e-14	4.9242013426667e-13	2.69829171502219	4.29698798986324e-11	2.28474585408791e-10	2.09258178955189	5.82778881589513e-07	2.23248122858193e-06	2.25117337323658	3.79747541908757e-08	1.50804760239326e-07	1.28821123880726	0.000655909744175316	0.00149319930343431	1.74938690449015	0.000123579914732048	0.000396228688371696	2.104863675672	7.67506009027512e-06	2.49068015931395e-05	1.88645644129003	0.000128743613296629	0.000369184324251819	1.05959738768885	0.0503379738816323	0.106323326428486	0.558499111643964
NMNAT1	2.46563194294278	9.81364400054726e-27	3.33741613861664e-25	2.84930498252769	2.39616799736325e-35	7.13730508229387e-34	2.59537487956666	1.1282641231059e-29	3.39680129911749e-28	2.5689196515615	5.12627503548227e-29	1.25492561888352e-27	3.15910136077089	3.43648558326226e-66	1.1653687514582e-64	3.3017335686114	2.18688547532111e-47	8.79353375708295e-46	3.00657286074773	2.70628347940903e-39	7.91003327791256e-38	3.2987529714316	5.67797070621427e-47	2.41141770826781e-45	3.36589260374159	8.13853729063819e-49	3.40815679076131e-47	3.05602835078632	1.4980011064031e-40	4.59786083581306e-39	3.0970045734695	1.48705961808662e-41	4.02087953637251e-40	2.11756792134795	7.37021074208327e-27	6.18101826864629e-26	2.64516973201894	1.5324191948126e-24	3.33380165551886e-23	3.80778321938146	2.45164772228935e-49	1.22542156373851e-47	3.79937505926951	3.99039210718615e-49	2.1659798164195e-47	2.50223160333919	1.30459631487115e-16	1.66105703842502e-15	2.32949170286359
RN7SKP269	0.527411835126527	0.465685600666325	0.691552413426238	0.0601306183923861	0.936282227076967	0.999999999999901	1.09123296577639	0.118974075492229	0.221634199788084	0.659440632320199	0.353699732574182	0.544334346010782	1.4394087280451	0.0118647363285842	0.0239622663823999	1.95081995481067	0.00355861429612061	0.0082609103247069	1.31910849565029	0.0602606068470213	0.110638263749609	2.42652861191956	0.000461211668226103	0.00127512665169254	1.77299574975785	0.0132781846738578	0.0280623511001307	1.65952694902323	0.0202549075584391	0.0415215496392825	1.4167798091927	0.0475728091807002	0.0888235100547325	0.28863631231132	0.651831406042034	0.825307039635797	0.751017573250588	0.349296074629794	0.516630132460153	1.66391765787359	0.0296413057373309	0.0569478623899458	2.72309382846586	0.000329312309582994	0.000894642428368721	-0.555446606940958	0.493468465086866	0.715051685183849	-1.28676103313492
TMEM274P	-0.234992390111967	0.786041897997722	0.973831859413512	0.175285857121513	0.834959451341946	0.999999999999901	0.114859985837514	0.889233015905992	0.999999999999893	0.202228402800486	0.802947784245674	0.98288615675874	0.840522133872336	0.191057325151729	0.305025126582848	1.73105362987989	0.0173091859830285	0.0353722805777973	1.02633351971432	0.175651195364325	0.284163582266764	-0.282237331524031	0.751706491638526	0.927162897135639	0.183666473577232	0.831115111454004	0.973839969235322	0.174103053654874	0.839805743158684	0.982839373375681	1.2260547949452	0.113167226257714	0.193620706531475	0.278357905113521	0.695528761603496	0.864944989936911	1.63816750283474	0.0457173363935804	0.08910292669423	2.96299219458255	0.00013675912591956	0.000381541825197596	1.46136470917871	0.0835418560696694	0.148081328570401	0.926458712476329	0.385150768532455	0.587830916095884	1.27235617106135
MIR5697	2.14324613156291e-08	0.999999979896384	0.999999999999893	0.167728348315369	0.83818230725337	0.999999999999901	0.487146244686858	0.532254748830282	0.743475694783572	0.123477085774115	0.880534555621282	0.999999999999901	0.130032119945581	0.844858983645934	0.999453738256584	1.0856263395179	0.138219711482357	0.228701970362103	1.08034565164324	0.135919799396485	0.227605790016484	0.438773184783093	0.592395246550152	0.792909657842311	1.07552740601648	0.166650341789548	0.272672746626703	2.14324613957148e-08	0.999999979896384	0.999999999999893	0.638821766968753	0.423036522279108	0.60149747779922	-2.14324662408974e-08	0.999999976213078	0.999999999999938	0.118798585576023	0.896146929764354	0.999999999999876	0.0513637077196819	0.95317028198355	0.999999999999913	6.42973706927102e-08	0.999999946810835	0.999999999999922	1.0482864347204	0.265796400036675	0.439595356075837	-4.28649094171239e-08
AL603962.1	2.53575819169949	5.70854712968547e-23	1.50982441637711e-21	2.39313291117498	1.04906810070949e-20	1.36599115035317e-19	2.36400483921333	1.63678376054695e-20	2.79121857389733e-19	2.14994482632386	4.65917186122425e-17	5.45313623138158e-16	3.48972484420465	4.58668409881633e-61	1.35415215513712e-59	3.49845361273551	2.10020603282455e-45	7.69063334033476e-44	3.26481212621549	1.13787390842271e-38	3.25501919409414e-37	3.2580410831457	1.02725723984186e-37	2.85255536526237e-36	3.35516905888096	5.24657107807317e-40	1.4638646072944e-38	3.17890921191583	3.14110472383219e-36	7.79697130003474e-35	3.18383150007659	2.35592661849758e-36	5.02483414094283e-35	1.49104199752831	2.1774447137209e-10	8.30163090718977e-10	2.53584710955269	3.40483358885714e-19	4.99684734689246e-18	4.02049401768421	2.51608088936477e-47	1.14289663766645e-45	4.14205901327433	2.96382824103068e-50	1.6865485473109e-48	2.79866265605404	2.79275940264539e-10	1.98946728853507e-09	2.41801561653161
RBP7	-5.7219883324459	4.36386661217703e-15	6.18284244629293e-14	-1.41739071622734	0.019769444206754	0.0428299590027459	-1.74206316916906	0.00424129258930401	0.011604166697999	-1.13220046648035	0.0610028809284156	0.121746528556409	-0.537037715291576	0.258460086280824	0.396999681369049	-1.26227393487164	0.0363601996752253	0.069497092213025	-0.821010992271067	0.175033809688219	0.283269002209709	-2.75045683496815	2.32514098479306e-05	7.58422419807113e-05	-0.921771026491708	0.131776418280589	0.222494287104414	-0.254778302568916	0.67313961549949	0.851155517712427	-0.0191621293405676	0.97461780455677	0.999999999999901	2.9905870485783	3.30585500135856e-09	1.16528627783133e-08	-2.12879137555025	0.00239198106286468	0.0061432862261048	-0.369478035620515	0.592707596416195	0.769208226992301	-0.402445597295631	0.561383665923292	0.740189237598099	5.81659170925854	1.56980245059177e-14	1.66001249963294e-13	3.36575694485165
UBE4B	-1.16719177593108	1.26640769651196e-10	1.17227709896405e-09	-1.15281714596105	2.08894395211764e-10	1.22542427596152e-09	-0.970267652523194	8.57658889711098e-08	4.73340728744984e-07	-1.0902274395035	1.82626367598398e-09	1.10731828526414e-08	-1.10472315076985	9.58191396908215e-15	4.95571025303694e-14	-1.04990904940051	6.61406929399221e-09	2.97150899933394e-08	-1.16092522826791	1.53015825109434e-10	8.09562999892664e-10	-1.30211131380541	7.26943229646288e-13	4.70804991935733e-12	-1.22714424467274	1.37246118680578e-11	7.59500340688198e-11	-1.58689298116004	2.30815374271911e-18	2.16158323443343e-17	-0.695830641494373	0.000122700487622511	0.000343006858978487	-1.93849437024038	1.72199993601919e-36	2.02067675532039e-35	-1.96220232201097	1.82778054858224e-21	3.17890706262005e-20	-1.24225919286465	1.64730301694778e-09	7.71268464074203e-09	-0.982750045466678	1.79249125319485e-06	6.41690802379459e-06	-0.179060753744256	0.409788866592621	0.616549773577387	0.393563681516097
AL590639.1	-0.00716071584876448	0.992259110370016	0.999999999999893	-0.472500137380482	0.543888271325171	0.748024205300026	-0.105815234643461	0.887486093064493	0.999999999999893	-0.113090683327817	0.878741363409535	0.999999999999901	0.0225702934643238	0.969697448714779	0.999999999999831	1.14338384701126	0.0943734998719997	0.163489929782195	0.870207150796478	0.21552257576625	0.338808409136551	-0.0716641787298339	0.927785315529973	0.999999999999901	1.22940994774638	0.0930751484057478	0.163709814761778	0.982891960740975	0.181146546404575	0.294433260357611	0.657642738388295	0.370543694655186	0.539596307470507	-0.644434998364746	0.337448018122093	0.485895212970504	-0.235236714284679	0.78145918266753	0.954348382372735	0.27782028725223	0.731205408148159	0.894284592587059	0.896898474665013	0.270131136993973	0.409143311210006	0.840627673854173	0.407045626641652	0.61347757851036	0.769891927950899
PGAM1P11	-0.316680932925431	0.618838615736745	0.839568030661055	-0.0988176404322677	0.874601912807626	0.999999999999901	-0.952066248110334	0.16137018980251	0.287148483978798	-0.760014181358278	0.246741337329307	0.405538430859185	-0.625116364863361	0.226319251069104	0.353535019393671	0.522607850495531	0.373715134003295	0.534527562895961	0.373726538683557	0.536162449206578	0.715548920031722	-0.528482003121822	0.454152023143357	0.644943070648903	-0.695651889970613	0.320932444741942	0.475828182431736	-1.28938601976805	0.0868697141665365	0.154462272406199	-0.870400988826212	0.22044210171196	0.348012329431568	-0.63571537920392	0.256680018064254	0.382662669106388	0.189314121709232	0.784305390560324	0.956279330018733	0.504362215316824	0.461917819965884	0.627445844165925	-0.308031366476048	0.679002371261762	0.859018619289045	-0.196908380870049	0.84359455120882	0.999999999999823	0.70592819255384
RNU6-828P	-0.0880040632861172	0.911771189323971	0.999999999999893	-0.122867005563913	0.877097016666797	0.999999999999901	-0.266664000036364	0.746379483982163	0.933671142552129	0.0834206535591313	0.913831902313541	0.999999999999901	0.112455726981769	0.853853169070963	0.999999999999831	0.886415053568	0.206934479541248	0.324401188692327	0.693135737236525	0.346757318931755	0.50544481976393	0.928324042694643	0.214331588449961	0.348277131515669	1.22231049104674	0.0965361455686358	0.169173730596388	-0.266664000036364	0.746379483982162	0.908538053003798	-0.266664000036364	0.746379483982163	0.91710611384203	-0.266664121003963	0.695970677589831	0.865388302207522	0.215434385437953	0.799916163782731	0.968527911997422	0.0553212548630769	0.948211179702165	0.999999999999913	-0.266663879068824	0.777917856781982	0.952860988374618	0.626123611469439	0.527039992743605	0.750800329841963	1.26048409400276
KIF1B	-1.237621247237	3.69342381816989e-08	2.57819212204657e-07	-1.24475205697353	3.06055057191026e-08	1.45659201903793e-07	-0.978587925963819	1.31881184917105e-05	5.51909031276809e-05	-1.20089844651895	9.08119937882904e-08	4.59791561180759e-07	-1.81029199149886	1.40537115273813e-24	1.16181885361859e-23	-1.775837945795	2.63779722392174e-15	1.93271985932697e-14	-1.75300240285572	6.4328904755964e-15	4.77560176451849e-14	-2.19152820786792	2.2519609250119e-22	2.81701851113527e-21	-2.07392141082566	3.32739405113798e-20	3.33000238969502e-19	-2.86601281174061	5.63245048610273e-37	1.45946277351637e-35	-1.49297765416545	3.12078780894584e-11	1.59074677220376e-10	-0.794473402162167	2.85636637892779e-05	7.46881778239337e-05	-0.66510045510778	0.00900283536129049	0.0206231670228377	-0.0524502841912971	0.836758522577678	0.980114152653077	-0.209789228126484	0.409926515943126	0.584546587406589	0.453534796673654	0.0915817483134901	0.178998967439769	1.16801238869328
RNU6-37P	-0.577497063920424	0.465501837008907	0.691387274204282	0.71075826104703	0.301154857155186	0.467815154308536	-0.0227964473703108	0.975113791827828	0.999999999999893	0.54588280088829	0.428031453229948	0.632779116991909	-0.0233741012132678	0.968417746945527	0.999999999999831	0.232055430547925	0.742281882712346	0.908093228363853	0.0671749353669228	0.925601965915123	0.999999999999901	1.67648837662216	0.0147667879808139	0.0319018281897151	1.6535182801182	0.0164820230949468	0.0342029312891975	1.74206167398265	0.00994866123319652	0.0216612349513435	0.29732783306581	0.689854574379472	0.874232672092903	1.32736365287793	0.0248267511328047	0.0459485759242727	2.30866905164038	0.000666872166973578	0.00189159382629761	2.81458602783521	3.48242472105769e-05	0.000104818878941252	3.63509522031771	6.34895161025735e-08	2.64452832395396e-07	0.0685391061779248	0.943229768825747	0.999999999999823	0.263278591850352
RN7SL731P	-0.798921292582902	0.0346597466348168	0.0828805533962154	-2.09677078352855	1.67048511419123e-07	7.35807470668115e-07	-1.5854607016636	4.00197406298669e-05	0.000155615120853887	-1.90758294885426	9.60526800785604e-07	4.29661207087128e-06	-1.05743087848952	0.00044453285139748	0.00107362273197759	-1.45277990668149	0.000119273809094005	0.000343512262878324	-0.843073734847709	0.0261579453277577	0.0521144270732959	-1.10832484825909	0.00560345802861584	0.0131103301193825	-1.10267461706762	0.00599770074679329	0.0134526775962144	-1.71542755991546	3.17163538784929e-05	0.000100340593942694	-1.53554595887261	0.000124890564895473	0.000348726119584894	0.204608101914913	0.513024588981868	0.684817040499082	0.654530200332601	0.113862711823321	0.199726072905618	0.169283614941861	0.693509813848938	0.868362534426894	-0.063819313316094	0.884116319103522	0.999999999999922	2.29340395898962	7.66570584406041e-05	0.000281596505914831	3.16200606135207
AL139424.3	-0.664431427879651	0.189292852288602	0.346426967709764	-0.990667244080098	0.0578276758095683	0.112053283205265	-0.231186309354407	0.632058083663265	0.838642950984569	-0.327163634124282	0.494286919587783	0.706140555150801	-0.297525902719637	0.446636853204707	0.629868897089502	-0.204720781927496	0.663200847900904	0.837427617936005	-0.196244116367097	0.68168352375708	0.855384619836608	-0.4686580967776	0.392469734106006	0.574187589157689	0.951248325122234	0.0481664000497286	0.0906143709087988	-0.520921276185571	0.33791186315862	0.49876449383796	0.746130422693008	0.113050351566817	0.193441268353082	-1.61793744994688	0.000719636897927075	0.00163109108670461	1.09760792120288	0.0299592611452928	0.0610786868997866	2.10362067460611	2.95941714564841e-05	8.96866027114833e-05	1.91115522955699	0.000215141770542105	0.000598832847988702	-1.27441826433426	0.0267782291909935	0.0608165398478272	-1.12220939794144
AL139424.2	-0.330821334485995	0.499501460366246	0.725957075608867	-0.74697488742026	0.136772169576421	0.239652267863955	-0.110048072650995	0.818870304404209	0.985364837213706	-0.954666928469522	0.0562698037617582	0.113263116568223	-0.0495142530350003	0.898131823751485	0.999999999999831	-0.47514466235912	0.323713218583373	0.475191318621475	-0.283761466221885	0.563928155455876	0.743030988038763	-0.422761482610353	0.428357403103515	0.615650018133711	-0.983095876772964	0.0795592270586216	0.142423890876875	-0.679054007760768	0.202610408264931	0.324024371304145	0.656660586839572	0.170504428757465	0.278097334017293	-2.12396710750245	6.31412776807975e-06	1.74870298541131e-05	-0.210212110584283	0.70453017363151	0.887095322918267	0.065621144352808	0.906717521465257	0.999999999999913	1.38987188939135	0.0104403067587134	0.0223835716013106	2.03371477045676	0.00273249714047616	0.00771103216588042	2.71617511781826
PGD	0.144318093407374	0.498864393378259	0.725228736959001	0.245541021561329	0.249795039545113	0.400853750262598	-0.0356801214507543	0.867190472645221	0.999999999999893	0.0296671820141549	0.889414492514055	0.999999999999901	-0.440737779474464	0.0086879899267908	0.0178797518191595	-0.287042525616776	0.178367017561256	0.285690796347492	-0.193853536668642	0.363639599553787	0.525445480455696	-0.0508069353421113	0.811815874690212	0.977253864881286	-0.140787984033003	0.509471283499262	0.690873715871121	-0.13742146890441	0.519552680295861	0.70193941183406	-0.345845596172844	0.105118488387316	0.181324988009828	-0.0150348059729046	0.933571333655416	0.999999999999938	0.19025149198072	0.431542485662749	0.612690646133538	1.73942508772572	6.22777285090086e-13	3.89436978068107e-12	1.39209224618497	8.50112213358445e-09	3.84533200072854e-08	1.86328755816268	2.94509982190844e-13	2.79184588174772e-12	1.85870938452615
AL139424.1	0.167061904734364	0.704892000723946	0.912705504638203	-0.914899238101444	0.0441879572804753	0.0883558224838141	0.35548552234651	0.415341825143353	0.61777809297452	-0.314927828012376	0.475555833209691	0.685870256581967	-0.640583043702703	0.0724778475990666	0.127636292004072	0.0421352545133746	0.922905156085049	0.999999999999901	0.389511179030505	0.3751917656003	0.53918777204355	1.15852182473533	0.00810282433557146	0.0183793454742848	0.921723754340926	0.03637178794697	0.0703963839732452	1.01869324972968	0.0197486217522631	0.0405805483605208	-1.88953421729429	0.00015938334315983	0.000440034841542746	-2.86699245739417	5.61732115197773e-11	2.22435376906227e-10	0.106032253059561	0.83212466322934	0.995836145886417	-2.87333000762455	2.2636260328158e-06	7.79941092935663e-06	-4.45768527819517	9.57368255793445e-10	4.7300257980872e-09	-2.33155958094171	0.000138826096657167	0.000489382711029448	-2.62499044549523
CENPS-CORT	-0.212639986078906	0.427959364129842	0.650958508562272	-1.63022440101251	3.11021393474437e-09	1.63485592252875e-08	-0.322691336701431	0.226705744684311	0.380687857046095	-1.12760014855875	2.99845692045115e-05	0.000110476317018039	-1.05729693807611	7.4051695604032e-07	2.31273166028589e-06	-0.798128878307241	0.00276372972019421	0.00652782703881614	-0.697085208600741	0.00968728351280666	0.0210117014332794	0.155612141265016	0.560743400452502	0.765071374459549	-0.252484514279073	0.348990672930093	0.509323459610059	-0.0420763286511208	0.87498991278509	0.999999999999893	-1.30395964622829	2.12767051570523e-06	7.21468054569997e-06	0.0354977444810885	0.875263818888158	0.999999999999938	0.461230575603652	0.125467928772568	0.217238683142986	-1.05879939511642	0.000888567432374001	0.00220822034604899	-1.08607063742028	0.000700077378459341	0.001812605344438	0.300996993211641	0.354882322897013	0.552087217978072	0.261003256092066
CENPS	-0.164345440069238	0.539477751734275	0.766000678089213	-1.59432288292941	6.22073623430345e-09	3.16753340907327e-08	-0.33000662651418	0.216060542277282	0.365873878313388	-1.11415839715952	3.64869180614263e-05	0.000132935278103892	-1.05061211415391	8.39020520697028e-07	2.60868782970551e-06	-0.824010469912588	0.00199321158725459	0.00481414140754275	-0.73567326950049	0.00630908198582695	0.0141658569857226	0.194135778255826	0.467379909874158	0.660296973724961	-0.26376563654635	0.327445835826408	0.48382992733373	-0.0523045680781379	0.84484681156676	0.987065094555639	-1.34736737492567	9.52391097233334e-07	3.33333438582361e-06	0.061817745354744	0.784363516890115	0.942374974531877	0.553935471454899	0.0653834115502023	0.122722019841068	-1.01318077232086	0.0013997874357804	0.00337894801356592	-1.00418400899094	0.00160317874293256	0.00393652638082777	0.376465225278423	0.24878743515704	0.416662722017838	0.236123492952191
CORT	-0.73391733986676	0.149587522365084	0.285543756322617	-1.74016288760219	0.0012100881212985	0.00327325351963162	-0.610865209024299	0.224971742400493	0.378301765412544	-1.30212430536666	0.0114100874418584	0.0271330331248164	-1.21431879013267	0.00311249553833559	0.00680996803210631	-0.96019136655678	0.0564501572465905	0.10332854491578	-0.919934726184949	0.0734222396894346	0.132066113877106	0.0911742129772182	0.8589810319004	0.999999999999901	-0.0716926387214297	0.889921419660125	0.999999999999893	0.131338223926366	0.795214565381164	0.94654278505506	-0.894362149769991	0.0901146116285515	0.158001888734928	-0.320400108861456	0.454563967815333	0.621909522772039	-0.0316416055901024	0.955347758275242	0.999999999999876	-1.69024300061936	0.00704319320886313	0.0152327475226396	-1.75125161204824	0.00625510112327054	0.0139886806938596	-0.00487802525749081	0.993625945327197	0.999999999999823	0.176102653558004
DFFA	-1.43076609888103	1.08162710158565e-21	2.59091376255584e-20	-1.99148510066256	3.03494548559461e-40	1.16054875869303e-38	-1.26130436337479	2.69834039331116e-17	3.65428627175572e-16	-1.79184290084302	4.7470149931921e-33	1.46726745217688e-31	-1.87374696012865	3.89363607991295e-57	1.02269398383326e-55	-1.92674799064838	3.1935705167035e-38	8.49739200244766e-37	-1.95868723930933	4.09415667684912e-39	1.18732998159006e-37	-1.71549057732906	2.10389666687026e-30	4.13202571930634e-29	-1.6300625111147	1.32005427494858e-27	2.05216883088837e-26	-1.9641257158652	2.61211982856163e-39	7.53748957493986e-38	-1.718418951414	1.55834335153722e-30	2.49525795908341e-29	-2.18764901639896	9.43799031780866e-67	2.71897871237621e-65	-0.766393005583993	5.71407721463398e-06	2.23178186637119e-05	-1.13271151840889	2.37497429731967e-11	1.31294218040039e-10	-1.14746836229551	1.30162297212875e-11	7.54780989537995e-11	-0.992147080400756	3.11168586734299e-08	1.78533590812196e-07	-1.08799698701875
AL354956.1	-1.04657273937222	0.000214123974669128	0.00085017854849505	-2.00952706235669	2.34831848052821e-12	1.636111333121e-11	-1.3433219714175	1.89044710582527e-06	8.8520073292891e-06	-2.02134515523431	1.31214166081945e-12	1.0647916215202e-11	-1.30382453982541	4.65277208302995e-09	1.7112122909144e-08	-1.38280332540865	8.14921665858361e-07	3.00390198449794e-06	-1.41991733390794	5.52116405453833e-07	2.10394886411046e-06	-1.35577349067279	2.05247371543837e-06	7.53238077815798e-06	-1.4752067959939	2.70902488471133e-07	1.03448834663791e-06	-1.8030394897469	3.63308785788805e-10	1.85708860342233e-09	-1.45833264685943	3.07783882432605e-07	1.12611979010002e-06	-3.79448381449924	9.81272743491671e-48	1.63910090260156e-46	-1.36783073445883	2.1246866787225e-05	7.63765217762648e-05	-0.984358109848842	0.00248786315323362	0.00579605964205231	-0.889545314398503	0.00624140986105141	0.0139598707167772	0.312413577559721	0.367282479335674	0.567138128089283	0.40602077756884
PEX14	-0.430167011786869	0.00446871148040647	0.0135434700500424	-0.429865604043129	0.00446605027168881	0.0109998090525663	-0.137923784893222	0.358525612823009	0.551024317686113	-0.446320219217703	0.00311374982941758	0.00830190268965534	-0.505285493300833	2.17448607977413e-05	5.99782620031738e-05	-0.443808555031179	0.00306240866960023	0.00718348824432993	-0.43362421076491	0.00405089719180591	0.00939467110265736	-0.254096814634407	0.092381225256072	0.167419339476696	-0.07702729446685	0.609642123320001	0.788445260817616	-0.259669181035252	0.0848004098884264	0.15120026281006	-0.0596389179477529	0.692092954470605	0.876133842959844	-1.23861967235315	8.17546969049376e-22	5.62268927138439e-21	-0.531592486586252	0.00191075616935693	0.00498954147735248	0.740216388547574	1.35053837080705e-05	4.25887147283976e-05	1.18345403893905	2.93737714480383e-12	1.79307085570407e-11	0.309539885847377	0.0833664930956447	0.16476916461753	0.517768170233998
AL139423.2	-0.282264011794788	0.737406648821856	0.938309885257065	0.134040781983386	0.870674620557557	0.999999999999901	-0.498765933956615	0.570248335192668	0.781570306383173	0.13456535050039	0.868568058623179	0.999999999999901	1.41725014488374	0.0239046810421608	0.0460236686529175	2.16663263458244	0.00271546892458004	0.0064229318022938	2.27240713468134	0.00154870694320499	0.00384616495346827	0.791366283115299	0.33392861384405	0.504469982432175	1.29300963220975	0.107213729741496	0.185797011952419	-0.240862722167196	0.783239409872599	0.936976733890593	0.722416118505512	0.365323815035317	0.533391956315939	-0.173583687529039	0.809951200156214	0.958921282485331	2.79012658327786	0.000438810481330899	0.00128358528575053	4.28919743125764	4.0676003281403e-08	1.67301467666473e-07	2.5936774156186	0.00169202562696152	0.00414191940252191	2.02666797771902	0.0196854806989048	0.0463019992916481	1.06320587757083
RN7SL614P	0.209033069749896	0.803676388656812	0.982297519362341	0.143209519406016	0.867850439476348	0.999999999999901	0.159149870092764	0.853277892133909	0.999999999999893	2.33455352504725e-08	0.999999979032682	0.999999999999901	0.846009355590314	0.207816863773298	0.328403840997087	1.1408196093637	0.138033751068997	0.228433343840596	1.20006623967536	0.129036673686947	0.217495070081142	2.33455352504725e-08	0.999999979032682	0.999999999999901	0.382117788688343	0.656320297465945	0.827968156676847	2.3345535130344e-08	0.999999979032682	0.999999999999893	2.3345535610858e-08	0.999999979032681	0.999999999999901	-2.33455407763832e-08	0.999999975191131	0.999999999999938	0.991638126142913	0.25370035115312	0.39619216134257	1.76668061124954	0.0287519738499649	0.0553995706743342	2.33426663068629	0.00390896513380485	0.00904742061966729	1.32345517487888	0.177341430693363	0.314083591893402	0.772579654874054
CASZ1	0.466440911022296	0.141562465193807	0.273138884419568	-0.438729468689674	0.170721195291099	0.290263835359613	-1.6274794476644	6.35067744165504e-07	3.15642834923673e-06	-1.31661990053953	4.7264082073218e-05	0.000169674623308632	-1.78906711953393	6.43902943410851e-12	2.85129045981707e-11	-1.56278330041926	1.2480931521171e-06	4.51023532402215e-06	-1.77793749302692	8.39347880699133e-08	3.47766809705004e-07	-0.806093936013883	0.0138934503099405	0.0301470359235076	-1.05730529663526	0.00142591791108508	0.00353222950159557	-0.890070830437477	0.00641219949682858	0.0144724099398773	-3.70763712257249	4.61650165980296e-21	4.46806792296216e-20	-1.70175694431586	1.18685179251805e-09	4.31169183587041e-09	-1.51073097928433	5.31293782120227e-05	0.000179973947490208	0.164160626587553	0.653812797875764	0.831995382802956	-0.277986379797868	0.454703733959301	0.632648811210019	-1.36692747833248	0.000265288597367028	0.000893125042678806	-0.38147159468261
AL139423.1	0.234936608402008	0.464317842980589	0.689998488340331	-0.547268574462466	0.0929217467904012	0.17096739026633	-1.58773753680871	2.24920234382765e-06	1.04233857662501e-05	-1.27760017476355	0.000107423118244775	0.000368276293327745	-1.74748090298383	8.84462826336044e-11	3.65531210306543e-10	-1.66568826730671	4.7533738271704e-07	1.79706879360464e-06	-1.58681410906077	3.06824757798933e-06	1.07793115033828e-05	-0.390333193916587	0.240611156048072	0.38462322631484	-1.08143559289602	0.00184055975555284	0.00448457838618916	-0.585311237108126	0.0782546060715752	0.140776632911989	-3.36140611398323	9.23384325053305e-16	6.43429414517481e-15	-1.85039159459172	3.45587749435207e-10	1.30111783808322e-09	-1.82802024570006	3.65230122690534e-06	1.4666543604333e-05	-0.098810741107442	0.793933522873078	0.944570634055474	-0.423013767401936	0.275397163391579	0.416024134656966	-1.42827769211047	0.000142924970193814	0.00050296854779447	-0.728080647684496
C1orf127	-1.26521998931391	0.0120869632878176	0.0328359722122522	1.83224172703214	3.32391210512959e-05	0.000112117425745369	2.65287059532684	1.18370891806999e-09	8.02912954665025e-09	0.437618603792237	0.333107177903565	0.51891644714444	5.19856767349035	4.85955008159839e-50	1.03129525970861e-48	4.80524222370361	9.05111668300811e-29	1.52980317018571e-27	4.84948344160491	3.45098371070808e-29	6.15086348703323e-28	4.59170558516954	2.90099720142185e-26	4.57995879975128e-25	4.74941561276425	5.3465803187824e-28	8.52942973719434e-27	4.86667432580706	2.21870763633781e-29	4.02477314200035e-28	6.64941462396918	1.36302573114908e-53	6.08805574264767e-52	4.2217406583555	9.70541295588323e-30	9.03044832706853e-29	-0.840196527152909	0.13190222050706	0.226658971255066	2.23298226047442	9.31625344149762e-06	2.99344472549684e-05	2.18503379297755	1.66948628441778e-05	5.33747041217545e-05	5.05017483409904	3.21852355416519e-17	4.31055846691526e-16	4.42267106883738
CFL1P6	0.662608188967029	0.1991857655034	0.361367976536625	0.896714278593912	0.0793064506134076	0.148543751859458	0.888278760040941	0.0805981607653832	0.158779519562699	0.518816599450723	0.311163050320787	0.491201587088974	1.9874561126929	8.34523761387557e-07	2.59503240485236e-06	2.01616202028644	4.23371179202793e-05	0.000128900642318584	2.04569336071152	4.0493383776487e-05	0.000125210077564562	1.99800303838255	8.42812849765939e-05	0.000256298396817299	2.16965867651799	1.76848762336104e-05	5.60432375316687e-05	2.42143147298578	1.21101482721751e-06	4.49510509140922e-06	1.03132563227108	0.0466096302161165	0.0872406609829826	0.972530109993521	0.0277725608641069	0.0509959073861053	-0.392075367784517	0.524937370116222	0.716583866928282	0.622480304023868	0.292815634858206	0.432804476219173	1.92496067435779	0.000946831049648705	0.00240672257235219	-0.180802455065641	0.794681066903437	0.97560489532234	0.494247185444004
TARDBP	-0.416746919853412	0.00801863802288647	0.0227520665717857	-1.3738947527391	2.53956962024642e-18	2.80535741585248e-17	-0.869154194201926	3.21232130030659e-08	1.86344616557267e-07	-1.25355340469245	1.59561060908336e-15	1.67138310942376e-14	-1.08262004880058	2.11169241952195e-18	1.31960120387418e-17	-1.32464288753878	3.41783901016736e-17	2.85842196470999e-16	-1.22414809327802	7.04880153726874e-15	5.21762320982863e-14	-1.24014621088119	3.21883003782877e-15	2.47621605311532e-14	-1.46425160910618	1.39160079126933e-20	1.4293334763468e-19	-1.23149253406565	4.87139714293571e-15	3.64559865083736e-14	-2.10197192590688	1.43023851493735e-40	3.70170827624742e-39	-1.96623287686064	2.35875419881374e-49	4.14940830681212e-48	-3.15080017668345	7.47405420484207e-69	1.27451498066812e-66	-3.90587907939911	2.27109891988638e-101	7.35026971052978e-99	-3.87923373484225	3.74707023973895e-100	1.31104417719191e-97	-0.146525369443779	0.438363030641416	0.649833813852458	-0.33298346376404
MASP2	0.0059445244248225	0.981914824967517	0.999999999999893	-0.952968400542947	0.000386644933427852	0.00113428196765756	-0.938785773981924	0.000418330159896021	0.001378202103711	-1.21591699348108	5.6790411477797e-06	2.30598721935321e-05	0.871684976355661	1.99747503248904e-05	5.53053273311514e-05	0.45838306822624	0.0732261766416694	0.13042342658741	0.323931075854397	0.211961648356199	0.334061635806927	-0.340741854112618	0.205579108294431	0.335950751850495	-0.58675849836429	0.031815232499023	0.062299719668215	-0.16795107683436	0.525994260451376	0.709005561035888	0.217430945301986	0.405567222893766	0.581599172092973	-4.68237657127885	2.23025972675361e-45	3.47763959732645e-44	-2.4112198098117	1.19008543466444e-12	9.92312593414803e-12	-1.59926411245145	2.92628165689824e-06	9.95412487940363e-06	-1.96297212682458	8.99112180638712e-08	3.68928098653046e-07	1.84248933598946	1.91989019456341e-07	1.0050964548442e-06	1.54667750269067
SRM	-0.433539543713377	0.100076849254315	0.205553966789551	-1.17158617366793	9.04634445654075e-06	3.28379724145464e-05	-0.279417700920424	0.288834423496812	0.463691940685118	-0.977636790191408	0.000210063983273229	0.000689190522441394	-2.22762828169823	9.34614586347988e-27	8.46263767093549e-26	-1.90363169973138	5.26757960427278e-13	3.29210113950242e-12	-1.7388481557406	4.65396068332428e-11	2.56466211135162e-10	-1.80007066456283	9.95924240163256e-12	5.94204479789861e-11	-2.09557003615089	2.55953721849281e-15	1.85750283591865e-14	-1.69737387315114	1.31481732961981e-10	6.9721627974013e-10	-2.53042396550376	1.45287043791387e-21	1.44548954531485e-20	0.531902657713508	0.0168815770021528	0.0320434880762698	-1.45988788541582	1.08375730709771e-06	4.66615426126589e-06	-2.59727904214224	9.75838516445636e-18	8.67052949504193e-17	-2.0088217489057	2.53416946353088e-11	1.433390467832e-10	-3.96024253921819	2.30511943185894e-35	1.14137239625493e-33	-3.81424201029711
EXOSC10	0.355197265244017	0.0180715293054689	0.0467750591672568	-0.636079292212588	2.43922851656302e-05	8.38553059709352e-05	0.0469542256776676	0.754511370452477	0.939177675460847	-0.533469943189064	0.000394793382851267	0.00123527427611024	-0.45927976335948	0.000105979115701777	0.000273273891855148	-0.406794990197083	0.00670036339213942	0.0148120225924486	-0.368847557731977	0.0141964244138456	0.0298251308651879	-0.332056420440198	0.0273751188997747	0.0560752329679781	-0.502008494253215	0.000864790053344168	0.00221337709957837	-0.452096868395045	0.0026582979323306	0.00641055847608232	-0.889101785455504	3.77921948681251e-09	1.63239739472794e-08	-0.353731254574685	0.00544706414311555	0.0111028297417085	-0.0364394947287252	0.830608811043042	0.994586103747066	-0.580478949410715	0.000698059517304538	0.00176140804914632	-0.353992293522053	0.0383435017294105	0.0736203763460907	-0.532467088758783	0.00321831998732419	0.00895047284316942	-0.551900582700893
AL109811.1	0.397439776684144	0.0258706341616693	0.064132833686422	-0.735443468623297	5.24872521469166e-05	0.000172777533045444	-0.000813703138835731	0.996354533324517	0.999999999999893	-0.713966667757862	7.82592197662641e-05	0.000273192843887818	-0.222353262354959	0.117096006146587	0.196620103110753	-0.272701362189385	0.124040714573738	0.208001576804361	-0.211277367784707	0.238970247193554	0.369780485828789	-0.155545898101019	0.389062766558956	0.570299137518831	-0.320681532474695	0.0777087958856851	0.139465440397117	-0.0114806081869999	0.948906123061602	0.999999999999893	-0.463638571468932	0.0106648962866894	0.022559604166347	-0.408885755983802	0.00750920172358651	0.0150035912297918	-0.326985386729263	0.109063285677053	0.192453892421868	-0.576882836781174	0.00662677628222953	0.0143916438610423	-0.269466218151486	0.199675290451783	0.317565388427599	1.25768950887385	2.09964911144106e-07	1.09290495952773e-06	1.05127142902243
EXOSC10-AS1	1.21407470030394	2.90809239247529e-07	1.81729805984066e-06	0.492307160000539	0.0395748152419814	0.0800615841119304	1.17189100325612	6.22182190607452e-07	3.0949894837536e-06	0.525196880419623	0.0271595152777081	0.0593721634367577	0.939520107327841	6.69838536437372e-07	2.10007445399891e-06	1.12552590666003	1.47312195339397e-06	5.28551611419126e-06	1.19162165711464	4.42262160213264e-07	1.70398625854211e-06	1.11389417385752	2.88132805939739e-06	1.04130356531363e-05	0.887648459254132	0.000213444785134351	0.000593401878370394	0.694827123165018	0.0037041752714206	0.00871515302565596	0.595046400507643	0.0131584200064453	0.0273851159906973	-0.84923456510229	6.82255406327782e-05	0.000172379682259301	0.705260819952329	0.00880157580738317	0.0202050860457224	0.502439897020207	0.0729805913979233	0.128202522707058	0.380673706976286	0.179147309209609	0.28939309685554	-1.04999397968789	0.000777821650931048	0.00242809683617697	-0.988418363277862
MTOR	-0.597919374606845	0.00277530319422923	0.00882035907863864	-0.522613805630192	0.00889823306159879	0.0207468177514204	0.176585044214879	0.376186121702213	0.572214256961096	-0.327282135871286	0.101208336387749	0.189743076353949	-0.589881810887213	0.000174963205749113	0.000440351935738326	-0.488413927752164	0.0143605527094168	0.0298049090922307	-0.432326656528803	0.0303900083479105	0.0597802396735991	-0.661113410261623	0.00093838728982624	0.00248440744188959	-0.676589674687397	0.000711385103767328	0.00184352085509421	-1.01279885786615	4.04490445087086e-07	1.57388098472641e-06	-0.85466896575369	1.89962270155491e-05	5.84879695387407e-05	-2.26611649571713	1.04796396466444e-40	1.40150998031147e-39	-0.348140548775656	0.12413243230616	0.215220675998007	-0.475329769553449	0.0359546423773697	0.0678413950673128	-0.47043682661317	0.0378860784281762	0.0728366363187767	-1.89112919609351	2.68505048676435e-15	3.03793364894103e-14	-1.8504999088471
MTOR-AS1	0.0335152835045323	0.920305568459898	0.999999999999893	0.368768545452865	0.264315830747359	0.420224468571025	1.0278321796134	0.00152893411643915	0.00453315722183255	0.517743548351366	0.113360330082175	0.209336867610805	0.682023926987654	0.00918675248755484	0.0188458795281263	0.724218344105343	0.025107488807491	0.0496007741601226	0.726716637345979	0.0268246722396315	0.0533373014735158	1.01070729921553	0.00223778035466942	0.00560000771321385	0.778229806002925	0.0197375851674887	0.0402949395175324	0.420278495594225	0.210161025328741	0.33422133634494	0.583349768470199	0.0788183910469547	0.140224875095614	-1.29453631996412	2.33832019856494e-05	6.16612333523483e-05	0.180532457163857	0.632012875787287	0.819334069857499	0.262864627091846	0.503368697375268	0.674235417904384	0.68835692287329	0.0753522238410314	0.13519382603978	-2.37549403458483	7.10488521619271e-09	4.38595743540637e-08	-2.1845968161864
RNU6-537P	4.6036477492439e-13	0.999999999999591	0.999999999999893	4.59502189673553e-13	0.999999999999592	0.999999999999901	4.59883576012082e-13	0.999999999999591	0.999999999999893	4.6010536292621e-13	0.999999999999591	0.999999999999901	-7.63353647607441e-13	0.999999999999138	0.999999999999831	0.366817187052089	0.665726919462029	0.839652915681608	0.0724506112988278	0.933730940014247	0.999999999999901	4.60062453869912e-13	0.999999999999591	0.999999999999901	0.456440172510211	0.598965066849177	0.779516003492246	4.61249509721695e-13	0.99999999999959	0.999999999999893	4.59306594104738e-13	0.999999999999592	0.999999999999901	-4.57356496733645e-13	0.999999999999519	0.999999999999938	0.117505127165046	0.903331506485862	0.999999999999876	0.0313143158994472	0.974197328150101	0.999999999999913	1.3773613743514e-12	0.999999999998921	0.999999999999922	-9.18563030799484e-13	0.999999999999317	0.999999999999823	-9.189635593173e-13
ANGPTL7	-0.0600177199876749	0.950829025314252	0.999999999999893	0.357001634824715	0.708740257027793	0.902754099934313	0.118545002917385	0.902952690488152	0.999999999999893	1.14055789059115	0.203379901897183	0.344930088860263	0.47438837198953	0.532219059389659	0.7237413235585	1.09907992494985	0.223465955760283	0.346765427709625	0.517550699447025	0.577198311624881	0.756169806311081	-0.299426593563283	0.768191487288608	0.941467616281019	0.856940128704618	0.368764737236348	0.532620085394691	0.54585132986307	0.573573376961366	0.759911527669379	0.359040398953302	0.711533773626886	0.893746170801696	4.55397916395984	9.32912533099165e-10	3.41908156533326e-09	3.3832644188689	0.000311543242305442	0.000935460902934808	3.67431368783795	0.000102016336940038	0.000289162623885598	1.1321190418915	0.265556085757526	0.403098164647416	0.271487445363205	0.825780031830092	0.996509589299971	2.2757145854144
RPL39P6	-0.487729061737303	0.341729248784046	0.551080995657926	-0.934156221916183	0.0800246791077787	0.149749856962498	-1.33486806516604	0.0155853061519491	0.0374353252669389	-1.60150026385478	0.00398082004284968	0.0103931459376494	0.322355384446468	0.411313517384046	0.589030270997643	0.0395479539353636	0.93454302436026	0.999999999999901	0.0421230671028385	0.932260339647959	0.999999999999901	-0.42020950208266	0.455495863851072	0.646439143471145	-0.78444732120345	0.173390602725004	0.282263910842645	-0.0414814954089817	0.937632744144144	0.999999999999893	0.094585343875965	0.853981654469794	0.998152787283747	-1.65286057923245	0.000838093039705025	0.00188556972541872	-1.03565968885359	0.0893282811601319	0.161598804387628	-2.83283122690074	0.000240151657710881	0.00064769652558555	-2.94887162907482	0.000135823236788487	0.000388431803756459	1.0279694841727	0.256941290236118	0.427939311661073	0.291679367926024
UBIAD1	0.240834292648428	0.195129064390929	0.355386783414339	-0.490948309537794	0.00867647314886648	0.020279620971691	0.287421204285353	0.12070720242859	0.224455620246401	-0.478457605477044	0.0103631520193812	0.0248733131206473	0.0428242040632952	0.770223614141782	0.944466978478782	0.307216730549584	0.0961494498233117	0.16606464999051	0.296624001905785	0.109793230316306	0.188575057878521	0.321930846883549	0.0831078196537021	0.152494021373774	0.328470079227315	0.0772724207702571	0.138756076177474	0.410386637374098	0.0268445112954149	0.053681067651406	-0.312000830047378	0.0949014842324097	0.16551303348624	0.530500043251004	0.000730735577631578	0.00165506167276637	-0.172512517172419	0.413625154618179	0.591965061060028	-0.26858374198423	0.208643524304981	0.322840722497006	-0.530692242396571	0.0136480532975096	0.0286801860200041	-0.706505216144676	0.00153513256413833	0.00454098922488585	-0.352177186018293
UBE2V2P3	-0.0869736648798867	0.670343304082779	0.882623666377473	-0.578979214258029	0.00493281766939732	0.0120573617545102	-0.268623003041442	0.185612134480917	0.32273568654894	-0.673272759724475	0.0010255255665401	0.00298302755443441	-0.658350283058493	5.30859335582199e-05	0.000141012804141908	-1.15393435954522	1.6407758508189e-08	7.12342938715333e-08	-0.751492752291146	0.000276945443799222	0.000766356727469811	-0.436914808457909	0.0355421505469904	0.0712418865623656	-0.691973693211167	0.00101988220478508	0.00258483612551952	-0.632533231632431	0.00233346391750349	0.00568115838939864	-1.24379149048473	5.69333605033412e-09	2.42312398686792e-08	0.507436769088821	0.00304735393002287	0.00640718561690212	-1.45634310649194	1.94350258110063e-09	1.16293279445206e-08	-1.98557081770752	3.49654207500164e-13	2.22790006484324e-12	-1.22590856730332	1.91829009608732e-06	6.84218322397643e-06	2.6296207143801	6.64743258023267e-18	9.4154354660405e-17	2.5432319695222
AL031291.1	-0.212909528519914	0.806037904336717	0.983216609487068	-0.212909528519915	0.806037904336716	0.98127040327686	-0.212909528519915	0.806037904336716	0.976552681196067	-0.212909528519915	0.806037904336716	0.985312124501257	-0.212909528521193	0.74610529846568	0.9253148497654	-0.212909528519914	0.806037904336717	0.957378767858567	-0.212909528519915	0.806037904336716	0.959670962772403	-0.212909528519915	0.806037904336717	0.97272718692343	-0.212909528519915	0.806037904336716	0.953348001581287	-0.212909528519915	0.806037904336716	0.955621125094834	-0.212909528519914	0.806037904336717	0.961422057612625	-0.212909528520874	0.766107116157071	0.927149059831561	-0.212909528518956	0.830684738070198	0.99465350365991	-0.143443343182487	0.870212588044756	0.999999999999913	0.44084362115248	0.616102102387283	0.797291394924919	-0.512236774962207	0.623771121985396	0.830377199895926	-0.512236774962207
DISP3	-5.13594344323614	2.68172405842697e-14	3.55633350218739e-13	-7.24989986169358	3.90600658782347e-20	4.87978452150787e-19	-7.25082343273642	3.84759347046253e-20	6.37267786690878e-19	-7.5436193168728	1.01430182543889e-20	1.54049677243188e-19	-6.29198308601824	1.4669076349998e-30	1.55221337714202e-29	-6.28268263514723	5.67073695143268e-19	5.31712654684344e-18	-6.04810362339252	2.86031650300553e-17	2.49301063423219e-16	-7.29113241073231	1.10453268923183e-18	1.0817890215876e-17	-5.8105605864983	9.06508720571388e-15	6.35983253135759e-14	-5.97145589093783	1.0055316865136e-15	7.87961185730641e-15	-4.66696701896105	8.3222891976092e-12	4.42437735307121e-11	-4.47787302189221	7.18554666672144e-16	3.73097392334195e-15	-4.31050518766234	9.54869435517809e-09	5.28817030412629e-08	-5.15528201230808	7.00128738593297e-11	3.72225528445346e-10	-7.11472803541779	2.25633724592034e-15	1.75224822443751e-14	-7.21903892026888	2.93193688995672e-17	3.9390188529831e-16	-6.93932253466396
AL590989.1	-3.80798500615617	4.89328309491381e-09	3.82372230859294e-08	-4.48372170738178	2.20251266773092e-09	1.1746653282927e-08	-4.48372170738179	2.2025126677309e-09	1.45246532019551e-08	-4.3659137693471	1.12316059708058e-09	6.95031950397578e-09	-4.27591851936249	3.30804922527193e-18	2.04884695011807e-17	-4.48372170738179	2.20251266773095e-09	1.02780383249227e-08	-4.22794986692452	9.96919132377626e-10	4.92081318270438e-09	-4.48372170738179	2.20251266773092e-09	1.07781634067929e-08	-4.48372170738179	2.20251266773092e-09	1.01770606363695e-08	-4.03589578070864	1.52606754813851e-08	6.79652306555982e-08	-3.55826338453736	9.1046742807321e-08	3.49290513904238e-07	-3.30773977666983	7.15271153587345e-11	2.8112387742189e-10	-2.86581104805501	1.78522031413432e-05	6.49201321387568e-05	-4.48372152227092	4.78002783066468e-07	1.77449409387991e-06	-4.46011524731896	8.53089361139883e-08	3.50877890293142e-07	-4.67728566401448	2.39331993439247e-10	1.71761248466875e-09	-4.73066710275924
LINC01647	1.18332027143175	0.102690964082086	0.21001918302574	-0.519930242470472	0.553548964155618	0.757991961815652	-0.519930242470472	0.553548964155618	0.764870320046603	-0.51993024247047	0.553548964155619	0.769183730986435	-0.264163554882041	0.685412819037126	0.875121823800793	-0.274836490182434	0.739794903285841	0.906206605638035	-0.519930242470472	0.553548964155618	0.733096989681118	-0.0608711703304848	0.942662425668909	0.999999999999901	-0.519930242470474	0.553548964155617	0.737955928648968	-0.519930242470473	0.553548964155617	0.738435256137218	-0.519930242470472	0.553548964155618	0.741760825593499	-0.339988050770407	0.63307948768808	0.808465763974141	-0.276221694177031	0.763881524833725	0.942219768795149	-0.470616098002674	0.611859016528494	0.789453911977002	-0.459191218964634	0.632087496850304	0.813242567317613	-1.00536720045353	0.328594390359337	0.518621177366568	-1.00536720045353
AL031731.1	-3.21279478805091	9.28163283081053e-06	4.65629237498935e-05	-3.0939719798118	1.89949483740566e-05	6.62038070248751e-05	-3.26068757815463	1.62767315951389e-05	6.74087296475168e-05	-2.22435449265866	0.000418591316289087	0.00130374848643693	-2.82237352493929	1.03896124649633e-08	3.72133475188309e-08	-2.11030636337313	0.000495877151366054	0.00130919470816669	-2.41929098813437	0.000128565419148173	0.000372311722967827	-1.58330533277253	0.0129791956362731	0.0283259042622255	-2.16634424175162	0.00127082525040709	0.00317165807330691	-3.26068757815463	1.62767315951387e-05	5.34155877698741e-05	-2.97768662823912	3.74672658039337e-05	0.00011145710895601	-2.81395280386805	5.00468837717999e-07	1.51359994954412e-06	-3.10385981377556	0.000209052232714869	0.000646574618508535	-1.29330263807328	0.0523686424208732	0.0953048924748744	-1.68986966221219	0.0197230894523207	0.0402522658380769	-2.12165328836073	0.00858603892479285	0.0219065961267387	-1.17151562409489
FBXO2	-6.76201003265708	3.05141966316419e-30	1.26883724145147e-28	-5.01710507163712	1.21199413122606e-18	1.36693383328977e-17	-5.55999311862756	2.88345567091635e-22	5.53682095638519e-21	-2.97611628556742	1.02108338482746e-07	5.13706360626715e-07	-2.50759834399322	1.14116188731763e-08	4.0717833815929e-08	-2.06854068151386	0.000204872383632329	0.000570935120028037	-2.68655219487351	1.54884950280926e-06	5.61717640988336e-06	-0.677298959839727	0.223965893536293	0.361576016020795	-1.189230050512	0.032896347328867	0.0642276911124118	-1.66020333279635	0.00290835129880189	0.00696768221846655	-6.83888189790501	1.40617349340755e-28	2.03960510934344e-27	-3.53208598270478	9.38782958937841e-14	4.36198181085926e-13	-4.61278254840263	8.07086320602936e-13	6.83654353458041e-12	-4.80687388222221	3.08789658463968e-13	1.97627671292049e-12	-5.88343314494927	1.76542930848183e-17	1.60525418579657e-16	-2.00021997019114	0.00265834737407064	0.00751885245847405	-2.44904924599204
FBXO44	-3.97848126798862	5.92414526362266e-41	4.49901687809877e-39	-3.28206468922247	2.32468868943096e-29	5.03141682209593e-28	-2.71340717569523	5.56122216352096e-21	9.80572793349159e-20	-3.02096254080086	1.99489140080729e-25	4.01242751481293e-24	-1.06984641902204	2.06330007741393e-06	6.22746835891791e-06	-0.85447542555988	0.00277659671953222	0.00655661767702865	-0.941100546485451	0.00101374240028048	0.00258870089894777	-0.331068482472829	0.247052273751336	0.393579885330436	-0.627834116303716	0.0283442146029005	0.0560582676769893	-0.647323486550447	0.023657130564342	0.047816909700619	-1.54108854219434	8.17195468625167e-08	3.15006744790861e-07	-1.16929606752125	1.39312123868265e-06	4.06452089719001e-06	-2.5437341736099	9.26638645446293e-15	9.41812980880453e-14	-0.882262646194629	0.00675828006426177	0.0146509740095026	-1.40715908366314	1.71325028768298e-05	5.46928300641685e-05	-0.913927182228224	0.0077052730168073	0.0198729992626222	-1.3622498611962
FBXO6	1.99853171533501	1.27540709150114e-05	6.26848452619283e-05	3.77566476724856	1.05962515231771e-16	1.0302964320214e-15	3.91033929447227	7.89856723068391e-18	1.11109178164329e-16	2.83023629795006	5.28799035237525e-10	3.37239231793603e-09	2.9472799930972	4.06678554024219e-16	2.26004502820578e-15	3.4064643321613	6.67555309704107e-14	4.43201386169596e-13	2.9734921686244	6.80509569823091e-11	3.69411844024828e-10	4.25763412158734	7.74599729173977e-21	8.75460577087215e-20	3.82728282708727	4.14583565713447e-17	3.40645049462621e-16	3.32483128142429	2.84200144164425e-13	1.86325637888896e-12	2.43487904871206	9.95156248383112e-08	3.80362620125128e-07	5.16344129568061	1.13950469274189e-40	1.52232536714866e-39	3.30252491312469	1.36037830562179e-10	9.22572571860223e-10	5.81560125018214	8.53051967594641e-30	1.62045451349792e-28	4.74704485773997	2.39925382131433e-20	2.67356489410631e-19	3.2250472963796	6.41377084453043e-09	3.97438401394574e-08	2.77826405363695
MAD2L2	-3.45977443100199	1.23110720080307e-69	3.07692120869495e-67	-4.00711615609135	4.7096577442782e-92	1.13910137031985e-89	-3.62049096823159	1.89235452664801e-76	3.85298063686517e-74	-3.70940118892963	8.99539288530276e-80	1.74752666683032e-77	-3.92840661835734	2.64601224369064e-143	4.76388044354063e-141	-3.90810552993843	4.0324611166213e-89	6.07670534561751e-87	-3.98915925474432	1.50263148880097e-91	2.55939411999188e-89	-3.00031685127842	3.72790754427289e-53	2.00144363639414e-51	-3.3507864037529	1.89764052777308e-65	1.44578783242608e-63	-3.29993152035393	7.38075512339311e-64	5.6415004816136e-62	-4.40505750751335	1.42198282899408e-109	3.56401945010003e-107	-2.8959324901532	5.1120658774992e-69	1.55126236328235e-67	-2.47087655756512	5.25198781077164e-29	1.51995528379623e-27	-2.16728337723824	1.18815537264637e-22	1.45865930919267e-21	-2.68409469319384	1.17619559493383e-33	2.93527404782934e-32	-5.61610067243842	9.16292044627238e-121	2.88552582080379e-117	-5.38714789024995
DRAXIN	-7.61820332214237	5.6678958795179e-30	2.33829168262696e-28	-9.57126773599147	4.57614211062175e-34	1.26927593071735e-32	-9.78868845607903	5.09945279532862e-34	1.95839716823527e-32	-9.37382443220595	3.60357820814805e-35	1.25859847409925e-33	-7.9853451972255	1.32520734135899e-51	2.94093862295047e-50	-7.66539684596484	4.09370220819497e-30	7.42499650982434e-29	-8.08055039029949	3.91024170961692e-32	8.13898976847242e-31	-8.37727693050309	7.32664111852296e-29	1.32788164416003e-27	-8.83345628556867	2.63902427320638e-29	4.52484898705808e-28	-8.09637301149882	1.09702539441312e-28	1.90445382417835e-27	-7.5679566996321	4.25668910856113e-27	5.70700726852627e-26	-4.17857609963168	3.65648070681419e-15	1.82990239009201e-14	-3.91094018128299	4.03733683584698e-08	2.07630951856525e-07	0.742637620259485	0.292434388819883	0.432327346226055	-0.232535428739119	0.741840989420673	0.919838928208082	-10.1245759547058	1.47533227430226e-31	5.70763887315447e-30	-11.2619802975034
AGTRAP	-1.63526300388799	6.07883770593258e-15	8.49544546494488e-14	-0.959916134969586	4.14980740394773e-06	1.56655715273266e-05	-0.824375587898685	7.37048222832675e-05	0.000274964041241092	-0.326592327202161	0.116076837893609	0.213725063924617	-0.663628112073317	5.06393563998197e-05	0.000134846725902838	-0.543851630021275	0.0087396526510464	0.0189130415465068	-0.847247286705816	4.71309517117721e-05	0.00014461563762471	-1.17349129522567	1.91829014779956e-08	8.62713362955636e-08	-1.05517195227074	4.35023101602722e-07	1.62804517908476e-06	-0.587837209049105	0.00470626453990103	0.0108693012306901	-1.08139388408741	2.18178538229212e-07	8.08607909114438e-07	1.26337698624514	5.70562554869248e-13	2.53080321894447e-12	0.370798140168149	0.114800957732081	0.201204599276706	1.64150433135233	2.7010695639328e-12	1.6034297116292e-11	0.554633405873961	0.0184028170638978	0.0377541728148575	-0.169401990802621	0.496136475293609	0.718036664219009	0.331878840755869
C1orf167	2.79719438289042	4.70038774237666e-31	2.04637986900135e-29	3.93248128750662	5.36905028962233e-60	4.54050821083743e-58	3.17083928904714	1.38890667152531e-39	7.05460047772485e-38	3.78451090242116	1.06298556884966e-55	9.48704814058387e-54	2.47123071792301	6.20945225582557e-38	8.75387786555182e-37	2.82340384678116	8.93079702538757e-32	1.76980518029116e-30	2.87803864726163	7.68724533779429e-33	1.66229378062192e-31	2.06779204826962	1.3335569490658e-17	1.21507158216538e-16	2.34809906957815	2.80031841726221e-22	3.19745325299046e-21	2.28011183336532	3.83590229365367e-21	4.28461850662848e-20	3.25451308475261	1.44711917724729e-41	3.91726334420724e-40	1.0014478521345	1.33504469981996e-06	3.90069654246463e-06	-0.0680498769835664	0.808163788182043	0.97511049949417	3.02255759503084	1.57722938597299e-28	2.77612744030726e-27	2.57197446129976	5.29491454741065e-21	6.17120324124614e-20	-0.241230277620113	0.410825862151054	0.617834487438056	0.0105270224153243
C1orf167-AS1	-2.02507605489048	0.000857969326387565	0.00303944030827729	-2.61379900128974	0.000232942179543589	0.000703949025492722	-2.23940252581154	0.000535618563929018	0.00173152300193779	-2.48609365937634	0.000231041850788734	0.000752503868044938	-2.61379900129096	4.56738531954962e-08	1.56128013363864e-07	-2.61379900128974	0.000232942179543589	0.00064359790102022	-2.61379900128974	0.00023294217954359	0.000650884476147302	-2.61379900128974	0.000232942179543586	0.000670202346461778	-2.17003050904795	0.00125514645272881	0.00313550970371521	-2.61379900128974	0.000232942179543589	0.000658316412006982	-2.61379900128974	0.000232942179543589	0.000630313366396041	-2.61379900129066	1.65111198973704e-06	4.79018261054145e-06	-2.61379900128882	0.00194036166312599	0.00506032733216677	-2.56244465209971	0.000524663759259344	0.00134611620897422	-2.03674966091738	0.00348009412468985	0.00811499590484147	-0.389557655560179	0.636893385781761	0.842691601472593	-0.666738442078423
MTHFR	2.86692761025681	6.59148894158021e-44	5.78740080173651e-42	3.78702969353819	2.12916072005909e-75	3.13051341979995e-73	3.22458193983465	3.76937406079087e-55	3.82089962466906e-53	3.66776203350999	7.63848603386914e-71	1.11348049379589e-68	2.34236192752078	7.96830210394372e-47	1.53988526724574e-45	2.64970951556284	7.94398959677078e-38	2.07716004737618e-36	2.72860152575405	5.87304883900107e-40	1.75911449838389e-38	1.93546493299319	7.17146058282947e-21	8.12233815905432e-20	2.15337376284397	1.82814491486862e-25	2.5235558545777e-24	2.05407784776723	2.49106880730861e-23	3.18717814872255e-22	2.92303356176403	1.29959189472077e-45	4.1605002464148e-44	1.25249159007389	8.78718091817915e-13	3.85712917994541e-12	0.27986043370368	0.233993571396481	0.370130502122125	2.95894505781946	8.74806722952914e-37	2.39937057916688e-35	2.36400670547134	4.8557704226635e-24	7.00212642152002e-23	-0.0180630165324091	0.942034512972125	0.999999999999823	0.207338267999353
CLCN6	1.48041443188453	4.67866159598779e-14	6.05827680399329e-13	1.10548338696382	1.82259607101706e-08	8.86520258856797e-08	0.70220416669198	0.000350465392260293	0.00117078928234392	0.792805236637412	5.47467904576655e-05	0.000195204956618571	0.834063985828803	7.32526518164729e-08	2.46788281943446e-07	1.01712747068435	2.12998740992318e-07	8.35635693270188e-07	1.16752618101436	2.72670968464339e-09	1.2937628992178e-08	0.428894821498759	0.0293426286650629	0.0597738977686806	0.382119375699049	0.0523746410276897	0.0977255853304226	0.477300284359944	0.0152234750312221	0.0319477226909164	0.510527996935019	0.00945278860278455	0.0201845035350268	-0.468953249409688	0.00502970623312189	0.010294798815175	-1.33398066484462	3.41410745895521e-09	1.98999754133094e-08	-0.0880819012950529	0.694628979943606	0.869196831269355	-0.547765537269888	0.0151960019528017	0.0316798006812646	-0.00301153012921529	0.989870150492905	0.999999999999823	0.526975747009413
AL021155.2	4.06892847992663	1.72992032843252e-11	1.75056226551343e-10	4.68799909716612	4.54044796167703e-15	3.91366873218466e-14	3.33927568855645	4.8253747152351e-08	2.73928885258455e-07	3.64594937290736	1.68054161694021e-09	1.02319496080867e-08	4.99744600451976	1.76529087007204e-21	1.27779702146399e-20	5.07101648891798	1.06829522941618e-17	9.2230314354005e-17	5.23035009122828	1.56627492562485e-18	1.4844321508082e-17	4.63683158772489	2.56689455434423e-14	1.85381293337255e-13	4.72658197978465	7.37264357491373e-15	5.20959707626328e-14	4.87823679151421	5.39675076523137e-16	4.31201481558245e-15	4.20245423051241	5.21297418904285e-12	2.81625195942115e-11	1.64525463210037	0.00597564249562769	0.012112478581348	-0.327983442889768	0.716987203837416	0.898602670763419	0.290248406577674	0.713969710649739	0.882581376102026	-0.445552771777958	0.642209613036044	0.823156940392214	3.20942744456923	1.98826904732708e-05	7.95661343515667e-05	3.69906921285822
AL021155.3	3.40025280762008	2.34555110948368e-08	1.68001209641669e-07	3.96530041718381	4.40625914738329e-11	2.74493205069378e-10	2.25651241555086	0.000317374160567825	0.00106824876889998	2.86881765007551	2.65960008733271e-06	1.12567009383625e-05	4.31268470617107	8.00294584132718e-17	4.62188092324682e-16	4.38749773660633	1.56858406891729e-13	1.01643827415588e-12	4.60125594004007	1.42322078533304e-14	1.03000387565702e-13	4.24422883216223	3.26321982140777e-12	2.01161886607567e-11	3.89798215074635	2.51029308585052e-10	1.25268027145913e-09	4.60080876643695	2.04986296618186e-14	1.46533560734765e-13	3.64834286333486	2.53634974430756e-09	1.10992261788845e-08	0.5059468206325	0.404208661293121	0.563954596690122	0.171087276121374	0.830493895886033	0.994519042182963	0.179997087844673	0.817551337442898	0.963676240167663	-0.888148630028851	0.356835886574536	0.520289207044921	2.18312383306135	0.00454256969337354	0.0122720826197247	2.92604666120252
NPPA	4.2821897079185	4.62124724553257e-16	7.15717561105646e-15	4.29336626385577	3.43168031891001e-16	3.22581951159413e-15	3.17062773561111	2.60060991990604e-09	1.70381429662415e-08	3.23730469099755	1.06975705377205e-09	6.62917729465989e-09	4.48551903947773	4.66076011616464e-24	3.77057016521941e-23	4.54785239605172	3.22428407914651e-18	2.86601054319284e-17	5.0151366882623	1.02132390575393e-21	1.18107820447131e-20	4.37251022847848	1.66658089987321e-16	1.40989013413024e-15	4.16307675901724	5.63074320900987e-15	4.00631747196865e-14	4.75872745526917	1.50501423357686e-19	1.51841856795109e-18	4.01347601596457	3.93004384115887e-14	2.46062659498289e-13	1.0844304072031	0.0325058906791761	0.0590280867456994	0.643180202310839	0.332401740312914	0.496046276736633	0.887364989154713	0.185157281359147	0.291278047836094	0.971425608360749	0.13995751911997	0.233539142609138	2.98299068042612	5.27474152138545e-06	2.29199673669105e-05	3.63721370600191
AL021155.1	3.90031388349806	6.8421687351305e-09	5.24085494634927e-08	3.81496280053056	1.47085161963791e-08	7.21670609562276e-08	2.7036510176779	9.19060875277203e-05	0.00033750819066679	2.69474509890757	8.94742519954867e-05	0.000310038538092957	3.99013345622114	9.92056191106961e-12	4.35054863400325e-11	3.76914820383741	1.64761124753216e-08	7.15246332916388e-08	4.36177627002539	7.09074770332121e-11	3.84573089643185e-10	4.03816610639159	4.21806037030931e-09	2.01322382134161e-08	3.86922710240903	2.19807906595936e-08	9.29050293832518e-08	4.48921889936093	2.71554566963857e-11	1.52489575364619e-10	2.93618924839128	2.98036263538348e-05	8.97634529365574e-05	0.349830308294187	0.617153749742443	0.793437031595805	-0.177367833548633	0.853121382998761	0.999999999999876	0.600265284681674	0.474809639662698	0.642429650152945	-0.270782749833991	0.777642981268787	0.952753768748606	3.28771377810087	0.000288727064850037	0.000965564627420971	4.13946266605878
NPPB	-1.22403600671793	0.133191034010543	0.259809418300133	0.0283443954782613	0.968697832059511	0.999999999999901	0.791430731557263	0.252546495510328	0.41580825404048	1.64810212440654	0.0132003617838147	0.0309778565590954	-1.71293757557363	0.00636926262235365	0.0133741278975084	-0.969542873931731	0.216147876707917	0.337020411294226	-0.269430283033882	0.725444072910195	0.893856342211591	-1.7129375013578	0.0484575024085256	0.0942060430836592	-1.24027762335092	0.137867207483243	0.231503795808395	-1.71293750135781	0.0484575024085252	0.0915228725018595	-1.7129375013578	0.0484575024085254	0.0902871413607426	-1.29608031698079	0.0552726502512265	0.0962732965788636	11.3426601547332	1.32482952242097e-57	1.52841266497796e-55	-1.70513363078592	0.0763442120938673	0.133468343513056	-1.71293744569597	0.0903383597074859	0.158554476705963	3.53082488168667	0.000129289140278444	0.000458191246104947	6.346639463644
SBF1P2	-0.282275728942607	0.120594321652855	0.239550629601175	0.151964198539461	0.393113487240936	0.5804132319478	0.520410819845931	0.00294827690792263	0.00832045383555629	0.281561797236892	0.110515489526495	0.204851821367696	0.415514185586927	0.00312019905325778	0.00682561982630139	0.894502366597075	2.18827766535035e-07	8.57252636102954e-07	0.801345032499425	4.61971241510895e-06	1.59336433979369e-05	0.982483190020001	2.18597231713378e-08	9.78549314239427e-08	0.873016260470247	7.39203811971844e-07	2.7078534677095e-06	0.744161970596833	2.27445969179107e-05	7.3402099105783e-05	0.68339059263283	0.000106876231631918	0.000300839333880173	-0.271153932234926	0.0770796514317294	0.130430204691325	0.423517300507745	0.0338935651362181	0.0681973727817029	1.28287164432165	1.26485027156615e-10	6.57541829259213e-10	1.13857720210087	1.4007363676871e-08	6.19739673000181e-08	-2.044862576216	4.18648158547234e-23	9.03411743503686e-22	-1.50625302058767
AL021155.4	0.103263155874235	0.84449461431931	0.999999999999893	0.181376394419624	0.7289323507213	0.919443144757274	1.5964476732006	0.00132544176588354	0.0039795266443171	0.265784788838992	0.605330619261452	0.819938901364645	1.43202694999738	0.000415133013956335	0.00100570781690033	0.944516348314206	0.0589661813758683	0.107466320989182	0.584850860990342	0.254407305183882	0.390432886220175	1.04015044519074	0.0488907580303459	0.0949796240241735	1.57626419762738	0.00219930348576938	0.0052934117373529	1.53616346370127	0.00258611564064949	0.00624797179405483	0.958377234638399	0.0642076421927188	0.116601579599369	-0.832780042857953	0.0785947399483417	0.132741161150622	4.97116909208763	5.20807935828985e-20	8.11844835887805e-19	4.06335995867623	1.31240974207428e-13	8.64417624953353e-13	4.75833462909749	2.78601613042259e-18	2.6890638076733e-17	0.163043061066786	0.808397077659834	0.983041646477476	0.269098805177999
RNU5E-1	0.60157344218348	0.447796306348017	0.672534469126328	0.419847452754082	0.603525256313927	0.806785144079854	1.76235476456391	0.019830066540887	0.0463008676383708	0.651632947726532	0.408451659883005	0.610192468916634	0.952735532910947	0.137893387549128	0.228053562846808	0.373497441871248	0.641690755690273	0.817845468857185	0.353456825885878	0.659521612796546	0.835085052282896	0.0266176941832211	0.975679182350381	0.999999999999901	0.834176394131203	0.311412933007521	0.464176350272199	0.718214025130654	0.38019388456089	0.54874170511497	-0.085734103040539	0.92031430681835	0.999999999999901	-0.674092502906797	0.366003946966776	0.51959736224469	5.95287020834138	4.70575461067622e-14	4.47647723539271e-13	4.25395206284538	1.46089721007077e-07	5.70983774089327e-07	5.82332649162386	2.38365018419235e-13	1.5893968257537e-12	2.09282661587571	0.0421698293334239	0.0909619721550274	1.27308388575915
RNU5E-4P	1.37025066555201	0.0794988667964537	0.169386015826075	1.23036896973464	0.119302160611296	0.212936440677818	2.03251253692355	0.00700045633052677	0.0182464578538373	1.20334227501435	0.124407711980483	0.227097998076703	0.122530421248619	0.862916236627482	0.999999999999831	0.354823743748856	0.673310185315928	0.846854747641377	0.255161980155872	0.766932873863919	0.927403094917058	2.28015322602029e-12	0.999999999997996	0.999999999999901	2.27915342857251e-12	0.999999999997997	0.999999999999893	2.28029520894518e-12	0.999999999997996	0.999999999999893	2.28147000559032e-12	0.999999999997994	0.999999999999901	-2.28877758034412e-12	0.999999999997619	0.999999999999938	5.34692347782962	7.99860778736678e-13	6.77987430960632e-12	0.290812320996607	0.750399282617241	0.909361495208832	3.80717812909642	1.75455905453344e-06	6.28937640321925e-06	0.314066696503797	0.767248466709582	0.958900916480968	0.265579634436068
KIAA2013	0.1561152789331	0.415596942299431	0.637595088125957	0.327240906802187	0.0875960521689784	0.162290907849537	0.540007541633444	0.00473374831416407	0.0128039434903898	0.325977545365028	0.0886486404616487	0.169046425870278	0.779177244892553	2.36038364011472e-07	7.67233156550157e-07	0.705752188231815	0.000217030949110642	0.000602112761030574	0.626156388609031	0.00105919114634951	0.00269650299049338	0.78358123526903	4.19084588700407e-05	0.000132334870482439	0.977642713575488	3.17536621858323e-07	1.2038103857722e-06	1.16624206549425	1.0195978132258e-09	5.02553687919437e-09	1.28942470366714	1.45949463280228e-11	7.62667536702436e-11	1.76441483022244	9.40564612763947e-28	8.14705581974394e-27	1.23197624556574	1.24207371515237e-08	6.77940137704569e-08	1.80775757024411	6.33183802549999e-17	5.31584903492973e-16	1.83487271960765	2.15200080792729e-17	1.94513977721939e-16	-0.666007981365571	0.00354833251659074	0.00978645314919116	-0.164406010431328
PLOD1	-0.266582211793375	0.125685929031991	0.247830448726172	-0.337146880668341	0.0527411049436219	0.103310203257251	0.271223039244926	0.118327890853635	0.220639268158259	-0.110141035819244	0.52642567552346	0.74077231795719	0.523033051327124	0.000131303923888071	0.000335448326915493	0.787734530811178	5.53699731996978e-06	1.86779059525034e-05	0.697353666320122	5.87712682764753e-05	0.000178051140498399	0.792710241507156	4.9648120102005e-06	1.7476557369337e-05	0.885744868103824	3.35325886059367e-07	1.26830097355547e-06	0.828145106252949	1.82280278323349e-06	6.64739713360614e-06	0.857459862724923	7.76818185400487e-07	2.73944930249893e-06	1.7615402979296	3.27633131153702e-33	3.4297865978525e-32	1.66730572811603	2.15338261571317e-17	2.72038453368444e-16	0.82221224424289	2.9477915228384e-05	8.93447400802697e-05	1.2687857327732	1.1036622732497e-10	5.90402308839766e-10	-0.852404559217841	4.33129235038242e-05	0.000165130957832942	-0.119729931047626
AL096840.2	0.511766993075987	0.559014403649405	0.78447352678729	0.165791986520507	0.857515963513095	0.999999999999901	0.614091195833862	0.488122430174389	0.697970008601412	1.86052528365687e-07	0.999999843626891	0.999999999999901	0.474668693168756	0.516477214703678	0.706975487342931	1.51105661316319	0.0640534242190994	0.115778203787105	0.672400122876155	0.43639791864807	0.609196482707004	1.11828987425666	0.201750182665594	0.330665500646568	1.86052527404659e-07	0.999999843626892	0.999999999999893	0.764377665304097	0.396146642320783	0.567105462414972	0.410525168622713	0.655739780304539	0.841850908799901	0.784645948038492	0.305643926383546	0.446163490290274	1.03574696665927	0.265598572486532	0.411839608785528	0.0344300393976924	0.972329542767836	0.999999999999913	5.58157412432373e-07	0.999999586275667	0.999999999999922	-3.72104886309085e-07	0.999999738337787	0.999999999999823	-3.7210488694977e-07
MFN2	0.385102157460085	0.00922535166133639	0.0258314783535011	0.0893541425865156	0.545832699208228	0.749909544684587	0.720037806114623	1.09238867551607e-06	5.27835145922181e-06	0.548354938399146	0.000206638871590754	0.00067855149925053	0.0244296490654474	0.833864803747768	0.9946143773371	0.184921900834444	0.210439150062763	0.329254876151827	0.097465078190895	0.509821796240151	0.688198960500205	-0.0110240389817191	0.940613244243506	0.999999999999901	-0.059339028108912	0.688498275210705	0.854418690261877	0.336799636984584	0.0226893334045588	0.0460187222855793	-0.340666772283937	0.0213819713271586	0.0428073048178397	0.374078988026401	0.00277529222043391	0.00586780703832744	0.144839824626999	0.38755224533395	0.561537763026439	0.927212310493291	3.08546006495514e-08	1.28250424260372e-07	0.771881219987203	4.06286800401116e-06	1.39542013564841e-05	-0.952738110074942	7.46992418260828e-08	4.10060207569863e-07	-0.614264883708724
AL096840.1	0.752074908624639	0.0272477905561012	0.067173105918196	-0.00826901382220533	0.981677295025373	0.999999999999901	0.470092453132799	0.169433102878689	0.298973159532336	0.152982326775929	0.658330105253258	0.869456360943598	1.59679080387677	3.08375449117933e-09	1.1471056995701e-08	0.593811947215653	0.0730074968134185	0.130072930204792	0.732177473491845	0.0315003979439855	0.0617060318192439	1.20252535431278	0.000651245553494124	0.00176268471123384	1.18932620800359	0.000762135134632333	0.00196662172810158	1.07384629072391	0.00207860137916743	0.00510539170901268	0.843154403103037	0.01615682948363	0.0330550800461696	0.733960034602646	0.0143525547184324	0.0275215616488614	0.967002500678654	0.010735761077562	0.024209597735171	0.651114656579503	0.116396874012689	0.194267009252421	0.384280453686977	0.386744231482663	0.557259072259635	-1.24445319086348	0.0554822690587457	0.11575530866693	-1.05355389488564
MIIP	-1.22927288637978	2.10672366136668e-09	1.71164956298551e-08	-1.09662232412283	8.87376011070473e-08	4.01543870753153e-07	-1.12965992233235	3.40677925220433e-08	1.9677920217214e-07	-1.22032828534553	2.63844843087702e-09	1.57373200920856e-08	-0.968628435204744	1.82799772052462e-09	6.90253166114205e-09	-0.636873668813648	0.00180330918694307	0.00438393181726793	-0.669867014489825	0.0010558743298647	0.00268876652761344	-0.384855915977296	0.0598373942891937	0.113804917588707	-0.670307643875223	0.00106209577211308	0.00268505314355396	-0.217975176382024	0.285963936048437	0.433701870131638	-1.37064281253883	2.44967912585234e-11	1.2586120908641e-10	-0.612679405525865	0.000396622126346354	0.00092466047739539	-1.16143092596425	5.81930797050064e-07	2.59737967281198e-06	0.0455305710857406	0.844247887799118	0.986365425159102	-1.09711659584146	2.55417150105866e-06	8.97365240785132e-06	-0.321979756162518	0.188800597762	0.330726612641238	-0.0162730985711134
MIR6729	-0.809652750683054	0.209982395145287	0.37703126043325	-0.933058193271451	0.152682870549927	0.263437312637737	0.159980759936863	0.787530252065572	0.963819482391801	-0.90382161471763	0.157545313853864	0.277690550468334	0.176321915840192	0.714481042615798	0.90002212121653	1.34323165623189	0.0153528859520574	0.0316985424968574	0.848212022199297	0.144216859365843	0.239394740678217	0.959276442970638	0.116266492995326	0.205561369359023	0.580427169938029	0.355080941737733	0.516361125661586	1.11337992162941	0.0594492558892811	0.109910156573071	0.547382915913454	0.36723921178526	0.535703458631777	-1.3279985971559	0.021151425475996	0.0395844761901299	0.565163230335322	0.390308352150351	0.564900317292221	-1.01687509160208	0.162787467701755	0.260914431100656	-2.18115260482129	0.00872822875810048	0.0190104677089681	-0.714848225144947	0.311304384816546	0.497062102000378	-0.556689590348672
TNFRSF8	-3.40510528690548	1.50473455663887e-11	1.53055870482235e-10	-2.0824476004791	2.8952872164703e-05	9.8580790119179e-05	-1.84438860864637	0.000204590001728933	0.000711179476905558	-4.55008944690835	5.04194958787108e-19	6.85096144421595e-18	-0.700281596127485	0.0724700927209257	0.127630162583351	-0.644437979675168	0.192648993157374	0.305161102429814	-1.08582402164639	0.0285829408829998	0.0565266802671033	-0.653509896064844	0.187445996740859	0.310886827139325	-0.203120885440011	0.681748073417287	0.848516157985203	-0.651817262702097	0.188334620244484	0.304221949064346	-0.886392200216816	0.073918101363491	0.132439078448185	-3.87976697504557	1.53128823464799e-19	9.51040725804682e-19	-2.38037216233036	2.64166435763733e-05	9.36968506596401e-05	-1.65354207555122	0.00356632318613797	0.0081040038478819	-1.66035104649193	0.00346574056930382	0.00808298175472953	-5.95004235321967	2.18254250773489e-22	4.4228554456402e-21	-6.36384659457156
RPL23AP89	-1.0036424096701	0.128620601559589	0.252436901939102	-0.951849783538331	0.147845156899074	0.256232803363509	-1.03488464878653	0.114536532706445	0.214637291048293	-1.90730957117501	0.00916466650873692	0.0222698134587676	-0.555859346207706	0.262486345783016	0.402289474262897	-0.239833329529668	0.691862605756341	0.863698929733709	-0.0126488600778205	0.983563964831754	0.999999999999901	-0.686274970766546	0.317957601502983	0.485221877011287	0.185849509972871	0.775080888683436	0.927344695897761	-0.371508140286457	0.574448700566097	0.760836485872445	-1.2690469692424	0.0742857065143394	0.133005977022547	-1.48338428830211	0.0107275256657442	0.0209876101853163	-2.13605625374811	0.0210417667877308	0.0444348630584753	-2.13605625374811	0.0210417667877308	0.0416962272144905	-1.93351859822296	0.0202027328954623	0.0411533030772088	1.17786463961577	0.208396882879411	0.358877374651733	0.629406701013968
MIR7846	1.50953879420767	0.107415557956504	0.218010300748374	6.96534529393008	1.57267519505447e-15	1.4067125963456e-14	7.14113016147576	2.87594191683744e-16	3.61017455024316e-15	5.35343632659091	1.03101583690918e-09	6.40140278254498e-09	6.55235848469821	2.34227531005597e-18	1.46166363594884e-17	8.00617734303022	4.29164393149237e-20	4.33945844268563e-19	8.25086242251228	3.17411984320273e-21	3.54517892346446e-20	7.75996608104611	6.3219620939985e-19	6.27564687816519e-18	8.10497661257141	1.61833996950579e-20	1.6546650463105e-19	8.00903552446486	4.43962964262313e-20	4.63560533661779e-19	8.74421883169919	1.18755323264053e-23	1.33222431638498e-22	5.1747656120689	4.80603033035314e-11	1.9122178655909e-10	-0.0423567100437169	0.97174324858456	0.999999999999876	1.47194874113465	0.165561303752704	0.26469668690686	-0.0196124535213742	0.986452144636898	0.999999999999922	2.1964041053885	0.0299103631692219	0.0670944925930542	-0.723750730780152
TNFRSF1B	5.8519730959359	4.7567945778706e-36	2.7368660837378e-34	6.2110047393732	2.11918896180985e-40	8.15525279631087e-39	6.77173743745409	1.05010850653164e-47	7.72647593816744e-46	5.40866250101056	4.87647655031157e-31	1.35724856253292e-29	8.22266332671023	1.53897057634499e-109	1.48820258213704e-107	8.01683537923086	3.74421788435115e-66	2.9546337964065e-64	8.00236112922314	6.46881137272761e-66	5.45149499186329e-64	7.10693493152328	2.29818052320798e-52	1.19537512310903e-50	7.77021954022825	3.00626157393632e-62	2.05806924591348e-60	7.72704532143913	1.3962919491586e-61	9.87374892251569e-60	8.26035997241981	4.07447678928278e-70	3.38650628398584e-68	7.73527875467465	7.17995133471549e-85	3.18420153500876e-83	6.97724368597884	6.79412904402363e-40	3.46521107314825e-38	8.7353804263129	1.53950381908074e-61	1.28996968063848e-59	8.70913913667987	3.50612144278788e-61	3.17408193482316e-59	2.58707340148466	6.60642285154495e-06	2.83311480924584e-05	-0.197371654244051
MIR4632	4.6306675561723	1.42989984157821e-12	1.6083935471789e-11	5.86697355437203	1.11331928032028e-19	1.34636483867332e-18	6.57147197573973	1.72279971848477e-24	3.83144492947575e-23	4.97163489411919	1.86914124307217e-14	1.78793690629089e-13	8.19331041612972	1.39739428276914e-45	2.5912504994076e-44	7.99475201383032	1.06285947011496e-35	2.5067626108177e-34	8.07790841054359	2.42390938444231e-36	6.18416501337699e-35	7.25406314565652	1.80595280306029e-29	3.39523338291626e-28	7.90825851592615	7.84848908943724e-35	1.74876924112145e-33	7.68207154579728	5.73529728019714e-33	1.22921160446766e-31	8.49521480437287	4.89919040036799e-40	1.23883187264506e-38	7.78187859165579	4.3626175811679e-39	5.55148567878969e-38	6.88416880711944	1.40382700978308e-23	2.8325985154372e-22	9.11784514850285	2.04199500441044e-40	6.78259315672778e-39	9.07863997857853	4.48941939096405e-40	1.58470077929306e-38	2.35447678748389	0.00497801327163761	0.0133496624313647	-0.450951165736967
RPL10P17	-0.0775969218595785	0.927890440704822	0.999999999999893	-0.0890462671020369	0.917297479186884	0.999999999999901	0.245193454249933	0.764260293871771	0.946523780226549	0.881594096438484	0.249178467735956	0.408745973745852	1.5505437128642	0.0129740183531919	0.0260527507578231	0.516813325718408	0.519042164317495	0.696795343560907	-0.121108751214273	0.887731917460894	0.999999999999901	1.04574252939442	0.200840638494756	0.329409609979104	1.22217053374361	0.124844287296565	0.212391759671104	2.00013549658735	0.00839728364099143	0.0185694718107538	1.49065362525338	0.053774992905796	0.0993566988209797	0.251899166207693	0.722561410360213	0.890298880622405	-0.13836448938082	0.885734598131109	0.999999999999876	-0.20575407602469	0.825212168733669	0.970210737751693	-0.255279371988554	0.801163938077885	0.968231513174298	-2.69688384699973e-07	0.99999980499219	0.999999999999823	0.265940114925354
SNORA70	0.474398549435106	0.132699576355599	0.25900049121186	-0.411782458485179	0.194786029630088	0.325010679565943	-0.316043871129804	0.317609749576196	0.50098279429428	-0.101946319809433	0.746941440349555	0.942320184133862	0.137970067520002	0.57983228918176	0.774345268103741	0.0285146175360038	0.927699659839988	0.999999999999901	0.272322436646026	0.388115227926242	0.554320999157817	0.0792135934018778	0.802800407588901	0.970143249051886	-0.0805260503139445	0.800204563422786	0.948514791658983	0.455792857018435	0.1483761673109	0.247487465228283	0.364295934075735	0.248796520212368	0.386089348727104	-2.92022510697058	5.04638329366679e-24	3.79760963285362e-23	0.802596816231525	0.0242548831119673	0.0505311727720565	-0.951855612104933	0.0106711204972362	0.0223778188597837	-1.24395382498308	0.00102861869840471	0.00259823882483784	-0.375881875208612	0.325433831842612	0.514901646637976	-0.426374452595491
VPS13D	0.214276983473939	0.388520234965969	0.606675162443803	0.596845268208309	0.0162095923753558	0.035764320888106	1.04609443647148	2.45944005476079e-05	9.889892727227e-05	0.683782265767674	0.00586200993985329	0.014827650907076	1.02811102300464	1.43072155396597e-07	4.72085670499229e-07	1.18858847362224	1.61307397714468e-06	5.76201650394474e-06	1.19558787908708	1.42578102086975e-06	5.19503655638237e-06	0.650852355192439	0.00874429276595921	0.0197013355364576	0.949194284283015	0.000130720227869758	0.000373394896528013	0.456293291230323	0.0660357448862935	0.121040335306889	0.951348296951288	0.000125600719492081	0.000350567399687869	0.0743952893683122	0.723343686208845	0.890872630993948	1.30945060001496	3.16914512612005e-06	1.28331753464041e-05	1.39593219369244	6.85973744693773e-07	2.50259112452287e-06	1.30342848403389	3.55415162155601e-06	1.22786465687527e-05	0.821227370216008	0.00585785459463158	0.0154784067509432	1.12368529722952
SNORA59A	0.172980247706293	0.761348015726091	0.956865670316706	-0.0275676450425423	0.961790714706264	0.999999999999901	0.311918369861527	0.577838845541196	0.789008938330802	-0.171491589563559	0.765976197317558	0.957777144001505	0.527596379393993	0.245841582182599	0.379966990555119	1.19152615525739	0.0234330204274532	0.0466164458437734	0.852511274224258	0.11974239172968	0.20369201984504	0.918560448417455	0.11728041514024	0.207075948219353	0.107740264834516	0.85872207545777	0.996302369661509	0.649197472839286	0.265808932761052	0.407954271129827	1.36624831487503	0.0124255164120611	0.025973791340073	-0.0639613383066931	0.899117673904302	0.999999999999938	2.15743190625945	0.000196373846505155	0.000610156431294484	2.69710809700425	4.2301875870592e-06	1.41360224458368e-05	2.13139993654594	0.00046081160781437	0.00122596627041983	0.653167201583025	0.375592988755127	0.577178373070884	1.34687399899791
LINC02766	2.84453776322625	0.00040829263979294	0.00153805750846679	2.71936657687711	0.000798714755067818	0.00222764234587728	2.89800714150991	0.000308978758372219	0.0010423674910176	2.53404043394957	0.00171800041661647	0.00480708203106133	2.87675177780843	4.4049634693518e-05	0.000117933351176703	3.49733346526004	8.86024907483552e-06	2.92857416123689e-05	3.8489817363595	1.19457243898702e-06	4.38929377828478e-06	3.51010685531274	1.8017350170475e-05	5.9605613445246e-05	4.0121574185289	6.18620774508878e-07	2.28063603570404e-06	3.60897153119922	7.97167748113228e-06	2.71354132144012e-05	3.48055962886149	1.58672364244333e-05	4.9226900176957e-05	3.34288236013818	4.66157411238254e-06	1.3047255180753e-05	1.61897720609502	0.080214160511098	0.147086400189901	3.11870526455649	0.000346190440390527	0.000912861776899004	3.80780898804653	1.57699203301538e-05	5.05424140902614e-05	-1.13956425908199e-06	0.99999921423209	0.999999999999823	0.266876766131735
DHRS3	0.0608967076640811	0.909301761349797	0.999999999999893	-1.59875772116709	0.00288774523554501	0.00736406243233797	-0.904585901376606	0.0908882262997811	0.175954391218146	-2.18255260990753	4.86888678443554e-05	0.000174551738252057	2.48035800292734	3.57369806161173e-09	1.32388600619872e-08	0.12668952375589	0.812443182513026	0.962016891895197	0.369361762074428	0.489334625056036	0.666889722709067	-1.00651327191335	0.0604711043519186	0.114843105131929	0.526159443572091	0.324795171015664	0.480559716007859	-0.0157043836650978	0.976561482474037	0.999999999999893	3.23179524717205	1.38436276589614e-09	6.18507251082425e-09	2.85701404155269	2.42343082266665e-10	9.20689201446066e-10	3.27171451585504	6.31201698387023e-08	3.16607321149937e-07	3.01968803032745	5.96530475999112e-07	2.19296731780932e-06	3.13463122558772	2.18836445996477e-07	8.65038754430196e-07	4.25065313358767	3.16730377019374e-11	2.46440336341034e-10	3.64413936701792
RNU6ATAC18P	-0.18282078406573	0.834623878446306	0.997574154150152	-0.543366638913419	0.556323271597592	0.760782392430057	-0.265761893147601	0.761630063444277	0.944567840717553	-0.197842851358782	0.82145303840444	0.995868470132026	2.70726654810777	1.70561003070616e-05	4.75647506084784e-05	1.23730383913553	0.111698370390136	0.189707167344167	0.872067813273786	0.270070801350282	0.410757266898828	-0.543366638913416	0.556323271597594	0.760305851588937	-0.543366638913413	0.556323271597597	0.740922588825298	0.459335466813905	0.588847287456954	0.77612040842669	2.40815981973792	0.00164902283778877	0.00397291471921289	-0.314503468982979	0.676026088194934	0.848336610488878	-0.118734011742285	0.903367146324147	0.999999999999876	-0.512659760782714	0.612948484485757	0.790461611262612	-0.468730006072471	0.630814432265951	0.811887054382556	3.10470146357229	0.00296209838660442	0.00830044738020009	1.94225344955391
MIR6730	0.171901466146372	0.78908230766258	0.975600920645817	-0.977306182110765	0.140113783696528	0.24463266336239	-0.0667973294970173	0.91729427077548	0.999999999999893	-1.43516306602507	0.0313054907940424	0.0673393991846337	3.0848933212674	6.15682391586612e-10	2.40118557619888e-09	0.990451220213834	0.116546387518888	0.196929523663936	1.19765899867294	0.0592466589286436	0.108937913651941	0.442342673695523	0.498222468939414	0.694959932235827	1.7319719047538	0.00643607021993492	0.0143751784471637	1.16251741341297	0.0688180862372196	0.125536201567389	4.10377110816953	5.48018826985418e-11	2.74508798982765e-10	3.29236676347276	6.71306709410124e-10	2.48258485613619e-09	2.68137679201087	0.000157273160700828	0.000496618024618375	3.5876936819392	4.26627265167833e-07	1.59325253657767e-06	3.74069159166536	1.33209115672932e-07	5.37057586179653e-07	3.10404357369426	3.51250203793972e-05	0.000135766351989329	2.62482554404488
AC254633.1	1.37629583442263	0.066978008051005	0.146291217751206	1.87629128293992	0.0115396171642957	0.0262969756012851	0.724063775823547	0.342955957017946	0.53256880705009	-0.0018018891516376	0.998159321541904	0.999999999999901	3.03679892281399	3.25134508565303e-07	1.04503600711352e-06	0.284027494541532	0.711983455898918	0.881614996112625	0.22144034848405	0.776398051275216	0.934990612784705	-0.466422836784284	0.580672592921863	0.783970396533793	-0.136991586938995	0.86817039196931	0.999999999999893	-1.56524017241566	0.0824167248066552	0.147483381812023	2.51495185921602	0.000695705421412679	0.00176899486700986	-0.288451312357436	0.673868806176409	0.846279497064333	3.5627702866677	1.27972786884129e-05	4.7482122817096e-05	3.37948602630369	4.43436399630924e-05	0.000131492109500591	4.47612467715122	4.42694324627542e-08	1.86875684455759e-07	6.03231469340745	1.45485013236506e-09	9.64529904596889e-09	5.17522837283469
AADACL3	-1.56697145359982	0.0366967484971488	0.0870876953788107	-1.56697145359982	0.0366967484971485	0.074780175880553	-1.56697145359982	0.0366967484971489	0.0798859075883599	-1.56697145359982	0.0366967484971487	0.0775742610257647	-1.56697145360186	0.00304891470739173	0.00667912110427291	-1.56697145359982	0.0366967484971488	0.0700719146983215	-1.56697145359982	0.0366967484971487	0.0708324414449773	-1.56697145359982	0.0366967484971488	0.0733859115735491	-1.56697145359982	0.0366967484971489	0.0709875223702782	-1.56697145359982	0.0366967484971488	0.0713028797153477	-1.56697145359982	0.0366967484971487	0.0702632922360899	-1.56697145360136	0.00812095678551282	0.01614690551818	-1.56697145359829	0.0750347338972161	0.138663399728469	0.486260005322648	0.434913806534824	0.596507525991069	1.58939591961146	0.00851855363821236	0.0185913205650757	-2.54669221947594	0.000853422810004738	0.00264521871891036	-3.09314845638434
C1orf158	-0.0490822354934847	0.96480589490954	0.999999999999893	-0.0490822354934859	0.964805894909539	0.999999999999901	-0.0490822354934959	0.964805894909532	0.999999999999893	-0.0490822354934889	0.964805894909537	0.999999999999901	0.0442189557363379	0.959273794052654	0.999999999999831	-0.0490822354934909	0.964805894909536	0.999999999999901	0.0818849642258843	0.940175067932461	0.999999999999901	-0.0490822354934877	0.964805894909538	0.999999999999901	-0.0490822354934855	0.964805894909539	0.999999999999893	-0.0490822354934886	0.964805894909537	0.999999999999893	0.233353103811002	0.830342783918074	0.979519374883407	4.7089420887342	2.54046355684384e-08	8.43037067880443e-08	0.998334578104755	0.381948806201372	0.555206167781814	2.48260964260787	0.0227408409366022	0.0447310250786322	3.72193348823683	0.000542293022527797	0.00142654608003845	-8.8957801734417e-12	0.999999999994716	0.999999999999823	-8.89823538752038e-12
PRAMEF1	3.49518214947381e-13	0.999999999999674	0.999999999999893	3.50533622964876e-13	0.999999999999673	0.999999999999901	3.50520654381284e-13	0.999999999999673	0.999999999999893	3.47479487618147e-13	0.999999999999676	0.999999999999901	-5.80254924275677e-13	0.999999999999312	0.999999999999831	3.48438152812507e-13	0.999999999999675	0.999999999999901	3.49112387182192e-13	0.999999999999674	0.999999999999901	0.439947901779206	0.593345098537577	0.793344189685028	3.48518152934386e-13	0.999999999999675	0.999999999999893	3.47562540932592e-13	0.999999999999676	0.999999999999893	3.49365567539192e-13	0.999999999999674	0.999999999999901	-3.49184757683185e-13	0.999999999999614	0.999999999999938	1.0446721778024e-12	0.99999999999914	0.999999999999876	1.33292411231391	0.0855319095269497	0.147700632641946	2.10432810946624	0.00630238753373266	0.014085305725476	-6.95998875393873e-13	0.999999999999456	0.999999999999823	-6.9544037944632e-13
HNRNPCL1	0.272498654522771	0.423208566617501	0.645853489526408	-0.264272167291751	0.444344108501551	0.64043434719461	-0.329307178131408	0.337888255015373	0.526238954901456	-0.490725389257377	0.153793594630359	0.272059153521826	-0.213803958035846	0.437816919934614	0.619565939431293	0.274033951716534	0.409168137921211	0.5754358162479	0.481377851866471	0.153436633058083	0.252515573467107	0.213734643221599	0.545239155386193	0.747835334549706	0.155349842139862	0.661720465803716	0.832162548404508	0.190809498487568	0.584047143794552	0.771257021929027	-0.356750868932498	0.317932570986296	0.475037907531123	-0.882097813095378	0.00428085068278862	0.0088422883719206	-1.67656187783679	0.000127567460919224	0.000408135289053382	-1.55812023070686	0.000744362016637386	0.00187022311050625	-0.870050826435931	0.0540592615216723	0.100522505723095	-0.584322018028895	0.266462454276016	0.440470568051378	-0.939301582123534
RNU6-1072P	2.83207860968724e-13	0.999999999999747	0.999999999999893	2.84307693701647e-13	0.999999999999746	0.999999999999901	2.83909214800494e-13	0.999999999999746	0.999999999999893	2.84397526423359e-13	0.999999999999746	0.999999999999901	-4.73391999427041e-13	0.999999999999462	0.999999999999831	2.83618521173378e-13	0.999999999999747	0.999999999999901	2.84665910726169e-13	0.999999999999746	0.999999999999901	2.84442318291923e-13	0.999999999999746	0.999999999999901	2.84074711035272e-13	0.999999999999746	0.999999999999893	2.83422748413079e-13	0.999999999999747	0.999999999999893	2.82806706170664e-13	0.999999999999747	0.999999999999901	-2.83352128136242e-13	0.9999999999997	0.999999999999938	8.51515803123133e-13	0.999999999999329	0.999999999999876	0.00797476831611666	0.993387684606227	0.999999999999913	8.52215478218346e-13	0.999999999999329	0.999999999999922	-5.69109041043891e-13	0.999999999999575	0.999999999999823	-5.68426096490771e-13
HNRNPCL3	0.0932286678921986	0.822932098852914	0.992426317875209	-0.956422234176692	0.0327005428324543	0.0675012101405783	-0.0571324551932052	0.890683400416326	0.999999999999893	-1.31196747520242	0.00364620348844867	0.00958627106618443	-0.637059858746958	0.06736248026434	0.119433617202068	0.295500216748595	0.461988151492789	0.634969536927424	0.0762557500175079	0.855409554669514	0.996711809372858	-0.119540143647625	0.793777954803711	0.962896431720538	-0.341749704430939	0.464692125686994	0.642113849380622	-0.363545249511374	0.425913723875471	0.600259169218773	-0.827410793000587	0.07710748632034	0.137508587493965	-1.29692627152086	0.00133674330276498	0.00293674147884593	-3.83019545062859	7.47566968109228e-07	3.29114018314151e-06	-3.61237920183937	2.28237408093071e-07	8.75597696198215e-07	-2.8718324781735	7.83453301229436e-06	2.5999463148913e-05	-0.597363137150642	0.300706310132856	0.483589145533167	-0.418288218014781
HNRNPCL2	0.427060546107145	0.41879509726019	0.641039754211189	-0.0829437804869672	0.877014417228616	0.999999999999901	0.267099450990624	0.612349199893353	0.820605950675546	-0.387954623994376	0.469354027909989	0.678684815661816	-0.0437840814778062	0.918317401860588	0.999999999999831	0.935773587123555	0.0693928782028209	0.124323766566854	0.860120343131425	0.100574914659842	0.174520584956794	0.450983426897149	0.410292754578879	0.594674535121049	0.200045575950515	0.718302884419162	0.880537126034234	-0.0689948428129456	0.901056903073723	0.999999999999893	-0.161175515135754	0.769930350977212	0.934342863144946	-1.04537348046732	0.0287688027406862	0.0526978990671087	-3.45357809769606	2.52467851331152e-05	8.98305943411376e-05	-2.87171635821262	7.30734849660708e-05	0.000211005647242405	-2.19159287216905	0.00212005177502828	0.00511350720278219	-0.425351288172694	0.549229616763357	0.772218820953983	-0.998628865802205
HNRNPCL4	0.0842373579481294	0.84673411313304	0.999999999999893	-1.25036903967156	0.00903640555879406	0.0210405798361273	-0.916442140762239	0.0473076594248112	0.0999406041256623	-1.61949679601786	0.000881953206610471	0.00259521397064106	-0.368137251705523	0.304224026226176	0.456977511679991	0.249737987502156	0.552881143016261	0.731828293549265	-0.0409695397541403	0.926004738698113	0.999999999999901	-0.713999658959742	0.158003134581791	0.2681596249079	-0.704053246522438	0.164734441994062	0.269986844649002	-0.776498987637372	0.119259117944857	0.204651540464316	-1.07018670806398	0.0317294303731849	0.0614569376847196	-1.66056660748798	0.000125215601631166	0.000308326981729485	-3.64558343546493	3.34871199604608e-06	1.35181625818388e-05	-3.51350857807095	5.7357070611238e-07	2.1132132248038e-06	-2.67199990271205	4.10020756495215e-05	0.000125152401023235	-0.661432304441529	0.272360693551374	0.44773501642384	-0.993180629925448
PRAMEF9	1.17102028401823e-12	0.99999999999897	0.999999999999893	1.17153177228717e-12	0.999999999998969	0.999999999999901	1.17099591591219e-12	0.99999999999897	0.999999999999893	1.17134520554096e-12	0.99999999999897	0.999999999999901	0.108124810173996	0.878822624409075	0.999999999999831	0.077003910026568	0.930315297340176	0.999999999999901	0.134544474074135	0.878492050827293	0.999999999999901	1.17168844621907e-12	0.999999999998969	0.999999999999901	1.16970155167586e-12	0.999999999998971	0.999999999999893	1.17111282318711e-12	0.99999999999897	0.999999999999893	1.17091002203496e-12	0.99999999999897	0.999999999999901	1.20242740021806	0.0981952528082236	0.162379494358745	1.05897519395958	0.226715452411446	0.360611500983954	3.6704418417998	2.20716567056549e-06	7.61196536256362e-06	3.30348443597855	3.99699068585916e-05	0.000122160283707634	-2.34138098679148e-12	0.999999999998277	0.999999999999823	-2.34160285741331e-12
RNU6-771P	2.24216006209845e-13	0.999999999999802	0.999999999999893	2.25133361959301e-13	0.999999999999801	0.999999999999901	2.2508138467057e-13	0.999999999999801	0.999999999999893	2.24361687243201e-13	0.999999999999802	0.999999999999901	-3.73814773516031e-13	0.999999999999581	0.999999999999831	2.24733931112176e-13	0.999999999999802	0.999999999999901	2.24309928999805e-13	0.999999999999802	0.999999999999901	2.24649694586324e-13	0.999999999999802	0.999999999999901	2.25112287170832e-13	0.999999999999801	0.999999999999893	2.24556825169184e-13	0.999999999999802	0.999999999999893	2.24887831691859e-13	0.999999999999802	0.999999999999901	-2.24913484436162e-13	0.999999999999765	0.999999999999938	6.73432910302806e-13	0.999999999999476	0.999999999999876	0.00794548204955067	0.993508299484979	0.999999999999913	6.73865335426207e-13	0.999999999999476	0.999999999999922	-4.49768671957676e-13	0.999999999999668	0.999999999999823	-4.49653316635751e-13
PRAMEF17	3.44449249292519e-13	0.999999999999685	0.999999999999893	3.42761131974109e-13	0.999999999999687	0.999999999999901	3.45433562648643e-13	0.999999999999684	0.999999999999893	3.45350068799509e-13	0.999999999999684	0.999999999999901	-5.73617705842088e-13	0.999999999999333	0.999999999999831	3.45431499895371e-13	0.999999999999684	0.999999999999901	3.4413073293643e-13	0.999999999999685	0.999999999999901	3.44560583589774e-13	0.999999999999685	0.999999999999901	3.43893290238209e-13	0.999999999999686	0.999999999999893	3.44342237856461e-13	0.999999999999685	0.999999999999893	3.44573696981579e-13	0.999999999999685	0.999999999999901	-3.4474872367416e-13	0.999999999999627	0.999999999999938	1.03433611891866e-12	0.999999999999166	0.999999999999876	0.724093711888747	0.382240665209428	0.538205083789863	1.34987588922718	0.0957977923878618	0.167015590977734	-6.8681494119942e-13	0.999999999999475	0.999999999999823	-6.86611189323309e-13
LRRC38	-1.93139496216918	0.00867351043198991	0.0244311635227136	-1.93139496216918	0.00867351043198993	0.0202746554618077	-1.93139496216918	0.0086735104319899	0.0221058925367383	-1.93139496216918	0.00867351043198993	0.0211900868750833	-1.82807310551313	0.000281823541158409	0.000695096410595496	-1.93139496216918	0.00867351043198996	0.0187833513957403	-1.93139496216918	0.00867351043198995	0.0189701912613216	-1.93139496216918	0.00867351043198997	0.019551876607794	-1.93139496216918	0.00867351043198998	0.018965449811411	-1.93139496216918	0.00867351043198997	0.0191283725792946	-1.93139496216918	0.00867351043198996	0.0186356809152816	-1.43317953952512	0.00803579623660408	0.0159860895065259	-1.93139496216812	0.0260209882050751	0.0538495063389954	-1.88030931685514	0.0142395249811001	0.0291656246379364	-1.85692115157661	0.0147105072742842	0.0307382050756299	-3.30278344341822	4.26286733525658e-05	0.00016267980636251	-3.30278344341822
BRWD1P1	0.523912831448551	0.136272156825741	0.26468529225864	0.692435853387643	0.0459725656813138	0.0913990760635482	0.950922440288612	0.00508730949776614	0.0136554857794056	1.21956183935607	0.00026592896726915	0.000858100322440836	0.843606035233465	0.00272149349315807	0.00600650222171574	0.56002024597116	0.0985873238137583	0.169768417459077	0.602802407011933	0.0846487513005344	0.149748173151724	1.0452714463161	0.00376438794549253	0.00906936637550105	1.18009938129839	0.000965978965366874	0.00245652481222261	0.482789248903764	0.193026086761373	0.310748185547916	0.404085368844213	0.270098952373006	0.414396162997222	1.61964639134122	2.47427051251901e-08	8.2155578821896e-08	2.08689581655158	1.53102465190337e-08	8.26831675413711e-08	2.15082475362021	1.9279674586083e-08	8.1712177859808e-08	2.24579556041551	4.83720228702825e-09	2.2382704497291e-08	-0.479390758845924	0.242783025531008	0.408096995836889	-0.897757999647503
PDPN	-9.07438867846287	5.84028966106776e-32	2.67582699049329e-30	-7.93124722661545	1.67090647390548e-26	3.06626551070674e-25	-6.69120225334098	4.25071899874135e-20	7.01821787289567e-19	-2.58896029498897	0.00032017055287854	0.00101865365393276	-8.11890753177382	5.15619024183627e-44	9.01441154885437e-43	-5.16174561504222	8.30385224809224e-13	5.11631951085168e-12	-4.08317725592788	1.48112373658717e-08	6.58575222997804e-08	-8.73045897410967	4.43339391264844e-28	7.74211421431564e-27	-2.72938550930392	0.000149617349070711	0.000424040002283145	-3.58076486012443	6.6739879107804e-07	2.54015926953133e-06	-6.94190626098644	5.08132200235437e-21	4.90029484090685e-20	1.56545527894304	0.00997552937369154	0.0195875105904696	0.884427157920668	0.277880498398402	0.428079319925948	-2.61754440490484	0.00135082311359211	0.00326852358726883	-3.96377026690795	1.34144356053633e-06	4.87022168514707e-06	-6.81527540284851	4.19455796408409e-15	4.66098175839661e-14	-5.04514509474398
PRDM2	1.15345090866954	1.11630208497865e-10	1.03984937069881e-09	0.674496356311905	0.000165027469116973	0.000508852228684048	0.663963544906735	0.000204432674231426	0.000710684886125249	0.877102215663544	9.35027594310904e-07	4.18719587294958e-06	0.829838690675631	4.07775233206253e-09	1.50532057644459e-08	0.702474525247791	8.27746576719522e-05	0.000243245156160947	0.66601848245504	0.000197027635426507	0.000556089492297474	0.495399547554175	0.00569845352588969	0.0133126288229432	0.550773324609171	0.00211985077817781	0.0051144282756415	0.135500170463485	0.44984960930837	0.625907098524285	0.480185763849565	0.00734695437995725	0.0159791293706859	-0.153681069746974	0.312316891116941	0.454594967464029	-0.680377942091071	0.000874601000919218	0.00242513234560935	0.161782367059698	0.42790073010871	0.5886505368264	0.351602406890842	0.0843549680249648	0.149399625016094	1.43721515136124	4.59380092332851e-11	3.51868613937521e-10	1.82826482970852
KAZN	-1.74699461362709	4.7558744636458e-06	2.49586981490097e-05	0.831087760878078	0.0275988074160952	0.0579392896076198	-0.188647963129444	0.617449745598006	0.825100388492263	1.74279807013458	3.73803991296349e-06	1.55157203286239e-05	-1.62839323003838	5.37847193087881e-08	1.82956732236167e-07	-2.30410932115842	1.36993856490998e-09	6.50069042577896e-09	-2.40187444467676	4.08957747431466e-10	2.08676298697282e-09	-2.1962071567247	1.27837777721253e-08	5.8443406310464e-08	-1.52572672998678	6.5414045304164e-05	0.000193982539328717	-1.54246133579034	5.20289073567481e-05	0.000160643800039918	0.481499233285177	0.202147116334624	0.322572489887668	1.94387023451638	1.07061799502666e-09	3.90483357166358e-09	-1.65340845994966	0.00013096835024581	0.000418194756040816	-2.00172586790124	5.57562272226355e-06	1.8394652868691e-05	-0.693037554972978	0.108859802187036	0.187017687500873	-1.03369349239199	0.0225054929758189	0.0522249936971291	-1.28704133544094
AL357873.1	6.57310534901982e-13	0.999999999999414	0.999999999999893	6.55470123947346e-13	0.999999999999416	0.999999999999901	6.52828323570293e-13	0.999999999999418	0.999999999999893	6.55790209975578e-13	0.999999999999415	0.999999999999901	-1.0881152238547e-12	0.999999999998767	0.999999999999831	6.55674480718522e-13	0.999999999999415	0.999999999999901	6.55632490002914e-13	0.999999999999415	0.999999999999901	6.55884475844911e-13	0.999999999999415	0.999999999999901	6.55926615645768e-13	0.999999999999415	0.999999999999893	6.57058265553611e-13	0.999999999999414	0.999999999999893	6.55584457668716e-13	0.999999999999416	0.999999999999901	1.99823786663225	0.00352066536850319	0.00734895183007924	1.96572264892341e-12	0.999999999998454	0.999999999999876	1.87953923599364	0.020108213512941	0.040022432268925	2.79269862954915	0.000528002818986992	0.00139157013312314	-1.31235095728123e-12	0.999999999999021	0.999999999999823	-1.31024455013728e-12
TBCAP2	-1.78440826192097	0.00928903479938711	0.0259882810245587	-1.50550728894558	0.0233973583630705	0.0498854203145631	-0.704406682103636	0.238933793293287	0.397272636177226	-1.56868171233548	0.0182383309503572	0.0415173074381943	-0.817326283716765	0.0818420599775214	0.142553464610275	-1.45069825035815	0.0250120845605301	0.0494385472335441	-1.16403692927512	0.0604782057709716	0.111008281390271	-0.000610605795754591	0.99921122182862	0.999999999999901	-1.52154453979303	0.0320125820649685	0.0626420190142054	-1.29245598042431	0.0577059013729722	0.107034737627325	-0.594461183039036	0.333933940944445	0.495047089344334	-0.366003577220362	0.468747732069414	0.637663111425934	-1.99140438200781	0.0234097385172008	0.0489597628403598	-1.65695143359999	0.02673355135223	0.0518136139650999	-1.99140438200781	0.023409738517201	0.0470292710131991	0.924889754699668	0.204775201390345	0.35367335239765	1.16750490484604
AL031293.1	1.00782330641484	0.170280495827774	0.317927003089781	4.1717134073195	8.19315500726892e-11	4.98023984878888e-10	2.06427605776271	0.0028172521184256	0.00797498282004375	3.4001374459079	1.60997305308424e-07	7.90571784558357e-07	0.0160041738926435	0.980701296881954	0.999999999999831	-0.087650650154906	0.918536201337489	0.999999999999901	-0.0876506501549067	0.918536201337489	0.999999999999901	-0.0876506501549057	0.91853620133749	0.999999999999901	-0.0876506501549062	0.918536201337489	0.999999999999893	-0.087650650154906	0.918536201337489	0.999999999999893	-0.0876506501549043	0.918536201337491	0.999999999999901	1.62781557791414	0.0122595557228211	0.0237600435916882	-0.0876506501528598	0.928429641360461	0.999999999999876	1.39834617931443	0.0709888799223398	0.125089909450387	0.117539394041992	0.894539545528229	0.999999999999922	-2.0450079889113e-12	0.999999999998437	0.999999999999823	-2.04519876303874e-12
TMEM51-AS1	-1.53982433958915	0.00219977518451015	0.00713574923710382	0.692151539311987	0.157257872217495	0.270385833965198	-0.40361787995131	0.412484245507875	0.614434779154957	0.491603555180377	0.314880234023001	0.495936624894821	2.3961455510555	4.63859688010706e-10	1.82546355719721e-09	2.00846478449676	3.58327190369621e-05	0.000110095027818532	1.81999780310309	0.000186790371862421	0.000529078970494256	2.64392073624542	5.46080498769092e-08	2.34888422256423e-07	3.10930096142095	1.59068603478919e-10	8.07254364260174e-10	2.27481627376421	2.9388043892176e-06	1.04881164678718e-05	4.56075426742769	5.64747755323643e-21	5.43220186284958e-20	1.99804700665661	1.29576024303928e-06	3.78963291961468e-06	0.543923065957868	0.327146914915837	0.489994755214629	2.09795375993374	0.000147280332167382	0.000409109400312388	2.78983124028946	4.16254825464422e-07	1.5937096951589e-06	0.320065637008988	0.586309751093085	0.801606764468425	-0.626018869213649
TMEM51	-0.543363174702386	0.286781128664627	0.481249073669792	0.31448793263595	0.536452627747924	0.74007024190196	-0.272757203546258	0.592029186771636	0.802274447631298	-0.58971249117334	0.247176372465364	0.406095257455662	2.88164520402117	5.70575795425855e-13	2.68253520153162e-12	2.80313258420971	3.27897828821495e-08	1.38382495843502e-07	2.56309505405203	4.39816215460856e-07	1.69510236558744e-06	3.24181553865025	1.66444187895242e-10	8.97892795924673e-10	3.45822282159391	9.34134296201216e-12	5.2399598325207e-11	3.33953283367253	4.62140045296453e-11	2.54905526852739e-10	4.11362286866273	5.07323228258954e-16	3.59729500448115e-15	3.07941935332292	7.28475291092038e-13	3.21071791773104e-12	1.67928985764898	0.0035204272570326	0.00874426477977798	2.49711886769841	1.42285662792925e-05	4.47248905936995e-05	3.08705840254593	7.96318160843692e-08	3.28571659943975e-07	0.585691584352841	0.337435709218524	0.530032600746148	-0.430373526062554
C1orf195	-0.512454331579474	0.451134776169268	0.676101906198295	-0.887887159457386	0.231083202001084	0.375443881583446	-0.624559453744526	0.38262531537154	0.579817529263616	-0.908663168522576	0.220451799198606	0.369172432411347	-0.158114639054151	0.762233260279271	0.938042091936632	1.50361324784756	0.00702413161833037	0.0154697832258921	1.3962584705289	0.0123721512417252	0.0263333511689169	-0.558126247954557	0.449900896190231	0.639920493146228	0.548565029685725	0.405366965242013	0.575007337231223	0.751331249439418	0.247619710097751	0.384106536381435	1.12937636031192	0.0643951764080242	0.116920196245978	0.593427857420493	0.269851522760092	0.399827401021228	1.67376164049463	0.00710793117188247	0.0166053914908972	2.17694048422802	0.000489425658585348	0.00126202215309855	1.07230960887162	0.116411859175599	0.198392473381276	-3.20515200387379e-07	0.999999752883153	0.999999999999823	-3.20515199106008e-07
MFFP1	0.280230109034471	0.501441684056531	0.727799187715965	-0.655362724851727	0.127113347997963	0.224705963408326	-0.585724434581173	0.168032354401424	0.296745338898612	-0.351290417635591	0.401843146758232	0.602833262153388	0.685683483008473	0.0368424413188317	0.0685625300558795	-0.171332275285892	0.678659293334993	0.851724368331818	-0.262195046594066	0.536310059161782	0.715630659057161	0.0510965166585637	0.90649262033049	0.999999999999901	0.292918363960613	0.495663119393689	0.675796304646992	0.617978956349115	0.140052185096515	0.235398700092659	0.724315911270639	0.081228648594509	0.144034949357118	1.91782958274289	2.75823164482272e-08	9.13506407819066e-08	-0.864296909943205	0.0815656276364383	0.14926191564081	-0.882770726150112	0.0907301748222744	0.155721740837952	-1.88501866208597	0.00105338475811272	0.00265747943726742	-0.361644368093901	0.513441168477445	0.737049343874393	-0.66102563208042
ZBTB2P1	0.285388676623818	0.723050216618519	0.927260027550128	0.484765660018796	0.544313214013088	0.748384499206166	0.264386270610913	0.745200958900839	0.933027397878172	0.674688214385983	0.383455037935683	0.580832019729538	2.08265642376653	0.000775305975746263	0.00182391780695492	1.89755160315697	0.00865825310612523	0.0187536684503916	1.91076638649054	0.00937385657728144	0.0203748175337154	2.16545438835122	0.0039143423306807	0.00940908773414914	2.48764907605448	0.000918536260301802	0.00234268653570953	3.45060024742564	1.23138314415571e-06	4.56855526079824e-06	2.56579011267718	0.00044459037331424	0.00116136570516955	0.351075996209913	0.619193411392361	0.795655915134267	1.03625983478479	0.222764995859692	0.355220426948457	3.71512829202375	1.5550536784525e-06	5.45306051542669e-06	3.35114086148329	2.37588405567802e-05	7.45458095341584e-05	-1.1748095632467e-06	0.999999166802639	0.999999999999823	-1.17480956516875e-06
FHAD1	-0.841755402928277	0.115089880984268	0.230526256543012	0.606996560557693	0.245033246235572	0.39450801198713	0.0729356164000209	0.889281030350367	0.999999999999893	0.102188357499078	0.845146654235824	0.999999999999901	2.17601390145336	1.09693667932118e-07	3.65087603723253e-07	1.16794799168903	0.0239632958946113	0.0475559594793859	1.51378686511643	0.00353153017229542	0.00828189795047494	1.68849897469157	0.0011595664680086	0.003029488469435	1.8389048339254	0.00039816338619727	0.00106724416239008	2.66755313614519	2.39079833351421e-07	9.50224155491887e-07	3.22661553960742	3.94176826582472e-10	1.84245005626379e-09	1.54310021643293	0.00045752824004109	0.0010590966335354	1.26736262379282	0.0311305933836737	0.0632191320895781	2.76491000894311	2.34288507349013e-06	8.05588431344883e-06	2.06587586214446	0.000454610212419578	0.00121069955266908	1.44747617467995	0.022249158066927	0.0516809342843937	0.612047927145454
FHAD1-AS1	-0.851429702302945	0.170932755127978	0.318854423013873	0.753532593387493	0.194001008835609	0.323857224709422	0.58481567576112	0.313857349924298	0.495996152284088	-0.164443009416318	0.782774474862587	0.968722899976826	2.78136273025708	7.32123204663956e-10	2.84210067320975e-09	1.93868649481563	0.000508617655970068	0.0013405634976429	2.00128075821738	0.00038963477225416	0.0010557810238769	2.06463600888018	0.000320239555621675	0.000904158525890812	2.47958082579257	1.2396228938247e-05	4.00520291625154e-05	3.15884004780458	1.44985064843486e-08	6.46710057413764e-08	3.26513556824453	4.25281133220043e-09	1.82847073657925e-08	2.4080573353178	6.01992525161974e-07	1.80854866706331e-06	1.1414909098833	0.0781147377913533	0.143701957801739	3.01692279873843	1.79218106334201e-06	6.23812005128986e-06	2.54976297011127	7.38052422467867e-05	0.000218030512822486	2.13412931492671	0.00407166047200234	0.0111098097109505	1.52162113323292
AL031283.2	-0.439980697713536	0.543610503778959	0.770132542572855	-0.436638879286672	0.544823359166673	0.748884415576537	0.478767740495876	0.46860743438004	0.677033472329407	-0.487870012313482	0.510733685695969	0.72380747599599	1.45065374833316	0.00505776384400563	0.0107598911047378	0.722959861662827	0.255156939086193	0.388379692083587	0.617138277182031	0.329831019549668	0.48511404751364	0.972303039201441	0.159335707733296	0.270108007416592	2.1870232395553	0.000459591223529993	0.0012216369718016	2.32453470293424	0.000138045322434988	0.000403243268558624	2.47046518513322	3.34140069233136e-05	0.000100039348697249	-0.660494476092202	0.296845011836949	0.434848363448185	-0.320673071815099	0.686977054106002	0.870077020162364	-0.504423840620592	0.529909580400125	0.702193249446227	0.593559484121282	0.420988829834327	0.597671407136696	1.52128645077612	0.114591064556186	0.217125475990395	1.03831151343535
AL031283.1	2.5620341783415	1.51218323406078e-05	7.34735645210134e-05	0.625364811154724	0.332432348926226	0.507775743301284	-0.816167062259684	0.255913547347106	0.420341049272757	-0.252498154617167	0.708645851314365	0.910328387657472	1.87565871567051	0.000202545720599594	0.00050678396869853	1.73381860798072	0.00388167778605878	0.00895756127969762	1.6104618173277	0.00914751634067243	0.0199195465898689	-0.384856666611472	0.6041866425731	0.800107327562105	0.70897757387173	0.301512234693191	0.451957396319051	1.3645002827603	0.0355324338140498	0.0692142505597636	1.44625600575554	0.0230723979001192	0.0459349345031265	0.0983149586219073	0.86591123165198	0.999725083508017	1.72538762387499	0.0114791938967271	0.0257268454771944	1.96302594508108	0.00471731808969268	0.0105000874960131	2.41108115107226	0.000518500317900803	0.00136784869131679	2.44330378753034	0.00816900875544369	0.0209466652144661	1.69368382267215
EFHD2	2.14448623243596	2.60458139498652e-14	3.45694328055572e-13	2.13149084755294	3.70032950714233e-14	2.9708886182406e-13	2.18015592588493	9.49947063126371e-15	1.04940714267775e-13	1.18747610331387	2.50242855461248e-05	9.3187048862409e-05	3.63644635522539	2.03183987406413e-60	5.88639110619013e-59	3.31915706131704	3.89778014703068e-32	7.85941304928366e-31	3.51149962505073	9.36764302192335e-36	2.3226088974859e-34	4.10247358102014	3.55908844431842e-48	1.5896933085597e-46	3.97931991238653	1.99039206167909e-45	7.14438828400722e-44	4.06003709882537	3.17648408050446e-47	1.30249634123949e-45	3.47448118736382	4.84015134538751e-35	9.66292369089682e-34	3.3260768927572	2.38818388322114e-44	3.61698447815843e-43	2.14519796688798	1.75644118941126e-11	1.30053684910705e-10	2.72367765840208	1.34211403086417e-17	1.18215157101955e-16	3.21710040261811	6.09847206449044e-24	8.72126978501818e-23	1.57813150222558	2.65447794511202e-06	1.20139479441656e-05	1.06607550578242
CTRC	2.26438532021447	0.00193513240238873	0.00636691852696501	-0.853011022096463	0.32779891205375	0.501982296212994	-1.12663661713286	0.220391603132463	0.371835065260666	-0.702351119730261	0.411395715661146	0.613699847462813	0.623313514537204	0.32230019392784	0.480153002995766	0.520402883530452	0.503470928476732	0.679777799514471	1.35743828612796	0.0746222623288396	0.133970557290416	-1.12663661713287	0.220391603132462	0.356662641541821	0.587809149354933	0.468815782944399	0.646865813902281	1.6918920604725	0.0289518899435948	0.0575371460837892	0.143861496331144	0.861664905805932	0.999999999999901	-0.894918059094382	0.224213834950975	0.339813085702699	0.761577495313082	0.382873606334006	0.556245155149758	0.890482480646107	0.305863102778033	0.449225193107034	2.44844695204604	0.00385757678734674	0.00893646932309651	1.18102533582257	0.298584428923078	0.480880759258079	0.838846483360052
CELA2A	1.70175027823419	0.0078370303166643	0.0222876460607027	0.0849673530126005	0.904367416964131	0.999999999999901	-1.20635323221647	0.138047758484915	0.251531802027075	0.18767077708716	0.785654825008347	0.970715456824315	-1.22240814252818	0.0440130229514174	0.0807915983263361	-1.05368358615729	0.182279696175499	0.291023029345086	-0.920337823355295	0.234440718915151	0.363865655856598	-1.36451501956433	0.105364701367761	0.188331179073373	-0.65394694006084	0.404293269561945	0.573848230444856	-1.01952182704916	0.208865414545812	0.332440716588063	-0.146141807843202	0.845947301701713	0.99201682991067	-1.01564566751057	0.122049198464947	0.197700495920671	-1.36451496763108	0.163985937632601	0.273621447545241	-1.05830325238881	0.206232004672074	0.319663311121109	2.32841475849211	0.0014052433704763	0.00348354241243594	-0.302276970013824	0.746031020331172	0.946957622538067	-1.36003080091694
CELA2B	1.16322751563436	0.00369750203442137	0.0114283127396429	0.558863745922791	0.17615355229677	0.298253931637034	0.193891203473636	0.644427979383889	0.848619900815611	1.32692547517314	0.000704302566794494	0.00210915793125426	1.23379874402105	0.000169972573211838	0.000428532033419459	1.5158601146474	8.47148410059861e-05	0.000248629474819959	1.23408684366397	0.0020304517819094	0.00494930934977593	1.31152520406773	0.00180443773782722	0.00458146476442978	1.5962235792188	0.00010996375656777	0.000317173961591974	1.69162066754946	2.67625267110291e-05	8.55390401413411e-05	1.7199415559037	1.61265816885454e-05	4.9983413597745e-05	-0.280793896417201	0.471321408842639	0.640527653748471	-1.17287596004815	0.0340268464689821	0.0684238730353397	1.35452594444165	0.00395760033644716	0.0089199746777908	0.911857358514237	0.0615953843020352	0.113095075127699	1.89465081208937	0.0017045466872984	0.00500047645434818	1.55718523630688
CASP9	-0.12740758537744	0.475369488501144	0.701854516366931	-0.183523498579736	0.303705580973929	0.471278031259483	-0.105033547212714	0.55412200178555	0.765481664451408	0.386926135501338	0.0290639072761632	0.0630508739200755	0.496477556934118	0.000387415017432162	0.000941691046594519	0.402211224985643	0.0225460856382535	0.0450323469073867	0.285864397785709	0.106988816541095	0.184426271204561	0.384675189461215	0.0302792763841808	0.0615316516775322	0.734051131415496	3.43704012138623e-05	0.000105350104958307	0.358019124840532	0.0434500918289113	0.0830279930308368	0.577804954525491	0.0011109861529165	0.00274542698212159	0.139305215436379	0.354952016995855	0.506320232439715	-0.658239942996263	0.00120467947763921	0.00326310380519994	0.49206942298378	0.0148232204190512	0.0302570390224183	0.66965469397342	0.000889338410713861	0.00226916042976082	0.769489166183314	0.000349123530081318	0.00115269086394431	0.948690749037171
DNAJC16	0.237736259519803	0.107788286641729	0.218620441683389	1.24898435678304	1.54621709370014e-17	1.5968223628001e-16	0.868123244873601	3.10693637087751e-09	2.01541270737629e-08	1.56456790906947	1.00820459565554e-26	2.16274416433018e-25	0.0445454558579163	0.702645146739545	0.890464417431699	0.25405756461863	0.0827236447907541	0.145438353909397	0.226470978236562	0.124458537458425	0.210880690478699	0.189706410285991	0.199503532747703	0.327627118060993	0.360735732457589	0.0146198332564309	0.0306410856531005	-0.161011071145652	0.277097223659991	0.422669902932931	0.44130769671745	0.0027478287991437	0.00640273229773499	-0.10501341973438	0.403024171302224	0.562620302046219	0.74227437714707	7.98610317122397e-06	3.05763668891601e-05	0.884734532353406	1.14733801179105e-07	4.5290901253679e-07	0.956784223148701	9.55327884646679e-09	4.30059496224106e-08	0.855833045067711	2.77464104233537e-06	1.25253936273696e-05	0.967258466898243
SCARNA21B	5.04841281140347e-13	0.999999999999531	0.999999999999893	5.08049808925877e-13	0.999999999999528	0.999999999999901	0.139910098026524	0.866207808860867	0.999999999999893	0.123213918136807	0.882064539508493	0.999999999999901	-8.49741021450041e-13	0.999999999998997	0.999999999999831	5.05983330355268e-13	0.99999999999953	0.999999999999901	0.190942290932837	0.813152172469227	0.964083579383675	5.04928115354451e-13	0.999999999999531	0.999999999999901	5.06834916292003e-13	0.999999999999529	0.999999999999893	0.437773414607241	0.597173099878206	0.783704665192722	5.06581330838611e-13	0.99999999999953	0.999999999999901	-5.11776142773244e-13	0.999999999999438	0.999999999999938	1.06416746062849	0.199344575594154	0.323527699017545	1.52187812951598e-12	0.999999999998754	0.999999999999913	0.0239136883058245	0.979288024859514	0.999999999999922	-1.01872513738648e-12	0.999999999999209	0.999999999999823	-1.01864583136641e-12
AL121992.3	0.504204929330259	0.186681930926421	0.342444735007237	1.54690534792893	2.19129928184713e-05	7.57249036725184e-05	1.35847586193599	0.00019137311151708	0.000668878406861437	1.59645331788047	9.66092499363691e-06	3.80648383891436e-05	0.79378778364464	0.00944787688981727	0.0193518878326884	1.30017013326548	0.000307790636433972	0.000836917170107954	1.01825034331365	0.0063244605367519	0.0141977505821561	1.24059329657331	0.00128931583847358	0.00334413271069612	1.67209804525032	8.61286254700915e-06	2.83042846899312e-05	0.557770088591298	0.161568976306972	0.266742406466252	1.21052058560471	0.00131724981811979	0.00322107600100639	0.64992915336388	0.0488652973002488	0.0859794277052668	0.615718105860756	0.151852833495259	0.255899419714574	0.897599425625936	0.0446720329493599	0.0825807469019243	0.981107545522968	0.0308729586117745	0.0605382617310482	0.725839286771872	0.151526039648663	0.275431390113667	0.458394371930331
AGMAT	-1.37496402036922	0.00143962665486615	0.00487446378724913	-2.33276200838957	9.22843966744959e-08	4.16696828184018e-07	-0.214776883644953	0.614366652796622	0.822516157303915	-1.53914308672226	0.000346131767532527	0.00109477128225781	-3.54666105308935	1.25587158708726e-23	9.96625391060707e-23	-3.17597424162194	4.517032723821e-13	2.84101448380436e-12	-3.0363853963642	1.02773586687218e-11	5.96242109477187e-11	-4.520312479931	2.8386366009694e-18	2.70408366086437e-17	-2.87398217244097	3.83305929549381e-10	1.88842534356739e-09	-2.85983777619273	2.61377015342409e-10	1.35291103152853e-09	-1.0804832863875	0.0121333648893677	0.0254081064845621	-3.20383729204987	3.25644858089599e-17	1.81038523411699e-16	0.343433797395591	0.476756593393968	0.663674741054117	-2.91959037557041	2.4905532747368e-08	1.04427789656434e-07	-2.35766870776762	5.3703180853112e-06	1.81806473203236e-05	-3.16173792989469	1.84548884906398e-08	1.08508036797654e-07	-2.76114384253228
AL121992.1	-1.0665336423071	0.118286287223705	0.23571926044491	-2.32238366365753	0.00277217559487437	0.00709403005083096	-1.91713939250931	0.00845129235818619	0.0216106586436226	-1.91172291775153	0.00870900652551479	0.0212692872549466	-2.4596689873229	1.82639628841917e-05	5.07615957314031e-05	-1.84140361369503	0.0103111801142221	0.0220183956061124	-1.99012750537714	0.00634427820513911	0.0142369534986637	-1.77549876436404	0.0215545640335952	0.0450879535566313	-2.69665511558692	0.00114967961680131	0.00288992209763961	-2.69665511558693	0.0011496796168013	0.00293395008421627	-2.69665511558692	0.0011496796168013	0.00283467312827002	-0.749023618665196	0.186736691820788	0.289334184659212	-0.22574041820578	0.757758037535029	0.936834213816651	-0.321318044252691	0.664467441556368	0.84269593020287	-0.0532504425078083	0.943794615894569	0.999999999999922	-0.764948223456909	0.35534463835687	0.552642632669262	-0.89385837154859
CHCHD2P6	1.4371358295882	4.98433948155775e-05	0.000222488839540553	0.336785892431732	0.342640389922034	0.520385123398395	-5.48936460263022	3.79302685555728e-43	2.27374631441572e-41	1.56214360763751	1.02992121439872e-05	4.04353371512941e-05	-0.0755492846825956	0.787020748956573	0.957329540859124	0.300201947468509	0.396777378363426	0.561306431642218	0.528588811286742	0.136094602283829	0.227819642048505	-0.237383239282266	0.504440948195502	0.701752041500662	0.980266545074745	0.00569506087052581	0.0128262415534008	1.05776147477741	0.00283439764017206	0.00680707922765812	-1.28489479492265	0.000326609873371317	0.000867796298175915	2.5005603978094	6.82384321421371e-17	3.73258843748858e-16	1.99728431654654	6.42217306054766e-07	2.8521341356059e-06	1.64759805745285	4.08415122596366e-05	0.00012174866325144	1.71102142431659	2.03424650870708e-05	6.43647726752894e-05	-3.15872267892626	1.51337345817433e-11	1.21535569608604e-10	-1.94869927533323
DDI2	0.0943769443275982	0.722626995718501	0.926944505003525	0.00458767705484161	0.98623274160311	0.999999999999901	0.563332567453099	0.0339842991608345	0.0747040969547368	0.0672754555190758	0.800198327599742	0.980644347917063	0.439662098491797	0.0355621661338926	0.0663470648675542	0.127697484072606	0.630706384971507	0.807398310536076	0.317395519305991	0.232339950845563	0.36099895423674	-0.150147717580903	0.572315355711855	0.775998582749829	-0.137844571110413	0.604226836451685	0.784095576315713	-0.368937822637975	0.165319039591028	0.272011406637687	-0.0672239497706208	0.800375456331452	0.957313381651394	-1.78733805396465	2.19157372877355e-15	1.10861409376214e-14	-0.656304669487902	0.0295779250016246	0.0603863260221824	1.11850498156988	0.000204327234158804	0.000556526255335857	1.07278540204256	0.000368334196451875	0.000993098494994659	0.332003968357738	0.297337885981015	0.479455186734069	0.663983078191502
RSC1A1	0.206865351808864	0.547663663220747	0.773478777326449	0.291276495180152	0.397002592756962	0.585164921134192	0.773935450468743	0.0241304575676007	0.0551825340879529	0.387388321455464	0.259628953272957	0.423090936419375	0.835993093219364	0.00200123593114446	0.00448665061523699	0.418219442139223	0.222787175379848	0.34578977201596	0.6392926394566	0.0626996640346534	0.114711454173536	0.254427303051337	0.459596646032402	0.651470097829379	0.210293994079244	0.541270991876415	0.724672088855782	-0.4199003497018	0.223218881533012	0.351813096225514	0.1094026996106	0.750569856747125	0.920120917331339	-0.506701907736745	0.0822402340854525	0.138316969265494	0.189679769411634	0.626497387849089	0.8145607964728	1.9369511782663	6.26516288158665e-07	2.29651680821973e-06	1.93135427809562	6.74679986057327e-07	2.52690248213558e-06	-0.280261534027588	0.496989766198193	0.718984507704295	0.0774582132541731
AL121992.2	2.56995332700724e-07	0.999999765672573	0.999999999999893	0.155534481206759	0.854267054616776	0.999999999999901	0.954216252803323	0.214655106305283	0.364055121949686	0.118466679018914	0.88877335079009	0.999999999999901	1.18081562566025	0.0704730167467999	0.124453899705764	1.74024577551179	0.0159370274606609	0.0327884411940519	0.3705459753156	0.64608798007644	0.822380351426462	1.15919401944168	0.148909607641179	0.254746231801766	0.450502296463785	0.593710590713183	0.775178587164823	1.3657224344406	0.0832093153970367	0.148727048259793	2.07254664867907	0.00503176230199006	0.011223897345484	-2.56995415028785e-07	0.999999722740009	0.999999999999938	0.157458837997869	0.86689703651379	0.999999999999876	0.0506759129919605	0.955409740056809	0.999999999999913	0.699659130790311	0.411036160542105	0.585806283408153	1.57335137233032	0.101023977241995	0.194738608976949	2.39967019947387
PLEKHM2	0.338013804641624	0.128113536646197	0.251655362896187	0.249710769645747	0.260923629435988	0.415842882978792	0.414659926147379	0.0617778179736226	0.126263360488924	-0.0265416896293128	0.90490497242851	0.999999999999901	1.14249547579065	6.22771882164871e-11	2.60181070440173e-10	1.24387285122439	2.03649797941765e-08	8.77373679714733e-08	1.08542306574211	9.99565453941864e-07	3.70655267945801e-06	1.3296196278732	2.06794965964304e-09	1.01504747727968e-08	1.35321555851314	1.07020345604898e-09	5.08685858858783e-09	1.34799903611576	1.23054328063452e-09	6.02291710157837e-09	1.60107780832325	5.27423771558486e-13	3.05692189091764e-12	0.392866261873662	0.0364201058144983	0.0655693960072903	1.12901111980874	7.16351602594221e-06	2.76127127368802e-05	1.97406543281381	4.11139862236486e-15	3.034068047056e-14	1.89841348192852	4.33346923709672e-14	3.05347717382745e-13	-0.205608945142406	0.438905573272713	0.650458933318217	0.232538016060566
AL450998.2	0.804371085935182	7.03858348550413e-05	0.000306152456818378	0.700569508217459	0.000525687398996712	0.00150887536650258	0.897734636086466	7.42274907877162e-06	3.22091124594833e-05	0.265570758922494	0.190410265757923	0.326401211435841	1.82453254172554	1.66375280013451e-30	1.75600223592965e-29	2.04023827954047	5.30427931317417e-25	7.27691160567708e-24	1.89195579551933	1.79738801489172e-21	2.0424019366774e-20	2.02593693668277	2.45380819418333e-24	3.47884125959056e-23	2.10492046174255	3.99832789746074e-26	5.75293983832936e-25	2.09035915914243	6.50588099858567e-26	9.69764281256521e-25	2.50583175504027	1.22272321506154e-36	2.64048170009696e-35	0.769166326434697	7.71321297556142e-06	2.12133252435668e-05	1.08414340371333	1.71959812551027e-06	7.21129143533935e-06	2.4261832854437	3.43121292050473e-27	5.57510193481319e-26	2.40983259221167	8.08583177443134e-27	1.37326542071295e-25	-0.871623684372578	0.000286983125828117	0.0009604805097593	-0.193765486637644
SLC25A34	1.27583688163595	0.00209844819546577	0.00684066186510746	0.417600410362025	0.321352751945757	0.493893266501624	0.274142463801689	0.514508284524206	0.725617359409742	0.424943620323993	0.309086984572797	0.488620849365766	2.36512993751041	5.0105673931313e-13	2.3619746948617e-12	1.4160026300023	0.000537950203940392	0.00141356212804653	1.57927158893691	0.000129441608158112	0.000374647215427053	0.810003924882732	0.0582484640947715	0.111110570355944	1.13393476308015	0.0073101030109096	0.016176676469893	1.7984257090507	1.34875942094093e-05	4.47411157071536e-05	2.53908305425205	5.29677747774773e-10	2.44859534528948e-09	-2.26038726497943	1.03715494278849e-07	3.30134807570018e-07	1.1128824333869	0.0176788864345066	0.0379971516874055	2.9530259697313	1.67994962297005e-10	8.63709604112969e-10	2.55938135210943	3.9028629866369e-08	1.65657339374605e-07	2.33653482343639	1.74213345571968e-05	7.04082461052622e-05	3.15069704227447
[truncated: 46,815 more rows]
[truncated: 35 more columns]
