# Supplementary material for: A Core Transcription Regulatory Circuitry Defining Microglia Cell Identity Inferred from the Reanalysis of Multiple Human Microglia Differentiation Protocols
Source: Brain Sci. 2021 Oct 11;11(10):1338. doi: 10.3390/brainsci11101338 (PMC8533937; doi:10.3390/brainsci11101338)
Supplement: Supplementary file 1 [file brainsci-11-01338-s001.zip › Supplementary_table3_Microglia-Spec_Genes.xlsx]

## Sheet: microglia-specific_Genes
	iHPC_Abud			iHPC_Mcquade_1			iHPC_McQuade_2			iHPC_McQuade_3			iMGL_Abud			iMGL_McQuade_protocol_Abud			iMGL_McQuade_1			iMGL_McQuade_2			iMGL_McQuade_3			iMGL_McQuade_4			iMGL_McQuade_5			iMGL_Muffat			iMGL_Douvaras_1			iMGL_Douvaras_2			iMGL_Douvaras_3			iMGL_Chen_1			iMGL_Chen_2
Microglia-Spec_Genes	log2FoldChange	pvalue	padj	log2FoldChange	pvalue	padj	log2FoldChange	pvalue	padj	log2FoldChange	pvalue	padj	log2FoldChange	pvalue	padj	log2FoldChange	pvalue	padj	log2FoldChange	pvalue	padj	log2FoldChange	pvalue	padj	log2FoldChange	pvalue	padj	log2FoldChange	pvalue	padj	log2FoldChange	pvalue	padj	log2FoldChange	pvalue	padj	log2FoldChange	pvalue	padj	log2FoldChange	pvalue	padj	log2FoldChange	pvalue	padj	log2FoldChange	pvalue	padj	log2FoldChange
SLC2A5	1.66238	0.0244345154402162	0.061015034989008	3.46713412559682	2.46594877030457e-06	9.55276206181972e-06	2.46398388125359	0.00082218643342253	0.00256607998385068	2.75623263994638	0.000181879132435441	0.000603059789793651	3.93987639108823	1.25215406220942e-11	5.45830249815552e-11	3.09624258626471	2.56191747386855e-05	8.00928287749262e-05	3.4357540431486	3.03478738392647e-06	1.06679580061533e-05	2.8308828521839	0.000122550726147936	0.000365146059498252	4.11158804156343	2.29007770877761e-08	9.66723867109276e-08	4.1894786620487	1.22593604530475e-08	5.5031398814084e-08	5.18866326712179	1.69463656269137e-12	9.47793437935825e-12	4.56892401181754	2.34359921086404e-13	1.06442404836714e-12	4.03070727854796	1.29069847943537e-06	5.49825176124853e-06	6.85789032448472	1.66108944477563e-16	1.3550125192e-15	7.41913741863891	4.67469512926167e-19	4.78871885021874e-18	1.47829157986869	0.155196228962239	0.281129127870893	4.46986226068257
FPGT	1.36577508826141	0.000126374316694884	0.000523965908690972	1.76029970860911	7.54934091621318e-07	3.09189965405114e-06	1.32277507768971	0.000201405619613789	0.000701138877408337	1.33974691459894	0.000168033048836478	0.000560183505952237	2.2989017129891	2.60948000171846e-16	1.4635020884128e-15	1.92912821493756	5.57907398849372e-08	2.30683431101296e-07	1.9203415368377	6.66254328780958e-08	2.78740338195326e-07	1.99134359877879	2.16702418155742e-08	9.70785893077211e-08	1.86822376270793	1.52780525238859e-07	5.97474432544744e-07	1.42809323307243	6.0416255830392e-05	0.000185112711724734	1.75736569587989	7.87774728482614e-07	2.77687290977844e-06	2.59422532421963	6.889578157805e-18	3.95611763469605e-17	1.90652826814081	2.20142801137921e-06	9.10745981574184e-06	2.63331978405083	6.13972810803855e-11	3.27901753938284e-10	2.2324559156339	3.04727852880894e-08	1.30767567794243e-07	2.73004884441656	1.07444959674194e-09	7.21959823631568e-09	2.38124185529741
FMO4	0.636977535796356	0.0607518710061059	0.134483159038166	0.726708296737878	0.0317177244856927	0.0656756086023477	0.127213821426491	0.708126641706532	0.904256380614984	0.521285996411355	0.12304232356406	0.224872537319189	0.377710117423355	0.161318109300104	0.262377087137658	0.0548445380682627	0.871032498101175	0.99972607200323	0.0144175291286415	0.966448270034713	0.999999999999901	-0.504882245539156	0.15677653618781	0.266386293337065	-0.101301354068121	0.772534181216705	0.925044633017579	-0.0272501487779211	0.937301927544208	0.999999999999893	2.5141405942429	5.17355090325925e-14	3.21175792920123e-13	2.08689998897319	2.27876917723189e-13	1.03553650740319e-12	0.240121216512226	0.534241856303552	0.7257836119729	2.08084303836911	4.59071293532233e-08	1.87788046393709e-07	1.78372707460546	3.11937353667749e-06	1.08424298462727e-05	1.52780438330508	0.000617515487186243	0.00195861002270977	0.702560512003103
RETSAT	1.31526922290971	1.67197415090748e-10	1.52469194915862e-09	1.444043421653	2.21203337138032e-12	1.54605823253547e-11	1.62069157163491	2.88461297878879e-15	3.33562945603539e-14	1.0186010770052	7.57329209303644e-07	3.43274792369239e-06	2.1841949470948	2.82146489283472e-41	4.47448905538565e-40	2.09504806386793	1.44757754128521e-24	1.93488998078446e-23	2.01745251677203	8.06895676872406e-23	9.99794174624715e-22	1.61506504265489	3.94139297191544e-15	3.0105321684899e-14	1.8531593737011	1.89241490589191e-19	1.8069941966771e-18	1.90282343969798	1.8323339299415e-20	1.96267478114845e-19	2.45921729545743	3.73321888647193e-33	6.80946444929512e-32	2.17253635153715	9.50551507766732e-36	1.08598311893422e-34	1.65825795716837	9.77857291215194e-13	8.23761815882979e-12	2.53042406330299	1.15740533824917e-27	1.93522507686654e-26	1.95885647896918	3.79049589828214e-17	3.37778780073557e-16	1.27257804457295	2.50390231478541e-07	1.29264299063955e-06	2.13772924648441
AC007362.1	-1.27313754809261	0.00148813085799367	0.00502070118841846	0.89409847930461	0.0142674013685293	0.0319044474112364	-0.473866180379938	0.210413067797379	0.358030405372457	0.12512199353975	0.734434885100703	0.931655487293848	-2.00411175426101	1.25265679173039e-09	4.78440873373166e-09	-1.4705592477332	0.000176370712684236	0.000496686294735667	-1.21964927416926	0.00224396736372779	0.00543050394255416	-2.77595398783896	1.96056047242093e-07	8.02014306405222e-07	0.0215789811071361	0.956093173335696	0.999999999999893	-2.93246224184525	9.28404616722856e-09	4.21521038832541e-08	3.29661021523547	1.9393226052282e-20	1.80613885989033e-19	2.62639358961988	8.27307261308039e-18	4.72696339758652e-17	4.38758969614106	3.29856375602405e-28	9.14890799493942e-27	4.93039411782973	3.70673027600228e-35	9.28170279894711e-34	4.98230576295616	7.13388783737745e-36	1.9893059444422e-34	0.11384775312946	0.788582300600551	0.973090336450524	0.0366763453724171
ST3GAL6-AS1	-1.9506203048487	1.47403607731574e-05	7.17455354808487e-05	-1.27547724218712	0.0031961296868515	0.00808399379566367	-1.11679048220984	0.00869010359878758	0.0221457932507515	-0.83408300559579	0.0463572364510426	0.0954919984178463	-1.03876910343745	0.00216510846010086	0.00483368737737536	-0.603583946080226	0.142696412794564	0.235152060234089	-0.420256052224289	0.315927031734909	0.468151522672245	-0.414957802391159	0.341167061288806	0.513409933504196	-0.227900634485341	0.59732024576331	0.77812571217345	0.144906806123812	0.728989815427946	0.895316596680016	0.355636496135843	0.389377238382897	0.562383409539469	1.48501440539428	1.46146199640095e-05	3.92289613471077e-05	1.2820960922317	0.00488810781139502	0.0117993950820224	3.68095302103062	2.53592598448083e-16	2.03941381044216e-15	3.55125769298156	2.83687424891023e-15	2.18376481687704e-14	0.215743518779528	0.684715028451371	0.891580996194762	-0.335447751446501
AC135893.1	0.873608348542555	0.0584794172142255	0.130111263291808	2.63750778474676	8.98374712664228e-10	4.98233742662183e-09	2.72981638799536	1.76291602323106e-10	1.30300209966149e-09	3.15893552682521	9.94189783929511e-14	8.97572646846253e-13	2.08139127387271	1.02254118131222e-08	3.66437727475025e-08	2.05101348086143	1.84990290225771e-06	6.56435982180989e-06	2.38520802526049	4.07949532037959e-08	1.7412638059889e-07	2.40836303465249	7.00962901389258e-08	2.98325518466502e-07	2.45847702558783	3.65138542206718e-08	1.51484712086938e-07	2.29789432426343	2.29745874674974e-07	9.14588393900367e-07	1.76400957797737	9.53489540716996e-05	0.000270152577479665	2.18939246587051	1.14106932309946e-08	3.88508214707196e-08	0.909858143907754	0.0792859723120388	0.145605821804174	1.61712311020863	0.00193918796560623	0.00458860219443372	2.08950101987321	5.67952528765045e-05	0.000170533954523022	1.62905711882613	0.00775765412891107	0.0199929488904668	2.55853663931135
AC093821.1	0.323426246455157	0.715021164894477	0.92062680126268	0.981326152595942	0.247760166205628	0.398248904095993	-0.0509035628258285	0.957117953751473	0.999999999999893	0.513173173620438	0.561537713001406	0.777181304998914	0.696230105904295	0.329585040928446	0.489400622661677	0.154375408760332	0.863916878620067	0.995257501689716	0.200734581306601	0.82398487461886	0.97243281236391	-0.0509035628258246	0.957117953751476	0.999999999999901	3.48236736027608	1.04682983883821e-05	3.40957740448188e-05	0.688722180603005	0.441174996462339	0.616379275595726	4.3387902165995	1.29102143881663e-08	5.35000257516293e-08	4.26005766922929	7.14416533525344e-10	2.63681240030058e-09	2.98571472812641	0.000432232725116775	0.00126631911819657	4.44095040654841	9.44677215443942e-08	3.76091491099667e-07	2.20024822557418	0.0133354168254296	0.0280813260734098	0.653303739960759	0.554951046788708	0.776666780518742	-1.66646088021241e-06
TENT2	1.23608082449525	5.54362703408162e-13	6.51241756301699e-12	0.995670644268507	6.34538323512912e-09	3.22692623247373e-08	1.24748419918616	3.20024574641767e-13	3.0744358007633e-12	0.905756336421546	1.26644199792078e-07	6.29292231796833e-07	1.44099975166851	1.47360301705397e-26	1.32244986364616e-25	1.39843568995457	2.87584179092e-16	2.25357354531303e-15	1.27713356244318	8.809597064758e-14	5.99531005646509e-13	1.26769694023898	1.36846244777519e-13	9.37895069229656e-13	1.29856303133567	3.49790904356107e-14	2.35404942998567e-13	1.19343725611841	3.22105518090976e-12	1.9506792766748e-11	1.8119138787054	3.33405735396969e-26	4.29045906846437e-25	1.90533203020562	1.76688741468265e-39	2.27538980082242e-38	0.358269566027757	0.0655784799773038	0.123024324811295	1.41126922157911	3.60531655959028e-13	2.29466700350619e-12	1.36338910793786	2.17935011082227e-12	1.34573440005616e-11	1.47937334534473	1.7641371403503e-12	1.55239467397032e-11	1.37641018837625
LAP3P2	0.735596070723964	0.0164906530985328	0.0431872806129287	1.96107650353249	1.5637991750663e-10	9.2737106160944e-10	2.55374190507636	7.73582573440537e-17	1.01279711811559e-15	0.872615876547672	0.00443216819144539	0.0114706153723604	1.50659064689168	4.33771603375694e-10	1.71154493582515e-09	1.25786030873301	4.04077651195611e-05	0.000123344785898184	1.24616784467425	4.80058488508665e-05	0.000147122841260958	1.22144191483129	6.78060627543776e-05	0.00020869012366339	1.13894811061952	0.000203776426080091	0.000568530331270761	1.02064547662469	0.000871825306882848	0.00226388939702188	1.64908983539481	7.42300033936217e-08	2.87488226914305e-07	2.71598907828774	1.04986033826421e-25	8.42650185288895e-25	0.790429050114098	0.0229839729858571	0.048148837518271	2.93129315186189	3.14455756549488e-17	2.70175252055785e-16	1.60097155623278	4.08147319697556e-06	1.40162428913711e-05	1.10277712816481	0.0026265854354573	0.00743881624885763	1.1314059041197
AC003093.1	3.10945349063838	1.67066385038104e-05	8.06017243391373e-05	1.09827271390652	0.167666648285097	0.285703070927681	0.277520761984026	0.746261129006834	0.933631828558831	0.217841754269771	0.799724855373394	0.980312463356576	1.05565157126863	0.112877499504816	0.190259340845066	1.52086399799274	0.0461200515884876	0.0861110566423464	1.6351291510036	0.030495018515602	0.0599575470737395	0.364595092334961	0.67729208164852	0.862246113196535	0.993688421006657	0.234719288951591	0.365463611714889	0.915443415020167	0.274547624149697	0.419593830786827	3.40862767502755	3.00305048811828e-06	1.00391541991531e-05	3.01689680876433	5.12490999534369e-06	1.42927418295251e-05	2.49410701744339	0.00198376177059331	0.00516393907449984	7.15912339973964	1.15106370998605e-21	1.32515633824383e-20	7.17175711212689	1.05128549982327e-21	1.28302420545247e-20	-1.76021560854753e-06	0.999998741895421	0.999999999999823	-1.76021561239165e-06
AC110995.1	-1.02318914060272	0.256584271138441	0.441364003868845	4.40099304810083	1.28175346728636e-09	7.00036812386169e-09	6.31369393926043	1.76118569130768e-18	2.59330201060788e-17	4.36811858459829	1.602916781446e-09	9.77779236682061e-09	6.88341516435409	1.14054747557913e-30	1.21127511933502e-29	6.31532945889018	1.62824830474883e-18	1.48469849661857e-17	6.61279449184968	4.04833441782125e-20	4.22685259644436e-19	5.77961054403438	1.21843069685354e-15	9.65424211284131e-15	8.27352695097537	1.17859827917431e-30	2.16712522044986e-29	3.77367787743781	2.78764743919669e-07	1.0999006188217e-06	9.888734934062	4.09309932060147e-43	1.17714324277916e-41	9.21982526833395	1.57088544679117e-48	2.68871457716071e-47	5.07535896343623	2.6171822923661e-10	1.72276857784213e-09	3.63236526421774	8.10244558717032e-06	2.6205042773121e-05	3.11495773490807	0.000213391871540673	0.000594281557706285	-0.52058227343945	0.654750337170893	0.860366130993143	-0.520582273439441
FABP4	0.701548206030452	0.525864274462196	0.752643641157761	1.32660506214295e-06	0.999999096241275	0.999999999999901	0.159270655147024	0.889912117763864	0.999999999999893	0.113404390378733	0.921532898607468	0.999999999999901	0.145607640722626	0.873924767290722	0.999999999999831	0.580930234347681	0.604246966029432	0.782597619420646	1.85370367176099	0.086479177947104	0.152625799874523	1.32660506470569e-06	0.999999096241273	0.999999999999901	1.32660505317336e-06	0.999999096241281	0.999999999999893	1.32660506470569e-06	0.999999096241273	0.999999999999893	0.289723102609497	0.800918775670302	0.957628903732537	9.08309517109417	4.93665896563046e-24	3.7161419437176e-23	4.10748697235513	0.000291010337954712	0.000877971619470681	9.59620594574701	7.9429781871219e-18	7.09279599006265e-17	15.6188331438919	1.40102790835227e-44	6.17441941942176e-43	3.08950649197299	0.0172777040117323	0.0411862588010798	1.66656803571063
NRIP3	-1.01590245063982	0.0411822156778096	0.0962031710584389	-0.0044841610355697	0.992771137575161	0.999999999999901	-1.14123218271061	0.0215343366736012	0.0498367283058597	0.376073168882421	0.446721405602839	0.65386370523359	-3.74832284010159	2.83712337051256e-20	1.94770958399122e-19	-2.58399407127504	2.39927723473736e-07	9.3672508213035e-07	-2.68189859973418	1.22752050894748e-07	4.99906125436239e-07	-2.2683445239246	8.52058062030675e-06	2.92254163189462e-05	-1.91589755746332	0.000152034293218254	0.000430450965520898	-2.94467478922318	1.16345910881059e-08	5.23612022893346e-08	1.16657860064055	0.0181535641701176	0.0368116688158079	1.67352746196036	6.10096774557889e-05	0.000154897539824839	4.04069594119624	4.62523695067505e-13	4.02490980419052e-12	4.81986632810339	6.03048702985414e-18	5.42052959324661e-17	4.92089255151946	1.21696256413515e-18	1.20863008167645e-17	1.08171515005516	0.0703720905571169	0.142356491869579	1.55210932063385
AP000812.1	0.67197066366389	0.452853477661226	0.677694906519352	0.782922042303241	0.378866161890258	0.563887044986845	1.3336718174474	0.121491899084044	0.225692655223886	0.752507778483097	0.398737031898733	0.599158376119453	1.52447151342167	0.0345131699336108	0.0645581553690744	2.39501632208569	0.00341513506241142	0.00794843766233773	1.95137904500769	0.0183527107790328	0.0377054864520771	1.29076795582015	0.146510086515633	0.251218759172688	2.62915001297443	0.00191770381959678	0.00465785619479171	1.95304044919272	0.0255326237300455	0.0512921896374994	6.39044709697141	3.23150175969451e-16	2.3189057205415e-15	5.10433544850745	8.49964678555482e-13	3.73285736300043e-12	1.39979665572128	0.139132046174596	0.237319197445729	7.32671011528794	5.9463043999135e-18	5.34578959619306e-17	7.30455977352131	7.8540846474505e-18	7.35324652502132e-17	5.27935129763051	3.4537520612395e-07	1.74860542461705e-06	5.30106831832838
SLC29A3	-0.857961911532742	0.0161413862492034	0.0423641883683531	0.342566314256095	0.333223125753829	0.508806889586173	0.275297486065058	0.436298034181109	0.640939519222922	0.115862325054871	0.743481732817604	0.939476780557253	2.02255701569548	3.573119869908e-13	1.69892190414881e-12	2.04806849287458	6.21280702742736e-09	2.79703628307409e-08	1.74494950023431	7.59083076404248e-07	2.8490221928198e-06	1.48899903035367	2.47397087076387e-05	8.04040532998257e-05	2.27681523130138	1.08441979937408e-10	5.57517828287258e-10	2.30081738870178	6.80433961113539e-11	3.69954638825049e-10	3.44987630327616	1.24101616892537e-22	1.3095915170032e-21	3.22239684384195	3.44475282241888e-27	2.92575803193404e-26	-0.215260681683225	0.592441685920506	0.783824493864418	4.22932613892435	3.08356312177421e-26	4.71438290920679e-25	4.19773947202296	7.15643149985769e-26	1.1473111218487e-24	0.659992078375542	0.11788411714735	0.222312841012831	0.403991972625886
SLC48A1	2.18229532116162	4.0387057982807e-14	5.27152102219909e-13	0.707390718988851	0.0144785470236051	0.0323302753622698	0.681512518169971	0.0183809884747786	0.043291920252449	1.11728397882283	0.000110439493000287	0.000377680423817806	-0.966544938593231	2.45016901795781e-05	6.72451874989519e-05	-0.886338716554541	0.00221693144285335	0.00531731578169105	-0.882515422308509	0.00242123601186003	0.00583104896951634	-1.10550616783347	0.000155045525934359	0.000456705469858893	-0.406023494278642	0.16263059958427	0.267141274561399	-0.491769100708725	0.09038705480543	0.160096490601226	1.76182751791022	1.04713141505899e-09	4.72199943513086e-09	3.15742237494497	2.96486542621203e-38	3.66240425307157e-37	-0.36809778208837	0.26318473740176	0.408597088175144	2.56405143724731	4.4578644952099e-15	3.28413141493035e-14	2.60096296449643	1.79251321732781e-15	1.40426190518738e-14	0.597073311549011	0.0894660530242782	0.175291714575794	0.810517184975037
AC004846.1	-1.17453619322393	0.0131935083510295	0.0354829056010921	-1.46480637500784	0.00221463421291636	0.00575526489638997	-4.86923026129352	2.69845319771254e-14	2.86700030814996e-13	-1.22987328986613	0.00888529048564248	0.0216626257074736	1.28351192954507	0.000366544005117515	0.000893020383691235	0.750235672022371	0.0981021150213733	0.169011812743891	0.792886853241706	0.0826401968979962	0.14658627276399	-0.230494296739214	0.626099706297365	0.817510559170665	-0.0404784050104735	0.931431598049627	0.999999999999893	-0.0353716432309333	0.939601849322248	0.999999999999893	-1.92117268241843	0.000142934806873698	0.000396387399696232	-1.52883916887888	0.000198485073919713	0.000478324850292054	2.21870673335806	1.41978591455787e-05	5.23222567333898e-05	3.88573381280071	2.40618386338644e-14	1.67697737547429e-13	3.52746064767909	4.68830196872523e-12	2.82066156438362e-11	-4.48658866289777	1.48322095493928e-10	1.08675210560674e-09	-2.48102803635342
TRAF3	1.17381971318414	0.000198024688984021	0.00079084310395149	0.991343247284421	0.00167595036359419	0.00443567034732952	0.883948187435418	0.00505468985170157	0.0135762863486743	0.437134112422883	0.166214129165348	0.290747553156869	0.905215504907572	0.000270805957540759	0.000669289360744796	0.943510145551695	0.00274352847903833	0.00648447160039918	1.1080192198024	0.000441285721194766	0.00118649959376101	2.06424137964873	5.65416126626046e-11	3.17148356833044e-10	2.18999828142013	3.60076765533114e-12	2.08698726055064e-11	1.39583973081867	9.48340391566139e-06	3.20434585668167e-05	2.45060684196205	7.12416047840959e-15	4.69249747851453e-14	1.59490652379357	2.22612945300207e-09	7.94423282671524e-09	2.85269809695803	1.27113956666507e-15	1.39075684798702e-14	3.23123869122321	1.3182757562655e-19	1.32346400710928e-18	2.81461344313147	3.04887126316901e-15	2.33965175786427e-14	-0.250119357121029	0.507797733419743	0.73117239326795	0.5294660069089
NTAN1	-0.286187454953565	0.161806461984325	0.304961570632149	0.224926572574226	0.267276570952487	0.424304078195158	0.340670751138491	0.0913412969718111	0.176701156730995	-0.0175847388234551	0.930930137900965	0.999999999999901	0.666073757611036	2.9710406579237e-05	8.08949700633219e-05	0.329927918416876	0.100570687640666	0.172829970276418	0.431674090816972	0.032664751294781	0.0637442316597726	1.03698588410739	2.65013645235583e-07	1.07061174720067e-06	1.33938960346157	2.79885432084797e-11	1.50924065700794e-10	0.950811908407417	2.32337223036112e-06	8.38355618711851e-06	1.69092502567576	3.53194143063707e-17	2.69013703077007e-16	2.56790883754407	1.35459410614064e-51	2.54563165490163e-50	1.69664914889977	7.52473064406861e-14	7.06390191287301e-13	2.43933265739557	5.17746233198631e-27	8.31847756553667e-26	2.62349255667817	4.93052265590109e-31	1.06293611444848e-29	0.940657446618414	0.000333225563738175	0.00110297638247496	1.57970080448314
CTNS	0.860460286165004	7.33327582630654e-07	4.33219047282694e-06	2.42071256582635	1.24666042775391e-44	5.81530423064031e-43	1.46729290252871	2.17734856080806e-17	2.96915167340907e-16	2.25983842170787	4.08184746066039e-39	1.78688875307263e-37	2.0444673948085	1.46460915017989e-50	3.15279407106766e-49	1.95982828803515	6.62238311447944e-30	1.18470613312394e-28	2.03813180745798	4.09308418107962e-32	8.50492960014452e-31	1.96499129546231	6.26893209606468e-30	1.20383903248486e-28	2.07101181724605	4.59862157808856e-33	9.41999512073588e-32	2.30559685613338	1.16139710563643e-40	3.58802583904173e-39	2.46486624067842	3.05369847413967e-46	1.00350921392363e-44	2.71241746400056	1.43021845624409e-76	5.2148915719898e-75	1.92998521569142	5.82965234153518e-23	1.12604337333864e-21	2.12393846994763	2.00392410831575e-27	3.30896690372813e-26	2.66435395858949	2.5141712078018e-42	9.95346541694195e-41	1.48674498406242	1.14318453765628e-12	1.02332021992173e-11	1.7431387946111
CCL18	4.03366977396434	2.66574288352404e-05	0.000124330269143982	0.2835895022017	0.79252346583685	0.970673189338547	0.98221617860797	0.342888043890697	0.532511319343249	1.11017737918749	0.281065461373168	0.452069145902054	0.776667070191445	0.365835517872942	0.534413664337982	0.203878920327375	0.850076738962769	0.988359879480929	0.882444472234776	0.403589476946382	0.572147991569291	0.907859680953568	0.398248892835235	0.580728113017177	3.67651604288637	0.000191520638243099	0.000535951444827563	2.58800991782836	0.00991508304023135	0.0215964221730333	6.57785947968044	5.00120848333912e-12	2.70607894814948e-11	7.26193327451433	1.14218488836992e-17	6.48219361904783e-17	12.6030639460279	9.75048466106324e-34	3.70459899583052e-32	10.9988490657142	4.41079864474551e-26	6.6629050822887e-25	11.6607973734864	4.07044003649969e-29	7.85026429832638e-28	-1.88532058963589e-06	0.999998873174269	0.999999999999823	0.61302046257942
WIPI1	1.36219698667475	9.12321319354293e-11	8.58899915596271e-10	2.71307423765481	2.21027813342603e-38	7.6315334866679e-37	1.42046586667492	1.28551698982796e-11	1.06514586999655e-10	2.84330545890323	5.15037123177783e-42	2.58980153424937e-40	1.57964219045012	1.69826554190851e-21	1.23018032546353e-20	1.40777024988342	1.81557615052758e-11	1.0095972540461e-10	1.48355887844096	1.57431740764273e-12	9.73593147019967e-12	0.94815289519706	6.69828479573309e-06	2.32352908156326e-05	1.18120033145824	1.97897499803174e-08	8.39070478251731e-08	1.01373859755603	1.42709179174737e-06	5.26077219968554e-06	2.39184123475797	3.44532929566877e-30	5.42339453366045e-29	2.70006878925825	3.45049853916182e-52	6.59448864205243e-51	2.8220974272124	1.03700627443197e-32	3.72748188608103e-31	3.24503880952277	1.04300112463458e-42	3.86335674084066e-41	2.76781722049785	1.73061047523623e-31	3.81832987810642e-30	1.61893024834684	1.95827283987145e-10	1.41853909119778e-09	1.49655672482205
SLC12A5-AS1	3.17211217423519	1.61375601959146e-07	1.04137968712352e-06	4.73039099850235	5.3008250412617e-15	4.53835061453013e-14	4.58076354109613	3.65512099808944e-14	3.84023466607542e-13	3.51819777712237	6.12968010718713e-09	3.52025425412517e-08	5.50635206285617	9.41996545585209e-31	1.00342493477774e-29	6.26112732068413	4.02526109045335e-25	5.56007866157909e-24	5.13328190839168	2.12435177128199e-17	1.86601177105908e-16	8.03320914251122	2.85085911501693e-40	8.90856640637689e-39	7.50283180370983	2.39272577579479e-35	5.47072543423129e-34	6.7551001667927	5.69712778989228e-29	1.00453611575641e-27	4.09691831292105	1.2791309044262e-11	6.71245381208596e-11	6.96349703226703	4.47067969720629e-42	6.24612535019888e-41	6.07454474134333	7.31317165395622e-19	1.0433320889754e-17	9.21227375435705	2.92053159567409e-41	1.01431178818774e-39	9.74338374874729	5.99827140470839e-46	2.82885690482709e-44	6.94929367409811	6.40944970550304e-22	1.25160469507585e-20	7.90319917379778
APOC1P1	0.7605996465204	0.236849020824747	0.414356401492485	0.606135547432455	0.34612487737551	0.524812672578928	0.643484218381552	0.315687541530286	0.498383489832095	-0.094135324138624	0.884307892119128	0.999999999999901	2.21548324458519	1.11753963924447e-05	3.17243879815565e-05	1.29710356969725	0.0411097390669019	0.0776888466571569	1.60521731489641	0.011817585935929	0.0252373883925078	0.973649009763329	0.133593539068654	0.232081891376118	2.38389282058008	0.000179923426022165	0.000505046598369461	2.41289795523288	0.000145241274245495	0.00042300771142083	5.01793417508622	1.7405606738662e-15	1.19257990760524e-14	4.58701877900207	1.29662151638672e-17	7.33858423154211e-17	4.16382409537081	5.14430645917934e-09	2.93763158114327e-08	5.96227948584075	5.45724669602519e-17	4.60398510362125e-16	6.76950983596704	1.80830963980374e-21	2.16909191748801e-20	-2.56070133497691	0.0130955784311759	0.0321365181751497	-2.56070133497691
CRYBB1	1.7367213721373	2.35226988080643e-05	0.000110903455793645	2.68378899846611	4.19734891635567e-11	2.6201878839963e-10	3.40491181870541	4.24237871324417e-17	5.66574055067896e-16	2.55835774552862	3.12659678791918e-10	2.04106432418373e-09	4.28605049829227	5.54438473760091e-40	8.44640100748796e-39	4.17305695106933	5.16216494502873e-25	7.08998878154102e-24	4.2883563867927	2.91306324469825e-26	4.49055475894801e-25	3.13917118350203	1.15148084170048e-14	8.49353198468697e-14	4.62401806251749	2.89607337154868e-30	5.22144342945973e-29	4.6434914009133	1.53056446673255e-30	2.93422377090282e-29	6.65189900575884	4.83638293849718e-61	2.90621555135309e-59	4.50612249188812	7.93643317656914e-39	9.98134081600498e-38	1.3036678597031	0.00512365090789056	0.0123093033480872	-1.53632469420842	0.00417707517541495	0.0093799429231792	0.437496911885583	0.378849379800246	0.547421180892284	3.14704343763636	1.08346448048931e-09	7.27706692234801e-09	-1.55413047129841
TMEM51	-0.543363174702386	0.286781128664627	0.481249073669792	0.31448793263595	0.536452627747924	0.74007024190196	-0.272757203546258	0.592029186771636	0.802274447631298	-0.58971249117334	0.247176372465364	0.406095257455662	2.88164520402117	5.70575795425855e-13	2.68253520153162e-12	2.80313258420971	3.27897828821495e-08	1.38382495843502e-07	2.56309505405203	4.39816215460856e-07	1.69510236558744e-06	3.24181553865025	1.66444187895242e-10	8.97892795924673e-10	3.45822282159391	9.34134296201216e-12	5.2399598325207e-11	3.33953283367253	4.62140045296453e-11	2.54905526852739e-10	4.11362286866273	5.07323228258954e-16	3.59729500448115e-15	3.07941935332292	7.28475291092038e-13	3.21071791773104e-12	1.67928985764898	0.0035204272570326	0.00874426477977798	2.49711886769841	1.42285662792925e-05	4.47248905936995e-05	3.08705840254593	7.96318160843692e-08	3.28571659943975e-07	0.585691584352841	0.337435709218524	0.530032600746148	-0.430373526062554
FPGT-TNNI3K	1.58491347140523	2.05818250471074e-06	1.1416435765033e-05	1.9241818793998	7.20180456133704e-09	3.64254383150938e-08	1.42333645870276	1.90287766712884e-05	7.797209608099e-05	1.64382129018483	7.76351629591789e-07	3.51436060062171e-06	2.08379331049056	3.07641727637041e-15	1.63394653261505e-14	1.88592892614889	1.22054941404023e-08	5.35282291979763e-08	1.92407181535608	7.14699876766424e-09	3.26159061691204e-08	1.83278708847081	3.91013033124886e-08	1.7076989392696e-07	1.78823653911599	8.54751893521312e-08	3.42197772644006e-07	1.26968708039524	0.000149884453197468	0.000435644346276692	1.55061196600502	3.44676482232906e-06	1.14599185339558e-05	1.74302073518221	7.66200265722033e-10	2.82279614881487e-09	1.71706024190075	5.02139249053154e-06	1.97509664550684e-05	2.74058200830786	2.95862229608284e-13	1.89682231469676e-12	2.6549707534429	1.65313756304513e-12	1.03137858345983e-11	3.04448919795681	3.64510141072426e-11	2.82037109481379e-10	2.66271113892299
PSEN2	-0.973838438995755	1.05192459998159e-05	5.23160268786379e-05	-0.739440648886731	0.000790607524762661	0.00220668500348186	-0.993050889310236	6.38635539014921e-06	2.79533237179835e-05	-1.35495272613187	8.97202835277575e-10	5.60005067753318e-09	-0.274934157268336	0.111669128908351	0.188453549709638	-0.0806557681866427	0.711901357331531	0.881581689163042	0.0537430153480397	0.806165242763395	0.959707786481524	-0.301778301305417	0.169709148135436	0.28522481491055	-0.325285438156307	0.139253861047535	0.233500217752385	-0.130662539415	0.551213325015169	0.735943013955386	0.662432721687511	0.00244489059752994	0.005743053118745	1.65623110667415	3.01164064461426e-19	1.84792285058316e-18	0.522325775202006	0.0350096095031732	0.0701938512627755	2.07672465569754	4.15903919027041e-17	3.53990017077207e-16	1.4940694997324	1.53525942687013e-09	7.43063266675538e-09	-0.288912231640924	0.271644428760102	0.446940713387005	-0.186744243756877
AC009237.14	2.73759180035397	0.00107566051934869	0.00373582647985251	2.59948009441267	0.00191916546647211	0.0050306595377509	1.31283572107112	0.125471366439889	0.231920177024168	2.39977606725285	0.00412950373994231	0.0107482638908921	0.592946357242928	0.396819525971254	0.571979724311123	-0.27060318989453	0.76415188572262	0.925102464350685	0.0129576255325311	0.98831725066493	0.999999999999901	-0.961509025577402	0.327367649435198	0.496603969591767	-0.325545636405208	0.731181409933561	0.89115290397593	-1.48956448743006	0.140522734260949	0.236113566383833	0.676331952787909	0.450955110455242	0.632740595453308	2.32859265503188	0.00124290465952877	0.00274056987184875	5.06587723143896	4.15648966344221e-08	2.13390345154277e-07	2.7045688009281	0.00456984085725999	0.010194290660901	1.87250295207358	0.0556577540405916	0.103250178314966	0.476772556632594	0.626006215482183	0.83227288490661	-2.61513367546603
TNS1	1.2585489742258	0.00351988416801483	0.0109365762313041	3.95640153528468	3.55229397529101e-20	4.45321159258423e-19	1.01773175230345	0.0182136172112183	0.0429448256067845	2.85959414015262	2.99396459930269e-11	2.15562090819116e-10	-0.815598509972514	0.0172528085697666	0.0339670671662841	-0.855963485155471	0.0479485765350213	0.0892666933275059	-1.1263671988577	0.00989380469143863	0.0214250610770418	-1.25260948707339	0.00446842379314643	0.0106342154947295	-0.113583686206158	0.793680996485225	0.943243747477107	-0.752145302711578	0.0844567476374955	0.150691500321412	2.10191542773795	1.05201879987206e-06	3.66954899092955e-06	3.959525678111	1.52346593241462e-27	1.31125351678437e-26	4.47575013158071	3.88712619530767e-20	6.11769401142177e-19	3.86307232891292	2.19459450916649e-15	1.65010436283096e-14	5.50054000220227	1.35040310321288e-29	2.6854041433822e-28	-3.32205853125557	8.38776330801285e-10	5.69271228995120e-09	-1.91647749129047
MORC1	4.68249763110513	8.89161033373535e-10	7.52172273163783e-09	6.62549775014509	1.63290871885718e-18	1.8280188256718e-17	4.65074169171678	1.0516705691617e-09	7.16540641504271e-09	4.56751037027991	2.04360810167243e-09	1.23245798157587e-08	1.5906702098458	0.0252217367657159	0.0483769189558501	1.29204039478746	0.1228841051987	0.206326720610091	2.18971111080588	0.00601727529274691	0.0135553326380127	9.19215625209688e-07	0.999999231585147	0.999999999999901	3.01751178698819	0.000211262980353029	0.000587785923132054	1.98394027969102	0.0197765779837876	0.040630924418066	4.16224033677755	8.15122772700827e-08	3.14257861511573e-07	0.226668237830933	0.776221376323533	0.935455272463573	2.75764558016339e-06	0.999997966965355	0.999999999999876	2.02921733774069	0.0220924584507233	0.0435592757132222	0.602151942596995	0.535409373524665	0.713516318532767	0.682054852475153	0.534669242363568	0.758079331298111	0.487300492981233
AC021192.1	3.04740958072676e-07	0.99999972948631	0.999999999999893	0.456142770872966	0.590926006759673	0.794885117905109	3.04740947501369e-07	0.99999972948632	0.999999999999893	3.0474094525897e-07	0.999999729486322	0.999999999999901	0.300862722290475	0.665043486561845	0.855979620536135	0.567771799781924	0.488560265147261	0.66347910460327	3.04740946540341e-07	0.999999729486321	0.999999999999901	3.04740953267536e-07	0.999999729486315	0.999999999999901	3.04740951025138e-07	0.999999729486317	0.999999999999893	3.04740952306509e-07	0.999999729486316	0.999999999999893	3.04740951025138e-07	0.999999729486317	0.999999999999901	3.52842890541309	8.21244593227612e-08	2.63361955731056e-07	1.7677503292478	0.0318914542227185	0.064606983622552	3.09240925990015	8.52636871291326e-05	0.000244082564575591	4.15188816314543	8.18993523017524e-08	3.37497545777626e-07	-6.09481595162017e-07	0.999999547344113	0.999999999999823	-6.0948159676373e-07
LINC02172	0.048590736342962	0.958140366375838	0.999999999999893	2.22383939905908	0.0051441448849493	0.01252517846276	4.91990169593846	7.65279655891693e-11	5.85606918926874e-10	0.814619863219689	0.340956534256902	0.528811133143388	2.74776135064832	4.49491009343417e-05	0.000120295942505956	2.22561207046742	0.00480461250167892	0.0109104084378797	2.54300811938295	0.00142057097218861	0.00355036319492016	-0.128346665916873	0.892716001015466	0.999999999999901	2.80171360312022	0.000605869790522254	0.00158486384399711	-0.128346665916876	0.892716001015463	0.999999999999893	2.69136966671976	0.000832833107884006	0.0020938999962408	8.02879974715304	2.63895333422502e-32	2.68001665460518e-31	4.09294276939052	9.56277522266031e-07	4.15045260028155e-06	2.51514193081705	0.00398085945357727	0.00896810428454675	5.33025477635055	1.66661818360534e-10	8.78665133390709e-10	1.1613879987999	0.292725744833488	0.473878547768153	0.254255207949752
GPR150	1.19327284190244	0.0608803047700821	0.134723271639856	1.69116662610418	0.006878518639749	0.0163562199361244	1.78842850645305	0.00401282609539539	0.0110372578472221	1.69206370918663	0.00639563041968394	0.0160423038782147	-0.313343572928572	0.565591744557877	0.75938314526535	-0.0413328909681411	0.950411079347512	0.999999999999901	-0.0791289534993196	0.904994724777697	0.999999999999901	-0.415600160502191	0.579260091920465	0.782696883420912	1.67090863254406	0.0104855176036443	0.0225929113279818	0.102747406068655	0.885027884039912	0.999999999999893	5.00365893876275	7.95276220012402e-17	5.93030624181593e-16	6.89638346649419	6.39274967736893e-40	8.35097240546884e-39	2.4193692284422	0.000445867543997514	0.00130264826266502	5.80239122002446	3.93287814013004e-18	3.57730948059642e-17	4.84350198734459	6.63293742451416e-13	4.27001884141326e-12	-1.36735399792023	0.181670824992785	0.320327911914304	-1.36735399792024
SPATS1	0.162593313469188	0.789414450343797	0.975711554961452	-1.65331547564446	0.0216370452547795	0.0464844236026256	-0.703561070672657	0.274679787597856	0.445723842166587	-1.53856222686454	0.0257460031600367	0.0566302023854337	-0.346576464162168	0.486727721603487	0.674665478437533	-0.385227527439983	0.534826683287749	0.712802621591908	-1.21812989942431	0.0780760905312462	0.139513676157806	-1.35926114516586	0.0634200527430514	0.119897534347115	-0.570690090926486	0.404283222933432	0.573848230444856	-0.51106567481169	0.434619268388301	0.609270005750641	4.90363394332989	1.07557771264781e-19	9.59943186234552e-19	2.63274013197455	4.88923226858151e-08	1.59364176518586e-07	1.03554363352082	0.112150609410716	0.197170455042696	3.13234155431889	5.02447605335479e-07	1.8604393526698e-06	2.84279641010739	7.55710429562152e-06	2.5114204321664e-05	2.91619866514785	0.00265403410873003	0.0075084511705145	2.56642557230476
SUGCT-AS1	0.11990130793479	0.884363528525747	0.999999999999893	4.05787946504688	1.16897459543652e-09	6.40902279327333e-09	1.24148035526244	0.0955755437549085	0.18383085469077	0.812318587224167	0.296959125027691	0.473039936607649	2.20016764727512	0.000410544380556328	0.000995126937517103	2.26078447395978	0.00118071423596952	0.00295105351537427	1.44377402426897	0.0511083486422805	0.0953732022557301	2.49693671405902	0.000735279937451173	0.00197521499496449	3.79984328904645	3.53871072564281e-08	1.46952156964562e-07	2.19201918402719	0.00303801534459135	0.00725305926269677	7.23999209947323	7.69660070443111e-29	1.13163424278251e-27	7.1962310998265	1.5870150778678e-32	1.62277338246906e-31	8.0032675306544	3.16492748566641e-31	1.04560285348377e-29	8.72879877769998	8.29749595309631e-37	2.28062225551585e-35	8.78035130795287	3.17086023780548e-37	9.48017642576682e-36	1.38730478057105	0.158913996247346	0.286774925150362	-1.77208924599058e-06
GLA	1.82275116346923	4.03530742781679e-15	5.73625690544032e-14	2.06844282779755	4.81983510911772e-19	5.57908312355471e-18	1.63583960775579	1.78023828782877e-12	1.59812079061512e-11	2.45882002197468	2.88002188254711e-26	6.05718689236745e-25	1.07844085287848	3.79994319209864e-09	1.40528075428739e-08	1.19237490432306	2.73318101968048e-07	1.06049703589479e-06	1.24201145147449	8.78818247745714e-08	3.63404642658603e-07	1.2370563020825	9.97142454753232e-08	4.18414052426944e-07	1.34148191057072	7.59884520533294e-09	3.35966539652108e-08	1.27891883869912	3.60045375659426e-08	1.54880825152758e-07	2.05423664420978	8.27902914032713e-19	7.01614359854667e-18	1.296812285134	4.09048505248916e-11	1.63574185525753e-10	1.95745013439002	9.5506889114718e-14	8.87530624973212e-13	2.76776956523375	6.01330155415513e-26	9.01264238433619e-25	2.79543586354666	1.94013852412398e-26	3.22110269941365e-25	-1.2742251919444	7.54107643918728e-06	3.20830251065378e-05	-0.599956507825583
ATP6V0D2	6.05570675315896	7.51555329097589e-16	1.13932025290702e-14	6.28673311551232	5.40627120231783e-17	5.38656141853183e-16	3.85783619181493	3.92033526741416e-07	1.99681773805092e-06	4.86241861371933	1.1073789153995e-10	7.57883988039334e-10	8.43765561111423	3.00810019023773e-40	4.61954244785547e-39	8.46455836254978	1.04565927962599e-29	1.8528086568992e-28	8.178885297487	8.23654367636507e-28	1.38679543075812e-26	7.08362737676319	3.45328086124102e-21	3.99153058783302e-20	9.75749674457298	6.42529410475393e-39	1.71766620048818e-37	7.63870980339151	1.93044531916304e-24	2.63094187943753e-23	11.7793206062592	5.95475385505562e-56	2.90372286522788e-54	12.4889324193379	1.03191551133316e-78	3.95927219598326e-77	9.51146561122985	5.89956077268036e-31	1.91531509546904e-29	12.017146743621	1.99678264357169e-48	9.59178067087875e-47	12.0510216118051	1.08676181315242e-48	5.77780153700943e-47	3.59844171176288	0.000108054483294451	0.000387707529614885	2.45080804347204
HPS5	0.974614882472183	4.27371828211708e-10	3.73985977199638e-09	1.12683001503546	4.90992123314905e-13	3.60515512767333e-12	1.60733128065138	4.52545553172452e-25	1.04891532361173e-23	0.903394896058387	6.94705037120661e-09	3.97174881936387e-08	2.02544410400138	5.43378465445097e-61	1.59947747934912e-59	2.09775673704966	1.01625528840014e-41	3.12487555600443e-40	2.07303567391137	1.18026833156703e-40	3.62036271419735e-39	2.42985927015989	3.17360301450915e-55	1.84515262765446e-53	2.52978808627071	1.02343117531862e-59	6.4630773300168e-58	1.98972250252593	1.42571631633093e-37	3.80704135865032e-36	2.21864100640693	2.49046430655045e-46	8.21768280359925e-45	2.11202773194	8.66314638938514e-58	1.95261999126302e-56	1.8992802832828	3.34897535740518e-27	8.64927108368906e-26	2.79486860858144	4.60777926495795e-57	3.26855662571668e-55	2.47016784350667	6.58685532205865e-45	2.94294330579951e-43	0.863531321261867	7.88835880869026e-06	3.34881284304935e-05	1.17108974025947
MMP12	-0.221466192558676	0.842638633386055	0.999999999999893	5.99569548417904	7.42329138347962e-10	4.15417485068324e-09	2.59073728893899	0.00936276373111147	0.0236900139464627	0.0745441122889035	0.945863635805341	0.999999999999901	3.76708407060252	4.35537590070565e-06	1.28089703724287e-05	4.06766512140798	3.23791679029591e-05	9.99347597122339e-05	2.4865164040436	0.0137757246140292	0.0290371313239982	5.76709285434961	3.58426534677244e-09	1.72125153995258e-08	5.83046822328295	2.40531001515345e-09	1.10729586965991e-08	4.2889097544749	1.40157635018167e-05	4.63856666808181e-05	7.93338054661625	3.2018601164731e-16	2.29865805007648e-15	13.0271272440329	1.20726167106406e-52	2.34264270470155e-51	10.0459037619039	9.51958068528079e-21	1.56687904903065e-19	8.43074370896769	4.75753730165253e-15	3.4964455590615e-14	10.2434608537823	1.66469342699499e-21	2.00238837932826e-20	-2.20929817604864	0.0831160185442975	0.164342878525617	-0.40936003591403
DUSP29	-0.571508996263756	0.528758342555202	0.755435315224876	-1.37902119784815	0.165982196497391	0.283301816843735	-1.37902119784815	0.16598219649739	0.293838811825778	-0.736141466853818	0.425150510962898	0.629539784094779	-0.69755129273426	0.331509119865554	0.491859395674661	-0.381413336113536	0.670853252614346	0.844401248698024	-0.858164214034506	0.353767224743621	0.513650557165421	-1.37902119784815	0.165982196497391	0.279758076347327	-0.512608379158292	0.586394567200071	0.769388372057934	-0.087951551382274	0.92370638544155	0.999999999999893	0.441635816323302	0.619701739916564	0.808698399292758	5.28350000236339	4.20435846093582e-14	1.99059492018842e-13	1.16149541661351	0.222594958011033	0.35496759351897	2.44378264681293	0.00849478021896266	0.0181141988172683	0.0525927842850803	0.958272445545299	0.999999999999922	-1.04682790995735	0.387680691277204	0.590833128371069	-0.193090491676396
EEF1AKMT3	0.935500918393603	0.00287035327454385	0.00909856916049039	0.583297323467356	0.0634539500742391	0.121610852889904	0.247893711273446	0.430214517701022	0.634330404614763	0.592328843175947	0.0590330656249133	0.118234783184578	1.05351464176087	2.10847340818136e-05	5.8235315693667e-05	1.37825224807692	9.71019550089533e-06	3.19422840506501e-05	1.37974366533485	1.0165553836297e-05	3.37871606241031e-05	1.20137741756924	0.000126766545192389	0.00037714976877984	1.86979799735555	2.16271388278221e-09	1.00009902771398e-08	1.26429827365699	5.32752687934543e-05	0.000164202262299126	3.2489869466973	1.54925481601884e-25	1.92901166577295e-24	2.35379489232512	5.66340991354497e-19	3.42891881029765e-18	2.32604474086593	4.11939954905447e-11	2.93433346781171e-10	3.71249777732982	4.92437587259213e-26	7.40845310315045e-25	3.69642722726724	7.99177864871621e-26	1.27688452257474e-24	1.6999444856838	2.36766264621145e-05	9.37715103706636e-05	1.47021173846283
ACOT4	0.497510261598803	0.202921002854981	0.366818423410161	-0.143930448235736	0.717300244296634	0.910158295972538	1.09710368327726	0.00407569501847727	0.011191931495629	0.184610756106684	0.635082021694328	0.848290007881257	-2.14457484187725	1.17120277633367e-09	4.48090724511678e-09	-1.55523001883923	0.000196832099831085	0.000550144979784426	-1.95206825643065	1.44448743280987e-05	4.7107254491547e-05	-1.04910367215107	0.0214138621070108	0.0448265861044848	-0.249736971050275	0.555754838305811	0.740290795069276	-0.112797774088502	0.783886698541514	0.93755851495723	-1.06257232968428	0.0145267548567077	0.0299928598183244	2.18013817307688	1.61378555017338e-11	6.60779230124351e-11	2.3565973347999	2.96305600693274e-08	1.55011811307835e-07	4.27365990492682	3.69511137695125e-24	5.01425451867575e-23	4.22085460004972	1.39665145653959e-23	1.94311666775899e-22	2.00335599233139	9.41987404641321e-06	3.95244795106077e-05	1.10916069279181
SPPL2A	0.701960849922377	0.000294605634002887	0.00114114689080725	0.705492677358479	0.000272792774606137	0.000816824814981285	0.642371642278654	0.000897039250326537	0.00278022722050224	-0.1760490123527	0.366149801143687	0.55974288557202	2.00269127693855	2.00276034736256e-39	2.98490871638373e-38	2.11915615878706	3.24597934146966e-28	5.3046540096254e-27	2.23811248391944	3.30339002524527e-31	6.5624183035396e-30	1.84110856611558	1.37232685109075e-21	1.62944444692717e-20	2.31331890126731	3.38361132778746e-33	6.98259712934452e-32	2.06239732960631	9.87077387619544e-27	1.53680206193093e-25	2.35364453143527	2.44367949187762e-34	4.71161124110256e-33	1.89451208188524	4.95354899556905e-31	4.81623041715473e-30	2.61160039830812	4.15582543377865e-33	1.52298071576812e-31	3.23477233666296	6.50838296801936e-50	3.36686908324622e-48	2.73953437772258	3.09317222492178e-36	8.75744873281163e-35	2.83545012059552	4.03494005937793e-30	1.4160361336169e-28	2.65702528438841
AC098965.1	-0.181404061684132	0.666523109853084	0.879284836488121	0.102889747096286	0.804546073226403	0.979915077051586	1.01573634167284	0.00985614944874657	0.0248108143624003	-0.381951443199915	0.365035805465657	0.558422561582821	1.80204349549031	1.18264250086704e-08	4.21553728296818e-08	1.35700318417746	0.00041520525174647	0.00110873439926757	1.4693086002804	0.000173188374222568	0.000492773438401758	2.3090320065182	3.08311196263841e-09	1.48916000967257e-08	2.20693789817718	1.71177407708342e-08	7.30302312853952e-08	1.8793730037589	1.71035547210754e-06	6.2547078606444e-06	2.22878639442193	7.99467840030651e-09	3.36283981093937e-08	2.74234443617516	8.70071794685067e-17	4.72959709280025e-16	2.07704595007281	1.43591452210562e-06	6.0780047544138e-06	2.78223725566662	1.5076601263756e-10	7.78764731412546e-10	3.03557109756049	2.26586794468363e-12	1.39715932102349e-11	-1.22854639273557	0.00976467401779935	0.0246093958586559	-0.706553770838299
AC027796.4	1.04843003635338	1.12523018224115e-05	5.57154068328356e-05	2.07093640910141	2.95087713511021e-19	3.47390556477699e-18	1.23684633978122	1.19275184117077e-07	6.48130895218955e-07	1.72274745370179	9.40822236802032e-14	8.51138845349255e-13	2.21842052233414	2.90268792185295e-32	3.29243944327288e-31	2.32403945884995	1.43334668843002e-24	1.91851907469356e-23	2.25272264797148	1.1713622623396e-22	1.43630688760846e-21	1.86316664322553	1.96183104406347e-15	1.53162771295162e-14	1.96997514785759	3.97617965417783e-17	3.27160422094406e-16	2.18396868189442	3.39356560867651e-21	3.80493374453009e-20	2.38530456420322	4.10390925858352e-25	5.00550687255322e-24	2.39918209009666	1.50481099311287e-33	1.59307394559353e-32	1.02058183794651	0.000136438920644505	0.000434432640196252	2.46166637748077	6.73366999973138e-21	7.34083439149663e-20	2.96251964416139	2.47766132962443e-30	5.13613837597845e-29	0.526398560030187	0.0545762231299715	0.114111944581731	0.836586752252834
GSDMA	4.16140143572819	5.81287823507137e-09	4.49472792912206e-08	3.88814490169599	5.77349970010971e-08	2.66693564737784e-07	3.21156013679635	8.81575794817868e-06	3.7867596453407e-05	3.88430716378047	5.31926546148063e-08	2.76735672368469e-07	4.13721119995185	1.09380421649173e-11	4.78235080914185e-11	4.63505167005725	5.82078411212628e-11	3.10268638959652e-10	4.46250548115818	4.02937644421825e-10	2.05821569943157e-09	3.92245455256503	7.65144692420469e-08	3.24186250384999e-07	5.482553677595	1.22678817265229e-14	8.53081008561408e-14	5.22453035773311	2.0022548357871e-13	1.32968524782898e-12	8.76581253476773	1.04818330268735e-35	2.16497740823634e-34	8.52100736851126	6.67777677281401e-42	9.29639039131222e-41	5.1147096701249	5.01564513673531e-11	3.5448278481035e-10	3.33368501229437	4.22402783686971e-05	0.000125657972928491	5.12557805924972	8.15112771175739e-11	4.41055220791989e-10	5.54420661893164	1.3676601498736e-09	9.09405440590926e-09	5.12397232502374
GAPLINC	-1.35765745498423	0.0452610653030379	0.104384188151528	2.60817263995712	2.35228276876648e-06	9.13731425146881e-06	3.19366378803206	5.2126512321986e-09	3.29052527402599e-08	0.834892993772935	0.146548066390652	0.261132707684643	5.52611887959677	3.28598440323432e-35	4.20719870153955e-34	5.05771992285815	7.41390515774251e-21	7.87338823700282e-20	4.99406363149212	2.89566114842425e-20	3.05167356716179e-19	4.69069754412292	6.20905267443078e-18	5.77930546508063e-17	6.0267518288414	6.82556377423254e-29	1.14333034043767e-27	5.04530678410304	1.23591571826049e-20	1.33901263264842e-19	8.6156905964615	1.3578733478125e-57	7.18647783957702e-56	6.70497509868394	5.12338650173054e-46	8.12649648501864e-45	3.76924963152	5.66589043321473e-10	3.59322172402446e-09	6.239194759053	3.55046103961315e-25	5.09713124519789e-24	6.06502539669399	7.77507498496708e-24	1.10336176472061e-22	6.72736502084686	5.98706949396079e-13	5.50896587683867e-12	5.28463238782671
CD40	0.0560762367251068	0.898780853913077	0.999999999999893	1.17641088410271	0.00749450191261474	0.0177207713862016	-0.574420912685206	0.192684303615097	0.332912525598623	0.786216317952207	0.0740000222633217	0.144222525259616	1.68712223701368	1.10967086627611e-06	3.41927522157059e-06	1.81789203631932	3.51957223792131e-05	0.000108220358419125	1.84045649218116	2.83292472963718e-05	8.92865962644899e-05	2.25127920475446	3.02970219719711e-07	1.21774644275044e-06	2.44350548385528	2.71024757474699e-08	1.13698014820891e-07	2.10690392429291	1.64058552730739e-06	6.01072974120991e-06	2.29281576686611	1.82315951950423e-07	6.80491477137177e-07	1.94650297053357	1.65457051748436e-07	5.18580224200216e-07	2.03798052794639	4.30229240745054e-05	0.000148065983465439	3.78107430847594	3.10853337465752e-14	2.14654198879704e-13	2.52398445236078	4.05719164477673e-07	1.55590279894448e-06	3.30772769074461	3.78379173484531e-10	2.65974658004298e-09	4.63006902254872
APOC4	1.35923701667682	0.0599557789291835	0.132970145512834	1.22996507157414	0.0940607986452365	0.172813362181094	0.816975404104162	0.277404759884741	0.449112953445368	0.556945850719593	0.462479521659389	0.671273198944689	4.45490120901179	5.90508687674408e-15	3.0879463070815e-14	3.13824528295974	3.10871957357931e-06	1.07828834026066e-05	3.17946853273927	3.08934097179907e-06	1.0850264345374e-05	1.21654482416866	0.121191730417994	0.213093220003258	2.72698888477474	0.000134525070552619	0.000383636848448085	2.89814529074877	3.84794510644129e-05	0.00012049412197081	5.45539153782061	1.63178983731474e-16	1.19290569442989e-15	3.63578998311097	1.73971363239916e-09	6.2537821439767e-09	2.99230516261573	7.21522401934528e-05	0.000239825579631004	4.49368900044986	1.1053372438544e-09	5.25116316500116e-09	3.48489152944222	6.14522922531723e-06	2.06608495633426e-05	0.833221800473156	0.438445652997264	0.649915502263525	-1.3559232514057e-06
SLC66A1	0.466911342640416	0.0175123224217505	0.0455071830914417	1.66000993226251	1.58021503891532e-17	1.62984524685396e-16	0.811835360131602	3.19808461804913e-05	0.000126406094136714	1.9277492065501	3.68183004751355e-23	6.48347888199393e-22	3.19513479712823	6.89723125300398e-96	4.97072513198661e-94	3.37629382782575	4.54915778935136e-68	3.82042378028287e-66	3.29063173482331	1.27184184998766e-64	1.01022669637854e-62	3.67479391534709	3.64228914587285e-80	4.38279733465939e-78	3.47883118148115	5.45240968495243e-72	5.06002900369544e-70	3.58265327845583	2.60317696481408e-76	2.77576230895988e-74	2.79927341191545	3.56019848850203e-47	1.22226743423924e-45	1.79199836083805	2.15365726372661e-27	1.84371409362235e-26	0.811875455655374	0.000244454946061689	0.000747760173838273	3.24774455815227	1.38695000763303e-49	7.03432245301285e-48	3.24868357208248	1.25535039256697e-49	6.97487225089008e-48	1.11656418949951	1.78339542721085e-06	8.2533800132418e-06	1.07556584205995
MCOLN3	-3.77150991990388	8.69768347495319e-10	7.37219584256888e-09	-4.78217419796143	4.55006944459579e-13	3.34804547069413e-12	-3.43773946722723	1.75891995356599e-08	1.05185595450812e-07	-0.285693751341718	0.620638908506161	0.834366236484035	-3.28111240810718	6.55975133015366e-12	2.90370896832577e-11	-3.19655511144741	9.33973841077944e-08	3.7765708112065e-07	-3.44392106178753	2.32528199405773e-08	1.01215572661346e-07	-2.43762298084995	7.49995163411606e-05	0.000229631723778148	-2.18699677319236	0.000329726115821186	0.000894359605687359	-2.52072560889988	3.65232667317147e-05	0.000114662320181518	-0.14449026969057	0.80287731151198	0.959087147333819	1.74827108983296	0.000322240637346777	0.000758408816351358	1.59098184942586	0.0144645682593111	0.0317007453399571	3.17538660240337	1.02231513044975e-06	3.6590091512358e-06	2.92403413287729	6.8204178001307e-06	2.27815064790149e-05	3.41112606733959	1.04027957155105e-06	4.9575954521143e-06	3.56622495749621
LINC01954	-0.840168337463401	0.429198670131129	0.652270323542679	-1.01545703398677	0.349398237392805	0.528632582803771	-0.528544931605071	0.608238514788477	0.816858463112708	0.0749647373450321	0.939847836133243	0.999999999999901	-0.862271696960266	0.290192849815945	0.438776551755603	-0.472931216351205	0.642527350627719	0.818523531336634	-0.307570391415938	0.762992480614244	0.924300299635693	-1.01545703398678	0.349398237392804	0.523264425306567	-0.607664377856341	0.56630875954379	0.751405546746285	-1.01545703398677	0.349398237392805	0.512626554221765	1.13047764417454	0.246501679947807	0.383153975262055	4.1490977629121	1.88806815882347e-07	5.89138685058058e-07	-1.01545500132552	0.415756242544888	0.594427085789696	4.93704439967521	1.45752968178858e-06	5.12669878495165e-06	2.33082917249615	0.0288388574094837	0.0569138516420326	5.54087417422685	9.6649801936722e-06	4.04679382473291e-05	4.65886270408226
AC009237.3	2.89072571168264	0.00071199176957049	0.00255817716735386	2.94044493335308	0.00056616099556768	0.00161631880539397	1.75713301036058	0.042859297238638	0.091591776314764	2.70162800494812	0.00152184161274748	0.0043032702597436	1.00425991495194	0.158118016331109	0.25768864735252	0.23542293586517	0.794240085146298	0.948823857522026	0.219936013007484	0.807011015686641	0.960357925606244	-0.752964037062203	0.449448619333103	0.639502840338859	-0.117156539589714	0.903062980927926	0.999999999999893	-1.28223597915166	0.21057748393498	0.334838543395046	0.981349973689727	0.279922109059644	0.427352759398522	2.88286169230906	8.94802384042266e-05	0.000223484374899914	5.86680467953594	4.25264774653106e-10	2.73289681221688e-09	3.80179357155636	7.23701118784153e-05	0.00020904454194232	2.86828908268287	0.00339132113233016	0.00792226201991485	0.83353349024108	0.398841605987839	0.603906816105637	-2.74258783440721
GLB1L	0.234514345711534	0.554241702117688	0.78005231136893	-0.226961327572882	0.567762806416663	0.772302741517077	-0.434189786109837	0.27395557366747	0.444656545144153	-0.00321688572841888	0.993519349781711	0.999999999999901	0.166634740982039	0.593753835610963	0.788279677140519	-0.526906123337603	0.183105402227503	0.292177391454759	-0.667351576544826	0.0945379103845977	0.16509007341066	-0.981913397371387	0.0151519739320836	0.0326342630879767	-0.705162331766112	0.0796335873671228	0.14254080206369	-0.892175680614355	0.0264239429061765	0.0529229506491015	-0.551196938074391	0.167629197014727	0.273961995648132	1.16825531818301	0.0004721217078203	0.00109093329748458	2.03760576172269	4.86269161735437e-06	1.91728983769972e-05	2.7920926517694	3.73874225070283e-10	1.86192815895504e-09	2.73740902888022	8.19737147886376e-10	4.06789158878775e-09	-0.11549987226893	0.809853494875335	0.983875560347364	0.638633404822397
MIR6825	0.814135102425224	0.0271020916871406	0.0668557890764772	0.248959642338405	0.507338232570306	0.709045196004952	0.823590816314788	0.0236470462756168	0.0541951154685028	0.558544305795547	0.126733354942009	0.230685703804696	1.85260268103775	1.49367071712779e-10	6.07917228735833e-10	1.59975230135852	6.10843845218606e-06	2.05111407224487e-05	1.62396761440627	6.14432169249729e-06	2.08941492605393e-05	1.41212114141919	0.000136686740670967	0.000405342551892881	1.86349718634017	2.97377655579059e-07	1.13028454555015e-06	1.81748693644667	4.83628377246116e-07	1.86796023352206e-06	1.96261926251895	4.42319343221784e-08	1.74720836107034e-07	3.46203601047583	2.17847255086365e-30	2.07349973334036e-29	2.62668580948579	3.16794963989629e-11	2.28195103772134e-10	3.07599562195926	1.28521507206594e-14	9.14431053542056e-14	2.74903205746176	9.0886233534141e-12	5.33903781179628e-11	0.135765567720152	0.755617549712907	0.953061498912942	-0.15486140634943
AC131944.1	2.85656262395012	6.60425536296488e-06	3.3946160019627e-05	7.28562692677627	9.22871736063883e-31	2.17025155511027e-29	6.97018985504663	2.69151378939938e-28	7.43938191163595e-27	3.02300451773546	1.81405924626919e-06	7.83705348930779e-06	7.94164699145388	1.32532318001722e-56	3.44271122590937e-55	8.44045368319	1.0299316538606e-40	3.04901370209295e-39	9.77476914863669	5.31415380744505e-54	2.96153873418824e-52	7.46227675339807	3.44125368845056e-32	7.31708855698545e-31	7.30525967422349	6.43587635561393e-31	1.2016264482614e-29	7.7399102668765	1.66763033985071e-34	3.84825864013327e-33	7.88792272367269	9.01387386719019e-36	1.86815818585086e-34	5.88993204820343	5.19378244961169e-28	4.55093954918744e-27	4.50126440161486	3.08840510697862e-10	2.01748181411117e-09	7.8035053381297	8.95475965088434e-28	1.50602247158735e-26	9.28628161745786	1.22284907092779e-38	3.96759357392567e-37	0.62257483210024	0.416111965303429	0.623936796655496	0.744864557578101
AC116563.2	5.30688337691105e-07	0.999999541372192	0.999999999999893	1.0590899346755	0.201669289447826	0.334694772651033	3.22407807461434	1.37484002834238e-05	5.74211480272404e-05	0.121528752124602	0.892226428696087	0.999999999999901	1.44943424544713	0.0342511621305874	0.0641355957886431	1.24259721510153	0.12089891289497	0.203410076639713	1.47716989110903	0.0690922062315433	0.125115011119621	5.30688344738643e-07	0.999999541372185	0.999999999999901	1.50718840202684	0.0740714698214521	0.13356761775966	5.30688340253846e-07	0.999999541372189	0.999999999999893	1.20299552296474	0.152969368720292	0.25296869416795	6.34862412043694	1.03286887286651e-21	7.06901039664829e-21	1.76764949371778	0.0393448976606114	0.0779357668538535	0.825293518966076	0.376909466058871	0.532494008155581	3.173111577997	0.000143820606043491	0.000409967105733244	1.14565509898758	0.26860462291221	0.443065843925832	-1.06137604879199e-06
AC093535.2	0.960873105898305	0.0936301085507819	0.194562970157192	1.19317438108129	0.035532942486346	0.0726565087243529	2.36263879618882	1.70596050925155e-05	7.03978829173719e-05	-0.0433747891244303	0.941694585628413	0.999999999999901	4.3914221910277	3.96692727601516e-23	3.08282116406823e-22	4.70241722470554	2.31481068958542e-18	2.08518319343231e-17	3.91716852643046	4.98999075151148e-13	3.20176180690893e-12	5.45743807886493	4.02745130196392e-24	5.64219910039863e-23	4.85879994806811	2.4226123863708e-19	2.29746920889375e-18	4.90937605264648	8.95835757495251e-20	9.19126708879305e-19	4.7804312794632	8.3703867944124e-19	7.09108091779529e-18	3.80416903114311	6.81636566138574e-16	3.54364253014312e-15	2.16201058516783	0.000503426079910369	0.00145811033072976	0.803135734303952	0.230935922651148	0.352936719967074	-0.648127004749441	0.373465136464341	0.540592194373931	2.45112843386543	0.00495243904430981	0.0132836501695567	1.34425181180669
SLC17A5	0.0649112383761918	0.751704518919241	0.949738140829032	0.864532170274348	2.25771908691604e-05	7.78921941312242e-05	0.679683754878187	0.000850891890061906	0.00264867085409254	0.758479621330952	0.000200263992202559	0.00065945337609356	1.35133167458494	4.26104945843635e-17	2.49785483941087e-16	1.56594525004735	1.19836874477327e-14	8.41711794553759e-14	1.63429334944231	9.03938521819091e-16	7.10995416519592e-15	1.14457133154584	1.94436011587929e-08	8.73950305569864e-08	1.12871545604906	3.09020195860601e-08	1.28961807508324e-07	0.961113073764288	2.3894468443424e-06	8.60685531387845e-06	2.54116660114314	5.73135963732961e-36	1.198629743781e-34	3.27210134047159	1.05549229124521e-80	4.25270187608631e-79	1.27140083135326	3.45211114147831e-08	1.78933190943926e-07	3.43515282444308	1.22924748102924e-50	6.60998154830084e-49	3.28483460657574	1.92683704257206e-46	9.30759352383479e-45	1.70703284377129	5.80390334844209e-12	4.86615162354205e-11	2.18023227013188
TNS3	-2.17265378327758	1.99635713870777e-11	2.00599706788213e-10	2.02369519894582	2.48608279616368e-10	1.45188075695794e-09	1.6554271274891	2.26407776885295e-07	1.19122568018831e-06	-0.381187859440018	0.234561863655339	0.388391217587448	1.76896774805774	2.19109400920985e-12	9.96264629350617e-12	2.07410817887404	8.67778822116219e-11	4.56024605781943e-10	2.38686377091119	8.3105234470212e-14	5.67082734804283e-13	1.25490210368916	8.78983273097663e-05	0.000266753572593917	1.81869014132133	1.30147336216249e-08	5.62056109055308e-08	1.3428114328603	2.69834838494144e-05	8.62102689614332e-05	2.59017189261699	5.41720273247912e-16	3.83276799441586e-15	2.86562748427312	3.08079864471381e-26	2.52068058417085e-25	3.12696836395179	6.07397610411242e-18	8.04873348427205e-17	4.93803800037862	2.52682472300478e-42	9.18866324658402e-41	4.99801139419003	2.56718343809828e-43	1.05841130553378e-41	-2.94277406619411	1.82947848199969e-14	1.92470100343473e-13	-1.64214918658858
MTUS1	-1.57566262596418	0.00126846865929261	0.00434665607972471	1.64836711361946	0.000645064663435046	0.00182595312565647	2.49374966642509	2.38774468683609e-07	1.25239559270749e-06	0.445473128116414	0.357162246737421	0.548702936495356	3.62156725425043	1.70603164267234e-21	1.23544438584687e-20	3.58130208728747	1.14579844393945e-13	7.48894853785747e-13	3.6166456143723	6.63668152462799e-14	4.56211731406607e-13	1.7899889103206	0.000211081724336183	0.000611063488249501	3.34643340029004	4.09837752164363e-12	2.36871478025058e-11	3.49036676823342	4.72613969934085e-13	3.04526887161047e-12	4.9975837662956	3.80951066141215e-25	4.65582261810232e-24	2.35316310025944	8.39374905385432e-09	2.88170969754274e-08	1.03628446625293	0.0585608763428102	0.111156365462033	2.06085543051075	0.000167545691090118	0.000462031021499604	2.9931043816471	4.46892262010931e-08	1.88555544721845e-07	1.86038698005845	0.00140668490591429	0.00419598224934788	2.09178553217845
AC023194.2	5.02539225463021	4.03497959311655e-10	3.54209869987078e-09	5.39743642928168	1.73568123305528e-11	1.11976671494509e-10	3.01848959855064	0.000260254087235507	0.000889681742563588	3.66544020990421	6.62948618908751e-06	2.67039832979207e-05	7.47573094367968	1.58260215066063e-26	1.41795539416139e-25	7.73220571628555	2.61386285961972e-22	3.04089437490103e-21	7.32403063491641	4.07919926277946e-20	4.2581593858099e-19	6.45921737358788	7.30317888140527e-16	5.88304199883792e-15	8.84125155166952	1.16323789185948e-28	1.92529321295607e-27	6.8690539593086	7.87700121054121e-18	7.13628512048974e-17	10.9288907644607	5.65014278348417e-43	1.61342595552231e-41	11.1753915830047	1.43403691867937e-53	2.86614971521056e-52	8.29603487404766	5.52475793259034e-22	9.95399823030844e-21	10.8546492009254	1.51035291298174e-36	4.07771662632603e-35	10.9261856716254	5.206541020728e-37	1.53887165340387e-35	2.94271265168892	0.00220424227736255	0.00633575468271723	1.59403228081479
AL049629.2	-0.834139031493132	0.00882191590016239	0.0247944809529345	-0.255707185296444	0.421145151704387	0.61363458005953	0.345415367143971	0.276350704797344	0.447790142786503	0.135110296445859	0.670476784896803	0.879729121322946	2.4633636187604	5.77342087144442e-23	4.45731858359714e-22	2.59806435084322	2.39632668508352e-16	1.88790734100236e-15	2.4241256245483	2.02153290610168e-14	1.44613444641906e-13	3.1704791303881	1.43564318358488e-23	1.94092699048495e-22	3.19106874621319	7.436495037055e-24	9.38743228394888e-23	3.2418605776582	1.42635567524467e-24	1.96204901081924e-23	3.44255315834922	1.67739941346126e-27	2.29600571101759e-26	3.70497186006588	1.80714681160332e-43	2.66525210892434e-42	2.98713563372674	8.9500324551634e-17	1.07413114626589e-15	2.96174648295522	1.63391857801017e-16	1.33389887632194e-15	3.00808063610228	5.49225698319934e-17	4.83682896872468e-16	2.61694820719228	5.9601334690072e-12	4.99168455871301e-11	3.2581541577104
AP002991.2	-3.40321379610477	8.42513492949204e-06	4.25781639739398e-05	-1.49792516111984	0.0106804370381753	0.0245180704654353	0.0426809909870465	0.935202137963855	0.999999999999893	-2.56489467132796	5.94440411251578e-05	0.00021101391365284	2.79397986149931	2.76407035273156e-12	1.24956069424847e-11	2.30742647979553	2.82652224842833e-06	9.84358248547326e-06	2.22091461999559	8.26521695975514e-06	2.77013330557913e-05	2.33457269816011	3.47427408222187e-06	1.24452799303405e-05	3.44716504463574	2.94718909489927e-12	1.71829636232729e-11	2.61048190508965	1.59283816476415e-07	6.43579645787051e-07	6.79561087325471	3.2914328873991e-44	9.90152257849234e-43	2.46909117663135	7.24669713842426e-09	2.49840859954142e-08	2.28052062456884	4.49343691934807e-05	0.00015419378427895	3.62252691199863	7.25713811457353e-11	3.8519514451308e-10	3.6413163850943	6.06554270838745e-11	3.31250788935274e-10	1.93529524433022	0.0476431350009408	0.101283472909066	0.985033430594764
ANXA11	0.943720033492552	1.44648622178466e-07	9.40634218866214e-07	0.919047816768916	3.00689427597018e-07	1.28878696448259e-06	0.793611922813941	9.66109572226479e-06	4.12436672962152e-05	0.948337703778544	1.24043601369383e-07	6.1706716670518e-07	0.807261459796327	1.11354218266672e-08	3.97753315100006e-08	0.864826662299347	1.3948492784013e-06	5.01755524541376e-06	0.683538213226904	0.000138944094933561	0.000400306295665345	1.34151701861333	7.34726574317219e-14	5.13062016502913e-13	1.29809242649226	4.53356653159139e-13	2.80230413835099e-12	1.32228842971955	1.63321602203118e-13	1.09275106561879e-12	1.33789549473506	8.45544320065537e-14	5.18396899803932e-13	2.27635934618172	5.7843284768331e-51	1.06683576124432e-49	0.413839626657398	0.0419493851293008	0.0825331582339589	2.48958076908802	1.46108187876318e-34	3.52067021535569e-33	3.18265607714812	2.04197780168925e-55	1.4706500209301e-53	0.29910692826453	0.164503729696298	0.295069780887185	0.638883210475555
ACADS	1.31719277789394	5.32209523792535e-05	0.000236204327872316	1.55214771111912	1.87712194990968e-06	7.36730386068812e-06	1.88352965172667	6.90192538580637e-09	4.30340878365015e-08	2.08476198621472	1.44421389143591e-10	9.76120700998032e-10	1.50612356321369	4.65051339200304e-09	1.71050864387091e-08	1.19429112668009	0.000239433220968244	0.000660475775427514	1.06775532152904	0.00105430388908678	0.00268519149301295	1.76367861652864	6.02685003450041e-08	2.58179965213327e-07	1.83733676575278	1.66292402961043e-08	7.10487901471673e-08	1.97867075623042	1.17093793075657e-09	5.74427199451119e-09	2.67579675426067	1.79465667780275e-16	1.30821168588536e-15	2.58519056819554	6.14266549318662e-21	4.07841421824763e-20	1.29734689036932	0.000437257607126019	0.00127932230477057	3.39447902440756	2.69549820747429e-20	2.83010915810302e-19	3.3804736134669	3.83939738792291e-20	4.22024018125264e-19	0.457180018879661	0.2429335020266	0.408320873727246	0.387124260021167
NPC2	-0.634662915719616	0.00399050974374513	0.0122434209382495	0.122247859727373	0.578709973190278	0.783375892909845	0.062140649546108	0.777691509942656	0.956298673485424	-0.367729820258892	0.0950099831357328	0.179512649742042	2.69656545298355	1.0714655020116e-54	2.62750512481905e-53	2.10208723714199	1.15348824874167e-21	1.29011993193944e-20	2.2263152389636	4.25591720852537e-24	5.74257972463034e-23	2.6836256136579	2.88327550379878e-34	6.78039309408158e-33	2.84963656853327	2.01649069732629e-38	5.26841654146028e-37	2.9791664245082	7.71705996115813e-42	2.53322280323298e-40	3.80839434183157	2.99937642130468e-67	2.23902524116931e-65	3.07031878973599	2.82048792561758e-61	7.05763001387491e-60	1.83617136202965	1.75061482619845e-13	1.58352631697887e-12	2.33953423502298	6.17817178751621e-21	6.75515772113496e-20	2.85841564314739	1.84823045963383e-30	3.86382389548722e-29	3.12398255074442	2.00318500773528e-32	8.17136875737405e-31	2.83326488882147
AC027088.4	0.125954476471835	0.843265218257574	0.999999999999893	2.27465037290112	0.000111746479783416	0.000352150649287503	3.48834444431017	1.41562384576332e-09	9.52154686064672e-09	1.52826059436654	0.0102648178927268	0.0246678938807131	3.84356278959219	7.30190329528241e-16	4.00536820355337e-15	3.75609529744773	5.57997124866704e-11	2.98056481020065e-10	3.73944110011855	9.16610187340708e-11	4.9320561281682e-10	3.79966210008951	6.26110841627042e-11	3.49652040429749e-10	4.27577291239574	1.30730835696713e-13	8.41440589427117e-13	4.31333441429857	6.71902497440059e-14	4.63067672477036e-13	4.71245126050615	2.03724222882484e-16	1.48080418234326e-15	2.60482805957249	3.63750654811224e-07	1.11045905145083e-06	-0.271662154652728	0.714449097038683	0.896353274093865	-0.95364105047886	0.217186461101217	0.33452012240346	5.06098152094061	2.54428479790969e-15	1.96642835358444e-14	-3.39561600958963	9.6258435279077e-06	4.0324225853829e-05	-4.92251741984068
AC099518.1	0.77214084354814	0.308930884728509	0.510083127754224	2.38778306203559	0.00055937843895273	0.0015985592974219	2.68252017044556	7.70880990831366e-05	0.000286477109306122	1.18196430779709	0.110250727512076	0.204453074254998	4.38714053366734	1.0698887971633e-13	5.23018011812324e-13	4.48518452019018	2.99963034997743e-12	1.77168643369302e-11	3.80444709264401	7.90289667639488e-09	3.59224601510289e-08	4.51387864557177	9.54296673498256e-12	5.70255626771231e-11	4.65405872292651	1.77160937268449e-12	1.04816522967807e-11	4.42222079614734	1.97043768665724e-11	1.11804882888442e-10	4.60745049525783	1.72325645478777e-12	9.63132114239732e-12	3.7865870935318	7.20874883768112e-10	2.6598739154393e-09	2.50539814145236	0.000734413259078689	0.00206696826447898	5.02805903248818	4.45351885643556e-13	2.81411308044909e-12	4.41066450952141	6.81040145933484e-10	3.40112854439903e-09	2.13328634375098	0.0140543887382959	0.0342598390355499	1.53030484632045
AC016876.2	0.0219318036086784	0.909345061215999	0.999999999999893	0.725283538822357	0.000165333139633146	0.000509762251480285	0.733631727119565	0.000138761984000211	0.000496154707305878	0.362506712750148	0.0597488438759652	0.119490277195802	1.37633120624178	1.04636140006938e-19	6.97447486252489e-19	1.316474746907	7.95498113413505e-12	4.55122770433489e-11	1.47705832242944	1.68412164983936e-14	1.21247234064115e-13	1.01167418156035	1.48362263319847e-07	6.14025304891425e-07	1.6052293372923	7.52184444330352e-17	6.07055127231041e-16	1.50078414056161	6.37330281164377e-15	4.72763355706056e-14	3.17259028815947	4.7995493415336e-61	2.88766915793538e-59	2.95283845788223	1.32435312376508e-73	4.51367350647418e-72	1.87023647432049	1.03602694257833e-17	1.34816599521639e-16	2.4109753328051	2.23063228252167e-28	3.88918624531379e-27	2.74972223817584	2.07753040728298e-36	5.93712787419065e-35	1.5709827373858	1.11668009290916e-11	9.10243616026748e-11	1.35080299647551
DUSP3	0.746881597604909	0.000820090040109375	0.00291552594450565	2.03037346137724	8.16595098009473e-20	9.97000370419289e-19	2.32943180616994	1.37411788646425e-25	3.28155746223013e-24	1.11509905187225	5.72531427112148e-07	2.63762502130438e-06	1.62320045477091	2.43512504618122e-20	1.67591709982594e-19	2.02779970112703	8.66096159189561e-20	8.57112714985201e-19	1.95850464021617	1.50550623360386e-18	1.42767796585217e-17	2.14841690871933	5.34603104770948e-22	6.51722681126136e-21	2.09262248488389	5.98535769118016e-21	6.2912848522091e-20	1.97275104621095	8.48504087694701e-19	8.16309319560786e-18	1.91627278534137	8.00977575432218e-18	6.35696279842209e-17	2.30600695243458	2.0925198555946e-34	2.28844225019313e-33	1.6661075123638	4.21795011105313e-11	3.00073467234719e-10	1.80781286042865	8.31355159107362e-13	5.14768195672086e-12	1.60284779860859	2.24692068545453e-10	1.17113531811668e-09	0.0313328801513079	0.90704405407442	0.999999999999823	0.474712524767706
NPC1	0.402248037877057	0.110512962343082	0.223070711998981	1.13664403637904	6.3139001888861e-06	2.33592576548365e-05	0.942133173275721	0.000181417852112935	0.000636154337484871	0.193410937464868	0.442851974355217	0.649705160605511	1.52684692827678	1.33217974220597e-14	6.84065040617714e-14	2.03176715351255	6.33797045108167e-16	4.84721967794741e-15	1.78912536303078	1.13250480657124e-12	7.07329309338549e-12	1.6384480047433	7.38960873194867e-11	4.10116502054329e-10	1.96354612849111	5.89024568047929e-15	4.18528181722022e-14	1.84997715209039	1.9001697351823e-13	1.26402362738778e-12	2.64022436703814	8.44729578634005e-26	1.06550466511767e-24	2.16991542348473	2.0083347955061e-24	1.53739607093715e-23	1.71602711412715	1.74785349640094e-09	1.05195232535617e-08	3.05680447645298	7.37377648963877e-27	1.17379731928363e-25	3.01894310191278	3.07056121345112e-26	5.02378740335354e-25	1.56996253644857	1.89432723244345e-07	9.92483756421153e-07	1.50619049426889
BIRC7	1.88217616154321	0.0364462633680275	0.0865871419159842	2.02471546817484	0.0240821521935589	0.0511897854751956	1.7702905919971	0.0488020799349943	0.102725540300759	1.24885984561389	0.166482770930731	0.291162770824407	3.95058005141149	2.93313412397387e-08	1.01724855430142e-07	2.44967925860604	0.00594812023130736	0.01328202095504	3.88137280996261	1.2417539448874e-05	4.08260474247524e-05	1.03175710513398	0.269771748790888	0.423910758974195	2.45535560647362	0.00665042104077012	0.0148077274901182	3.30863949260801	0.00021033880485467	0.000598432459490457	6.72302632891615	2.83939951415027e-14	1.79730793899491e-13	8.11603485776909	8.23714953022089e-27	6.88754622928128e-26	1.98027838770482	0.0508329284269255	0.0979450063956655	2.82568162561462	0.00531250234529337	0.0117142441213731	-1.0970181609998	0.318101400902539	0.471187529475563	1.49732429101519	0.192401452517574	0.336136822715166	1.95663084945192
APOC4-APOC2	5.20439157657305	7.12567293538743e-12	7.50658814560429e-11	7.7174717450089	2.32993818573263e-24	3.77069588017546e-23	7.08862714218913	8.43975196308091e-21	1.47361073462915e-19	7.03812143169584	1.59697773906766e-20	2.39017958452722e-19	10.7046441364078	2.55325744133784e-69	9.39883488312846e-68	10.3206104169055	2.8613992031804e-42	9.04078795920611e-41	10.5349586276059	5.72628091402377e-44	2.05946012382209e-42	10.5415095093696	5.08068809394037e-44	1.85205821528393e-42	10.6894599511332	3.24315668454003e-45	1.14668407415881e-43	10.7763305936312	6.31871992149515e-46	2.44653584370218e-44	10.6091724983342	1.44718683418685e-44	4.42508019785844e-43	6.99121902689476	4.75042326166052e-27	4.01853910990578e-26	8.27501514825198	2.87065616486799e-22	5.29065691870103e-21	6.27033069387933	2.10021471264957e-13	1.36267909366161e-12	8.45546887098433	3.54366795123183e-23	4.80245374296357e-22	-0.537171737479186	0.634869449775831	0.840838002553158	-0.809593322565462
TRIM63	5.50729880274869	1.17152252277073e-09	9.79108446711274e-09	5.6702306540066	3.58873279095616e-10	2.06516501661816e-09	2.954682244452	0.00142455643997957	0.0042525134324643	5.43902394356479	1.77852637167943e-09	1.08067650015387e-08	4.63986178639735	1.56849325875659e-09	5.95351653896792e-09	4.45888408358453	8.7334457435434e-07	3.20825463967516e-06	4.11457545993451	6.98269867924018e-06	2.36024095598411e-05	-0.11982107662139	0.911241842273033	0.999999999999901	0.373603636020729	0.721507690844118	0.88318894332542	0.950994894119439	0.349493660798907	0.512734705731969	1.56674980085704	0.111319434447492	0.190898149550785	6.36048852410855	2.02076834369862e-15	1.02405276700981e-14	0.0332034227899748	0.977615625697601	0.999999999999876	4.33183044329402	1.75225742713256e-05	5.45000578708663e-05	2.77384923946823	0.00761451173047084	0.0167545789470116	0.322604417138774	0.802776655301137	0.979719910342838	1.06417906173945
LRRC39	0.571818707338625	0.093044344315135	0.193541577894845	-0.195658890211136	0.567493731740589	0.772016825622574	-0.102065929349772	0.764620742399274	0.946796424680574	-1.03143587923591	0.0027545215148153	0.00742391738556722	0.0420331466710585	0.876019109336238	0.999999999999831	-0.264320089714364	0.436778795747694	0.606856062922311	0.123071256637223	0.718342558707225	0.887593159272129	-0.49836545345409	0.150297130921243	0.256829274906502	0.801612832665635	0.0185343348426616	0.0380737714704418	-0.52944611459009	0.125101508032005	0.213341631824005	2.48573146999473	1.83277116610373e-13	1.09737145213437e-12	4.51179664077257	4.1775532338108e-56	8.965100045745e-55	-1.00921902812756	0.0102690025127816	0.0232474600324842	-1.45924229606686	0.000399390912315233	0.00104400099002623	-1.18411499569864	0.00385952342194655	0.00894017899166443	2.58960749172673	2.55336549468353e-07	1.31673936541884e-06	2.77181664307361
HS1BP3	0.226606477124978	0.246653100672604	0.427542440991145	0.470286243249723	0.0159474161242263	0.035260277912844	0.692644840440126	0.000366783949691166	0.00122138703174254	0.362852185771832	0.0628443157422481	0.12493704115567	1.13682778925566	1.31187692558883e-13	6.38477720071057e-13	1.37822599111412	1.09583444429559e-12	6.69049597045447e-12	1.34165131792502	4.76928082986375e-12	2.83804184503628e-11	0.802966559442694	3.74731129025891e-05	0.000119130316143332	1.40030117582502	5.7231211583878e-13	3.51186118678572e-12	1.60730677330421	1.1567725564387e-16	9.6883803632083e-16	2.47704271708312	1.74756831687995e-37	3.92456463288923e-36	2.56345626659806	6.1533410118328e-55	1.2777454238839e-53	0.705697586534924	0.00136782627453642	0.00366766886383797	2.10041219856024	1.10015721095741e-21	1.26852462380333e-20	2.06860689689942	4.43310138391907e-21	5.1877805415476e-20	0.566565204592642	0.0154993795357886	0.0374115580547801	0.616049274091049
SULT1C2	-2.92645896215883	2.76547252788199e-08	1.96292450487696e-07	-0.289635383572783	0.56595500252657	0.770421875255882	-0.533164684669497	0.290662430183538	0.466151327988721	-2.00236442271878	9.22412826131178e-05	0.000319169353636935	-2.15767057532249	1.09740994845371e-07	3.65220568379994e-07	-1.94470822886909	0.000133695379362788	0.000382496249462747	-1.84420750258959	0.00033638286596445	0.000920353414892441	-3.17387472384962	1.5292520396803e-08	6.94661554281671e-08	0.39119837585276	0.437810049970339	0.611931392189872	-1.47615509829475	0.00420363184507803	0.00980335509582578	4.32717065768795	4.93858660282559e-18	3.98489157195133e-17	2.12987524910986	5.08859529665204e-07	1.53759917304599e-06	-1.21881364257196	0.0349891822166418	0.0701556721384078	4.23159643524209	7.93626380519771e-14	5.3226725634575e-13	3.99362242588328	1.78502202340307e-12	1.10964940501658e-11	-1.54427064993494	0.0184330586152844	0.0436408575486261	-0.38960003809516
ARL8B	1.20373937778132	3.94144076951435e-16	6.14664369856551e-15	1.63577529053407	1.55315740143513e-28	3.21897527761874e-27	1.03611894622101	2.31707762474204e-12	2.05852540455031e-11	1.01887384490581	5.47342103648672e-12	4.20998244232743e-11	1.63611844262888	9.45294629070383e-45	1.70314710261658e-43	1.32110471335521	3.17093339838688e-19	3.01944018268048e-18	1.7082398851442	5.30858389172124e-31	1.0409085066649e-29	1.4916777849511	5.46584490329215e-24	7.57374149260817e-23	1.61765149274737	6.26029103273866e-28	9.95011330799044e-27	1.59098804141353	4.22670346567559e-27	6.73833248761788e-26	1.91626732482553	1.33998565642265e-38	3.17585135512654e-37	2.19864521843717	2.81318631106478e-69	8.60366146800646e-68	2.1513685922469	5.24416891875401e-38	2.45922388017792e-36	2.00532397904975	3.48175573312537e-33	7.89385976919575e-32	1.80114369715434	4.49225412306885e-27	7.71038764517316e-26	2.89057196305012	9.24701901458545e-57	1.52727775241949e-54	2.75810721535046
ZBTB38	1.72189856003393	1.78783039411776e-14	2.41015252074602e-13	0.798499696500483	0.000393154004338119	0.00115232905064517	1.10745571007328	8.27681895961719e-07	4.05867431947926e-06	0.996453420987503	9.45548662041048e-06	3.73044820397289e-05	1.24062224316744	2.73964838136876e-12	1.23897269830059e-11	1.51817854748318	1.2804964726335e-11	7.21233003850957e-11	1.66206374859292	1.33453552921188e-13	8.95981778689327e-13	1.45045591160311	1.09527029488061e-10	5.99541812541133e-10	1.4898179358049	3.4248621117994e-11	1.83528317158331e-10	1.01316743364928	6.64986153502955e-06	2.28400719355916e-05	1.48837419590525	3.48785778586844e-11	1.77150508899427e-10	2.19497907258632	7.89471526501776e-31	7.62754195559117e-30	3.47867868925664	8.04393772452578e-43	4.75926717285436e-41	2.59848430197838	1.44414932224983e-24	2.0113605259296e-23	2.28029673684848	2.91136143379371e-19	3.02061769437266e-18	2.16403242619621	6.23238961532149e-15	6.81164711381169e-14	1.65909084039628
SPP1	2.18701818107442	0.000228878677177407	0.000903633826874216	6.15411328490239	3.32680734995793e-25	5.65452044762878e-24	6.15122244028453	3.50045947078696e-25	8.18570316938434e-24	1.68860849352875	0.00444304038138999	0.0114950929672407	7.28644373325161	7.41258304550276e-55	1.82589253316362e-53	7.48860180254682	1.61151525737378e-36	3.95303385116337e-35	8.93778323801651	2.80401558314863e-51	1.38548157102808e-49	6.29984909075434	2.46891877153e-26	3.91185744301411e-25	6.10616760535006	7.72629249122061e-25	1.0292354157016e-23	6.54578673545733	2.67354083592067e-28	4.53465165049855e-27	6.27576883615257	3.80617050459758e-26	4.88630270220007e-25	8.36747759177244	1.83781412674904e-62	4.72476823671734e-61	3.8789242822598	8.10359347635357e-09	4.52347178665714e-08	6.76042495775947	9.12115818310156e-24	1.20829095470849e-22	7.90069449493697	7.39982980259281e-32	1.65952960878157e-30	0.114584955127274	0.871634914806265	0.999999999999823	-0.252041968870332
AC116563.1	0.0471880261618668	0.958991778276936	0.999999999999893	2.67903154576117	0.000587486267391805	0.00167305270296384	5.1642255075134	3.87289448355627e-12	3.3691329045994e-11	0.901330487407698	0.291391526360975	0.465812369618619	3.07644588053214	5.75456693880989e-06	1.67448935473063e-05	2.19982590803546	0.00482767953910344	0.0109571314383264	2.52016933221505	0.00140263135493622	0.00350842786764206	0.45909816338678	0.61526001593312	0.808837176615197	2.40799054731941	0.00342410903120936	0.00799765814414738	6.40665021791844e-07	0.999999457700193	0.999999999999893	3.87892687034384	4.1724630929203e-07	1.50630666357954e-06	7.24619350431384	1.86839288410334e-26	1.54064842084496e-25	3.84130630100738	2.77574985413753e-06	1.13198024891416e-05	2.19294919806577	0.0115592152340259	0.0240757317377349	4.21893120522391	4.1813694302029e-07	1.60051271240959e-06	2.01904432587376	0.0495707993972692	0.104857635176607	0.487111449787509
GM2A	-0.26473045080803	0.329661093954393	0.536583890807473	0.445006679258551	0.100910426161443	0.183805658294901	0.815122805623309	0.00264204612733036	0.00752138449446781	-0.571586220934068	0.0353434718163896	0.0750151271192231	4.01442337450522	5.56824629299738e-79	2.67140932376544e-77	3.77778238477866	3.28478493594059e-44	1.1382156282683e-42	3.55948063673761	1.94910768190792e-39	5.72112778500799e-38	3.34018931614978	6.27886403792427e-35	1.52780427618969e-33	3.88953886381909	9.43658582372666e-47	3.59190978690875e-45	3.63756028819341	4.12499949358494e-41	1.30510784379418e-39	5.0002784920238	4.26449234728454e-76	4.32466013239402e-74	3.82935698110423	1.01097489067188e-62	2.62035999554596e-61	3.1229578746633	2.69290927173478e-24	5.73769806378963e-23	6.08919251862005	1.49734476877119e-87	3.10148016645113e-85	6.0931028814899	1.15887494682846e-87	2.59783642301378e-85	5.24504823631562	1.87541033763415e-58	3.36839384482222e-56	5.04498751257153
FRK	-0.509131859470047	0.440868561692711	0.664760158547669	-1.01704773343356	0.127861542548968	0.225805790139871	-1.0210629068168	0.125064736895835	0.231274779860185	-0.503588562678068	0.44241903662244	0.649286613225852	-1.12490566112245	0.0327716087922005	0.0615910690445884	-0.861603551118284	0.19019071620995	0.301909740269218	-0.93728196490827	0.15962384684293	0.26135541373318	-1.44510865414653	0.0408695167130822	0.0808878986932583	1.65709565251552	0.0103936894118357	0.022410384642454	-1.23310006224164	0.0760100763347225	0.137161935127145	4.81297705932518	4.74320206568661e-14	2.95217335979746e-13	4.05990843426548	7.57660844335787e-14	3.54087765269265e-13	3.54219363880474	9.51080262154438e-07	4.1296648625749e-06	-0.226899001156299	0.765152763632243	0.92130596698976	0.261512812232938	0.730126409546505	0.909070185635833	3.39335762703614	9.02086876722132e-05	0.00032790979450345	3.77388166898096
VPS50	0.511271484971373	0.00106320963034413	0.0036961166697502	0.696672067144767	7.68603953458177e-06	2.81451014690631e-05	0.970727507984861	3.45010967902001e-10	2.4734076628907e-09	0.0696781369026589	0.656336954415637	0.86792901710822	1.52599578203314	1.46327313149651e-35	1.89505927317613e-34	1.64978775852992	6.51944231006282e-27	9.94842217238703e-26	1.67528545332682	1.67811992293389e-27	2.78380298463927e-26	1.73384397496498	2.79086008728496e-29	5.17051991582672e-28	1.68392596290549	1.16106379701576e-27	1.81246432847434e-26	1.5349427961275	2.62131099192574e-23	3.34656398177287e-22	1.6486351901291	1.23592535836995e-26	1.61713327996834e-25	2.03316076198058	2.86449932387633e-54	5.83804558378434e-53	1.49629472071434	9.92113472331174e-18	1.29401439401712e-16	2.09681354596545	2.69271409234138e-33	6.13718370790994e-32	2.19837961071891	1.69277191703725e-36	4.87795259765944e-35	1.95115276668337	7.95320402163657e-23	1.67567126837666e-21	1.78814612712626
HTRA4	-2.29363784494187	0.00983496653836548	0.0273327242673866	-0.329536468685991	0.671910824576955	0.869604621073979	-1.51275855051015	0.069214607533395	0.139429844174804	-1.90050696447291	0.0262708597749097	0.057664048456834	5.22350091618946	3.57577425112732e-19	2.32001256647313e-18	3.07285149679118	2.33552192082109e-05	7.33278392132659e-05	3.31180300042586	5.54054350013175e-06	1.89381508431227e-05	2.28577422788733	0.00214792021917637	0.00538837489032244	3.23891377399102	1.00309215627803e-05	3.27366755465698e-05	3.3831536063953	3.6312556779918e-06	1.28169785893521e-05	5.59110928465547	1.09492686482729e-14	7.13524144312147e-14	6.13643597773541	5.0272002862298e-23	3.64193371043333e-22	5.16575329992365	2.125227374869e-10	1.41549533965828e-09	8.48726144352903	1.28336389695739e-25	1.89119045748846e-24	7.35874317271514	1.23802003758228e-19	1.31639407815448e-18	3.27898181230676	0.000861412917037537	0.002667359027342	3.80659522557722
AC110741.1	-0.0447697601362272	0.958707512639633	0.999999999999893	0.41065008718102	0.613250476866294	0.815585868845033	0.567286298806278	0.475256466939997	0.684170594850963	0.799034599493672	0.290756159347183	0.464992095674303	0.80078033392316	0.213910309913371	0.336828971603247	0.772943509274429	0.313977383633772	0.463530122032487	0.581450138297872	0.457379217418186	0.632344270142369	0.401956322619255	0.629701384139834	0.820322798454822	0.407154980749018	0.625260128541961	0.802442010735262	1.05289652609122	0.183843439181972	0.29804758680162	2.0166694673887	0.00560105532052894	0.0124073750524315	4.2675185086612	2.17763824355101e-12	9.36713661312082e-12	4.93389292782998	7.18637787335817e-13	6.11288703013265e-12	1.00586529984943	0.212770758323637	0.328451577828972	0.595093242110068	0.479183068113444	0.657312233539562	-1.20689141582625e-06	0.999999084907957	0.999999999999823	-1.2068914222331e-06
CD59	-1.27348109165005	6.55551842184045e-05	0.000286592340298452	-0.667037598930967	0.0363595827014356	0.0741680903270871	-0.197094229779294	0.536059429792752	0.747508170778458	-0.590129085527813	0.0640337161997065	0.127004098311878	1.97106559362529	3.64171267122502e-15	1.92777543103841e-14	2.21282113278962	3.59070153086969e-12	2.10690205182872e-11	1.94411650651716	1.01259178257197e-09	4.99613446535637e-09	2.62741078012133	1.52580873881765e-16	1.29419509245706e-15	2.70584999936818	1.88062729959038e-17	1.58041614927505e-16	2.74335876503825	6.74795308477774e-18	6.14049431449906e-17	2.98986061718148	5.78620968844166e-21	5.56453919003953e-20	2.93182846747779	1.20766894500417e-27	1.04321339567937e-26	2.46276134750344	8.80907322429627e-12	6.72410433334904e-11	2.34945900110507	7.49079977708297e-11	3.9702772247358e-10	2.34293532139245	8.44128357840241e-11	4.5589798450189e-10	2.87592818769878	4.81441747036331e-14	4.88967185653734e-13	3.60385479897205
FXYD2	0.140846347761835	0.838803953288171	0.999484961821087	-0.61628243907634	0.383882648857464	0.569967936561759	-0.647839137721337	0.358554066058902	0.551048230687935	-1.13971610237305	0.109803232461771	0.203752707432534	-0.199044848626243	0.719997983277056	0.904491529230446	-1.08992829476876	0.124150387595227	0.208163837058715	-0.613661961235019	0.389540038004798	0.556027627206649	-0.588245828856651	0.42383633369353	0.610258214363529	0.338863660081533	0.632930095335041	0.809030413025066	-1.18606183446798	0.111709647178953	0.193262108254916	1.85788873039266	0.00666249462624007	0.0146002017103883	3.83258671534893	3.12503604761866e-11	1.25911356935318e-10	0.813940962994559	0.297260796620639	0.45271599175008	4.29573407339032	2.12364130165756e-08	8.963850466558e-08	3.12650860240133	5.04352024625019e-05	0.000152409318925988	0.319265229903836	0.752390110741566	0.951658856667364	0.281477320216554
AL355315.1	-0.0463338059758063	0.870731715859322	0.999999999999893	1.24227553863488	1.07334544190641e-05	3.86172845379985e-05	1.19511359217685	2.23008475614331e-05	9.02677923101472e-05	0.809827470946189	0.00414764692767293	0.0107902616345231	2.16263793955118	2.39191485362653e-22	1.79896849943647e-21	2.5184392313079	3.08051367804869e-19	2.93680898991426e-18	2.64291284535683	5.41550612333735e-21	5.98228540087229e-20	2.14163499424426	2.78292001553003e-14	2.00593339161428e-13	2.43390870250615	5.16416092115365e-18	4.50488401537461e-17	2.20538274686609	4.54045987554169e-15	3.40765337052689e-14	3.62188301306983	4.79595769854377e-38	1.11108650264204e-36	3.06350408915309	8.05354696669153e-38	9.82369796905248e-37	1.35008829085	2.34823893166143e-05	8.38649664571785e-05	3.44246730875951	2.69388235128442e-27	4.4061058053241e-26	3.91757934657648	6.7600943387261e-35	1.80256418713828e-33	0.642585467551383	0.0573737409266575	0.119096651439292	1.43305172174171
STARD13	1.36923811475782	2.86808683768546e-05	0.000133123531445169	2.99127599938689	3.12897461260588e-20	3.94161169103084e-19	2.88803597416704	5.41048850230743e-19	8.2871350643157e-18	2.36678737384963	3.30547711663676e-13	2.85120978179511e-12	1.91830543836578	1.16659260536787e-13	5.6939241408092e-13	2.02653212550873	4.24437952722811e-10	2.10750739961615e-09	2.077016730665	1.75056200067121e-10	9.21335389603619e-10	0.682329183555222	0.0391447087817914	0.0778148679995725	1.54217407773809	2.47332323665049e-06	8.59883489583126e-06	1.44022860177028	1.05513107012451e-05	3.54287932609264e-05	3.80334706587387	8.32821459051658e-32	1.42102548284677e-30	3.84797803938291	2.8325696034889e-44	4.28105998622199e-43	3.29574507796704	2.3683139204258e-19	3.51540524073521e-18	3.04534481348573	1.16256506752904e-16	9.59686065548483e-16	2.48813405524591	1.53251835442216e-11	8.82839002637031e-11	-2.7320457297165	6.68439441198619e-10	4.57808813743644e-09	-2.08342733129578
MIR4709	-0.495792476343233	0.064103603393272	0.14089907000549	0.126269993330372	0.636473895737294	0.836748247275449	0.0464565049942912	0.861837110438467	0.999999999999893	-0.307284836074279	0.250457200209411	0.410467751244404	2.60354178280997	2.47288023930987e-35	3.181776858848e-34	2.08567111235485	4.72553861273032e-15	3.40719152352964e-14	2.20713350856704	1.16016283279513e-16	9.69434387818253e-16	2.76748859431116	2.66895594990292e-25	3.99089354450245e-24	2.91652521435456	6.4163159750542e-28	1.01843923962915e-26	3.13879576143739	4.38441867264501e-32	8.96566168137368e-31	4.17735597734601	1.63967586523508e-55	7.82209473658939e-54	3.61074373160829	7.9988913100571e-58	1.80531127134203e-56	1.44984302564281	1.5831840944981e-06	6.66682810758714e-06	2.1084800972686	2.88462011669171e-12	1.7090879119296e-11	2.72472185722117	1.73010228207083e-19	1.82278507573701e-18	4.68132785239196	7.06054012980184e-46	6.67037468222899e-44	4.15553711482305
FAH	2.45790262138161	5.67193023048105e-41	4.31441172781374e-39	2.64873468312631	2.28616320212619e-47	1.20466854658443e-45	2.69526932353105	4.85635827689746e-49	3.74836267852623e-47	3.03560082387724	9.39925056444559e-62	1.02403141340974e-59	1.83147965880076	1.84919738993786e-36	2.47715400360426e-35	2.04684628464059	5.03777921459647e-29	8.66000333858121e-28	2.02198045591484	2.89605993058365e-28	4.97129549404269e-27	1.86051460305697	3.92165835866947e-24	5.50021396880018e-23	2.20050263946785	3.80000103517747e-33	7.81116835938548e-32	2.5131085795443	7.95305328615861e-43	2.70856797460904e-41	2.89543605139953	2.5065684814091e-56	1.24359217590977e-54	2.1709057322414	3.20342144036306e-44	4.83434094960154e-43	1.49719756869561	5.97864710536866e-13	5.13298120526362e-12	2.39855318099703	6.98992487199097e-31	1.40621320763911e-29	2.98582303209436	4.50828073147674e-47	2.23613315247184e-45	0.140974045088345	0.525582202378431	0.749424248181295	-0.498998397812732
ACSM5	-0.38725320725362	0.644660905061547	0.861730917776679	1.77227295292536	0.0176435647841519	0.0386221449589908	3.38687095123248	2.24521465141087e-06	1.04059266570541e-05	0.0671901703725321	0.933542307758835	0.999999999999901	4.56509943174247	2.39005963277509e-14	1.21132400940043e-13	4.47348265398982	2.39374510215883e-10	1.21363202836945e-09	4.65283521718794	5.43980694184182e-11	2.98310601063047e-10	4.40414951206447	8.01572004879876e-10	4.08237972121017e-09	4.88116415702125	7.17710580805581e-12	4.06699792532549e-11	4.85575360888437	8.25683430727411e-12	4.83246291875489e-11	6.74840275043255	8.31976616243908e-22	8.40016799364779e-21	8.46091946764978	4.46249010098694e-42	6.23640379841569e-41	3.85665928867877	1.035078269314e-06	4.47253425711773e-06	4.61647722278146	5.51919242669526e-09	2.46082608430826e-08	5.84250625098906	7.69877299747328e-14	5.32975350438715e-13	0.318253037687312	0.783221212261076	0.971126870976099	-2.89963286751275e-06
SLC47A1	-4.14775538896592	4.71736385536813e-11	4.55879943608887e-10	0.98787243603346	0.0693073138682338	0.131660489072733	-0.943823148661515	0.0873802434072528	0.170055230629054	0.436702785014159	0.4226328670888	0.626700598268778	-1.40425893435014	0.00143416080347524	0.00327054191611913	-1.3268516876417	0.0162233970442456	0.033323753087953	-1.17131470154406	0.0359545403976448	0.0695658312406571	-4.19327461889351	9.38334924256289e-10	4.75288746503136e-09	0.439073967133873	0.423987154637465	0.596209848285602	-3.45483873501585	7.95920934108673e-08	3.30725872312556e-07	4.51627758431128	6.25173613895323e-17	4.6980772448281e-16	5.55344811575398	7.77638739554225e-34	8.3159399500556e-33	2.09087086742929	0.000651293720636562	0.00184968439271908	4.44910576237972	3.46994357837426e-13	2.2120409740115e-12	4.17120268636827	9.21560533914854e-12	5.40995002014657e-11	-0.610830503579446	0.371814235463961	0.572740684741855	-0.219895961808741
AC068234.1	7.8225358772464	1.86424109799046e-57	3.15631386185575e-55	11.4417302494125	8.51030430512194e-121	4.07593019952142e-118	10.3423784220705	4.69939000233512e-99	1.93030509165482e-96	11.3627227674844	3.6677340213604e-119	1.75662671104224e-116	1.68929071850446	1.47588236971554e-05	4.14289670070224e-05	2.86831685415145	4.91439828375017e-09	2.23299068363561e-08	3.38994506977897	4.82521984741864e-12	2.87062304365e-11	1.05359248317658	0.0338369972922208	0.0681345822760103	1.34465574164369	0.00661915934910249	0.0147443756565856	2.65393913043858	6.57647095039993e-08	2.75499076165344e-07	2.4470595996624	6.46901254172611e-07	2.29821932785633e-06	1.77525884164963	2.15778312172243e-05	5.7081788447508e-05	6.49910456125231	8.33591072723577e-32	2.86612718731556e-30	5.76296901444287	2.40063931174787e-25	3.48604333932249e-24	5.9966173613155	2.58658863976704e-27	4.50071638215915e-26	6.57009891349303	7.63227864207292e-21	1.36821990973662e-19	6.84380531031603
LRRN4	1.60144471290229	0.00288239916205558	0.00913123795976255	2.13935238471706	4.9668982720908e-05	0.000164092180109171	2.82675841737775	4.65426823501678e-08	2.64788231503658e-07	6.58550733504316	8.0650375716924e-39	3.46474300582128e-37	-1.34103657454228	0.00813798064373924	0.0168233636597985	-2.16815810083281	0.0051646395146048	0.0116666249761828	-1.47623225134454	0.0269680893262814	0.0535938287243831	-2.16815810083281	0.00516463951460483	0.0121648296849579	-2.1681581008328	0.00516463951460491	0.0117126159081757	-1.76339641982188	0.0172859899844334	0.0358996838379722	-0.411695084825228	0.522513381693676	0.709230030099	1.72194639318798	0.000258994847984262	0.000615621770827003	3.6165197602433	2.22612350907097e-10	1.47977754614002e-09	0.245027580431768	0.712199579175523	0.881850070486092	0.192965045282332	0.776276109449586	0.951722560210903	-4.38523871059619	8.79015904480334e-09	5.36807682998546e-08	-3.77987229047542
MFSD12	-0.300291917594058	0.245249387372653	0.425788198740151	0.25203153010406	0.328869123734933	0.503366223339764	0.398512218912395	0.122380592842439	0.227056538902677	-0.0256597760985433	0.920831494753799	0.999999999999901	1.43963884155531	1.33292116200685e-12	6.13101631848025e-12	1.46197808379151	1.39596389356481e-08	6.09614168307397e-08	1.47561598525585	1.03727294404494e-08	4.67492817686442e-08	1.37389620147633	9.88369921022015e-08	4.14984968228434e-07	1.48710660529711	8.0145340601252e-09	3.5348510307949e-08	1.68229140794488	6.70533599447015e-11	3.64697704514435e-10	1.57797122904793	9.24524284287661e-10	4.18902334243603e-09	2.59852706837182	8.92834362581118e-33	9.19261824096022e-32	1.51948388505585	1.98769111639016e-07	9.40564367753863e-07	4.77574070769552	3.73172825759715e-60	2.95474135111855e-58	5.30281040613546	9.68073349965473e-74	1.32268449290929e-71	-0.020126978559549	0.947954446647331	0.999999999999823	0.219476168726414
PLA2G4C	-2.82250344552843	8.22802548769009e-07	4.82936431364335e-06	2.05586768753847	0.00024491916151589	0.000737746721465108	0.63611723148284	0.256858360337113	0.421643674146657	0.318908794815381	0.570005341634988	0.785663723918202	-2.9272739752512	7.74885711730027e-11	3.21614271719888e-10	-3.43817379473541	1.84030016977158e-09	8.65035857665541e-09	-3.38920244782086	4.88273546867186e-09	2.26194754669665e-08	-1.85115550272779	0.00116668942250425	0.00304698560818475	0.593584204277937	0.290556027439878	0.438198951280985	-1.54628739363387	0.00637749203293396	0.0144037098331198	0.217065575158423	0.699260832312834	0.882684278632309	2.97015500388645	3.68716148439888e-10	1.38623695745576e-09	-0.148900633867618	0.815263425123685	0.981688811907137	2.7372913435055	1.63917962664603e-05	5.11550886558255e-05	2.042883000576	0.00130889641067133	0.00325733289281975	-2.69683195976304	0.000314267831877138	0.00104538325791147	-4.25381872627548
RAB42	-3.33111084921032	1.48871494406407e-09	1.2300582090739e-08	1.25723617760338	0.0167803091494257	0.0369145433846546	1.23787373222596	0.0184790153379462	0.0434967733465499	-0.198954994155145	0.705958937611394	0.908290393122106	3.55378786789336	8.74171222459961e-18	5.30080727436805e-17	3.45940047072879	4.23872754272093e-11	2.28635110865343e-10	3.82436656002912	3.0930310475682e-13	2.01480192383539e-12	2.71965515905656	2.20493856208515e-07	8.97127538596562e-07	3.66093209985879	3.00253163248851e-12	1.74926722649062e-11	3.78647059406108	5.27710041426095e-13	3.38964362616868e-12	5.54808836004445	3.7149471703174e-26	4.77045764453845e-25	4.99780958699471	2.13058286864729e-29	1.96049236855942e-28	1.74628000773053	0.00334740331561274	0.00834930255220501	2.50914983925928	2.48582163580583e-05	7.60191943346915e-05	3.30375724746144	2.76098010570768e-08	1.18984547947621e-07	-1.06248758854293	0.0946001980740404	0.184068441587653	-3.25752627749092
SEC22B4P	1.15580296912739	1.62046849902026e-08	1.18547422159238e-07	1.01021976757787	7.61530761586162e-07	3.11706951516394e-06	0.751266326463769	0.000229842072332566	0.000793064278361829	1.00882892981031	6.61922984286893e-07	3.02181960352113e-06	1.77027933671097	1.08706162017554e-27	1.02928873353435e-26	1.44504797261634	3.45466583879088e-13	2.1876233881376e-12	1.44732712494558	7.16340405571882e-13	4.53554115690166e-12	1.37568097332918	1.82853782009163e-11	1.07357519081554e-10	1.75224687801212	5.23123277281231e-18	4.56002477374673e-17	1.21531405007289	2.73571744503909e-09	1.30033291357729e-08	1.84961148081353	3.66543592956043e-20	3.35683703560444e-19	2.44750175912544	2.76545664580468e-46	4.42106430818889e-45	3.39687822823608	1.10180272169456e-53	1.09201371121218e-51	3.0488949894108	1.50828329278799e-42	5.54711887432105e-41	3.08774530251703	1.3185258920611e-43	5.53748793743714e-42	2.37013337925187	2.12456309958393e-10	1.53288509447146e-09	2.42325282956556
EMILIN1	4.48974385431613	2.56095998140485e-17	4.41021023119289e-16	6.58938047193439	1.87420552043038e-35	5.61715883765668e-34	5.5174414500249	2.36352379788793e-25	5.56559190632265e-24	7.05064709836054	2.41464718458018e-40	1.12853843729176e-38	-1.04407289913827	0.0132761780446665	0.0266114480282316	-0.912996169786408	0.0867465345909356	0.151683582718258	-0.675914268282165	0.20621143864653	0.326238419729481	-0.853253181933574	0.112344172601934	0.19934795720162	-0.810927225578603	0.131335422637733	0.221821058321602	-0.680889304924463	0.203590011021206	0.325332957888819	-0.999695432585304	0.0625228927835141	0.113841227561145	3.78923409066475	3.15613989355142e-17	1.75577615387528e-16	6.90734361124458	1.3588845584971e-30	4.33388333436045e-29	6.19177842085031	6.62927987827941e-25	9.37166256994111e-24	5.77469052771254	7.16032060339792e-22	8.84712197102731e-21	-2.44346785862889	0.000154976247064372	0.000542122884049338	-2.46773482465754
LIMS1	3.26330369165495	6.22462317358765e-48	6.6074724685564e-46	4.89011742555739	2.09827505040707e-105	7.30214813045621e-103	3.84183929416169	9.14210188561267e-66	1.34113498997107e-63	5.06994820248763	3.64965962241269e-113	1.56234499924751e-110	2.80259548379896	1.47762774464986e-56	3.82429834110607e-55	3.02176610169056	2.2644509124252e-41	6.86760401170811e-40	3.3418637380103	3.41841945874643e-50	1.59613131735464e-48	2.20524913925363	8.76169064930261e-23	1.13051283483253e-21	2.24981627476612	1.19843464503864e-23	1.49289180716482e-22	2.19098739407716	1.62106881992231e-22	1.96748272987334e-21	1.61177621734874	7.02786775698883e-13	4.0360803396512e-12	2.40997240407509	6.58301808542171e-37	7.8282116448525e-36	2.56779788810691	5.55828505058235e-24	1.1589333251206e-22	3.20853366057832	1.60963300547896e-36	4.32546060834026e-35	3.51651543205953	1.5610967583831e-43	6.54031338506086e-42	2.95789635762842	5.23645287852558e-28	1.61142882490497e-26	3.88203689864765
ATG7	-0.294442082217797	0.0925559483571392	0.19271236093561	0.258382491068754	0.138666740974395	0.242523908494989	0.330190893083016	0.0580253277356028	0.119660456048488	-0.0160821729708811	0.92660908247055	0.999999999999901	0.424266380543647	0.00201486620510904	0.00451577749677034	0.538477805824916	0.00194920068664253	0.0047139628444635	0.720068065162388	3.53608064225788e-05	0.000110163475821434	0.637320076547134	0.000254787224101927	0.000729869436324927	1.05628720246061	1.29612468963514e-09	6.11028362917116e-09	0.802074154345618	4.06733929452254e-06	1.428892653989e-05	1.97387200884626	6.37556139014734e-30	9.89111709831936e-29	2.32944281029792	1.70169747854245e-56	3.68939086037076e-55	1.29240412615204	5.37409450585593e-11	3.7875924066738e-10	2.00124587657346	2.82029496262749e-24	3.8544031155909e-23	1.9745594064567	1.11775313110616e-23	1.56815525299567e-22	1.38433920580522	4.34340748161995e-11	3.33175607679898e-10	1.69922646252359
CPB1	1.36957955862552	0.093057852504298	0.193561152740886	1.68806854985691	0.0372935838400192	0.0758908977785221	0.392062188099885	0.654999649144484	0.857925311297637	0.79325485854814	0.352043498482636	0.542389405105601	0.313787980215575	0.659554793101633	0.851016818546204	0.826749509328801	0.328100356215474	0.480449927200318	0.866128957083883	0.302084553295019	0.450704339539201	-0.108755479737722	0.907983415417304	0.999999999999901	0.7372444478304	0.408242581153417	0.578235526415111	1.03527532572336	0.235596603220838	0.368140150391754	4.88709271185955	6.55314048056191e-11	3.26228853823167e-10	5.66967511937166	3.09093375668619e-17	1.72063564564881e-16	4.40950646790472	6.36339744072796e-08	3.18994978504512e-07	3.97438212392208	2.01413581999125e-06	6.97552134608126e-06	2.54559358627186	0.00345128740642046	0.0080514491042335	-9.38871141639154e-07	0.999999351869822	0.999999999999823	-9.38871144201895e-07
ABCG2	0.0467931262330777	0.939174427543907	0.999999999999893	2.15656352852247	0.000349090169419923	0.0010303837708707	3.39960689387758	1.54248456730818e-08	9.28182719820847e-08	1.38423015870266	0.0219836083197565	0.0491933702757822	3.8048858081825	1.38137240551868e-15	7.46323976098162e-15	3.47873083237567	6.92792922539905e-09	3.10703430762311e-08	3.38674082695835	1.77573256441045e-08	7.82807904294422e-08	3.30995645338375	3.77188231503165e-08	1.65000238040356e-07	4.09359355075138	9.62696581029057e-12	5.39185420892454e-11	4.05826778577398	1.42416489741842e-11	8.18409699018903e-11	4.79112102001061	1.47047358964656e-15	1.01211182344868e-14	2.80448979666447	4.11749485975509e-08	1.3489530025691e-07	2.00605066906437	0.00330511923345483	0.00825277664534601	2.78965720290846	4.45049519166668e-05	0.000131940225860237	7.14735816346457	5.85454590697697e-26	9.43854142904696e-25	-3.44746249555623	8.95473671077281e-06	3.77000800362545e-05	-4.227676754309
AC131956.2	0.312109817446403	0.737759281597296	0.938531056361399	3.50839709519915	1.75207546055252e-05	6.13397598996215e-05	6.03601721242646	3.73163733204819e-14	3.91540099186939e-13	1.52946771844848	0.0757416543062284	0.147201729359389	5.52639387550648	1.93534276080044e-15	1.03814469588289e-14	3.82841977648044	2.13011729085324e-06	7.51514577422828e-06	4.16008554555249	2.87286035401205e-07	1.13065555206757e-06	1.18871916564225	0.197534888004421	0.325122665445317	3.10332977936288	0.00026749581132389	0.000734975549063902	0.65260332052809	0.488271954623308	0.667820086299945	4.83183870407156	2.21256708828086e-09	9.73960394589224e-09	6.91329873432057	8.32356971092892e-22	5.72066103378621e-21	5.23610147032304	1.98169271594203e-09	1.18480473724e-08	4.00267255404409	7.33661788089784e-06	2.3842857018108e-05	4.87510435344857	4.585280686282e-08	1.93307489845918e-07	2.64051600559053	0.0155186086614706	0.0374464914866105	-1.92695392091135e-06
ATOX1	0.447620751502028	0.017797444124629	0.046154151419989	0.880948621230235	2.9453807249776e-06	1.1315773315014e-05	0.608998398080728	0.00122355566618069	0.00370280600956995	0.638963079471834	0.000701115711984852	0.00210065471265675	0.65432165687729	1.08618787119941e-05	3.08768718441488e-05	0.61027932512638	0.00116826636909133	0.00292220637427246	0.517192009087349	0.00609510669320622	0.0137178893626048	1.11382166508642	3.32307796053016e-09	1.60027128108239e-08	1.37967865440894	2.29216031647436e-13	1.44713681995856e-12	1.22375992428033	7.78383760693442e-11	4.21126030281481e-10	2.48563393220895	5.00773345247132e-40	1.26495608509867e-38	2.36199063957424	7.58130761100959e-50	1.35198206079997e-48	1.54882978613273	3.47373994421083e-13	3.06339949877245e-12	1.42005320278259	2.78226248276733e-11	1.52895997182575e-10	1.40021013526345	5.21414845024846e-11	2.86841866779152e-10	0.222079187710457	0.328828539386988	0.518921381586315	-0.141452396534708
STX7	1.09312028165416	2.03156192087812e-08	1.46937514096647e-07	1.53910245039264	2.68295062338193e-15	2.35882171037539e-14	1.20881856617681	5.35788956223916e-10	3.76622960195672e-09	0.915419475564714	2.62327520124686e-06	1.11097611022513e-05	2.15497906645732	7.98422791549027e-45	1.44272667271474e-43	1.90163090718492	1.40084801426984e-22	1.65883037929682e-21	2.0534711685124	4.8823045863186e-26	7.4525629458501e-25	1.64968506213397	2.37770706421505e-17	2.13468492608156e-16	1.66227816003386	1.36637546659406e-17	1.15835387500904e-16	1.70949987540825	1.58453398129953e-18	1.49967204317062e-17	2.23266531107539	1.73055479235199e-30	2.76368857611234e-29	2.3799794937403	2.36425291162305e-47	3.91179199484028e-46	0.783247650189809	0.000390650875011407	0.00115377328060577	1.62235346966312	1.95109198438924e-13	1.26910433648572e-12	1.41584849620749	1.4118352649765e-10	7.48761424890187e-10	3.7298469211094	1.90729860385144e-55	2.99319150000434e-53	4.16221161683304
DOCK4	-1.0272401106444	0.00156710512565114	0.00526308886031871	1.50724183793832	2.63495585026459e-06	1.01732555946084e-05	2.21508631354079	4.74480813076779e-12	4.09221292081574e-11	-0.460717110795399	0.153297858698381	0.271301259240361	4.5303871599523	6.38554611379105e-72	2.53126319967901e-70	4.94539559871593	7.3874352975147e-54	3.8549342788207e-52	5.0602406595057	2.71143220978063e-56	1.65815562937697e-54	4.55328167509522	6.57949481828674e-46	2.64563510261832e-44	4.84455922037461	9.6993438450012e-52	4.56797512668317e-50	4.51433727219712	3.68064880134765e-45	1.37658596539397e-43	5.23450725565788	4.08252516263054e-60	2.36224868052544e-58	2.44620606133054	1.94610338834707e-19	1.20300686203132e-18	3.42158679102471	4.00189101866818e-21	6.80361774190898e-20	4.04884871585732	6.15772860469647e-29	1.11064319169975e-27	3.22019685479211	7.02360567018374e-19	7.08835261000048e-18	0.772030074087677	0.0441364357972491	0.0947023764594439	1.39058441211608
ATP6V1H	0.239637846254267	0.0931864912471332	0.193777526282833	0.599353297060727	2.53042095788828e-05	8.67929185250867e-05	0.562121724141001	7.52804495830662e-05	0.000280332881115908	0.241709111180137	0.089851490529211	0.171023300203412	1.34723108941745	2.58633868071993e-33	3.07522128773114e-32	1.50890854173222	1.23493895077305e-26	1.85578446305513e-25	1.38326721607175	1.55570368448395e-22	1.88801791818802e-21	1.69074819048015	7.07524106127777e-33	1.55497790030527e-31	1.67825992976637	2.13444972734327e-32	4.23634461220647e-31	1.49097050057309	6.18946083411515e-26	9.23764807017684e-25	1.78798527184418	1.29370389837957e-36	2.79002847420039e-35	2.8206502754906	1.63712209016989e-122	1.69557638811338e-120	1.9991145699682	8.08106135213607e-36	3.41061194366903e-34	3.50537585861799	7.49540406785358e-107	2.87507043589379e-104	3.23675703218274	2.42016599911921e-91	6.23499780758158e-89	0.616948709829021	0.000329599268786426	0.00109189148325019	0.787387471438863
LINC01235	1.00581525413539	0.242062952880293	0.421371156589269	1.54744968932786	0.0682185299584308	0.129811374441571	2.47946506400177	0.00243040804409732	0.00695915528756896	2.05935680406173	0.0125172047982036	0.0295137605060887	11.6788909446698	4.35805430099258e-67	1.51418685260662e-65	12.6890994996942	9.92173718407568e-60	6.48573233520666e-58	13.0026825812121	1.26394800472224e-62	9.52351352530049e-61	12.2448701863657	9.71389393275413e-56	5.75845822560191e-54	11.9475888895977	3.77842308074724e-53	1.88470296795414e-51	12.2681699927979	6.03033736913779e-56	3.60120159678839e-54	9.75969088915216	5.05299951833979e-36	1.06088865321463e-34	2.30434593591007	0.00186226560093111	0.00402201721214316	1.66506248964342	0.0738401280280457	0.136695194243307	1.16645821842423	0.217630999352688	0.335105145390432	2.43188020796363	0.00811094586748827	0.0177638692956339	1.89469186481271	0.0866224210996437	0.170419962744018	0.814367824498363
ACP2	0.204639529428012	0.473610575566024	0.699888714469334	1.49439374961346	1.52208128929944e-07	6.72828641206998e-07	1.2109074560583	2.09245837712961e-05	8.51200967623765e-05	1.11218377996959	9.397612420318e-05	0.000324846866948723	1.5515884527282	4.64698349131129e-12	2.07332431862948e-11	1.21897501629414	1.81568419587558e-05	5.77639537041036e-05	1.1807435785538	3.36429988616908e-05	0.000105109654713981	1.55012410597216	5.15254455169997e-08	2.22320968334121e-07	2.15345184881186	3.71880755698592e-14	2.49737436123605e-13	1.65049556698431	6.59580679913769e-09	3.03345463704476e-08	3.14404423627418	1.90884354378541e-28	2.74892791734242e-27	3.41040971760889	1.28702405021599e-45	2.02116651309268e-44	3.12637630802025	2.74981549792898e-22	5.07533366283204e-21	4.52680609396086	6.29605436323101e-45	2.59576897365598e-43	4.21242656350226	3.91618930383183e-39	1.30664968247631e-37	1.11799213768664	0.00102743141776612	0.00313823329330864	1.48372615895574
VWA5A	1.94497588948038	1.53072995358704e-08	1.12430003152026e-07	2.98377167327046	3.85154869769296e-18	4.1980839376634e-17	1.23333926466273	0.000333939429862331	0.0011206519500147	2.66496836882752	8.82789121044697e-15	8.69363968898516e-14	-1.43634551935936	1.23755112005698e-07	4.10232950623603e-07	-1.68575349151602	1.00412183061032e-06	3.66556375459307e-06	-1.6617503098552	1.52817157242251e-06	5.54805189678732e-06	-1.7158806077275	7.21265338447839e-07	2.78227816720393e-06	-1.0636512331172	0.00206991676298474	0.00500289900394545	-2.19557836079022	2.46227665794765e-10	1.2774361613561e-09	1.53178489506661	8.35990007812795e-06	2.67438295403269e-05	2.2818544322099	4.12979225720101e-15	2.06086765847081e-14	-0.66039453233942	0.0910126950000242	0.16428149773422	2.13769198377836	4.1032474013754e-08	1.68714038578229e-07	2.38519003896587	9.22023774114088e-10	4.55975141772036e-09	0.712142979814638	0.0856783908594646	0.168766529712211	0.725071441819859
PI4K2A	-0.30822939458755	0.244971598004415	0.425337182053023	0.899655246973134	0.00066123401879964	0.00186811547666131	0.812711491692625	0.00208674079494372	0.00604250444006355	0.378935086385787	0.151788589817555	0.268994338190379	1.74557483941526	4.72538857978271e-17	2.7625305700038e-16	2.05920668805697	5.73176688303987e-15	4.10942284620257e-14	2.16475887948098	2.2754721284149e-16	1.86498497573388e-15	1.71239049435987	8.68011870692816e-11	4.79045501665985e-10	2.01363635065219	2.32348271471225e-14	1.58329995664834e-13	2.03272331754799	1.30416290651941e-14	9.47328051903083e-14	3.1487470704098	7.09433535022236e-33	1.27242967703488e-31	2.6571702210999	1.09893023887081e-32	1.12893348636614e-31	1.02642658250067	0.000604817900784443	0.00172669714786521	3.06964938619733	9.32002029226259e-25	1.30755516335474e-23	3.53416273500194	2.71851586357882e-32	6.23993381931304e-31	0.637198418544806	0.0436056948548189	0.0936784704319211	1.39636760800611
FABP5P2	-0.0241158025766223	0.960079268421317	0.999999999999893	-0.920039247537554	0.0591862862768789	0.114378899207841	0.0253445130876139	0.957840419881656	0.999999999999893	-1.14961237297236	0.0181824482061596	0.041411533832881	-0.153335065283092	0.687068049230565	0.876750167793659	-0.829987350399544	0.0848657050623172	0.148825723280868	-0.739432140722011	0.129340074889345	0.21796089331553	-0.07181074281269	0.882809567838281	0.999999999999901	-0.632590889966948	0.201501069263955	0.320978822716039	-0.0272598688335466	0.95514433743614	0.999999999999893	0.0798893509807701	0.86852874619432	0.999999999999901	3.12839743411567	7.05512480547541e-15	3.4793441309577e-14	1.66659684783645	0.00195091533192519	0.00508497030007119	3.08912797716121	8.69804114874645e-09	3.80446545152071e-08	5.44653042741525	2.33518152653082e-24	3.43432845749347e-23	1.73534755199107	0.00993630539033296	0.0249952741358589	1.1124994252435
RAB42P1	-1.96236156102108	0.00553702915245456	0.0164017515962324	2.06912207442037	5.03278311790403e-05	0.000166121335900629	2.33822868757919	3.55264909869983e-06	1.60651431624817e-05	0.455971380905611	0.400233749548317	0.6010339987241	4.29122246518372	2.13813798623147e-25	1.82551043001045e-24	4.17834904789313	1.34063772779116e-17	1.15105908424639e-16	4.74411816209689	3.76657945446375e-22	4.46789475112248e-21	3.68835478489287	1.71940176974702e-13	1.16963326969445e-12	4.79111656862847	2.07607887722544e-22	2.39189604691459e-21	4.53454819798996	3.13709534385723e-20	3.30332083722211e-19	6.48517498182384	1.92064567111049e-40	4.93925534548791e-39	6.82775667378924	7.60103202542435e-57	1.66722333460217e-55	2.61891565203185	3.01556170837977e-06	1.22425762150382e-05	3.48460427699207	5.66734179286125e-10	2.77462380693707e-09	4.47755448316124	4.45874806856832e-16	3.67947970095097e-15	-1.50998644425299	0.0117433225908892	0.0291359488011888	-4.08513274693075
SLC28A1	-0.0373417930905548	0.962163204721324	0.999999999999893	1.13349031279318	0.129498968631079	0.228405659213563	1.47973823193467	0.0447053260338348	0.0950765605267775	-0.171411599738149	0.827011175706782	0.999999999999901	-1.25079440856465	0.0552855171891848	0.0996556319056952	-1.76177097291683	0.0555249824772586	0.101831588465743	-1.14860767645452	0.173838119026511	0.281541158821127	-1.24830014942372	0.160244408214456	0.271505399576531	0.143328414133651	0.859417482713528	0.996791883218387	-1.08311219619808	0.211285639618517	0.335738546057788	3.7642523576058	1.53505932362362e-07	5.76159409230644e-07	7.02372706609693	3.07513972454217e-30	2.91436239687804e-29	-1.24467400270017	0.194276391728438	0.316682398953282	1.06390487806097	0.213900398593818	0.329978977578684	1.44109389723018	0.0917970204867553	0.16082025549312	-0.325015890030009	0.777183868723493	0.966329773022338	0.797285980720239
AC009021.1	-0.492814781465416	0.41918937351105	0.641342467732681	-1.53540670464696	0.0255874200170207	0.0541088641959931	-1.05580822446461	0.100472042319657	0.192021276220005	-1.88926330343268	0.00755517999255248	0.0187016027929455	-0.970804520524482	0.0510743104925909	0.0926991527108277	0.27950496337573	0.623932830640792	0.800781651727148	-0.46038011492078	0.453943625112189	0.628484357810811	-0.855924095273229	0.209746555640859	0.341929367978137	0.0673006222312245	0.915328580375964	0.999999999999893	0.361822512440661	0.555291947408411	0.740384038605937	3.18103574370728	2.2006602140448e-09	9.6889539031573e-09	3.87109145392726	3.12558086703379e-17	1.73954031419553e-16	0.779955187488007	0.221523054965613	0.353525591645213	2.71927743033732	7.09439676863687e-06	2.31137000044245e-05	4.15603475689386	1.897322283357e-12	1.17621261581558e-11	1.41984842013186	0.106304242755734	0.203612582720485	0.887081555358301
AC025627.1	-1.88984204150514	0.0243080097212409	0.0607179660093202	1.33243168399001	0.0554917205547364	0.108028855376459	-0.700391700199047	0.357843264783411	0.550206441591498	0.852984128758391	0.222976510562312	0.372546637567716	-0.865676891024903	0.149008446628846	0.244370891057993	-0.166424774891597	0.819755052301696	0.96597899452773	0.154714812146046	0.832532435628362	0.97895112812122	-1.62623501364713	0.057620696609725	0.110068721586389	0.515744441823355	0.492440382797398	0.672372712515918	-1.34551189307186	0.105515963306857	0.183676944233711	4.75602292116163	1.15912305667064e-12	6.56253038627442e-12	5.85540393797834	3.67775631476636e-24	2.78629239069046e-23	1.80586724084551	0.0196473993280304	0.0417672173592776	4.59224907628702	1.04299817871904e-09	4.97005380404972e-09	4.50199982279222	2.3464173075565e-09	1.11472043520365e-08	-1.27866388081961	0.187543358499508	0.328902380747772	-1.31773884523831
PNPO	0.320893145732841	0.244791477183697	0.425102570042509	1.00623083597826	0.000254612327781853	0.000765229085541572	1.75274497886863	1.69406942928701e-10	1.25427519798167e-09	1.37231638226113	5.89019904242183e-07	2.70920032593963e-06	1.83406940995235	2.53960884506945e-17	1.50458984717283e-16	2.36199484169764	6.8369836135787e-18	5.96546551839182e-17	2.32458529137891	2.36626072036886e-17	2.07135595053208e-16	2.15763288480335	3.78381650696834e-15	2.89428456501549e-14	2.43627545685794	6.71648811270421e-19	6.22335717888993e-18	2.28078374141136	9.23726244559684e-17	7.77929338817361e-16	2.1289454926125	8.61170448929733e-15	5.64616401817267e-14	3.26159224408482	8.17675732776805e-45	1.25757683456465e-43	0.997218014259577	0.00136938721581487	0.00367127123668202	2.3955475859444	1.30232312027494e-14	9.26221647262703e-14	2.81759304880932	1.19055307343045e-19	1.26722322305137e-18	-0.162250618596502	0.629064629498599	0.835050124683334	-0.386294713266885
ASIP	-0.595293351168885	0.391893480643759	0.610268093399132	0.389832105246768	0.543288038390634	0.747379001275638	0.744209214870587	0.229163581667607	0.383769989975281	0.163605893066081	0.798585244993883	0.979496632953124	-0.0770523197568171	0.884372447847588	0.999999999999831	-0.138363757432739	0.833476746742392	0.975246786862612	0.67129808815342	0.269331111533045	0.409807361959924	-0.329368068647109	0.649824239585356	0.838730667097028	2.33193491343202	9.24691609830485e-05	0.000269195473767796	0.693380085179486	0.298635573984821	0.449671626926812	6.16859032847441	1.29189489515301e-31	2.18048959397196e-30	4.12004889725263	1.88025424901312e-17	1.05585271865527e-16	2.34545290000746	0.00015479438285835	0.000489401105827079	2.31030848392968	0.000325424029541097	0.000861393064546675	1.03576101094784	0.141407918368276	0.235640425965066	3.08328242855278	0.000266831035926347	0.000897933863649843	4.20425669228286
DNASE2	-1.28402183647251	1.9818537807793e-05	9.45529007601977e-05	0.306850438066275	0.30552441121584	0.473568711347853	-0.243370010977967	0.416477815739163	0.619081206560225	-0.913211898747854	0.002349096654068	0.00641015696097657	3.23750620584875	4.97625547370204e-43	8.39166841820374e-42	2.946777541995	6.07290688109597e-23	7.34044789003637e-22	3.11616006454537	1.85470311507655e-25	2.72366587084389e-24	1.38565256760724	3.60582198364947e-06	1.28935856604876e-05	2.90178064939452	2.75674323528568e-22	3.14922080302756e-21	2.72419352964157	7.84573342762566e-20	8.07602767314782e-19	4.94277064482531	1.76905584360243e-61	1.07776496627935e-59	2.74133775686549	2.13742971086225e-27	1.83044073615708e-26	1.43437833915967	2.31988108257381e-05	8.29340702393121e-05	2.70364458428764	1.45498745593183e-15	1.11159066731364e-14	2.20814522739965	7.19446911638743e-11	3.90924652942172e-10	1.25379252040306	0.000468402064161002	0.00151640794357983	1.31482496409919
PLA2G4C-AS1	-3.10760400272004	5.20621323857508e-06	2.71591269741105e-05	1.79909761657839	0.00297194053544245	0.00756321967176755	0.290785704317497	0.634304459363167	0.840396032506042	-0.110514601046792	0.857019605379424	0.999999999999901	-2.98708772144767	1.17617083451422e-08	4.19367666625618e-08	-2.88834243347752	1.45759275742812e-05	4.69272109517938e-05	-3.15123742735085	3.53840213184076e-06	1.23512141956655e-05	-1.12920931015769	0.0846612792055753	0.154967270557055	0.815676503286003	0.185210948226522	0.298624758896003	-1.26910499121592	0.0513853901400867	0.0964397343576333	0.256791210465864	0.677532592929322	0.862594660291357	2.8454513533671	2.84265537976372e-08	9.40482913270927e-08	-0.661658088496717	0.350374593913348	0.517892589403906	2.80346086510463	4.27830598625332e-05	0.000127170379935799	2.06284412424005	0.00277352906545835	0.00656796339674532	0.0374418079947944	0.972394256278463	0.999999999999823	-0.591326658849448
DIO1	0.444781762250692	0.398964982688811	0.618710075090983	1.06529899240595	0.0348421908836489	0.0714161567633369	1.8093498092288	0.00017734990569589	0.000623302842132476	2.20446074653673	3.27682617112129e-06	1.3706001934773e-05	2.72246996145061	7.92327340999913e-12	3.49384743322468e-11	2.66486316052184	1.00358800310468e-08	4.43590665882516e-08	2.58124783046825	5.33396715809244e-08	2.24775671520521e-07	2.99400501477226	5.01283835459254e-10	2.59343347301289e-09	2.90281970563761	1.96711310853892e-09	9.12685609547716e-09	2.98167729597654	4.04490645993386e-10	2.06226925469936e-09	2.84199901197108	2.44702270021572e-09	1.07248191607805e-08	2.42185394012059	1.047128128664e-08	3.57316070639517e-08	1.18703971194609	0.0346983358676185	0.0696248779061572	2.72754369002074	4.82979932808181e-07	1.79223507332108e-06	1.86767158310192	0.00121318058953169	0.00303298075931634	2.54613922207318	0.00545313536233321	0.0145014780786204	3.56315287845047
TMEM79	0.337173000454804	0.165688353209024	0.310765167382754	0.797308831479005	0.0010112006280137	0.00277216253776744	1.17240081208183	1.24649540955173e-06	5.97712959709626e-06	0.785349744883339	0.00119454292332131	0.00343888739093149	1.04358098943636	4.79489472173227e-08	1.636564404851e-07	1.15653879115599	1.6713191641084e-06	5.96038940765375e-06	1.12282537853633	3.50337225720986e-06	1.22368854211865e-05	0.897696701033396	0.000213845757840803	0.000618644868371099	1.46030124347204	1.60508356032728e-09	7.50835137048722e-09	1.48544294464988	8.06665107248352e-10	4.01564334187906e-09	3.56365573637324	1.91021346831366e-49	7.21896532052629e-48	2.94175358277584	6.42138484063589e-47	1.04706199819332e-45	0.714747330671695	0.00925097985173329	0.0211390148696483	2.62242280127938	8.54862514688123e-22	9.90764225561662e-21	2.54292819207871	1.38972368607096e-20	1.57643070396084e-19	0.793914033720118	0.00682666459609799	0.0177954392983765	0.874315217539367
RASGRP3-AS1	4.52813769642871	7.63022153794823e-24	2.14796647668689e-22	4.74883179605686	3.57472564653828e-26	6.43304329241057e-25	4.45000688272079	3.47110904199518e-23	7.11961692647531e-22	4.78761365851667	1.19093234971055e-26	2.54569025861902e-25	5.74163276614046	3.49721569947018e-53	8.16363255523187e-52	5.78362887101348	1.75643725576716e-38	4.72548049906701e-37	6.08559167329851	2.56691160711757e-42	8.48150376851765e-41	5.19083222211066	5.75406703585187e-31	1.15590317576936e-29	5.21959691942413	2.80240435829573e-31	5.29720586926032e-30	4.89300784989476	1.1410576640769e-27	1.87870829132104e-26	5.22866182109905	1.85809524195698e-31	3.11656175933374e-30	4.69748432109442	1.31938969000433e-32	1.35349018108081e-31	1.55326137135555	0.00359070466975316	0.00890266944261607	4.61373896761755	4.38668985465461e-20	4.54039497788486e-19	4.90749706213549	1.21286641170265e-22	1.58640720882037e-21	3.68667875755065	4.27990381375113e-07	2.14049567443263e-06	3.99143512546951
DPP4	-0.695970044376558	0.42733051669697	0.650319737266744	1.26070603218509	0.149520736773008	0.258765933237477	-0.180451772244781	0.836734512240949	0.998404267826758	1.55333957296694	0.0756894680407589	0.147112127834122	-2.80512037682177	5.60829395338677e-05	0.000148646810452962	-3.27940852003828	0.000213526516938793	0.000593206880535276	-4.86897635885965	1.10559757066353e-07	4.521947348077e-07	-1.54074480711466	0.081077060856443	0.149219672975258	-1.89153281379229	0.0328454689426935	0.0641363075708327	-1.77476838184411	0.0445186899738082	0.0848468573045301	-0.738974527620786	0.399897403880717	0.575105158696692	4.3749815171282	3.22985515225623e-09	1.13928990138717e-08	6.75322333935316	9.25182756870206e-12	7.04719595494788e-11	3.28129844272154	0.000928408855623566	0.00230016725375605	3.09857823648691	0.00176757289861619	0.00431398853111087	0.349242627789762	0.739691176848955	0.942613362490938	-1.40135448696325
AC099541.2	0.0475723551019508	0.957425874384139	0.999999999999893	0.166346282248652	0.851741101331463	0.999999999999901	5.91411653121732e-07	0.999999485381811	0.999999999999893	5.91411646714879e-07	0.999999485381816	0.999999999999901	0.736681529484318	0.290872036481315	0.439628957757689	0.854101692250515	0.29601228734585	0.440811159822263	1.61961572311907	0.0417300610293715	0.0795259914972142	0.453610936117531	0.60918894703614	0.803750044710005	2.80816404743587	0.000324495841462843	0.000881184826857162	1.763847785677	0.0307818278810568	0.0607724318154928	6.39960378743881	1.61694577175569e-19	1.42419005493696e-18	5.19165591543754	4.06447884854427e-15	2.02887439151757e-14	1.61786532479345	0.0590085017236186	0.111913742446614	3.10632269782536	0.000128554216196599	0.000359872579592847	3.45146800466599	2.36222369651159e-05	7.41351695008847e-05	-1.18282255536029e-06	0.999999138879235	0.999999999999823	-1.18282255151618e-06
SLC31A1P1	0.109722542085701	0.693347675664131	0.903170159659394	-0.222934254318211	0.423856512997047	0.616916235992362	0.433216458118479	0.117049578627478	0.218554884094558	-0.216181386857587	0.436934087897776	0.642777587551825	2.28566146928664	7.60461453901001e-26	6.61708383903207e-25	2.13732278254474	6.75192993291612e-15	4.81798357641174e-14	2.22358789373464	5.88582268770073e-16	4.68050141167429e-15	1.66531642153623	1.48595143479822e-09	7.3935330956073e-09	1.6659470210914	1.49045111070871e-09	6.99150338793916e-09	1.2430579265575	6.5270491883806e-06	2.24410963324503e-05	2.76400249154764	7.77034359242659e-24	8.84203318269704e-23	2.20774165786593	2.8781168067e-21	1.936563090104e-20	0.903747481526949	0.00384366906277693	0.00946867373672847	3.52778644105191	6.41853303384166e-30	1.22646087118606e-28	3.40002617406194	6.70871921783056e-28	1.20875994174294e-26	-0.60241183418521	0.0672097927271987	0.136773607576025	-1.0084467867335
HPGDS	4.09658176728796	5.46591536916568e-08	3.73597806819967e-07	7.80225701716381	1.64837195749045e-25	2.8579461182683e-24	7.93693147065271	2.36801608161088e-26	5.94041293930182e-25	5.80019518731294	9.32229392220807e-15	9.15984588974686e-14	10.1002302111961	2.2630488458083e-61	6.73352232000089e-60	10.7343120565745	7.78337640977255e-47	3.05357069805294e-45	10.7860517046426	2.88051430560541e-47	1.21059182020027e-45	11.2227496661659	5.01580660733542e-51	2.49876017524857e-49	11.2087584689349	6.65751724199433e-51	3.02968344855574e-49	11.3248387358335	6.29142134180745e-52	3.21631893856016e-50	10.2356292798397	9.75387420395657e-43	2.75598222469621e-41	9.88757407740835	1.31237755330426e-52	2.53883397878715e-51	3.68575883409619	1.29711428378004e-05	4.80701782771991e-05	6.50059675983362	7.70389700892552e-15	5.58023358250371e-14	5.74979378475582	7.57674668211646e-12	4.48191310760837e-11	-0.150801323958863	0.892954223016391	0.999999999999823	-0.982665355097191
FCHO2	1.05310069406952	8.88913330213111e-05	0.000379207071067251	0.807209829270575	0.00267909603769442	0.00687110506502265	0.524408509589724	0.0509931707665036	0.106747813316966	0.547168663667433	0.0419061803109343	0.0872445732808619	1.82539370215315	6.29527530061758e-18	3.84701771672275e-17	1.360901807214	3.80351904283607e-07	1.45203714512753e-06	1.41783525003811	1.26201713934239e-07	5.1326345284521e-07	0.711273033596964	0.00818836343445996	0.018561185773905	1.04617403412884	9.9257416303451e-05	0.000287875150360786	1.24525603105267	3.4941326662875e-06	1.236717703862e-05	2.85879426396709	1.35821432053052e-26	1.77522024660964e-25	2.65136503789246	1.52790098966408e-31	1.50930512039257e-30	2.14099322647884	1.7626343822114e-12	1.44240395736756e-11	2.70353242039207	5.25726610353864e-19	5.08189304908608e-18	2.82875328718483	1.14801833466106e-20	1.30913528790473e-19	3.41614759304901	2.52894146072704e-25	6.478286755985e-24	3.31911625756935
AL159166.1	0.66672709552223	0.447199030796783	0.671829679666305	0.149979931945905	0.870342150386333	0.999999999999901	-0.244908603602934	0.797697553522287	0.970955455981557	0.497792690194722	0.57830290237439	0.794429508890364	-0.312914707681239	0.673422076987293	0.863814577020681	0.697190112341881	0.423561298200776	0.592011635062156	-0.405632132929962	0.67902638441894	0.852977693357183	-0.405632132929957	0.679026384418944	0.863746273627263	1.08440030495484	0.231659494568062	0.361402276987732	0.696425404770628	0.448769314689277	0.624827309163125	3.41134284122837	2.73164020498338e-05	8.25860197722882e-05	4.868722138849	4.03998507953949e-12	1.710206321785e-11	5.5104871306903	2.32382251157986e-10	1.54067698548859e-09	9.07005597407979	8.00429095171569e-26	1.19173720055404e-24	9.03099202066683	1.29135245566263e-25	2.04308292733205e-24	1.49030113343969	0.197019101279421	0.342733714632688	5.2523899973746
AL050338.2	-0.0443950577026019	0.960054163978079	0.999999999999893	1.13891457713131	0.140531884209899	0.245307045138764	1.54427020440567	0.0388242821463395	0.0839871137454954	0.0819033624010592	0.924023840365147	0.999999999999901	0.990432781584413	0.132153304797378	0.219484159331219	1.13005109720202	0.139978759591444	0.231232883847861	2.26783192845772	0.00190301139362129	0.0046579147975329	0.405714179524885	0.635474484736349	0.825539994901478	2.62153483303767	0.000432813740577027	0.0011543573295487	0.948524131619237	0.245186008307872	0.380844150946662	5.3209143709051	3.13132959654991e-15	2.11081112839895e-14	7.37853416828539	7.33805113465805e-33	7.57681830307629e-32	2.07129664272571	0.00893616192990191	0.0204871149835595	0.246303806800482	0.782278459092809	0.935253497898296	0.610592435049705	0.494612634140268	0.672438920257436	-1.2867573605232e-06	0.999999047282471	0.999999999999823	-1.28675735667909e-06
AC003077.1	-0.551024373375612	0.210139653606583	0.377270602311358	2.11653800402688	3.48515619316623e-08	1.65039119463563e-07	2.8569940695224	3.80343004521148e-14	3.98453371136958e-13	-0.0678627337523896	0.869588969299247	0.999999999999901	5.20779804491991	1.41757449418818e-64	4.58130096486627e-63	5.74632069042038	5.36279776154721e-54	2.81918036300088e-52	5.74362929742038	8.57875646183418e-54	4.73181512346984e-52	5.43083548250021	3.78091295262832e-48	1.68565992864046e-46	5.78731903432509	1.63671053074096e-54	8.57131877390363e-53	5.38059330740553	2.44476441837001e-47	1.00595241141589e-45	6.29550690401567	2.35192385920153e-64	1.58233119389646e-62	3.27273736087942	1.87070904220452e-23	1.37809352947622e-22	3.89865057292692	1.12047575897868e-20	1.83293331037578e-19	4.92065762504889	4.6323733026063e-32	9.91641945964704e-31	4.22865156225868	1.04229599673428e-23	1.46626497144502e-22	1.00802429373229	0.0272423589506491	0.0617637297697054	1.71887824246653
AC060764.1	4.11318685626604	2.84127433293451e-12	3.1197879048077e-11	4.54893382291113	7.17199870873884e-15	6.07904491918388e-14	3.01527512253741	4.77663389206731e-07	2.40778844477199e-06	4.85589839368376	6.73612915056275e-17	7.77306239027128e-16	1.71842316219895	0.00126182507425363	0.00289473733904975	2.20343913207496	0.000291076128197856	0.000794326162096067	1.73579028658175	0.00576766256312826	0.0130355156364156	1.02465344554818	0.147382736709017	0.252527101261875	2.10167520696627	0.00144286142962608	0.0035723279706089	1.39094953323103	0.0420135011149031	0.0805434964352547	1.97013248357194	0.0021994312782663	0.00520081581969867	3.07069435090804	1.407565936162e-08	4.76489435217304e-08	4.58678160623793	6.63627273749716e-13	5.65826042194076e-12	5.65418011338461	7.33532893440056e-19	7.02246881512413e-18	5.71727899075587	3.21358777264728e-19	3.32552389350508e-18	-1.10158689916911e-06	0.999999186447996	0.999999999999823	0.253192175169158
NMRK1	0.466956786234036	0.252416360595197	0.435525865706079	2.088271876503	2.80293703837099e-07	1.20542739471124e-06	0.889305463435253	0.0288926700755501	0.0646734140339648	1.79235984134809	1.04448798912017e-05	4.09673376288899e-05	1.21580453238029	0.000150994745639821	0.000383045593655439	1.50110627333866	0.000220754646719757	0.000611776827600962	1.43609990636837	0.000415597722851833	0.00112167096175371	1.32232056492082	0.00116095636913144	0.00303266780667433	1.63054554066963	6.14884847993002e-05	0.000182847438241394	1.36217917965359	0.000814603885555953	0.00212335524456498	2.96116072149049	3.11960897533256e-13	1.8369427262783e-12	2.17915437998372	2.40230187897162e-10	9.13073027860389e-10	1.13844741515616	0.013578481574437	0.0299323515916838	2.07896253903545	6.48397670421406e-06	2.12224110785865e-05	1.43321992283382	0.00191174706933834	0.00464442873523562	2.87139704568884	1.27292128131051e-08	7.62864533941445e-08	2.90442819398122
NR1H3	0.847909673629838	0.0453056641951161	0.104466643541184	0.944406026632007	0.0257457672900885	0.0543961564150885	0.42058881859958	0.320678113575973	0.504710360543373	1.15726166203968	0.00626428491277277	0.0157430514383602	-0.208557064089888	0.532202570320427	0.723738778816048	-0.628850412593157	0.137801916591235	0.228096499838073	-0.82209835201313	0.0529896015394308	0.098508520598379	-0.472764256568463	0.265706436074081	0.41844866842766	0.243301999996035	0.566136985463047	0.751281401908022	-0.374444115320042	0.377583761693486	0.545741513711377	2.08044504910878	8.77913762779049e-07	3.08315104159365e-06	1.30837805575182	0.000257488227180089	0.000612270470621286	4.17677937869293	2.90490911998774e-18	3.95595663594781e-17	5.72993021330699	5.94941855486256e-33	1.3336742035777e-31	5.12184463769515	1.15936344202782e-26	1.94919860774436e-25	-0.94588589236886	0.0634910531336118	0.130108936624153	-0.69270826973508
ABI1	0.984562900852668	7.3993618431599e-16	1.1231479928835e-14	2.01554216025615	1.04925550542667e-61	9.59463829187228e-60	1.23512186830679	3.50192719247337e-24	7.65127357959596e-23	1.8775651607206	8.65109175612672e-54	7.15349164989945e-52	1.45595043282734	1.07499723335949e-51	2.39748594688566e-50	1.21267220359192	1.8568711015168e-23	2.31620489411223e-22	1.32198895264244	1.8328053794778e-27	3.03728313194518e-26	1.02526268334632	4.27453898244362e-17	3.76634379230866e-16	1.17029069363164	8.27676629031399e-22	9.16263438611582e-21	1.35342625058593	1.03737350922154e-28	1.8042125351656e-27	1.55142161176549	3.13251093095497e-37	6.94131705282111e-36	2.10423255354706	1.44453520712456e-92	7.71729220464458e-91	1.84755538273083	4.30504786288205e-41	2.31703989440515e-39	2.16284660425874	1.17756165781567e-55	7.79765669138986e-54	1.91520504683731	5.67715392740378e-44	2.43159687198304e-42	1.59383632416585	5.93384653965206e-26	1.59259721019059e-24	1.92820058342123
GSTO1	2.03456901674182	5.51185660051851e-18	9.98709513765604e-17	2.59143149587001	3.22257090430376e-28	6.54980766192798e-27	1.58873560744683	1.48858115376713e-11	1.2250193024477e-10	2.58012051451983	5.42619868217936e-28	1.24046081688593e-26	1.1423155101044	7.78093808646915e-10	3.01252756959004e-09	0.786516415687587	0.00083434463294954	0.00212980226541784	0.824813238450577	0.000467361597016549	0.00125285023732234	0.743338757607412	0.00162765720845729	0.004160132206737	0.953381337715426	5.29295086003362e-05	0.000158563622384201	1.10620926980309	2.66744291480147e-06	9.57025679526637e-06	2.40770497715888	1.39073651387423e-24	1.64645368050998e-23	2.0742737220289	2.20111016529878e-25	1.7464738435175e-24	3.40520508973755	1.99492043860759e-37	9.11043647734174e-36	3.42623646503917	7.38044395243195e-38	2.13748058830416e-36	3.58322346597659	2.9662350218902e-41	1.10743005146749e-39	2.22457915541863	1.35304125750399e-14	1.43982000181833e-13	2.67033496473431
LGMNP1	-2.04587696466345	4.21641349235876e-06	2.22810967824758e-05	1.2087126601389	0.00632262180368566	0.0151385529134132	1.76256313777436	6.81314780839887e-05	0.00025540247839484	0.277526581280803	0.530850061943223	0.745480173209647	0.985813560681441	0.00466564588437143	0.00997369687755771	0.641774121392617	0.147038928048917	0.241313454334529	0.878249293078958	0.0472641774719114	0.088954558277518	-0.187323796261372	0.672442303309555	0.857988276482199	1.69526104968147	0.000128027881051603	0.000366213698512449	1.16944360527596	0.00824185475552737	0.0182436969581465	5.42344867340736	1.5138854377872e-34	2.94692878398713e-33	4.90856722103059	2.45802477564448e-39	3.15162336170355e-38	3.15593735424804	3.14323801046283e-10	2.04986392322818e-09	1.75836951854009	0.000458061664939484	0.00118688052016819	1.59696157672986	0.00146099949122453	0.00360966346934872	1.44600600863939	0.00625828581742666	0.0164271308711816	1.48883466981181
AL096869.2	2.65078632444942	1.21735608230496e-08	9.05864040010075e-08	3.94439961458416	1.03287348825494e-17	1.08098635325306e-16	3.21691698243033	3.07781852672811e-12	2.70739131744983e-11	4.3057441359799	6.84831299929417e-21	1.04899760834343e-19	-0.417952291055352	0.303123244552483	0.455489846764332	0.226547871762309	0.638618261883478	0.815086312340241	0.329482248001439	0.504174483219946	0.682365694211087	0.406364330264862	0.43256129643275	0.620236174778913	0.586381899089307	0.251494015050495	0.387852424120048	0.742713063655932	0.136214854453286	0.229823948273382	1.49256639872111	0.0018359777512962	0.00439923478122901	2.63914766944537	4.28935568253943e-11	1.71263800648027e-10	1.15091717905607	0.0328011563081804	0.0662379331094141	1.99626525615829	0.000225083375741613	0.000609405649170132	1.85967031160544	0.000696358789594193	0.00180369883961365	-1.74395622478517	0.00374412785940441	0.0102880209234301	-0.571589696236745
LINC02244	1.24268027356154	0.145061104168248	0.278512838986933	1.43628879016468	0.0926162579263606	0.170470158847526	4.18936473306205	7.52871324823421e-08	4.18688283149093e-07	0.973811721560588	0.258646938830208	0.421703743706686	2.18048172238073	0.00212665850283357	0.00475234650360142	2.7068766606945	0.000692745852419347	0.00179036144248977	1.30631070329559	0.120904468369912	0.205509570371566	0.858704667293347	0.345986035424825	0.519038067657159	1.84815084108909	0.0333508766384385	0.0650371696226694	1.62113374794047	0.0647926406398159	0.118964899362653	3.28179299959875	4.76255578834633e-05	0.000140048091884302	4.91231753684671	4.44258796767673e-12	1.87640155292266e-11	4.87406796558277	5.9320571162046e-09	3.36584096692021e-08	12.4981693214321	3.66385888561046e-52	2.10105874500073e-50	12.106009329273	4.77315336095721e-49	2.57735349833626e-47	1.08665473853731	0.31767300394057	0.505011768430393	1.79327561099638
NSMCE1-DT	1.05517697543231	0.0325717256116653	0.0785716782105113	0.296711927331758	0.560276981085161	0.764823298510906	-0.473295906770136	0.372744222277299	0.568124639510608	0.328537401168652	0.511672900430526	0.724841222143258	1.84807445149524	2.48520756995524e-06	7.45140870805148e-06	2.06646374198214	1.34690100413817e-05	4.35548113330942e-05	1.6698933630169	0.000591671835761427	0.00156338786864519	2.16289989420621	9.91456374591582e-06	3.37435581567006e-05	2.12847575154546	1.44684183336904e-05	4.63195307914967e-05	1.87421665124883	0.000133348960632687	0.000390393855184768	1.31699010729865	0.00818568314633291	0.0176675910600376	1.2887452371066	0.00241755686493413	0.0051460339167593	0.312239404718926	0.58727614077716	0.778512955431316	2.38915761946702	1.22733568448009e-05	3.88811475281002e-05	1.35830697558029	0.0195739783902474	0.0399700036666343	1.12949003544296	0.0961090821657384	0.186581650265617	0.987326295386103
AC015917.2	-1.57434744348057	0.00246310693848038	0.00791495118727877	-0.115927705274361	0.809457047456359	0.983839704656348	0.834631383191889	0.0734645309041653	0.146776806933133	-0.6808495488859	0.160941992179373	0.282924991375979	3.16961449446179	4.66218910401924e-18	2.86424673941056e-17	3.25462653274171	8.34728651077136e-13	5.14177117516291e-12	3.23555656543898	1.34591873957573e-12	8.36517116658059e-12	3.60138750608983	2.97293693428168e-15	2.29288709059324e-14	3.92817007551041	6.77192866422745e-18	5.85656525653812e-17	3.34097821466841	2.50583721724374e-13	1.65019144891876e-12	4.54446664247773	1.59665130588519e-23	1.77592121452252e-22	3.12201657181119	1.35285905210181e-15	6.9215980960449e-15	0.694233098917976	0.192252859309969	0.313858695568213	-0.0888499282006904	0.872361030442856	0.999999999999913	1.26689100313172	0.0195333358996904	0.0398995989465373	-0.000306935519083257	0.999570534656027	0.999999999999823	-1.5506221718855
AC018521.2	0.549956820611964	0.0600083002594519	0.133055392384328	0.923519608062142	0.0015010303605021	0.00400382363543249	1.71884695045156	2.71445605422549e-09	1.7734706996411e-08	1.30401381316902	6.81772364129656e-06	2.74233947863328e-05	2.08554228651601	8.76986341485376e-20	5.86921745786462e-19	2.44969229409459	1.78057811540275e-17	1.51875479708559e-16	2.43957845855449	2.79509228235403e-17	2.43747970027604e-16	2.28687983900714	2.46617977323583e-15	1.91364315320399e-14	2.56781904884566	5.92085817519733e-19	5.50341553761898e-18	2.38287831035004	1.5004042726017e-16	1.24669475153714e-15	2.28911105719924	2.27962833294016e-15	1.55116699042502e-14	3.32295544551525	5.93980563050172e-42	8.27813417618024e-41	0.607725852759386	0.0657348782198724	0.123258372540676	2.12303525179528	9.63603261273297e-11	5.06581397751423e-10	2.66807041660066	3.2565576135628e-16	2.710726939449e-15	0.573299431424645	0.117903329637823	0.222340196498936	0.144384472439424
AL035665.1	0.0790205318763568	0.935669377130551	0.999999999999893	0.280282736048429	0.770305989607014	0.952481062223872	0.0157216280460855	0.987391601805132	0.999999999999893	0.00311070505541642	0.997505579924241	0.999999999999901	0.519539407763444	0.500417102974168	0.689605633081552	0.385143963874218	0.688458174582318	0.86051354541425	1.84266260261966	0.0418455117878679	0.0797212674668281	-0.120464635792176	0.905839689811003	0.999999999999901	0.736781168125617	0.448671364750033	0.623716576124111	0.231535231350152	0.815478471915437	0.963039432409002	3.22412707226688	0.000206319777682509	0.000561954200779054	4.61327569704697	8.67275737620661e-10	3.18636539771752e-09	3.68258998474596	8.50164945763173e-05	0.000279648333072168	8.82475965228575	3.44831626569304e-22	4.10492324566397e-21	10.1647388354284	5.77604480523432e-29	1.10737107793206e-27	1.3724704632817	0.244740078699229	0.411064823549833	1.60987490320952
AC092296.3	0.513404100965856	0.334687454377287	0.54259639916326	0.223853175529196	0.679701327709694	0.876497982653578	1.71850832768733	0.000594373119226428	0.00190361400995991	0.625011890187372	0.229158792978263	0.381009771524628	-1.76430754554348	0.000308743608658442	0.000758131468942523	-0.380368397963959	0.491357698725459	0.666660476269785	-0.0886487505817834	0.874846979002306	0.999999999999901	-0.44697168329702	0.470224166399179	0.663578785262485	-0.404728048632485	0.514952889819562	0.69680683080027	-1.20594238491494	0.0660437131915379	0.121050243676419	-0.943037438644237	0.132565873963293	0.223057304250022	2.72237946668088	2.21352524793966e-10	8.43537996291587e-10	1.45083818427358	0.0111050811046367	0.024971271039623	3.31605492438256	2.05870494432068e-09	9.5499344380326e-09	3.52852848994895	1.73219130030583e-10	9.11843672905732e-10	3.80875154840256	8.29403972765619e-09	5.08152470318152e-08	2.71130073823774
IL4I1	1.04041292508085	0.0371241405550433	0.0879366677062772	1.6606090412343	0.000870033569270944	0.00241126010349166	1.37754620844996	0.00573831284634465	0.0152452578134298	0.470819351038309	0.345767858020328	0.534805503923796	1.93749612822956	8.13327842646884e-07	2.531984080564e-06	2.34933708769871	2.41770812532015e-06	8.4852205721622e-06	2.35086320428764	2.40123199723491e-06	8.53891019644522e-06	2.13765815697262	1.80698033473073e-05	5.97668784491828e-05	2.71490957982078	5.12732142589639e-08	2.09605609861591e-07	1.87537329097133	0.000169010998523978	0.000487367836962161	3.20234567910071	1.30515751597639e-10	6.32735864104288e-10	3.93018497997349	1.11952652366147e-20	7.35593413561997e-20	1.82113216046457	0.00127037006352225	0.00342685284884942	4.96476890390832	1.43452762838302e-18	1.34353670067929e-17	4.66992246998694	1.31576049165893e-16	1.12767337867551e-15	-1.73913579669854	0.00365067871543453	0.0100470234491366	-1.14960854005346
ACOT11	2.5422898755438	4.91179827221794e-16	7.58230767924049e-15	1.91529970417045	1.05448839329892e-09	5.80767016384475e-09	2.46303120118826	3.55676104912816e-15	4.08189314085683e-14	2.57027641299112	2.23405516122402e-16	2.48032936226508e-15	3.54136199273256	2.94878027668073e-46	5.59375709880228e-45	3.56787433778482	3.057452298488e-30	5.58738723214053e-29	3.59959331961652	1.0608745911427e-30	2.05270746389384e-29	2.98142774377507	1.62433833819938e-21	1.9215974182861e-20	3.67226816286189	7.30862520518856e-32	1.42190086003909e-30	3.36484632038423	5.09152088958364e-27	8.06533106174589e-26	2.67652446579918	1.26368409527794e-17	9.90119323799132e-17	2.27847523708081	1.16920042809917e-17	6.63254086934485e-17	0.877111388704707	0.0141179106961746	0.0310134766913232	2.21219557677649	5.10272361494309e-10	2.50982462910902e-09	2.9633615428848	6.17385894422643e-17	5.41957853380025e-16	1.0842341604403	0.00386500389728749	0.0105905904690625	0.58871809651658
GLMP	-0.0339896407366439	0.890318544504281	0.999999999999893	0.710690208983217	0.00386147550156522	0.00962146669605515	1.2802305958448	1.87374043965658e-07	9.95835701485802e-07	0.751072985304402	0.00225499794746697	0.00617637821826734	0.964867472714302	6.30082972030741e-07	1.98007223282856e-06	1.0573061381964	1.66141723035423e-05	5.30935691906751e-05	1.04818695226771	1.99904415565947e-05	6.41415249016421e-05	0.709648664829038	0.00391482249525142	0.00940977433852407	1.39238171572199	1.46237441230159e-08	6.28554869098184e-08	1.33527372322961	5.48052383414893e-08	2.31373227592898e-07	3.53924715996381	3.63653599320986e-47	1.24758975602511e-45	2.86553828077355	2.67464813516685e-43	3.92070128664719e-42	0.835336940576508	0.00271924558048349	0.00691047777957585	2.66685143684969	9.06700999421249e-22	1.04990379814469e-20	2.60357466379472	8.01744486550206e-21	9.23209578541901e-20	-0.367592997289494	0.212566577746363	0.365021354987819	-0.0621811789442076
GALM	0.825862131476289	0.0377315331552003	0.0891652624769722	0.138806111362889	0.727215717056013	0.918187666557489	0.633162801529078	0.111015582285464	0.208909372178252	0.68169823001901	0.0862989799829844	0.165125610486805	2.22225845895664	1.18760102165055e-12	5.4778567340172e-12	2.05326581213804	2.27825405947864e-07	8.91129486691683e-07	1.79995986339015	5.78390425846722e-06	1.97365124643647e-05	1.99637585295832	4.93317452167511e-07	1.93491000678659e-06	1.83731992109042	3.70367689116785e-06	1.26564845046731e-05	1.54851821062581	9.61706139140037e-05	0.000286685049189435	2.77418673423498	2.72014953469648e-12	1.50104715311285e-11	3.40342820912399	3.65062985563819e-24	2.76656890122178e-23	1.11844948019923	0.012985668449301	0.0287582388509903	3.73741581132176	9.35288862768653e-17	7.77151206366322e-16	3.86826047363159	7.68580870827959e-18	7.20612406918055e-17	3.20488078888273	1.53941907298286e-11	1.23564211980444e-10	3.39189314708518
AC008063.1	0.0464097706685151	0.962262447479073	0.999999999999893	3.18599184866105e-07	0.999999746763819	0.999999999999901	3.18599187749189e-07	0.999999746763816	0.999999999999893	3.18599171732057e-07	0.999999746763829	0.999999999999901	-5.30998869527476e-07	0.99999946357061	0.999999999999831	3.18599178779595e-07	0.999999746763824	0.999999999999901	3.18599178779595e-07	0.999999746763824	0.999999999999901	3.18599180060965e-07	0.999999746763823	0.999999999999901	3.18599177498224e-07	0.999999746763825	0.999999999999893	3.18599176537196e-07	0.999999746763825	0.999999999999893	3.18599181021993e-07	0.999999746763822	0.999999999999901	4.87944312304973	6.35676172746907e-11	2.50735634306385e-10	1.76741700871636	0.067663338010348	0.126453041212992	1.68814667311428	0.0800500694854342	0.139257514015745	1.4239034580254	0.147854444293821	0.245120752004703	-6.37198053874357e-07	0.999999576254884	0.999999999999823	-6.37198047147161e-07
ALAS1	1.82642278649788	7.59665240613925e-07	4.47714372687211e-06	1.45933952628516	7.77670586801673e-05	0.000250504490213474	0.825726137937838	0.0253928155188791	0.0577450619422922	1.58343456633251	1.80639992737341e-05	6.86417782300345e-05	1.61667418072394	2.68915870924512e-08	9.35978466456485e-08	1.61828273746891	1.1705096723015e-05	3.81363671975757e-05	1.83088934952894	7.12026793793717e-07	2.68037915145397e-06	1.53556126900193	3.21550755135613e-05	0.000103060011919105	1.57676733271073	1.96206050242831e-05	6.17920207701889e-05	1.42610218820334	0.000112726903590923	0.000332992354757328	2.30233715673576	4.50417229748508e-10	2.09480171662576e-09	2.06204291293488	3.98875283494195e-11	1.59632063278127e-10	0.380434978004611	0.36384705582222	0.53364796817851	2.41411082825396	8.06516203957239e-09	3.53960747432136e-08	2.18536774876606	1.78540653732573e-07	7.10799621145064e-07	2.29863811143644	1.96303660823031e-07	1.0262058462038e-06	2.42044444590799
TM4SF19-AS1	1.57098928067853	0.0223176922607298	0.056350986017903	0.0776611749298305	0.913126923539444	0.999999999999901	0.533534394583664	0.445871133302012	0.651800040967634	0.0541543146666087	0.938908178309864	0.999999999999901	0.567359606070449	0.312392842277274	0.467362120444495	0.0127841931051191	0.985529460848141	0.999999999999901	0.315973635787056	0.656151779428425	0.831979817202915	-0.131543353899662	0.861768354067517	0.999999999999901	0.123122111114248	0.868041840530192	0.999999999999893	0.0859421386537089	0.907356373299437	0.999999999999893	2.35227364401329	0.000586907841906843	0.00150668646375629	6.67012856572262	5.22218439702534e-31	5.07547017792641e-30	5.4129978294181	7.80978217038834e-13	6.62536394977366e-12	11.3377512387652	4.07670117868861e-51	2.23390282683632e-49	11.1857608738505	8.40083897354709e-50	4.69277933729438e-48	1.00270008757935	0.302527385927255	0.485922205074833	1.34594860057357
AC109925.1	2.79730560572508	0.00021782299503988	0.000863341568778218	6.72024967042679	1.17345462084987e-20	1.52221829912498e-19	6.93749814579394	5.85931970569116e-22	1.1075497596548e-20	4.57028912188713	3.46684006675912e-10	2.25253800603544e-09	9.09890282202987	6.78207975073177e-47	1.31269566277749e-45	9.85311584660307	7.99584398289248e-43	2.59237909507009e-41	9.84973024531098	8.92915476865483e-43	3.01627097502891e-41	10.3201030553826	8.55636312898041e-47	3.59597700815091e-45	10.404184198961	1.57154248724397e-47	6.19657366193184e-46	10.5571839267585	6.75379689613574e-49	2.99839383442447e-47	9.41430152805252	3.29547348349786e-39	8.05110802107283e-38	9.03349016252136	3.14009655834838e-43	4.58441424889339e-42	1.69862917463646	0.0499210965107759	0.0963861024697783	4.87004679966551	9.59880674506067e-10	4.59512812868149e-09	4.11124759961678	5.92508748103782e-07	2.23368378735135e-06	-0.515949245805702	0.636695600615707	0.842524304179179	-0.515949245805693
HEXB	-0.374997423372254	0.0256330854968667	0.0636073786307782	-0.0827005365480427	0.62213972911166	0.82356644727487	0.429967458517626	0.0102716337643919	0.0257551443350803	-0.333838946366763	0.0467273590710193	0.0961602374007665	1.52723251269281	5.14041376472254e-31	5.53516802751583e-30	1.42722309021413	1.41948780615768e-17	1.21681523386967e-16	1.38158275191524	1.51541024478475e-16	1.25608190149028e-15	1.25432673681611	6.76252434772901e-14	4.73886122370992e-13	1.43374026376376	1.07794286291323e-17	9.2110685628495e-17	1.43208872069645	1.14936928046974e-17	1.02827190722631e-16	2.64918884769727	1.59579309249198e-56	7.9993056231207e-55	3.06632725087295	3.75732806201175e-104	2.58551137267184e-102	2.3155780887077	2.50980783896377e-34	9.80044162005854e-33	2.57840232655348	3.77088430844929e-42	1.36075053759184e-40	2.87284541378688	6.35471412671872e-52	3.85775101552023e-50	2.3478512789996	3.32475438966623e-31	1.25140576179015e-29	2.93463895289087
NHLRC1	1.3422071623605	0.000278163674755598	0.00108207341714817	0.518392950716627	0.165812314896146	0.283029695476243	0.131876892702857	0.725654353999966	0.918530862315676	0.292092675477013	0.433944506835645	0.639449161640134	0.734652746828651	0.0135305690744167	0.0270857560928089	0.216110001192762	0.560139784874392	0.739449330396773	0.431131723005563	0.251805906649521	0.386968488812698	-0.684257882251391	0.102314730490933	0.183462596212993	-0.0870732740411232	0.827494554542703	0.970632968462012	0.00879201415098893	0.982044739074051	0.999999999999893	1.4227858828555	0.000118836058566785	0.000332761601218587	2.27924454152559	2.56175362065969e-13	1.16131913598219e-12	1.95380032247326	2.12926001205441e-06	8.82475471117084e-06	2.72157384611593	4.39811137153262e-11	2.37756969571013e-10	2.65258047364834	1.46273899471542e-10	7.74964327433482e-10	0.135407865181433	0.770921271881481	0.961326472898432	0.75890273439495
AC093627.7	5.37061987727172	1.49770576441133e-13	1.84525631699265e-12	6.00683593872239	1.10161127631503e-16	1.0695680634215e-15	6.64466311382207	3.60931247538889e-20	6.00023368898913e-19	5.17647010426207	9.99698493569559e-13	8.20051131582843e-12	7.63558257156312	6.33615700490016e-35	8.03147643291376e-34	7.83903024431372	1.49450110236227e-27	2.36407788831165e-26	8.59823446660524	8.42696274679578e-33	1.81656626092136e-31	6.77543891256735	7.69724148805617e-21	8.70153452913627e-20	7.85585169800086	1.35439113083891e-27	2.10382682826168e-26	8.31567048960652	8.95351024327722e-31	1.73477015324728e-29	10.4677967554347	7.5567394646626e-48	2.67404651151517e-46	8.785735569271	3.884717449226e-42	5.45152119516486e-41	5.13139825177343	1.26983003142024e-10	8.63941587470577e-10	1.97712516548991	0.0216678607235706	0.0427911533445962	3.88975143813369	3.10874740784091e-06	1.08083971411458e-05	3.57219989106175	0.000631124807473725	0.00199935903230074	-2.9526912309464e-06
TMEM140	2.15494939013831	7.83706054532658e-09	5.96518254881714e-08	4.30401715500343	8.21192212331396e-31	1.93867891103497e-29	2.88863016433669	9.70293067862885e-15	1.07088162725792e-13	3.98778035029578	1.10351573092748e-26	2.36300869642121e-25	1.83945977245707	4.11059241034003e-10	1.62531986245828e-09	1.98949520222276	9.6773687069828e-08	3.90786673731429e-07	1.8389934969968	8.41300691744702e-07	3.14475221093938e-06	1.89820858498258	3.70868414179564e-07	1.47654467482371e-06	1.92873432641325	2.40912132120097e-07	9.24148642598428e-07	1.9993383902783	8.51877840393048e-08	3.52921886920245e-07	2.51350573077986	1.63565916444419e-11	8.51137486678774e-11	3.12557518656866	4.20025915284142e-23	3.05202761915074e-22	1.16997608839998	0.00572991149245371	0.0136370816469366	4.73608937567221	3.65643478184559e-29	6.70471537918945e-28	4.27739151925825	4.36760256076159e-24	6.31400232841757e-23	-0.390502570956951	0.383658718475374	0.586235585321254	-0.683185894523537
AC027250.2	4.92801125039914	3.38656603466054e-12	3.69133247831083e-11	7.01324833451798	1.14029540636465e-23	1.77991318786955e-22	5.22787075809452	1.12897885070247e-13	1.12890715433177e-12	5.66644667027791	6.89448778415597e-16	7.41291526079077e-15	1.9053078190552	0.00343210746147622	0.00746472819035096	1.16584973182449	0.136084827811628	0.22559511258239	1.47469335770019	0.0544284415059057	0.100918663075058	0.992652788136308	0.235126055545413	0.377063261947726	0.688367503457634	0.42178488063325	0.593713940236988	-0.116256957646723	0.898588186278031	0.999999999999893	1.3228415704603	0.101478388700276	0.175730000452563	2.09691776307189	0.00223006150443874	0.00476535567924578	5.06257609504832	3.56657019100383e-11	2.552803279878e-10	7.12510951054602	5.14526476432652e-21	5.66044710624857e-20	6.75913883780043	5.92618848931837e-19	6.02426027762805e-18	-6.1438255324858e-07	0.999999563337535	0.999999999999823	-6.14382555811321e-07
GSN	1.07562639517849	9.07659355329536e-06	4.56263754045986e-05	3.9785639652991	1.14762816852387e-60	1.00206168584847e-58	3.92535285568072	4.19828959330378e-59	4.86065209605125e-57	4.29544273123927	2.03981947248923e-70	2.9366722423429e-68	4.198314874746	2.02044287077409e-107	1.83212723397245e-105	4.7227787146561	9.66849551544332e-85	1.26403819883389e-82	4.71846417263727	1.39384352199655e-84	1.98307037322173e-82	4.99395655108737	1.61050508192073e-94	3.00791360338808e-92	4.95460341855515	4.58774211745202e-93	7.47279911731314e-91	4.67941956493756	3.19447544850332e-83	4.11164677822755e-81	2.7489609966803	7.26883807481779e-30	1.12480967432233e-28	3.3623084741403	1.39017563017737e-60	3.41283737110824e-59	1.02246910476729	0.000197437417067046	0.000613122535089682	3.97322214005114	1.69193566940737e-47	7.76027500167599e-46	4.51037852330848	1.07306405191607e-60	9.54750443305326e-59	3.76869751235481	1.10677138639448e-38	6.62617997200458e-37	3.90283940851478
FABP5P7	0.238372165898234	0.52461796249684	0.751458864522566	-1.05029478749916	0.00511305094389215	0.012460131652841	0.0570697649708852	0.878906988178428	0.999999999999893	-1.14310230955564	0.00230764447323801	0.00630914407415037	-0.514744140303441	0.0809340511052702	0.14108604338684	-0.64130750900728	0.0868745050820767	0.151891438693581	-0.542464875561572	0.147802792510753	0.244499845500399	-0.975542976142301	0.00930297236341198	0.0208464669539689	-1.0928347506856	0.00358714761047905	0.00834668694528342	-0.896848466376488	0.016761435999431	0.0348968834334899	-0.36935369490002	0.324371742391854	0.48306244365252	1.9797731862998	3.97050851992473e-10	1.48889659780918e-09	-0.500985466264293	0.23845114189453	0.37596029302006	0.646446184303754	0.128009331401412	0.211239872783917	2.92205202861807	5.74807874247735e-12	3.43432285129462e-11	0.887501927910178	0.0474230344792978	0.100865499558674	0.522576248505294
LNCAROD	5.79987925450353	3.22151111187445e-17	5.50359929083593e-16	6.94082266556867	2.99557225307214e-24	4.81731438157774e-23	6.31293531746991	2.71595295785781e-20	4.55264264976329e-19	6.03240345744632	1.24854112551232e-18	1.65512962083879e-17	6.91769987837395	1.09176556109252e-28	1.07763964703452e-27	7.32170906561409	6.17784893020345e-27	9.43907410930926e-26	7.61040098747567	6.53347247166828e-29	1.15092375772764e-27	8.28014618202423	5.8560280791606e-34	1.35472810269362e-32	8.18742196612916	3.20722239922128e-33	6.6272775359587e-32	7.87525477505032	7.39855386970119e-31	1.43821188947768e-29	7.93884504581439	2.50699657112091e-31	4.17025258372874e-30	7.28314842787634	3.3633429193762e-30	3.18392271952761e-29	6.01832399216349	1.57328758882628e-16	1.84831183539076e-15	3.60477035369337	3.4773405249045e-06	1.17376392934704e-05	3.85436798233396	8.18564041024751e-07	3.0372385881617e-06	-1.84229361022269e-06	0.999998632919457	0.999999999999823	-1.84229360894132e-06
C12orf4	1.02514956235894	3.60003387778638e-08	2.51523147884921e-07	0.935560671332001	4.98500956819291e-07	2.0813038826359e-06	0.944274023588759	3.56154036553366e-07	1.82508659412794e-06	0.566187704068656	0.00238687844866828	0.00650475619081671	1.71805287994264	1.14708532200825e-31	1.2671428241399e-30	1.35689787768658	1.93993537613009e-13	1.24870916765856e-12	1.55022737689846	5.53593370992179e-17	4.73545042175149e-16	1.71110855183045	2.44361896385435e-20	2.67493053040341e-19	1.82773869390409	5.51616162267141e-23	6.57997289318509e-22	1.61912731291608	2.12994373803498e-18	2.00183351280458e-17	2.69736331099459	1.81652066176954e-48	6.58206396792344e-47	2.645825534246	7.2072404893006e-64	1.91711082889243e-62	2.38664964090533	2.52507876050416e-30	7.92349063844447e-29	2.30996409314143	2.23991671234096e-28	3.90405947880014e-27	2.13136491498973	2.37438612312239e-24	3.49099479311887e-23	2.21400938209987	6.38835040899593e-21	1.15046324159261e-19	1.4799983300915
RNASE1	6.327060492976	1.4836036649765e-16	2.39757052078327e-15	6.67032483077893	3.12755256620312e-18	3.430591843196e-17	6.77697495141969	9.00572831163416e-19	1.35565197022518e-17	5.84989366519018	2.26812398982596e-14	2.15171527279567e-13	6.50180325827878	1.10073006611956e-26	9.93768167462534e-26	5.5290372925801	5.31414919581673e-13	3.31991914050423e-12	5.62623638364627	2.10424891988813e-13	1.39112796230352e-12	2.86370498484842	0.000200565569425983	0.000582175714962081	6.31541978597705	1.68719258589216e-16	1.3327410732406e-15	3.95694520657894	2.51847633732192e-07	9.98952613536614e-07	11.0023395946894	8.48226590660429e-47	2.85534202296569e-45	11.8054210754093	1.71724736446433e-73	5.83311267744202e-72	7.99314064587259	2.63472519467693e-20	4.18827031417476e-19	5.40843655000528	4.36862946290111e-10	2.16189544607615e-09	9.98593149705392	8.69560990277681e-31	1.85149986675778e-29	3.20689511183673	0.000790958422186466	0.0024647076316922	3.11385397703084
LGMN	-1.96613946548077	1.83871526564686e-05	8.81422701475143e-05	0.991026012389542	0.0301404804451395	0.0627279378984096	1.45821369613212	0.00141659596319006	0.00423088919532174	0.0417568989521778	0.927241100152506	0.999999999999901	0.621784724021866	0.0839478975414878	0.145913440588963	0.29227519966361	0.522455707741165	0.700134358826589	0.554242077817789	0.225331482206682	0.35196356965946	-0.459759624972927	0.315008995279303	0.481253517627695	1.42110126234498	0.00187341495701493	0.00455804802083514	1.04899936712039	0.0217154802365189	0.0442124968722229	5.22542115864657	2.65105237133475e-30	4.19082863916914e-29	4.93958363637781	1.86174373370782e-37	2.24446258360786e-36	4.47421654036293	5.62119681547333e-18	7.47416996367714e-17	2.94637620157874	1.27964341608815e-08	5.51325193570951e-08	2.75249676448278	1.07064125112303e-07	4.36268617460684e-07	2.14859613654712	8.76136399524617e-05	0.000319262941482252	2.06193019122665
AC015660.2	0.802066285105337	0.373634282401854	0.589077887848082	0.740898442307011	0.417920520042095	0.610057013579463	4.44816139166259	3.54288407364666e-08	2.0421624769597e-07	1.06647983130812	0.227094313618784	0.378279381290683	1.57406271350462	0.0316890368457034	0.0597106067615932	2.3966043963512	0.00407409008006442	0.0093578328320492	1.22202155465416	0.162621271004375	0.265687609507384	1.36159470994453	0.131386777915563	0.228683527925645	1.89320885725877	0.034794323064941	0.0675897289393682	1.56975384289859	0.0830722280008602	0.148504497202416	3.66436387134354	9.26159842712193e-06	2.94996576489872e-05	3.88493174214932	1.35232024063991e-07	4.26699962042545e-07	4.9993650973396	1.19363972842174e-08	6.52700039793215e-08	12.1076326407197	1.29253926797161e-44	5.24131252258214e-43	11.6965076299772	9.47123924981597e-42	3.65189264388101e-40	-0.594242452965684	0.605833146768029	0.815366697643211	0.460937647789314
VAC14-AS1	-0.450806340471732	0.0263431137691839	0.0651604788770457	-0.349469162005989	0.082504136321242	0.153908888522898	-0.00268011680803658	0.989209324681823	0.999999999999893	-0.413018214117479	0.039178877169928	0.0821998536320666	0.159504081527708	0.311250112778676	0.466004546063838	0.346020075525657	0.0767313819930661	0.13601052184502	0.265270744365838	0.180687729775306	0.291075248182392	0.449198208951181	0.0239643186065209	0.0496756164646415	0.405238505663208	0.0422552377215294	0.0805411409094579	0.313486161036893	0.114528719117021	0.197567582256537	0.628270409598626	0.00148932961430895	0.00360848191499959	2.59263128986271	2.08886696631056e-55	4.38610101060384e-54	-0.125895104313932	0.578849821647426	0.770348323737756	1.46175907288297	5.30087930088965e-11	2.84894066256324e-10	1.7741332418686	1.18569781196316e-15	9.44233474968263e-15	-1.83373028248061	2.39973395448973e-14	2.49903511481991e-13	-1.78461980998534
CCL7	-0.40210210944185	0.705140942259912	0.912843396353187	0.579607175014304	0.561616707799155	0.766219680910665	0.284279671290548	0.779917092966858	0.957977578086577	-0.105684818559154	0.919371017021896	0.999999999999901	1.63412919830563	0.0382280853036127	0.0709491596306618	1.19507737824154	0.216916015597038	0.33809988873071	1.41886616657981	0.147239665241429	0.243751688115114	1.87523896967251	0.0568504611869242	0.108781671591937	1.92858935408132	0.0493827203592362	0.0926737738512273	2.17269377474105	0.0252379470020202	0.0507514953542992	2.89154856010241	0.00219143676380594	0.00518267187716754	6.33405519766645	2.43521279357359e-15	1.22879134346247e-14	10.7950163284041	9.7344246780478e-27	2.45278443902691e-25	3.72770947938262	0.000321635258574071	0.00085214830364498	4.40471237863425	2.10398847677009e-05	6.64577499649783e-05	4.85411713548798	7.33226409335212e-05	0.00027031464838654	5.95098318183726
ACE	3.36421696783255	5.42857407646765e-10	4.70081674885614e-09	1.75849371275646	0.00119810825213179	0.00324302447990437	2.56500383992029	2.23388771900398e-06	1.03554616469668e-05	0.324207613771185	0.551369140588149	0.76692582562241	-1.41389207975885	0.00111476152464172	0.00257393824775153	-1.52795722691331	0.00530642529137401	0.0119628890627597	-1.15276928488127	0.0363006736458563	0.0701407024673858	-2.6531430697598	5.27482103965106e-06	1.85179561761405e-05	-1.73712319233747	0.00204761342937244	0.00495279407871709	-2.93510740139037	4.84489946904338e-07	1.87067611753476e-06	3.03787879287346	2.10136130134722e-08	8.53835785216877e-08	1.28959810932994	0.00503866234519044	0.0103127134020818	2.8199963081279	4.40314260211651e-06	1.74862040482077e-05	2.97098206852594	1.33460094715324e-06	4.71705964414964e-06	4.20228742972101	7.61671077559036e-12	4.50400975325335e-11	0.286420226974266	0.6583926612993	0.864166665975576	0.161537321561704
AL035665.2	-0.0502824280699658	0.959635759643454	0.999999999999893	-0.0502824280699677	0.959635759643452	0.999999999999901	-0.0502824280699681	0.959635759643452	0.999999999999893	-0.0502824280699645	0.959635759643455	0.999999999999901	-0.0502831772367642	0.948282153041062	0.999999999999831	0.094671745473761	0.922183800702842	0.999999999999901	-0.0502824280699645	0.959635759643455	0.999999999999901	0.831871112675382	0.376489804192625	0.555022134465299	-0.0502824280699684	0.959635759643451	0.999999999999893	-0.0502824280699677	0.959635759643452	0.999999999999893	1.31434599481664	0.14902137844797	0.247217364781496	1.57090010206413	0.0445630726504214	0.0790577755868448	0.48299589717443	0.63773180339976	0.824295083496979	5.59338372961932	2.60228841501974e-10	1.31506100317134e-09	6.41973581296988	3.04253735661671e-13	2.01498544491218e-12	-5.61874664382946e-07	0.999999627436524	0.999999999999823	-5.61874666625344e-07
AC011481.3	0.549053607910411	0.401228900980538	0.621364159583557	-0.448297868096139	0.493380783969019	0.694252222792372	-0.547086799040724	0.403094845426775	0.603671016848157	-0.611059368057764	0.350490876452637	0.540530994281814	1.27615075505629	0.0131457223611224	0.0263793563742363	0.0706202892611636	0.913995176701133	0.999999999999901	0.424838716954676	0.515978023806094	0.694512909610223	-0.711758782997993	0.277057587931053	0.433402538595506	0.823874951102251	0.207770355710025	0.329455454321353	0.638167607273946	0.329150792233173	0.488013056268625	3.76775510309892	8.18989829711075e-09	3.44286043561431e-08	1.88322093623983	0.000655564791137035	0.00149254818664537	4.23506846580295	1.09437782893612e-08	6.01735528436636e-08	4.21354128865548	1.2984110274686e-08	5.59178461704979e-08	4.27388605846848	8.03325997541921e-09	3.6442076330016e-08	-1.18494489755839	0.134463894197916	0.248733982230066	-2.83159489975628
AC010320.1	0.604594405254629	0.424878539618743	0.647648764915634	0.202228106656187	0.794378430799349	0.972108270714081	0.0146238015371789	0.985313614833067	0.999999999999893	0.214251288707922	0.77808591322475	0.965903197074982	2.40424456988389	2.81988020114059e-05	7.69483513220191e-05	2.08563687519857	0.00161607952860033	0.00396302418315846	2.05342300769787	0.00217127650342734	0.00526735999499954	1.8981146521962	0.00776679123668161	0.017665177378785	3.36268680419629	4.04157262750734e-07	1.51782291465705e-06	2.70033909093585	7.22725932253978e-05	0.000219151398522796	2.73331384964522	4.4885741944344e-05	0.000132434156454636	3.33609677527905	1.33936058023202e-08	4.54159453310331e-08	1.25089152321348	0.104466993240816	0.185474140772431	3.1206125365072	1.41485650505736e-05	4.44896249704792e-05	4.38864621853889	3.2405691189397e-10	1.66656461104434e-09	0.640603427201928	0.469622676700922	0.686627658144158	-0.233184201903784
FAM151A	2.5675101228963	5.7471186607165e-14	7.38109418641286e-13	1.92785523274786	1.9140474445929e-08	9.29227388973228e-08	2.57714391316332	3.81382529636872e-14	3.99453803823879e-13	2.44953921766008	6.87207858365682e-13	5.73835762691578e-12	3.67972185797904	1.15137442215213e-41	1.85686316010338e-40	3.70725307282949	6.94418986448636e-28	1.1141336527854e-26	3.72257435267403	5.43444130821812e-28	9.23683167260839e-27	3.27641802317364	6.22670043188089e-22	7.56414314393206e-21	3.95688236507448	2.17820871959984e-31	4.15054640128026e-30	3.81133730254158	2.84649729357421e-29	5.12423752502154e-28	2.93379717844945	7.56138218851558e-18	6.01590033889908e-17	2.32335464959748	1.86861320828114e-15	9.48749719765481e-15	0.603542816314114	0.127967991850217	0.220887730999151	1.93715074831867	8.26376479134088e-07	2.98870325597154e-06	3.03509710318162	3.92564045203469e-15	2.98723643685103e-14	1.50376162622014	0.000264354799406522	0.000890171632418439	0.983121597711718
NECTIN4	3.86291950140743	1.4524232278644e-09	1.20196419086599e-08	1.2061849257316	0.0634772814457191	0.121650748202281	1.60143015664069	0.0131014293359772	0.0320592735984022	0.669981676766872	0.304254490954838	0.482610915889243	1.96154082077895	0.000139049151215952	0.000354248354731552	2.43896577605358	0.00013784057949953	0.000393494384900017	1.82887466817177	0.00468373895281974	0.010747936639694	2.02119560024159	0.00188727017048146	0.00477948379439294	2.76210246069266	1.81627981023864e-05	5.7465244069821e-05	2.03741990022938	0.00167088504877466	0.00416548432810686	3.84962140616519	1.69066835215841e-09	7.50368843003566e-09	3.51441989012751	1.20744764612173e-10	4.68206059914871e-10	4.88818941893008	1.00544469234714e-11	7.62758416546034e-11	6.09705845102608	1.99018277470396e-17	1.73178355021263e-16	6.44993952552123	2.49039887893578e-19	2.5958197493545e-18	0.511743657568466	0.554036483260698	0.776081530151995	0.0601402990219543
SPR	0.869214859242982	0.00978673268370333	0.0272162894018659	0.924874899643245	0.00593020440324291	0.0142745709393944	1.48190939079809	9.61970621180782e-06	4.10706853151813e-05	1.8388704695673	3.94611557163514e-08	2.08299267292347e-07	2.07349332398833	4.65581471259919e-15	2.44863014909176e-14	1.64952150536752	8.00617954809552e-07	2.95387783754118e-06	1.70444472504093	3.59998889454343e-07	1.40256332792968e-06	1.13127757918498	0.000764376810069854	0.00204905510853472	1.66589407727707	6.80168136992875e-07	2.4987635936485e-06	2.18010970475166	7.15572250702874e-11	3.88388905049427e-10	1.80840053565506	6.73466905469775e-08	2.61709629002968e-07	2.48643552319516	1.82949498306462e-18	1.08256341759891e-17	1.75475804651154	3.66878714752805e-06	1.47234068045725e-05	3.45898694935744	5.71909090409097e-20	5.87835816368684e-19	3.29632499775132	2.85971637715486e-18	2.75608958046176e-17	1.94798828528287	1.77486246806737e-06	8.21711049731435e-06	1.95543017617808
LINC01827	1.06089961598178e-06	0.999999177715672	0.999999999999893	1.26407837890001	0.172622358920696	0.293063607485026	1.01320285582898	0.280961333404187	0.453859876411107	0.313471858378122	0.746980574541722	0.942331238291999	2.64527243482312	0.000473142411326793	0.00113977297363893	2.42478415940359	0.0059631890491394	0.013313211052477	1.94374658014654	0.0310969055440529	0.0610194147283171	1.2184867207502	0.207561774290003	0.338801609844113	2.83807103234906	0.00176247404938121	0.00430698327318263	2.14646604055073	0.0207159050269754	0.0423691204433338	3.98737495245354	4.41142635361489e-06	1.45086977837512e-05	1.01609922639327	0.225566214924358	0.341643314123954	1.23356593537337	0.228355718632319	0.362844441420984	6.2922635471594	9.47714596819248e-12	5.41015378316515e-11	7.12063825269964	1.29217932295646e-14	9.48446801993684e-14	-2.12179790446362e-06	0.999998624055194	0.999999999999823	-2.12179790446362e-06
TWF2	1.44930112178371	2.93921612934485e-13	3.53281812472933e-12	2.057285225801	3.46203881287051e-25	5.87611240333281e-24	1.57053789098722	2.50108592380109e-15	2.91066262090643e-14	1.99370012787013	9.32581375375663e-24	1.70361627156522e-22	1.8498663993265	2.96078806342967e-32	3.35680278929394e-31	1.83914390559133	1.78057810350021e-20	1.84594737678131e-19	1.90450529952001	8.09579046138009e-22	9.41162393627347e-21	1.9212616339953	3.61906454322706e-22	4.45684850176992e-21	1.95879188138573	5.59954347974043e-23	6.67606348693839e-22	2.22714142236799	2.97363126221723e-29	5.34292202104813e-28	1.97690888006694	2.18405096129374e-23	2.4060372842328e-22	1.86627032851317	1.10441365943085e-28	9.92267770011265e-28	1.51564266119884	1.60071440876803e-11	1.18992781368656e-10	2.45089103111177	1.09929347740807e-27	1.84043692662858e-26	2.40649804831009	9.44721415625975e-27	1.59558085666536e-25	-0.240999250542833	0.310398835483693	0.495867624598167	-0.446743225146681
TM4SF19	2.05262828120331	0.00617548666100571	0.0180615109532491	0.563096452802288	0.46203488043403	0.660227261941254	0.240421257753242	0.754673803411325	0.93920661955266	-0.303298010795765	0.696688066295807	0.900804336333986	0.119842328941153	0.845776599881471	0.999453738256584	-0.505380040994431	0.517644856549821	0.69530348191015	0.299395138779288	0.698584553223073	0.869889560638943	-0.0967538072078599	0.905262992519397	0.999999999999901	0.726888811166191	0.354782450955585	0.516038263203257	0.200394805544445	0.80072313450078	0.95106257743056	2.86084200337121	0.000128127524340827	0.000357228399708288	7.02217512482712	1.18234993603934e-28	1.06097262332828e-27	6.13113094998893	1.85087064998385e-13	1.67182441482222e-12	11.7759778076101	1.8942887081195e-45	7.98144444040294e-44	11.6284162741113	2.32069212508809e-44	1.01325801276085e-42	1.2163096865608	0.2307413691617	0.391080617722449	1.67584195413224
AP001961.1	-1.90307182090266	0.0219743994726597	0.0555825814131206	-1.39638884983954	0.0760766954174431	0.143092697232599	-1.25027289207758	0.105875445527673	0.200788438268456	-1.52131595702782	0.0537066961006778	0.108737402079277	0.452991430188958	0.411141656522114	0.58886847157223	0.269540370320746	0.691930048121064	0.863738541399195	-0.391801595746367	0.579492842362127	0.75860054296339	-1.48622526494208	0.0718315514758602	0.134008547940213	-0.560998499717129	0.463280591915277	0.640481893008134	-1.9499414194936	0.023043518284823	0.0466749570438739	2.36209966610277	0.000284412836798991	0.000761214779690736	7.66406837921386	5.48159025681326e-45	8.47955467765927e-44	1.32480782928535	0.074501397601908	0.137773315184074	1.99132047490928	0.00668990216294018	0.0145196028208865	0.841277976057956	0.286191447409504	0.429822550572996	0.222095962563126	0.766546959394072	0.958514490776387	-2.06719071400003
LHFPL2	1.38129086461048	3.61928212679857e-06	1.92874582382202e-05	2.61839538973476	1.56810775144314e-18	1.7575087178072e-17	-0.247045432460337	0.407757310145607	0.608896786879146	2.13580879822023	7.77213020458532e-13	6.4620359983913e-12	1.54230522468176	5.00859788527178e-11	2.10563547505894e-10	1.12177020804994	0.000167695960286971	0.000473829245733741	1.4250803618212	1.75396304663222e-06	6.31894350597605e-06	-0.238593314202452	0.42420321154863	0.610677398733465	0.777398476624231	0.00915418899077835	0.0199454070736807	0.886289096588154	0.00295852702881049	0.00707855651420358	1.35351443472835	5.63327189895954e-06	1.83401710572331e-05	1.98285286080547	3.64339098574182e-15	1.82425289039921e-14	3.41521391068538	5.02944660692048e-24	1.05256757377725e-22	3.05228070481417	1.65199405881581e-19	1.64795238581504e-18	2.24394793642464	3.12493092878042e-11	1.75260801781692e-10	0.531082017798671	0.137443150646295	0.253460945035294	-0.137184176881541
PANDAR	0.734530877923474	0.0166789148104502	0.0436053740813172	1.96080553532396	1.59195433980175e-10	9.43258295923935e-10	2.55348007056394	7.95152218056253e-17	1.04017184503803e-15	0.872232084598742	0.00446105578735268	0.0115379699300439	1.50640490726052	4.40933245039401e-10	1.73855585690418e-09	1.25741605549575	4.08702679859799e-05	0.000124677900818932	1.24589161276311	4.84338206656267e-05	0.000148291300438645	1.22130764627092	6.8259687810861e-05	0.000209992742207757	1.13885230522357	0.000204891561489561	0.000571506506647912	1.02064550398571	0.000874825571620719	0.00227080643623738	1.64908986184178	7.48710108913673e-08	2.89854774697728e-07	2.71598906313087	1.08385242861189e-25	8.69519881189254e-25	0.789794536956195	0.023133545599968	0.0484401352154455	2.93129315509637	3.21067347271718e-17	2.75672864264158e-16	1.60133335053945	4.0870419037301e-06	1.40307140613137e-05	1.10225146049727	0.00264652217776678	0.00749033961121446	1.13096183257382
SCIN	1.10362671675843	0.150651826306941	0.287303588178883	2.61776394594437	0.00059917767140205	0.00170373980124214	2.37900111324587	0.00181288260785268	0.0053080726304554	0.488908030776211	0.525258245866795	0.739738315288997	-0.485649650502186	0.432490678195507	0.613431287940463	0.54826554952096	0.475041203279466	0.649312464714258	1.60245425081806	0.036555799062028	0.0705913639931129	-0.438643637990761	0.584319122261979	0.78715798432602	-1.69149607452433	0.0451690240937797	0.0854519280354789	1.52973351528598	0.0466215340686294	0.088425239742312	5.10941589029739	1.8205556120712e-11	9.44505969784645e-11	6.39281293418507	4.04518303391211e-23	2.94272249261006e-22	0.123390297102142	0.888498337094392	0.999999999999876	4.82669763237349	2.03776438999711e-08	8.61330123314183e-08	2.64852709542972	0.00225524248188627	0.0054186721157905	1.49773428314644	0.156543353539728	0.283145902556139	1.24641330109876
AC006967.3	1.00080335167845	0.237528645936081	0.415176342204723	0.630222246755076	0.478665680176141	0.67828148188653	-0.072110753409148	0.939785961843244	0.999999999999893	0.0441561539473767	0.962109380430475	0.999999999999901	-0.0721130246696021	0.922802910780073	0.999999999999831	0.00367634892693273	0.996845635129377	0.999999999999901	-0.0721107534091351	0.939785961843255	0.999999999999901	0.394132880255303	0.670233876207456	0.856028496957893	1.25389751842477	0.147781826292442	0.245966320023118	-0.0721107534091313	0.939785961843258	0.999999999999893	0.524883648990793	0.561893656235193	0.750593224154009	3.84430081659729	4.28830555441358e-08	1.40277799135711e-07	1.54862248520733	0.0884591585074713	0.160272691366558	7.88879963553658	3.90450380401253e-22	4.62670298588514e-21	8.43215216738085	3.97363193545211e-25	6.09137307618462e-24	-1.70344360374532e-06	0.999998826149624	0.999999999999823	-1.70344360758944e-06
FABP5	0.321501121480839	0.439246072578318	0.662939060974568	-1.11025956324233	0.00787598904644959	0.0185538725111477	0.135182567777613	0.744831863125712	0.93283416174235	-1.39066925781995	0.000875041307003969	0.0025772268109902	-0.273048443798024	0.404627633375961	0.581170222972272	-0.309494857056386	0.456020907613862	0.628446464887192	-0.158531177947285	0.703144008429649	0.874464858077114	-0.67583926725373	0.105595485466861	0.188722767253694	-0.61071940094498	0.14363375161935	0.239839779604908	-0.646698907814765	0.120967009526056	0.207251047440511	-0.0198404071426365	0.961968962223894	0.999999999999901	2.24549125374848	1.52111184796191e-10	5.85975740867719e-10	1.59799452423954	0.000672727234821543	0.00190681349534206	2.78311220311981	3.10841992475063e-09	1.41742963159001e-08	4.99232481712239	1.96775630452733e-26	3.26590784350445e-25	1.79760944814612	0.000398311649133725	0.0013032518785156	1.39340192254602
PPFIBP2	-4.67028771624269	3.91603368809173e-42	3.20592172139323e-40	-3.37189881849362	4.68478202349981e-26	8.37461052560074e-25	-3.33403767759891	6.2635148817029e-26	1.5290421316124e-24	-2.23585090381464	4.32890413200313e-13	3.68600738562555e-12	1.03892582716294	1.29069957126979e-05	3.64290425682011e-05	0.960791495102804	0.00144649019299515	0.00357359908609574	0.605266389953842	0.0453449923535984	0.0856892458442306	0.960946946251908	0.00147893945394969	0.00380556083865676	1.59537172003661	1.26426581866591e-07	4.98415326959785e-07	1.25652368328769	3.1609470576805e-05	0.000100015845779124	2.55077157446721	2.64566511538315e-17	2.03011990206899e-16	2.14775936886681	4.06379791389841e-17	2.24688983785261e-16	0.450391847550222	0.189002382923727	0.309369919703794	1.48384891112742	1.47128338230902e-05	4.61574381352891e-05	1.7913223605139	1.64578274192215e-07	6.57284958545079e-07	1.66541956298663	5.28482424534556e-06	2.2957443707687e-05	2.33474733182555
RAB3IL1	1.2026465021879	0.00180804730505742	0.00598757224824714	1.94009142357757	4.66267028450206e-07	1.95346743177047e-06	3.14072995483619	3.12784660211607e-16	3.90666551941187e-15	2.00252967788633	1.95972624234364e-07	9.51785517278e-07	2.51691701663265	1.07950146140013e-16	6.18816682359404e-16	2.42020586090803	3.08242073390803e-10	1.54722359822905e-09	2.7275882856017	1.32509995429645e-12	8.23895373896944e-12	0.789195055224881	0.0408363182076504	0.0808354225419927	2.48821216929798	1.00333358996623e-10	5.17745999445432e-10	3.64415611545107	2.5695236893414e-21	2.9044410268825e-20	3.65277712082923	2.07513751917794e-21	2.04607882623715e-20	4.44946732326999	1.47800626295847e-42	2.10681410621432e-41	-0.292044635203317	0.505837420722756	0.696120917611127	-0.484364421682299	0.274473419137284	0.409267941234335	-1.69995745491053	0.000189876611149477	0.000533064817302976	0.0589638696955094	0.899094855657674	0.999999999999823	-0.0103721497255726
TSPAN15	1.68814627258644	0.000355596920670643	0.00135615466992727	3.2334918040319	7.62704214326245e-12	5.08115837482488e-11	2.4502564013848	2.14174570567775e-07	1.13026077420511e-06	2.37203790241922	5.15630516062053e-07	2.38845111112417e-06	2.8667939578795	1.32834767024385e-14	6.82168047935313e-14	2.53509992981698	7.98614492714179e-08	3.25234710019052e-07	2.4546455814868	2.04116345921021e-07	8.14797821524802e-07	2.85778230122566	1.45487926718722e-09	7.24862239073515e-09	3.0333653035471	1.35232547620557e-10	6.90741765998295e-10	3.2297371611883	8.0423833552316e-12	4.71454532825857e-11	2.26046345317947	1.71927706645431e-06	5.87999077598941e-06	3.47648647515935	3.28807062375602e-18	1.91741652056128e-17	1.10539712819785	0.0391809985692828	0.0776262900887962	0.694064593293381	0.19607961109656	0.305987719658052	-0.225781469961924	0.675474280475775	0.855628294175075	3.32780990859068	4.56371282346571e-09	2.87626554559106e-08	2.71890197871748
C12orf40	0.422973325322863	0.355197630388515	0.567108445435756	0.994470580284289	0.0236945328855985	0.0504412110757848	1.54175185296113	0.000279692006424525	0.00095069520813667	0.693613459616224	0.114209155902905	0.210711297093376	2.50346322339751	4.7090187311612e-13	2.22236418261864e-12	2.14709786029241	1.74642592430311e-07	6.90025820765453e-07	2.45724091138703	3.35794546801581e-09	1.5785607009167e-08	2.29873052307177	9.85046500317528e-08	4.13625471873783e-07	2.41478502528088	1.8546457638279e-08	7.88549972510697e-08	1.11828777797255	0.0141693147518499	0.0299322892953416	3.9243933621073	3.78625811442435e-22	3.89686518657551e-21	2.24163839533234	1.10416324991949e-09	4.02341549431058e-09	2.05361738019363	1.17618693946481e-05	4.38879862492704e-05	1.93699402067561	8.54123713435015e-05	0.0002444541438833	2.21515778762224	7.59120430054159e-06	2.52242898033204e-05	-1.69501656961542	0.0103671759242301	0.0259795378850322	-2.87295663623659
PLEK2	1.94886506162011	0.0058840964639297	0.0173175741225325	0.423704682230767	0.564955024166304	0.769493717696653	1.75077568008197	0.0133318339637691	0.0325657172896143	3.05065798066599	1.17005544106971e-05	4.55819375459974e-05	4.5426738591277	6.0027089310833e-16	3.30663241974705e-15	5.74144752679893	8.31572161363053e-17	6.76971392824217e-16	5.3869695407346	6.20630791357964e-15	4.61518420758783e-14	7.92922578355246	1.22337975638514e-30	2.42933287995148e-29	7.56888760995089	4.70370249414519e-28	7.53437757598971e-27	6.18032651166651	3.29155386197029e-19	3.24802861453709e-18	1.6057559867621	0.0259214790149442	0.0510876619258849	3.1740083102374	1.26717971486859e-07	4.00634145946905e-07	7.44164485823645	5.56312296335716e-22	1.00159945112757e-20	6.04762500376525	5.77298185865309e-15	4.2169885680157e-14	6.52322710498957	3.40115002885383e-17	3.03920193173664e-16	3.58381846551937	4.12332555204743e-05	0.000157664008595258	4.33966566388354
TMEM251	-0.553870141266129	0.0396910262888347	0.0931203441345826	-0.67609349454434	0.0120287461239557	0.0272997342710946	-0.358067097174834	0.181548616376132	0.316777925227516	-1.45451489200986	7.6608520870945e-08	3.91111765708731e-07	0.689355926376398	0.00106718194426171	0.00247087753658537	0.399441376033075	0.134224786163506	0.222777683344906	0.77954486729776	0.0035139681517252	0.00824510969166682	0.274292743343304	0.305826824845358	0.46973267918475	0.741424329682772	0.00556199140710482	0.0125468857735153	0.917774162449912	0.000586736859517413	0.0015610075490298	2.3494889450106	1.12826125274002e-18	9.47688514999011e-18	2.53999191849228	2.02103615190598e-29	1.86138201399219e-28	0.315218685132793	0.298449697515932	0.454212494152049	2.39409164865886	2.14985820181114e-15	1.61834724908251e-14	1.93435989381429	1.52131961163522e-10	8.05129621177973e-10	0.857208231364576	0.0088048459303461	0.0224128095711461	0.189956312358362
AL031600.3	0.2588624640833	0.231755696009024	0.407619756948962	1.01535298469277	2.50784406770356e-06	9.7080618667593e-06	0.513539461519072	0.0172882884543773	0.0410210408739914	0.503187731292601	0.0198206185138671	0.0447882832424577	1.12645257072933	3.51916429175002e-11	1.49239694431551e-10	1.35281144393307	3.13395789046389e-10	1.57195090248248e-09	1.43022004261078	3.08633771031061e-11	1.72476217722799e-10	0.948024512863013	1.11306315881515e-05	3.76624259802499e-05	1.42581712647405	3.6803012112021e-11	1.96926130849064e-10	1.87539825290295	2.85149404695105e-18	2.65567871245715e-17	2.39654479316415	7.40051411092624e-29	1.08975667911061e-27	2.7536268726336	1.1994573951395e-51	2.25744032828818e-50	0.455280556365203	0.0628469629785948	0.118461695151063	3.15300547058582	2.11666975319566e-38	6.25256758868971e-37	2.46007013059493	5.484117297729e-24	7.87313684580818e-23	0.31950855822868	0.216746000498745	0.371051745934085	0.235284298174043
MAF	1.45403640884332	0.000794295408943836	0.0028327770654798	4.02321151570251	1.4354972067713e-20	1.84974177898636e-19	5.12038687654826	2.55960516259043e-32	8.96279236955405e-31	3.00303279644862	3.97010712696184e-12	3.08507617755061e-11	5.87362640047423	1.80833463681579e-66	6.18745378046902e-65	5.3358244749195	5.91683180919858e-35	1.34689367108877e-33	5.67493687404645	2.6042159975609e-39	7.61630837061749e-38	3.79419523363632	1.82015614978723e-18	1.76092826867316e-17	5.00158501975365	6.53899730348118e-31	1.21991554354084e-29	5.39746155447338	1.0056589365908e-35	2.45373508201136e-34	6.00777022078979	7.53536904564282e-44	2.23350739488284e-42	3.21005662732821	1.86630266711479e-18	1.10369879587454e-17	2.3220840579456	2.2151162033571e-06	9.16034745123081e-06	2.98089940012473	1.22976097630581e-09	5.82037406416632e-09	3.87244749321418	2.85301351992804e-15	2.19553572748453e-14	4.80322133322904	4.64733107370653e-20	7.82344896395849e-19	3.5973352627431
CCL13	2.90810489760935	0.00429497801779755	0.0130655510449963	9.81181018818006	5.3508457981591e-23	8.04839750604322e-22	7.27397034963841	2.61470533961372e-13	2.53199746058493e-12	3.25485713580561	0.00127320984227223	0.00364842009953407	1.78850532679948	0.0404059693533564	0.0746275207465972	1.93035888176142	0.0630404796885147	0.114126389370229	1.00979916420897	0.357330711412352	0.518000494565307	3.43786310326823	0.000888788520572408	0.00236084603292785	5.26693887299199	1.61042618605179e-07	6.27965178723199e-07	2.16257099572509	0.0415256559052532	0.079721495955962	3.93568170991376	0.000105982215194192	0.000298496517938204	10.5662527761541	5.13507101834199e-33	5.33369168980616e-32	4.45563166526063	5.79967937820751e-05	0.000195351530851754	2.43717697217664	0.0334793599914869	0.0635832794850425	6.49052568757132	3.37616209651919e-09	1.58344173393763e-08	0.27293372798973	0.841127602034286	0.999999999999823	-2.17174609442035e-06
AC113554.1	3.40252483330248	2.09532623388958e-11	2.10142091953805e-10	1.63787112976319	0.00131415585238063	0.003537578128553	2.5773506044556	3.93223986967414e-07	2.00180207698887e-06	0.303607606060591	0.55364236971518	0.769247231085233	-1.21224980627374	0.00338640991388002	0.00737116597406636	-1.35675107351392	0.00915518827972489	0.0197372280352586	-0.96776004840837	0.0649293087344697	0.118347543291477	-2.11022763333753	0.000206604779355026	0.000598735501542095	-1.4718347259891	0.00726846039807449	0.016095835348734	-2.36566547420014	3.24491032466469e-05	0.000102576342773329	3.18339670996398	3.69897350215521e-10	1.73331827201157e-09	1.19038139764156	0.00598532736971566	0.0121296822842871	2.509614830761	1.29343418292159e-05	4.79520295939148e-05	2.90704470795751	4.52673185587462e-07	1.68541670759818e-06	4.14600852675478	5.30138040099166e-13	3.43667227471897e-12	0.308336962928667	0.611825131839451	0.819671112416692	0.154094515578501
MMP9	4.32244436465613	4.10726023349734e-12	4.44274448476561e-11	5.78347193601889	1.71407370212394e-20	2.1964208527905e-19	5.76006526647704	2.4340070498133e-20	4.0974765150403e-19	4.46388191544592	8.01827022758906e-13	6.65638897750413e-12	6.53339662470532	2.37235467640718e-40	3.66253983110682e-39	7.34247785655481	4.89196915100574e-32	9.81091309044778e-31	5.80034357951698	1.32750631292403e-20	1.42891550678848e-19	9.20649268606197	2.22455994006246e-49	1.04170995140989e-47	8.65309083297725	7.93456757491471e-44	2.62652535764714e-42	7.6092791112631	2.7836936389811e-34	6.34926781383631e-33	3.38241592091947	5.80890731297785e-08	2.27121139226219e-07	7.77930619911544	3.04524632287303e-49	5.34776509251829e-48	7.29768998007409	4.98065442745337e-25	1.1251125072828e-23	10.0375682657694	7.57133812078682e-46	3.23220611631248e-44	10.5753623990016	1.07134035800582e-50	6.21245439626152e-49	7.74263997191796	2.35689526900762e-25	6.05397834813012e-24	9.33258703375513
APOC1	0.80761569825144	0.215677007989012	0.385133437658374	-0.234766112417624	0.719042646511362	0.911389003765175	-0.518306873167965	0.427022222299025	0.630765462170145	-0.551618004419026	0.398010171630043	0.598336048421735	1.44633886718533	0.00483316161449255	0.010309092912939	0.135014208637413	0.835998897096275	0.977089821543555	0.470095633710829	0.471122346322108	0.647597432827693	-0.549880211846692	0.399591328475745	0.582211787119193	0.915091711641726	0.160647819702867	0.264389974890403	0.902850461611154	0.166279641533858	0.273372944004415	3.66734370071208	1.85798150720891e-08	7.58640495046986e-08	2.81266918307573	3.34646225522466e-07	1.02444951268199e-06	3.40802909203276	4.0206092015296e-06	1.60564401214846e-05	4.21495144958242	1.18369586571966e-08	5.11263016219546e-08	4.71655715021491	1.7619604311808e-10	9.26760761887611e-10	-3.16711012497161	6.95076080036576e-05	0.000257213543225129	-4.22170034847841
PARP4P1	0.522764049288737	0.413238836509191	0.634863984134539	2.0044542653597	0.0011481373116084	0.00312051051659924	1.56958111059026	0.0112104883500277	0.027854917584044	-1.21925644398711	0.0779111517830781	0.150932965366553	2.21608163575091	8.16148604691447e-06	2.34495900457743e-05	2.50496899601987	3.89125543683951e-05	0.000119043574023677	2.35156631065108	0.000131358125923103	0.000379876046229346	2.86065476507762	3.46313575727506e-06	1.24072186332889e-05	1.43842368846906	0.0249621002421492	0.0499231436190525	3.61865168986158	2.81255632597633e-09	1.335377657756e-08	2.74687146232177	7.72025778291645e-06	2.47795122906919e-05	1.58497823134482	0.00306599842081131	0.00644290925772414	0.399505842132964	0.582381299783516	0.773606192693786	1.74799875021685	0.0133221387794566	0.0274494792462439	2.77307167739893	7.50857080133459e-05	0.00022168671064799	0.30641871690835	0.747886530635615	0.948476818203735	1.91058462122107
[truncated: 35 more columns]
