# Supplementary material for: A Core Transcription Regulatory Circuitry Defining Microglia Cell Identity Inferred from the Reanalysis of Multiple Human Microglia Differentiation Protocols
Source: Brain Sci. 2021 Oct 11;11(10):1338. doi: 10.3390/brainsci11101338 (PMC8533937; doi:10.3390/brainsci11101338)
Supplement: Supplementary file 1 [file brainsci-11-01338-s001.zip › Supplementary_Table4_MRI_per_protocol.xlsx]

## Sheet: Feuil1
Protocol Muffat							Protocol Abud							Protocol Douvaras							Protocol McQuade							Protocol Chen							Protocol Trudler
Rank	Start Node	Yield	Rank	start node	Random Yield	SD Yield	Rank	Start Node	Yield	Rank	start node	Random Yield	SD Yield	Rank	Start Node	Yield	Rank	start node	Random Yield	SD Yield	Rank	Start Node	Yield	Rank	start node	Random Yield	SD Yield	Rank	Start Node	Yield	Rank	start node	Random Yield	SD Yield	Rank	Start Node	Yield	Rank	start node	Random Yield	SD Yield
1	FLI1	74.3143707882777	1	FLI1	27.447108603667136	0.40383910973651926	1	FLI1	72.90733723734068	1	FLI1	26.35032724767482	0.5202228520366081	1	FLI1	73.61935189411227	1	FLI1	27.269131294690396	0.41582279764750346	1	FLI1	72.64167094675568	1	FLI1	25.97329224447868	0.8709012572721739	1	FLI1	72.23168654173764	1	FLI1	25.597198561423433	0.6063697262675586	1	FLI1	72.86713286713287	1	FLI1	26.793706293706293	0.7932594780652297
2	SPI1	73.53079454630935	2	SPI1	27.279423287885912	0.6715774109775461	2	SPI1	72.54564243885635	2	SPI1	26.302101274543578	0.7544804802806858	2	SPI1	73.60413814087936	2	SPI1	27.116993762361176	0.5042710906889075	2	SPI1	71.6658106488615	2	SPI1	26.103406950864574	0.5387365585895776	2	SPI1	71.47454098050349	2	SPI1	25.710770395608556	0.5251836092645309	2	SPI1	72.15034965034965	2	SPI1	26.18881118881119	0.6779070176601573
3	TFAP2A	68.13979000156716	3	TFAP2A	27.69785300109701	0.5342680019473429	3	NR3C1	67.36135032724768	3	NR3C1	26.203926972097825	0.49937637683555247	3	FOXO3	71.53506770120188	3	FOXO3	26.911608093716715	0.6946357154848581	3	NR3C1	66.92347200821777	3	NR3C1	26.397877075843176	0.4048846582164769	3	TFAP2C	65.37951921256861	3	TFAP2C	26.05527162597009	0.6946191576672462	3	NR3C1	67.06293706293707	3	NR3C1	26.769230769230766	0.635690876225918
4	NR3C1	67.60695815702867	4	NR3C1	27.133678106879803	0.4311350130274522	4	RUNX1	65.31174646916983	4	RUNX1	26.686186703410264	0.6206794352880045	4	NR3C1	67.74684314620417	4	NR3C1	26.701658299102387	0.6027200573583562	4	RUNX1	64.47526108543057	4	RUNX1	25.774696113679163	0.8757610215433455	4	NR3C1	65.34166193450692	4	NR3C1	26.021200075714557	0.6400595507837294	4	RUNX1	64.79020979020979	4	RUNX1	26.47902097902098	0.6826335451013578
5	RUNX1	65.41294467951731	5	RUNX1	27.32173640495221	0.661524003735953	5	MAF	62.67654150878401	5	MAF	26.288322425077506	0.4479483882229551	5	RUNX1	65.61691769359501	5	RUNX1	27.345200060855007	0.5878969068853395	5	MAF	62.14689265536724	5	MAF	26.057181989385377	0.5907391215703816	5	RUNX1	63.7137989778535	5	RUNX1	25.96441415862199	0.5320294631187619	5	MAF	62.55244755244755	5	MAF	26.031468531468526	0.709454259260376
6	MAF	64.7547406362639	6	MAF	27.213602883560572	0.7300054653991437	6	VDR	62.21150533930416	6	VDR	26.358939028591113	0.5741003556596541	6	MAF	64.08032861706982	6	MAF	26.946599726152442	0.26741606624335756	6	RARA	61.80448553329909	6	RARA	26.204417051874678	0.6853362160714433	6	MAF	62.710581109218246	6	MAF	25.786484951731968	0.5099538360630924	6	FOXC1	62.48251748251749	6	FOXC1	26.064685314685313	0.42926256014538294
7	FOXC1	63.030872903933556	7	FOXC1	27.133678106879803	0.7091499192209397	7	RARA	62.0392697209783	7	RARA	26.212538753014123	0.8123041521676129	7	VDR	62.5741670470105	7	VDR	27.334550433591964	0.5817564975712151	7	VDR	61.44495805512755	7	VDR	25.92535524738915	0.7688564937913072	7	RARA	62.123793299261784	7	RARA	25.597198561423436	0.6906774812854516	7	VDR	61.52097902097901	7	VDR	26.033216783216783	0.7076619890407027
8	ELF1	62.37266886068015	8	ELF1	27.315467795016456	0.7088312281636643	8	ELF1	60.60971408887358	8	ELF1	26.414054426455387	0.6651149974413003	8	ELF1	60.70287539936102	8	ELF1	27.358892438764645	0.7320029029918931	8	ELF1	59.81852422530388	8	ELF1	25.846601609313474	0.6266635018184089	8	FOXC1	61.36664773802764	8	FOXC1	25.75430626537952	0.44182865767207113	8	ELF1	59.58041958041959	8	ELF1	26.34440559440559	0.7106358426753527
9	VDR	62.35699733584078	9	VDR	27.6633756464504	0.6321202354371758	9	RUNX2	58.45676885980021	9	RUNX2	26.755080950740613	0.5807278332311304	9	HNF4A	60.50509660733303	9	HNF4A	26.907043967746848	0.4135902957564882	9	PRDM1	57.832562917308685	9	PRDM1	26.5673686012669	0.7907232513042206	9	VDR	60.30664395229983	9	VDR	25.671020253643768	0.3855871096425889	9	KLF4	59.33566433566434	9	KLF4	26.907342657342657	0.6928218229395199
10	SOX9	59.63015201379094	10	SOX9	27.730763203259677	0.9033176215032019	10	PRDM1	58.267309679641755	10	PRDM1	26.315880124009645	0.6195911546862358	10	KLF4	60.352959075003795	10	KLF4	26.91921497033318	0.5984325531308381	10	RXRA	55.69251840438281	10	RXRA	26.074302345488785	0.7845906364750314	10	ELF1	59.58735566912738	10	ELF1	25.737270490251753	0.9107036228548069	10	PRDM1	57.98951048951049	10	PRDM1	26.279720279720284	0.44281529236050565
11	NFE2L2	59.5988089641122	11	NFE2L2	27.56307788747845	0.658979699830598	11	PPARG	56.73441267654151	11	PPARG	26.217705821563904	0.8281578569362841	11	RUNX2	59.07500380343831	11	RUNX2	27.0530959987829	0.5961695126803155	11	IRF9	53.84351994521486	11	IRF9	25.928779318609827	0.376745096467478	11	KLF4	59.39806927881885	11	KLF4	25.71644898731781	0.4414230050243706	11	NFE2L2	57.72727272727273	11	NFE2L2	26.94405594405594	0.7270205318515288
12	RUNX2	58.97194797053753	12	RUNX2	27.003604450713055	0.5815149418399097	12	RXRA	56.321047192559426	12	RXRA	26.362383740957632	0.7394185624797589	12	PRDM1	58.52730868705309	12	PRDM1	26.709265175718848	0.5919772846182039	12	SPIB	52.33692860811505	12	SPIB	25.75243965074473	0.9966576743182533	12	HIC1	57.99734999053568	12	HIC1	25.83948514101836	0.7354184301978055	12	PPARG	56.83566433566434	12	PPARG	25.921328671328673	0.587373562639758
13	PRDM1	58.86224729666196	13	PRDM1	27.567779344930265	0.7363098797068991	13	IRF9	54.30589045814674	13	IRF9	26.68446434722701	0.6537720135842061	13	RXRA	57.15807089609007	13	RXRA	26.975505857294998	0.5278295425602291	13	ETS2	50.4879301489471	13	ETS2	26.10169491525424	0.7506138937795457	13	PRDM1	57.20234715123983	13	PRDM1	25.510126821881506	0.6582187574517608	13	PPARA	54.58041958041958	13	PPARA	26.39160839160839	0.5583577808303211
14	PPARG	57.95329885597869	14	PPARG	27.538003447735463	0.7134865077937573	14	NR2F1	52.531863589390284	14	NR2F1	26.15742335514985	0.6763423210658072	14	PPARG	57.14285714285714	14	PPARG	27.043967746843144	0.561434906428832	14	MEF2A	49.717514124293785	14	MEF2A	26.15819209039548	0.4618341008829575	14	PPARG	55.839485141018365	14	PPARG	25.549876963846298	0.7998464350520978	14	IRF9	53.65384615384615	14	IRF9	26.716783216783217	0.4553382005864396
15	FOXL1	55.60257013007366	15	FOXL1	27.643002664159223	0.616409104698886	15	ETS2	50.49948329314502	15	ETS2	26.231484671029968	0.4591945004335666	15	PPARA	55.04335919671382	15	PPARA	27.060702875399365	0.6100715046401949	15	NFIC	48.45060777264167	15	NFIC	26.079438452319813	0.5923272094168613	15	IRF9	53.454476623130795	15	IRF9	25.640734431194392	0.6776981485353855	15	WT1	50.75174825174825	15	WT1	26.477272727272727	0.6567588725965676
16	POU3F2	54.77197931358722	16	POU3F2	27.150916784203105	0.717962822482103	16	MEF2A	50.034447123665174	16	MEF2A	26.28143300034447	0.735728389544162	16	IRF9	54.86079415791876	16	IRF9	26.907043967746848	0.5195981185420976	16	IRF1	47.95411744564287	16	IRF1	26.230097586029792	0.7727124366498077	16	FOXL1	53.30304751088397	16	FOXL1	25.58584137800492	0.8482501634152905	16	MEF2A	50.47202797202798	16	MEF2A	26.601398601398603	0.5604885289374519
17	IRF9	54.61526406519355	17	IRF9	27.522331922896097	0.3744674706486104	17	FOXG1	49.82776438167413	17	FOXG1	25.988632449190494	0.7464958750077975	17	MEF2A	51.0421420964552	17	MEF2A	27.089609006541917	0.6396727435605248	17	ZEB1	47.54322889916111	17	ZEB1	25.67368601266906	0.5484502804362522	17	JDP2	50.539466212379324	17	JDP2	25.63127011167897	0.3373814198822603	17	GATA1	50.41958041958042	17	GATA1	26.26398601398601	0.6214561615839831
18	TFAP2B	54.58392101551481	18	TFAP2B	27.285691897821657	0.4870013021849718	18	POU3F3	49.707199448846026	18	POU3F3	26.205649328281094	0.3593290741478648	18	EBF1	50.43359196713829	18	EBF1	27.063745626045943	0.4832827777451019	18	TAL1	46.70433145009416	18	TAL1	25.971580208868346	0.4402961511088601	18	FOXC2	49.32803331440469	18	FOXC2	26.087450312322545	0.6544931077444136	18	FOXA1	49.23076923076923	18	FOXA1	26.335664335664337	0.7577093301646303
19	NR2F1	54.31750509324558	19	NR2F1	27.37658674188999	0.48836102471442994	19	NFIC	49.25938684119876	19	NFIC	26.495005167068552	0.5859581290930254	19	NFIC	49.703331811958016	19	NFIC	27.002890613114253	0.43536062866939007	19	STAT6	46.61872966957713	19	STAT6	26.11196712891628	0.6097250843074958	19	ETS2	49.10088964603445	19	ETS2	26.013628620102217	0.657183701741157	19	NFIC	48.77622377622377	19	NFIC	26.113636363636363	0.6732040566518549
20	EBF1	51.2772292744084	20	EBF1	27.223005798464193	0.4438916185901992	20	IRF1	49.08715122287289	20	IRF1	26.42438856355495	0.2788728163693989	20	IRF1	48.957857903544806	20	IRF1	26.94051422485927	0.6094166962615232	20	IRF8	46.13935969868173	20	IRF8	25.856873822975512	0.5923272094168601	20	FOXA1	48.43838727995457	20	FOXA1	25.68237743706228	0.5250983242176922	20	IRF1	48.26923076923077	20	IRF1	26.304195804195803	0.37309510969494447
21	FOXC2	50.948127252781696	21	FOXC2	27.522331922896097	0.5226776587612659	21	ZEB1	47.57147778160524	21	ZEB1	26.219428177747155	0.5652399331622311	21	BACH1	48.4862315533242	21	BACH1	26.607333029058264	0.6493065192765209	21	POU2F2	45.591508303372706	21	POU2F2	26.254066084574553	0.820429543435411	21	FOXB1	47.96517130418323	21	FOXB1	25.773234904410366	0.33873274212784393	21	RARB	47.98951048951049	21	RARB	26.475524475524473	0.5960077133611896
22	MEF2A	50.916784203102964	22	MEF2A	27.395392571697226	0.5039047158360371	22	TAL1	47.33034791594902	22	TAL1	26.290044781260764	0.6116765574346655	22	ZEB1	48.02981895633653	22	ZEB1	27.22196865966834	0.6886992356530277	22	IRF7	44.76973121040918	22	IRF7	25.56069166238658	0.658900209220466	22	IRF1	47.87052810902896	22	IRF1	25.580162786295666	0.6268323917719245	22	ELF5	47.76223776223777	22	ELF5	26.421328671328673	0.45723050420146055
23	POU3F3	50.50932455727942	23	POU3F3	27.141513869299484	0.5894847765914965	23	ESR1	47.123665173957974	23	ESR1	26.61901481226318	0.5046386048603524	23	ESR1	47.740757644911	23	ESR1	27.01201886505401	0.7315664187995831	23	MAFB	44.13627803458312	23	MAFB	26.177024482109225	0.5639331995206507	23	RARB	47.15123982585652	23	RARB	25.583948514101834	0.23765808995978813	23	TAL1	47.51748251748252	23	TAL1	26.921328671328666	0.5047847980156414
24	NFIC	50.336937784046384	24	NFIC	27.708823068484566	0.5150403185735413	24	STAT6	47.10644161212539	24	STAT6	26.315880124009645	0.32208060626937685	24	STAT6	47.4060550737867	24	STAT6	27.089609006541917	0.5506117717687075	24	MEIS1	43.451463790446844	24	MEIS1	26.026365348399246	0.7033862416209704	24	ZEB1	47.13231118682567	24	ZEB1	25.939806927881886	0.8696550976495362	24	ZEB1	47.22027972027972	24	ZEB1	26.65734265734266	0.6170511445721888
25	FOXA1	49.412317818523746	25	FOXA1	27.080394922425956	0.48566558642297714	25	IRF8	46.79641749913882	25	IRF8	26.341715466758522	0.49550005214206694	25	IRF8	47.299558801156245	25	IRF8	26.837060702875398	0.877452475815457	25	NR4A2	42.869371682931	25	NR4A2	26.233521657250474	0.46704695444516636	25	ELF5	46.96195343554798	25	ELF5	25.652091614612907	0.8521588360456698	25	ESR1	47.0979020979021	25	ESR1	26.47552447552448	0.6824544279024253
26	ZEB1	48.801128349788435	26	ZEB1	27.39382541921329	0.7154184115664215	26	POU2F2	46.00413365483982	26	POU2F2	26.710299689975887	0.40413391322252723	26	ZFX	47.01049748973072	26	ZFX	27.428875703636088	0.6091754736176364	26	NFKB1	42.68104776579353	26	NFKB1	25.985276493751066	0.6235101128562511	26	STAT6	46.56445201590005	26	STAT6	25.951164111300397	0.6155155687044179	26	SOX7	46.81818181818182	26	SOX7	26.416083916083913	0.7204833713050268
27	MYOD1	48.801128349788435	27	MYOD1	27.71509167842031	0.4785463763607109	27	IRF7	45.229073372373406	27	IRF7	26.364106097140887	0.49501187905827587	27	IRF7	45.77818347786399	27	IRF7	26.910086718393426	0.6831229324136534	27	ETV6	41.08885464817668	27	ETV6	25.69765451121383	0.7307404404596598	27	ZFX	45.182661366647736	27	ZFX	25.623698656066626	0.4142778172038263	27	STAT6	46.57342657342657	27	STAT6	25.968531468531467	0.5840416932859387
28	IRF1	48.70709920075223	28	IRF1	27.27158752546623	0.6003564603942255	28	MAFB	45.03961419221495	28	MAFB	26.15053393041681	0.7899608743657721	28	MAFB	45.7173284649323	28	MAFB	27.130686140270804	0.544390949420673	28	RFX2	40.66084574559151	28	RFX2	25.850025680534156	0.3727719205175156	28	IRF7	44.27408669316676	28	IRF7	25.93034260836646	0.5182749856242778	28	IRF8	46.36363636363636	28	IRF8	26.026223776223777	0.5612977259623642
29	RARB	48.5817270020373	29	RARB	27.787180692681403	0.8627725970099003	29	MAX	43.79951774026869	29	MAX	26.109197382018607	0.5995902601014341	29	MAFK	45.59561843906892	29	MAFK	27.171763273999698	0.4517229529261071	29	IKZF1	40.421160760143806	29	IKZF1	25.89282657079267	0.558669512864763	29	GATA3	43.725156161272004	29	GATA3	25.691841756577695	0.6719560214886967	29	POU2F2	46.03146853146853	29	POU2F2	26.606643356643353	0.7042851208279423
30	ESR1	48.51904090267983	30	ESR1	27.32330355743614	0.5612178508429516	30	MEIS1	43.57561143644506	30	MEIS1	26.290044781260768	0.5957062116278976	30	MEIS1	44.15031188194127	30	MEIS1	26.984634109234747	0.4196928297205293	30	IRF2	38.26399589111453	30	IRF2	25.824345146379038	0.7831772347306856	30	MAFB	43.687298883210296	30	MAFB	25.862199507855383	0.5795410194145322	30	MAFK	45.52447552447552	30	MAFK	26.407342657342657	0.8020742005143386
31	TAL1	48.22128193073186	31	TAL1	27.193229901269387	0.5261899707615333	31	NFKB1	43.31725800895625	31	NFKB1	26.586290044781258	0.46784723413860896	31	NR4A2	43.90689183021451	31	NR4A2	26.627110908261074	0.4033682160673814	31	CEBPB	37.699024139702104	31	CEBPB	26.065742167437083	0.4934257710788071	31	MEIS1	43.157296990346396	31	MEIS1	25.76566344879803	0.5859812619888316	31	MAFB	44.77272727272727	31	MAFB	26.465034965034967	0.7746471735150698
32	IRF8	47.39069111424541	32	IRF8	27.21203573107664	0.5418450959813758	32	NR4A2	43.300034447123664	32	NR4A2	26.512228728901142	0.6868315058489738	32	NFKB1	43.13099041533546	32	NFKB1	27.05918150007607	0.4677926071134069	32	LMO2	37.61342235918507	32	LMO2	25.778120184899848	0.5392259929088499	32	NFKB1	42.51372326329737	32	NFKB1	25.209161461290936	0.6543288562027546	32	GATA3	44.45804195804196	32	GATA3	26.465034965034967	0.591870364718667
33	NR2E1	46.936216893903776	33	NR2E1	27.412631249020528	0.6119444502978381	33	RFX4	42.214950051670684	33	RFX4	26.34343782294178	0.5950609752530903	33	ETV6	43.13099041533546	33	ETV6	26.904001217100255	0.49495930110444725	33	GATA4	37.37373737373738	33	GATA4	25.593220338983052	0.8488123381829017	33	SPDEF	40.99943214082907	33	SPDEF	25.62369865606663	0.8762978634201465	33	MEIS1	44.12587412587413	33	MEIS1	26.82342657342657	0.8178773116933478
34	IRF7	45.604137282557595	34	IRF7	27.45651151857076	0.43362290814659205	34	ETV6	42.008267309679646	34	ETV6	26.412332070272136	0.7505304173964363	34	RFX4	42.99406663623916	34	RFX4	27.077438003955574	0.46204747158275955	34	ZNF740	37.09981167608286	34	ZNF740	26.1462078411231	0.5953257663849444	34	RFX2	40.8669316676131	34	RFX2	26.20859360212001	0.41403125800245694	34	NFKB1	43.35664335664335	34	NFKB1	26.529720279720284	0.439521059561022
35	MAFB	45.541451183200124	35	MAFB	27.158752546622786	0.4924450959111356	35	IKZF1	40.682053048570445	35	IKZF1	26.279710644161213	0.646780867123084	35	RFX2	41.853035143769965	35	RFX2	26.9557279780922	0.4638473516853713	35	RUNX3	36.65468241739428	35	RUNX3	25.954459852764938	0.6083390374268968	35	IKZF1	40.60193072118115	35	IKZF1	25.305697520348286	0.3263694802219396	35	NKX2-5	42.04545454545455	35	NKX2-5	26.328671328671327	0.556482564540776
36	MEIS1	45.369064409967095	36	MEIS1	27.155618241654917	0.7722993586603137	36	GFI1	39.596968653117464	36	GFI1	26.43127798828798	0.6543684268759717	36	IKZF1	41.50311881941275	36	IKZF1	27.36041381408794	0.8811955066892084	36	REL	35.52473891456942	36	REL	25.683958226331107	0.5860465694290878	36	POU2F3	39.78799924285444	36	POU2F3	25.49309104675374	0.4654906033464932	36	TBX20	41.34615384615385	36	TBX20	26.064685314685317	0.5464762038561212
37	GATA3	45.118320012537225	37	GATA3	27.771509167842034	0.7629457784643592	37	IRF2	38.821908370651045	37	IRF2	26.396830864622803	0.4094138828701623	37	RELA	40.33165982047771	37	RELA	27.11395101171459	0.6679097580253224	37	MSX2	33.983906865262796	37	MSX2	26.0075329566855	0.45762618992945675	37	IRF2	38.595494983910655	37	IRF2	25.572591330683327	0.5335727843699113	37	IKZF1	40.4020979020979	37	IKZF1	26.017482517482517	0.5231217960633586
38	MAX	44.31907224572951	38	MAX	27.6461369691271	0.39580762131192176	38	GATA4	38.322425077506026	38	GATA4	25.950740613158803	0.5440601219818694	38	IRF2	39.860033470257115	38	IRF2	26.946599726152442	0.6149744574637381	38	ASCL2	33.88118472864235	38	ASCL2	26.06745420304742	0.6424218297653275	38	LMO2	37.5544198372137	38	LMO2	25.888699602498583	0.5830543179373804	38	GFI1	40.38461538461539	38	GFI1	26.360139860139856	0.5336493716987949
39	NFKB1	43.91161259990597	39	NFKB1	27.450242908635012	0.7513903756754782	39	CEBPB	38.2190837065105	39	CEBPB	26.729245607991732	0.40550058983084475	39	GFI1	39.814392210558346	39	GFI1	27.083523505248746	0.32777077156842177	39	CEBPA	33.11076870398904	39	CEBPA	26.170176339667865	0.6283520551247349	39	ZNF740	36.36191557826992	39	ZNF740	25.697520348286957	0.3254625224978507	39	IRF2	39.17832167832167	39	IRF2	25.968531468531467	0.792295656590826
40	RFX4	43.34743770568876	40	RFX4	27.434571383795646	0.7993153666051086	40	LMO2	37.97795384085429	40	LMO2	26.284877712710987	0.5173064611452791	40	CEBPB	38.916780769815915	40	CEBPB	26.847710330138447	0.30835917216785963	40	EGR3	31.467214518061976	40	EGR3	26.16161616161616	0.8895816767812332	40	RUNX3	36.19155782699224	40	RUNX3	25.494983910656824	0.5047562148475389	40	CEBPB	38.1993006993007	40	CEBPB	26.24125874125874	0.6806067775178328
41	FOXJ1	42.67356213759599	41	FOXJ1	27.251214543175053	0.40006612881062265	41	ZNF740	37.51291767137444	41	ZNF740	26.284877712710987	0.6857681781056475	41	LMO2	38.20173436786855	41	LMO2	27.275216795983567	0.4842086191275249	41	EGR2	29.464132853963363	41	EGR2	26.03834959767163	0.46138962657175203	41	KLF14	35.64262729509748	41	KLF14	25.818663638084427	0.5423641409007929	41	GATA4	37.84965034965035	41	GATA4	26.38986013986014	0.316935428628757
42	TBX1	42.43848926500549	42	TBX1	27.273154677950163	0.5859578736501261	42	RUNX3	36.82397519807096	42	RUNX3	26.252152945229074	0.6985550545069947	42	TBX21	38.095238095238095	42	TBX21	27.176327399969573	0.5812390479991897	42	TFCP2L1	28.197226502311246	42	TFCP2L1	25.903098784454716	0.7129965463349632	42	PKNOX2	34.90441037289419	42	PKNOX2	25.394662123793296	0.5914222898716642	42	LMO2	37.79720279720279	42	LMO2	26.222027972027973	0.452824202019254
43	RFX2	42.26610249177245	43	RFX2	27.50666039805673	0.8457339879606137	43	REL	35.945573544609026	43	REL	26.026524285222184	0.7796187759480263	43	HOXA9	37.836604290278416	43	HOXA9	26.69709417313252	0.43148092435125573	43	AHR	27.700736175312446	43	AHR	26.05204588255436	0.6613002101786057	43	CEBPA	33.04940374787053	43	CEBPA	25.640734431194396	0.49938614430621947	43	HOXA9	37.76223776223776	43	HOXA9	26.195804195804197	0.5381208621688397
44	ZIC1	42.17207334273625	44	ZIC1	27.52076477041216	0.5204952004048896	44	ASCL2	34.808818463658284	44	ASCL2	26.234929383396484	0.6053193790812594	44	RUNX3	37.80617678381257	44	RUNX3	26.961813479385363	0.5023211787563359	44	ITGB2	26.82759801403869	44	ITGB2	26.26947440506762	0.4887674269489608	44	MSX2	32.462615937914066	44	MSX2	25.90194964982018	0.4574468964396549	44	TBX21	37.5	44	TBX21	26.391608391608393	0.51484158846747
45	PAX6	41.56088387400094	45	PAX6	27.367183826986366	0.642419749985884	45	MSX2	34.15432311401998	45	MSX2	26.46572511195315	0.5016877955288246	45	ETV7	37.74532177088087	45	ETV7	27.270652670013693	0.41865473621837884	45	IRF4	23.711693203218626	45	IRF4	26.257490155795246	0.6404500741357724	45	EGR3	32.254400908574674	45	EGR3	25.703198939996213	0.47180938026060243	45	RUNX3	36.5034965034965	45	RUNX3	26.09440559440559	0.37562603619417434
46	IKZF1	40.90267983074753	46	IKZF1	27.486287415765553	0.6309399497068254	46	CEBPA	33.80985187736824	46	CEBPA	26.37788494660696	0.7536464652183025	46	REL	36.22394644758862	46	REL	27.176327399969573	0.4910555553395206	46	FOXD2	23.643211778805	46	FOXD2	26.171888375278208	0.5733172460136194	46	MEIS2	31.478326708309673	46	MEIS2	25.652091614612907	0.6992230034507179	46	REL	35.472027972027966	46	REL	26.43181818181818	0.8310156123786231
47	RELA	40.27581883717286	47	RELA	27.229274408399938	0.2740725230270177	47	EGR3	31.69135377196004	47	EGR3	26.460558043403374	0.5122120494573883	47	MSX1	35.00684618895482	47	MSX1	27.247832040164308	0.8099662770128168	47	PLAGL1	21.931176168464305	47	PLAGL1	26.0160931347372	0.7422893627064413	47	NKX3-1	31.19439712284687	47	NKX3-1	25.555555555555554	0.7341018207623377	47	ASCL2	34.00349650349651	47	ASCL2	26.645104895104897	0.5136677812229198
48	SOX1	39.962388340385516	48	SOX1	27.462780128506505	0.4229105509461311	48	STAT5A	31.088529107819497	48	STAT5A	26.279710644161213	0.8998153131148503	48	ASCL2	34.76342613722805	48	ASCL2	27.124600638977633	0.7473484320047229	48	KLF13	21.160760143810993	48	KLF13	26.341379900701934	0.4809083345352966	48	ZBTB18	30.777967064168088	48	ZBTB18	25.837592277115277	0.4828843845214724	48	MSX2	33.82867132867133	48	MSX2	26.13986013986014	0.42102025679138894
49	IRF2	39.46089954552578	49	IRF2	27.362482369534554	0.4379623448513453	49	EGR2	29.624526352049603	49	EGR2	26.625904236996213	0.7908016058892349	49	HOXA10	34.489578579035445	49	HOXA10	26.904001217100262	0.44689089130127996	49	EHF	20.732751241225817	49	EHF	25.95959595959596	0.6611228953135568	49	THRB	30.17225061518077	49	THRB	25.947378383494225	0.45960357102112015	49	CEBPA	33.04195804195804	49	CEBPA	26.671328671328673	0.5452864184137626
50	HOXA9	38.881053126469205	50	HOXA9	27.113305124588624	0.49663900430230645	50	TFCP2L1	28.9700310024113	50	TFCP2L1	25.71477781605236	0.46922748556488314	50	CEBPA	33.31811958010041	50	CEBPA	27.161113646736652	0.7761116941501345	50	ARNTL	19.962335216572505	50	ARNTL	26.15819209039548	0.6645455385216917	50	FOXQ1	28.733674048835887	50	FOXQ1	25.27351883399583	0.4798176647436636	50	HOXA10	32.98951048951049	50	HOXA10	26.486013986013983	0.7192945941607709
51	LMO2	38.77135245259364	51	LMO2	27.302930575144966	0.7791065120323021	51	AHR	28.108852910781952	51	AHR	26.32965897347571	0.6302529377780715	51	PGR	32.024950555302	51	PGR	26.907043967746848	0.7983147918881921	51	HOXB9	19.551446670090737	51	HOXB9	26.139359698681726	0.5722298153329094	51	HOXC13	28.449744463373083	51	HOXC13	25.873556691273897	0.5838771822155095	51	NR1H4	32.43006993006993	51	NR1H4	26.38111888111888	0.3274415319844244
52	CEBPB	38.66165177871807	52	CEBPB	27.37188528443818	0.807325412636381	52	MEF2D	27.540475370306577	52	MEF2D	26.145366861867036	0.5402271139708665	52	FOXK1	31.903240529438616	52	FOXK1	26.762513312034077	0.7199320998984485	52	CEBPD	19.41448382126348	52	CEBPD	26.329395651429547	0.261269199234806	52	POU4F3	27.900813931478325	52	POU4F3	25.419269354533405	0.5518242083807047	52	EGR3	31.74825174825175	52	EGR3	26.1993006993007	0.47423725407513145
53	TBX21	38.3638928067701	53	TBX21	27.511361855508547	0.5694286882627853	53	ITGB2	27.12710988632449	53	ITGB2	26.37271787805718	0.4466717495488929	53	STAT5A	31.903240529438616	53	STAT5A	27.325422181652215	0.5740425500208467	53	HOXB5	19.24328026022941	53	HOXB5	25.824345146379045	0.9509799191557585	53	AHR	27.76831345826235	53	AHR	25.64262729509748	0.70642380793276	53	FOXK1	31.590909090909093	53	FOXK1	26.35839160839161	0.6977276888732675
54	ETV7	37.79971791255289	54	ETV7	27.202632816173015	0.723705519471164	54	NKX2-2	26.042025490871513	54	NKX2-2	26.024801929038926	0.6377371195857261	54	THRB	30.70135402403773	54	THRB	27.176327399969573	0.6161870570587763	54	IRF5	19.054956343091938	54	IRF5	26.368772470467384	0.7240433192622406	54	HNF1B	27.616884346015517	54	HNF1B	25.89627105811092	0.6483134858508651	54	STAT5A	31.416083916083913	54	STAT5A	26.19230769230769	0.45834880022864083
55	NKX6-1	37.15718539413885	55	NKX6-1	27.205767121140884	0.575680618531866	55	FOXD2	23.49293833964864	55	FOXD2	26.42783327592146	0.7214267285432593	55	EGR2	30.503575232009737	55	EGR2	26.993762361174504	0.7778097365508609	55	ELF4	18.81527135764424	55	ELF4	26.190720766991955	0.4367402506417446	55	BARX1	26.935453340904793	55	BARX1	26.00795002839296	0.6645003807678251	55	MEIS2	31.258741258741257	55	MEIS2	25.89160839160839	0.6404426253151818
56	RUNX3	36.93778404638771	56	RUNX3	27.324870709920077	0.7571211925270457	56	IRF4	23.406820530485707	56	IRF4	26.26937650706166	0.3694684857813813	56	ISX	28.830062376388256	56	ISX	27.55514985546934	0.7781593109696663	56	LBX2	18.661188152713574	56	LBX2	26.03834959767163	0.6522586057918689	56	ITGB2	26.594737838349424	56	ITGB2	25.50823395797842	0.4828250220054775	56	EGR2	29.44055944055944	56	EGR2	26.209790209790214	0.5831828233811588
57	ALX1	35.79376273311393	57	ALX1	27.33270647233976	0.7499917632557537	57	PLAGL1	22.493971753358593	57	PLAGL1	26.426110919738203	0.6537720135842054	57	POU4F3	28.81484862315533	57	POU4F3	27.284345047923324	0.40971063981470357	57	MESP1	17.80517034754323	57	MESP1	25.63773326485191	0.6624604490308469	57	CDX1	25.25080446715881	57	CDX1	25.790270679538146	0.648523460563707	57	TFCP2L1	29.03846153846154	57	TFCP2L1	26.32342657342657	0.6691512071725951
58	HOXD9	35.51167528600533	58	HOXD9	27.161886851590662	0.41751012832714	58	ZBTB16	21.184981054081984	58	ZBTB16	26.53978642783328	0.6141570519888881	58	ALX4	28.236726000304273	58	ALX4	26.8568385820782	0.47941672269864566	58	ZNF524	17.702448210922785	58	ZNF524	26.117103235747305	0.8133250362890473	58	IRF4	23.414726481166003	58	IRF4	25.801627862956657	0.7038018249325865	58	HAND1	28.688811188811187	58	HAND1	26.372377622377627	0.6924599853684668
59	PKNOX2	35.480332236326596	59	PKNOX2	27.533301990283654	0.6324562232472848	59	DLX1	21.133310368584223	59	DLX1	26.26420943851188	0.416614428080631	59	AHR	27.886809675947056	59	AHR	27.27825954663016	0.49904821137552813	59	CREB5	16.89779147406266	59	CREB5	25.757575757575758	0.5905530287865058	59	FOXD2	23.263297368919176	59	FOXD2	26.053378762067005	0.897832260542422	59	GATA5	27.84965034965035	59	GATA5	26.185314685314683	0.8030091579557296
60	ASCL2	35.417646136969125	60	ASCL2	27.10703651465288	0.5340312100554551	60	HSF4	20.909404064760594	60	HSF4	26.246985876679297	0.7856077965551569	60	ITGB2	27.110908261068005	60	ITGB2	27.048531872813026	0.5028576979990179	60	HOXB3	16.760828625235405	60	HOXB3	26.32597158020887	0.6291841508786365	60	PRRX1	23.206511451826614	60	PRRX1	25.807306454665913	0.6765869850587838	60	ZBTB7A	27.814685314685317	60	ZBTB7A	26.354895104895103	0.6520416556480716
61	EN1	35.29227393825419	61	EN1	27.671211408870086	0.8759541296984759	61	EHF	20.75439200826731	61	EHF	26.095418532552532	0.9488119269088006	61	HOXA5	25.756884223337895	61	HOXA5	26.83249657690552	0.7367620309631966	61	BATF3	16.538263995891114	61	BATF3	26.372196541688066	0.7428814291436129	61	GATA6	22.809010032178687	61	GATA6	25.625591519969714	0.7102554055084411	61	AHR	27.62237762237762	61	AHR	26.213286713286713	0.7855936088120045
62	MSX1	34.99451496630622	62	MSX1	27.1979313587212	0.6508967440760712	62	ARNTL	20.151567344126768	62	ARNTL	26.298656562177058	0.3876985128168513	62	PAX5	25.148334094020996	62	PAX5	27.151985394796895	0.29438121101305453	62	IKZF3	15.904810820065057	62	IKZF3	25.94247560349255	0.602677875190968	62	PAX2	22.184364944160514	62	PAX2	25.625591519969714	0.8972973541832231	62	ALX4	27.430069930069926	62	ALX4	26.407342657342657	0.8781463484751899
63	CPEB1	34.916157342109386	63	CPEB1	27.315467795016456	0.6385449287646423	63	CEBPD	19.66930761281433	63	CEBPD	26.67757492249397	0.6004801611247689	63	PITX1	24.35721892590902	63	PITX1	27.209797657082003	0.6576583678554514	63	TFEB	15.699366546824173	63	TFEB	26.486902927580893	0.4518898453738915	63	NFIA	22.14650766609881	63	NFIA	25.81487791027825	0.33953567783121297	63	ITGB2	26.765734265734263	63	ITGB2	26.426573426573423	0.6560115223180568
64	MSX2	34.618398370161415	64	MSX2	27.265318915530486	0.41438072147888355	64	ELF4	19.152600757836723	64	ELF4	26.55873234584912	0.48526449391142584	64	IRF4	24.144226380648107	64	IRF4	27.22044728434505	0.4572637734774179	64	ZBTB7B	15.545283341893512	64	ZBTB7B	25.7216230097586	0.6435159042369887	64	PLAGL1	21.578648495173198	64	PLAGL1	25.652091614612903	0.7188797070256163	64	CDX1	25.54195804195804	64	CDX1	26.3006993006993	0.8702431249277044
65	RXRG	34.00720890142611	65	RXRG	27.60068954709293	0.6340986345161266	65	LBX2	18.739235273854632	65	LBX2	26.505339304168103	0.48271778355269007	65	FOXD2	23.946447588620114	65	FOXD2	27.091130381865206	0.6378918277331901	65	TFEC	14.963191234377677	65	TFEC	25.699366546824177	0.7227730970570927	65	ZIC4	20.8404315729699	65	ZIC4	25.392769259890212	0.6655375162502043	65	HOXA5	25.419580419580416	65	HOXA5	26.269230769230766	0.4676826671138085
66	HOXA10	33.490048581727	66	HOXA10	27.475317348378002	0.7085470566215845	66	IRF5	18.68756458835687	66	IRF5	26.395108508439545	0.513438393770735	66	PAX2	23.733455043359196	66	PAX2	26.87205233531112	0.45944779107217126	66	BHLHE40	14.860469097757234	66	BHLHE40	25.88255435713063	0.6155619215851519	66	ARNTL	20.82150293393905	66	ARNTL	25.67669884535302	0.5700789474292324	66	NFATC1	25.122377622377623	66	NFATC1	26.590909090909086	0.688287401574459
67	CEBPA	33.45870553204826	67	CEBPA	27.827926657263752	0.5873393974967073	67	ZNF524	18.256975542542197	67	ZNF524	26.517395797450916	0.7437388479265923	67	ATF3	23.718241290126272	67	ATF3	27.193062528525786	0.5842239715889027	67	HERPUD1	14.757746961136792	67	HERPUD1	26.236945728471152	0.5659695577303544	67	EHF	20.651145182661367	67	EHF	25.55744841945864	0.5524958137781708	67	HOXD11	24.597902097902097	67	HOXD11	26.38111888111888	0.38342154194862477
68	MEOX2	33.019902836545995	68	MEOX2	27.138379564331608	0.6013885123824521	68	MESP1	17.723045125732	68	MESP1	26.117809162934897	0.6265779346801338	68	PRRX1	23.70302753689335	68	PRRX1	26.97702723261829	0.7514978130395465	68	FIGLA	14.26125663413799	68	FIGLA	26.084574559150827	0.900250772954881	68	POU4F1	20.61328790459966	68	POU4F1	25.583948514101834	0.7231731070102922	68	NKX2-3	24.23076923076923	68	NKX2-3	26.328671328671327	0.41972608194189087
69	NR1H4	32.173640495220184	69	NR1H4	27.34210938724338	0.4270051981066115	69	CREB5	17.10299689975887	69	CREB5	26.491560454702032	0.6013687452805897	69	NFIA	22.80541609615092	69	NFIA	27.063745626045943	0.5447904619131243	69	HLX	13.251155624036981	69	HLX	26.461222393425782	0.6699377132464422	69	MNX1	20.15900056785917	69	MNX1	25.555555555555554	0.5369498080637182	69	PITX1	23.828671328671327	69	PITX1	26.625874125874127	0.41606922463338436
70	MEIS2	32.12662592070208	70	MEIS2	27.575615107349943	0.4517206598958087	70	BATF3	16.87909059593524	70	BATF3	26.601791250430587	0.5406799505760523	70	TBR1	22.227293473299863	70	TBR1	27.602312490491407	0.5169565293640891	70	NOBOX	13.251155624036981	70	NOBOX	25.93733949666153	0.6531814119578295	70	TFAP2E	19.875070982396366	70	TFAP2E	25.843270868824533	0.33187793928040643	70	FOXF1	23.67132867132867	70	FOXF1	26.53321678321678	0.47112384273345836
71	STAT5A	31.922896097790314	71	STAT5A	27.552107820090896	0.5589024736481564	71	HOXB3	16.448501550120564	71	HOXB3	26.381329658973478	0.5660790276138887	71	HSF4	21.831735889243873	71	HSF4	27.33759318423855	0.9121771115892803	71	ARID5A	12.823146721451806	71	ARID5A	26.168464304057522	0.5519157787986598	71	PITX2	19.83721370433466	71	PITX2	25.67291311754685	0.4527902963065703	71	IRF4	23.6013986013986	71	IRF4	26.38111888111888	0.5865899167658514
72	FOXD1	31.01394765710704	72	FOXD1	27.04905187274722	0.6687170213117489	72	PAX8	16.293489493627284	72	PAX8	26.36582845332415	0.3544707778887189	72	PLAGL1	21.710025863380498	72	PLAGL1	26.849231705461733	0.6604871852056104	72	BHLHE41	12.01848998459168	72	BHLHE41	25.877418250299606	0.6313791427944117	72	CEBPD	19.212568616316485	72	CEBPD	25.17130418322923	0.6124109517322166	72	HOXD8	23.583916083916083	72	HOXD8	26.39160839160839	0.4106866254552728
73	EGR2	30.935590032910206	73	EGR2	26.99733584077731	0.26308098264941665	73	TFEB	16.172924560799174	73	TFEB	26.439889769204267	0.6546970155433166	73	MAFF	21.375323292256198	73	MAFF	27.4653887113951	0.8274114074328547	73	ARID5B	10.22085259373395	73	ARID5B	26.017805170347543	0.6428254864493413	73	ELF4	18.83399583569941	73	ELF4	26.095021767934885	0.7865845998064332	73	NFKB2	23.304195804195803	73	NFKB2	26.082167832167833	0.4663246483791643
74	FOXQ1	29.619181946403383	74	FOXQ1	27.237110170819626	0.3713853814411194	74	ZBTB7B	15.914571133310368	74	ZBTB7B	25.897347571477788	0.6446399785852366	74	ARNTL	21.101475734063595	74	ARNTL	27.12764338962422	0.5736392007695884	74	ETV5	9.724362266735149	74	ETV5	26.076014381099128	0.4468675316222751	74	LBX2	18.60685216732917	74	LBX2	25.66534166193451	0.6984872987870167	74	GATA6	23.26923076923077	74	GATA6	26.671328671328673	0.9021792124682587
75	AHR	29.211722300579844	75	AHR	27.52076477041216	0.4852836395681183	75	BHLHE40	15.466758525663108	75	BHLHE40	26.155700998966587	0.44490163866607524	75	EHF	21.055834474364826	75	EHF	27.021147116993763	0.8297132454811743	75	HOXB4	9.70724191063174	75	HOXB4	26.091422701592194	0.509312610191527	75	MESP1	18.114707552526973	75	MESP1	25.417376490630318	0.3616113249671641	75	FOXD2	23.164335664335663	75	FOXD2	26.18181818181818	0.6368149479329921
76	HMX3	28.3341169095753	76	HMX3	27.13524525936374	0.429768532246478	76	HERPUD1	15.208405098174302	76	HERPUD1	26.07647261453669	0.37339792264345206	76	ZBTB16	20.751559409706374	76	ZBTB16	27.124600638977636	0.565307122611108	76	HOXB7	9.142270159219311	76	HOXB7	26.284882725560692	0.7407022695013704	76	ZNF524	17.603634298693922	76	ZNF524	25.93412833617263	0.4318427017391992	76	PRRX1	23.094405594405597	76	PRRX1	26.82517482517482	0.48089318173298434
77	ITGB2	27.66024134148253	77	ITGB2	27.367183826986366	0.7240871988008813	77	TFEC	15.156734412676542	77	TFEC	26.627626593179475	0.5383568587009234	77	EMX2	20.158223033622395	77	EMX2	26.621025406967895	0.7030927051010614	77	HOXB6	8.30337271015237	77	HOXB6	25.824345146379045	0.6354489491128029	77	TFEB	16.202915010410752	77	TFEB	25.52526973310619	0.4949938634740325	77	POU4F2	22.972027972027973	77	POU4F2	26.152097902097903	0.9942758194310991
78	PRRX2	27.613226766964427	78	PRRX2	27.060021940134778	0.6799726362507863	78	SHOX2	14.037202893558387	78	SHOX2	26.491560454702032	0.6470858026690239	78	ELF4	19.808306709265175	78	ELF4	27.048531872813022	0.43114015824784246	78	TBX19	7.464475261085431	78	TBX19	25.899674713234038	0.5981255581257554	78	DLX4	16.14612909331819	78	DLX4	25.773234904410373	0.8783459614477565	78	TBX2	22.937062937062937	78	TBX2	26.05769230769231	0.443673779716541
79	ALX4	27.19009559630152	79	ALX4	27.07726061745808	0.36845084719888427	79	DMRT3	14.019979331725802	79	DMRT3	26.49672752325181	0.5598161030913346	79	TFAP2E	19.747451696333485	79	TFAP2E	27.116993762361176	0.4789892617109023	79	CEBPE	6.4030131826742	79	CEBPE	26.553672316384183	0.5020673959464198	79	BATF3	16.032557259133068	79	BATF3	25.58773424190801	0.8286680589137965	79	ATF3	22.91958041958042	79	ATF3	26.26048951048951	0.646307178398424
80	HOXA5	25.748315311079768	80	HOXA5	27.265318915530486	0.6669444523293034	80	VAX2	13.606613847743713	80	VAX2	26.438167413021013	0.5013210516631456	80	LBX2	19.504031644606727	80	LBX2	27.019625741670467	0.4566154019730187	80	PROX1	6.214689265536723	80	PROX1	26.348228043143298	0.563309149311583	80	DLX3	15.748627673670262	80	DLX3	25.394662123793296	0.432816483602436	80	PLAGL1	21.293706293706293	80	PLAGL1	26.25	0.6166770637922115
81	TBX15	25.513242438489264	81	TBX15	27.070992007522335	0.3780184897194508	81	HLX	13.089906992766103	81	HLX	25.985187736823974	0.4512474590881949	81	CEBPD	19.260611592879965	81	CEBPD	27.165677772706527	0.5677482447437981	81	YY2	5.61547680191748	81	YY2	25.678822119500087	0.6451648950508536	81	DMRTA1	15.616127200454288	81	DMRTA1	26.0155214840053	0.5031743543802404	81	ARNTL	20.83916083916084	81	ARNTL	26.86888111888112	0.5052689519213842
82	LHX9	25.058768218147627	82	LHX9	27.483153110797684	0.6892282461526479	82	ARID5A	12.952118498105408	82	ARID5A	26.279710644161213	0.6551205382866903	82	IRF5	19.06283280085197	82	IRF5	26.835539327552112	0.924076157706155	82	SP100	4.571135079609656	82	SP100	26.290018832391716	0.6985524894158119	82	BHLHE40	15.37005489305319	82	BHLHE40	25.49498391065682	0.5108243166557878	82	HSF4	20.6993006993007	82	HSF4	26.657342657342657	0.6220337700252987
83	NKX3-2	24.933396019432692	83	NKX3-2	27.260617458078674	0.5251831714675492	83	BHLHE41	12.624870823286255	83	BHLHE41	26.315880124009645	0.5943726165313181	83	NFIL3	18.45428267153507	83	NFIL3	27.054617374106193	0.5400368105486173	83	SSPN	0.01712035610340695	83	SSPN	0.01712035610340695	0.0	83	TFEC	15.294340336929773	83	TFEC	25.890592466401664	0.6612464773432357	83	EHF	20.472027972027973	83	EHF	26.25874125874126	0.5816189478673833
84	HOXD11	24.902052969753957	84	HOXD11	27.643002664159223	0.6249952645708652	84	ELK3	11.040303134688253	84	ELK3	26.222872890113678	0.730337920658247	84	ZNF524	17.967442568081545	84	ZNF524	26.811197322379428	0.44796947416832483	84	B2M	0.01712035610340695	84	B2M	0.01712035610340695	0.0	84	HERPUD1	15.086125307590384	84	HERPUD1	25.867878099564642	0.7066342617761592	84	MAFF	20.437062937062937	84	MAFF	26.480769230769234	0.7287526128105973
85	IRX3	24.776680771039022	85	IRX3	27.31390064253252	0.7227088115818731	85	ETV5	10.14467791939373	85	ETV5	26.250430589045816	0.7502220549604189	85	MESP1	17.587098737258483	85	MESP1	26.826411075612356	0.8250302093036772	85	CD226	0.01712035610340695	85	CD226	0.01712035610340695	0.0	85	GRHL1	14.991482112436117	85	GRHL1	25.546091236040134	0.5817100614689625	85	PITX2	20.017482517482517	85	PITX2	26.692307692307697	0.6794741849245449
86	NFATC1	24.604293997805986	86	NFATC1	27.14778247923523	0.9048334567131289	86	ARID5B	9.903548053737513	86	ARID5B	26.069583189803655	0.7021300694635018	86	CREB5	17.267609919367107	86	CREB5	27.14589989350373	0.5915802947871522	86	ZNF703	0.01712035610340695	86	ZNF703	0.01712035610340695	0.0	86	DLX5	14.821124361158432	86	DLX5	26.017414347908385	0.6961134072668081	86	HOXB9	19.912587412587413	86	HOXB9	26.458041958041957	0.7339826294054663
87	FOXF1	24.38489265005485	87	FOXF1	27.193229901269394	0.4114066302643316	87	HOXB4	9.886324491904926	87	HOXB4	26.248708232862555	0.8220891043373566	87	HOXA3	17.130686140270804	87	HOXA3	26.977027232618287	0.44857616606559864	87	NR0B2	0.01712035610340695	87	NR0B2	0.01712035610340695	0.0	87	GLIS3	13.590762824152943	87	GLIS3	25.71266325951164	0.25692795004288843	87	TFAP2E	19.912587412587413	87	TFAP2E	26.3479020979021	0.8568377829882976
88	GATA6	24.22817740166118	88	GATA6	26.804576085253096	0.7301719799037095	88	HOXB7	9.197382018601447	88	HOXB7	26.262487082328626	0.8304472107590425	88	TFEB	16.97854860794158	88	TFEB	27.228054160961513	0.5900916557586356	88	GPR183	0.01712035610340695	88	GPR183	0.01712035610340695	0.0	88	IRX6	12.625402233579406	88	IRX6	25.5631270111679	0.8796116358108356	88	NR2F2	19.72027972027972	88	NR2F2	26.56993006993007	0.589386460502744
89	PITX1	24.055790628428145	89	PITX1	27.13524525936374	0.6863072296233778	89	HOXB6	8.422321736135032	89	HOXB6	26.339993110575268	0.5974391589233172	89	HOXB3	16.704701049748973	89	HOXB3	26.89943709113038	0.7939028579895133	89	CEACAM3	0.01712035610340695	89	CEACAM3	0.01712035610340695	0.0	89	ARID5A	12.625402233579406	89	ARID5A	25.947378383494232	0.7794279414192945	89	SNAI2	19.615384615384617	89	SNAI2	26.37937062937063	0.5460285889154107
90	HOXD8	23.899075380034475	90	HOXD8	27.290393355273466	0.5953199548804753	90	CEBPE	6.596624181880813	90	CEBPE	26.262487082328626	0.34540005677175756	90	ZBTB7B	16.62863228358436	90	ZBTB7B	26.9146508443633	0.44032975461480195	90	PIK3CG	0.01712035610340695	90	PIK3CG	0.01712035610340695	0.0	90	BHLHE41	12.549687677455989	90	BHLHE41	25.939806927881886	0.8651526994008685	90	PHOX2B	19.493006993006993	90	PHOX2B	26.218531468531467	0.7504888621439114
91	PRRX1	23.413258110014105	91	PRRX1	27.50822755054067	0.6974814557287589	91	PROX1	6.04547020323803	91	PROX1	26.46916982431967	0.5760399591232296	91	PAX8	16.233074699528373	91	PAX8	26.788376692530043	0.7976940926679065	91	KCNJ2	0.01712035610340695	91	KCNJ2	0.01712035610340695	0.0	91	NR3C2	12.322544009085746	91	NR3C2	25.86787809956464	0.6994484303543296	91	CEBPD	19.475524475524473	91	CEBPD	26.421328671328673	0.4659705872638533
92	FOXD2	23.33490048581727	92	FOXD2	27.367183826986366	0.7617086570935852	92	OLIG2	5.959352394075094	92	OLIG2	26.481226317602484	0.4812899308489735	92	GCM1	16.03529590750038	92	GCM1	26.9146508443633	0.5890866623547977	92	CEACAM6	0.01712035610340695	92	CEACAM6	0.01712035610340695	0.0	92	HOXA4	10.978610637895136	92	HOXA4	25.364376301343935	0.7362729637999903	92	HOXB5	19.458041958041957	92	HOXB5	26.27097902097902	0.35554902035183217
93	TBX2	23.28788591129917	93	TBX2	27.161886851590662	0.904147842500846	93	SP100	4.495349638305202	93	SP100	26.462280399586632	0.6918299806067201	93	TFEC	15.883158375171154	93	TFEC	27.305644302449416	0.4064550002615922	93	CLEC2B	0.01712035610340695	93	CLEC2B	0.01712035610340695	0.0	93	BARX2	10.48646602309294	93	BARX2	25.924664016657204	0.4955689773826562	93	TCF21	19.423076923076923	93	TCF21	26.56993006993007	0.392621691025446
94	CREB3L1	22.911769315154366	94	CREB3L1	27.343676539727312	0.5309294282879374	94	OLIG1	4.409231829142267	94	OLIG1	26.035136066138477	0.37006216449029805	94	BHLHE40	15.533242050813936	94	BHLHE40	27.37867031796744	0.49158082795281904	94	PPP1R14C	0.01712035610340695	94	PPP1R14C	0.01712035610340695	0.0	94	OSR2	9.331819042210865	94	OSR2	25.648305886806735	0.6485096485271034	94	IRF5	19.16083916083916	94	IRF5	26.159090909090914	0.6849064896786209
95	NFIA	22.69236796740323	95	NFIA	27.42360131640809	0.5784236474224799	95	SSPN	0.01722356183258698	95	SSPN	0.017223561832586977	3.469446951953614E-18	95	HERPUD1	15.122470713525027	95	HERPUD1	26.830975201582238	0.5410708828571565	95	ATP2A3	0.01712035610340695	95	ATP2A3	0.01712035610340695	0.0	95	DMBX1	7.401097861063789	95	DMBX1	25.375733484762442	0.3846008803504464	95	ELF4	19.003496503496503	95	ELF4	26.503496503496507	0.5887742293601084
96	EN2	22.59833881836703	96	EN2	27.047484720263277	0.6824026886243237	96	LGALS3	0.01722356183258698	96	LGALS3	0.017223561832586977	3.469446951953614E-18	96	HOXA2	14.985546934428722	96	HOXA2	27.17632739996957	0.4909141304315301	96	CD99L2	0.01712035610340695	96	CD99L2	0.01712035610340695	0.0	96	CEBPE	6.151807685027447	96	CEBPE	25.455233768692032	0.3334665381097667	96	LBX2	18.636363636363637	96	LBX2	26.674825174825173	0.8636717526228046
97	HOXD10	22.566995768688294	97	HOXD10	27.196364206237263	0.612281481584125	97	B2M	0.01722356183258698	97	B2M	0.017223561832586977	3.469446951953614E-18	97	SHOX2	14.726913129469041	97	SHOX2	26.891830214513924	0.562875974055366	97	PHLDA2	0.01712035610340695	97	PHLDA2	0.01712035610340695	0.0	97	ZBTB7C	5.583948514101836	97	ZBTB7C	25.72780617073632	0.8175243917066128	97	LHX2	18.39160839160839	97	LHX2	26.660839160839156	0.542070820659076
98	ZIC4	22.237893747061587	98	ZIC4	27.274721830434107	0.7665666743695044	98	CD226	0.01722356183258698	98	CD226	0.017223561832586977	3.469446951953614E-18	98	IRX6	13.646736649931537	98	IRX6	27.022668492317052	0.6311342601534363	98	ADRB2	0.01712035610340695	98	ADRB2	0.01712035610340695	0.0	98	SP100	4.52394472837403	98	SP100	25.936021200075714	0.5942989802215539	98	ZNF524	18.094405594405593	98	ZNF524	26.138111888111887	0.7085252602435208
99	PLAGL1	22.018492399310453	99	PLAGL1	27.445541451183203	0.6396228759873875	99	EMILIN2	0.01722356183258698	99	EMILIN2	0.017223561832586977	3.469446951953614E-18	99	ARID5A	13.616309143465694	99	ARID5A	26.738171306861403	0.4059108053608016	99	RPS6KA1	0.01712035610340695	99	RPS6KA1	0.01712035610340695	0.0	99	SSPN	0.01892863903085368	99	SSPN	0.01892863903085368	0.0	99	MESP1	17.902097902097903	99	MESP1	26.302447552447553	0.5537433903745406
100	DLX1	21.861777150916783	100	DLX1	27.542704905187275	0.6073701584721296	100	ZNF703	0.01722356183258698	100	ZNF703	0.017223561832586977	3.469446951953614E-18	100	PTEN	13.312034078807242	100	PTEN	27.250874790810894	0.30410766732595645	100	RPS6KA5	0.01712035610340695	100	RPS6KA5	0.01712035610340695	0.0	100	LGALS3	0.01892863903085368	100	LGALS3	0.01892863903085368	0.0	100	HOXD3	16.905594405594407	100	HOXD3	26.445804195804193	0.3558068140489481
101	IRX5	21.81476257639868	101	IRX5	27.24337878075537	0.5836122982395444	101	GPR183	0.01722356183258698	101	GPR183	0.017223561832586977	3.469446951953614E-18	101	GLIS3	13.296820325574318	101	GLIS3	26.893351589837216	0.5223903095057473	101	SMAD6	0.01712035610340695	101	SMAD6	0.01712035610340695	0.0	101	B2M	0.01892863903085368	101	B2M	0.01892863903085368	0.0	101	HOXB3	16.888111888111887	101	HOXB3	26.39335664335664	0.7430399005464633
102	HSF4	21.611032753486914	102	HSF4	27.210468578592696	0.4201634887843083	102	CEACAM3	0.01722356183258698	102	CEACAM3	0.017223561832586977	3.469446951953614E-18	102	HLX	13.266392819108475	102	HLX	27.159592271413356	0.5197139242910009	102	SMAD7	0.01712035610340695	102	SMAD7	0.01712035610340695	0.0	102	ZNF703	0.01892863903085368	102	ZNF703	0.01892863903085368	0.0	102	CREB5	16.66083916083916	102	CREB5	26.246503496503493	0.6326666799958084
103	ARNTL	21.564018178968812	103	ARNTL	27.295094812725278	0.5619525611524862	103	PIK3CG	0.01722356183258698	103	PIK3CG	0.017223561832586977	3.469446951953614E-18	103	BHLHE41	12.840407728586642	103	BHLHE41	27.194583903849082	0.6057768085767873	103	IL15	0.01712035610340695	103	IL15	0.01712035610340695	0.0	103	NR0B2	0.01892863903085368	103	NR0B2	0.01892863903085368	0.0	103	HOXA3	16.573426573426573	103	HOXA3	26.082167832167833	0.6744922001803008
104	GBX2	21.469989029932613	104	GBX2	27.161886851590662	0.7045845065689997	104	KCNJ2	0.01722356183258698	104	KCNJ2	0.017223561832586977	3.469446951953614E-18	104	HOXA1	12.429636391297732	104	HOXA1	27.19762665449566	0.5365970780283917	104	ILDR2	0.01712035610340695	104	ILDR2	0.01712035610340695	0.0	104	CEACAM3	0.01892863903085368	104	CEACAM3	0.01892863903085368	0.0	104	TFEB	16.46853146853147	104	TFEB	26.197552447552447	0.640024912866625
105	EHF	21.42297445541451	105	EHF	27.295094812725278	0.6961068358358087	105	CEACAM6	0.01722356183258698	105	CEACAM6	0.017223561832586977	3.469446951953614E-18	105	HOXC8	11.98843754754298	105	HOXC8	27.267609919367107	0.41564742309115094	105	EPAS1	0.01712035610340695	105	EPAS1	0.01712035610340695	0.0	105	PIK3CG	0.01892863903085368	105	PIK3CG	0.01892863903085368	0.0	105	ZBTB7B	16.32867132867133	105	ZBTB7B	26.494755244755243	0.9935624000776501
106	MAFF	21.266259207020845	106	MAFF	27.19166274878545	0.6127726532599909	106	POLR3GL	0.01722356183258698	106	POLR3GL	0.017223561832586977	3.469446951953614E-18	106	THRA	11.92758253461129	106	THRA	26.827932450935652	0.5242986939579868	106	MYLK4	0.01712035610340695	106	MYLK4	0.01712035610340695	0.0	106	SPTLC3	0.01892863903085368	106	SPTLC3	0.01892863903085368	0.0	106	DLX4	16.066433566433567	106	DLX4	26.255244755244757	0.663682048727049
107	DMRT2	20.796113461839838	107	DMRT2	27.454944366086824	0.8357625813061216	107	CLEC2B	0.01722356183258698	107	CLEC2B	0.017223561832586977	3.469446951953614E-18	107	BARX2	10.86261980830671	107	BARX2	27.18393427658603	0.6301800308203815	107	AKNAD1	0.01712035610340695	107	AKNAD1	0.01712035610340695	0.0	107	TMEM54	0.01892863903085368	107	TMEM54	0.01892863903085368	0.0	107	PAX8	16.031468531468533	107	PAX8	26.17832167832168	0.6478540734487449
108	NR2F2	20.73342736248237	108	NR2F2	27.381288199341792	0.5866176431616832	108	PPP1R14C	0.01722356183258698	108	PPP1R14C	0.017223561832586977	3.469446951953614E-18	108	HOXB4	10.314924691921497	108	HOXB4	26.992240985851208	0.4877805460951343	108	FGL1	0.01712035610340695	108	FGL1	0.01712035610340695	0.0	108	KCNJ2	0.01892863903085368	108	KCNJ2	0.01892863903085368	0.0	108	BHLHE40	15.576923076923077	108	BHLHE40	26.216783216783217	0.5393122876914141
109	ZBTB16	20.655069738285537	109	ZBTB16	27.058454787650838	0.8438268482387774	109	ATP2A3	0.01722356183258698	109	ATP2A3	0.017223561832586977	3.469446951953614E-18	109	ARID5B	9.934580861098432	109	ARID5B	27.09873725848167	0.5835342099130485	109	IFIH1	0.01712035610340695	109	IFIH1	0.01712035610340695	0.0	109	CEACAM6	0.01892863903085368	109	CEACAM6	0.01892863903085368	0.0	109	TFEC	15.297202797202797	109	TFEC	26.55944055944056	0.533018993466425
110	PITX2	20.655069738285537	110	PITX2	27.113305124588624	0.25992536172845215	110	CD99L2	0.01722356183258698	110	CD99L2	0.017223561832586977	3.469446951953614E-18	110	STAT1	9.447740757644912	110	STAT1	26.96029210406207	0.8088066785004487	110	DAB2	0.01712035610340695	110	DAB2	0.01712035610340695	0.0	110	PARP14	0.01892863903085368	110	PARP14	0.01892863903085368	0.0	110	DLX3	15.297202797202797	110	DLX3	26.339160839160837	0.7076079996217266
111	EMX2	20.122237893747062	111	EMX2	27.38912396176148	0.4651064622379772	111	APOA2	0.01722356183258698	111	APOA2	0.017223561832586977	3.469446951953614E-18	111	OSR2	9.26517571884984	111	OSR2	26.914650844363308	0.4412749059643967	111	SPNS3	0.01712035610340695	111	SPNS3	0.01712035610340695	0.0	111	PPP1R14C	0.01892863903085368	111	PPP1R14C	0.01892863903085368	0.0	111	SOX30	15.13986013986014	111	SOX30	26.167832167832167	0.8412270599571946
112	TCF21	20.02820874471086	112	TCF21	27.495690330669174	0.41434812259424336	112	ADRB2	0.01722356183258698	112	ADRB2	0.017223561832586977	3.469446951953614E-18	112	HOXB7	9.20432070591815	112	HOXB7	27.144378518180435	0.6539012019188097	112	WBP1L	0.01712035610340695	112	WBP1L	0.01712035610340695	0.0	112	CD99L2	0.01892863903085368	112	CD99L2	0.01892863903085368	0.0	112	HERPUD1	14.965034965034965	112	HERPUD1	26.470279720279716	0.9433256045736875
113	ELF4	19.93417959567466	113	ELF4	27.27158752546623	0.5015279721415365	113	PARP15	0.01722356183258698	113	PARP15	0.017223561832586977	3.469446951953614E-18	113	TP63	8.778335615396319	113	TP63	27.38931994523049	0.6784395809286715	113	TNFSF12	0.01712035610340695	113	TNFSF12	0.01712035610340695	0.0	113	ADRB2	0.01892863903085368	113	ADRB2	0.01892863903085368	0.0	113	HOXA2	14.912587412587413	113	HOXA2	26.16783216783217	0.456946322140165
114	SNAI2	19.871493496317193	114	SNAI2	27.34681084469519	0.4806842692413307	114	RPS6KA1	0.01722356183258698	114	RPS6KA1	0.017223561832586977	3.469446951953614E-18	114	HOXB6	8.732694355697552	114	HOXB6	26.786855317206754	0.8092243825949818	114	SLIT3	0.01712035610340695	114	SLIT3	0.01712035610340695	0.0	114	EREG	0.01892863903085368	114	EREG	0.01892863903085368	0.0	114	SHOX2	14.318181818181818	114	SHOX2	26.05594405594406	0.6363828476313235
115	CEBPD	19.63642062372669	115	CEBPD	27.47375019589406	0.8081539604885408	115	RPS6KA5	0.01722356183258698	115	RPS6KA5	0.017223561832586977	3.469446951953614E-18	115	PAX1	8.519701810436635	115	PAX1	26.811197322379428	0.7784641306688589	115	CD48	0.01712035610340695	115	CD48	0.01712035610340695	0.0	115	PRSS57	0.01892863903085368	115	PRSS57	0.01892863903085368	0.0	115	HOXA7	14.265734265734265	115	HOXA7	25.954545454545457	0.7051416901367124
116	LBX2	19.448362325654287	116	LBX2	27.393825419213293	0.3057353439087707	116	SMAD6	0.01722356183258698	116	SMAD6	0.017223561832586977	3.469446951953614E-18	116	HOMEZ	8.474060550737866	116	HOMEZ	26.923779096303054	0.4581361038233612	116	CFH	0.01712035610340695	116	CFH	0.01712035610340695	0.0	116	GRAPL	0.01892863903085368	116	GRAPL	0.01892863903085368	0.0	116	VAX2	13.653846153846153	116	VAX2	26.50174825174825	0.5543060930165262
117	HOXB5	19.401347751136186	117	HOXB5	27.083529227393825	0.7798941854797328	117	SMAD7	0.01722356183258698	117	SMAD7	0.017223561832586977	3.469446951953614E-18	117	HOXB2	8.276281758709873	117	HOXB2	26.984634109234747	0.7372331145108114	117	CALCOCO1	0.01712035610340695	117	CALCOCO1	0.01712035610340695	0.0	117	CHST7	0.01892863903085368	117	CHST7	0.01892863903085368	0.0	117	IRX6	13.479020979020978	117	IRX6	26.18706293706294	0.650972049719769
118	IRF5	19.38567622629682	118	IRF5	27.35934806456668	0.651520910251811	118	IL15	0.01722356183258698	118	IL15	0.017223561832586977	3.469446951953614E-18	118	TBX19	7.819869161722197	118	TBX19	27.08808763121862	0.37968907585968853	118	SFMBT2	0.01712035610340695	118	SFMBT2	0.01712035610340695	0.0	118	RPS6KA5	0.01892863903085368	118	RPS6KA5	0.01892863903085368	0.0	118	HOXC9	13.1993006993007	118	HOXC9	26.24825174825175	0.717516254880951
119	DMRTA2	19.291647077260617	119	DMRTA2	27.39695972418117	0.8317372991228399	119	ILDR2	0.01722356183258698	119	ILDR2	0.017223561832586977	3.469446951953614E-18	119	CEBPE	6.4354176175262445	119	CEBPE	26.862924083371365	0.681978443463766	119	CHI3L2	0.01712035610340695	119	CHI3L2	0.01712035610340695	0.0	119	SMAD6	0.01892863903085368	119	SMAD6	0.01892863903085368	0.0	119	HLX	13.1993006993007	119	HLX	26.741258741258747	0.5026459404631954
120	ZNF524	18.915530481115812	120	ZNF524	27.022410280520297	0.49409064615013476	120	EPAS1	0.01722356183258698	120	EPAS1	0.017223561832586977	3.469446951953614E-18	120	OLIG2	6.359348851361631	120	OLIG2	27.05918150007607	0.4933198777038862	120	CYP4F3	0.01712035610340695	120	CYP4F3	0.01712035610340695	0.0	120	SMAD7	0.01892863903085368	120	SMAD7	0.01892863903085368	0.0	120	ARID5A	13.041958041958043	120	ARID5A	26.744755244755243	0.6126269265922583
121	FOXF2	18.61777150916784	121	FOXF2	26.84218774486758	0.762989234513242	121	MYLK4	0.01722356183258698	121	MYLK4	0.017223561832586977	3.469446951953614E-18	121	ZBTB7C	5.963791267305645	121	ZBTB7C	27.008976114407425	0.7625733511785531	121	SDF2L1	0.01712035610340695	121	SDF2L1	0.01712035610340695	0.0	121	IL15	0.01892863903085368	121	IL15	0.01892863903085368	0.0	121	HOXB8	12.989510489510488	121	HOXB8	26.216783216783217	0.5872772904460353
122	GSX2	18.586428459489106	122	GSX2	27.385989656793605	0.6261259599113933	122	FGL1	0.01722356183258698	122	FGL1	0.017223561832586977	3.469446951953614E-18	122	NEUROD2	4.822759774836452	122	NEUROD2	27.07439525330899	0.46764414707927	122	ASB8	0.01712035610340695	122	ASB8	0.01712035610340695	0.0	122	SZT2	0.01892863903085368	122	SZT2	0.01892863903085368	0.0	122	GLIS3	12.937062937062937	122	GLIS3	26.4493006993007	0.502478696398654
123	LHX2	18.28866948754114	123	LHX2	27.26218461056261	0.6245137058892869	123	IFIH1	0.01722356183258698	123	IFIH1	0.017223561832586977	3.469446951953614E-18	123	SP100	4.655408489274304	123	SP100	26.80967594705614	0.37171405578154115	123	VASH1	0.01712035610340695	123	VASH1	0.01712035610340695	0.0	123	ILDR2	0.01892863903085368	123	ILDR2	0.01892863903085368	0.0	123	BHLHE41	12.447552447552447	123	BHLHE41	26.37237762237762	0.44042413839753636
124	MESP1	18.2103118633443	124	MESP1	27.29352766024134	0.4907564965002319	124	DAB2	0.01722356183258698	124	DAB2	0.017223561832586977	3.469446951953614E-18	124	SSPN	0.015213753232922561	124	SSPN	0.015213753232922563	1.734723475976807E-18	124	CLEC1A	0.01712035610340695	124	CLEC1A	0.01712035610340695	0.0	124	EPAS1	0.01892863903085368	124	EPAS1	0.01892863903085368	0.0	124	HOXA1	12.43006993006993	124	HOXA1	26.44055944055944	0.5536854326382539
125	ID4	18.084939664629367	125	ID4	27.31390064253252	0.7850620609689654	125	PGLYRP2	0.01722356183258698	125	PGLYRP2	0.017223561832586977	3.469446951953614E-18	125	FHIT	0.015213753232922561	125	FHIT	0.015213753232922563	1.734723475976807E-18	125	CARD9	0.01712035610340695	125	CARD9	0.01712035610340695	0.0	125	MYLK4	0.01892863903085368	125	MYLK4	0.01892863903085368	0.0	125	HOXC6	11.940559440559442	125	HOXC6	26.396853146853147	0.7453972248655772
126	HOXD3	17.661808493966465	126	HOXD3	27.324870709920077	0.6623773488703278	126	SPNS3	0.01722356183258698	126	SPNS3	0.017223561832586977	3.469446951953614E-18	126	LGALS3	0.015213753232922561	126	LGALS3	0.015213753232922563	1.734723475976807E-18	126	CD300C	0.01712035610340695	126	CD300C	0.01712035610340695	0.0	126	TCEA3	0.01892863903085368	126	TCEA3	0.01892863903085368	0.0	126	HOXC8	11.748251748251748	126	HOXC8	26.655594405594407	0.5702115440333511
127	DLX2	17.48942172073343	127	DLX2	27.273154677950163	0.6553639819382991	127	WBP1L	0.01722356183258698	127	WBP1L	0.017223561832586977	3.469446951953614E-18	127	B2M	0.015213753232922561	127	B2M	0.015213753232922563	1.734723475976807E-18	127	IL10RB	0.01712035610340695	127	IL10RB	0.01712035610340695	0.0	127	RAB11FIP1	0.01892863903085368	127	RAB11FIP1	0.01892863903085368	0.0	127	HOXC5	11.066433566433567	127	HOXC5	26.2465034965035	0.758025910727365
128	CREB5	17.37972104685786	128	CREB5	27.213602883560572	0.7008606576319765	128	TNFSF12	0.01722356183258698	128	TNFSF12	0.017223561832586977	3.469446951953614E-18	128	CD226	0.015213753232922561	128	CD226	0.015213753232922563	1.734723475976807E-18	128	BCDIN3D	0.01712035610340695	128	BCDIN3D	0.01712035610340695	0.0	128	FGL1	0.01892863903085368	128	FGL1	0.01892863903085368	0.0	128	HOXC4	11.066433566433567	128	HOXC4	26.534965034965033	1.199657432316502
129	TFEB	17.348377997179128	129	TFEB	27.375019589406048	0.726246259387882	129	SLIT3	0.01722356183258698	129	SLIT3	0.017223561832586977	3.469446951953614E-18	129	EMILIN2	0.015213753232922561	129	EMILIN2	0.015213753232922563	1.734723475976807E-18	129	MYCL	0.01712035610340695	129	MYCL	0.01712035610340695	0.0	129	IFIH1	0.01892863903085368	129	IFIH1	0.01892863903085368	0.0	129	HOXA4	10.944055944055945	129	HOXA4	26.480769230769234	0.6589796051516826
130	BATF3	17.301363422661026	130	BATF3	27.459645823538636	0.42410516675421167	130	CD48	0.01722356183258698	130	CD48	0.017223561832586977	3.469446951953614E-18	130	ZNF703	0.015213753232922561	130	ZNF703	0.015213753232922563	1.734723475976807E-18	130	EAF2	0.01712035610340695	130	EAF2	0.01712035610340695	0.0	130	KRT12	0.01892863903085368	130	KRT12	0.01892863903085368	0.0	130	OSR1	10.367132867132867	130	OSR1	26.321678321678327	0.7149558832599875
131	HOXB3	17.144648174267356	131	HOXB3	27.44710860366714	0.7489021477854859	131	CFH	0.01722356183258698	131	CFH	0.017223561832586977	3.469446951953614E-18	131	GPR183	0.015213753232922561	131	GPR183	0.015213753232922563	1.734723475976807E-18	131	CKLF	0.01712035610340695	131	CKLF	0.01712035610340695	0.0	131	DAB2	0.01892863903085368	131	DAB2	0.01892863903085368	0.0	131	HOXB4	10.227272727272728	131	HOXB4	26.218531468531467	0.6156750943481293
132	ARX	17.050619025231157	132	ARX	27.318602099984332	0.35844994734852964	132	CALCOCO1	0.01722356183258698	132	CALCOCO1	0.017223561832586977	3.469446951953614E-18	132	CEACAM3	0.015213753232922561	132	CEACAM3	0.015213753232922563	1.734723475976807E-18	132	RGS18	0.01712035610340695	132	RGS18	0.01712035610340695	0.0	132	WBP1L	0.01892863903085368	132	WBP1L	0.01892863903085368	0.0	132	HOXB7	9.685314685314687	132	HOXB7	26.089160839160844	0.4437977609658149
133	HOXA3	16.83121767748002	133	HOXA3	27.26375176304655	0.45883323693130795	133	SFMBT2	0.01722356183258698	133	SFMBT2	0.017223561832586977	3.469446951953614E-18	133	PIK3CG	0.015213753232922561	133	PIK3CG	0.015213753232922563	1.734723475976807E-18	133	TMC8	0.01712035610340695	133	TMC8	0.01712035610340695	0.0	133	TNFSF12	0.01892863903085368	133	TNFSF12	0.01892863903085368	0.0	133	ARID5B	9.423076923076923	133	ARID5B	26.566433566433567	0.6465317666951742
134	PAX8	16.81554615264065	134	PAX8	27.16502115655853	0.5081152086161351	134	CHI3L2	0.01722356183258698	134	CHI3L2	0.017223561832586977	3.469446951953614E-18	134	KCNJ2	0.015213753232922561	134	KCNJ2	0.015213753232922563	1.734723475976807E-18	134	CD300LF	0.01712035610340695	134	CD300LF	0.01712035610340695	0.0	134	SLIT3	0.01892863903085368	134	SLIT3	0.01892863903085368	0.0	134	HOXB6	8.6013986013986	134	HOXB6	26.164335664335663	0.6289917274360929
135	LMX1A	16.42375803165648	135	LMX1A	27.285691897821657	0.5052189473605159	135	CYP4F3	0.01722356183258698	135	CYP4F3	0.017223561832586977	3.469446951953614E-18	135	CEACAM6	0.015213753232922561	135	CEACAM6	0.015213753232922563	1.734723475976807E-18	135	TXNIP	0.01712035610340695	135	TXNIP	0.01712035610340695	0.0	135	CA12	0.01892863903085368	135	CA12	0.01892863903085368	0.0	135	TP63	8.391608391608392	135	TP63	26.403846153846153	0.29679630778586347
136	BHLHE40	16.298385832941545	136	BHLHE40	27.59598808964113	0.6822227149186056	136	ASB8	0.01722356183258698	136	ASB8	0.017223561832586977	3.469446951953614E-18	136	CRB1	0.015213753232922561	136	CRB1	0.015213753232922563	1.734723475976807E-18	136	ADAP1	0.01712035610340695	136	ADAP1	0.01712035610340695	0.0	136	RAB20	0.01892863903085368	136	RAB20	0.01892863903085368	0.0	136	HOXB2	8.286713286713287	136	HOXB2	26.638111888111887	0.8237976685206642
137	TFEC	16.12599905970851	137	TFEC	27.202632816173015	0.5219723602795326	137	VASH1	0.01722356183258698	137	VASH1	0.017223561832586977	3.469446951953614E-18	137	PARP14	0.015213753232922561	137	PARP14	0.015213753232922563	1.734723475976807E-18	137	ALCAM	0.01712035610340695	137	ALCAM	0.01712035610340695	0.0	137	NIPAL4	0.01892863903085368	137	NIPAL4	0.01892863903085368	0.0	137	CEBPE	6.328671328671328	137	CEBPE	26.445804195804197	0.5726185036362652
138	DLX3	16.06331296035104	138	DLX3	27.68531578122552	0.7176189553781136	138	CLEC1A	0.01722356183258698	138	CLEC1A	0.017223561832586977	3.469446951953614E-18	138	CLEC2B	0.015213753232922561	138	CLEC2B	0.015213753232922563	1.734723475976807E-18	138	TRADD	0.01712035610340695	138	TRADD	0.01712035610340695	0.0	138	CALCOCO1	0.01892863903085368	138	CALCOCO1	0.01892863903085368	0.0	138	OLIG2	6.206293706293707	138	OLIG2	26.56118881118881	0.44476087980772916
139	HLF	16.047641435511675	139	HLF	27.213602883560572	0.8604580546968956	139	CLEC1B	0.01722356183258698	139	CLEC1B	0.017223561832586977	3.469446951953614E-18	139	MAG	0.015213753232922561	139	MAG	0.015213753232922563	1.734723475976807E-18	139	SIPA1	0.01712035610340695	139	SIPA1	0.01712035610340695	0.0	139	SFMBT2	0.01892863903085368	139	SFMBT2	0.01892863903085368	0.0	139	ZBTB7C	6.013986013986014	139	ZBTB7C	26.723776223776223	0.7054017077310574
140	HERPUD1	15.765553988403072	140	HERPUD1	27.7103902209685	0.6727010023655894	140	C4orf19	0.01722356183258698	140	C4orf19	0.017223561832586977	3.469446951953614E-18	140	ATP2A3	0.015213753232922561	140	ATP2A3	0.015213753232922563	1.734723475976807E-18	140	CDKN1A	0.01712035610340695	140	CDKN1A	0.01712035610340695	0.0	140	CHI3L2	0.01892863903085368	140	CHI3L2	0.01892863903085368	0.0	140	GATA2	5.839160839160839	140	GATA2	26.31818181818182	0.5752359310325823
141	HOXA7	14.981977746434726	141	HOXA7	26.9628584861307	0.396786792410613	141	CARD9	0.01722356183258698	141	CARD9	0.017223561832586977	3.469446951953614E-18	141	CD99L2	0.015213753232922561	141	CD99L2	0.015213753232922563	1.734723475976807E-18	141	PHACTR1	0.01712035610340695	141	PHACTR1	0.01712035610340695	0.0	141	ASB8	0.01892863903085368	141	ASB8	0.01892863903085368	0.0	141	NEUROG2	5.332167832167832	141	NEUROG2	26.534965034965033	0.8506210461278285
142	HOXA2	14.887948597398527	142	HOXA2	27.470615890926183	0.621211416727689	142	PDE8A	0.01722356183258698	142	PDE8A	0.017223561832586977	3.469446951953614E-18	142	APOA2	0.015213753232922561	142	APOA2	0.015213753232922563	1.734723475976807E-18	142	CLIC3	0.01712035610340695	142	CLIC3	0.01712035610340695	0.0	142	VASH1	0.01892863903085368	142	VASH1	0.01892863903085368	0.0	142	SP100	4.580419580419581	142	SP100	26.673076923076927	0.595640941716543
143	SHOX2	14.402131327378154	143	SHOX2	27.324870709920077	0.667290509651922	143	CD300C	0.01722356183258698	143	CD300C	0.017223561832586977	3.469446951953614E-18	143	ADRB2	0.015213753232922561	143	ADRB2	0.015213753232922563	1.734723475976807E-18	143	ASGR2	0.01712035610340695	143	ASGR2	0.01712035610340695	0.0	143	CLEC1A	0.01892863903085368	143	CLEC1A	0.01892863903085368	0.0	143	OLIG1	4.125874125874126	143	OLIG1	26.206293706293707	0.9865779768751106
144	MEOX1	14.057357780912083	144	MEOX1	27.6461369691271	0.7862811798339108	144	IL10RB	0.01722356183258698	144	IL10RB	0.017223561832586977	3.469446951953614E-18	144	CYP27B1	0.015213753232922561	144	CYP27B1	0.015213753232922563	1.734723475976807E-18	144	IL21R	0.01712035610340695	144	IL21R	0.01712035610340695	0.0	144	PIP4K2C	0.01892863903085368	144	PIP4K2C	0.01892863903085368	0.0	144	SSPN	0.017482517482517484	144	SSPN	0.01748251748251748	3.469446951953614E-18
145	HEY1	13.77527033380348	145	HEY1	27.028678890456046	0.6082914024646981	145	MSL3	0.01722356183258698	145	MSL3	0.017223561832586977	3.469446951953614E-18	145	EREG	0.015213753232922561	145	EREG	0.015213753232922563	1.734723475976807E-18	145	TMEM52B	0.01712035610340695	145	TMEM52B	0.01712035610340695	0.0	145	PDE8A	0.01892863903085368	145	PDE8A	0.01892863903085368	0.0	145	ELANE	0.017482517482517484	145	ELANE	0.01748251748251748	3.469446951953614E-18
146	VAX2	13.571540510891712	146	VAX2	26.998902993261243	0.530188785633595	146	BCDIN3D	0.01722356183258698	146	BCDIN3D	0.017223561832586977	3.469446951953614E-18	146	PRSS57	0.015213753232922561	146	PRSS57	0.015213753232922563	1.734723475976807E-18	146	LRRC36	0.01712035610340695	146	LRRC36	0.01712035610340695	0.0	146	RAB27B	0.01892863903085368	146	RAB27B	0.01892863903085368	0.0	146	LGALS3	0.017482517482517484	146	LGALS3	0.01748251748251748	3.469446951953614E-18
147	ARID5A	13.367810687979938	147	ARID5A	27.26531891553048	0.6515209102518105	147	SERINC1	0.01722356183258698	147	SERINC1	0.017223561832586977	3.469446951953614E-18	147	DNASE1L1	0.015213753232922561	147	DNASE1L1	0.015213753232922563	1.734723475976807E-18	147	HLA-DPA1	0.01712035610340695	147	HLA-DPA1	0.01712035610340695	0.0	147	RNF103	0.01892863903085368	147	RNF103	0.01892863903085368	0.0	147	B2M	0.017482517482517484	147	B2M	0.01748251748251748	3.469446951953614E-18
148	GLIS3	13.320796113461839	148	GLIS3	27.114872277072557	0.5803883158895928	148	EAF2	0.01722356183258698	148	EAF2	0.017223561832586977	3.469446951953614E-18	148	GRAPL	0.015213753232922561	148	GRAPL	0.015213753232922563	1.734723475976807E-18	148	DENND4A	0.01712035610340695	148	DENND4A	0.01712035610340695	0.0	148	CD300C	0.01892863903085368	148	CD300C	0.01892863903085368	0.0	148	CD226	0.017482517482517484	148	CD226	0.01748251748251748	3.469446951953614E-18
149	HLX	13.273781538943737	149	HLX	27.37188528443817	0.5867181143276119	149	BVES	0.01722356183258698	149	BVES	0.017223561832586977	3.469446951953614E-18	149	PARP15	0.015213753232922561	149	PARP15	0.015213753232922563	1.734723475976807E-18	149	CHPF2	0.01712035610340695	149	CHPF2	0.01712035610340695	0.0	149	IL10RB	0.01892863903085368	149	IL10RB	0.01892863903085368	0.0	149	EMILIN2	0.017482517482517484	149	EMILIN2	0.01748251748251748	3.469446951953614E-18
150	BHLHE41	13.148409340228802	150	BHLHE41	27.362482369534554	0.5547365623077224	150	PTGDR2	0.01722356183258698	150	PTGDR2	0.017223561832586977	3.469446951953614E-18	150	CHST7	0.015213753232922561	150	CHST7	0.015213753232922563	1.734723475976807E-18	150	OGFR	0.01712035610340695	150	OGFR	0.01712035610340695	0.0	150	MSL3	0.01892863903085368	150	MSL3	0.01892863903085368	0.0	150	ZNF703	0.017482517482517484	150	ZNF703	0.01748251748251748	3.469446951953614E-18
151	GSC	13.117066290550069	151	GSC	27.055320482682966	0.507002288406455	151	CKLF	0.01722356183258698	151	CKLF	0.017223561832586977	3.469446951953614E-18	151	RPS6KA1	0.015213753232922561	151	RPS6KA1	0.015213753232922563	1.734723475976807E-18	151	ST3GAL5	0.01712035610340695	151	ST3GAL5	0.01712035610340695	0.0	151	KCNG1	0.01892863903085368	151	KCNG1	0.01892863903085368	0.0	151	GPR183	0.017482517482517484	151	GPR183	0.01748251748251748	3.469446951953614E-18
152	IRX6	12.850650368280833	152	IRX6	26.97069424855038	0.7530163608435176	152	RGS18	0.01722356183258698	152	RGS18	0.017223561832586977	3.469446951953614E-18	152	RPS6KA2	0.015213753232922561	152	RPS6KA2	0.015213753232922563	1.734723475976807E-18	152	FCGR2A	0.01712035610340695	152	FCGR2A	0.01712035610340695	0.0	152	ERI3	0.01892863903085368	152	ERI3	0.01892863903085368	0.0	152	CEACAM3	0.017482517482517484	152	CEACAM3	0.01748251748251748	3.469446951953614E-18
153	DDIT3	12.599905970850964	153	DDIT3	27.06785770255446	0.6001518831481687	153	TMC8	0.01722356183258698	153	TMC8	0.017223561832586977	3.469446951953614E-18	153	KCNH3	0.015213753232922561	153	KCNH3	0.015213753232922563	1.734723475976807E-18	153	CYTH1	0.01712035610340695	153	CYTH1	0.01712035610340695	0.0	153	MED8	0.01892863903085368	153	MED8	0.01892863903085368	0.0	153	PIK3CG	0.017482517482517484	153	PIK3CG	0.01748251748251748	3.469446951953614E-18
154	NR3C2	12.584234446011596	154	NR3C2	27.574047954866007	0.26662325883055166	154	CD300LF	0.01722356183258698	154	CD300LF	0.017223561832586977	3.469446951953614E-18	154	LRPAP1	0.015213753232922561	154	LRPAP1	0.015213753232922563	1.734723475976807E-18	154	NIM1K	0.01712035610340695	154	NIM1K	0.01712035610340695	0.0	154	LCN12	0.01892863903085368	154	LCN12	0.01892863903085368	0.0	154	KCNJ2	0.017482517482517484	154	KCNJ2	0.01748251748251748	3.469446951953614E-18
155	HOXC6	12.427519197617928	155	HOXC6	27.122708039492245	0.8408485056273397	155	TXNIP	0.01722356183258698	155	TXNIP	0.017223561832586977	3.469446951953614E-18	155	SMAD7	0.015213753232922561	155	SMAD7	0.015213753232922563	1.734723475976807E-18	155	IL6R	0.01712035610340695	155	IL6R	0.01712035610340695	0.0	155	IGFBP6	0.01892863903085368	155	IGFBP6	0.01892863903085368	0.0	155	CEACAM6	0.017482517482517484	155	CEACAM6	0.01748251748251748	3.469446951953614E-18
156	HOXA1	12.31781852374236	156	HOXA1	27.182259833881837	0.5227927671139352	156	ADAP1	0.01722356183258698	156	ADAP1	0.017223561832586977	3.469446951953614E-18	156	AFTPH	0.015213753232922561	156	AFTPH	0.015213753232922563	1.734723475976807E-18	156	LACC1	0.01712035610340695	156	LACC1	0.01712035610340695	0.0	156	TRIM8	0.01892863903085368	156	TRIM8	0.01892863903085368	0.0	156	RAB40B	0.017482517482517484	156	RAB40B	0.01748251748251748	3.469446951953614E-18
157	HOXC8	11.81632972888262	157	HOXC8	27.298229117693154	0.5522272675159605	157	ALCAM	0.01722356183258698	157	ALCAM	0.017223561832586977	3.469446951953614E-18	157	NECAP1	0.015213753232922561	157	NECAP1	0.015213753232922563	1.734723475976807E-18	157	AGR2	0.01712035610340695	157	AGR2	0.01712035610340695	0.0	157	BTC	0.01892863903085368	157	BTC	0.01892863903085368	0.0	157	CLEC2B	0.017482517482517484	157	CLEC2B	0.01748251748251748	3.469446951953614E-18
158	ETV5	11.42454160789845	158	ETV5	27.24181162827143	0.7051158747354883	158	TRADD	0.01722356183258698	158	TRADD	0.017223561832586977	3.469446951953614E-18	158	GDAP2	0.015213753232922561	158	GDAP2	0.015213753232922563	1.734723475976807E-18	158	SLC16A6	0.01712035610340695	158	SLC16A6	0.01712035610340695	0.0	158	AMPD2	0.01892863903085368	158	AMPD2	0.01892863903085368	0.0	158	PPP1R14C	0.017482517482517484	158	PPP1R14C	0.01748251748251748	3.469446951953614E-18
159	HOXA4	11.189468735307946	159	HOXA4	27.03494750039179	0.6575488713171521	159	SIPA1	0.01722356183258698	159	SIPA1	0.017223561832586977	3.469446951953614E-18	159	ABCB5	0.015213753232922561	159	ABCB5	0.015213753232922563	1.734723475976807E-18	159	ARHGAP30	0.01712035610340695	159	ARHGAP30	0.01712035610340695	0.0	159	TMC8	0.01892863903085368	159	TMC8	0.01892863903085368	0.0	159	MAG	0.017482517482517484	159	MAG	0.01748251748251748	3.469446951953614E-18
160	OSR1	10.90738128819934	160	OSR1	26.975395706002196	0.49597590814783254	160	CDKN1A	0.01722356183258698	160	CDKN1A	0.017223561832586977	3.469446951953614E-18	160	IL15	0.015213753232922561	160	IL15	0.015213753232922563	1.734723475976807E-18	160	DCAF6	0.01712035610340695	160	DCAF6	0.01712035610340695	0.0	160	CD300LF	0.01892863903085368	160	CD300LF	0.01892863903085368	0.0	160	ATP2A3	0.017482517482517484	160	ATP2A3	0.01748251748251748	3.469446951953614E-18
161	HOXB4	10.358877918821502	161	HOXB4	27.107036514652872	0.523862766625624	161	PHACTR1	0.01722356183258698	161	PHACTR1	0.017223561832586977	3.469446951953614E-18	161	EPAS1	0.015213753232922561	161	EPAS1	0.015213753232922563	1.734723475976807E-18	161	PTCH2	0.01712035610340695	161	PTCH2	0.01712035610340695	0.0	161	TXNIP	0.01892863903085368	161	TXNIP	0.01892863903085368	0.0	161	CD99L2	0.017482517482517484	161	CD99L2	0.01748251748251748	3.469446951953614E-18
162	ARID5B	10.045447422034163	162	ARID5B	27.022410280520297	0.7266942001320003	162	CLIC3	0.01722356183258698	162	CLIC3	0.017223561832586977	3.469446951953614E-18	162	MYLK4	0.015213753232922561	162	MYLK4	0.015213753232922563	1.734723475976807E-18	162	CMKLR1	0.01712035610340695	162	CMKLR1	0.01712035610340695	0.0	162	ADAP1	0.01892863903085368	162	ADAP1	0.01892863903085368	0.0	162	APOA1	0.017482517482517484	162	APOA1	0.01748251748251748	3.469446951953614E-18
163	STAT1	9.669330825889359	163	STAT1	27.62106252938411	0.7170728775196795	163	ASGR2	0.01722356183258698	163	ASGR2	0.017223561832586977	3.469446951953614E-18	163	TCEA3	0.015213753232922561	163	TCEA3	0.015213753232922563	1.734723475976807E-18	163	GSDMA	0.01712035610340695	163	GSDMA	0.01712035610340695	0.0	163	MECOM	0.01892863903085368	163	MECOM	0.01892863903085368	0.0	163	APOA2	0.017482517482517484	163	APOA2	0.01748251748251748	3.469446951953614E-18
164	OSR2	9.606644726531892	164	OSR2	27.282557592853788	0.6980235088398853	164	TMEM144	0.01722356183258698	164	TMEM144	0.017223561832586977	3.469446951953614E-18	164	TMEM212	0.015213753232922561	164	TMEM212	0.015213753232922563	1.734723475976807E-18	164	PTAFR	0.01712035610340695	164	PTAFR	0.01712035610340695	0.0	164	TRADD	0.01892863903085368	164	TRADD	0.01892863903085368	0.0	164	PHLDA2	0.017482517482517484	164	PHLDA2	0.01748251748251748	3.469446951953614E-18
165	PAX3	9.559630152013792	165	PAX3	27.973671838269865	0.5221229039008826	165	IL21R	0.01722356183258698	165	IL21R	0.017223561832586977	3.469446951953614E-18	165	SMCR8	0.015213753232922561	165	SMCR8	0.015213753232922563	1.734723475976807E-18	165	ATP6V0D1	0.01712035610340695	165	ATP6V0D1	0.01712035610340695	0.0	165	CDKN1A	0.01892863903085368	165	CDKN1A	0.01892863903085368	0.0	165	ADRB2	0.017482517482517484	165	ADRB2	0.01748251748251748	3.469446951953614E-18
166	HOXB7	9.528287102335058	166	HOXB7	27.422034163924145	0.6441282679362105	166	TMEM52B	0.01722356183258698	166	TMEM52B	0.017223561832586977	3.469446951953614E-18	166	IFIH1	0.015213753232922561	166	IFIH1	0.015213753232922563	1.734723475976807E-18	166	SLC15A3	0.01712035610340695	166	SLC15A3	0.01712035610340695	0.0	166	TGFBR3	0.01892863903085368	166	TGFBR3	0.01892863903085368	0.0	166	CYP27B1	0.017482517482517484	166	CYP27B1	0.01748251748251748	3.469446951953614E-18
167	HOXD1	9.183513555868986	167	HOXD1	27.481585958313747	0.6280821830110794	167	LRRC36	0.01722356183258698	167	LRRC36	0.017223561832586977	3.469446951953614E-18	167	DAB2	0.015213753232922561	167	DAB2	0.015213753232922563	1.734723475976807E-18	167	GAB2	0.01712035610340695	167	GAB2	0.01712035610340695	0.0	167	CLIC3	0.01892863903085368	167	CLIC3	0.01892863903085368	0.0	167	EREG	0.017482517482517484	167	EREG	0.01748251748251748	3.469446951953614E-18
168	HOXB6	9.10515593167215	168	HOXB6	27.180692681397897	0.7826102806390687	168	HLA-DPA1	0.01722356183258698	168	HLA-DPA1	0.017223561832586977	3.469446951953614E-18	168	PGLYRP2	0.015213753232922561	168	PGLYRP2	0.015213753232922563	1.734723475976807E-18	168	GAB3	0.01712035610340695	168	GAB3	0.01712035610340695	0.0	168	TMEM144	0.01892863903085368	168	TMEM144	0.01892863903085368	0.0	168	PRSS57	0.017482517482517484	168	PRSS57	0.01748251748251748	3.469446951953614E-18
169	TP63	8.46262341325811	169	TP63	27.660241341482525	0.5154478636075502	169	DENND4A	0.01722356183258698	169	DENND4A	0.017223561832586977	3.469446951953614E-18	169	WBP1L	0.015213753232922561	169	WBP1L	0.015213753232922563	1.734723475976807E-18	169	ARHGAP6	0.01712035610340695	169	ARHGAP6	0.01712035610340695	0.0	169	CYP24A1	0.01892863903085368	169	CYP24A1	0.01892863903085368	0.0	169	DNASE1L1	0.017482517482517484	169	DNASE1L1	0.01748251748251748	3.469446951953614E-18
170	HOXB2	8.243222065506973	170	HOXB2	27.290393355273473	0.6220312295533118	170	CHPF2	0.01722356183258698	170	CHPF2	0.017223561832586977	3.469446951953614E-18	170	TNFSF12	0.015213753232922561	170	TNFSF12	0.015213753232922563	1.734723475976807E-18	170	RNF135	0.01712035610340695	170	RNF135	0.01712035610340695	0.0	170	TMEM52B	0.01892863903085368	170	TMEM52B	0.01892863903085368	0.0	170	PARP15	0.017482517482517484	170	PARP15	0.01748251748251748	3.469446951953614E-18
171	GLIS1	8.070835292273939	171	GLIS1	27.262184610562606	0.6133635421355942	171	OGFR	0.01722356183258698	171	OGFR	0.017223561832586977	3.469446951953614E-18	171	CLIP1	0.015213753232922561	171	CLIP1	0.015213753232922563	1.734723475976807E-18	171	TIPARP	0.01712035610340695	171	TIPARP	0.01712035610340695	0.0	171	HLA-DPA1	0.01892863903085368	171	HLA-DPA1	0.01892863903085368	0.0	171	CHST7	0.017482517482517484	171	CHST7	0.01748251748251748	3.469446951953614E-18
172	DBP	7.255916000626861	172	DBP	27.385989656793605	0.5151261443229415	172	ST3GAL1	0.01722356183258698	172	ST3GAL1	0.017223561832586977	3.469446951953614E-18	172	ANGEL1	0.015213753232922561	172	ANGEL1	0.015213753232922563	1.734723475976807E-18	172	CYB561D1	0.01712035610340695	172	CYB561D1	0.01712035610340695	0.0	172	F2RL2	0.01892863903085368	172	F2RL2	0.01892863903085368	0.0	172	RPS6KA1	0.017482517482517484	172	RPS6KA1	0.01748251748251748	3.469446951953614E-18
173	SIX2	7.193229901269394	173	SIX2	27.4110640965366	0.38967932707432845	173	ST3GAL5	0.01722356183258698	173	ST3GAL5	0.017223561832586977	3.469446951953614E-18	173	CD48	0.015213753232922561	173	CD48	0.015213753232922563	1.734723475976807E-18	173	ARRB2	0.01712035610340695	173	ARRB2	0.01712035610340695	0.0	173	OGFR	0.01892863903085368	173	OGFR	0.01892863903085368	0.0	173	APIP	0.017482517482517484	173	APIP	0.01748251748251748	3.469446951953614E-18
174	SIX1	7.193229901269394	174	SIX1	27.51763046544429	0.6553414966405883	174	FCGR2A	0.01722356183258698	174	FCGR2A	0.017223561832586977	3.469446951953614E-18	174	CA12	0.015213753232922561	174	CA12	0.015213753232922563	1.734723475976807E-18	174	HGFAC	0.01712035610340695	174	HGFAC	0.01712035610340695	0.0	174	ST3GAL5	0.01892863903085368	174	ST3GAL5	0.01892863903085368	0.0	174	LRPAP1	0.017482517482517484	174	LRPAP1	0.01748251748251748	3.469446951953614E-18
175	PROX1	6.582040432534085	175	PROX1	26.998902993261247	0.3709089407299689	175	CYTH1	0.01722356183258698	175	CYTH1	0.017223561832586977	3.469446951953614E-18	175	LEPR	0.015213753232922561	175	LEPR	0.015213753232922563	1.734723475976807E-18	175	DENND3	0.01712035610340695	175	DENND3	0.01712035610340695	0.0	175	GALNS	0.01892863903085368	175	GALNS	0.01892863903085368	0.0	175	SMAD7	0.017482517482517484	175	SMAD7	0.01748251748251748	3.469446951953614E-18
176	CEBPE	6.472339758658517	176	CEBPE	27.263751763046542	0.6159148517145216	176	NIM1K	0.01722356183258698	176	NIM1K	0.017223561832586977	3.469446951953614E-18	176	RAB20	0.015213753232922561	176	RAB20	0.015213753232922563	1.734723475976807E-18	176	DEF6	0.01712035610340695	176	DEF6	0.01712035610340695	0.0	176	FCGR2A	0.01892863903085368	176	FCGR2A	0.01892863903085368	0.0	176	IL15	0.017482517482517484	176	IL15	0.01748251748251748	3.469446951953614E-18
177	OLIG2	6.127566212192447	177	OLIG2	27.362482369534554	0.5502914861645336	177	IL6R	0.01722356183258698	177	IL6R	0.017223561832586977	3.469446951953614E-18	177	RBM44	0.015213753232922561	177	RBM44	0.015213753232922563	1.734723475976807E-18	177	C9	0.01712035610340695	177	C9	0.01712035610340695	0.0	177	CYTH1	0.01892863903085368	177	CYTH1	0.01892863903085368	0.0	177	EPAS1	0.017482517482517484	177	EPAS1	0.01748251748251748	3.469446951953614E-18
178	ZBTB7C	5.673091991850807	178	ZBTB7C	27.121140887008313	0.6408561540690426	178	LACC1	0.01722356183258698	178	LACC1	0.017223561832586977	3.469446951953614E-18	178	NIPAL4	0.015213753232922561	178	NIPAL4	0.015213753232922563	1.734723475976807E-18	178	SLC6A12	0.01712035610340695	178	SLC6A12	0.01712035610340695	0.0	178	IL6R	0.01892863903085368	178	IL6R	0.01892863903085368	0.0	178	MYLK4	0.017482517482517484	178	MYLK4	0.01748251748251748	3.469446951953614E-18
179	BHLHE22	5.265632346027268	179	BHLHE22	27.570913649898138	0.539248493612476	179	AGR2	0.01722356183258698	179	AGR2	0.017223561832586977	3.469446951953614E-18	179	CFH	0.015213753232922561	179	CFH	0.015213753232922563	1.734723475976807E-18	179	ARHGAP25	0.01712035610340695	179	ARHGAP25	0.01712035610340695	0.0	179	LACC1	0.01892863903085368	179	LACC1	0.01892863903085368	0.0	179	FGL1	0.017482517482517484	179	FGL1	0.01748251748251748	3.469446951953614E-18
180	SP100	4.826829650524997	180	SP100	27.298229117693147	0.4183710142442499	180	SLC16A6	0.01722356183258698	180	SLC16A6	0.017223561832586977	3.469446951953614E-18	180	CFB	0.015213753232922561	180	CFB	0.015213753232922563	1.734723475976807E-18	180	LGALS1	0.01712035610340695	180	LGALS1	0.01712035610340695	0.0	180	KRT78	0.01892863903085368	180	KRT78	0.01892863903085368	0.0	180	IFIH1	0.017482517482517484	180	IFIH1	0.01748251748251748	3.469446951953614E-18
181	NEUROD2	4.670114402131327	181	NEUROD2	27.378153894373924	0.42757710021087525	181	ARHGAP30	0.01722356183258698	181	ARHGAP30	0.017223561832586977	3.469446951953614E-18	181	CALCOCO1	0.015213753232922561	181	CALCOCO1	0.015213753232922563	1.734723475976807E-18	181	TAPBP	0.01712035610340695	181	TAPBP	0.01712035610340695	0.0	181	AGR2	0.01892863903085368	181	AGR2	0.01892863903085368	0.0	181	DAB2	0.017482517482517484	181	DAB2	0.01748251748251748	3.469446951953614E-18
182	OLIG1	4.482056104058925	182	OLIG1	27.462780128506505	0.5230252556717777	182	PTCH2	0.01722356183258698	182	PTCH2	0.017223561832586977	3.469446951953614E-18	182	SPG11	0.015213753232922561	182	SPG11	0.015213753232922563	1.734723475976807E-18	182	VMO1	0.01712035610340695	182	VMO1	0.01712035610340695	0.0	182	SLC16A6	0.01892863903085368	182	SLC16A6	0.01892863903085368	0.0	182	SPNS3	0.017482517482517484	182	SPNS3	0.01748251748251748	3.469446951953614E-18
183	SSPN	0.01567152483936687	183	SSPN	0.01567152483936687	0.0	183	CMKLR1	0.01722356183258698	183	CMKLR1	0.017223561832586977	3.469446951953614E-18	183	SFMBT2	0.015213753232922561	183	SFMBT2	0.015213753232922563	1.734723475976807E-18	183	PHC2	0.01712035610340695	183	PHC2	0.01712035610340695	0.0	183	GSDMA	0.01892863903085368	183	GSDMA	0.01892863903085368	0.0	183	TNFSF12	0.017482517482517484	183	TNFSF12	0.01748251748251748	3.469446951953614E-18
184	FHIT	0.01567152483936687	184	FHIT	0.01567152483936687	0.0	184	CD34	0.01722356183258698	184	CD34	0.017223561832586977	3.469446951953614E-18	184	CHI3L2	0.015213753232922561	184	CHI3L2	0.015213753232922563	1.734723475976807E-18	184	PLAUR	0.01712035610340695	184	PLAUR	0.01712035610340695	0.0	184	CACNA1C	0.01892863903085368	184	CACNA1C	0.01892863903085368	0.0	184	SLIT3	0.017482517482517484	184	SLIT3	0.01748251748251748	3.469446951953614E-18
185	C3orf80	0.01567152483936687	185	C3orf80	0.01567152483936687	0.0	185	DCN	0.01722356183258698	185	DCN	0.017223561832586977	3.469446951953614E-18	185	IQCJ	0.015213753232922561	185	IQCJ	0.015213753232922563	1.734723475976807E-18	185	TMEM156	0.01712035610340695	185	TMEM156	0.01712035610340695	0.0	185	PTAFR	0.01892863903085368	185	PTAFR	0.01892863903085368	0.0	185	CD48	0.017482517482517484	185	CD48	0.01748251748251748	3.469446951953614E-18
186	LGALS3	0.01567152483936687	186	LGALS3	0.01567152483936687	0.0	186	GSDMA	0.01722356183258698	186	GSDMA	0.017223561832586977	3.469446951953614E-18	186	CYP4F3	0.015213753232922561	186	CYP4F3	0.015213753232922563	1.734723475976807E-18	186	LRRC29	0.01712035610340695	186	LRRC29	0.01712035610340695	0.0	186	ATP6V0D1	0.01892863903085368	186	ATP6V0D1	0.01892863903085368	0.0	186	RAB20	0.017482517482517484	186	RAB20	0.01748251748251748	3.469446951953614E-18
187	B2M	0.01567152483936687	187	B2M	0.01567152483936687	0.0	187	PTAFR	0.01722356183258698	187	PTAFR	0.017223561832586977	3.469446951953614E-18	187	ASB8	0.015213753232922561	187	ASB8	0.015213753232922563	1.734723475976807E-18	187	GCNT3	0.01712035610340695	187	GCNT3	0.01712035610340695	0.0	187	CLCN4	0.01892863903085368	187	CLCN4	0.01892863903085368	0.0	187	NIPAL4	0.017482517482517484	187	NIPAL4	0.01748251748251748	3.469446951953614E-18
188	CD226	0.01567152483936687	188	CD226	0.01567152483936687	0.0	188	ATP6V0D1	0.01722356183258698	188	ATP6V0D1	0.017223561832586977	3.469446951953614E-18	188	CLEC1A	0.015213753232922561	188	CLEC1A	0.015213753232922563	1.734723475976807E-18	188	RGS1	0.01712035610340695	188	RGS1	0.01712035610340695	0.0	188	SLC15A3	0.01892863903085368	188	SLC15A3	0.01892863903085368	0.0	188	CFH	0.017482517482517484	188	CFH	0.01748251748251748	3.469446951953614E-18
189	EMILIN2	0.01567152483936687	189	EMILIN2	0.01567152483936687	0.0	189	SLC15A3	0.01722356183258698	189	SLC15A3	0.017223561832586977	3.469446951953614E-18	189	CLEC1B	0.015213753232922561	189	CLEC1B	0.015213753232922563	1.734723475976807E-18	189	SIRPB2	0.01712035610340695	189	SIRPB2	0.01712035610340695	0.0	189	DUOXA2	0.01892863903085368	189	DUOXA2	0.01892863903085368	0.0	189	CFB	0.017482517482517484	189	CFB	0.01748251748251748	3.469446951953614E-18
190	ZNF703	0.01567152483936687	190	ZNF703	0.01567152483936687	0.0	190	SLC22A15	0.01722356183258698	190	SLC22A15	0.017223561832586977	3.469446951953614E-18	190	SLC47A1	0.015213753232922561	190	SLC47A1	0.015213753232922563	1.734723475976807E-18	190	CYP1B1	0.01712035610340695	190	CYP1B1	0.01712035610340695	0.0	190	RBM47	0.01892863903085368	190	RBM47	0.01892863903085368	0.0	190	CALCOCO1	0.017482517482517484	190	CALCOCO1	0.01748251748251748	3.469446951953614E-18
191	GPR183	0.01567152483936687	191	GPR183	0.01567152483936687	0.0	191	GAB2	0.01722356183258698	191	GAB2	0.017223561832586977	3.469446951953614E-18	191	IL31RA	0.015213753232922561	191	IL31RA	0.015213753232922563	1.734723475976807E-18	191	SIRPB1	0.01712035610340695	191	SIRPB1	0.01712035610340695	0.0	191	NCMAP	0.01892863903085368	191	NCMAP	0.01892863903085368	0.0	191	SFMBT2	0.017482517482517484	191	SFMBT2	0.01748251748251748	3.469446951953614E-18
192	CEACAM3	0.01567152483936687	192	CEACAM3	0.01567152483936687	0.0	192	GAB3	0.01722356183258698	192	GAB3	0.017223561832586977	3.469446951953614E-18	192	CARD9	0.015213753232922561	192	CARD9	0.015213753232922563	1.734723475976807E-18	192	PIGR	0.01712035610340695	192	PIGR	0.01712035610340695	0.0	192	SLC22A15	0.01892863903085368	192	SLC22A15	0.01892863903085368	0.0	192	CHI3L2	0.017482517482517484	192	CHI3L2	0.01748251748251748	3.469446951953614E-18
193	PIK3CG	0.01567152483936687	193	PIK3CG	0.01567152483936687	0.0	193	ARHGAP6	0.01722356183258698	193	ARHGAP6	0.017223561832586977	3.469446951953614E-18	193	PDE8A	0.015213753232922561	193	PDE8A	0.015213753232922563	1.734723475976807E-18	193	IL1RAP	0.01712035610340695	193	IL1RAP	0.01712035610340695	0.0	193	GAB3	0.01892863903085368	193	GAB3	0.01892863903085368	0.0	193	SDF2L1	0.017482517482517484	193	SDF2L1	0.01748251748251748	3.469446951953614E-18
194	SPTLC3	0.01567152483936687	194	SPTLC3	0.01567152483936687	0.0	194	RNF135	0.01722356183258698	194	RNF135	0.017223561832586977	3.469446951953614E-18	194	MANBA	0.015213753232922561	194	MANBA	0.015213753232922563	1.734723475976807E-18	194	KLHL6	0.01712035610340695	194	KLHL6	0.01712035610340695	0.0	194	ZNF580	0.01892863903085368	194	ZNF580	0.01892863903085368	0.0	194	ASB8	0.017482517482517484	194	ASB8	0.01748251748251748	3.469446951953614E-18
195	CRB1	0.01567152483936687	195	CRB1	0.01567152483936687	0.0	195	TIPARP	0.01722356183258698	195	TIPARP	0.017223561832586977	3.469446951953614E-18	195	CD300C	0.015213753232922561	195	CD300C	0.015213753232922563	1.734723475976807E-18	195	OLR1	0.01712035610340695	195	OLR1	0.01712035610340695	0.0	195	TIPARP	0.01892863903085368	195	TIPARP	0.01892863903085368	0.0	195	VASH1	0.017482517482517484	195	VASH1	0.01748251748251748	3.469446951953614E-18
196	POLR3GL	0.01567152483936687	196	POLR3GL	0.01567152483936687	0.0	196	CYB561D1	0.01722356183258698	196	CYB561D1	0.017223561832586977	3.469446951953614E-18	196	IL10RB	0.015213753232922561	196	IL10RB	0.015213753232922563	1.734723475976807E-18	196	PTGS1	0.01712035610340695	196	PTGS1	0.01712035610340695	0.0	196	CYB561D1	0.01892863903085368	196	CYB561D1	0.01892863903085368	0.0	196	CLEC1A	0.017482517482517484	196	CLEC1A	0.01748251748251748	3.469446951953614E-18
197	SCG2	0.01567152483936687	197	SCG2	0.01567152483936687	0.0	197	MS4A10	0.01722356183258698	197	MS4A10	0.017223561832586977	3.469446951953614E-18	197	BCDIN3D	0.015213753232922561	197	BCDIN3D	0.015213753232922563	1.734723475976807E-18	197	CCR2	0.01712035610340695	197	CCR2	0.01712035610340695	0.0	197	NANOS1	0.01892863903085368	197	NANOS1	0.01892863903085368	0.0	197	CLEC1B	0.017482517482517484	197	CLEC1B	0.01748251748251748	3.469446951953614E-18
198	RAB40B	0.01567152483936687	198	RAB40B	0.01567152483936687	0.0	198	GRK5	0.01722356183258698	198	GRK5	0.017223561832586977	3.469446951953614E-18	198	SERINC1	0.015213753232922561	198	SERINC1	0.015213753232922563	1.734723475976807E-18	198	SMAP2	0.01712035610340695	198	SMAP2	0.01712035610340695	0.0	198	GRK4	0.01892863903085368	198	GRK4	0.01892863903085368	0.0	198	CARD9	0.017482517482517484	198	CARD9	0.01748251748251748	3.469446951953614E-18
199	KCNJ6	0.01567152483936687	199	KCNJ6	0.01567152483936687	0.0	199	ARRB2	0.01722356183258698	199	ARRB2	0.017223561832586977	3.469446951953614E-18	199	SERINC3	0.015213753232922561	199	SERINC3	0.015213753232922563	1.734723475976807E-18	199	PPP1R16B	0.01712035610340695	199	PPP1R16B	0.01712035610340695	0.0	199	CHMP3	0.01892863903085368	199	CHMP3	0.01892863903085368	0.0	199	PDE8A	0.017482517482517484	199	PDE8A	0.01748251748251748	3.469446951953614E-18
200	CLEC2B	0.01567152483936687	200	CLEC2B	0.01567152483936687	0.0	200	HGFAC	0.01722356183258698	200	HGFAC	0.017223561832586977	3.469446951953614E-18	200	MED8	0.015213753232922561	200	MED8	0.015213753232922563	1.734723475976807E-18	200	RBP4	0.01712035610340695	200	RBP4	0.01712035610340695	0.0	200	ADAMTS18	0.01892863903085368	200	ADAMTS18	0.01892863903085368	0.0	200	CD300C	0.017482517482517484	200	CD300C	0.01748251748251748	3.469446951953614E-18
201	PPP1R14C	0.01567152483936687	201	PPP1R14C	0.01567152483936687	0.0	201	RASGRF1	0.01722356183258698	201	RASGRF1	0.017223561832586977	3.469446951953614E-18	201	MFSD2A	0.015213753232922561	201	MFSD2A	0.015213753232922563	1.734723475976807E-18	201	ACYP2	0.01712035610340695	201	ACYP2	0.01712035610340695	0.0	201	DEF6	0.01892863903085368	201	DEF6	0.01892863903085368	0.0	201	IL10RB	0.017482517482517484	201	IL10RB	0.01748251748251748	3.469446951953614E-18
202	P4HA1	0.01567152483936687	202	P4HA1	0.01567152483936687	0.0	202	DENND3	0.01722356183258698	202	DENND3	0.017223561832586977	3.469446951953614E-18	202	TNS3	0.015213753232922561	202	TNS3	0.015213753232922563	1.734723475976807E-18	202	CCR6	0.01712035610340695	202	CCR6	0.01712035610340695	0.0	202	C9	0.01892863903085368	202	C9	0.01892863903085368	0.0	202	BCDIN3D	0.017482517482517484	202	BCDIN3D	0.01748251748251748	3.469446951953614E-18
203	KRTAP1-5	0.01567152483936687	203	KRTAP1-5	0.01567152483936687	0.0	203	DEF6	0.01722356183258698	203	DEF6	0.017223561832586977	3.469446951953614E-18	203	IGFBP6	0.015213753232922561	203	IGFBP6	0.015213753232922563	1.734723475976807E-18	203	SLC16A13	0.01712035610340695	203	SLC16A13	0.01712035610340695	0.0	203	SRC	0.01892863903085368	203	SRC	0.01892863903085368	0.0	203	MED8	0.017482517482517484	203	MED8	0.01748251748251748	3.469446951953614E-18
204	CD99L2	0.01567152483936687	204	CD99L2	0.01567152483936687	0.0	204	C9	0.01722356183258698	204	C9	0.017223561832586977	3.469446951953614E-18	204	CKLF	0.015213753232922561	204	CKLF	0.015213753232922563	1.734723475976807E-18	204	RASSF5	0.01712035610340695	204	RASSF5	0.01712035610340695	0.0	204	PRKAA1	0.01892863903085368	204	PRKAA1	0.01892863903085368	0.0	204	TNS3	0.017482517482517484	204	TNS3	0.01748251748251748	3.469446951953614E-18
205	PHLDA2	0.01567152483936687	205	PHLDA2	0.01567152483936687	0.0	205	SLC6A12	0.01722356183258698	205	SLC6A12	0.017223561832586977	3.469446951953614E-18	205	RGS18	0.015213753232922561	205	RGS18	0.015213753232922563	1.734723475976807E-18	205	IL1R2	0.01712035610340695	205	IL1R2	0.01712035610340695	0.0	205	GALC	0.01892863903085368	205	GALC	0.01892863903085368	0.0	205	PODN	0.017482517482517484	205	PODN	0.01748251748251748	3.469446951953614E-18
206	TNFRSF19	0.01567152483936687	206	TNFRSF19	0.01567152483936687	0.0	206	ARHGAP25	0.01722356183258698	206	ARHGAP25	0.017223561832586977	3.469446951953614E-18	206	CALML3	0.015213753232922561	206	CALML3	0.015213753232922563	1.734723475976807E-18	206	LRRK1	0.01712035610340695	206	LRRK1	0.01712035610340695	0.0	206	GALM	0.01892863903085368	206	GALM	0.01892863903085368	0.0	206	IGFBP6	0.017482517482517484	206	IGFBP6	0.01748251748251748	3.469446951953614E-18
207	GAP43	0.01567152483936687	207	GAP43	0.01567152483936687	0.0	207	GALC	0.01722356183258698	207	GALC	0.017223561832586977	3.469446951953614E-18	207	TMC6	0.015213753232922561	207	TMC6	0.015213753232922563	1.734723475976807E-18	207	CAP1	0.01712035610340695	207	CAP1	0.01712035610340695	0.0	207	TAPBP	0.01892863903085368	207	TAPBP	0.01892863903085368	0.0	207	CKLF	0.017482517482517484	207	CKLF	0.01748251748251748	3.469446951953614E-18
208	PAMR1	0.01567152483936687	208	PAMR1	0.01567152483936687	0.0	208	GALM	0.01722356183258698	208	GALM	0.017223561832586977	3.469446951953614E-18	208	EPHX4	0.015213753232922561	208	EPHX4	0.015213753232922563	1.734723475976807E-18	208	IL4R	0.01712035610340695	208	IL4R	0.01712035610340695	0.0	208	VMO1	0.01892863903085368	208	VMO1	0.01892863903085368	0.0	208	RGS18	0.017482517482517484	208	RGS18	0.01748251748251748	3.469446951953614E-18
209	ADRB2	0.01567152483936687	209	ADRB2	0.01567152483936687	0.0	209	LGALS1	0.01722356183258698	209	LGALS1	0.017223561832586977	3.469446951953614E-18	209	TMC8	0.015213753232922561	209	TMC8	0.015213753232922563	1.734723475976807E-18	209	RHOH	0.01712035610340695	209	RHOH	0.01712035610340695	0.0	209	AGPAT2	0.01892863903085368	209	AGPAT2	0.01892863903085368	0.0	209	TRIM8	0.017482517482517484	209	TRIM8	0.01748251748251748	3.469446951953614E-18
210	EREG	0.01567152483936687	210	EREG	0.01567152483936687	0.0	210	TAPBP	0.01722356183258698	210	TAPBP	0.017223561832586977	3.469446951953614E-18	210	CD300LF	0.015213753232922561	210	CD300LF	0.015213753232922563	1.734723475976807E-18	210	EFHC2	0.01712035610340695	210	EFHC2	0.01712035610340695	0.0	210	PHC2	0.01892863903085368	210	PHC2	0.01892863903085368	0.0	210	TMC6	0.017482517482517484	210	TMC6	0.01748251748251748	3.469446951953614E-18
211	MPV17	0.01567152483936687	211	MPV17	0.01567152483936687	0.0	211	VMO1	0.01722356183258698	211	VMO1	0.017223561832586977	3.469446951953614E-18	211	TXNIP	0.015213753232922561	211	TXNIP	0.015213753232922563	1.734723475976807E-18	211	ETHE1	0.01712035610340695	211	ETHE1	0.01712035610340695	0.0	211	PLAUR	0.01892863903085368	211	PLAUR	0.01892863903085368	0.0	211	TMC8	0.017482517482517484	211	TMC8	0.01748251748251748	3.469446951953614E-18
212	GRAPL	0.01567152483936687	212	GRAPL	0.01567152483936687	0.0	212	PHC2	0.01722356183258698	212	PHC2	0.017223561832586977	3.469446951953614E-18	212	ADAP1	0.015213753232922561	212	ADAP1	0.015213753232922563	1.734723475976807E-18	212	CYBA	0.01712035610340695	212	CYBA	0.01712035610340695	0.0	212	CMYA5	0.01892863903085368	212	CMYA5	0.01892863903085368	0.0	212	CD300LF	0.017482517482517484	212	CD300LF	0.01748251748251748	3.469446951953614E-18
213	CHST7	0.01567152483936687	213	CHST7	0.01567152483936687	0.0	213	PLAUR	0.01722356183258698	213	PLAUR	0.017223561832586977	3.469446951953614E-18	213	ALCAM	0.015213753232922561	213	ALCAM	0.015213753232922563	1.734723475976807E-18	213	HPGD	0.01712035610340695	213	HPGD	0.01712035610340695	0.0	213	ALDH1A1	0.01892863903085368	213	ALDH1A1	0.01892863903085368	0.0	213	TXNIP	0.017482517482517484	213	TXNIP	0.01748251748251748	3.469446951953614E-18
214	RPS6KA2	0.01567152483936687	214	RPS6KA2	0.01567152483936687	0.0	214	CMYA5	0.01722356183258698	214	CMYA5	0.017223561832586977	3.469446951953614E-18	214	TRADD	0.015213753232922561	214	TRADD	0.015213753232922563	1.734723475976807E-18	214	DCSTAMP	0.01712035610340695	214	DCSTAMP	0.01712035610340695	0.0	214	LRRC29	0.01892863903085368	214	LRRC29	0.01892863903085368	0.0	214	ADAP1	0.017482517482517484	214	ADAP1	0.01748251748251748	3.469446951953614E-18
215	SLC28A1	0.01567152483936687	215	SLC28A1	0.01567152483936687	0.0	215	TMEM156	0.01722356183258698	215	TMEM156	0.017223561832586977	3.469446951953614E-18	215	CYB5D2	0.015213753232922561	215	CYB5D2	0.015213753232922563	1.734723475976807E-18	215	FCER1G	0.01712035610340695	215	FCER1G	0.01712035610340695	0.0	215	PRICKLE4	0.01892863903085368	215	PRICKLE4	0.01892863903085368	0.0	215	ALCAM	0.017482517482517484	215	ALCAM	0.01748251748251748	3.469446951953614E-18
216	LRPAP1	0.01567152483936687	216	LRPAP1	0.01567152483936687	0.0	216	LRRC29	0.01722356183258698	216	LRRC29	0.017223561832586977	3.469446951953614E-18	216	MYT1L	0.015213753232922561	216	MYT1L	0.015213753232922563	1.734723475976807E-18	216	APAF1	0.01712035610340695	216	APAF1	0.01712035610340695	0.0	216	GCNT3	0.01892863903085368	216	GCNT3	0.01892863903085368	0.0	216	TRADD	0.017482517482517484	216	TRADD	0.01748251748251748	3.469446951953614E-18
217	ABCB5	0.01567152483936687	217	ABCB5	0.01567152483936687	0.0	217	RAB3IL1	0.01722356183258698	217	RAB3IL1	0.017223561832586977	3.469446951953614E-18	217	CDKN1A	0.015213753232922561	217	CDKN1A	0.015213753232922563	1.734723475976807E-18	217	RGL1	0.01712035610340695	217	RGL1	0.01712035610340695	0.0	217	SLC16A11	0.01892863903085368	217	SLC16A11	0.01892863903085368	0.0	217	CYB5D2	0.017482517482517484	217	CYB5D2	0.01748251748251748	3.469446951953614E-18
218	IL15	0.01567152483936687	218	IL15	0.01567152483936687	0.0	218	PRICKLE4	0.01722356183258698	218	PRICKLE4	0.017223561832586977	3.469446951953614E-18	218	CLIC3	0.015213753232922561	218	CLIC3	0.015213753232922563	1.734723475976807E-18	218	ZFP36L2	0.01712035610340695	218	ZFP36L2	0.01712035610340695	0.0	218	RGS1	0.01892863903085368	218	RGS1	0.01892863903085368	0.0	218	SIPA1	0.017482517482517484	218	SIPA1	0.01748251748251748	3.469446951953614E-18
219	ILDR2	0.01567152483936687	219	ILDR2	0.01567152483936687	0.0	219	RGS1	0.01722356183258698	219	RGS1	0.017223561832586977	3.469446951953614E-18	219	TMEM144	0.015213753232922561	219	TMEM144	0.015213753232922563	1.734723475976807E-18	219	TACC1	0.01712035610340695	219	TACC1	0.01712035610340695	0.0	219	SIRPB2	0.01892863903085368	219	SIRPB2	0.01892863903085368	0.0	219	CDKN1A	0.017482517482517484	219	CDKN1A	0.01748251748251748	3.469446951953614E-18
220	EPAS1	0.01567152483936687	220	EPAS1	0.01567152483936687	0.0	220	SIRPB2	0.01722356183258698	220	SIRPB2	0.017223561832586977	3.469446951953614E-18	220	IL21R	0.015213753232922561	220	IL21R	0.015213753232922563	1.734723475976807E-18	220	MEIG1	0.01712035610340695	220	MEIG1	0.01712035610340695	0.0	220	CYP1B1	0.01892863903085368	220	CYP1B1	0.01892863903085368	0.0	220	CLIC3	0.017482517482517484	220	CLIC3	0.01748251748251748	3.469446951953614E-18
221	MYLK4	0.01567152483936687	221	MYLK4	0.01567152483936687	0.0	221	CYP1B1	0.01722356183258698	221	CYP1B1	0.017223561832586977	3.469446951953614E-18	221	CYP24A1	0.015213753232922561	221	CYP24A1	0.015213753232922563	1.734723475976807E-18	221	TMEM238	0.01712035610340695	221	TMEM238	0.01712035610340695	0.0	221	SIRPB1	0.01892863903085368	221	SIRPB1	0.01892863903085368	0.0	221	ASGR2	0.017482517482517484	221	ASGR2	0.01748251748251748	3.469446951953614E-18
222	MEDAG	0.01567152483936687	222	MEDAG	0.01567152483936687	0.0	222	SIRPB1	0.01722356183258698	222	SIRPB1	0.017223561832586977	3.469446951953614E-18	222	LRRC32	0.015213753232922561	222	LRRC32	0.015213753232922563	1.734723475976807E-18	222	KIAA0513	0.01712035610340695	222	KIAA0513	0.01712035610340695	0.0	222	SERTAD2	0.01892863903085368	222	SERTAD2	0.01892863903085368	0.0	222	IL21R	0.017482517482517484	222	IL21R	0.01748251748251748	3.469446951953614E-18
223	TCEA3	0.01567152483936687	223	TCEA3	0.01567152483936687	0.0	223	PIGR	0.01722356183258698	223	PIGR	0.017223561832586977	3.469446951953614E-18	223	TMEM52B	0.015213753232922561	223	TMEM52B	0.015213753232922563	1.734723475976807E-18	223	HIVEP3	0.01712035610340695	223	HIVEP3	0.01712035610340695	0.0	223	IL1RAP	0.01892863903085368	223	IL1RAP	0.01892863903085368	0.0	223	CYP24A1	0.017482517482517484	223	CYP24A1	0.01748251748251748	3.469446951953614E-18
224	FGL1	0.01567152483936687	224	FGL1	0.01567152483936687	0.0	224	IL1RAP	0.01722356183258698	224	IL1RAP	0.017223561832586977	3.469446951953614E-18	224	HLA-DPA1	0.015213753232922561	224	HLA-DPA1	0.015213753232922563	1.734723475976807E-18	224	P2RX1	0.01712035610340695	224	P2RX1	0.01712035610340695	0.0	224	KLHL6	0.01892863903085368	224	KLHL6	0.01892863903085368	0.0	224	LRRC32	0.017482517482517484	224	LRRC32	0.01748251748251748	3.469446951953614E-18
225	IFIH1	0.01567152483936687	225	IFIH1	0.01567152483936687	0.0	225	KLHL6	0.01722356183258698	225	KLHL6	0.017223561832586977	3.469446951953614E-18	225	DENND4A	0.015213753232922561	225	DENND4A	0.015213753232922563	1.734723475976807E-18	225	KCNK6	0.01712035610340695	225	KCNK6	0.01712035610340695	0.0	225	OLR1	0.01892863903085368	225	OLR1	0.01892863903085368	0.0	225	TMEM52B	0.017482517482517484	225	TMEM52B	0.01748251748251748	3.469446951953614E-18
226	DAB2	0.01567152483936687	226	DAB2	0.01567152483936687	0.0	226	OLR1	0.01722356183258698	226	OLR1	0.017223561832586977	3.469446951953614E-18	226	CHPF2	0.015213753232922561	226	CHPF2	0.015213753232922563	1.734723475976807E-18	226	TNFSF8	0.01712035610340695	226	TNFSF8	0.01712035610340695	0.0	226	SRRM5	0.01892863903085368	226	SRRM5	0.01892863903085368	0.0	226	HLA-DPA1	0.017482517482517484	226	HLA-DPA1	0.01748251748251748	3.469446951953614E-18
227	SPNS3	0.01567152483936687	227	SPNS3	0.01567152483936687	0.0	227	PTGS1	0.01722356183258698	227	PTGS1	0.017223561832586977	3.469446951953614E-18	227	TOR1B	0.015213753232922561	227	TOR1B	0.015213753232922563	1.734723475976807E-18	227	EVI2B	0.01712035610340695	227	EVI2B	0.01712035610340695	0.0	227	PTGS1	0.01892863903085368	227	PTGS1	0.01892863903085368	0.0	227	DENND4A	0.017482517482517484	227	DENND4A	0.01748251748251748	3.469446951953614E-18
228	BBOX1	0.01567152483936687	228	BBOX1	0.01567152483936687	0.0	228	CCR2	0.01722356183258698	228	CCR2	0.017223561832586977	3.469446951953614E-18	228	ARSG	0.015213753232922561	228	ARSG	0.015213753232922563	1.734723475976807E-18	228	IL6ST	0.01712035610340695	228	IL6ST	0.01712035610340695	0.0	228	XCR1	0.01892863903085368	228	XCR1	0.01892863903085368	0.0	228	CHPF2	0.017482517482517484	228	CHPF2	0.01748251748251748	3.469446951953614E-18
229	TNFSF12	0.01567152483936687	229	TNFSF12	0.01567152483936687	0.0	229	SMAP2	0.01722356183258698	229	SMAP2	0.017223561832586977	3.469446951953614E-18	229	OGFR	0.015213753232922561	229	OGFR	0.015213753232922563	1.734723475976807E-18	229	COMMD9	0.01712035610340695	229	COMMD9	0.01712035610340695	0.0	229	CCR2	0.01892863903085368	229	CCR2	0.01892863903085368	0.0	229	MMRN2	0.017482517482517484	229	MMRN2	0.01748251748251748	3.469446951953614E-18
230	SLIT3	0.01567152483936687	230	SLIT3	0.01567152483936687	0.0	230	ARHGAP24	0.01722356183258698	230	ARHGAP24	0.017223561832586977	3.469446951953614E-18	230	ST3GAL1	0.015213753232922561	230	ST3GAL1	0.015213753232922563	1.734723475976807E-18	230	PTGER4	0.01712035610340695	230	PTGER4	0.01712035610340695	0.0	230	FBP1	0.01892863903085368	230	FBP1	0.01892863903085368	0.0	230	OGFR	0.017482517482517484	230	OGFR	0.01748251748251748	3.469446951953614E-18
231	CD48	0.01567152483936687	231	CD48	0.01567152483936687	0.0	231	PPP1R16B	0.01722356183258698	231	PPP1R16B	0.017223561832586977	3.469446951953614E-18	231	ST3GAL5	0.015213753232922561	231	ST3GAL5	0.015213753232922563	1.734723475976807E-18	231	B3GALT4	0.01712035610340695	231	B3GALT4	0.01712035610340695	0.0	231	FBP2	0.01892863903085368	231	FBP2	0.01892863903085368	0.0	231	ST3GAL1	0.017482517482517484	231	ST3GAL1	0.01748251748251748	3.469446951953614E-18
232	CA12	0.01567152483936687	232	CA12	0.01567152483936687	0.0	232	RBP4	0.01722356183258698	232	RBP4	0.017223561832586977	3.469446951953614E-18	232	GALNS	0.015213753232922561	232	GALNS	0.015213753232922563	1.734723475976807E-18	232	GRAMD4	0.01712035610340695	232	GRAMD4	0.01712035610340695	0.0	232	SMAP2	0.01892863903085368	232	SMAP2	0.01892863903085368	0.0	232	ST3GAL5	0.017482517482517484	232	ST3GAL5	0.01748251748251748	3.469446951953614E-18
233	RAB20	0.01567152483936687	233	RAB20	0.01567152483936687	0.0	233	SOCS6	0.01722356183258698	233	SOCS6	0.017223561832586977	3.469446951953614E-18	233	FCGR2A	0.015213753232922561	233	FCGR2A	0.015213753232922563	1.734723475976807E-18	233	APBA1	0.01712035610340695	233	APBA1	0.01712035610340695	0.0	233	SESN2	0.01892863903085368	233	SESN2	0.01892863903085368	0.0	233	GALNS	0.017482517482517484	233	GALNS	0.01748251748251748	3.469446951953614E-18
234	PCDH19	0.01567152483936687	234	PCDH19	0.01567152483936687	0.0	234	GRB2	0.01722356183258698	234	GRB2	0.017223561832586977	3.469446951953614E-18	234	CYTH1	0.015213753232922561	234	CYTH1	0.015213753232922563	1.734723475976807E-18	234	CXCL16	0.01712035610340695	234	CXCL16	0.01712035610340695	0.0	234	PTP4A3	0.01892863903085368	234	PTP4A3	0.01892863903085368	0.0	234	FCGR2A	0.017482517482517484	234	FCGR2A	0.01748251748251748	3.469446951953614E-18
235	NIPAL4	0.01567152483936687	235	NIPAL4	0.01567152483936687	0.0	235	CCR6	0.01722356183258698	235	CCR6	0.017223561832586977	3.469446951953614E-18	235	NIM1K	0.015213753232922561	235	NIM1K	0.015213753232922563	1.734723475976807E-18	235	AKAP6	0.01712035610340695	235	AKAP6	0.01712035610340695	0.0	235	HHAT	0.01892863903085368	235	HHAT	0.01892863903085368	0.0	235	CYTH1	0.017482517482517484	235	CYTH1	0.01748251748251748	3.469446951953614E-18
236	CFH	0.01567152483936687	236	CFH	0.01567152483936687	0.0	236	SLC16A13	0.01722356183258698	236	SLC16A13	0.017223561832586977	3.469446951953614E-18	236	IL6R	0.015213753232922561	236	IL6R	0.015213753232922563	1.734723475976807E-18	236	DBNL	0.01712035610340695	236	DBNL	0.01712035610340695	0.0	236	CD22	0.01892863903085368	236	CD22	0.01892863903085368	0.0	236	NIM1K	0.017482517482517484	236	NIM1K	0.01748251748251748	3.469446951953614E-18
237	CFB	0.01567152483936687	237	CFB	0.01567152483936687	0.0	237	RASSF5	0.01722356183258698	237	RASSF5	0.017223561832586977	3.469446951953614E-18	237	LACC1	0.015213753232922561	237	LACC1	0.015213753232922563	1.734723475976807E-18	237	CAGE1	0.01712035610340695	237	CAGE1	0.01712035610340695	0.0	237	RBP4	0.01892863903085368	237	RBP4	0.01892863903085368	0.0	237	IL6R	0.017482517482517484	237	IL6R	0.01748251748251748	3.469446951953614E-18
238	CALCOCO1	0.01567152483936687	238	CALCOCO1	0.01567152483936687	0.0	238	NEK10	0.01722356183258698	238	NEK10	0.017223561832586977	3.469446951953614E-18	238	KRT78	0.015213753232922561	238	KRT78	0.015213753232922563	1.734723475976807E-18	238	FAM20C	0.01712035610340695	238	FAM20C	0.01712035610340695	0.0	238	CD177	0.01892863903085368	238	CD177	0.01892863903085368	0.0	238	LACC1	0.017482517482517484	238	LACC1	0.01748251748251748	3.469446951953614E-18
239	NQO1	0.01567152483936687	239	NQO1	0.01567152483936687	0.0	239	IL1R2	0.01722356183258698	239	IL1R2	0.017223561832586977	3.469446951953614E-18	239	SLC16A6	0.015213753232922561	239	SLC16A6	0.015213753232922563	1.734723475976807E-18	239	CD1C	0.01712035610340695	239	CD1C	0.01712035610340695	0.0	239	GPR1	0.01892863903085368	239	GPR1	0.01892863903085368	0.0	239	KRT78	0.017482517482517484	239	KRT78	0.01748251748251748	3.469446951953614E-18
240	SFMBT2	0.01567152483936687	240	SFMBT2	0.01567152483936687	0.0	240	LRRK1	0.01722356183258698	240	LRRK1	0.017223561832586977	3.469446951953614E-18	240	ARHGAP30	0.015213753232922561	240	ARHGAP30	0.015213753232922563	1.734723475976807E-18	240	ARHGAP9	0.01712035610340695	240	ARHGAP9	0.01712035610340695	0.0	240	ACSL4	0.01892863903085368	240	ACSL4	0.01892863903085368	0.0	240	AGR2	0.017482517482517484	240	AGR2	0.01748251748251748	3.469446951953614E-18
241	CHI3L2	0.01567152483936687	241	CHI3L2	0.01567152483936687	0.0	241	CAP1	0.01722356183258698	241	CAP1	0.017223561832586977	3.469446951953614E-18	241	PTCH2	0.015213753232922561	241	PTCH2	0.015213753232922563	1.734723475976807E-18	241	CHIC2	0.01712035610340695	241	CHIC2	0.01712035610340695	0.0	241	GRB2	0.01892863903085368	241	GRB2	0.01892863903085368	0.0	241	SLC16A6	0.017482517482517484	241	SLC16A6	0.01748251748251748	3.469446951953614E-18
242	SDF2L1	0.01567152483936687	242	SDF2L1	0.01567152483936687	0.0	242	IL4R	0.01722356183258698	242	IL4R	0.017223561832586977	3.469446951953614E-18	242	CMKLR1	0.015213753232922561	242	CMKLR1	0.015213753232922563	1.734723475976807E-18	242	WDR47	0.01712035610340695	242	WDR47	0.01712035610340695	0.0	242	SLC16A13	0.01892863903085368	242	SLC16A13	0.01892863903085368	0.0	242	ARHGAP30	0.017482517482517484	242	ARHGAP30	0.01748251748251748	3.469446951953614E-18
243	ASB8	0.01567152483936687	243	ASB8	0.01567152483936687	0.0	243	RHOH	0.01722356183258698	243	RHOH	0.017223561832586977	3.469446951953614E-18	243	TRPM1	0.015213753232922561	243	TRPM1	0.015213753232922563	1.734723475976807E-18	243	TNFRSF9	0.01712035610340695	243	TNFRSF9	0.01712035610340695	0.0	243	RASSF5	0.01892863903085368	243	RASSF5	0.01892863903085368	0.0	243	DCAF6	0.017482517482517484	243	DCAF6	0.01748251748251748	3.469446951953614E-18
244	CLEC1A	0.01567152483936687	244	CLEC1A	0.01567152483936687	0.0	244	ETHE1	0.01722356183258698	244	ETHE1	0.017223561832586977	3.469446951953614E-18	244	DCN	0.015213753232922561	244	DCN	0.015213753232922563	1.734723475976807E-18	244	MGLL	0.01712035610340695	244	MGLL	0.01712035610340695	0.0	244	KCND3	0.01892863903085368	244	KCND3	0.01892863903085368	0.0	244	CMKLR1	0.017482517482517484	244	CMKLR1	0.01748251748251748	3.469446951953614E-18
245	CLEC1B	0.01567152483936687	245	CLEC1B	0.01567152483936687	0.0	245	CYBA	0.01722356183258698	245	CYBA	0.017223561832586977	3.469446951953614E-18	245	GSDMA	0.015213753232922561	245	GSDMA	0.015213753232922563	1.734723475976807E-18	245	PPARD	0.01712035610340695	245	PPARD	0.01712035610340695	0.0	245	LRRK1	0.01892863903085368	245	LRRK1	0.01892863903085368	0.0	245	DCN	0.017482517482517484	245	DCN	0.01748251748251748	3.469446951953614E-18
246	SLC47A1	0.01567152483936687	246	SLC47A1	0.01567152483936687	0.0	246	BATF2	0.01722356183258698	246	BATF2	0.017223561832586977	3.469446951953614E-18	246	PTAFR	0.015213753232922561	246	PTAFR	0.015213753232922563	1.734723475976807E-18	246	ARPC5	0.01712035610340695	246	ARPC5	0.01712035610340695	0.0	246	CAP1	0.01892863903085368	246	CAP1	0.01892863903085368	0.0	246	PTAFR	0.017482517482517484	246	PTAFR	0.01748251748251748	3.469446951953614E-18
247	IL31RA	0.01567152483936687	247	IL31RA	0.01567152483936687	0.0	247	KDM1B	0.01722356183258698	247	KDM1B	0.017223561832586977	3.469446951953614E-18	247	ATP6V0D1	0.015213753232922561	247	ATP6V0D1	0.015213753232922563	1.734723475976807E-18	247	CD14	0.01712035610340695	247	CD14	0.01712035610340695	0.0	247	IL4R	0.01892863903085368	247	IL4R	0.01892863903085368	0.0	247	ATP6V0D1	0.017482517482517484	247	ATP6V0D1	0.01748251748251748	3.469446951953614E-18
248	CARD9	0.01567152483936687	248	CARD9	0.01567152483936687	0.0	248	HPGD	0.01722356183258698	248	HPGD	0.017223561832586977	3.469446951953614E-18	248	SLC15A3	0.015213753232922561	248	SLC15A3	0.015213753232922563	1.734723475976807E-18	248	RAP1A	0.01712035610340695	248	RAP1A	0.01712035610340695	0.0	248	RNF43	0.01892863903085368	248	RNF43	0.01892863903085368	0.0	248	SLC15A3	0.017482517482517484	248	SLC15A3	0.01748251748251748	3.469446951953614E-18
249	PDE8A	0.01567152483936687	249	PDE8A	0.01567152483936687	0.0	249	FCER1G	0.01722356183258698	249	FCER1G	0.017223561832586977	3.469446951953614E-18	249	SLC15A4	0.015213753232922561	249	SLC15A4	0.015213753232922563	1.734723475976807E-18	249	AKR7A2	0.01712035610340695	249	AKR7A2	0.01712035610340695	0.0	249	CAPS	0.01892863903085368	249	CAPS	0.01892863903085368	0.0	249	DCDC2	0.017482517482517484	249	DCDC2	0.01748251748251748	3.469446951953614E-18
250	SYPL2	0.01567152483936687	250	SYPL2	0.01567152483936687	0.0	250	APAF1	0.01722356183258698	250	APAF1	0.017223561832586977	3.469446951953614E-18	250	RBM47	0.015213753232922561	250	RBM47	0.015213753232922563	1.734723475976807E-18	250	FAM110A	0.01712035610340695	250	FAM110A	0.01712035610340695	0.0	250	PTGES	0.01892863903085368	250	PTGES	0.01892863903085368	0.0	250	SLC22A15	0.017482517482517484	250	SLC22A15	0.01748251748251748	3.469446951953614E-18
251	FABP7	0.01567152483936687	251	FABP7	0.01567152483936687	0.0	251	RGL1	0.01722356183258698	251	RGL1	0.017223561832586977	3.469446951953614E-18	251	DCDC2	0.015213753232922561	251	DCDC2	0.015213753232922563	1.734723475976807E-18	251	CAPG	0.01712035610340695	251	CAPG	0.01712035610340695	0.0	251	ETHE1	0.01892863903085368	251	ETHE1	0.01892863903085368	0.0	251	EPGN	0.017482517482517484	251	EPGN	0.01748251748251748	3.469446951953614E-18
252	CD300C	0.01567152483936687	252	CD300C	0.01567152483936687	0.0	252	ZFP36L2	0.01722356183258698	252	ZFP36L2	0.017223561832586977	3.469446951953614E-18	252	SLC22A15	0.015213753232922561	252	SLC22A15	0.015213753232922563	1.734723475976807E-18	252	ABCG2	0.01712035610340695	252	ABCG2	0.01712035610340695	0.0	252	GREM2	0.01892863903085368	252	GREM2	0.01892863903085368	0.0	252	C16orf71	0.017482517482517484	252	C16orf71	0.01748251748251748	3.469446951953614E-18
253	IL10RB	0.01567152483936687	253	IL10RB	0.01567152483936687	0.0	253	TACC1	0.01722356183258698	253	TACC1	0.017223561832586977	3.469446951953614E-18	253	C16orf71	0.015213753232922561	253	C16orf71	0.015213753232922563	1.734723475976807E-18	253	ANKRD22	0.01712035610340695	253	ANKRD22	0.01712035610340695	0.0	253	FBXL15	0.01892863903085368	253	FBXL15	0.01892863903085368	0.0	253	GAB3	0.017482517482517484	253	GAB3	0.01748251748251748	3.469446951953614E-18
254	BCDIN3D	0.01567152483936687	254	BCDIN3D	0.01567152483936687	0.0	254	KIAA0513	0.01722356183258698	254	KIAA0513	0.017223561832586977	3.469446951953614E-18	254	ZNF221	0.015213753232922561	254	ZNF221	0.015213753232922563	1.734723475976807E-18	254	RAB33A	0.01712035610340695	254	RAB33A	0.01712035610340695	0.0	254	CYBA	0.01892863903085368	254	CYBA	0.01892863903085368	0.0	254	ARHGAP6	0.017482517482517484	254	ARHGAP6	0.01748251748251748	3.469446951953614E-18
255	SERINC1	0.01567152483936687	255	SERINC1	0.01567152483936687	0.0	255	HIVEP3	0.01722356183258698	255	HIVEP3	0.017223561832586977	3.469446951953614E-18	255	GAB2	0.015213753232922561	255	GAB2	0.015213753232922563	1.734723475976807E-18	255	SLFN12L	0.01712035610340695	255	SLFN12L	0.01712035610340695	0.0	255	DNAI2	0.01892863903085368	255	DNAI2	0.01892863903085368	0.0	255	DNAJB12	0.017482517482517484	255	DNAJB12	0.01748251748251748	3.469446951953614E-18
256	SERINC3	0.01567152483936687	256	SERINC3	0.01567152483936687	0.0	256	P2RX1	0.01722356183258698	256	P2RX1	0.017223561832586977	3.469446951953614E-18	256	GAB3	0.015213753232922561	256	GAB3	0.015213753232922563	1.734723475976807E-18	256	ATPAF2	0.01712035610340695	256	ATPAF2	0.01712035610340695	0.0	256	RGL1	0.01892863903085368	256	RGL1	0.01892863903085368	0.0	256	RNF135	0.017482517482517484	256	RNF135	0.01748251748251748	3.469446951953614E-18
257	ITIH5	0.01567152483936687	257	ITIH5	0.01567152483936687	0.0	257	CORO7	0.01722356183258698	257	CORO7	0.017223561832586977	3.469446951953614E-18	257	UPB1	0.015213753232922561	257	UPB1	0.015213753232922563	1.734723475976807E-18	257	NCKAP1L	0.01712035610340695	257	NCKAP1L	0.01712035610340695	0.0	257	ADA	0.01892863903085368	257	ADA	0.01892863903085368	0.0	257	TSHZ2	0.017482517482517484	257	TSHZ2	0.01748251748251748	3.469446951953614E-18
258	MFSD2A	0.01567152483936687	258	MFSD2A	0.01567152483936687	0.0	258	KCNK6	0.01722356183258698	258	KCNK6	0.017223561832586977	3.469446951953614E-18	258	ARHGAP6	0.015213753232922561	258	ARHGAP6	0.015213753232922563	1.734723475976807E-18	258	DOCK2	0.01712035610340695	258	DOCK2	0.01712035610340695	0.0	258	KIAA0513	0.01892863903085368	258	KIAA0513	0.01892863903085368	0.0	258	TIPARP	0.017482517482517484	258	TIPARP	0.01748251748251748	3.469446951953614E-18
259	TNS3	0.01567152483936687	259	TNS3	0.01567152483936687	0.0	259	VPS13C	0.01722356183258698	259	VPS13C	0.017223561832586977	3.469446951953614E-18	259	DNAJB12	0.015213753232922561	259	DNAJB12	0.015213753232922563	1.734723475976807E-18	259	LPCAT2	0.01712035610340695	259	LPCAT2	0.01712035610340695	0.0	259	HIVEP3	0.01892863903085368	259	HIVEP3	0.01892863903085368	0.0	259	CYB561D1	0.017482517482517484	259	CYB561D1	0.01748251748251748	3.469446951953614E-18
260	PODN	0.01567152483936687	260	PODN	0.01567152483936687	0.0	260	EVI2B	0.01722356183258698	260	EVI2B	0.017223561832586977	3.469446951953614E-18	260	RNF135	0.015213753232922561	260	RNF135	0.015213753232922563	1.734723475976807E-18	260	CAPNS2	0.01712035610340695	260	CAPNS2	0.01712035610340695	0.0	260	ACVR1	0.01892863903085368	260	ACVR1	0.01892863903085368	0.0	260	NNMT	0.017482517482517484	260	NNMT	0.01748251748251748	3.469446951953614E-18
261	IGFBP6	0.01567152483936687	261	IGFBP6	0.01567152483936687	0.0	261	FOXN2	0.01722356183258698	261	FOXN2	0.017223561832586977	3.469446951953614E-18	261	ANXA13	0.015213753232922561	261	ANXA13	0.015213753232922563	1.734723475976807E-18	261	CDK19	0.01712035610340695	261	CDK19	0.01712035610340695	0.0	261	CORO7	0.01892863903085368	261	CORO7	0.01892863903085368	0.0	261	LRCH1	0.017482517482517484	261	LRCH1	0.01748251748251748	3.469446951953614E-18
262	IGFBP4	0.01567152483936687	262	IGFBP4	0.01567152483936687	0.0	262	IL6ST	0.01722356183258698	262	IL6ST	0.017223561832586977	3.469446951953614E-18	262	TIPARP	0.015213753232922561	262	TIPARP	0.015213753232922563	1.734723475976807E-18	262	LPIN2	0.01712035610340695	262	LPIN2	0.01712035610340695	0.0	262	TMEM164	0.01892863903085368	262	TMEM164	0.01892863903085368	0.0	262	GRK4	0.017482517482517484	262	GRK4	0.01748251748251748	3.469446951953614E-18
263	CKLF	0.01567152483936687	263	CKLF	0.01567152483936687	0.0	263	COMMD9	0.01722356183258698	263	COMMD9	0.017223561832586977	3.469446951953614E-18	263	MCHR2	0.015213753232922561	263	MCHR2	0.015213753232922563	1.734723475976807E-18	263	KLF6	0.01712035610340695	263	KLF6	0.01712035610340695	0.0	263	EVI2B	0.01892863903085368	263	EVI2B	0.01892863903085368	0.0	263	BAG3	0.017482517482517484	263	BAG3	0.01748251748251748	3.469446951953614E-18
264	RGS18	0.01567152483936687	264	RGS18	0.01567152483936687	0.0	264	PTGER4	0.01722356183258698	264	PTGER4	0.017223561832586977	3.469446951953614E-18	264	TNP2	0.015213753232922561	264	TNP2	0.015213753232922563	1.734723475976807E-18	264	KLF9	0.01712035610340695	264	KLF9	0.01712035610340695	0.0	264	IL6ST	0.01892863903085368	264	IL6ST	0.01892863903085368	0.0	264	ARRB2	0.017482517482517484	264	ARRB2	0.01748251748251748	3.469446951953614E-18
265	TRIM8	0.01567152483936687	265	TRIM8	0.01567152483936687	0.0	265	LMBRD2	0.01722356183258698	265	LMBRD2	0.017223561832586977	3.469446951953614E-18	265	CYB561D1	0.015213753232922561	265	CYB561D1	0.015213753232922563	1.734723475976807E-18	265	ACER3	0.01712035610340695	265	ACER3	0.01712035610340695	0.0	265	UPP2	0.01892863903085368	265	UPP2	0.01892863903085368	0.0	265	RASGRF1	0.017482517482517484	265	RASGRF1	0.01748251748251748	3.469446951953614E-18
266	BTC	0.01567152483936687	266	BTC	0.01567152483936687	0.0	266	B3GALT4	0.01722356183258698	266	B3GALT4	0.017223561832586977	3.469446951953614E-18	266	NNMT	0.015213753232922561	266	NNMT	0.015213753232922563	1.734723475976807E-18	266	P2RY8	0.01712035610340695	266	P2RY8	0.01712035610340695	0.0	266	B3GALT4	0.01892863903085368	266	B3GALT4	0.01892863903085368	0.0	266	CHMP3	0.017482517482517484	266	CHMP3	0.01748251748251748	3.469446951953614E-18
267	EPHX4	0.01567152483936687	267	EPHX4	0.01567152483936687	0.0	267	B3GALT2	0.01722356183258698	267	B3GALT2	0.017223561832586977	3.469446951953614E-18	267	LRCH1	0.015213753232922561	267	LRCH1	0.015213753232922563	1.734723475976807E-18	267	LRRC43	0.01712035610340695	267	LRRC43	0.01712035610340695	0.0	267	APBA1	0.01892863903085368	267	APBA1	0.01892863903085368	0.0	267	ADAMTS18	0.017482517482517484	267	ADAMTS18	0.01748251748251748	3.469446951953614E-18
268	TMC8	0.01567152483936687	268	TMC8	0.01567152483936687	0.0	268	GRAMD4	0.01722356183258698	268	GRAMD4	0.017223561832586977	3.469446951953614E-18	268	EIF4EBP3	0.015213753232922561	268	EIF4EBP3	0.015213753232922563	1.734723475976807E-18	268	IKBKE	0.01712035610340695	268	IKBKE	0.01712035610340695	0.0	268	CXCL16	0.01892863903085368	268	CXCL16	0.01892863903085368	0.0	268	DENND3	0.017482517482517484	268	DENND3	0.01748251748251748	3.469446951953614E-18
269	CD300LF	0.01567152483936687	269	CD300LF	0.01567152483936687	0.0	269	MTUS1	0.01722356183258698	269	MTUS1	0.017223561832586977	3.469446951953614E-18	269	MS4A10	0.015213753232922561	269	MS4A10	0.015213753232922563	1.734723475976807E-18	269	B3GNT5	0.01712035610340695	269	B3GNT5	0.01712035610340695	0.0	269	AKAP6	0.01892863903085368	269	AKAP6	0.01892863903085368	0.0	269	DEF6	0.017482517482517484	269	DEF6	0.01748251748251748	3.469446951953614E-18
270	TXNIP	0.01567152483936687	270	TXNIP	0.01567152483936687	0.0	270	APBA1	0.01722356183258698	270	APBA1	0.017223561832586977	3.469446951953614E-18	270	GRK4	0.015213753232922561	270	GRK4	0.015213753232922563	1.734723475976807E-18	270	NABP1	0.01712035610340695	270	NABP1	0.01712035610340695	0.0	270	DBNL	0.01892863903085368	270	DBNL	0.01892863903085368	0.0	270	C9	0.017482517482517484	270	C9	0.01748251748251748	3.469446951953614E-18
271	ADAP1	0.01567152483936687	271	ADAP1	0.01567152483936687	0.0	271	CXCL16	0.01722356183258698	271	CXCL16	0.017223561832586977	3.469446951953614E-18	271	GRK5	0.015213753232922561	271	GRK5	0.015213753232922563	1.734723475976807E-18	271	EDEM1	0.01712035610340695	271	EDEM1	0.01712035610340695	0.0	271	CAGE1	0.01892863903085368	271	CAGE1	0.01892863903085368	0.0	271	PSMA6	0.017482517482517484	271	PSMA6	0.01748251748251748	3.469446951953614E-18
272	MECOM	0.01567152483936687	272	MECOM	0.01567152483936687	0.0	272	AKAP6	0.01722356183258698	272	AKAP6	0.017223561832586977	3.469446951953614E-18	272	RASGRF1	0.015213753232922561	272	RASGRF1	0.015213753232922563	1.734723475976807E-18	272	SNAI3	0.01712035610340695	272	SNAI3	0.01712035610340695	0.0	272	CD1C	0.01892863903085368	272	CD1C	0.01892863903085368	0.0	272	SLC6A12	0.017482517482517484	272	SLC6A12	0.01748251748251748	3.469446951953614E-18
273	TRADD	0.01567152483936687	273	TRADD	0.01567152483936687	0.0	273	DBNL	0.01722356183258698	273	DBNL	0.017223561832586977	3.469446951953614E-18	273	CHMP3	0.015213753232922561	273	CHMP3	0.015213753232922563	1.734723475976807E-18	273	SLC2A6	0.01712035610340695	273	SLC2A6	0.01712035610340695	0.0	273	RAB7A	0.01892863903085368	273	RAB7A	0.01892863903085368	0.0	273	SLC6A17	0.017482517482517484	273	SLC6A17	0.01748251748251748	3.469446951953614E-18
274	CYB5D2	0.01567152483936687	274	CYB5D2	0.01567152483936687	0.0	274	CAGE1	0.01722356183258698	274	CAGE1	0.017223561832586977	3.469446951953614E-18	274	DENND3	0.015213753232922561	274	DENND3	0.015213753232922563	1.734723475976807E-18	274	DYNLT3	0.01712035610340695	274	DYNLT3	0.01712035610340695	0.0	274	ARHGAP9	0.01892863903085368	274	ARHGAP9	0.01892863903085368	0.0	274	ARHGAP25	0.017482517482517484	274	ARHGAP25	0.01748251748251748	3.469446951953614E-18
275	SIPA1	0.01567152483936687	275	SIPA1	0.01567152483936687	0.0	275	FAM20C	0.01722356183258698	275	FAM20C	0.017223561832586977	3.469446951953614E-18	275	C9	0.015213753232922561	275	C9	0.015213753232922563	1.734723475976807E-18	275	RHD	0.01712035610340695	275	RHD	0.01712035610340695	0.0	275	GPR137B	0.01892863903085368	275	GPR137B	0.01892863903085368	0.0	275	GALC	0.017482517482517484	275	GALC	0.01748251748251748	3.469446951953614E-18
276	CDKN1A	0.01567152483936687	276	CDKN1A	0.01567152483936687	0.0	276	CD1C	0.01722356183258698	276	CD1C	0.017223561832586977	3.469446951953614E-18	276	SLC6A12	0.015213753232922561	276	SLC6A12	0.015213753232922563	1.734723475976807E-18	276	TNFAIP8L2	0.01712035610340695	276	TNFAIP8L2	0.01712035610340695	0.0	276	HIP1R	0.01892863903085368	276	HIP1R	0.01892863903085368	0.0	276	GALM	0.017482517482517484	276	GALM	0.01748251748251748	3.469446951953614E-18
277	TGFBR3	0.01567152483936687	277	TGFBR3	0.01567152483936687	0.0	277	TMEM170B	0.01722356183258698	277	TMEM170B	0.017223561832586977	3.469446951953614E-18	277	SRC	0.015213753232922561	277	SRC	0.015213753232922563	1.734723475976807E-18	277	TNFAIP8L1	0.01712035610340695	277	TNFAIP8L1	0.01712035610340695	0.0	277	CHIC2	0.01892863903085368	277	CHIC2	0.01892863903085368	0.0	277	LGALS1	0.017482517482517484	277	LGALS1	0.01748251748251748	3.469446951953614E-18
278	CLIC3	0.01567152483936687	278	CLIC3	0.01567152483936687	0.0	278	ARHGAP9	0.01722356183258698	278	ARHGAP9	0.017223561832586977	3.469446951953614E-18	278	ARHGAP25	0.015213753232922561	278	ARHGAP25	0.015213753232922563	1.734723475976807E-18	278	ADAMTSL5	0.01712035610340695	278	ADAMTSL5	0.01712035610340695	0.0	278	TNFRSF9	0.01892863903085368	278	TNFRSF9	0.01892863903085368	0.0	278	KCNJ1	0.017482517482517484	278	KCNJ1	0.01748251748251748	3.469446951953614E-18
279	ASGR2	0.01567152483936687	279	ASGR2	0.01567152483936687	0.0	279	CHIC2	0.01722356183258698	279	CHIC2	0.017223561832586977	3.469446951953614E-18	279	SRL	0.015213753232922561	279	SRL	0.015213753232922563	1.734723475976807E-18	279	TCP11L2	0.01712035610340695	279	TCP11L2	0.01712035610340695	0.0	279	TBC1D2B	0.01892863903085368	279	TBC1D2B	0.01892863903085368	0.0	279	TAPBP	0.017482517482517484	279	TAPBP	0.01748251748251748	3.469446951953614E-18
280	TMEM144	0.01567152483936687	280	TMEM144	0.01567152483936687	0.0	280	WDR47	0.01722356183258698	280	WDR47	0.017223561832586977	3.469446951953614E-18	280	GUCD1	0.015213753232922561	280	GUCD1	0.015213753232922563	1.734723475976807E-18	280	CEACAM4	0.01712035610340695	280	CEACAM4	0.01712035610340695	0.0	280	TMEM91	0.01892863903085368	280	TMEM91	0.01892863903085368	0.0	280	ADRB3	0.017482517482517484	280	ADRB3	0.01748251748251748	3.469446951953614E-18
281	IL21R	0.01567152483936687	281	IL21R	0.01567152483936687	0.0	281	TNFRSF9	0.01722356183258698	281	TNFRSF9	0.017223561832586977	3.469446951953614E-18	281	GALC	0.015213753232922561	281	GALC	0.015213753232922563	1.734723475976807E-18	281	ANGPT2	0.01712035610340695	281	ANGPT2	0.01712035610340695	0.0	281	MGLL	0.01892863903085368	281	MGLL	0.01892863903085368	0.0	281	VMO1	0.017482517482517484	281	VMO1	0.01748251748251748	3.469446951953614E-18
282	CYP24A1	0.01567152483936687	282	CYP24A1	0.01567152483936687	0.0	282	MGLL	0.01722356183258698	282	MGLL	0.017223561832586977	3.469446951953614E-18	282	GALM	0.015213753232922561	282	GALM	0.015213753232922563	1.734723475976807E-18	282	TLDC2	0.01712035610340695	282	TLDC2	0.01712035610340695	0.0	282	CYSTM1	0.01892863903085368	282	CYSTM1	0.01892863903085368	0.0	282	AGPAT2	0.017482517482517484	282	AGPAT2	0.01748251748251748	3.469446951953614E-18
283	LRRC32	0.01567152483936687	283	LRRC32	0.01567152483936687	0.0	283	PPARD	0.01722356183258698	283	PPARD	0.017223561832586977	3.469446951953614E-18	283	LGALS1	0.015213753232922561	283	LGALS1	0.015213753232922563	1.734723475976807E-18	283	PLEK2	0.01712035610340695	283	PLEK2	0.01712035610340695	0.0	283	CD14	0.01892863903085368	283	CD14	0.01892863903085368	0.0	283	PHC2	0.017482517482517484	283	PHC2	0.01748251748251748	3.469446951953614E-18
284	TMEM52B	0.01567152483936687	284	TMEM52B	0.01567152483936687	0.0	284	ARPC5	0.01722356183258698	284	ARPC5	0.017223561832586977	3.469446951953614E-18	284	KCNJ1	0.015213753232922561	284	KCNJ1	0.015213753232922563	1.734723475976807E-18	284	C1orf56	0.01712035610340695	284	C1orf56	0.01712035610340695	0.0	284	MPP1	0.01892863903085368	284	MPP1	0.01892863903085368	0.0	284	PLAUR	0.017482517482517484	284	PLAUR	0.01748251748251748	3.469446951953614E-18
285	HLA-DPA1	0.01567152483936687	285	HLA-DPA1	0.01567152483936687	0.0	285	CD14	0.01722356183258698	285	CD14	0.017223561832586977	3.469446951953614E-18	285	TAPBP	0.015213753232922561	285	TAPBP	0.015213753232922563	1.734723475976807E-18	285	PSMB10	0.01712035610340695	285	PSMB10	0.01712035610340695	0.0	285	CAPG	0.01892863903085368	285	CAPG	0.01892863903085368	0.0	285	TMEM156	0.017482517482517484	285	TMEM156	0.01748251748251748	3.469446951953614E-18
286	F2RL2	0.01567152483936687	286	F2RL2	0.01567152483936687	0.0	286	MPP1	0.01722356183258698	286	MPP1	0.017223561832586977	3.469446951953614E-18	286	VMO1	0.015213753232922561	286	VMO1	0.015213753232922563	1.734723475976807E-18	286	SMPD3	0.01712035610340695	286	SMPD3	0.01712035610340695	0.0	286	ACKR3	0.01892863903085368	286	ACKR3	0.01892863903085368	0.0	286	LRRC29	0.017482517482517484	286	LRRC29	0.01748251748251748	3.469446951953614E-18
287	CHPF2	0.01567152483936687	287	CHPF2	0.01567152483936687	0.0	287	CEP85L	0.01722356183258698	287	CEP85L	0.017223561832586977	3.469446951953614E-18	287	AGPAT2	0.015213753232922561	287	AGPAT2	0.015213753232922563	1.734723475976807E-18	287	SASH3	0.01712035610340695	287	SASH3	0.01712035610340695	0.0	287	ATOH8	0.01892863903085368	287	ATOH8	0.01892863903085368	0.0	287	RAB3IL1	0.017482517482517484	287	RAB3IL1	0.01748251748251748	3.469446951953614E-18
288	TOR1B	0.01567152483936687	288	TOR1B	0.01567152483936687	0.0	288	RAP1A	0.01722356183258698	288	RAP1A	0.017223561832586977	3.469446951953614E-18	288	PHC2	0.015213753232922561	288	PHC2	0.015213753232922563	1.734723475976807E-18	288	CFLAR	0.01712035610340695	288	CFLAR	0.01712035610340695	0.0	288	CORO2B	0.01892863903085368	288	CORO2B	0.01892863903085368	0.0	288	RGS1	0.017482517482517484	288	RGS1	0.01748251748251748	3.469446951953614E-18
289	ST3GAL1	0.01567152483936687	289	ST3GAL1	0.01567152483936687	0.0	289	CAPG	0.01722356183258698	289	CAPG	0.017223561832586977	3.469446951953614E-18	289	PLAUR	0.015213753232922561	289	PLAUR	0.015213753232922563	1.734723475976807E-18	289	PATL2	0.01712035610340695	289	PATL2	0.01712035610340695	0.0	289	SORT1	0.01892863903085368	289	SORT1	0.01892863903085368	0.0	289	SIRPB2	0.017482517482517484	289	SIRPB2	0.01748251748251748	3.469446951953614E-18
290	VASN	0.01567152483936687	290	VASN	0.01567152483936687	0.0	290	ATOH8	0.01722356183258698	290	ATOH8	0.017223561832586977	3.469446951953614E-18	290	ECM2	0.015213753232922561	290	ECM2	0.015213753232922563	1.734723475976807E-18	290	ACOX1	0.01712035610340695	290	ACOX1	0.01712035610340695	0.0	290	ANKRD22	0.01892863903085368	290	ANKRD22	0.01892863903085368	0.0	290	CYP1B1	0.017482517482517484	290	CYP1B1	0.01748251748251748	3.469446951953614E-18
291	ST3GAL5	0.01567152483936687	291	ST3GAL5	0.01567152483936687	0.0	291	ADCY10	0.01722356183258698	291	ADCY10	0.017223561832586977	3.469446951953614E-18	291	TMEM156	0.015213753232922561	291	TMEM156	0.015213753232922563	1.734723475976807E-18	291	CFD	0.01712035610340695	291	CFD	0.01712035610340695	0.0	291	SLFN12L	0.01892863903085368	291	SLFN12L	0.01892863903085368	0.0	291	SIRPB1	0.017482517482517484	291	SIRPB1	0.01748251748251748	3.469446951953614E-18
292	GALNS	0.01567152483936687	292	GALNS	0.01567152483936687	0.0	292	ABCG2	0.01722356183258698	292	ABCG2	0.017223561832586977	3.469446951953614E-18	292	ALDH1A1	0.015213753232922561	292	ALDH1A1	0.015213753232922563	1.734723475976807E-18	292	TMEM169	0.01712035610340695	292	TMEM169	0.01712035610340695	0.0	292	DIRAS3	0.01892863903085368	292	DIRAS3	0.01892863903085368	0.0	292	SERTAD2	0.017482517482517484	292	SERTAD2	0.01748251748251748	3.469446951953614E-18
293	FCGR2A	0.01567152483936687	293	FCGR2A	0.01567152483936687	0.0	293	ANKRD22	0.01722356183258698	293	ANKRD22	0.017223561832586977	3.469446951953614E-18	293	LRRC29	0.015213753232922561	293	LRRC29	0.015213753232922563	1.734723475976807E-18	293	FUT7	0.01712035610340695	293	FUT7	0.01712035610340695	0.0	293	ATPAF2	0.01892863903085368	293	ATPAF2	0.01892863903085368	0.0	293	PIGR	0.017482517482517484	293	PIGR	0.01748251748251748	3.469446951953614E-18
294	CYTH1	0.01567152483936687	294	CYTH1	0.01567152483936687	0.0	294	SLFN12L	0.01722356183258698	294	SLFN12L	0.017223561832586977	3.469446951953614E-18	294	GCNT3	0.015213753232922561	294	GCNT3	0.015213753232922563	1.734723475976807E-18	294	ELAC1	0.01712035610340695	294	ELAC1	0.01712035610340695	0.0	294	NCKAP1L	0.01892863903085368	294	NCKAP1L	0.01892863903085368	0.0	294	KLHL6	0.017482517482517484	294	KLHL6	0.01748251748251748	3.469446951953614E-18
295	NIM1K	0.01567152483936687	295	NIM1K	0.01567152483936687	0.0	295	NCKAP1L	0.01722356183258698	295	NCKAP1L	0.017223561832586977	3.469446951953614E-18	295	SLC48A1	0.015213753232922561	295	SLC48A1	0.015213753232922563	1.734723475976807E-18	295	IL18RAP	0.01712035610340695	295	IL18RAP	0.01712035610340695	0.0	295	DOCK2	0.01892863903085368	295	DOCK2	0.01892863903085368	0.0	295	OLR1	0.017482517482517484	295	OLR1	0.01748251748251748	3.469446951953614E-18
296	IL6R	0.01567152483936687	296	IL6R	0.01567152483936687	0.0	296	DOCK2	0.01722356183258698	296	DOCK2	0.017223561832586977	3.469446951953614E-18	296	TGOLN2	0.015213753232922561	296	TGOLN2	0.015213753232922563	1.734723475976807E-18	296	SUN2	0.01712035610340695	296	SUN2	0.01712035610340695	0.0	296	LPCAT2	0.01892863903085368	296	LPCAT2	0.01892863903085368	0.0	296	COL6A3	0.017482517482517484	296	COL6A3	0.01748251748251748	3.469446951953614E-18
297	LACC1	0.01567152483936687	297	LACC1	0.01567152483936687	0.0	297	LPCAT2	0.01722356183258698	297	LPCAT2	0.017223561832586977	3.469446951953614E-18	297	TDRD3	0.015213753232922561	297	TDRD3	0.015213753232922563	1.734723475976807E-18	297	ADCK5	0.01712035610340695	297	ADCK5	0.01712035610340695	0.0	297	CAPNS2	0.01892863903085368	297	CAPNS2	0.01892863903085368	0.0	297	PTGS1	0.017482517482517484	297	PTGS1	0.01748251748251748	3.469446951953614E-18
298	AGR2	0.01567152483936687	298	AGR2	0.01567152483936687	0.0	298	CAPNS2	0.01722356183258698	298	CAPNS2	0.017223561832586977	3.469446951953614E-18	298	RGS1	0.015213753232922561	298	RGS1	0.015213753232922563	1.734723475976807E-18	298	ADCK2	0.01712035610340695	298	ADCK2	0.01712035610340695	0.0	298	CDK19	0.01892863903085368	298	CDK19	0.01892863903085368	0.0	298	CCR2	0.017482517482517484	298	CCR2	0.01748251748251748	3.469446951953614E-18
299	AGR3	0.01567152483936687	299	AGR3	0.01567152483936687	0.0	299	CDK19	0.01722356183258698	299	CDK19	0.017223561832586977	3.469446951953614E-18	299	SIRPB2	0.015213753232922561	299	SIRPB2	0.015213753232922563	1.734723475976807E-18	299	SLFN11	0.01712035610340695	299	SLFN11	0.01712035610340695	0.0	299	LPIN2	0.01892863903085368	299	LPIN2	0.01892863903085368	0.0	299	FBP1	0.017482517482517484	299	FBP1	0.01748251748251748	3.469446951953614E-18
300	SLC16A6	0.01567152483936687	300	SLC16A6	0.01567152483936687	0.0	300	LPIN2	0.01722356183258698	300	LPIN2	0.017223561832586977	3.469446951953614E-18	300	CYP1B1	0.015213753232922561	300	CYP1B1	0.015213753232922563	1.734723475976807E-18	300	FFAR2	0.01712035610340695	300	FFAR2	0.01712035610340695	0.0	300	LPIN1	0.01892863903085368	300	LPIN1	0.01892863903085368	0.0	300	SMAP2	0.017482517482517484	300	SMAP2	0.01748251748251748	3.469446951953614E-18
301	ARHGAP30	0.01567152483936687	301	ARHGAP30	0.01567152483936687	0.0	301	KLF6	0.01722356183258698	301	KLF6	0.017223561832586977	3.469446951953614E-18	301	PRB1	0.015213753232922561	301	PRB1	0.015213753232922563	1.734723475976807E-18	301	CKLF-CMTM1	0.01712035610340695	301	CKLF-CMTM1	0.01712035610340695	0.0	301	KLF6	0.01892863903085368	301	KLF6	0.01892863903085368	0.0	301	NTRK1	0.017482517482517484	301	NTRK1	0.01748251748251748	3.469446951953614E-18
302	PTCH2	0.01567152483936687	302	PTCH2	0.01567152483936687	0.0	302	KLF9	0.01722356183258698	302	KLF9	0.017223561832586977	3.469446951953614E-18	302	SIRPB1	0.015213753232922561	302	SIRPB1	0.015213753232922563	1.734723475976807E-18	302	ITPR1	0.01712035610340695	302	ITPR1	0.01712035610340695	0.0	302	KLF5	0.01892863903085368	302	KLF5	0.01892863903085368	0.0	302	ARHGAP24	0.017482517482517484	302	ARHGAP24	0.01748251748251748	3.469446951953614E-18
303	CMKLR1	0.01567152483936687	303	CMKLR1	0.01567152483936687	0.0	303	ACER3	0.01722356183258698	303	ACER3	0.017223561832586977	3.469446951953614E-18	303	SERTAD2	0.015213753232922561	303	SERTAD2	0.015213753232922563	1.734723475976807E-18	303	FUT8	0.01712035610340695	303	FUT8	0.01712035610340695	0.0	303	VWCE	0.01892863903085368	303	VWCE	0.01892863903085368	0.0	303	HHAT	0.017482517482517484	303	HHAT	0.01748251748251748	3.469446951953614E-18
304	CD34	0.01567152483936687	304	CD34	0.01567152483936687	0.0	304	P2RY8	0.01722356183258698	304	P2RY8	0.017223561832586977	3.469446951953614E-18	304	PIGR	0.015213753232922561	304	PIGR	0.015213753232922563	1.734723475976807E-18	304	MYZAP	0.01712035610340695	304	MYZAP	0.01712035610340695	0.0	304	ACER3	0.01892863903085368	304	ACER3	0.01892863903085368	0.0	304	CD22	0.017482517482517484	304	CD22	0.01748251748251748	3.469446951953614E-18
305	PAM	0.01567152483936687	305	PAM	0.01567152483936687	0.0	305	CPVL	0.01722356183258698	305	CPVL	0.017223561832586977	3.469446951953614E-18	305	CATSPERD	0.015213753232922561	305	CATSPERD	0.015213753232922563	1.734723475976807E-18	305	MAP3K8	0.01712035610340695	305	MAP3K8	0.01712035610340695	0.0	305	PDE1A	0.01892863903085368	305	PDE1A	0.01892863903085368	0.0	305	GRB2	0.017482517482517484	305	GRB2	0.01748251748251748	3.469446951953614E-18
306	DCN	0.01567152483936687	306	DCN	0.01567152483936687	0.0	306	EEPD1	0.01722356183258698	306	EEPD1	0.017223561832586977	3.469446951953614E-18	306	HPD	0.015213753232922561	306	HPD	0.015213753232922563	1.734723475976807E-18	306	CCDC96	0.01712035610340695	306	CCDC96	0.01712035610340695	0.0	306	B3GNT5	0.01892863903085368	306	B3GNT5	0.01892863903085368	0.0	306	CCR6	0.017482517482517484	306	CCR6	0.01748251748251748	3.469446951953614E-18
307	GSDMA	0.01567152483936687	307	GSDMA	0.01567152483936687	0.0	307	SFTPB	0.01722356183258698	307	SFTPB	0.017223561832586977	3.469446951953614E-18	307	KLHL6	0.015213753232922561	307	KLHL6	0.015213753232922563	1.734723475976807E-18	307	MAP3K5	0.01712035610340695	307	MAP3K5	0.01712035610340695	0.0	307	MAPK13	0.01892863903085368	307	MAPK13	0.01892863903085368	0.0	307	SLC16A13	0.017482517482517484	307	SLC16A13	0.01748251748251748	3.469446951953614E-18
308	CACNA1C	0.01567152483936687	308	CACNA1C	0.01567152483936687	0.0	308	LRRC43	0.01722356183258698	308	LRRC43	0.017223561832586977	3.469446951953614E-18	308	OLR1	0.015213753232922561	308	OLR1	0.015213753232922563	1.734723475976807E-18	308	ZNF575	0.01712035610340695	308	ZNF575	0.01712035610340695	0.0	308	TMEM104	0.01892863903085368	308	TMEM104	0.01892863903085368	0.0	308	RASSF5	0.017482517482517484	308	RASSF5	0.01748251748251748	3.469446951953614E-18
309	PSD2	0.01567152483936687	309	PSD2	0.01567152483936687	0.0	309	IKBKE	0.01722356183258698	309	IKBKE	0.017223561832586977	3.469446951953614E-18	309	PTGS1	0.015213753232922561	309	PTGS1	0.015213753232922563	1.734723475976807E-18	309	GDPGP1	0.01712035610340695	309	GDPGP1	0.01712035610340695	0.0	309	NABP1	0.01892863903085368	309	NABP1	0.01892863903085368	0.0	309	IL1R2	0.017482517482517484	309	IL1R2	0.01748251748251748	3.469446951953614E-18
310	PTAFR	0.01567152483936687	310	PTAFR	0.01567152483936687	0.0	310	B3GNT5	0.01722356183258698	310	B3GNT5	0.017223561832586977	3.469446951953614E-18	310	FXYD3	0.015213753232922561	310	FXYD3	0.015213753232922563	1.734723475976807E-18	310	TPGS1	0.01712035610340695	310	TPGS1	0.01712035610340695	0.0	310	CCDC153	0.01892863903085368	310	CCDC153	0.01892863903085368	0.0	310	DNAJC22	0.017482517482517484	310	DNAJC22	0.01748251748251748	3.469446951953614E-18
311	ATP6V0D1	0.01567152483936687	311	ATP6V0D1	0.01567152483936687	0.0	311	NABP1	0.01722356183258698	311	NABP1	0.017223561832586977	3.469446951953614E-18	311	CCR2	0.015213753232922561	311	CCR2	0.015213753232922563	1.734723475976807E-18	311	IDH2	0.01712035610340695	311	IDH2	0.01712035610340695	0.0	311	DYNLT3	0.01892863903085368	311	DYNLT3	0.01892863903085368	0.0	311	LRRK1	0.017482517482517484	311	LRRK1	0.01748251748251748	3.469446951953614E-18
312	TRIM29	0.01567152483936687	312	TRIM29	0.01567152483936687	0.0	312	EDEM1	0.01722356183258698	312	EDEM1	0.017223561832586977	3.469446951953614E-18	312	FBP1	0.015213753232922561	312	FBP1	0.015213753232922563	1.734723475976807E-18	312	CTSE	0.01712035610340695	312	CTSE	0.01712035610340695	0.0	312	MAPKAPK2	0.01892863903085368	312	MAPKAPK2	0.01892863903085368	0.0	312	CAP1	0.017482517482517484	312	CAP1	0.01748251748251748	3.469446951953614E-18
313	SLC15A3	0.01567152483936687	313	SLC15A3	0.01567152483936687	0.0	313	SNAI3	0.01722356183258698	313	SNAI3	0.017223561832586977	3.469446951953614E-18	313	FAM71A	0.015213753232922561	313	FAM71A	0.015213753232922563	1.734723475976807E-18	313	TMEM109	0.01712035610340695	313	TMEM109	0.01712035610340695	0.0	313	RHD	0.01892863903085368	313	RHD	0.01892863903085368	0.0	313	IL4R	0.017482517482517484	313	IL4R	0.01748251748251748	3.469446951953614E-18
314	MASP1	0.01567152483936687	314	MASP1	0.01567152483936687	0.0	314	DYNLT3	0.01722356183258698	314	DYNLT3	0.017223561832586977	3.469446951953614E-18	314	SMAP2	0.015213753232922561	314	SMAP2	0.015213753232922563	1.734723475976807E-18	314	TRPS1	0.01712035610340695	314	TRPS1	0.01712035610340695	0.0	314	TNFAIP8L2	0.01892863903085368	314	TNFAIP8L2	0.01892863903085368	0.0	314	RHOC	0.017482517482517484	314	RHOC	0.01748251748251748	3.469446951953614E-18
315	DCDC2	0.01567152483936687	315	DCDC2	0.01567152483936687	0.0	315	TNFAIP8L2	0.01722356183258698	315	TNFAIP8L2	0.017223561832586977	3.469446951953614E-18	315	SLC39A11	0.015213753232922561	315	SLC39A11	0.015213753232922563	1.734723475976807E-18	315	TMEM102	0.01712035610340695	315	TMEM102	0.01712035610340695	0.0	315	TENM4	0.01892863903085368	315	TENM4	0.01892863903085368	0.0	315	ETHE1	0.017482517482517484	315	ETHE1	0.01748251748251748	3.469446951953614E-18
316	EPGN	0.01567152483936687	316	EPGN	0.01567152483936687	0.0	316	TNFAIP8L1	0.01722356183258698	316	TNFAIP8L1	0.017223561832586977	3.469446951953614E-18	316	SCN1B	0.015213753232922561	316	SCN1B	0.015213753232922563	1.734723475976807E-18	316	SMPDL3A	0.01712035610340695	316	SMPDL3A	0.01712035610340695	0.0	316	NCSTN	0.01892863903085368	316	NCSTN	0.01892863903085368	0.0	316	GREM2	0.017482517482517484	316	GREM2	0.01748251748251748	3.469446951953614E-18
317	C16orf71	0.01567152483936687	317	C16orf71	0.01567152483936687	0.0	317	TENM4	0.01722356183258698	317	TENM4	0.017223561832586977	3.469446951953614E-18	317	ARHGAP24	0.015213753232922561	317	ARHGAP24	0.015213753232922563	1.734723475976807E-18	317	SYK	0.01712035610340695	317	SYK	0.01712035610340695	0.0	317	TCP11L2	0.01892863903085368	317	TCP11L2	0.01892863903085368	0.0	317	FBXL15	0.017482517482517484	317	FBXL15	0.01748251748251748	3.469446951953614E-18
318	GAB3	0.01567152483936687	318	GAB3	0.01567152483936687	0.0	318	ADAMTSL5	0.01722356183258698	318	ADAMTSL5	0.017223561832586977	3.469446951953614E-18	318	ZSCAN20	0.015213753232922561	318	ZSCAN20	0.015213753232922563	1.734723475976807E-18	318	APOL3	0.01712035610340695	318	APOL3	0.01712035610340695	0.0	318	CEACAM5	0.01892863903085368	318	CEACAM5	0.01892863903085368	0.0	318	CYBA	0.017482517482517484	318	CYBA	0.01748251748251748	3.469446951953614E-18
319	ARHGAP6	0.01567152483936687	319	ARHGAP6	0.01567152483936687	0.0	319	TCP11L2	0.01722356183258698	319	TCP11L2	0.017223561832586977	3.469446951953614E-18	319	HHAT	0.015213753232922561	319	HHAT	0.015213753232922563	1.734723475976807E-18	319	ITPR2	0.01712035610340695	319	ITPR2	0.01712035610340695	0.0	319	CEACAM4	0.01892863903085368	319	CEACAM4	0.01892863903085368	0.0	319	HPGD	0.017482517482517484	319	HPGD	0.01748251748251748	3.469446951953614E-18
320	ARHGAP1	0.01567152483936687	320	ARHGAP1	0.01567152483936687	0.0	320	CEACAM4	0.01722356183258698	320	CEACAM4	0.017223561832586977	3.469446951953614E-18	320	CD22	0.015213753232922561	320	CD22	0.015213753232922563	1.734723475976807E-18	320	ZNF436	0.01712035610340695	320	ZNF436	0.01712035610340695	0.0	320	CEACAM7	0.01892863903085368	320	CEACAM7	0.01892863903085368	0.0	320	DCSTAMP	0.017482517482517484	320	DCSTAMP	0.01748251748251748	3.469446951953614E-18
321	PHACTR3	0.01567152483936687	321	PHACTR3	0.01567152483936687	0.0	321	LRRTM2	0.01722356183258698	321	LRRTM2	0.017223561832586977	3.469446951953614E-18	321	RBP4	0.015213753232922561	321	RBP4	0.015213753232922563	1.734723475976807E-18	321	TRAF3IP3	0.01712035610340695	321	TRAF3IP3	0.01712035610340695	0.0	321	ANGPT2	0.01892863903085368	321	ANGPT2	0.01892863903085368	0.0	321	FCER1G	0.017482517482517484	321	FCER1G	0.01748251748251748	3.469446951953614E-18
322	RNF135	0.01567152483936687	322	RNF135	0.01567152483936687	0.0	322	TLDC2	0.01722356183258698	322	TLDC2	0.017223561832586977	3.469446951953614E-18	322	SOCS3	0.015213753232922561	322	SOCS3	0.015213753232922563	1.734723475976807E-18	322	TIAM1	0.01712035610340695	322	TIAM1	0.01712035610340695	0.0	322	TLDC2	0.01892863903085368	322	TLDC2	0.01892863903085368	0.0	322	PTGDS	0.017482517482517484	322	PTGDS	0.01748251748251748	3.469446951953614E-18
323	ANXA13	0.01567152483936687	323	ANXA13	0.01567152483936687	0.0	323	PLEK2	0.01722356183258698	323	PLEK2	0.017223561832586977	3.469446951953614E-18	323	ACSL4	0.015213753232922561	323	ACSL4	0.015213753232922563	1.734723475976807E-18	323	LGALS9C	0.01712035610340695	323	LGALS9C	0.01712035610340695	0.0	323	PLEK2	0.01892863903085368	323	PLEK2	0.01892863903085368	0.0	323	RGL1	0.017482517482517484	323	RGL1	0.01748251748251748	3.469446951953614E-18
324	FJX1	0.01567152483936687	324	FJX1	0.01567152483936687	0.0	324	C1orf56	0.01722356183258698	324	C1orf56	0.017223561832586977	3.469446951953614E-18	324	GRB2	0.015213753232922561	324	GRB2	0.015213753232922563	1.734723475976807E-18	324	RNF144B	0.01712035610340695	324	RNF144B	0.01712035610340695	0.0	324	KRT75	0.01892863903085368	324	KRT75	0.01892863903085368	0.0	324	TACC1	0.017482517482517484	324	TACC1	0.01748251748251748	3.469446951953614E-18
325	TSHZ2	0.01567152483936687	325	TSHZ2	0.01567152483936687	0.0	325	HIPK2	0.01722356183258698	325	HIPK2	0.017223561832586977	3.469446951953614E-18	325	PSG8	0.015213753232922561	325	PSG8	0.015213753232922563	1.734723475976807E-18	325	CARD6	0.01712035610340695	325	CARD6	0.01712035610340695	0.0	325	KRT77	0.01892863903085368	325	KRT77	0.01892863903085368	0.0	325	TMEM238	0.017482517482517484	325	TMEM238	0.01748251748251748	3.469446951953614E-18
326	TIPARP	0.01567152483936687	326	TIPARP	0.01567152483936687	0.0	326	PSMB10	0.01722356183258698	326	PSMB10	0.017223561832586977	3.469446951953614E-18	326	PSG9	0.015213753232922561	326	PSG9	0.015213753232922563	1.734723475976807E-18	326	FOS	0.01712035610340695	326	FOS	0.01712035610340695	0.0	326	PSMB10	0.01892863903085368	326	PSMB10	0.01892863903085368	0.0	326	KIAA0513	0.017482517482517484	326	KIAA0513	0.01748251748251748	3.469446951953614E-18
327	CYB561D1	0.01567152483936687	327	CYB561D1	0.01567152483936687	0.0	327	SASH3	0.01722356183258698	327	SASH3	0.017223561832586977	3.469446951953614E-18	327	PSG6	0.015213753232922561	327	PSG6	0.015213753232922563	1.734723475976807E-18	327	UBA7	0.01712035610340695	327	UBA7	0.01712035610340695	0.0	327	KRT79	0.01892863903085368	327	KRT79	0.01892863903085368	0.0	327	HIVEP3	0.017482517482517484	327	HIVEP3	0.01748251748251748	3.469446951953614E-18
328	NNMT	0.01567152483936687	328	NNMT	0.01567152483936687	0.0	328	CFLAR	0.01722356183258698	328	CFLAR	0.017223561832586977	3.469446951953614E-18	328	PSG4	0.015213753232922561	328	PSG4	0.015213753232922563	1.734723475976807E-18	328	BTBD19	0.01712035610340695	328	BTBD19	0.01712035610340695	0.0	328	TIGD3	0.01892863903085368	328	TIGD3	0.01892863903085368	0.0	328	P2RX1	0.017482517482517484	328	P2RX1	0.01748251748251748	3.469446951953614E-18
329	EIF4EBP3	0.01567152483936687	329	EIF4EBP3	0.01567152483936687	0.0	329	PATL2	0.01722356183258698	329	PATL2	0.017223561832586977	3.469446951953614E-18	329	PSG2	0.015213753232922561	329	PSG2	0.015213753232922563	1.734723475976807E-18	329	COTL1	0.01712035610340695	329	COTL1	0.01712035610340695	0.0	329	HAAO	0.01892863903085368	329	HAAO	0.01892863903085368	0.0	329	KCNK6	0.017482517482517484	329	KCNK6	0.01748251748251748	3.469446951953614E-18
330	GRK4	0.01567152483936687	330	GRK4	0.01567152483936687	0.0	330	DMXL2	0.01722356183258698	330	DMXL2	0.017223561832586977	3.469446951953614E-18	330	RASSF5	0.015213753232922561	330	RASSF5	0.015213753232922563	1.734723475976807E-18	330	TMCC3	0.01712035610340695	330	TMCC3	0.01712035610340695	0.0	330	SSUH2	0.01892863903085368	330	SSUH2	0.01892863903085368	0.0	330	HSD11B1	0.017482517482517484	330	HSD11B1	0.01748251748251748	3.469446951953614E-18
331	BAG3	0.01567152483936687	331	BAG3	0.01567152483936687	0.0	331	ELMOD3	0.01722356183258698	331	ELMOD3	0.017223561832586977	3.469446951953614E-18	331	KREMEN1	0.015213753232922561	331	KREMEN1	0.015213753232922563	1.734723475976807E-18	331	EPB41L3	0.01712035610340695	331	EPB41L3	0.01712035610340695	0.0	331	ALPK2	0.01892863903085368	331	ALPK2	0.01892863903085368	0.0	331	RMDN2	0.017482517482517484	331	RMDN2	0.01748251748251748	3.469446951953614E-18
332	MSRB3	0.01567152483936687	332	MSRB3	0.01567152483936687	0.0	332	SLC22A18	0.01722356183258698	332	SLC22A18	0.017223561832586977	3.469446951953614E-18	332	IL1R2	0.015213753232922561	332	IL1R2	0.015213753232922563	1.734723475976807E-18	332	IL7R	0.01712035610340695	332	IL7R	0.01712035610340695	0.0	332	S1PR1	0.01892863903085368	332	S1PR1	0.01892863903085368	0.0	332	TNFSF8	0.017482517482517484	332	TNFSF8	0.01748251748251748	3.469446951953614E-18
333	CHMP3	0.01567152483936687	333	CHMP3	0.01567152483936687	0.0	333	ACOX1	0.01722356183258698	333	ACOX1	0.017223561832586977	3.469446951953614E-18	333	LRRK1	0.015213753232922561	333	LRRK1	0.015213753232922563	1.734723475976807E-18	333	CREBL2	0.01712035610340695	333	CREBL2	0.01712035610340695	0.0	333	SASH3	0.01892863903085368	333	SASH3	0.01892863903085368	0.0	333	EVI2B	0.017482517482517484	333	EVI2B	0.01748251748251748	3.469446951953614E-18
334	ADAMTS18	0.01567152483936687	334	ADAMTS18	0.01567152483936687	0.0	334	CFD	0.01722356183258698	334	CFD	0.017223561832586977	3.469446951953614E-18	334	IL4R	0.015213753232922561	334	IL4R	0.015213753232922563	1.734723475976807E-18	334	GPR65	0.01712035610340695	334	GPR65	0.01712035610340695	0.0	334	CFLAR	0.01892863903085368	334	CFLAR	0.01892863903085368	0.0	334	IL6ST	0.017482517482517484	334	IL6ST	0.01748251748251748	3.469446951953614E-18
335	DENND3	0.01567152483936687	335	DENND3	0.01567152483936687	0.0	335	TMEM169	0.01722356183258698	335	TMEM169	0.017223561832586977	3.469446951953614E-18	335	CAPS	0.015213753232922561	335	CAPS	0.015213753232922563	1.734723475976807E-18	335	UAP1L1	0.01712035610340695	335	UAP1L1	0.01712035610340695	0.0	335	PATL2	0.01892863903085368	335	PATL2	0.01892863903085368	0.0	335	COMMD9	0.017482517482517484	335	COMMD9	0.01748251748251748	3.469446951953614E-18
336	DEF6	0.01567152483936687	336	DEF6	0.01567152483936687	0.0	336	ACCS	0.01722356183258698	336	ACCS	0.017223561832586977	3.469446951953614E-18	336	RHOC	0.015213753232922561	336	RHOC	0.015213753232922563	1.734723475976807E-18	336	FRMD4A	0.01712035610340695	336	FRMD4A	0.01712035610340695	0.0	336	FRY	0.01892863903085368	336	FRY	0.01892863903085368	0.0	336	PTGER4	0.017482517482517484	336	PTGER4	0.01748251748251748	3.469446951953614E-18
337	C9	0.01567152483936687	337	C9	0.01567152483936687	0.0	337	FUT7	0.01722356183258698	337	FUT7	0.017223561832586977	3.469446951953614E-18	337	PTGES	0.015213753232922561	337	PTGES	0.015213753232922563	1.734723475976807E-18	337	SH3BGRL3	0.01712035610340695	337	SH3BGRL3	0.01712035610340695	0.0	337	SLC22A18	0.01892863903085368	337	SLC22A18	0.01892863903085368	0.0	337	LMBRD2	0.017482517482517484	337	LMBRD2	0.01748251748251748	3.469446951953614E-18
338	SLC6A12	0.01567152483936687	338	SLC6A12	0.01567152483936687	0.0	338	IL18RAP	0.01722356183258698	338	IL18RAP	0.017223561832586977	3.469446951953614E-18	338	ETHE1	0.015213753232922561	338	ETHE1	0.015213753232922563	1.734723475976807E-18	338	IL10	0.01712035610340695	338	IL10	0.01712035610340695	0.0	338	ACOX1	0.01892863903085368	338	ACOX1	0.01892863903085368	0.0	338	B3GALT4	0.017482517482517484	338	B3GALT4	0.01748251748251748	3.469446951953614E-18
339	ARHGAP25	0.01567152483936687	339	ARHGAP25	0.01567152483936687	0.0	339	SUN2	0.01722356183258698	339	SUN2	0.017223561832586977	3.469446951953614E-18	339	PSG5	0.015213753232922561	339	PSG5	0.015213753232922563	1.734723475976807E-18	339	GSTM2	0.01712035610340695	339	GSTM2	0.01712035610340695	0.0	339	LPAR3	0.01892863903085368	339	LPAR3	0.01892863903085368	0.0	339	SLC38A6	0.017482517482517484	339	SLC38A6	0.01748251748251748	3.469446951953614E-18
340	GALC	0.01567152483936687	340	GALC	0.01567152483936687	0.0	340	ADCK5	0.01722356183258698	340	ADCK5	0.017223561832586977	3.469446951953614E-18	340	ABCG8	0.015213753232922561	340	ABCG8	0.015213753232922563	1.734723475976807E-18	340	GSTM4	0.01712035610340695	340	GSTM4	0.01712035610340695	0.0	340	CYP17A1	0.01892863903085368	340	CYP17A1	0.01892863903085368	0.0	340	B3GALT2	0.017482517482517484	340	B3GALT2	0.01748251748251748	3.469446951953614E-18
341	GALM	0.01567152483936687	341	GALM	0.01567152483936687	0.0	341	ADCK2	0.01722356183258698	341	ADCK2	0.017223561832586977	3.469446951953614E-18	341	FBXL15	0.015213753232922561	341	FBXL15	0.015213753232922563	1.734723475976807E-18	341	MAEL	0.01712035610340695	341	MAEL	0.01712035610340695	0.0	341	ALOX15	0.01892863903085368	341	ALOX15	0.01892863903085368	0.0	341	GRAMD4	0.017482517482517484	341	GRAMD4	0.01748251748251748	3.469446951953614E-18
342	LGALS1	0.01567152483936687	342	LGALS1	0.01567152483936687	0.0	342	SLFN11	0.01722356183258698	342	SLFN11	0.017223561832586977	3.469446951953614E-18	342	CYBA	0.015213753232922561	342	CYBA	0.015213753232922563	1.734723475976807E-18	342	IL16	0.01712035610340695	342	IL16	0.01712035610340695	0.0	342	ELAC1	0.01892863903085368	342	ELAC1	0.01892863903085368	0.0	342	CRTAM	0.017482517482517484	342	CRTAM	0.01748251748251748	3.469446951953614E-18
343	KCNJ1	0.01567152483936687	343	KCNJ1	0.01567152483936687	0.0	343	CES1	0.01722356183258698	343	CES1	0.017223561832586977	3.469446951953614E-18	343	BATF2	0.015213753232922561	343	BATF2	0.015213753232922563	1.734723475976807E-18	343	TREML2	0.01712035610340695	343	TREML2	0.01712035610340695	0.0	343	ADCK2	0.01892863903085368	343	ADCK2	0.01892863903085368	0.0	343	MTUS1	0.017482517482517484	343	MTUS1	0.01748251748251748	3.469446951953614E-18
344	MYL12A	0.01567152483936687	344	MYL12A	0.01567152483936687	0.0	344	FFAR2	0.01722356183258698	344	FFAR2	0.017223561832586977	3.469446951953614E-18	344	HPGD	0.015213753232922561	344	HPGD	0.015213753232922563	1.734723475976807E-18	344	STX12	0.01712035610340695	344	STX12	0.01712035610340695	0.0	344	PRKCE	0.01892863903085368	344	PRKCE	0.01892863903085368	0.0	344	APBA1	0.017482517482517484	344	APBA1	0.01748251748251748	3.469446951953614E-18
345	TAPBP	0.01567152483936687	345	TAPBP	0.01567152483936687	0.0	345	CKLF-CMTM1	0.01722356183258698	345	CKLF-CMTM1	0.017223561832586977	3.469446951953614E-18	345	DCSTAMP	0.015213753232922561	345	DCSTAMP	0.015213753232922563	1.734723475976807E-18	345	ZMIZ1	0.01712035610340695	345	ZMIZ1	0.01712035610340695	0.0	345	C15orf61	0.01892863903085368	345	C15orf61	0.01892863903085368	0.0	345	FBXO15	0.017482517482517484	345	FBXO15	0.01748251748251748	3.469446951953614E-18
346	VMO1	0.01567152483936687	346	VMO1	0.01567152483936687	0.0	346	ITPR1	0.01722356183258698	346	ITPR1	0.017223561832586977	3.469446951953614E-18	346	FCER1G	0.015213753232922561	346	FCER1G	0.015213753232922563	1.734723475976807E-18	346	COLGALT2	0.01712035610340695	346	COLGALT2	0.01712035610340695	0.0	346	FFAR2	0.01892863903085368	346	FFAR2	0.01892863903085368	0.0	346	CXCL16	0.017482517482517484	346	CXCL16	0.01748251748251748	3.469446951953614E-18
347	AGPAT2	0.01567152483936687	347	AGPAT2	0.01567152483936687	0.0	347	FUT8	0.01722356183258698	347	FUT8	0.017223561832586977	3.469446951953614E-18	347	PTGDS	0.015213753232922561	347	PTGDS	0.015213753232922563	1.734723475976807E-18	347	LIPA	0.01712035610340695	347	LIPA	0.01712035610340695	0.0	347	GPER1	0.01892863903085368	347	GPER1	0.01892863903085368	0.0	347	AKAP6	0.017482517482517484	347	AKAP6	0.01748251748251748	3.469446951953614E-18
348	PHC2	0.01567152483936687	348	PHC2	0.01567152483936687	0.0	348	MYZAP	0.01722356183258698	348	MYZAP	0.017223561832586977	3.469446951953614E-18	348	RGL1	0.015213753232922561	348	RGL1	0.015213753232922563	1.734723475976807E-18	348	CD6	0.01712035610340695	348	CD6	0.01712035610340695	0.0	348	MAP3K8	0.01892863903085368	348	MAP3K8	0.01892863903085368	0.0	348	DBNL	0.017482517482517484	348	DBNL	0.01748251748251748	3.469446951953614E-18
349	PLAUR	0.01567152483936687	349	PLAUR	0.01567152483936687	0.0	349	MAP3K8	0.01722356183258698	349	MAP3K8	0.017223561832586977	3.469446951953614E-18	349	TACC1	0.015213753232922561	349	TACC1	0.015213753232922563	1.734723475976807E-18	349	GNAT2	0.01712035610340695	349	GNAT2	0.01712035610340695	0.0	349	HAMP	0.01892863903085368	349	HAMP	0.01892863903085368	0.0	349	FAM20C	0.017482517482517484	349	FAM20C	0.01748251748251748	3.469446951953614E-18
350	ECM2	0.01567152483936687	350	ECM2	0.01567152483936687	0.0	350	HAMP	0.01722356183258698	350	HAMP	0.017223561832586977	3.469446951953614E-18	350	TMEM235	0.015213753232922561	350	TMEM235	0.015213753232922563	1.734723475976807E-18	350	TNFSF12-TNFSF13	0.01712035610340695	350	TNFSF12-TNFSF13	0.01712035610340695	0.0	350	CCDC96	0.01892863903085368	350	CCDC96	0.01892863903085368	0.0	350	CD1C	0.017482517482517484	350	CD1C	0.01748251748251748	3.469446951953614E-18
351	TMEM156	0.01567152483936687	351	TMEM156	0.01567152483936687	0.0	351	CCDC96	0.01722356183258698	351	CCDC96	0.017223561832586977	3.469446951953614E-18	351	KIAA0513	0.015213753232922561	351	KIAA0513	0.015213753232922563	1.734723475976807E-18	351	P2RX4	0.01712035610340695	351	P2RX4	0.01712035610340695	0.0	351	MAP3K5	0.01892863903085368	351	MAP3K5	0.01892863903085368	0.0	351	ARHGAP9	0.017482517482517484	351	ARHGAP9	0.01748251748251748	3.469446951953614E-18
352	TMEM158	0.01567152483936687	352	TMEM158	0.01567152483936687	0.0	352	MAP3K5	0.01722356183258698	352	MAP3K5	0.017223561832586977	3.469446951953614E-18	352	HIVEP3	0.015213753232922561	352	HIVEP3	0.015213753232922563	1.734723475976807E-18	352	DPP9	0.01712035610340695	352	DPP9	0.01712035610340695	0.0	352	ZNF575	0.01892863903085368	352	ZNF575	0.01892863903085368	0.0	352	GPR137B	0.017482517482517484	352	GPR137B	0.01748251748251748	3.469446951953614E-18
353	ALDH1A1	0.01567152483936687	353	ALDH1A1	0.01567152483936687	0.0	353	NSG2	0.01722356183258698	353	NSG2	0.017223561832586977	3.469446951953614E-18	353	CLEC4D	0.015213753232922561	353	CLEC4D	0.015213753232922563	1.734723475976807E-18	353	ANXA5	0.01712035610340695	353	ANXA5	0.01712035610340695	0.0	353	GDPGP1	0.01892863903085368	353	GDPGP1	0.01892863903085368	0.0	353	CHIC2	0.017482517482517484	353	CHIC2	0.01748251748251748	3.469446951953614E-18
354	LRRC29	0.01567152483936687	354	LRRC29	0.01567152483936687	0.0	354	ZNF575	0.01722356183258698	354	ZNF575	0.017223561832586977	3.469446951953614E-18	354	P2RX1	0.015213753232922561	354	P2RX1	0.015213753232922563	1.734723475976807E-18	354	ANXA4	0.01712035610340695	354	ANXA4	0.01712035610340695	0.0	354	TPGS1	0.01892863903085368	354	TPGS1	0.01892863903085368	0.0	354	WDR47	0.017482517482517484	354	WDR47	0.01748251748251748	3.469446951953614E-18
355	ALDH1A3	0.01567152483936687	355	ALDH1A3	0.01567152483936687	0.0	355	GDPGP1	0.01722356183258698	355	GDPGP1	0.017223561832586977	3.469446951953614E-18	355	CORO7	0.015213753232922561	355	CORO7	0.015213753232922563	1.734723475976807E-18	355	GPD1L	0.01712035610340695	355	GPD1L	0.01712035610340695	0.0	355	CTSK	0.01892863903085368	355	CTSK	0.01892863903085368	0.0	355	TNFRSF9	0.017482517482517484	355	TNFRSF9	0.01748251748251748	3.469446951953614E-18
356	RAB3IL1	0.01567152483936687	356	RAB3IL1	0.01567152483936687	0.0	356	TPGS1	0.01722356183258698	356	TPGS1	0.017223561832586977	3.469446951953614E-18	356	BCL2L14	0.015213753232922561	356	BCL2L14	0.015213753232922563	1.734723475976807E-18	356	SIDT2	0.01712035610340695	356	SIDT2	0.01712035610340695	0.0	356	IDH2	0.01892863903085368	356	IDH2	0.01892863903085368	0.0	356	DIO3	0.017482517482517484	356	DIO3	0.01748251748251748	3.469446951953614E-18
357	PRICKLE2	0.01567152483936687	357	PRICKLE2	0.01567152483936687	0.0	357	CTSE	0.01722356183258698	357	CTSE	0.017223561832586977	3.469446951953614E-18	357	NACC2	0.015213753232922561	357	NACC2	0.015213753232922563	1.734723475976807E-18	357	SAMHD1	0.01712035610340695	357	SAMHD1	0.01712035610340695	0.0	357	CTSE	0.01892863903085368	357	CTSE	0.01892863903085368	0.0	357	CCL23	0.017482517482517484	357	CCL23	0.01748251748251748	3.469446951953614E-18
358	GCNT3	0.01567152483936687	358	GCNT3	0.01567152483936687	0.0	358	TMEM109	0.01722356183258698	358	TMEM109	0.017223561832586977	3.469446951953614E-18	358	VPS13C	0.015213753232922561	358	VPS13C	0.015213753232922563	1.734723475976807E-18	358	RNFT1	0.01712035610340695	358	RNFT1	0.01712035610340695	0.0	358	SMPDL3A	0.01892863903085368	358	SMPDL3A	0.01892863903085368	0.0	358	TBC1D2B	0.017482517482517484	358	TBC1D2B	0.01748251748251748	3.469446951953614E-18
359	SLC48A1	0.01567152483936687	359	SLC48A1	0.01567152483936687	0.0	359	TRPS1	0.01722356183258698	359	TRPS1	0.017223561832586977	3.469446951953614E-18	359	HSD11B1	0.015213753232922561	359	HSD11B1	0.015213753232922563	1.734723475976807E-18	359	WNT9B	0.01712035610340695	359	WNT9B	0.01712035610340695	0.0	359	SYK	0.01892863903085368	359	SYK	0.01892863903085368	0.0	359	TMEM91	0.017482517482517484	359	TMEM91	0.01748251748251748	3.469446951953614E-18
360	SLC16A11	0.01567152483936687	360	SLC16A11	0.01567152483936687	0.0	360	TMEM102	0.01722356183258698	360	TMEM102	0.017223561832586977	3.469446951953614E-18	360	RMDN2	0.015213753232922561	360	RMDN2	0.015213753232922563	1.734723475976807E-18	360	MCF2L2	0.01712035610340695	360	MCF2L2	0.01712035610340695	0.0	360	INPP5K	0.01892863903085368	360	INPP5K	0.01892863903085368	0.0	360	MGLL	0.017482517482517484	360	MGLL	0.01748251748251748	3.469446951953614E-18
361	RGS1	0.01567152483936687	361	RGS1	0.01567152483936687	0.0	361	SMPDL3A	0.01722356183258698	361	SMPDL3A	0.017223561832586977	3.469446951953614E-18	361	TMEM164	0.015213753232922561	361	TMEM164	0.015213753232922563	1.734723475976807E-18	361	SELPLG	0.01712035610340695	361	SELPLG	0.01712035610340695	0.0	361	KRT2	0.01892863903085368	361	KRT2	0.01892863903085368	0.0	361	PPARD	0.017482517482517484	361	PPARD	0.01748251748251748	3.469446951953614E-18
362	SIRPB2	0.01567152483936687	362	SIRPB2	0.01567152483936687	0.0	362	SYK	0.01722356183258698	362	SYK	0.017223561832586977	3.469446951953614E-18	362	TNFSF8	0.015213753232922561	362	TNFSF8	0.015213753232922563	1.734723475976807E-18	362	DENND2D	0.01712035610340695	362	DENND2D	0.01712035610340695	0.0	362	APOL3	0.01892863903085368	362	APOL3	0.01892863903085368	0.0	362	ARPC5	0.017482517482517484	362	ARPC5	0.01748251748251748	3.469446951953614E-18
363	CYP1B1	0.01567152483936687	363	CYP1B1	0.01567152483936687	0.0	363	APOL3	0.01722356183258698	363	APOL3	0.017223561832586977	3.469446951953614E-18	363	EVI2B	0.015213753232922561	363	EVI2B	0.015213753232922563	1.734723475976807E-18	363	ADGB	0.01712035610340695	363	ADGB	0.01712035610340695	0.0	363	ITPR2	0.01892863903085368	363	ITPR2	0.01892863903085368	0.0	363	CYSTM1	0.017482517482517484	363	CYSTM1	0.01748251748251748	3.469446951953614E-18
364	CALCRL	0.01567152483936687	364	CALCRL	0.01567152483936687	0.0	364	ITPR2	0.01722356183258698	364	ITPR2	0.017223561832586977	3.469446951953614E-18	364	CACNG2	0.015213753232922561	364	CACNG2	0.015213753232922563	1.734723475976807E-18	364	RNASEK	0.01712035610340695	364	RNASEK	0.01712035610340695	0.0	364	ZNF436	0.01892863903085368	364	ZNF436	0.01892863903085368	0.0	364	GSTO1	0.017482517482517484	364	GSTO1	0.01748251748251748	3.469446951953614E-18
365	PIGH	0.01567152483936687	365	PIGH	0.01567152483936687	0.0	365	ZNF436	0.01722356183258698	365	ZNF436	0.017223561832586977	3.469446951953614E-18	365	FOXN2	0.015213753232922561	365	FOXN2	0.015213753232922563	1.734723475976807E-18	365	RNASEL	0.01712035610340695	365	RNASEL	0.01712035610340695	0.0	365	TEKT1	0.01892863903085368	365	TEKT1	0.01892863903085368	0.0	365	CD14	0.017482517482517484	365	CD14	0.01748251748251748	3.469446951953614E-18
366	SIRPB1	0.01567152483936687	366	SIRPB1	0.01567152483936687	0.0	366	TRAF3IP3	0.01722356183258698	366	TRAF3IP3	0.017223561832586977	3.469446951953614E-18	366	IL6ST	0.015213753232922561	366	IL6ST	0.015213753232922563	1.734723475976807E-18	366	RNASE4	0.01712035610340695	366	RNASE4	0.01712035610340695	0.0	366	VPS37C	0.01892863903085368	366	VPS37C	0.01892863903085368	0.0	366	MPP1	0.017482517482517484	366	MPP1	0.01748251748251748	3.469446951953614E-18
367	PIGR	0.01567152483936687	367	PIGR	0.01567152483936687	0.0	367	TIAM1	0.01722356183258698	367	TIAM1	0.017223561832586977	3.469446951953614E-18	367	KIAA0319	0.015213753232922561	367	KIAA0319	0.015213753232922563	1.734723475976807E-18	367	LY9	0.01712035610340695	367	LY9	0.01712035610340695	0.0	367	LGALS9C	0.01892863903085368	367	LGALS9C	0.01892863903085368	0.0	367	RAP1B	0.017482517482517484	367	RAP1B	0.01748251748251748	3.469446951953614E-18
368	KLHL6	0.01567152483936687	368	KLHL6	0.01567152483936687	0.0	368	LGALS9C	0.01722356183258698	368	LGALS9C	0.017223561832586977	3.469446951953614E-18	368	COMMD9	0.015213753232922561	368	COMMD9	0.015213753232922563	1.734723475976807E-18	368	LYN	0.01712035610340695	368	LYN	0.01712035610340695	0.0	368	RNF144B	0.01892863903085368	368	RNF144B	0.01892863903085368	0.0	368	RAP1A	0.017482517482517484	368	RAP1A	0.01748251748251748	3.469446951953614E-18
369	OLR1	0.01567152483936687	369	OLR1	0.01567152483936687	0.0	369	RNF144B	0.01722356183258698	369	RNF144B	0.017223561832586977	3.469446951953614E-18	369	PTGER4	0.015213753232922561	369	PTGER4	0.015213753232922563	1.734723475976807E-18	369	FBXL8	0.01712035610340695	369	FBXL8	0.01712035610340695	0.0	369	CARD6	0.01892863903085368	369	CARD6	0.01892863903085368	0.0	369	TRIM47	0.017482517482517484	369	TRIM47	0.01748251748251748	3.469446951953614E-18
370	TPPP	0.01567152483936687	370	TPPP	0.01567152483936687	0.0	370	CARD6	0.01722356183258698	370	CARD6	0.017223561832586977	3.469446951953614E-18	370	LMBRD2	0.015213753232922561	370	LMBRD2	0.015213753232922563	1.734723475976807E-18	370	KIAA0930	0.01712035610340695	370	KIAA0930	0.01712035610340695	0.0	370	UBA7	0.01892863903085368	370	UBA7	0.01892863903085368	0.0	370	AKR7A2	0.017482517482517484	370	AKR7A2	0.01748251748251748	3.469446951953614E-18
371	WBP2	0.01567152483936687	371	WBP2	0.01567152483936687	0.0	371	FOS	0.01722356183258698	371	FOS	0.017223561832586977	3.469446951953614E-18	371	B3GALT4	0.015213753232922561	371	B3GALT4	0.015213753232922563	1.734723475976807E-18	371	DOK1	0.01712035610340695	371	DOK1	0.01712035610340695	0.0	371	ADAMTS9	0.01892863903085368	371	ADAMTS9	0.01892863903085368	0.0	371	FAM110A	0.017482517482517484	371	FAM110A	0.01748251748251748	3.469446951953614E-18
372	COL6A3	0.01567152483936687	372	COL6A3	0.01567152483936687	0.0	372	UBA7	0.01722356183258698	372	UBA7	0.017223561832586977	3.469446951953614E-18	372	SLC38A6	0.015213753232922561	372	SLC38A6	0.015213753232922563	1.734723475976807E-18	372	ZADH2	0.01712035610340695	372	ZADH2	0.01712035610340695	0.0	372	BTBD19	0.01892863903085368	372	BTBD19	0.01892863903085368	0.0	372	CAPG	0.017482517482517484	372	CAPG	0.01748251748251748	3.469446951953614E-18
373	DOLK	0.01567152483936687	373	DOLK	0.01567152483936687	0.0	373	BTBD19	0.01722356183258698	373	BTBD19	0.017223561832586977	3.469446951953614E-18	373	B3GALT2	0.015213753232922561	373	B3GALT2	0.015213753232922563	1.734723475976807E-18	373	ADAMDEC1	0.01712035610340695	373	ADAMDEC1	0.01712035610340695	0.0	373	KRT5	0.01892863903085368	373	KRT5	0.01892863903085368	0.0	373	ACKR3	0.017482517482517484	373	ACKR3	0.01748251748251748	3.469446951953614E-18
374	PTGS1	0.01567152483936687	374	PTGS1	0.01567152483936687	0.0	374	COTL1	0.01722356183258698	374	COTL1	0.017223561832586977	3.469446951953614E-18	374	CRTAM	0.015213753232922561	374	CRTAM	0.015213753232922563	1.734723475976807E-18	374	TLR6	0.01712035610340695	374	TLR6	0.01712035610340695	0.0	374	TMCC3	0.01892863903085368	374	TMCC3	0.01892863903085368	0.0	374	ATOH8	0.017482517482517484	374	ATOH8	0.01748251748251748	3.469446951953614E-18
375	SMAP2	0.01567152483936687	375	SMAP2	0.01567152483936687	0.0	375	TMCC3	0.01722356183258698	375	TMCC3	0.017223561832586977	3.469446951953614E-18	375	MTUS1	0.015213753232922561	375	MTUS1	0.015213753232922563	1.734723475976807E-18	375	NFKBIA	0.01712035610340695	375	NFKBIA	0.01712035610340695	0.0	375	KRT6B	0.01892863903085368	375	KRT6B	0.01892863903085368	0.0	375	ADCY10	0.017482517482517484	375	ADCY10	0.01748251748251748	3.469446951953614E-18
376	NALCN	0.01567152483936687	376	NALCN	0.01567152483936687	0.0	376	EPB41L3	0.01722356183258698	376	EPB41L3	0.017223561832586977	3.469446951953614E-18	376	APBA1	0.015213753232922561	376	APBA1	0.015213753232922563	1.734723475976807E-18	376	CYTIP	0.01712035610340695	376	CYTIP	0.01712035610340695	0.0	376	KRT6C	0.01892863903085368	376	KRT6C	0.01892863903085368	0.0	376	MPG	0.017482517482517484	376	MPG	0.01748251748251748	3.469446951953614E-18
377	SCN1B	0.01567152483936687	377	SCN1B	0.01567152483936687	0.0	377	IL7R	0.01722356183258698	377	IL7R	0.017223561832586977	3.469446951953614E-18	377	FBXO15	0.015213753232922561	377	FBXO15	0.015213753232922563	1.734723475976807E-18	377	DPEP2	0.01712035610340695	377	DPEP2	0.01712035610340695	0.0	377	KRT6A	0.01892863903085368	377	KRT6A	0.01892863903085368	0.0	377	PRB2	0.017482517482517484	377	PRB2	0.01748251748251748	3.469446951953614E-18
378	NTRK1	0.01567152483936687	378	NTRK1	0.01567152483936687	0.0	378	CREBL2	0.01722356183258698	378	CREBL2	0.017223561832586977	3.469446951953614E-18	378	CXCL16	0.015213753232922561	378	CXCL16	0.015213753232922563	1.734723475976807E-18	378	PLEKHA7	0.01712035610340695	378	PLEKHA7	0.01712035610340695	0.0	378	EPB41L3	0.01892863903085368	378	EPB41L3	0.01892863903085368	0.0	378	ABCG2	0.017482517482517484	378	ABCG2	0.01748251748251748	3.469446951953614E-18
379	ARHGAP24	0.01567152483936687	379	ARHGAP24	0.01567152483936687	0.0	379	GPR65	0.01722356183258698	379	GPR65	0.017223561832586977	3.469446951953614E-18	379	DBNL	0.015213753232922561	379	DBNL	0.015213753232922563	1.734723475976807E-18	379	CD44	0.01712035610340695	379	CD44	0.01712035610340695	0.0	379	IL7R	0.01892863903085368	379	IL7R	0.01892863903085368	0.0	379	SORT1	0.017482517482517484	379	SORT1	0.01748251748251748	3.469446951953614E-18
380	HHAT	0.01567152483936687	380	HHAT	0.01567152483936687	0.0	380	UAP1L1	0.01722356183258698	380	UAP1L1	0.017223561832586977	3.469446951953614E-18	380	FAM20C	0.015213753232922561	380	FAM20C	0.015213753232922563	1.734723475976807E-18	380	IFI6	0.01712035610340695	380	IFI6	0.01712035610340695	0.0	380	GPR65	0.01892863903085368	380	GPR65	0.01892863903085368	0.0	380	ANKRD22	0.017482517482517484	380	ANKRD22	0.01748251748251748	3.469446951953614E-18
381	CD22	0.01567152483936687	381	CD22	0.01567152483936687	0.0	381	FRMD4A	0.01722356183258698	381	FRMD4A	0.017223561832586977	3.469446951953614E-18	381	CD1C	0.015213753232922561	381	CD1C	0.015213753232922563	1.734723475976807E-18	381	PIK3R5	0.01712035610340695	381	PIK3R5	0.01712035610340695	0.0	381	GLCE	0.01892863903085368	381	GLCE	0.01892863903085368	0.0	381	NPNT	0.017482517482517484	381	NPNT	0.01748251748251748	3.469446951953614E-18
382	RBP4	0.01567152483936687	382	RBP4	0.01567152483936687	0.0	382	IL10	0.01722356183258698	382	IL10	0.017223561832586977	3.469446951953614E-18	382	ARHGAP9	0.015213753232922561	382	ARHGAP9	0.015213753232922563	1.734723475976807E-18	382	CD300A	0.01712035610340695	382	CD300A	0.01712035610340695	0.0	382	FRMD4A	0.01892863903085368	382	FRMD4A	0.01892863903085368	0.0	382	SLFN12L	0.017482517482517484	382	SLFN12L	0.01748251748251748	3.469446951953614E-18
383	GPR1	0.01567152483936687	383	GPR1	0.01567152483936687	0.0	383	GSTM2	0.01722356183258698	383	GSTM2	0.017223561832586977	3.469446951953614E-18	383	GPR137B	0.015213753232922561	383	GPR137B	0.015213753232922563	1.734723475976807E-18	383	TNFAIP3	0.01712035610340695	383	TNFAIP3	0.01712035610340695	0.0	383	RAB9B	0.01892863903085368	383	RAB9B	0.01892863903085368	0.0	383	NCKAP1L	0.017482517482517484	383	NCKAP1L	0.01748251748251748	3.469446951953614E-18
384	ACYP2	0.01567152483936687	384	ACYP2	0.01567152483936687	0.0	384	GSTM4	0.01722356183258698	384	GSTM4	0.017223561832586977	3.469446951953614E-18	384	CHIC2	0.015213753232922561	384	CHIC2	0.015213753232922563	1.734723475976807E-18	384	ELOVL1	0.01712035610340695	384	ELOVL1	0.01712035610340695	0.0	384	SH3BGRL3	0.01892863903085368	384	SH3BGRL3	0.01892863903085368	0.0	384	DOCK2	0.017482517482517484	384	DOCK2	0.01748251748251748	3.469446951953614E-18
385	GRB2	0.01567152483936687	385	GRB2	0.01567152483936687	0.0	385	MAEL	0.01722356183258698	385	MAEL	0.017223561832586977	3.469446951953614E-18	385	WDR47	0.015213753232922561	385	WDR47	0.015213753232922563	1.734723475976807E-18	385	BAIAP2	0.01712035610340695	385	BAIAP2	0.01712035610340695	0.0	385	IL10	0.01892863903085368	385	IL10	0.01892863903085368	0.0	385	LPCAT2	0.017482517482517484	385	LPCAT2	0.01748251748251748	3.469446951953614E-18
386	PSG4	0.01567152483936687	386	PSG4	0.01567152483936687	0.0	386	IL16	0.01722356183258698	386	IL16	0.017223561832586977	3.469446951953614E-18	386	TNFRSF9	0.015213753232922561	386	TNFRSF9	0.015213753232922563	1.734723475976807E-18	386	DTX3L	0.01712035610340695	386	DTX3L	0.01712035610340695	0.0	386	MAEL	0.01892863903085368	386	MAEL	0.01892863903085368	0.0	386	CAPNS2	0.017482517482517484	386	CAPNS2	0.01748251748251748	3.469446951953614E-18
387	PSG2	0.01567152483936687	387	PSG2	0.01567152483936687	0.0	387	TREML2	0.01722356183258698	387	TREML2	0.017223561832586977	3.469446951953614E-18	387	CCL23	0.015213753232922561	387	CCL23	0.015213753232922563	1.734723475976807E-18	387	EVI2A	0.01712035610340695	387	EVI2A	0.01712035610340695	0.0	387	WNT4	0.01892863903085368	387	WNT4	0.01892863903085368	0.0	387	GJB2	0.017482517482517484	387	GJB2	0.01748251748251748	3.469446951953614E-18
388	ACVR2A	0.01567152483936687	388	ACVR2A	0.01567152483936687	0.0	388	STX12	0.01722356183258698	388	STX12	0.017223561832586977	3.469446951953614E-18	388	SERPINB13	0.015213753232922561	388	SERPINB13	0.015213753232922563	1.734723475976807E-18	388	ST3GAL6	0.01712035610340695	388	ST3GAL6	0.01712035610340695	0.0	388	TREML2	0.01892863903085368	388	TREML2	0.01892863903085368	0.0	388	GJB6	0.017482517482517484	388	GJB6	0.01748251748251748	3.469446951953614E-18
389	RASSF9	0.01567152483936687	389	RASSF9	0.01567152483936687	0.0	389	ZMIZ1	0.01722356183258698	389	ZMIZ1	0.017223561832586977	3.469446951953614E-18	389	TBC1D2B	0.015213753232922561	389	TBC1D2B	0.015213753232922563	1.734723475976807E-18	389	GABPB2	0.01712035610340695	389	GABPB2	0.01712035610340695	0.0	389	STX12	0.01892863903085368	389	STX12	0.01892863903085368	0.0	389	KLF6	0.017482517482517484	389	KLF6	0.01748251748251748	3.469446951953614E-18
390	RASSF5	0.01567152483936687	390	RASSF5	0.01567152483936687	0.0	390	COLGALT2	0.01722356183258698	390	COLGALT2	0.017223561832586977	3.469446951953614E-18	390	TMEM91	0.015213753232922561	390	TMEM91	0.015213753232922563	1.734723475976807E-18	390	GBGT1	0.01712035610340695	390	GBGT1	0.01712035610340695	0.0	390	LIPA	0.01892863903085368	390	LIPA	0.01892863903085368	0.0	390	KLF9	0.017482517482517484	390	KLF9	0.01748251748251748	3.469446951953614E-18
391	KCND3	0.01567152483936687	391	KCND3	0.01567152483936687	0.0	391	LIPA	0.01722356183258698	391	LIPA	0.017223561832586977	3.469446951953614E-18	391	MGLL	0.015213753232922561	391	MGLL	0.015213753232922563	1.734723475976807E-18	391	ANKS1B	0.01712035610340695	391	ANKS1B	0.01712035610340695	0.0	391	ROGDI	0.01892863903085368	391	ROGDI	0.01892863903085368	0.0	391	ACER3	0.017482517482517484	391	ACER3	0.01748251748251748	3.469446951953614E-18
392	KREMEN1	0.01567152483936687	392	KREMEN1	0.01567152483936687	0.0	392	BIRC7	0.01722356183258698	392	BIRC7	0.017223561832586977	3.469446951953614E-18	392	CYSTM1	0.015213753232922561	392	CYSTM1	0.015213753232922563	1.734723475976807E-18	392	SYNGR2	0.01712035610340695	392	SYNGR2	0.01712035610340695	0.0	392	CD6	0.01892863903085368	392	CD6	0.01892863903085368	0.0	392	P2RY8	0.017482517482517484	392	P2RY8	0.01748251748251748	3.469446951953614E-18
393	IL1R2	0.01567152483936687	393	IL1R2	0.01567152483936687	0.0	393	CD6	0.01722356183258698	393	CD6	0.017223561832586977	3.469446951953614E-18	393	DCDC1	0.015213753232922561	393	DCDC1	0.015213753232922563	1.734723475976807E-18	393	CLEC12A	0.01712035610340695	393	CLEC12A	0.01712035610340695	0.0	393	GNAT2	0.01892863903085368	393	GNAT2	0.01892863903085368	0.0	393	MMP28	0.017482517482517484	393	MMP28	0.01748251748251748	3.469446951953614E-18
394	CLEC3B	0.01567152483936687	394	CLEC3B	0.01567152483936687	0.0	394	GNAT2	0.01722356183258698	394	GNAT2	0.017223561832586977	3.469446951953614E-18	394	GSTO1	0.015213753232922561	394	GSTO1	0.015213753232922563	1.734723475976807E-18	394	PRR5L	0.01712035610340695	394	PRR5L	0.01712035610340695	0.0	394	TNFSF12-TNFSF13	0.01892863903085368	394	TNFSF12-TNFSF13	0.01892863903085368	0.0	394	LRRC10B	0.017482517482517484	394	LRRC10B	0.01748251748251748	3.469446951953614E-18
395	DNAJC22	0.01567152483936687	395	DNAJC22	0.01567152483936687	0.0	395	TNFSF12-TNFSF13	0.01722356183258698	395	TNFSF12-TNFSF13	0.017223561832586977	3.469446951953614E-18	395	TMPRSS13	0.015213753232922561	395	TMPRSS13	0.015213753232922563	1.734723475976807E-18	395	CPED1	0.01712035610340695	395	CPED1	0.01712035610340695	0.0	395	P2RX4	0.01892863903085368	395	P2RX4	0.01892863903085368	0.0	395	ITLN1	0.017482517482517484	395	ITLN1	0.01748251748251748	3.469446951953614E-18
396	LRRK1	0.01567152483936687	396	LRRK1	0.01567152483936687	0.0	396	P2RX4	0.01722356183258698	396	P2RX4	0.017223561832586977	3.469446951953614E-18	396	GLYATL3	0.015213753232922561	396	GLYATL3	0.015213753232922563	1.734723475976807E-18	396	HAVCR2	0.01712035610340695	396	HAVCR2	0.01712035610340695	0.0	396	PI16	0.01892863903085368	396	PI16	0.01892863903085368	0.0	396	PDE1A	0.017482517482517484	396	PDE1A	0.01748251748251748	3.469446951953614E-18
397	CAP2	0.01567152483936687	397	CAP2	0.01567152483936687	0.0	397	DPP9	0.01722356183258698	397	DPP9	0.017223561832586977	3.469446951953614E-18	397	CD14	0.015213753232922561	397	CD14	0.015213753232922563	1.734723475976807E-18	397	GPR55	0.01712035610340695	397	GPR55	0.01712035610340695	0.0	397	ANXA4	0.01892863903085368	397	ANXA4	0.01892863903085368	0.0	397	EEPD1	0.017482517482517484	397	EEPD1	0.01748251748251748	3.469446951953614E-18
398	CAPS	0.01567152483936687	398	CAPS	0.01567152483936687	0.0	398	ANXA4	0.01722356183258698	398	ANXA4	0.017223561832586977	3.469446951953614E-18	398	MPP1	0.015213753232922561	398	MPP1	0.015213753232922563	1.734723475976807E-18	398	ADAM19	0.01712035610340695	398	ADAM19	0.01712035610340695	0.0	398	SAMHD1	0.01892863903085368	398	SAMHD1	0.01892863903085368	0.0	398	PEAR1	0.017482517482517484	398	PEAR1	0.01748251748251748	3.469446951953614E-18
399	RHOC	0.01567152483936687	399	RHOC	0.01567152483936687	0.0	399	GPD1L	0.01722356183258698	399	GPD1L	0.017223561832586977	3.469446951953614E-18	399	TRIM47	0.015213753232922561	399	TRIM47	0.015213753232922563	1.734723475976807E-18	399	HCFC2	0.01712035610340695	399	HCFC2	0.01712035610340695	0.0	399	PCP2	0.01892863903085368	399	PCP2	0.01892863903085368	0.0	399	IKBKG	0.017482517482517484	399	IKBKG	0.01748251748251748	3.469446951953614E-18
400	PTGES	0.01567152483936687	400	PTGES	0.01567152483936687	0.0	400	SAMHD1	0.01722356183258698	400	SAMHD1	0.017223561832586977	3.469446951953614E-18	400	AKR7A2	0.015213753232922561	400	AKR7A2	0.015213753232922563	1.734723475976807E-18	400	RFTN1	0.01712035610340695	400	RFTN1	0.01712035610340695	0.0	400	RNFT1	0.01892863903085368	400	RNFT1	0.01892863903085368	0.0	400	IKBKE	0.017482517482517484	400	IKBKE	0.01748251748251748	3.469446951953614E-18
401	ETHE1	0.01567152483936687	401	ETHE1	0.01567152483936687	0.0	401	PCP2	0.01722356183258698	401	PCP2	0.017223561832586977	3.469446951953614E-18	401	LHFPL2	0.015213753232922561	401	LHFPL2	0.015213753232922563	1.734723475976807E-18	401	ZBP1	0.01712035610340695	401	ZBP1	0.01712035610340695	0.0	401	CRIM1	0.01892863903085368	401	CRIM1	0.01892863903085368	0.0	401	UBXN11	0.017482517482517484	401	UBXN11	0.01748251748251748	3.469446951953614E-18
402	PSG5	0.01567152483936687	402	PSG5	0.01567152483936687	0.0	402	RNFT1	0.01722356183258698	402	RNFT1	0.017223561832586977	3.469446951953614E-18	402	CAPG	0.015213753232922561	402	CAPG	0.015213753232922563	1.734723475976807E-18	402	LIX1L	0.01712035610340695	402	LIX1L	0.01712035610340695	0.0	402	TIMP3	0.01892863903085368	402	TIMP3	0.01892863903085368	0.0	402	B3GNT5	0.017482517482517484	402	B3GNT5	0.01748251748251748	3.469446951953614E-18
403	GREM2	0.01567152483936687	403	GREM2	0.01567152483936687	0.0	403	MCF2L2	0.01722356183258698	403	MCF2L2	0.017223561832586977	3.469446951953614E-18	403	ADCY10	0.015213753232922561	403	ADCY10	0.015213753232922563	1.734723475976807E-18	403	USP15	0.01712035610340695	403	USP15	0.01712035610340695	0.0	403	MCF2L2	0.01892863903085368	403	MCF2L2	0.01892863903085368	0.0	403	MAPK13	0.017482517482517484	403	MAPK13	0.01748251748251748	3.469446951953614E-18
404	CD248	0.01567152483936687	404	CD248	0.01567152483936687	0.0	404	SELPLG	0.01722356183258698	404	SELPLG	0.017223561832586977	3.469446951953614E-18	404	MPG	0.015213753232922561	404	MPG	0.015213753232922563	1.734723475976807E-18	404	RNF166	0.01712035610340695	404	RNF166	0.01712035610340695	0.0	404	LEPROT	0.01892863903085368	404	LEPROT	0.01892863903085368	0.0	404	DEFA3	0.017482517482517484	404	DEFA3	0.01748251748251748	3.469446951953614E-18
405	FBXL15	0.01567152483936687	405	FBXL15	0.01567152483936687	0.0	405	DENND2D	0.01722356183258698	405	DENND2D	0.017223561832586977	3.469446951953614E-18	405	GSG1	0.015213753232922561	405	GSG1	0.015213753232922563	1.734723475976807E-18	405	TMEM26	0.01712035610340695	405	TMEM26	0.01712035610340695	0.0	405	SELPLG	0.01892863903085368	405	SELPLG	0.01892863903085368	0.0	405	NABP1	0.017482517482517484	405	NABP1	0.01748251748251748	3.469446951953614E-18
406	CYBA	0.01567152483936687	406	CYBA	0.01567152483936687	0.0	406	ADGB	0.01722356183258698	406	ADGB	0.017223561832586977	3.469446951953614E-18	406	PRB2	0.015213753232922561	406	PRB2	0.015213753232922563	1.734723475976807E-18	406	ADAM28	0.01712035610340695	406	ADAM28	0.01712035610340695	0.0	406	RNASEK	0.01892863903085368	406	RNASEK	0.01892863903085368	0.0	406	EDEM1	0.017482517482517484	406	EDEM1	0.01748251748251748	3.469446951953614E-18
407	BATF2	0.01567152483936687	407	BATF2	0.01567152483936687	0.0	407	RNASEL	0.01722356183258698	407	RNASEL	0.017223561832586977	3.469446951953614E-18	407	ABCG2	0.015213753232922561	407	ABCG2	0.015213753232922563	1.734723475976807E-18	407	MALT1	0.01712035610340695	407	MALT1	0.01712035610340695	0.0	407	RNASEL	0.01892863903085368	407	RNASEL	0.01892863903085368	0.0	407	SNAI3	0.017482517482517484	407	SNAI3	0.01748251748251748	3.469446951953614E-18
408	GAMT	0.01567152483936687	408	GAMT	0.01567152483936687	0.0	408	WHAMM	0.01722356183258698	408	WHAMM	0.017223561832586977	3.469446951953614E-18	408	SORT1	0.015213753232922561	408	SORT1	0.015213753232922563	1.734723475976807E-18	408	MS4A4A	0.01712035610340695	408	MS4A4A	0.01712035610340695	0.0	408	WHAMM	0.01892863903085368	408	WHAMM	0.01892863903085368	0.0	408	SLC2A6	0.017482517482517484	408	SLC2A6	0.01748251748251748	3.469446951953614E-18
409	DCSTAMP	0.01567152483936687	409	DCSTAMP	0.01567152483936687	0.0	409	RNASE4	0.01722356183258698	409	RNASE4	0.017223561832586977	3.469446951953614E-18	409	ANKRD22	0.015213753232922561	409	ANKRD22	0.015213753232922563	1.734723475976807E-18	409	ERMAP	0.01712035610340695	409	ERMAP	0.01712035610340695	0.0	409	LYN	0.01892863903085368	409	LYN	0.01892863903085368	0.0	409	DYNLT3	0.017482517482517484	409	DYNLT3	0.01748251748251748	3.469446951953614E-18
410	FCER1G	0.01567152483936687	410	FCER1G	0.01567152483936687	0.0	410	LY9	0.01722356183258698	410	LY9	0.017223561832586977	3.469446951953614E-18	410	ZFYVE26	0.015213753232922561	410	ZFYVE26	0.015213753232922563	1.734723475976807E-18	410	NPL	0.01712035610340695	410	NPL	0.01712035610340695	0.0	410	FBXL8	0.01892863903085368	410	FBXL8	0.01892863903085368	0.0	410	ME1	0.017482517482517484	410	ME1	0.01748251748251748	3.469446951953614E-18
411	PTGDS	0.01567152483936687	411	PTGDS	0.01567152483936687	0.0	411	LYN	0.01722356183258698	411	LYN	0.017223561832586977	3.469446951953614E-18	411	SLFN12L	0.015213753232922561	411	SLFN12L	0.015213753232922563	1.734723475976807E-18	411	CD300E	0.01712035610340695	411	CD300E	0.01712035610340695	0.0	411	DOK1	0.01892863903085368	411	DOK1	0.01892863903085368	0.0	411	TNFAIP8L2	0.017482517482517484	411	TNFAIP8L2	0.01748251748251748	3.469446951953614E-18
412	RGL1	0.01567152483936687	412	RGL1	0.01567152483936687	0.0	412	FBXL8	0.01722356183258698	412	FBXL8	0.017223561832586977	3.469446951953614E-18	412	NCKAP1L	0.015213753232922561	412	NCKAP1L	0.015213753232922563	1.734723475976807E-18	412	FFAR4	0.01712035610340695	412	FFAR4	0.01712035610340695	0.0	412	TLR6	0.01892863903085368	412	TLR6	0.01892863903085368	0.0	412	TNFAIP8L1	0.017482517482517484	412	TNFAIP8L1	0.01748251748251748	3.469446951953614E-18
413	ZFP36L2	0.01567152483936687	413	ZFP36L2	0.01567152483936687	0.0	413	KIAA0930	0.01722356183258698	413	KIAA0930	0.017223561832586977	3.469446951953614E-18	413	DOCK2	0.015213753232922561	413	DOCK2	0.015213753232922563	1.734723475976807E-18	413	GSTM3	0.01712035610340695	413	GSTM3	0.01712035610340695	0.0	413	NFKBIA	0.01892863903085368	413	NFKBIA	0.01892863903085368	0.0	413	DNASE2B	0.017482517482517484	413	DNASE2B	0.01748251748251748	3.469446951953614E-18
414	COMMD5	0.01567152483936687	414	COMMD5	0.01567152483936687	0.0	414	DOK1	0.01722356183258698	414	DOK1	0.017223561832586977	3.469446951953614E-18	414	LPCAT2	0.015213753232922561	414	LPCAT2	0.015213753232922563	1.734723475976807E-18	414	RASGRP4	0.01712035610340695	414	RASGRP4	0.01712035610340695	0.0	414	CYTIP	0.01892863903085368	414	CYTIP	0.01892863903085368	0.0	414	ADAMTSL5	0.017482517482517484	414	ADAMTSL5	0.01748251748251748	3.469446951953614E-18
415	TACC1	0.01567152483936687	415	TACC1	0.01567152483936687	0.0	415	ZADH2	0.01722356183258698	415	ZADH2	0.017223561832586977	3.469446951953614E-18	415	CAPNS2	0.015213753232922561	415	CAPNS2	0.015213753232922563	1.734723475976807E-18	415	UBE2D4	0.01712035610340695	415	UBE2D4	0.01712035610340695	0.0	415	TMEM119	0.01892863903085368	415	TMEM119	0.01892863903085368	0.0	415	TCP11L2	0.017482517482517484	415	TCP11L2	0.01748251748251748	3.469446951953614E-18
416	MEIG1	0.01567152483936687	416	MEIG1	0.01567152483936687	0.0	416	ADAMDEC1	0.01722356183258698	416	ADAMDEC1	0.017223561832586977	3.469446951953614E-18	416	GJB2	0.015213753232922561	416	GJB2	0.015213753232922563	1.734723475976807E-18	416	FAM151B	0.01712035610340695	416	FAM151B	0.01712035610340695	0.0	416	DPEP2	0.01892863903085368	416	DPEP2	0.01892863903085368	0.0	416	CEACAM5	0.017482517482517484	416	CEACAM5	0.01748251748251748	3.469446951953614E-18
417	APLN	0.01567152483936687	417	APLN	0.01567152483936687	0.0	417	TLR6	0.01722356183258698	417	TLR6	0.017223561832586977	3.469446951953614E-18	417	GJB6	0.015213753232922561	417	GJB6	0.015213753232922563	1.734723475976807E-18	417	KCNK13	0.01712035610340695	417	KCNK13	0.01712035610340695	0.0	417	SPTB	0.01892863903085368	417	SPTB	0.01892863903085368	0.0	417	CEACAM4	0.017482517482517484	417	CEACAM4	0.01748251748251748	3.469446951953614E-18
418	HIVEP3	0.01567152483936687	418	HIVEP3	0.01567152483936687	0.0	418	NFKBIA	0.01722356183258698	418	NFKBIA	0.017223561832586977	3.469446951953614E-18	418	KLF6	0.015213753232922561	418	KLF6	0.015213753232922563	1.734723475976807E-18	418	CTSH	0.01712035610340695	418	CTSH	0.01712035610340695	0.0	418	CD44	0.01892863903085368	418	CD44	0.01892863903085368	0.0	418	TLDC2	0.017482517482517484	418	TLDC2	0.01748251748251748	3.469446951953614E-18
419	PIFO	0.01567152483936687	419	PIFO	0.01567152483936687	0.0	419	CYTIP	0.01722356183258698	419	CYTIP	0.017223561832586977	3.469446951953614E-18	419	KLF5	0.015213753232922561	419	KLF5	0.015213753232922563	1.734723475976807E-18	419	LEKR1	0.01712035610340695	419	LEKR1	0.01712035610340695	0.0	419	ASIC1	0.01892863903085368	419	ASIC1	0.01892863903085368	0.0	419	PLEK2	0.017482517482517484	419	PLEK2	0.01748251748251748	3.469446951953614E-18
420	P2RX1	0.01567152483936687	420	P2RX1	0.01567152483936687	0.0	420	DPEP2	0.01722356183258698	420	DPEP2	0.017223561832586977	3.469446951953614E-18	420	KLF9	0.015213753232922561	420	KLF9	0.015213753232922563	1.734723475976807E-18	420	TK2	0.01712035610340695	420	TK2	0.01712035610340695	0.0	420	IFI6	0.01892863903085368	420	IFI6	0.01892863903085368	0.0	420	SSC5D	0.017482517482517484	420	SSC5D	0.01748251748251748	3.469446951953614E-18
421	CORO7	0.01567152483936687	421	CORO7	0.01567152483936687	0.0	421	CHN2	0.01722356183258698	421	CHN2	0.017223561832586977	3.469446951953614E-18	421	FAM216B	0.015213753232922561	421	FAM216B	0.015213753232922563	1.734723475976807E-18	421	SOAT2	0.01712035610340695	421	SOAT2	0.01712035610340695	0.0	421	PIK3R5	0.01892863903085368	421	PIK3R5	0.01892863903085368	0.0	421	MREG	0.017482517482517484	421	MREG	0.01748251748251748	3.469446951953614E-18
422	HSD11B1	0.01567152483936687	422	HSD11B1	0.01567152483936687	0.0	422	CD44	0.01722356183258698	422	CD44	0.017223561832586977	3.469446951953614E-18	422	P2RY8	0.015213753232922561	422	P2RY8	0.015213753232922563	1.734723475976807E-18	422	THEM6	0.01712035610340695	422	THEM6	0.01712035610340695	0.0	422	FGF1	0.01892863903085368	422	FGF1	0.01892863903085368	0.0	422	KRT77	0.017482517482517484	422	KRT77	0.01748251748251748	3.469446951953614E-18
423	TNFSF8	0.01567152483936687	423	TNFSF8	0.01567152483936687	0.0	423	IFI6	0.01722356183258698	423	IFI6	0.017223561832586977	3.469446951953614E-18	423	ENDOD1	0.015213753232922561	423	ENDOD1	0.015213753232922563	1.734723475976807E-18	423	AKAP13	0.01712035610340695	423	AKAP13	0.01712035610340695	0.0	423	CD300A	0.01892863903085368	423	CD300A	0.01892863903085368	0.0	423	KRT76	0.017482517482517484	423	KRT76	0.01748251748251748	3.469446951953614E-18
424	EVI2B	0.01567152483936687	424	EVI2B	0.01567152483936687	0.0	424	PIK3R5	0.01722356183258698	424	PIK3R5	0.017223561832586977	3.469446951953614E-18	424	EEPD1	0.015213753232922561	424	EEPD1	0.015213753232922563	1.734723475976807E-18	424	GABARAP	0.01712035610340695	424	GABARAP	0.01712035610340695	0.0	424	TNFAIP3	0.01892863903085368	424	TNFAIP3	0.01892863903085368	0.0	424	PSMB10	0.017482517482517484	424	PSMB10	0.01748251748251748	3.469446951953614E-18
425	IL6ST	0.01567152483936687	425	IL6ST	0.01567152483936687	0.0	425	CD300A	0.01722356183258698	425	CD300A	0.017223561832586977	3.469446951953614E-18	425	SFTPB	0.015213753232922561	425	SFTPB	0.015213753232922563	1.734723475976807E-18	425	EPS8L3	0.01712035610340695	425	EPS8L3	0.01712035610340695	0.0	425	ELOVL1	0.01892863903085368	425	ELOVL1	0.01892863903085368	0.0	425	KRT79	0.017482517482517484	425	KRT79	0.01748251748251748	3.469446951953614E-18
426	SNAP91	0.01567152483936687	426	SNAP91	0.01567152483936687	0.0	426	TNFAIP3	0.01722356183258698	426	TNFAIP3	0.017223561832586977	3.469446951953614E-18	426	PEAR1	0.015213753232922561	426	PEAR1	0.015213753232922563	1.734723475976807E-18	426	LONRF3	0.01712035610340695	426	LONRF3	0.01712035610340695	0.0	426	BAIAP2	0.01892863903085368	426	BAIAP2	0.01892863903085368	0.0	426	FAM81A	0.017482517482517484	426	FAM81A	0.01748251748251748	3.469446951953614E-18
427	UPP2	0.01567152483936687	427	UPP2	0.01567152483936687	0.0	427	ELOVL1	0.01722356183258698	427	ELOVL1	0.017223561832586977	3.469446951953614E-18	427	IKBKG	0.015213753232922561	427	IKBKG	0.015213753232922563	1.734723475976807E-18	427	TREML1	0.01712035610340695	427	TREML1	0.01712035610340695	0.0	427	DTX3L	0.01892863903085368	427	DTX3L	0.01892863903085368	0.0	427	HAAO	0.017482517482517484	427	HAAO	0.01748251748251748	3.469446951953614E-18
428	KIAA0319	0.01567152483936687	428	KIAA0319	0.01567152483936687	0.0	428	BAIAP2	0.01722356183258698	428	BAIAP2	0.017223561832586977	3.469446951953614E-18	428	IKBKE	0.015213753232922561	428	IKBKE	0.015213753232922563	1.734723475976807E-18	428	TMEM150B	0.01712035610340695	428	TMEM150B	0.01712035610340695	0.0	428	TNC	0.01892863903085368	428	TNC	0.01892863903085368	0.0	428	SLC1A2	0.017482517482517484	428	SLC1A2	0.01748251748251748	3.469446951953614E-18
429	COMMD9	0.01567152483936687	429	COMMD9	0.01567152483936687	0.0	429	DTX3L	0.01722356183258698	429	DTX3L	0.017223561832586977	3.469446951953614E-18	429	UBXN11	0.015213753232922561	429	UBXN11	0.015213753232922563	1.734723475976807E-18	429	ALOX5AP	0.01712035610340695	429	ALOX5AP	0.01712035610340695	0.0	429	F5	0.01892863903085368	429	F5	0.01892863903085368	0.0	429	ITGBL1	0.017482517482517484	429	ITGBL1	0.01748251748251748	3.469446951953614E-18
430	PTGER4	0.01567152483936687	430	PTGER4	0.01567152483936687	0.0	430	EVI2A	0.01722356183258698	430	EVI2A	0.017223561832586977	3.469446951953614E-18	430	MAPK13	0.015213753232922561	430	MAPK13	0.015213753232922563	1.734723475976807E-18	430	TSPYL6	0.01712035610340695	430	TSPYL6	0.01712035610340695	0.0	430	ECT2L	0.01892863903085368	430	ECT2L	0.01892863903085368	0.0	430	OSTM1	0.017482517482517484	430	OSTM1	0.01748251748251748	3.469446951953614E-18
431	TKTL2	0.01567152483936687	431	TKTL2	0.01567152483936687	0.0	431	RETSAT	0.01722356183258698	431	RETSAT	0.017223561832586977	3.469446951953614E-18	431	NABP1	0.015213753232922561	431	NABP1	0.015213753232922563	1.734723475976807E-18	431	CTSW	0.01712035610340695	431	CTSW	0.01712035610340695	0.0	431	RETSAT	0.01892863903085368	431	RETSAT	0.01892863903085368	0.0	431	ALPK2	0.017482517482517484	431	ALPK2	0.01748251748251748	3.469446951953614E-18
432	FAM114A1	0.01567152483936687	432	FAM114A1	0.01567152483936687	0.0	432	ST3GAL6	0.01722356183258698	432	ST3GAL6	0.017223561832586977	3.469446951953614E-18	432	EDEM1	0.015213753232922561	432	EDEM1	0.015213753232922563	1.734723475976807E-18	432	MEF2C	0.01712035610340695	432	MEF2C	0.01712035610340695	0.0	432	FOXP4	0.01892863903085368	432	FOXP4	0.01892863903085368	0.0	432	S1PR1	0.017482517482517484	432	S1PR1	0.01748251748251748	3.469446951953614E-18
433	B3GALT4	0.01567152483936687	433	B3GALT4	0.01567152483936687	0.0	433	GABPB2	0.01722356183258698	433	GABPB2	0.017223561832586977	3.469446951953614E-18	433	SNAI3	0.015213753232922561	433	SNAI3	0.015213753232922563	1.734723475976807E-18	433	COX19	0.01712035610340695	433	COX19	0.01712035610340695	0.0	433	ST3GAL6	0.01892863903085368	433	ST3GAL6	0.01892863903085368	0.0	433	SASH3	0.017482517482517484	433	SASH3	0.01748251748251748	3.469446951953614E-18
434	SLC38A6	0.01567152483936687	434	SLC38A6	0.01567152483936687	0.0	434	GBGT1	0.01722356183258698	434	GBGT1	0.017223561832586977	3.469446951953614E-18	434	RINL	0.015213753232922561	434	RINL	0.015213753232922563	1.734723475976807E-18	434	NUBP1	0.01712035610340695	434	NUBP1	0.01712035610340695	0.0	434	GBGT1	0.01892863903085368	434	GBGT1	0.01892863903085368	0.0	434	CFLAR	0.017482517482517484	434	CFLAR	0.01748251748251748	3.469446951953614E-18
435	B3GALT2	0.01567152483936687	435	B3GALT2	0.01567152483936687	0.0	435	ANKRD34A	0.01722356183258698	435	ANKRD34A	0.017223561832586977	3.469446951953614E-18	435	SLC2A6	0.015213753232922561	435	SLC2A6	0.015213753232922563	1.734723475976807E-18	435	CXCR4	0.01712035610340695	435	CXCR4	0.01712035610340695	0.0	435	ANKRD34C	0.01892863903085368	435	ANKRD34C	0.01892863903085368	0.0	435	FDCSP	0.017482517482517484	435	FDCSP	0.01748251748251748	3.469446951953614E-18
436	CRTAM	0.01567152483936687	436	CRTAM	0.01567152483936687	0.0	436	ANKS1B	0.01722356183258698	436	ANKS1B	0.017223561832586977	3.469446951953614E-18	436	DYNLT3	0.015213753232922561	436	DYNLT3	0.015213753232922563	1.734723475976807E-18	436	ZNF366	0.01712035610340695	436	ZNF366	0.01712035610340695	0.0	436	THNSL2	0.01892863903085368	436	THNSL2	0.01892863903085368	0.0	436	DMXL2	0.017482517482517484	436	DMXL2	0.01748251748251748	3.469446951953614E-18
437	MTUS1	0.01567152483936687	437	MTUS1	0.01567152483936687	0.0	437	ADTRP	0.01722356183258698	437	ADTRP	0.017223561832586977	3.469446951953614E-18	437	ME1	0.015213753232922561	437	ME1	0.015213753232922563	1.734723475976807E-18	437	C1orf115	0.01712035610340695	437	C1orf115	0.01712035610340695	0.0	437	SIL1	0.01892863903085368	437	SIL1	0.01892863903085368	0.0	437	SLC22A18	0.017482517482517484	437	SLC22A18	0.01748251748251748	3.469446951953614E-18
438	APBA1	0.01567152483936687	438	APBA1	0.01567152483936687	0.0	438	SYNGR2	0.01722356183258698	438	SYNGR2	0.017223561832586977	3.469446951953614E-18	438	RHD	0.015213753232922561	438	RHD	0.015213753232922563	1.734723475976807E-18	438	CATSPER1	0.01712035610340695	438	CATSPER1	0.01712035610340695	0.0	438	ADTRP	0.01892863903085368	438	ADTRP	0.01892863903085368	0.0	438	SLC22A16	0.017482517482517484	438	SLC22A16	0.01748251748251748	3.469446951953614E-18
439	CXCL16	0.01567152483936687	439	CXCL16	0.01567152483936687	0.0	439	CLEC12A	0.01722356183258698	439	CLEC12A	0.017223561832586977	3.469446951953614E-18	439	TNFAIP8L2	0.015213753232922561	439	TNFAIP8L2	0.015213753232922563	1.734723475976807E-18	439	PLEKHO1	0.01712035610340695	439	PLEKHO1	0.01712035610340695	0.0	439	CLEC12A	0.01892863903085368	439	CLEC12A	0.01892863903085368	0.0	439	ACOX1	0.017482517482517484	439	ACOX1	0.01748251748251748	3.469446951953614E-18
440	AKAP6	0.01567152483936687	440	AKAP6	0.01567152483936687	0.0	440	CPED1	0.01722356183258698	440	CPED1	0.017223561832586977	3.469446951953614E-18	440	TNFAIP8L1	0.015213753232922561	440	TNFAIP8L1	0.015213753232922563	1.734723475976807E-18	440	NRP1	0.01712035610340695	440	NRP1	0.01712035610340695	0.0	440	CPED1	0.01892863903085368	440	CPED1	0.01892863903085368	0.0	440	CFD	0.017482517482517484	440	CFD	0.01748251748251748	3.469446951953614E-18
441	DBNL	0.01567152483936687	441	DBNL	0.01567152483936687	0.0	441	HAVCR2	0.01722356183258698	441	HAVCR2	0.017223561832586977	3.469446951953614E-18	441	DNASE2B	0.015213753232922561	441	DNASE2B	0.015213753232922563	1.734723475976807E-18	441	FUT6	0.01712035610340695	441	FUT6	0.01712035610340695	0.0	441	IDH3A	0.01892863903085368	441	IDH3A	0.01892863903085368	0.0	441	DAGLA	0.017482517482517484	441	DAGLA	0.01748251748251748	3.469446951953614E-18
442	CD1C	0.01567152483936687	442	CD1C	0.01567152483936687	0.0	442	GPR55	0.01722356183258698	442	GPR55	0.017223561832586977	3.469446951953614E-18	442	TCP11L2	0.015213753232922561	442	TCP11L2	0.015213753232922563	1.734723475976807E-18	442	BRI3BP	0.01712035610340695	442	BRI3BP	0.01712035610340695	0.0	442	HCFC2	0.01892863903085368	442	HCFC2	0.01892863903085368	0.0	442	ABCB10	0.017482517482517484	442	ABCB10	0.01748251748251748	3.469446951953614E-18
443	RAB7A	0.01567152483936687	443	RAB7A	0.01567152483936687	0.0	443	HCFC2	0.01722356183258698	443	HCFC2	0.017223561832586977	3.469446951953614E-18	443	CEACAM5	0.015213753232922561	443	CEACAM5	0.015213753232922563	1.734723475976807E-18	443	CTBS	0.01712035610340695	443	CTBS	0.01712035610340695	0.0	443	DGKI	0.01892863903085368	443	DGKI	0.01892863903085368	0.0	443	CYP17A1	0.017482517482517484	443	CYP17A1	0.01748251748251748	3.469446951953614E-18
444	ARHGAP9	0.01567152483936687	444	ARHGAP9	0.01567152483936687	0.0	444	RFTN1	0.01722356183258698	444	RFTN1	0.017223561832586977	3.469446951953614E-18	444	CEACAM4	0.015213753232922561	444	CEACAM4	0.015213753232922563	1.734723475976807E-18	444	ARHGEF1	0.01712035610340695	444	ARHGEF1	0.01712035610340695	0.0	444	ZBP1	0.01892863903085368	444	ZBP1	0.01892863903085368	0.0	444	ALOX15	0.017482517482517484	444	ALOX15	0.01748251748251748	3.469446951953614E-18
445	GPR137B	0.01567152483936687	445	GPR137B	0.01567152483936687	0.0	445	ZBP1	0.01722356183258698	445	ZBP1	0.017223561832586977	3.469446951953614E-18	445	CEACAM7	0.015213753232922561	445	CEACAM7	0.015213753232922563	1.734723475976807E-18	445	RAMP1	0.01712035610340695	445	RAMP1	0.01712035610340695	0.0	445	TDRD10	0.01892863903085368	445	TDRD10	0.01892863903085368	0.0	445	FUT7	0.017482517482517484	445	FUT7	0.01748251748251748	3.469446951953614E-18
446	CHIC2	0.01567152483936687	446	CHIC2	0.01567152483936687	0.0	446	TDRD10	0.01722356183258698	446	TDRD10	0.017223561832586977	3.469446951953614E-18	446	LRRTM2	0.015213753232922561	446	LRRTM2	0.015213753232922563	1.734723475976807E-18	446	TMEM229B	0.01712035610340695	446	TMEM229B	0.01712035610340695	0.0	446	LIX1L	0.01892863903085368	446	LIX1L	0.01892863903085368	0.0	446	IL18RAP	0.017482517482517484	446	IL18RAP	0.01748251748251748	3.469446951953614E-18
447	WDR47	0.01567152483936687	447	WDR47	0.01567152483936687	0.0	447	LIX1L	0.01722356183258698	447	LIX1L	0.017223561832586977	3.469446951953614E-18	447	ANGPT2	0.015213753232922561	447	ANGPT2	0.015213753232922563	1.734723475976807E-18	447	SSH1	0.01712035610340695	447	SSH1	0.01712035610340695	0.0	447	RGL2	0.01892863903085368	447	RGL2	0.01892863903085368	0.0	447	SUN2	0.017482517482517484	447	SUN2	0.01748251748251748	3.469446951953614E-18
448	TNFRSF9	0.01567152483936687	448	TNFRSF9	0.01567152483936687	0.0	448	AAK1	0.01722356183258698	448	AAK1	0.017223561832586977	3.469446951953614E-18	448	TLDC2	0.015213753232922561	448	TLDC2	0.015213753232922563	1.734723475976807E-18	448	RNF19B	0.01712035610340695	448	RNF19B	0.01712035610340695	0.0	448	ZBTB40	0.01892863903085368	448	ZBTB40	0.01892863903085368	0.0	448	ADCK2	0.017482517482517484	448	ADCK2	0.01748251748251748	3.469446951953614E-18
449	DIO3	0.01567152483936687	449	DIO3	0.01567152483936687	0.0	449	USP15	0.01722356183258698	449	USP15	0.017223561832586977	3.469446951953614E-18	449	ANGPT4	0.015213753232922561	449	ANGPT4	0.015213753232922563	1.734723475976807E-18	449	SLC41A2	0.01712035610340695	449	SLC41A2	0.01712035610340695	0.0	449	ZDHHC14	0.01892863903085368	449	ZDHHC14	0.01892863903085368	0.0	449	SLFN11	0.017482517482517484	449	SLFN11	0.01748251748251748	3.469446951953614E-18
450	CCL23	0.01567152483936687	450	CCL23	0.01567152483936687	0.0	450	RNF166	0.01722356183258698	450	RNF166	0.017223561832586977	3.469446951953614E-18	450	PLEK2	0.015213753232922561	450	PLEK2	0.015213753232922563	1.734723475976807E-18	450	CSF1	0.01712035610340695	450	CSF1	0.01712035610340695	0.0	450	PCSK6	0.01892863903085368	450	PCSK6	0.01892863903085368	0.0	450	PRKCE	0.017482517482517484	450	PRKCE	0.01748251748251748	3.469446951953614E-18
451	SLC30A2	0.01567152483936687	451	SLC30A2	0.01567152483936687	0.0	451	TMEM26	0.01722356183258698	451	TMEM26	0.017223561832586977	3.469446951953614E-18	451	MREG	0.015213753232922561	451	MREG	0.015213753232922563	1.734723475976807E-18	451	GPR68	0.01712035610340695	451	GPR68	0.01712035610340695	0.0	451	JPH2	0.01892863903085368	451	JPH2	0.01892863903085368	0.0	451	CES1	0.017482517482517484	451	CES1	0.01748251748251748	3.469446951953614E-18
452	MGLL	0.01567152483936687	452	MGLL	0.01567152483936687	0.0	452	ADAM28	0.01722356183258698	452	ADAM28	0.017223561832586977	3.469446951953614E-18	452	BTG1	0.015213753232922561	452	BTG1	0.015213753232922563	1.734723475976807E-18	452	CD300LB	0.01712035610340695	452	CD300LB	0.01712035610340695	0.0	452	MALT1	0.01892863903085368	452	MALT1	0.01892863903085368	0.0	452	C15orf61	0.017482517482517484	452	C15orf61	0.01748251748251748	3.469446951953614E-18
453	ARPC5	0.01567152483936687	453	ARPC5	0.01567152483936687	0.0	453	MALT1	0.01722356183258698	453	MALT1	0.017223561832586977	3.469446951953614E-18	453	SARDH	0.015213753232922561	453	SARDH	0.015213753232922563	1.734723475976807E-18	453	ERAP1	0.01712035610340695	453	ERAP1	0.01712035610340695	0.0	453	MS4A4A	0.01892863903085368	453	MS4A4A	0.01892863903085368	0.0	453	FFAR2	0.017482517482517484	453	FFAR2	0.01748251748251748	3.469446951953614E-18
454	CYSTM1	0.01567152483936687	454	CYSTM1	0.01567152483936687	0.0	454	MS4A4A	0.01722356183258698	454	MS4A4A	0.017223561832586977	3.469446951953614E-18	454	KRT76	0.015213753232922561	454	KRT76	0.015213753232922563	1.734723475976807E-18	454	TREM2	0.01712035610340695	454	TREM2	0.01712035610340695	0.0	454	CYP4X1	0.01892863903085368	454	CYP4X1	0.01892863903085368	0.0	454	CKLF-CMTM1	0.017482517482517484	454	CKLF-CMTM1	0.01748251748251748	3.469446951953614E-18
455	DCDC1	0.01567152483936687	455	DCDC1	0.01567152483936687	0.0	455	ERMAP	0.01722356183258698	455	ERMAP	0.017223561832586977	3.469446951953614E-18	455	PSMB10	0.015213753232922561	455	PSMB10	0.015213753232922563	1.734723475976807E-18	455	ANXA2	0.01712035610340695	455	ANXA2	0.01712035610340695	0.0	455	CD300E	0.01892863903085368	455	CD300E	0.01892863903085368	0.0	455	SLC6A20	0.017482517482517484	455	SLC6A20	0.01748251748251748	3.469446951953614E-18
456	FSIP1	0.01567152483936687	456	FSIP1	0.01567152483936687	0.0	456	NPL	0.01722356183258698	456	NPL	0.017223561832586977	3.469446951953614E-18	456	KRT79	0.015213753232922561	456	KRT79	0.015213753232922563	1.734723475976807E-18	456	LAYN	0.01712035610340695	456	LAYN	0.01712035610340695	0.0	456	FFAR4	0.01892863903085368	456	FFAR4	0.01892863903085368	0.0	456	ITPR1	0.017482517482517484	456	ITPR1	0.01748251748251748	3.469446951953614E-18
457	GSTO1	0.01567152483936687	457	GSTO1	0.01567152483936687	0.0	457	CD300E	0.01722356183258698	457	CD300E	0.017223561832586977	3.469446951953614E-18	457	FAM81A	0.015213753232922561	457	FAM81A	0.015213753232922563	1.734723475976807E-18	457	SIRPG	0.01712035610340695	457	SIRPG	0.01712035610340695	0.0	457	ACTA2	0.01892863903085368	457	ACTA2	0.01892863903085368	0.0	457	GPER1	0.017482517482517484	457	GPER1	0.01748251748251748	3.469446951953614E-18
458	CD14	0.01567152483936687	458	CD14	0.01567152483936687	0.0	458	FFAR4	0.01722356183258698	458	FFAR4	0.017223561832586977	3.469446951953614E-18	458	STXBP5	0.015213753232922561	458	STXBP5	0.015213753232922563	1.734723475976807E-18	458	TGFB1	0.01712035610340695	458	TGFB1	0.01712035610340695	0.0	458	RASGRP4	0.01892863903085368	458	RASGRP4	0.01892863903085368	0.0	458	HAMP	0.017482517482517484	458	HAMP	0.01748251748251748	3.469446951953614E-18
459	MPP1	0.01567152483936687	459	MPP1	0.01567152483936687	0.0	459	GPCPD1	0.01722356183258698	459	GPCPD1	0.017223561832586977	3.469446951953614E-18	459	HAAO	0.015213753232922561	459	HAAO	0.015213753232922563	1.734723475976807E-18	459	ANPEP	0.01712035610340695	459	ANPEP	0.01712035610340695	0.0	459	APOB	0.01892863903085368	459	APOB	0.01892863903085368	0.0	459	CCDC96	0.017482517482517484	459	CCDC96	0.01748251748251748	3.469446951953614E-18
460	RAP1B	0.01567152483936687	460	RAP1B	0.01567152483936687	0.0	460	GSTM3	0.01722356183258698	460	GSTM3	0.017223561832586977	3.469446951953614E-18	460	SLC1A2	0.015213753232922561	460	SLC1A2	0.015213753232922563	1.734723475976807E-18	460	TIFA	0.01712035610340695	460	TIFA	0.01712035610340695	0.0	460	FAM151B	0.01892863903085368	460	FAM151B	0.01892863903085368	0.0	460	MAP3K5	0.017482517482517484	460	MAP3K5	0.01748251748251748	3.469446951953614E-18
461	TRIM47	0.01567152483936687	461	TRIM47	0.01567152483936687	0.0	461	RASGRP4	0.01722356183258698	461	RASGRP4	0.017223561832586977	3.469446951953614E-18	461	ITGBL1	0.015213753232922561	461	ITGBL1	0.015213753232922563	1.734723475976807E-18	461	GLTPD2	0.01712035610340695	461	GLTPD2	0.01712035610340695	0.0	461	KCNK13	0.01892863903085368	461	KCNK13	0.01892863903085368	0.0	461	ZNF575	0.017482517482517484	461	ZNF575	0.01748251748251748	3.469446951953614E-18
462	AKR7A2	0.01567152483936687	462	AKR7A2	0.01567152483936687	0.0	462	FAM151B	0.01722356183258698	462	FAM151B	0.017223561832586977	3.469446951953614E-18	462	OSTM1	0.015213753232922561	462	OSTM1	0.015213753232922563	1.734723475976807E-18	462	PLA2G15	0.01712035610340695	462	PLA2G15	0.01712035610340695	0.0	462	LEKR1	0.01892863903085368	462	LEKR1	0.01892863903085368	0.0	462	GDPGP1	0.017482517482517484	462	GDPGP1	0.01748251748251748	3.469446951953614E-18
463	CAPG	0.01567152483936687	463	CAPG	0.01567152483936687	0.0	463	KCNK13	0.01722356183258698	463	KCNK13	0.017223561832586977	3.469446951953614E-18	463	ALPK2	0.015213753232922561	463	ALPK2	0.015213753232922563	1.734723475976807E-18	463	ANXA1	0.01712035610340695	463	ANXA1	0.01712035610340695	0.0	463	FBXO32	0.01892863903085368	463	FBXO32	0.01892863903085368	0.0	463	TPGS1	0.017482517482517484	463	TPGS1	0.01748251748251748	3.469446951953614E-18
464	ACKR3	0.01567152483936687	464	ACKR3	0.01567152483936687	0.0	464	CTSH	0.01722356183258698	464	CTSH	0.017223561832586977	3.469446951953614E-18	464	SASH3	0.015213753232922561	464	SASH3	0.015213753232922563	1.734723475976807E-18	464	TMEM138	0.01712035610340695	464	TMEM138	0.01712035610340695	0.0	464	ZNF428	0.01892863903085368	464	ZNF428	0.01892863903085368	0.0	464	PRTN3	0.017482517482517484	464	PRTN3	0.01748251748251748	3.469446951953614E-18
465	ATOH8	0.01567152483936687	465	ATOH8	0.01567152483936687	0.0	465	TK2	0.01722356183258698	465	TK2	0.017223561832586977	3.469446951953614E-18	465	CFLAR	0.015213753232922561	465	CFLAR	0.015213753232922563	1.734723475976807E-18	465	GPR15	0.01712035610340695	465	GPR15	0.01712035610340695	0.0	465	SOAT2	0.01892863903085368	465	SOAT2	0.01892863903085368	0.0	465	CTSK	0.017482517482517484	465	CTSK	0.01748251748251748	3.469446951953614E-18
466	ADCY10	0.01567152483936687	466	ADCY10	0.01567152483936687	0.0	466	THEM6	0.01722356183258698	466	THEM6	0.017223561832586977	3.469446951953614E-18	466	PATL2	0.015213753232922561	466	PATL2	0.015213753232922563	1.734723475976807E-18	466	TREM1	0.01712035610340695	466	TREM1	0.01712035610340695	0.0	466	THEM6	0.01892863903085368	466	THEM6	0.01892863903085368	0.0	466	CTSE	0.017482517482517484	466	CTSE	0.01748251748251748	3.469446951953614E-18
467	GRID1	0.01567152483936687	467	GRID1	0.01567152483936687	0.0	467	AKAP13	0.01722356183258698	467	AKAP13	0.017223561832586977	3.469446951953614E-18	467	DMXL2	0.015213753232922561	467	DMXL2	0.015213753232922563	1.734723475976807E-18	467	GAS2L1	0.01712035610340695	467	GAS2L1	0.01712035610340695	0.0	467	GABARAP	0.01892863903085368	467	GABARAP	0.01892863903085368	0.0	467	TMEM109	0.017482517482517484	467	TMEM109	0.01748251748251748	3.469446951953614E-18
468	GSG1	0.01567152483936687	468	GSG1	0.01567152483936687	0.0	468	GABARAP	0.01722356183258698	468	GABARAP	0.017223561832586977	3.469446951953614E-18	468	ADAM7	0.015213753232922561	468	ADAM7	0.015213753232922563	1.734723475976807E-18	468	NCOA3	0.01712035610340695	468	NCOA3	0.01712035610340695	0.0	468	LONRF3	0.01892863903085368	468	LONRF3	0.01892863903085368	0.0	468	TRPS1	0.017482517482517484	468	TRPS1	0.01748251748251748	3.469446951953614E-18
469	ABCG2	0.01567152483936687	469	ABCG2	0.01567152483936687	0.0	469	GPRC5A	0.01722356183258698	469	GPRC5A	0.017223561832586977	3.469446951953614E-18	469	SLC22A18	0.015213753232922561	469	SLC22A18	0.015213753232922563	1.734723475976807E-18	469	FGD2	0.01712035610340695	469	FGD2	0.01712035610340695	0.0	469	TMEM63A	0.01892863903085368	469	TMEM63A	0.01892863903085368	0.0	469	TMEM102	0.017482517482517484	469	TMEM102	0.01748251748251748	3.469446951953614E-18
470	FRMPD4	0.01567152483936687	470	FRMPD4	0.01567152483936687	0.0	470	EPS8L3	0.01722356183258698	470	EPS8L3	0.017223561832586977	3.469446951953614E-18	470	SLC22A16	0.015213753232922561	470	SLC22A16	0.015213753232922563	1.734723475976807E-18	470	CELF2	0.01712035610340695	470	CELF2	0.01712035610340695	0.0	470	C8G	0.01892863903085368	470	C8G	0.01892863903085368	0.0	470	SMPDL3A	0.017482517482517484	470	SMPDL3A	0.01748251748251748	3.469446951953614E-18
471	CORO2B	0.01567152483936687	471	CORO2B	0.01567152483936687	0.0	471	LONRF3	0.01722356183258698	471	LONRF3	0.017223561832586977	3.469446951953614E-18	471	GRIK1	0.015213753232922561	471	GRIK1	0.015213753232922563	1.734723475976807E-18	471	AGAP2	0.01712035610340695	471	AGAP2	0.01712035610340695	0.0	471	EGFR	0.01892863903085368	471	EGFR	0.01892863903085368	0.0	471	SYK	0.017482517482517484	471	SYK	0.01748251748251748	3.469446951953614E-18
472	NPNT	0.01567152483936687	472	NPNT	0.01567152483936687	0.0	472	TREML1	0.01722356183258698	472	TREML1	0.017223561832586977	3.469446951953614E-18	472	ACOX1	0.015213753232922561	472	ACOX1	0.015213753232922563	1.734723475976807E-18	472	TM6SF1	0.01712035610340695	472	TM6SF1	0.01712035610340695	0.0	472	ALOX5AP	0.01892863903085368	472	ALOX5AP	0.01892863903085368	0.0	472	INPP5K	0.017482517482517484	472	INPP5K	0.01748251748251748	3.469446951953614E-18
473	SLFN12L	0.01567152483936687	473	SLFN12L	0.01567152483936687	0.0	473	TMEM150B	0.01722356183258698	473	TMEM150B	0.017223561832586977	3.469446951953614E-18	473	CFD	0.015213753232922561	473	CFD	0.015213753232922563	1.734723475976807E-18	473	FBXW5	0.01712035610340695	473	FBXW5	0.01712035610340695	0.0	473	MEF2C	0.01892863903085368	473	MEF2C	0.01892863903085368	0.0	473	APOL3	0.017482517482517484	473	APOL3	0.01748251748251748	3.469446951953614E-18
474	OXTR	0.01567152483936687	474	OXTR	0.01567152483936687	0.0	474	SST	0.01722356183258698	474	SST	0.017223561832586977	3.469446951953614E-18	474	DAGLA	0.015213753232922561	474	DAGLA	0.015213753232922563	1.734723475976807E-18	474	CCRL2	0.01712035610340695	474	CCRL2	0.01712035610340695	0.0	474	CXCR4	0.01892863903085368	474	CXCR4	0.01892863903085368	0.0	474	LXN	0.017482517482517484	474	LXN	0.01748251748251748	3.469446951953614E-18
475	DIRAS3	0.01567152483936687	475	DIRAS3	0.01567152483936687	0.0	475	C8G	0.01722356183258698	475	C8G	0.017223561832586977	3.469446951953614E-18	475	PTK6	0.015213753232922561	475	PTK6	0.015213753232922563	1.734723475976807E-18	475	SLC23A2	0.01712035610340695	475	SLC23A2	0.01712035610340695	0.0	475	ZNF366	0.01892863903085368	475	ZNF366	0.01892863903085368	0.0	475	ITPR2	0.017482517482517484	475	ITPR2	0.01748251748251748	3.469446951953614E-18
476	NCKAP1L	0.01567152483936687	476	NCKAP1L	0.01567152483936687	0.0	476	ALOX5AP	0.01722356183258698	476	ALOX5AP	0.017223561832586977	3.469446951953614E-18	476	NENF	0.015213753232922561	476	NENF	0.015213753232922563	1.734723475976807E-18	476	SLAMF7	0.01712035610340695	476	SLAMF7	0.01712035610340695	0.0	476	IL33	0.01892863903085368	476	IL33	0.01892863903085368	0.0	476	ZNF436	0.017482517482517484	476	ZNF436	0.01748251748251748	3.469446951953614E-18
477	ACTBL2	0.01567152483936687	477	ACTBL2	0.01567152483936687	0.0	477	CTSW	0.01722356183258698	477	CTSW	0.017223561832586977	3.469446951953614E-18	477	CYP17A1	0.015213753232922561	477	CYP17A1	0.015213753232922563	1.734723475976807E-18	477	SLAMF6	0.01712035610340695	477	SLAMF6	0.01712035610340695	0.0	477	NRP1	0.01892863903085368	477	NRP1	0.01892863903085368	0.0	477	LGALS9C	0.017482517482517484	477	LGALS9C	0.01748251748251748	3.469446951953614E-18
478	DOCK2	0.01567152483936687	478	DOCK2	0.01567152483936687	0.0	478	MEF2C	0.01722356183258698	478	MEF2C	0.017223561832586977	3.469446951953614E-18	478	FUT7	0.015213753232922561	478	FUT7	0.015213753232922563	1.734723475976807E-18	478	TGFB2	0.01712035610340695	478	TGFB2	0.01712035610340695	0.0	478	COX14	0.01892863903085368	478	COX14	0.01892863903085368	0.0	478	CARD6	0.017482517482517484	478	CARD6	0.01748251748251748	3.469446951953614E-18
479	LPCAT2	0.01567152483936687	479	LPCAT2	0.01567152483936687	0.0	479	CXCR4	0.01722356183258698	479	CXCR4	0.017223561832586977	3.469446951953614E-18	479	SUN2	0.015213753232922561	479	SUN2	0.015213753232922563	1.734723475976807E-18	479	TGFBR2	0.01712035610340695	479	TGFBR2	0.01712035610340695	0.0	479	ZNFX1	0.01892863903085368	479	ZNFX1	0.01892863903085368	0.0	479	CXCR6	0.017482517482517484	479	CXCR6	0.01748251748251748	3.469446951953614E-18
480	CAPNS2	0.01567152483936687	480	CAPNS2	0.01567152483936687	0.0	480	ZNF366	0.01722356183258698	480	ZNF366	0.017223561832586977	3.469446951953614E-18	480	ADCK2	0.015213753232922561	480	ADCK2	0.015213753232922563	1.734723475976807E-18	480	AP1B1	0.01712035610340695	480	AP1B1	0.01712035610340695	0.0	480	FUT6	0.01892863903085368	480	FUT6	0.01892863903085368	0.0	480	UBA7	0.017482517482517484	480	UBA7	0.01748251748251748	3.469446951953614E-18
481	GJB2	0.01567152483936687	481	GJB2	0.01567152483936687	0.0	481	CATSPER1	0.01722356183258698	481	CATSPER1	0.017223561832586977	3.469446951953614E-18	481	SLFN11	0.015213753232922561	481	SLFN11	0.015213753232922563	1.734723475976807E-18	481	FCRL3	0.01712035610340695	481	FCRL3	0.01712035610340695	0.0	481	FUT3	0.01892863903085368	481	FUT3	0.01892863903085368	0.0	481	ADAMTS9	0.017482517482517484	481	ADAMTS9	0.01748251748251748	3.469446951953614E-18
482	CDK17	0.01567152483936687	482	CDK17	0.01567152483936687	0.0	482	PLEKHO1	0.01722356183258698	482	PLEKHO1	0.017223561832586977	3.469446951953614E-18	482	PRKCH	0.015213753232922561	482	PRKCH	0.015213753232922563	1.734723475976807E-18	482	MAP3K7CL	0.01712035610340695	482	MAP3K7CL	0.01712035610340695	0.0	482	USP20	0.01892863903085368	482	USP20	0.01892863903085368	0.0	482	BTBD19	0.017482517482517484	482	BTBD19	0.01748251748251748	3.469446951953614E-18
483	KLF6	0.01567152483936687	483	KLF6	0.01567152483936687	0.0	483	NRP1	0.01722356183258698	483	NRP1	0.017223561832586977	3.469446951953614E-18	483	PRKCE	0.015213753232922561	483	PRKCE	0.015213753232922563	1.734723475976807E-18	483	TET2	0.01712035610340695	483	TET2	0.01712035610340695	0.0	483	ALS2CL	0.01892863903085368	483	ALS2CL	0.01892863903085368	0.0	483	COTL1	0.017482517482517484	483	COTL1	0.01748251748251748	3.469446951953614E-18
484	KLF5	0.01567152483936687	484	KLF5	0.01567152483936687	0.0	484	C6orf89	0.01722356183258698	484	C6orf89	0.017223561832586977	3.469446951953614E-18	484	CES1	0.015213753232922561	484	CES1	0.015213753232922563	1.734723475976807E-18	484	ZBTB4	0.01712035610340695	484	ZBTB4	0.01712035610340695	0.0	484	CTBS	0.01892863903085368	484	CTBS	0.01892863903085368	0.0	484	TMCC3	0.017482517482517484	484	TMCC3	0.01748251748251748	3.469446951953614E-18
485	PRDM16	0.01567152483936687	485	PRDM16	0.01567152483936687	0.0	485	BRI3BP	0.01722356183258698	485	BRI3BP	0.017223561832586977	3.469446951953614E-18	485	C15orf61	0.015213753232922561	485	C15orf61	0.015213753232922563	1.734723475976807E-18	485	CIITA	0.01712035610340695	485	CIITA	0.01712035610340695	0.0	485	SYTL4	0.01892863903085368	485	SYTL4	0.01892863903085368	0.0	485	EPB41L3	0.017482517482517484	485	EPB41L3	0.01748251748251748	3.469446951953614E-18
486	KLF9	0.01567152483936687	486	KLF9	0.01567152483936687	0.0	486	ADAMTS5	0.01722356183258698	486	ADAMTS5	0.017223561832586977	3.469446951953614E-18	486	FFAR2	0.015213753232922561	486	FFAR2	0.015213753232922563	1.734723475976807E-18	486	MGAT1	0.01712035610340695	486	MGAT1	0.01712035610340695	0.0	486	STRA6	0.01892863903085368	486	STRA6	0.01892863903085368	0.0	486	IL7R	0.017482517482517484	486	IL7R	0.01748251748251748	3.469446951953614E-18
487	FAM216B	0.01567152483936687	487	FAM216B	0.01567152483936687	0.0	487	CTBS	0.01722356183258698	487	CTBS	0.017223561832586977	3.469446951953614E-18	487	TRABD2A	0.015213753232922561	487	TRABD2A	0.015213753232922563	1.734723475976807E-18	487	MGAT2	0.01712035610340695	487	MGAT2	0.01712035610340695	0.0	487	RAMP1	0.01892863903085368	487	RAMP1	0.01892863903085368	0.0	487	CREBL2	0.017482517482517484	487	CREBL2	0.01748251748251748	3.469446951953614E-18
488	P2RY8	0.01567152483936687	488	P2RY8	0.01567152483936687	0.0	488	ARHGEF1	0.01722356183258698	488	ARHGEF1	0.017223561832586977	3.469446951953614E-18	488	CKLF-CMTM1	0.015213753232922561	488	CKLF-CMTM1	0.015213753232922563	1.734723475976807E-18	488	BMF	0.01712035610340695	488	BMF	0.01712035610340695	0.0	488	REV3L	0.01892863903085368	488	REV3L	0.01892863903085368	0.0	488	GPR65	0.017482517482517484	488	GPR65	0.01748251748251748	3.469446951953614E-18
489	MMP28	0.01567152483936687	489	MMP28	0.01567152483936687	0.0	489	RAMP1	0.01722356183258698	489	RAMP1	0.017223561832586977	3.469446951953614E-18	489	ITPR1	0.015213753232922561	489	ITPR1	0.015213753232922563	1.734723475976807E-18	489	IER5L	0.01712035610340695	489	IER5L	0.01712035610340695	0.0	489	SSH1	0.01892863903085368	489	SSH1	0.01892863903085368	0.0	489	UAP1L1	0.017482517482517484	489	UAP1L1	0.01748251748251748	3.469446951953614E-18
490	CPVL	0.01567152483936687	490	CPVL	0.01567152483936687	0.0	490	TMEM229B	0.01722356183258698	490	TMEM229B	0.017223561832586977	3.469446951953614E-18	490	GPER1	0.015213753232922561	490	GPER1	0.015213753232922563	1.734723475976807E-18	490	GLRX	0.01712035610340695	490	GLRX	0.01712035610340695	0.0	490	RNF19B	0.01892863903085368	490	RNF19B	0.01892863903085368	0.0	490	SH3BGRL3	0.017482517482517484	490	SH3BGRL3	0.01748251748251748	3.469446951953614E-18
491	ENDOD1	0.01567152483936687	491	ENDOD1	0.01567152483936687	0.0	491	SSH1	0.01722356183258698	491	SSH1	0.017223561832586977	3.469446951953614E-18	491	C10orf90	0.015213753232922561	491	C10orf90	0.015213753232922563	1.734723475976807E-18	491	CHST11	0.01712035610340695	491	CHST11	0.01712035610340695	0.0	491	SLC41A2	0.01892863903085368	491	SLC41A2	0.01892863903085368	0.0	491	IL10	0.017482517482517484	491	IL10	0.01748251748251748	3.469446951953614E-18
492	LRRC10B	0.01567152483936687	492	LRRC10B	0.01567152483936687	0.0	492	PDGFRL	0.01722356183258698	492	PDGFRL	0.017223561832586977	3.469446951953614E-18	492	MAP3K8	0.015213753232922561	492	MAP3K8	0.015213753232922563	1.734723475976807E-18	492	COL15A1	0.01712035610340695	492	COL15A1	0.01712035610340695	0.0	492	CSF1	0.01892863903085368	492	CSF1	0.01892863903085368	0.0	492	LRRN4	0.017482517482517484	492	LRRN4	0.01748251748251748	3.469446951953614E-18
493	PDE1A	0.01567152483936687	493	PDE1A	0.01567152483936687	0.0	493	RNF19B	0.01722356183258698	493	RNF19B	0.017223561832586977	3.469446951953614E-18	493	HAMP	0.015213753232922561	493	HAMP	0.015213753232922563	1.734723475976807E-18	493	VAMP8	0.01712035610340695	493	VAMP8	0.01712035610340695	0.0	493	CD300LB	0.01892863903085368	493	CD300LB	0.01892863903085368	0.0	493	IL16	0.017482517482517484	493	IL16	0.01748251748251748	3.469446951953614E-18
494	EEPD1	0.01567152483936687	494	EEPD1	0.01567152483936687	0.0	494	SLC41A2	0.01722356183258698	494	SLC41A2	0.017223561832586977	3.469446951953614E-18	494	CYP4F12	0.015213753232922561	494	CYP4F12	0.015213753232922563	1.734723475976807E-18	494	CD5	0.01712035610340695	494	CD5	0.01712035610340695	0.0	494	ERAP1	0.01892863903085368	494	ERAP1	0.01892863903085368	0.0	494	TREML2	0.017482517482517484	494	TREML2	0.01748251748251748	3.469446951953614E-18
495	DEXI	0.01567152483936687	495	DEXI	0.01567152483936687	0.0	495	GPR68	0.01722356183258698	495	GPR68	0.017223561832586977	3.469446951953614E-18	495	MAP3K5	0.015213753232922561	495	MAP3K5	0.015213753232922563	1.734723475976807E-18	495	MMP7	0.01712035610340695	495	MMP7	0.01712035610340695	0.0	495	HSPB7	0.01892863903085368	495	HSPB7	0.01892863903085368	0.0	495	STX12	0.017482517482517484	495	STX12	0.01748251748251748	3.469446951953614E-18
496	PEAR1	0.01567152483936687	496	PEAR1	0.01567152483936687	0.0	496	CD300LB	0.01722356183258698	496	CD300LB	0.017223561832586977	3.469446951953614E-18	496	ZNF575	0.015213753232922561	496	ZNF575	0.015213753232922563	1.734723475976807E-18	496	LY86	0.01712035610340695	496	LY86	0.01712035610340695	0.0	496	ANXA2	0.01892863903085368	496	ANXA2	0.01892863903085368	0.0	496	ZMIZ1	0.017482517482517484	496	ZMIZ1	0.01748251748251748	3.469446951953614E-18
497	LRRC43	0.01567152483936687	497	LRRC43	0.01567152483936687	0.0	497	HSPB7	0.01722356183258698	497	HSPB7	0.017223561832586977	3.469446951953614E-18	497	GDPGP1	0.015213753232922561	497	GDPGP1	0.015213753232922563	1.734723475976807E-18	497	CTSS	0.01712035610340695	497	CTSS	0.01712035610340695	0.0	497	LAMB3	0.01892863903085368	497	LAMB3	0.01892863903085368	0.0	497	LIPA	0.017482517482517484	497	LIPA	0.01748251748251748	3.469446951953614E-18
498	IKBKE	0.01567152483936687	498	IKBKE	0.01567152483936687	0.0	498	TREM2	0.01722356183258698	498	TREM2	0.017223561832586977	3.469446951953614E-18	498	TPGS1	0.015213753232922561	498	TPGS1	0.015213753232922563	1.734723475976807E-18	498	IL24	0.01712035610340695	498	IL24	0.01712035610340695	0.0	498	WNT3	0.01892863903085368	498	WNT3	0.01892863903085368	0.0	498	BIRC7	0.017482517482517484	498	BIRC7	0.01748251748251748	3.469446951953614E-18
499	UBXN11	0.01567152483936687	499	UBXN11	0.01567152483936687	0.0	499	ANXA2	0.01722356183258698	499	ANXA2	0.017223561832586977	3.469446951953614E-18	499	CTSK	0.015213753232922561	499	CTSK	0.015213753232922563	1.734723475976807E-18	499	AXL	0.01712035610340695	499	AXL	0.01712035610340695	0.0	499	LAYN	0.01892863903085368	499	LAYN	0.01892863903085368	0.0	499	CD6	0.017482517482517484	499	CD6	0.01748251748251748	3.469446951953614E-18
500	TEX26	0.01567152483936687	500	TEX26	0.01567152483936687	0.0	500	LAMB3	0.01722356183258698	500	LAMB3	0.017223561832586977	3.469446951953614E-18	500	TNFRSF6B	0.015213753232922561	500	TNFRSF6B	0.015213753232922563	1.734723475976807E-18	500	FMNL3	0.01712035610340695	500	FMNL3	0.01712035610340695	0.0	500	ANXA9	0.01892863903085368	500	ANXA9	0.01892863903085368	0.0	500	TNFSF12-TNFSF13	0.017482517482517484	500	TNFSF12-TNFSF13	0.01748251748251748	3.469446951953614E-18
501	GINM1	0.01567152483936687	501	GINM1	0.01567152483936687	0.0	501	LAYN	0.01722356183258698	501	LAYN	0.017223561832586977	3.469446951953614E-18	501	FMO4	0.015213753232922561	501	FMO4	0.015213753232922563	1.734723475976807E-18	501	ATP6AP1	0.01712035610340695	501	ATP6AP1	0.01712035610340695	0.0	501	SIRPG	0.01892863903085368	501	SIRPG	0.01892863903085368	0.0	501	P2RX4	0.017482517482517484	501	P2RX4	0.01748251748251748	3.469446951953614E-18
502	NABP1	0.01567152483936687	502	NABP1	0.01567152483936687	0.0	502	SIRPG	0.01722356183258698	502	SIRPG	0.017223561832586977	3.469446951953614E-18	502	SMCO4	0.015213753232922561	502	SMCO4	0.015213753232922563	1.734723475976807E-18	502	CBFA2T3	0.01712035610340695	502	CBFA2T3	0.01712035610340695	0.0	502	GPR160	0.01892863903085368	502	GPR160	0.01892863903085368	0.0	502	DPP9	0.017482517482517484	502	DPP9	0.01748251748251748	3.469446951953614E-18
503	CCDC152	0.01567152483936687	503	CCDC152	0.01567152483936687	0.0	503	GPR160	0.01722356183258698	503	GPR160	0.017223561832586977	3.469446951953614E-18	503	KCNAB1	0.015213753232922561	503	KCNAB1	0.015213753232922563	1.734723475976807E-18	503	ATP6AP2	0.01712035610340695	503	ATP6AP2	0.01712035610340695	0.0	503	TGFB1	0.01892863903085368	503	TGFB1	0.01892863903085368	0.0	503	ANXA5	0.017482517482517484	503	ANXA5	0.01748251748251748	3.469446951953614E-18
504	LRRC4C	0.01567152483936687	504	LRRC4C	0.01567152483936687	0.0	504	TGFB1	0.01722356183258698	504	TGFB1	0.017223561832586977	3.469446951953614E-18	504	CTSE	0.015213753232922561	504	CTSE	0.015213753232922563	1.734723475976807E-18	504	ANKRD44	0.01712035610340695	504	ANKRD44	0.01712035610340695	0.0	504	G0S2	0.01892863903085368	504	G0S2	0.01892863903085368	0.0	504	ANXA4	0.017482517482517484	504	ANXA4	0.01748251748251748	3.469446951953614E-18
505	SLC2A6	0.01567152483936687	505	SLC2A6	0.01567152483936687	0.0	505	G0S2	0.01722356183258698	505	G0S2	0.017223561832586977	3.469446951953614E-18	505	TMEM109	0.015213753232922561	505	TMEM109	0.015213753232922563	1.734723475976807E-18	505	CRYL1	0.01712035610340695	505	CRYL1	0.01712035610340695	0.0	505	SHE	0.01892863903085368	505	SHE	0.01892863903085368	0.0	505	SAMHD1	0.017482517482517484	505	SAMHD1	0.01748251748251748	3.469446951953614E-18
506	DYNLT3	0.01567152483936687	506	DYNLT3	0.01567152483936687	0.0	506	ANPEP	0.01722356183258698	506	ANPEP	0.017223561832586977	3.469446951953614E-18	506	TRPS1	0.015213753232922561	506	TRPS1	0.015213753232922563	1.734723475976807E-18	506	JAK1	0.01712035610340695	506	JAK1	0.01712035610340695	0.0	506	GLTPD2	0.01892863903085368	506	GLTPD2	0.01892863903085368	0.0	506	RNFT1	0.017482517482517484	506	RNFT1	0.01748251748251748	3.469446951953614E-18
507	ME1	0.01567152483936687	507	ME1	0.01567152483936687	0.0	507	TIFA	0.01722356183258698	507	TIFA	0.017223561832586977	3.469446951953614E-18	507	TMEM102	0.015213753232922561	507	TMEM102	0.015213753232922563	1.734723475976807E-18	507	AQP9	0.01712035610340695	507	AQP9	0.01712035610340695	0.0	507	ALDH1A2	0.01892863903085368	507	ALDH1A2	0.01892863903085368	0.0	507	CD79A	0.017482517482517484	507	CD79A	0.01748251748251748	3.469446951953614E-18
508	TNFAIP8L2	0.01567152483936687	508	TNFAIP8L2	0.01567152483936687	0.0	508	SHE	0.01722356183258698	508	SHE	0.017223561832586977	3.469446951953614E-18	508	SMPDL3A	0.015213753232922561	508	SMPDL3A	0.015213753232922563	1.734723475976807E-18	508	CCL20	0.01712035610340695	508	CCL20	0.01712035610340695	0.0	508	ANXA1	0.01892863903085368	508	ANXA1	0.01892863903085368	0.0	508	TIMP4	0.017482517482517484	508	TIMP4	0.01748251748251748	3.469446951953614E-18
509	NCSTN	0.01567152483936687	509	NCSTN	0.01567152483936687	0.0	509	GLTPD2	0.01722356183258698	509	GLTPD2	0.017223561832586977	3.469446951953614E-18	509	SYK	0.015213753232922561	509	SYK	0.015213753232922563	1.734723475976807E-18	509	ALPK1	0.01712035610340695	509	ALPK1	0.01712035610340695	0.0	509	TREML4	0.01892863903085368	509	TREML4	0.01892863903085368	0.0	509	TIMP3	0.017482517482517484	509	TIMP3	0.01748251748251748	3.469446951953614E-18
510	DNASE2B	0.01567152483936687	510	DNASE2B	0.01567152483936687	0.0	510	PLA2G15	0.01722356183258698	510	PLA2G15	0.017223561832586977	3.469446951953614E-18	510	APOL3	0.015213753232922561	510	APOL3	0.015213753232922563	1.734723475976807E-18	510	DOCK8	0.01712035610340695	510	DOCK8	0.01712035610340695	0.0	510	TREM1	0.01892863903085368	510	TREM1	0.01892863903085368	0.0	510	LEPROT	0.017482517482517484	510	LEPROT	0.01748251748251748	3.469446951953614E-18
511	ADAMTSL5	0.01567152483936687	511	ADAMTSL5	0.01567152483936687	0.0	511	ANXA1	0.01722356183258698	511	ANXA1	0.017223561832586977	3.469446951953614E-18	511	LXN	0.015213753232922561	511	LXN	0.015213753232922563	1.734723475976807E-18	511	KIFAP3	0.01712035610340695	511	KIFAP3	0.01712035610340695	0.0	511	LUM	0.01892863903085368	511	LUM	0.01892863903085368	0.0	511	SELPLG	0.017482517482517484	511	SELPLG	0.01748251748251748	3.469446951953614E-18
512	AKR1C4	0.01567152483936687	512	AKR1C4	0.01567152483936687	0.0	512	TREML4	0.01722356183258698	512	TREML4	0.017223561832586977	3.469446951953614E-18	512	ZNF436	0.015213753232922561	512	ZNF436	0.015213753232922563	1.734723475976807E-18	512	C2CD2L	0.01712035610340695	512	C2CD2L	0.01712035610340695	0.0	512	MYH9	0.01892863903085368	512	MYH9	0.01892863903085368	0.0	512	DENND2D	0.017482517482517484	512	DENND2D	0.01748251748251748	3.469446951953614E-18
513	CEACAM4	0.01567152483936687	513	CEACAM4	0.01567152483936687	0.0	513	TREM1	0.01722356183258698	513	TREM1	0.017223561832586977	3.469446951953614E-18	513	TRAF3IP3	0.015213753232922561	513	TRAF3IP3	0.015213753232922563	1.734723475976807E-18	513	ADORA3	0.01712035610340695	513	ADORA3	0.01712035610340695	0.0	513	FGD2	0.01892863903085368	513	FGD2	0.01892863903085368	0.0	513	RNASEK	0.017482517482517484	513	RNASEK	0.01748251748251748	3.469446951953614E-18
514	LRRTM2	0.01567152483936687	514	LRRTM2	0.01567152483936687	0.0	514	LUM	0.01722356183258698	514	LUM	0.017223561832586977	3.469446951953614E-18	514	TEKT1	0.015213753232922561	514	TEKT1	0.015213753232922563	1.734723475976807E-18	514	TNRC18	0.01712035610340695	514	TNRC18	0.01712035610340695	0.0	514	TM6SF1	0.01892863903085368	514	TM6SF1	0.01892863903085368	0.0	514	RNASEL	0.017482517482517484	514	RNASEL	0.01748251748251748	3.469446951953614E-18
515	ANGPT1	0.01567152483936687	515	ANGPT1	0.01567152483936687	0.0	515	GAS2L1	0.01722356183258698	515	GAS2L1	0.017223561832586977	3.469446951953614E-18	515	TIAM1	0.015213753232922561	515	TIAM1	0.015213753232922563	1.734723475976807E-18	515	PARP9	0.01712035610340695	515	PARP9	0.01712035610340695	0.0	515	SLAMF7	0.01892863903085368	515	SLAMF7	0.01892863903085368	0.0	515	WHAMM	0.017482517482517484	515	WHAMM	0.01748251748251748	3.469446951953614E-18
516	TLDC2	0.01567152483936687	516	TLDC2	0.01567152483936687	0.0	516	NCOA3	0.01722356183258698	516	NCOA3	0.017223561832586977	3.469446951953614E-18	516	LGALS9C	0.015213753232922561	516	LGALS9C	0.015213753232922563	1.734723475976807E-18	516	CCR3	0.01712035610340695	516	CCR3	0.01712035610340695	0.0	516	TGFB2	0.01892863903085368	516	TGFB2	0.01892863903085368	0.0	516	LY9	0.017482517482517484	516	LY9	0.01748251748251748	3.469446951953614E-18
517	PLEK2	0.01567152483936687	517	PLEK2	0.01567152483936687	0.0	517	GABRG2	0.01722356183258698	517	GABRG2	0.017223561832586977	3.469446951953614E-18	517	RNF144B	0.015213753232922561	517	RNF144B	0.015213753232922563	1.734723475976807E-18	517	IL13RA1	0.01712035610340695	517	IL13RA1	0.01712035610340695	0.0	517	TGFBR2	0.01892863903085368	517	TGFBR2	0.01892863903085368	0.0	517	KCNN4	0.017482517482517484	517	KCNN4	0.01748251748251748	3.469446951953614E-18
518	SCD5	0.01567152483936687	518	SCD5	0.01567152483936687	0.0	518	FGD2	0.01722356183258698	518	FGD2	0.017223561832586977	3.469446951953614E-18	518	CARD6	0.015213753232922561	518	CARD6	0.015213753232922563	1.734723475976807E-18	518	CST6	0.01712035610340695	518	CST6	0.01712035610340695	0.0	518	SH3RF2	0.01892863903085368	518	SH3RF2	0.01892863903085368	0.0	518	LYN	0.017482517482517484	518	LYN	0.01748251748251748	3.469446951953614E-18
519	PCDH15	0.01567152483936687	519	PCDH15	0.01567152483936687	0.0	519	CELF2	0.01722356183258698	519	CELF2	0.017223561832586977	3.469446951953614E-18	519	CXCR6	0.015213753232922561	519	CXCR6	0.015213753232922563	1.734723475976807E-18	519	KLRF1	0.01712035610340695	519	KLRF1	0.01712035610340695	0.0	519	AP1B1	0.01892863903085368	519	AP1B1	0.01892863903085368	0.0	519	FBXL8	0.017482517482517484	519	FBXL8	0.01748251748251748	3.469446951953614E-18
520	KRT75	0.01567152483936687	520	KRT75	0.01567152483936687	0.0	520	AGAP2	0.01722356183258698	520	AGAP2	0.017223561832586977	3.469446951953614E-18	520	GFOD1	0.015213753232922561	520	GFOD1	0.015213753232922563	1.734723475976807E-18	520	SLC10A1	0.01712035610340695	520	SLC10A1	0.01712035610340695	0.0	520	MAP3K7CL	0.01892863903085368	520	MAP3K7CL	0.01892863903085368	0.0	520	KIAA0930	0.017482517482517484	520	KIAA0930	0.01748251748251748	3.469446951953614E-18
521	PSMB10	0.01567152483936687	521	PSMB10	0.01567152483936687	0.0	521	TM6SF1	0.01722356183258698	521	TM6SF1	0.017223561832586977	3.469446951953614E-18	521	WWOX	0.015213753232922561	521	WWOX	0.015213753232922563	1.734723475976807E-18	521	CEACAM21	0.01712035610340695	521	CEACAM21	0.01712035610340695	0.0	521	TET2	0.01892863903085368	521	TET2	0.01892863903085368	0.0	521	DOK1	0.017482517482517484	521	DOK1	0.01748251748251748	3.469446951953614E-18
522	FAM81A	0.01567152483936687	522	FAM81A	0.01567152483936687	0.0	522	FBXW5	0.01722356183258698	522	FBXW5	0.017223561832586977	3.469446951953614E-18	522	UBA7	0.015213753232922561	522	UBA7	0.015213753232922563	1.734723475976807E-18	522	CORO1A	0.01712035610340695	522	CORO1A	0.01712035610340695	0.0	522	GLRB	0.01892863903085368	522	GLRB	0.01892863903085368	0.0	522	ISLR	0.017482517482517484	522	ISLR	0.01748251748251748	3.469446951953614E-18
523	HAAO	0.01567152483936687	523	HAAO	0.01567152483936687	0.0	523	CCRL2	0.01722356183258698	523	CCRL2	0.017223561832586977	3.469446951953614E-18	523	BTBD19	0.015213753232922561	523	BTBD19	0.015213753232922563	1.734723475976807E-18	523	DCLRE1C	0.01712035610340695	523	DCLRE1C	0.01712035610340695	0.0	523	BMF	0.01892863903085368	523	BMF	0.01892863903085368	0.0	523	ZADH2	0.017482517482517484	523	ZADH2	0.01748251748251748	3.469446951953614E-18
524	SLC1A2	0.01567152483936687	524	SLC1A2	0.01567152483936687	0.0	524	SLC23A2	0.01722356183258698	524	SLC23A2	0.017223561832586977	3.469446951953614E-18	524	KRT4	0.015213753232922561	524	KRT4	0.015213753232922563	1.734723475976807E-18	524	MLLT6	0.01712035610340695	524	MLLT6	0.01712035610340695	0.0	524	IER5L	0.01892863903085368	524	IER5L	0.01892863903085368	0.0	524	ADAMDEC1	0.017482517482517484	524	ADAMDEC1	0.01748251748251748	3.469446951953614E-18
525	ITGBL1	0.01567152483936687	525	ITGBL1	0.01567152483936687	0.0	525	SLAMF7	0.01722356183258698	525	SLAMF7	0.017223561832586977	3.469446951953614E-18	525	TMCC3	0.015213753232922561	525	TMCC3	0.015213753232922563	1.734723475976807E-18	525	MRGPRE	0.01712035610340695	525	MRGPRE	0.01712035610340695	0.0	525	GLRX	0.01892863903085368	525	GLRX	0.01892863903085368	0.0	525	TLR6	0.017482517482517484	525	TLR6	0.01748251748251748	3.469446951953614E-18
526	OSTM1	0.01567152483936687	526	OSTM1	0.01567152483936687	0.0	526	SLAMF6	0.01722356183258698	526	SLAMF6	0.017223561832586977	3.469446951953614E-18	526	GSDMC	0.015213753232922561	526	GSDMC	0.015213753232922563	1.734723475976807E-18	526	AP4E1	0.01712035610340695	526	AP4E1	0.01712035610340695	0.0	526	TBKBP1	0.01892863903085368	526	TBKBP1	0.01892863903085368	0.0	526	TRAK2	0.017482517482517484	526	TRAK2	0.01748251748251748	3.469446951953614E-18
527	DAW1	0.01567152483936687	527	DAW1	0.01567152483936687	0.0	527	TGFB2	0.01722356183258698	527	TGFB2	0.017223561832586977	3.469446951953614E-18	527	EPB41L3	0.015213753232922561	527	EPB41L3	0.015213753232922563	1.734723475976807E-18	527	CASP8	0.01712035610340695	527	CASP8	0.01712035610340695	0.0	527	CHST11	0.01892863903085368	527	CHST11	0.01892863903085368	0.0	527	NFKBIA	0.017482517482517484	527	NFKBIA	0.01748251748251748	3.469446951953614E-18
528	ALPK2	0.01567152483936687	528	ALPK2	0.01567152483936687	0.0	528	C17orf99	0.01722356183258698	528	C17orf99	0.017223561832586977	3.469446951953614E-18	528	IL7R	0.015213753232922561	528	IL7R	0.015213753232922563	1.734723475976807E-18	528	PURA	0.01712035610340695	528	PURA	0.01712035610340695	0.0	528	VAMP5	0.01892863903085368	528	VAMP5	0.01892863903085368	0.0	528	CYTIP	0.017482517482517484	528	CYTIP	0.01748251748251748	3.469446951953614E-18
529	S1PR1	0.01567152483936687	529	S1PR1	0.01567152483936687	0.0	529	TGFBR2	0.01722356183258698	529	TGFBR2	0.017223561832586977	3.469446951953614E-18	529	CREBL2	0.015213753232922561	529	CREBL2	0.015213753232922563	1.734723475976807E-18	529	BCL2	0.01712035610340695	529	BCL2	0.01712035610340695	0.0	529	EBF2	0.01892863903085368	529	EBF2	0.01892863903085368	0.0	529	TMEM119	0.017482517482517484	529	TMEM119	0.01748251748251748	3.469446951953614E-18
530	SASH3	0.01567152483936687	530	SASH3	0.01567152483936687	0.0	530	TGFBR1	0.01722356183258698	530	TGFBR1	0.017223561832586977	3.469446951953614E-18	530	GPR65	0.015213753232922561	530	GPR65	0.015213753232922563	1.734723475976807E-18	530	MAN2B2	0.01712035610340695	530	MAN2B2	0.01712035610340695	0.0	530	COL15A1	0.01892863903085368	530	COL15A1	0.01892863903085368	0.0	530	RNH1	0.017482517482517484	530	RNH1	0.01748251748251748	3.469446951953614E-18
531	CFLAR	0.01567152483936687	531	CFLAR	0.01567152483936687	0.0	531	AP1B1	0.01722356183258698	531	AP1B1	0.017223561832586977	3.469446951953614E-18	531	UAP1L1	0.015213753232922561	531	UAP1L1	0.015213753232922563	1.734723475976807E-18	531	PLK3	0.01712035610340695	531	PLK3	0.01712035610340695	0.0	531	VAMP8	0.01892863903085368	531	VAMP8	0.01892863903085368	0.0	531	LRRC63	0.017482517482517484	531	LRRC63	0.01748251748251748	3.469446951953614E-18
532	FDCSP	0.01567152483936687	532	FDCSP	0.01567152483936687	0.0	532	MAP3K7CL	0.01722356183258698	532	MAP3K7CL	0.017223561832586977	3.469446951953614E-18	532	SH3BGRL3	0.015213753232922561	532	SH3BGRL3	0.015213753232922563	1.734723475976807E-18	532	CIB1	0.01712035610340695	532	CIB1	0.01712035610340695	0.0	532	MMP7	0.01892863903085368	532	MMP7	0.01892863903085368	0.0	532	DPEP2	0.017482517482517484	532	DPEP2	0.01748251748251748	3.469446951953614E-18
533	SLC22A18	0.01567152483936687	533	SLC22A18	0.01567152483936687	0.0	533	TET2	0.01722356183258698	533	TET2	0.017223561832586977	3.469446951953614E-18	533	IL10	0.015213753232922561	533	IL10	0.015213753232922563	1.734723475976807E-18	533	PDE7B	0.01712035610340695	533	PDE7B	0.01712035610340695	0.0	533	SLC6A9	0.01892863903085368	533	SLC6A9	0.01892863903085368	0.0	533	CD44	0.017482517482517484	533	CD44	0.01748251748251748	3.469446951953614E-18
534	GRIK1	0.01567152483936687	534	GRIK1	0.01567152483936687	0.0	534	CIITA	0.01722356183258698	534	CIITA	0.017223561832586977	3.469446951953614E-18	534	IL16	0.015213753232922561	534	IL16	0.015213753232922563	1.734723475976807E-18	534	SERPINB1	0.01712035610340695	534	SERPINB1	0.01712035610340695	0.0	534	FCHO2	0.01892863903085368	534	FCHO2	0.01892863903085368	0.0	534	UBXN6	0.017482517482517484	534	UBXN6	0.01748251748251748	3.469446951953614E-18
535	CFD	0.01567152483936687	535	CFD	0.01567152483936687	0.0	535	MGAT1	0.01722356183258698	535	MGAT1	0.017223561832586977	3.469446951953614E-18	535	TREML2	0.015213753232922561	535	TREML2	0.015213753232922563	1.734723475976807E-18	535	FCRL4	0.01712035610340695	535	FCRL4	0.01712035610340695	0.0	535	CTSS	0.01892863903085368	535	CTSS	0.01892863903085368	0.0	535	IFI6	0.017482517482517484	535	IFI6	0.01748251748251748	3.469446951953614E-18
536	NENF	0.01567152483936687	536	NENF	0.01567152483936687	0.0	536	BMF	0.01722356183258698	536	BMF	0.017223561832586977	3.469446951953614E-18	536	STX12	0.015213753232922561	536	STX12	0.015213753232922563	1.734723475976807E-18	536	NEDD9	0.01712035610340695	536	NEDD9	0.01712035610340695	0.0	536	ATP6AP1	0.01892863903085368	536	ATP6AP1	0.01892863903085368	0.0	536	PIK3R5	0.017482517482517484	536	PIK3R5	0.01748251748251748	3.469446951953614E-18
537	FUT7	0.01567152483936687	537	FUT7	0.01567152483936687	0.0	537	IER5L	0.01722356183258698	537	IER5L	0.017223561832586977	3.469446951953614E-18	537	LIPA	0.015213753232922561	537	LIPA	0.015213753232922563	1.734723475976807E-18	537	ANKRD55	0.01712035610340695	537	ANKRD55	0.01712035610340695	0.0	537	WLS	0.01892863903085368	537	WLS	0.01892863903085368	0.0	537	CD300A	0.017482517482517484	537	CD300A	0.01748251748251748	3.469446951953614E-18
538	ELAC1	0.01567152483936687	538	ELAC1	0.01567152483936687	0.0	538	GLRX	0.01722356183258698	538	GLRX	0.017223561832586977	3.469446951953614E-18	538	HS1BP3	0.015213753232922561	538	HS1BP3	0.015213753232922563	1.734723475976807E-18	538	SPRYD3	0.01712035610340695	538	SPRYD3	0.01712035610340695	0.0	538	ANKRD44	0.01892863903085368	538	ANKRD44	0.01892863903085368	0.0	538	PRPH	0.017482517482517484	538	PRPH	0.01748251748251748	3.469446951953614E-18
539	SUN2	0.01567152483936687	539	SUN2	0.01567152483936687	0.0	539	CHST11	0.01722356183258698	539	CHST11	0.017223561832586977	3.469446951953614E-18	539	BIRC7	0.015213753232922561	539	BIRC7	0.015213753232922563	1.734723475976807E-18	539	PKIB	0.01712035610340695	539	PKIB	0.01712035610340695	0.0	539	CRYL1	0.01892863903085368	539	CRYL1	0.01892863903085368	0.0	539	TNFAIP3	0.017482517482517484	539	TNFAIP3	0.01748251748251748	3.469446951953614E-18
540	ADCK2	0.01567152483936687	540	ADCK2	0.01567152483936687	0.0	540	COL15A1	0.01722356183258698	540	COL15A1	0.017223561832586977	3.469446951953614E-18	540	CD6	0.015213753232922561	540	CD6	0.015213753232922563	1.734723475976807E-18	540	ST18	0.01712035610340695	540	ST18	0.01712035610340695	0.0	540	JAK1	0.01892863903085368	540	JAK1	0.01892863903085368	0.0	540	XPNPEP2	0.017482517482517484	540	XPNPEP2	0.01748251748251748	3.469446951953614E-18
541	SLFN11	0.01567152483936687	541	SLFN11	0.01567152483936687	0.0	541	VAMP8	0.01722356183258698	541	VAMP8	0.017223561832586977	3.469446951953614E-18	541	GNAT2	0.015213753232922561	541	GNAT2	0.015213753232922563	1.734723475976807E-18	541	KLHDC1	0.01712035610340695	541	KLHDC1	0.01712035610340695	0.0	541	AQP9	0.01892863903085368	541	AQP9	0.01892863903085368	0.0	541	ELOVL1	0.017482517482517484	541	ELOVL1	0.01748251748251748	3.469446951953614E-18
542	PRKCE	0.01567152483936687	542	PRKCE	0.01567152483936687	0.0	542	CD5	0.01722356183258698	542	CD5	0.017223561832586977	3.469446951953614E-18	542	TNFSF12-TNFSF13	0.015213753232922561	542	TNFSF12-TNFSF13	0.015213753232922563	1.734723475976807E-18	542	ARRDC5	0.01712035610340695	542	ARRDC5	0.01712035610340695	0.0	542	MORN3	0.01892863903085368	542	MORN3	0.01892863903085368	0.0	542	BAIAP2	0.017482517482517484	542	BAIAP2	0.01748251748251748	3.469446951953614E-18
543	C15orf61	0.01567152483936687	543	C15orf61	0.01567152483936687	0.0	543	MMP7	0.01722356183258698	543	MMP7	0.017223561832586977	3.469446951953614E-18	543	P2RX4	0.015213753232922561	543	P2RX4	0.015213753232922563	1.734723475976807E-18	543	ZZEF1	0.01712035610340695	543	ZZEF1	0.01712035610340695	0.0	543	ADCY9	0.01892863903085368	543	ADCY9	0.01892863903085368	0.0	543	DTX3L	0.017482517482517484	543	DTX3L	0.01748251748251748	3.469446951953614E-18
544	FFAR2	0.01567152483936687	544	FFAR2	0.01567152483936687	0.0	544	LY86	0.01722356183258698	544	LY86	0.017223561832586977	3.469446951953614E-18	544	ANXA4	0.015213753232922561	544	ANXA4	0.015213753232922563	1.734723475976807E-18	544	TNFSF13B	0.01712035610340695	544	TNFSF13B	0.01712035610340695	0.0	544	SPESP1	0.01892863903085368	544	SPESP1	0.01892863903085368	0.0	544	FOXP2	0.017482517482517484	544	FOXP2	0.01748251748251748	3.469446951953614E-18
545	TRABD2A	0.01567152483936687	545	TRABD2A	0.01567152483936687	0.0	545	CTSS	0.01722356183258698	545	CTSS	0.017223561832586977	3.469446951953614E-18	545	COQ10B	0.015213753232922561	545	COQ10B	0.015213753232922563	1.734723475976807E-18	545	SIRT2	0.01712035610340695	545	SIRT2	0.01712035610340695	0.0	545	ZBTB20	0.01892863903085368	545	ZBTB20	0.01892863903085368	0.0	545	TNC	0.017482517482517484	545	TNC	0.01748251748251748	3.469446951953614E-18
546	CKLF-CMTM1	0.01567152483936687	546	CKLF-CMTM1	0.01567152483936687	0.0	546	IL24	0.01722356183258698	546	IL24	0.017223561832586977	3.469446951953614E-18	546	SAMHD1	0.015213753232922561	546	SAMHD1	0.015213753232922563	1.734723475976807E-18	546	NCF2	0.01712035610340695	546	NCF2	0.01712035610340695	0.0	546	ALPK1	0.01892863903085368	546	ALPK1	0.01892863903085368	0.0	546	EVI2A	0.017482517482517484	546	EVI2A	0.01748251748251748	3.469446951953614E-18
547	MFRP	0.01567152483936687	547	MFRP	0.01567152483936687	0.0	547	AXL	0.01722356183258698	547	AXL	0.017223561832586977	3.469446951953614E-18	547	PCP2	0.015213753232922561	547	PCP2	0.015213753232922563	1.734723475976807E-18	547	FNBP1	0.01712035610340695	547	FNBP1	0.01712035610340695	0.0	547	DOCK8	0.01892863903085368	547	DOCK8	0.01892863903085368	0.0	547	NDP	0.017482517482517484	547	NDP	0.01748251748251748	3.469446951953614E-18
548	GPER1	0.01567152483936687	548	GPER1	0.01567152483936687	0.0	548	CCL28	0.01722356183258698	548	CCL28	0.017223561832586977	3.469446951953614E-18	548	RNFT1	0.015213753232922561	548	RNFT1	0.015213753232922563	1.734723475976807E-18	548	ERMN	0.01712035610340695	548	ERMN	0.01712035610340695	0.0	548	DOCK9	0.01892863903085368	548	DOCK9	0.01892863903085368	0.0	548	ST3GAL6	0.017482517482517484	548	ST3GAL6	0.01748251748251748	3.469446951953614E-18
549	C10orf90	0.01567152483936687	549	C10orf90	0.01567152483936687	0.0	549	FMNL3	0.01722356183258698	549	FMNL3	0.017223561832586977	3.469446951953614E-18	549	CD79A	0.015213753232922561	549	CD79A	0.015213753232922563	1.734723475976807E-18	549	TLR10	0.01712035610340695	549	TLR10	0.01712035610340695	0.0	549	C2CD2L	0.01892863903085368	549	C2CD2L	0.01892863903085368	0.0	549	GBGT1	0.017482517482517484	549	GBGT1	0.01748251748251748	3.469446951953614E-18
550	MYZAP	0.01567152483936687	550	MYZAP	0.01567152483936687	0.0	550	ATP6AP1	0.01722356183258698	550	ATP6AP1	0.017223561832586977	3.469446951953614E-18	550	TIMP4	0.015213753232922561	550	TIMP4	0.015213753232922563	1.734723475976807E-18	550	TBC1D9	0.01712035610340695	550	TBC1D9	0.01712035610340695	0.0	550	ACSBG2	0.01892863903085368	550	ACSBG2	0.01892863903085368	0.0	550	SIL1	0.017482517482517484	550	SIL1	0.01748251748251748	3.469446951953614E-18
551	MAP3K8	0.01567152483936687	551	MAP3K8	0.01567152483936687	0.0	551	CBFA2T3	0.01722356183258698	551	CBFA2T3	0.017223561832586977	3.469446951953614E-18	551	TIMP3	0.015213753232922561	551	TIMP3	0.015213753232922563	1.734723475976807E-18	551	SUCNR1	0.01712035610340695	551	SUCNR1	0.01712035610340695	0.0	551	SLC9A7	0.01892863903085368	551	SLC9A7	0.01892863903085368	0.0	551	ADTRP	0.017482517482517484	551	ADTRP	0.01748251748251748	3.469446951953614E-18
552	HAMP	0.01567152483936687	552	HAMP	0.01567152483936687	0.0	552	ATP6AP2	0.01722356183258698	552	ATP6AP2	0.017223561832586977	3.469446951953614E-18	552	USH2A	0.015213753232922561	552	USH2A	0.015213753232922563	1.734723475976807E-18	552	COL9A2	0.01712035610340695	552	COL9A2	0.01712035610340695	0.0	552	SLC9A3	0.01892863903085368	552	SLC9A3	0.01892863903085368	0.0	552	SYNGR2	0.017482517482517484	552	SYNGR2	0.01748251748251748	3.469446951953614E-18
553	CCDC96	0.01567152483936687	553	CCDC96	0.01567152483936687	0.0	553	ANKRD44	0.01722356183258698	553	ANKRD44	0.017223561832586977	3.469446951953614E-18	553	LEPROT	0.015213753232922561	553	LEPROT	0.015213753232922563	1.734723475976807E-18	553	UNC13D	0.01712035610340695	553	UNC13D	0.01712035610340695	0.0	553	TNRC18	0.01892863903085368	553	TNRC18	0.01892863903085368	0.0	553	CLEC12A	0.017482517482517484	553	CLEC12A	0.01748251748251748	3.469446951953614E-18
554	MAP3K5	0.01567152483936687	554	MAP3K5	0.01567152483936687	0.0	554	CRYL1	0.01722356183258698	554	CRYL1	0.017223561832586977	3.469446951953614E-18	554	SELPLG	0.015213753232922561	554	SELPLG	0.015213753232922563	1.734723475976807E-18	554	VCAM1	0.01712035610340695	554	VCAM1	0.01712035610340695	0.0	554	C16orf86	0.01892863903085368	554	C16orf86	0.01892863903085368	0.0	554	PRR5L	0.017482517482517484	554	PRR5L	0.01748251748251748	3.469446951953614E-18
555	ZNF575	0.01567152483936687	555	ZNF575	0.01567152483936687	0.0	555	JAK1	0.01722356183258698	555	JAK1	0.017223561832586977	3.469446951953614E-18	555	NHLRC1	0.015213753232922561	555	NHLRC1	0.015213753232922563	1.734723475976807E-18	555	EMP1	0.01712035610340695	555	EMP1	0.01712035610340695	0.0	555	PARP9	0.01892863903085368	555	PARP9	0.01892863903085368	0.0	555	CPED1	0.017482517482517484	555	CPED1	0.01748251748251748	3.469446951953614E-18
556	TPGS1	0.01567152483936687	556	TPGS1	0.01567152483936687	0.0	556	AQP9	0.01722356183258698	556	AQP9	0.017223561832586977	3.469446951953614E-18	556	DENND2D	0.015213753232922561	556	DENND2D	0.015213753232922563	1.734723475976807E-18	556	RP2	0.01712035610340695	556	RP2	0.01712035610340695	0.0	556	BTNL9	0.01892863903085368	556	BTNL9	0.01892863903085368	0.0	556	HAVCR2	0.017482517482517484	556	HAVCR2	0.01748251748251748	3.469446951953614E-18
557	CTSK	0.01567152483936687	557	CTSK	0.01567152483936687	0.0	557	CCL20	0.01722356183258698	557	CCL20	0.017223561832586977	3.469446951953614E-18	557	ADGB	0.015213753232922561	557	ADGB	0.015213753232922563	1.734723475976807E-18	557	TBC1D22A	0.01712035610340695	557	TBC1D22A	0.01712035610340695	0.0	557	CCR3	0.01892863903085368	557	CCR3	0.01892863903085368	0.0	557	GPR55	0.017482517482517484	557	GPR55	0.01748251748251748	3.469446951953614E-18
558	FMO4	0.01567152483936687	558	FMO4	0.01567152483936687	0.0	558	ZBTB20	0.01722356183258698	558	ZBTB20	0.017223561832586977	3.469446951953614E-18	558	RNASEL	0.015213753232922561	558	RNASEL	0.015213753232922563	1.734723475976807E-18	558	FRMD4B	0.01712035610340695	558	FRMD4B	0.01712035610340695	0.0	558	IL13RA1	0.01892863903085368	558	IL13RA1	0.01892863903085368	0.0	558	HCFC2	0.017482517482517484	558	HCFC2	0.01748251748251748	3.469446951953614E-18
559	CTSC	0.01567152483936687	559	CTSC	0.01567152483936687	0.0	559	ALPK1	0.01722356183258698	559	ALPK1	0.017223561832586977	3.469446951953614E-18	559	RNASE4	0.015213753232922561	559	RNASE4	0.015213753232922563	1.734723475976807E-18	559	ZC3H12C	0.01712035610340695	559	ZC3H12C	0.01712035610340695	0.0	559	PPP2R5A	0.01892863903085368	559	PPP2R5A	0.01892863903085368	0.0	559	CPNE6	0.017482517482517484	559	CPNE6	0.01748251748251748	3.469446951953614E-18
560	KCNAB1	0.01567152483936687	560	KCNAB1	0.01567152483936687	0.0	560	DOCK8	0.01722356183258698	560	DOCK8	0.017223561832586977	3.469446951953614E-18	560	ZNF365	0.015213753232922561	560	ZNF365	0.015213753232922563	1.734723475976807E-18	560	ZC3H12D	0.01712035610340695	560	ZC3H12D	0.01712035610340695	0.0	560	SH3YL1	0.01892863903085368	560	SH3YL1	0.01892863903085368	0.0	560	RFTN1	0.017482517482517484	560	RFTN1	0.01748251748251748	3.469446951953614E-18
561	TMEM109	0.01567152483936687	561	TMEM109	0.01567152483936687	0.0	561	KIFAP3	0.01722356183258698	561	KIFAP3	0.017223561832586977	3.469446951953614E-18	561	LY9	0.015213753232922561	561	LY9	0.015213753232922563	1.734723475976807E-18	561	KCTD20	0.01712035610340695	561	KCTD20	0.01712035610340695	0.0	561	ITIH2	0.01892863903085368	561	ITIH2	0.01892863903085368	0.0	561	DGKI	0.017482517482517484	561	DGKI	0.01748251748251748	3.469446951953614E-18
562	TRPS1	0.01567152483936687	562	TRPS1	0.01567152483936687	0.0	562	C2CD2L	0.01722356183258698	562	C2CD2L	0.017223561832586977	3.469446951953614E-18	562	KCNN4	0.015213753232922561	562	KCNN4	0.015213753232922563	1.734723475976807E-18	562	DAPK2	0.01712035610340695	562	DAPK2	0.01712035610340695	0.0	562	BRF2	0.01892863903085368	562	BRF2	0.01892863903085368	0.0	562	TDRD10	0.017482517482517484	562	TDRD10	0.01748251748251748	3.469446951953614E-18
563	SMPDL3A	0.01567152483936687	563	SMPDL3A	0.01567152483936687	0.0	563	ADORA3	0.01722356183258698	563	ADORA3	0.017223561832586977	3.469446951953614E-18	563	LYN	0.015213753232922561	563	LYN	0.015213753232922563	1.734723475976807E-18	563	DYRK4	0.01712035610340695	563	DYRK4	0.01712035610340695	0.0	563	BCORL1	0.01892863903085368	563	BCORL1	0.01892863903085368	0.0	563	LIX1L	0.017482517482517484	563	LIX1L	0.01748251748251748	3.469446951953614E-18
564	SYK	0.01567152483936687	564	SYK	0.01567152483936687	0.0	564	FAM126B	0.01722356183258698	564	FAM126B	0.017223561832586977	3.469446951953614E-18	564	FBXL8	0.015213753232922561	564	FBXL8	0.015213753232922563	1.734723475976807E-18	564	GLIPR1	0.01712035610340695	564	GLIPR1	0.01712035610340695	0.0	564	SLC10A3	0.01892863903085368	564	SLC10A3	0.01892863903085368	0.0	564	KCNJ5	0.017482517482517484	564	KCNJ5	0.01748251748251748	3.469446951953614E-18
565	INPP5K	0.01567152483936687	565	INPP5K	0.01567152483936687	0.0	565	TNRC18	0.01722356183258698	565	TNRC18	0.017223561832586977	3.469446951953614E-18	565	KIAA0930	0.015213753232922561	565	KIAA0930	0.015213753232922563	1.734723475976807E-18	565	MCOLN2	0.01712035610340695	565	MCOLN2	0.01712035610340695	0.0	565	SLC10A1	0.01892863903085368	565	SLC10A1	0.01892863903085368	0.0	565	PCSK6	0.017482517482517484	565	PCSK6	0.01748251748251748	3.469446951953614E-18
566	APOL3	0.01567152483936687	566	APOL3	0.01567152483936687	0.0	566	C16orf86	0.01722356183258698	566	C16orf86	0.017223561832586977	3.469446951953614E-18	566	DOK1	0.015213753232922561	566	DOK1	0.015213753232922563	1.734723475976807E-18	566	HORMAD1	0.01712035610340695	566	HORMAD1	0.01712035610340695	0.0	566	TMEM38B	0.01892863903085368	566	TMEM38B	0.01892863903085368	0.0	566	ADAM28	0.017482517482517484	566	ADAM28	0.01748251748251748	3.469446951953614E-18
567	SIAH3	0.01567152483936687	567	SIAH3	0.01567152483936687	0.0	567	PARP9	0.01722356183258698	567	PARP9	0.017223561832586977	3.469446951953614E-18	567	ZADH2	0.015213753232922561	567	ZADH2	0.015213753232922563	1.734723475976807E-18	567	PLAC8	0.01712035610340695	567	PLAC8	0.01712035610340695	0.0	567	CEACAM21	0.01892863903085368	567	CEACAM21	0.01892863903085368	0.0	567	PAPPA	0.017482517482517484	567	PAPPA	0.01748251748251748	3.469446951953614E-18
568	ZNF436	0.01567152483936687	568	ZNF436	0.01567152483936687	0.0	568	CCR3	0.01722356183258698	568	CCR3	0.017223561832586977	3.469446951953614E-18	568	ADAMDEC1	0.015213753232922561	568	ADAMDEC1	0.015213753232922563	1.734723475976807E-18	568	PTPRH	0.01712035610340695	568	PTPRH	0.01712035610340695	0.0	568	LGI1	0.01892863903085368	568	LGI1	0.01892863903085368	0.0	568	MS4A4A	0.017482517482517484	568	MS4A4A	0.01748251748251748	3.469446951953614E-18
569	TEKT1	0.01567152483936687	569	TEKT1	0.01567152483936687	0.0	569	RAB37	0.01722356183258698	569	RAB37	0.017223561832586977	3.469446951953614E-18	569	TLR6	0.015213753232922561	569	TLR6	0.015213753232922563	1.734723475976807E-18	569	CPM	0.01712035610340695	569	CPM	0.01712035610340695	0.0	569	EDN2	0.01892863903085368	569	EDN2	0.01892863903085368	0.0	569	NPL	0.017482517482517484	569	NPL	0.01748251748251748	3.469446951953614E-18
570	LGALS9C	0.01567152483936687	570	LGALS9C	0.01567152483936687	0.0	570	IL13RA1	0.01722356183258698	570	IL13RA1	0.017223561832586977	3.469446951953614E-18	570	CYP4A11	0.015213753232922561	570	CYP4A11	0.015213753232922563	1.734723475976807E-18	570	GPRC5C	0.01712035610340695	570	GPRC5C	0.01712035610340695	0.0	570	RARRES1	0.01892863903085368	570	RARRES1	0.01892863903085368	0.0	570	CD300E	0.017482517482517484	570	CD300E	0.01748251748251748	3.469446951953614E-18
571	RNF144B	0.01567152483936687	571	RNF144B	0.01567152483936687	0.0	571	ANG	0.01722356183258698	571	ANG	0.017223561832586977	3.469446951953614E-18	571	TRAK2	0.015213753232922561	571	TRAK2	0.015213753232922563	1.734723475976807E-18	571	CDC42SE1	0.01712035610340695	571	CDC42SE1	0.01712035610340695	0.0	571	HS3ST4	0.01892863903085368	571	HS3ST4	0.01892863903085368	0.0	571	FFAR4	0.017482517482517484	571	FFAR4	0.01748251748251748	3.469446951953614E-18
572	CARD6	0.01567152483936687	572	CARD6	0.01567152483936687	0.0	572	ITIH2	0.01722356183258698	572	ITIH2	0.017223561832586977	3.469446951953614E-18	572	NFKBIA	0.015213753232922561	572	NFKBIA	0.015213753232922563	1.734723475976807E-18	572	IRAK3	0.01712035610340695	572	IRAK3	0.01712035610340695	0.0	572	HYI	0.01892863903085368	572	HYI	0.01892863903085368	0.0	572	FDX1	0.017482517482517484	572	FDX1	0.01748251748251748	3.469446951953614E-18
573	MAP1B	0.01567152483936687	573	MAP1B	0.01567152483936687	0.0	573	KLRF1	0.01722356183258698	573	KLRF1	0.017223561832586977	3.469446951953614E-18	573	CYTIP	0.015213753232922561	573	CYTIP	0.015213753232922563	1.734723475976807E-18	573	BANK1	0.01712035610340695	573	BANK1	0.01712035610340695	0.0	573	CORO1A	0.01892863903085368	573	CORO1A	0.01892863903085368	0.0	573	ACTA2	0.017482517482517484	573	ACTA2	0.01748251748251748	3.469446951953614E-18
574	PDP1	0.01567152483936687	574	PDP1	0.01567152483936687	0.0	574	SLC10A1	0.01722356183258698	574	SLC10A1	0.017223561832586977	3.469446951953614E-18	574	TMEM119	0.015213753232922561	574	TMEM119	0.015213753232922563	1.734723475976807E-18	574	APBB3	0.01712035610340695	574	APBB3	0.01712035610340695	0.0	574	FAS	0.01892863903085368	574	FAS	0.01892863903085368	0.0	574	GSTM3	0.017482517482517484	574	GSTM3	0.01748251748251748	3.469446951953614E-18
575	FRMD6	0.01567152483936687	575	FRMD6	0.01567152483936687	0.0	575	CEACAM21	0.01722356183258698	575	CEACAM21	0.017223561832586977	3.469446951953614E-18	575	NOX5	0.015213753232922561	575	NOX5	0.015213753232922563	1.734723475976807E-18	575	ENDOU	0.01712035610340695	575	ENDOU	0.01712035610340695	0.0	575	MLLT6	0.01892863903085368	575	MLLT6	0.01892863903085368	0.0	575	RASGRP4	0.017482517482517484	575	RASGRP4	0.01748251748251748	3.469446951953614E-18
576	UBA7	0.01567152483936687	576	UBA7	0.01567152483936687	0.0	576	PUS10	0.01722356183258698	576	PUS10	0.017223561832586977	3.469446951953614E-18	576	RNH1	0.015213753232922561	576	RNH1	0.015213753232922563	1.734723475976807E-18	576	NYAP2	0.01712035610340695	576	NYAP2	0.01712035610340695	0.0	576	NPAS3	0.01892863903085368	576	NPAS3	0.01892863903085368	0.0	576	APOH	0.017482517482517484	576	APOH	0.01748251748251748	3.469446951953614E-18
577	COL12A1	0.01567152483936687	577	COL12A1	0.01567152483936687	0.0	577	AGRP	0.01722356183258698	577	AGRP	0.017223561832586977	3.469446951953614E-18	577	LRRC63	0.015213753232922561	577	LRRC63	0.015213753232922563	1.734723475976807E-18	577	TNFSF13	0.01712035610340695	577	TNFSF13	0.01712035610340695	0.0	577	KRT72	0.01892863903085368	577	KRT72	0.01892863903085368	0.0	577	FAM151B	0.017482517482517484	577	FAM151B	0.01748251748251748	3.469446951953614E-18
578	CRYGS	0.01567152483936687	578	CRYGS	0.01567152483936687	0.0	578	CORO1A	0.01722356183258698	578	CORO1A	0.017223561832586977	3.469446951953614E-18	578	DPEP2	0.015213753232922561	578	DPEP2	0.015213753232922563	1.734723475976807E-18	578	RASL10A	0.01712035610340695	578	RASL10A	0.01712035610340695	0.0	578	TMBIM4	0.01892863903085368	578	TMBIM4	0.01892863903085368	0.0	578	KCNK13	0.017482517482517484	578	KCNK13	0.01748251748251748	3.469446951953614E-18
579	BTBD19	0.01567152483936687	579	BTBD19	0.01567152483936687	0.0	579	DCLRE1C	0.01722356183258698	579	DCLRE1C	0.017223561832586977	3.469446951953614E-18	579	CHN2	0.015213753232922561	579	CHN2	0.015213753232922563	1.734723475976807E-18	579	TNFSF15	0.01712035610340695	579	TNFSF15	0.01712035610340695	0.0	579	IL15RA	0.01892863903085368	579	IL15RA	0.01892863903085368	0.0	579	CTSH	0.017482517482517484	579	CTSH	0.01748251748251748	3.469446951953614E-18
580	COTL1	0.01567152483936687	580	COTL1	0.01567152483936687	0.0	580	MLLT6	0.01722356183258698	580	MLLT6	0.017223561832586977	3.469446951953614E-18	580	CD44	0.015213753232922561	580	CD44	0.015213753232922563	1.734723475976807E-18	580	GPR18	0.01712035610340695	580	GPR18	0.01712035610340695	0.0	580	CASP8	0.01892863903085368	580	CASP8	0.01892863903085368	0.0	580	STARD13	0.017482517482517484	580	STARD13	0.01748251748251748	3.469446951953614E-18
581	KRT4	0.01567152483936687	581	KRT4	0.01567152483936687	0.0	581	AP4E1	0.01722356183258698	581	AP4E1	0.017223561832586977	3.469446951953614E-18	581	UBXN6	0.015213753232922561	581	UBXN6	0.015213753232922563	1.734723475976807E-18	581	IFIT3	0.01712035610340695	581	IFIT3	0.01712035610340695	0.0	581	ECHDC2	0.01892863903085368	581	ECHDC2	0.01892863903085368	0.0	581	FBXO32	0.017482517482517484	581	FBXO32	0.01748251748251748	3.469446951953614E-18
582	TMCC3	0.01567152483936687	582	TMCC3	0.01567152483936687	0.0	582	TMBIM4	0.01722356183258698	582	TMBIM4	0.017223561832586977	3.469446951953614E-18	582	IFI6	0.015213753232922561	582	IFI6	0.015213753232922563	1.734723475976807E-18	582	CLEC4A	0.01712035610340695	582	CLEC4A	0.01712035610340695	0.0	582	PURA	0.01892863903085368	582	PURA	0.01892863903085368	0.0	582	TK2	0.017482517482517484	582	TK2	0.01748251748251748	3.469446951953614E-18
583	GSDMC	0.01567152483936687	583	GSDMC	0.01567152483936687	0.0	583	CASP8	0.01722356183258698	583	CASP8	0.017223561832586977	3.469446951953614E-18	583	PIK3R5	0.015213753232922561	583	PIK3R5	0.015213753232922563	1.734723475976807E-18	583	DCK	0.01712035610340695	583	DCK	0.01712035610340695	0.0	583	BCL6	0.01892863903085368	583	BCL6	0.01892863903085368	0.0	583	THEM6	0.017482517482517484	583	THEM6	0.01748251748251748	3.469446951953614E-18
584	EPB41L3	0.01567152483936687	584	EPB41L3	0.01567152483936687	0.0	584	PURA	0.01722356183258698	584	PURA	0.017223561832586977	3.469446951953614E-18	584	CD300A	0.015213753232922561	584	CD300A	0.015213753232922563	1.734723475976807E-18	584	CASP5	0.01712035610340695	584	CASP5	0.01712035610340695	0.0	584	OLAH	0.01892863903085368	584	OLAH	0.01892863903085368	0.0	584	AKAP13	0.017482517482517484	584	AKAP13	0.01748251748251748	3.469446951953614E-18
585	IL7R	0.01567152483936687	585	IL7R	0.01567152483936687	0.0	585	BCL6	0.01722356183258698	585	BCL6	0.017223561832586977	3.469446951953614E-18	585	GCH1	0.015213753232922561	585	GCH1	0.015213753232922563	1.734723475976807E-18	585	SERPINC1	0.01712035610340695	585	SERPINC1	0.01712035610340695	0.0	585	MAN2B2	0.01892863903085368	585	MAN2B2	0.01892863903085368	0.0	585	SLC25A52	0.017482517482517484	585	SLC25A52	0.01748251748251748	3.469446951953614E-18
586	CREBL2	0.01567152483936687	586	CREBL2	0.01567152483936687	0.0	586	BCL2	0.01722356183258698	586	BCL2	0.017223561832586977	3.469446951953614E-18	586	TNFAIP3	0.015213753232922561	586	TNFAIP3	0.015213753232922563	1.734723475976807E-18	586	WDR37	0.01712035610340695	586	WDR37	0.01712035610340695	0.0	586	DUOXA1	0.01892863903085368	586	DUOXA1	0.01892863903085368	0.0	586	LONRF3	0.017482517482517484	586	LONRF3	0.01748251748251748	3.469446951953614E-18
587	GPR65	0.01567152483936687	587	GPR65	0.01567152483936687	0.0	587	MAN2B2	0.01722356183258698	587	MAN2B2	0.017223561832586977	3.469446951953614E-18	587	XPNPEP2	0.015213753232922561	587	XPNPEP2	0.015213753232922563	1.734723475976807E-18	587	RNASET2	0.01712035610340695	587	RNASET2	0.01712035610340695	0.0	587	LZTFL1	0.01892863903085368	587	LZTFL1	0.01892863903085368	0.0	587	TREML1	0.017482517482517484	587	TREML1	0.01748251748251748	3.469446951953614E-18
588	UAP1L1	0.01567152483936687	588	UAP1L1	0.01567152483936687	0.0	588	PLK3	0.01722356183258698	588	PLK3	0.017223561832586977	3.469446951953614E-18	588	ELOVL1	0.015213753232922561	588	ELOVL1	0.015213753232922563	1.734723475976807E-18	588	SMARCA2	0.01712035610340695	588	SMARCA2	0.01712035610340695	0.0	588	CIB1	0.01892863903085368	588	CIB1	0.01892863903085368	0.0	588	ALG14	0.017482517482517484	588	ALG14	0.01748251748251748	3.469446951953614E-18
589	RAB9B	0.01567152483936687	589	RAB9B	0.01567152483936687	0.0	589	CIB1	0.01722356183258698	589	CIB1	0.017223561832586977	3.469446951953614E-18	589	LIN54	0.015213753232922561	589	LIN54	0.015213753232922563	1.734723475976807E-18	589	GPA33	0.01712035610340695	589	GPA33	0.01712035610340695	0.0	589	FAM110D	0.01892863903085368	589	FAM110D	0.01892863903085368	0.0	589	TMEM150B	0.017482517482517484	589	TMEM150B	0.01748251748251748	3.469446951953614E-18
590	SH3BGRL3	0.01567152483936687	590	SH3BGRL3	0.01567152483936687	0.0	590	PDE7B	0.01722356183258698	590	PDE7B	0.017223561832586977	3.469446951953614E-18	590	DTX3L	0.015213753232922561	590	DTX3L	0.015213753232922563	1.734723475976807E-18	590	SLC25A45	0.01712035610340695	590	SLC25A45	0.01712035610340695	0.0	590	PDE7B	0.01892863903085368	590	PDE7B	0.01892863903085368	0.0	590	SST	0.017482517482517484	590	SST	0.01748251748251748	3.469446951953614E-18
591	IL10	0.01567152483936687	591	IL10	0.01567152483936687	0.0	591	SERPINB1	0.01722356183258698	591	SERPINB1	0.017223561832586977	3.469446951953614E-18	591	FOXP2	0.015213753232922561	591	FOXP2	0.015213753232922563	1.734723475976807E-18	591	POC1B-GALNT4	0.01712035610340695	591	POC1B-GALNT4	0.01712035610340695	0.0	591	SERPINB9	0.01892863903085368	591	SERPINB9	0.01892863903085368	0.0	591	ARL8B	0.017482517482517484	591	ARL8B	0.01748251748251748	3.469446951953614E-18
592	MAEL	0.01567152483936687	592	MAEL	0.01567152483936687	0.0	592	SERPINB6	0.01722356183258698	592	SERPINB6	0.017223561832586977	3.469446951953614E-18	592	DEFB1	0.015213753232922561	592	DEFB1	0.015213753232922563	1.734723475976807E-18	592	ABCA6	0.01712035610340695	592	ABCA6	0.01712035610340695	0.0	592	HTR4	0.01892863903085368	592	HTR4	0.01892863903085368	0.0	592	ALOX5AP	0.017482517482517484	592	ALOX5AP	0.01748251748251748	3.469446951953614E-18
593	IL16	0.01567152483936687	593	IL16	0.01567152483936687	0.0	593	FCRL4	0.01722356183258698	593	FCRL4	0.017223561832586977	3.469446951953614E-18	593	F5	0.015213753232922561	593	F5	0.015213753232922563	1.734723475976807E-18	593	ABCA7	0.01712035610340695	593	ABCA7	0.01712035610340695	0.0	593	SERPINB1	0.01892863903085368	593	SERPINB1	0.01892863903085368	0.0	593	ATP9A	0.017482517482517484	593	ATP9A	0.01748251748251748	3.469446951953614E-18
594	STX12	0.01567152483936687	594	STX12	0.01567152483936687	0.0	594	NEDD9	0.01722356183258698	594	NEDD9	0.017223561832586977	3.469446951953614E-18	594	EVI2A	0.015213753232922561	594	EVI2A	0.015213753232922563	1.734723475976807E-18	594	FAM89B	0.01712035610340695	594	FAM89B	0.01712035610340695	0.0	594	SERPINB6	0.01892863903085368	594	SERPINB6	0.01892863903085368	0.0	594	CTSW	0.017482517482517484	594	CTSW	0.01748251748251748	3.469446951953614E-18
595	LIPA	0.01567152483936687	595	LIPA	0.01567152483936687	0.0	595	CLEC12B	0.01722356183258698	595	CLEC12B	0.017223561832586977	3.469446951953614E-18	595	GNRHR	0.015213753232922561	595	GNRHR	0.015213753232922563	1.734723475976807E-18	595	MITF	0.01712035610340695	595	MITF	0.01712035610340695	0.0	595	ATP8B1	0.01892863903085368	595	ATP8B1	0.01892863903085368	0.0	595	MEF2C	0.017482517482517484	595	MEF2C	0.01748251748251748	3.469446951953614E-18
596	HS1BP3	0.01567152483936687	596	HS1BP3	0.01567152483936687	0.0	596	ANKRD55	0.01722356183258698	596	ANKRD55	0.017223561832586977	3.469446951953614E-18	596	NDP	0.015213753232922561	596	NDP	0.015213753232922563	1.734723475976807E-18	596	RTP4	0.01712035610340695	596	RTP4	0.01712035610340695	0.0	596	CSAD	0.01892863903085368	596	CSAD	0.01892863903085368	0.0	596	CXCR4	0.017482517482517484	596	CXCR4	0.01748251748251748	3.469446951953614E-18
597	BIRC7	0.01567152483936687	597	BIRC7	0.01567152483936687	0.0	597	PKIB	0.01722356183258698	597	PKIB	0.017223561832586977	3.469446951953614E-18	597	RETSAT	0.015213753232922561	597	RETSAT	0.015213753232922563	1.734723475976807E-18	597	MYOF	0.01712035610340695	597	MYOF	0.01712035610340695	0.0	597	ANKRD55	0.01892863903085368	597	ANKRD55	0.01892863903085368	0.0	597	ZNF366	0.017482517482517484	597	ZNF366	0.01748251748251748	3.469446951953614E-18
598	CD6	0.01567152483936687	598	CD6	0.01567152483936687	0.0	598	ST18	0.01722356183258698	598	ST18	0.017223561832586977	3.469446951953614E-18	598	DUSP5	0.015213753232922561	598	DUSP5	0.015213753232922563	1.734723475976807E-18	598	PARM1	0.01712035610340695	598	PARM1	0.01712035610340695	0.0	598	CLCA2	0.01892863903085368	598	CLCA2	0.01892863903085368	0.0	598	CREM	0.017482517482517484	598	CREM	0.01748251748251748	3.469446951953614E-18
599	AEBP1	0.01567152483936687	599	AEBP1	0.01567152483936687	0.0	599	KLHDC1	0.01722356183258698	599	KLHDC1	0.017223561832586977	3.469446951953614E-18	599	ST3GAL6	0.015213753232922561	599	ST3GAL6	0.015213753232922563	1.734723475976807E-18	599	APOL4	0.01712035610340695	599	APOL4	0.01712035610340695	0.0	599	ST18	0.01892863903085368	599	ST18	0.01892863903085368	0.0	599	FAM180A	0.017482517482517484	599	FAM180A	0.01748251748251748	3.469446951953614E-18
600	RBMS3	0.01567152483936687	600	RBMS3	0.01567152483936687	0.0	600	ARRDC5	0.01722356183258698	600	ARRDC5	0.017223561832586977	3.469446951953614E-18	600	GABPB2	0.015213753232922561	600	GABPB2	0.015213753232922563	1.734723475976807E-18	600	APOL1	0.01712035610340695	600	APOL1	0.01712035610340695	0.0	600	KLHDC1	0.01892863903085368	600	KLHDC1	0.01892863903085368	0.0	600	CATSPER1	0.017482517482517484	600	CATSPER1	0.01748251748251748	3.469446951953614E-18
601	EFEMP2	0.01567152483936687	601	EFEMP2	0.01567152483936687	0.0	601	ZZEF1	0.01722356183258698	601	ZZEF1	0.017223561832586977	3.469446951953614E-18	601	GBGT1	0.015213753232922561	601	GBGT1	0.015213753232922563	1.734723475976807E-18	601	ITGB3	0.01712035610340695	601	ITGB3	0.01712035610340695	0.0	601	TNFSF13B	0.01892863903085368	601	TNFSF13B	0.01892863903085368	0.0	601	CRYBB2	0.017482517482517484	601	CRYBB2	0.01748251748251748	3.469446951953614E-18
602	TNFSF12-TNFSF13	0.01567152483936687	602	TNFSF12-TNFSF13	0.01567152483936687	0.0	602	TNFSF13B	0.01722356183258698	602	TNFSF13B	0.017223561832586977	3.469446951953614E-18	602	SIL1	0.015213753232922561	602	SIL1	0.015213753232922563	1.734723475976807E-18	602	ITGB7	0.01712035610340695	602	ITGB7	0.01712035610340695	0.0	602	NPEPPS	0.01892863903085368	602	NPEPPS	0.01892863903085368	0.0	602	IL33	0.017482517482517484	602	IL33	0.01748251748251748	3.469446951953614E-18
603	P2RX4	0.01567152483936687	603	P2RX4	0.01567152483936687	0.0	603	SIRT2	0.01722356183258698	603	SIRT2	0.017223561832586977	3.469446951953614E-18	603	CCL14	0.015213753232922561	603	CCL14	0.015213753232922563	1.734723475976807E-18	603	ABR	0.01712035610340695	603	ABR	0.01712035610340695	0.0	603	COMMD7	0.01892863903085368	603	COMMD7	0.01892863903085368	0.0	603	PLEKHO1	0.017482517482517484	603	PLEKHO1	0.01748251748251748	3.469446951953614E-18
604	DPP9	0.01567152483936687	604	DPP9	0.01567152483936687	0.0	604	SERPINB10	0.01722356183258698	604	SERPINB10	0.017223561832586977	3.469446951953614E-18	604	ADTRP	0.015213753232922561	604	ADTRP	0.015213753232922563	1.734723475976807E-18	604	SUFU	0.01712035610340695	604	SUFU	0.01712035610340695	0.0	604	SCN3B	0.01892863903085368	604	SCN3B	0.01892863903085368	0.0	604	NRP1	0.017482517482517484	604	NRP1	0.01748251748251748	3.469446951953614E-18
605	PI16	0.01567152483936687	605	PI16	0.01567152483936687	0.0	605	NCF2	0.01722356183258698	605	NCF2	0.017223561832586977	3.469446951953614E-18	605	WDR93	0.015213753232922561	605	WDR93	0.015213753232922563	1.734723475976807E-18	605	LCP1	0.01712035610340695	605	LCP1	0.01712035610340695	0.0	605	NCF2	0.01892863903085368	605	NCF2	0.01892863903085368	0.0	605	NRP2	0.017482517482517484	605	NRP2	0.01748251748251748	3.469446951953614E-18
606	ANXA5	0.01567152483936687	606	ANXA5	0.01567152483936687	0.0	606	FNBP1	0.01722356183258698	606	FNBP1	0.017223561832586977	3.469446951953614E-18	606	SYNGR2	0.015213753232922561	606	SYNGR2	0.015213753232922563	1.734723475976807E-18	606	TBXAS1	0.01712035610340695	606	TBXAS1	0.01712035610340695	0.0	606	TBC1D9	0.01892863903085368	606	TBC1D9	0.01892863903085368	0.0	606	FUT6	0.017482517482517484	606	FUT6	0.01748251748251748	3.469446951953614E-18
607	ANXA4	0.01567152483936687	607	ANXA4	0.01567152483936687	0.0	607	ERMN	0.01722356183258698	607	ERMN	0.017223561832586977	3.469446951953614E-18	607	CLEC12A	0.015213753232922561	607	CLEC12A	0.015213753232922563	1.734723475976807E-18	607	KDM7A	0.01712035610340695	607	KDM7A	0.01712035610340695	0.0	607	SERPING1	0.01892863903085368	607	SERPING1	0.01892863903085368	0.0	607	CTBS	0.017482517482517484	607	CTBS	0.01748251748251748	3.469446951953614E-18
608	REG1A	0.01567152483936687	608	REG1A	0.01567152483936687	0.0	608	TLR10	0.01722356183258698	608	TLR10	0.017223561832586977	3.469446951953614E-18	608	CPED1	0.015213753232922561	608	CPED1	0.015213753232922563	1.734723475976807E-18	608	CMTM3	0.01712035610340695	608	CMTM3	0.01712035610340695	0.0	608	TBC1D2	0.01892863903085368	608	TBC1D2	0.01892863903085368	0.0	608	SYTL4	0.017482517482517484	608	SYTL4	0.01748251748251748	3.469446951953614E-18
609	COQ10B	0.01567152483936687	609	COQ10B	0.01567152483936687	0.0	609	TBC1D9	0.01722356183258698	609	TBC1D9	0.017223561832586977	3.469446951953614E-18	609	HAVCR2	0.015213753232922561	609	HAVCR2	0.015213753232922563	1.734723475976807E-18	609	CMTM7	0.01712035610340695	609	CMTM7	0.01712035610340695	0.0	609	SYNE1	0.01892863903085368	609	SYNE1	0.01892863903085368	0.0	609	FLVCR2	0.017482517482517484	609	FLVCR2	0.01748251748251748	3.469446951953614E-18
610	GPD1L	0.01567152483936687	610	GPD1L	0.01567152483936687	0.0	610	SUCNR1	0.01722356183258698	610	SUCNR1	0.017223561832586977	3.469446951953614E-18	610	CHIA	0.015213753232922561	610	CHIA	0.015213753232922563	1.734723475976807E-18	610	MPC2	0.01712035610340695	610	MPC2	0.01712035610340695	0.0	610	RP2	0.01892863903085368	610	RP2	0.01892863903085368	0.0	610	CDH5	0.017482517482517484	610	CDH5	0.01748251748251748	3.469446951953614E-18
611	SAMHD1	0.01567152483936687	611	SAMHD1	0.01567152483936687	0.0	611	MTHFR	0.01722356183258698	611	MTHFR	0.017223561832586977	3.469446951953614E-18	611	HCFC2	0.015213753232922561	611	HCFC2	0.015213753232922563	1.734723475976807E-18	611	STAT4	0.01712035610340695	611	STAT4	0.01712035610340695	0.0	611	ZC3H12C	0.01892863903085368	611	ZC3H12C	0.01892863903085368	0.0	611	RAMP1	0.017482517482517484	611	RAMP1	0.01748251748251748	3.469446951953614E-18
612	PCP4	0.01567152483936687	612	PCP4	0.01567152483936687	0.0	612	UNC13D	0.01722356183258698	612	UNC13D	0.017223561832586977	3.469446951953614E-18	612	CPNE6	0.015213753232922561	612	CPNE6	0.015213753232922563	1.734723475976807E-18	612	RASAL3	0.01712035610340695	612	RASAL3	0.01712035610340695	0.0	612	UBASH3B	0.01892863903085368	612	UBASH3B	0.01892863903085368	0.0	612	TMEM229B	0.017482517482517484	612	TMEM229B	0.01748251748251748	3.469446951953614E-18
613	RNFT1	0.01567152483936687	613	RNFT1	0.01567152483936687	0.0	613	SYNE1	0.01722356183258698	613	SYNE1	0.017223561832586977	3.469446951953614E-18	613	RFTN1	0.015213753232922561	613	RFTN1	0.015213753232922563	1.734723475976807E-18	613	CLEC5A	0.01712035610340695	613	CLEC5A	0.01712035610340695	0.0	613	CASP7	0.01892863903085368	613	CASP7	0.01892863903085368	0.0	613	SSH1	0.017482517482517484	613	SSH1	0.01748251748251748	3.469446951953614E-18
614	TIMP3	0.01567152483936687	614	TIMP3	0.01567152483936687	0.0	614	CLEC6A	0.01722356183258698	614	CLEC6A	0.017223561832586977	3.469446951953614E-18	614	ZBP1	0.015213753232922561	614	ZBP1	0.015213753232922563	1.734723475976807E-18	614	FGR	0.01712035610340695	614	FGR	0.01712035610340695	0.0	614	DAPK2	0.01892863903085368	614	DAPK2	0.01892863903085368	0.0	614	RNF19B	0.017482517482517484	614	RNF19B	0.01748251748251748	3.469446951953614E-18
615	MS4A8	0.01567152483936687	615	MS4A8	0.01567152483936687	0.0	615	EMP1	0.01722356183258698	615	EMP1	0.017223561832586977	3.469446951953614E-18	615	LIX1L	0.015213753232922561	615	LIX1L	0.015213753232922563	1.734723475976807E-18	615	PLD1	0.01712035610340695	615	PLD1	0.01712035610340695	0.0	615	DYRK4	0.01892863903085368	615	DYRK4	0.01892863903085368	0.0	615	SLC41A2	0.017482517482517484	615	SLC41A2	0.01748251748251748	3.469446951953614E-18
616	LEPROT	0.01567152483936687	616	LEPROT	0.01567152483936687	0.0	616	RP2	0.01722356183258698	616	RP2	0.017223561832586977	3.469446951953614E-18	616	USP15	0.015213753232922561	616	USP15	0.015213753232922563	1.734723475976807E-18	616	CLECL1	0.01712035610340695	616	CLECL1	0.01712035610340695	0.0	616	KCNJ15	0.01892863903085368	616	KCNJ15	0.01892863903085368	0.0	616	CSF1	0.017482517482517484	616	CSF1	0.01748251748251748	3.469446951953614E-18
617	SELPLG	0.01567152483936687	617	SELPLG	0.01567152483936687	0.0	617	TBC1D22A	0.01722356183258698	617	TBC1D22A	0.017223561832586977	3.469446951953614E-18	617	KCNJ5	0.015213753232922561	617	KCNJ5	0.015213753232922563	1.734723475976807E-18	617	PXDC1	0.01712035610340695	617	PXDC1	0.01712035610340695	0.0	617	MCOLN3	0.01892863903085368	617	MCOLN3	0.01892863903085368	0.0	617	GPR68	0.017482517482517484	617	GPR68	0.01748251748251748	3.469446951953614E-18
618	NHLRC1	0.01567152483936687	618	NHLRC1	0.01567152483936687	0.0	618	FRMD4B	0.01722356183258698	618	FRMD4B	0.017223561832586977	3.469446951953614E-18	618	BCL10	0.015213753232922561	618	BCL10	0.015213753232922563	1.734723475976807E-18	618	GNG2	0.01712035610340695	618	GNG2	0.01712035610340695	0.0	618	HORMAD1	0.01892863903085368	618	HORMAD1	0.01892863903085368	0.0	618	CD300LB	0.017482517482517484	618	CD300LB	0.01748251748251748	3.469446951953614E-18
619	DENND2D	0.01567152483936687	619	DENND2D	0.01567152483936687	0.0	619	ZC3H12C	0.01722356183258698	619	ZC3H12C	0.017223561832586977	3.469446951953614E-18	619	SBNO2	0.015213753232922561	619	SBNO2	0.015213753232922563	1.734723475976807E-18	619	ELMO1	0.01712035610340695	619	ELMO1	0.01712035610340695	0.0	619	PLAC8	0.01892863903085368	619	PLAC8	0.01892863903085368	0.0	619	ERAP1	0.017482517482517484	619	ERAP1	0.01748251748251748	3.469446951953614E-18
620	PPT1	0.01567152483936687	620	PPT1	0.01567152483936687	0.0	620	ZC3H12D	0.01722356183258698	620	ZC3H12D	0.017223561832586977	3.469446951953614E-18	620	MXI1	0.015213753232922561	620	MXI1	0.015213753232922563	1.734723475976807E-18	620	SNX3	0.01712035610340695	620	SNX3	0.01712035610340695	0.0	620	PTPRM	0.01892863903085368	620	PTPRM	0.01892863903085368	0.0	620	XKRX	0.017482517482517484	620	XKRX	0.01748251748251748	3.469446951953614E-18
621	ADGB	0.01567152483936687	621	ADGB	0.01567152483936687	0.0	621	UBASH3B	0.01722356183258698	621	UBASH3B	0.017223561832586977	3.469446951953614E-18	621	ZDHHC12	0.015213753232922561	621	ZDHHC12	0.015213753232922563	1.734723475976807E-18	621	CYB5R4	0.01712035610340695	621	CYB5R4	0.01712035610340695	0.0	621	RNLS	0.01892863903085368	621	RNLS	0.01892863903085368	0.0	621	HSPB7	0.017482517482517484	621	HSPB7	0.01748251748251748	3.469446951953614E-18
622	RNASEK	0.01567152483936687	622	RNASEK	0.01567152483936687	0.0	622	DAPK2	0.01722356183258698	622	DAPK2	0.017223561832586977	3.469446951953614E-18	622	PCSK6	0.015213753232922561	622	PCSK6	0.015213753232922563	1.734723475976807E-18	622	SECTM1	0.01712035610340695	622	SECTM1	0.01712035610340695	0.0	622	TUBA1A	0.01892863903085368	622	TUBA1A	0.01892863903085368	0.0	622	TREM2	0.017482517482517484	622	TREM2	0.01748251748251748	3.469446951953614E-18
623	RNASEL	0.01567152483936687	623	RNASEL	0.01567152483936687	0.0	623	DYRK4	0.01722356183258698	623	DYRK4	0.017223561832586977	3.469446951953614E-18	623	ZFYVE16	0.015213753232922561	623	ZFYVE16	0.015213753232922563	1.734723475976807E-18	623	CMTM2	0.01712035610340695	623	CMTM2	0.01712035610340695	0.0	623	CPD	0.01892863903085368	623	CPD	0.01892863903085368	0.0	623	ANXA2	0.017482517482517484	623	ANXA2	0.01748251748251748	3.469446951953614E-18
624	RNASE4	0.01567152483936687	624	RNASE4	0.01567152483936687	0.0	624	GLIPR1	0.01722356183258698	624	GLIPR1	0.017223561832586977	3.469446951953614E-18	624	ADAM28	0.015213753232922561	624	ADAM28	0.015213753232922563	1.734723475976807E-18	624	ARL4C	0.01712035610340695	624	ARL4C	0.01712035610340695	0.0	624	CPE	0.01892863903085368	624	CPE	0.01892863903085368	0.0	624	LAMB3	0.017482517482517484	624	LAMB3	0.01748251748251748	3.469446951953614E-18
625	ZNF365	0.01567152483936687	625	ZNF365	0.01567152483936687	0.0	625	MCOLN2	0.01722356183258698	625	MCOLN2	0.017223561832586977	3.469446951953614E-18	625	CES5A	0.015213753232922561	625	CES5A	0.015213753232922563	1.734723475976807E-18	625	YPEL2	0.01712035610340695	625	YPEL2	0.01712035610340695	0.0	625	MFAP4	0.01892863903085368	625	MFAP4	0.01892863903085368	0.0	625	SIRPG	0.017482517482517484	625	SIRPG	0.01748251748251748	3.469446951953614E-18
626	LY9	0.01567152483936687	626	LY9	0.01567152483936687	0.0	626	HORMAD1	0.01722356183258698	626	HORMAD1	0.017223561832586977	3.469446951953614E-18	626	MS4A4A	0.015213753232922561	626	MS4A4A	0.015213753232922563	1.734723475976807E-18	626	CD200R1	0.01712035610340695	626	CD200R1	0.01712035610340695	0.0	626	IRAK3	0.01892863903085368	626	IRAK3	0.01892863903085368	0.0	626	TGFB1	0.017482517482517484	626	TGFB1	0.01748251748251748	3.469446951953614E-18
627	KCNN4	0.01567152483936687	627	KCNN4	0.01567152483936687	0.0	627	PLAC8	0.01722356183258698	627	PLAC8	0.017223561832586977	3.469446951953614E-18	627	NPL	0.015213753232922561	627	NPL	0.015213753232922563	1.734723475976807E-18	627	CLDN1	0.01712035610340695	627	CLDN1	0.01712035610340695	0.0	627	BANK1	0.01892863903085368	627	BANK1	0.01892863903085368	0.0	627	G0S2	0.017482517482517484	627	G0S2	0.01748251748251748	3.469446951953614E-18
628	LYN	0.01567152483936687	628	LYN	0.01567152483936687	0.0	628	CPM	0.01722356183258698	628	CPM	0.017223561832586977	3.469446951953614E-18	628	CD300E	0.015213753232922561	628	CD300E	0.015213753232922563	1.734723475976807E-18	628	PLXDC2	0.01712035610340695	628	PLXDC2	0.01712035610340695	0.0	628	ABLIM3	0.01892863903085368	628	ABLIM3	0.01892863903085368	0.0	628	ANPEP	0.017482517482517484	628	ANPEP	0.01748251748251748	3.469446951953614E-18
629	FBXL8	0.01567152483936687	629	FBXL8	0.01567152483936687	0.0	629	GPRC5C	0.01722356183258698	629	GPRC5C	0.017223561832586977	3.469446951953614E-18	629	FFAR4	0.015213753232922561	629	FFAR4	0.015213753232922563	1.734723475976807E-18	629	ORAI2	0.01712035610340695	629	ORAI2	0.01712035610340695	0.0	629	PRR18	0.01892863903085368	629	PRR18	0.01892863903085368	0.0	629	VNN3	0.017482517482517484	629	VNN3	0.01748251748251748	3.469446951953614E-18
630	DOK1	0.01567152483936687	630	DOK1	0.01567152483936687	0.0	630	CDC42SE1	0.01722356183258698	630	CDC42SE1	0.017223561832586977	3.469446951953614E-18	630	FDX1	0.015213753232922561	630	FDX1	0.015213753232922563	1.734723475976807E-18	630	GALNT4	0.01712035610340695	630	GALNT4	0.01712035610340695	0.0	630	RASL10A	0.01892863903085368	630	RASL10A	0.01892863903085368	0.0	630	TIFA	0.017482517482517484	630	TIFA	0.01748251748251748	3.469446951953614E-18
631	ISLR	0.01567152483936687	631	ISLR	0.01567152483936687	0.0	631	IRAK3	0.01722356183258698	631	IRAK3	0.017223561832586977	3.469446951953614E-18	631	ACTA2	0.015213753232922561	631	ACTA2	0.015213753232922563	1.734723475976807E-18	631	FAM78A	0.01712035610340695	631	FAM78A	0.01712035610340695	0.0	631	TNFSF15	0.01892863903085368	631	TNFSF15	0.01892863903085368	0.0	631	SHE	0.017482517482517484	631	SHE	0.01748251748251748	3.469446951953614E-18
632	ZADH2	0.01567152483936687	632	ZADH2	0.01567152483936687	0.0	632	BANK1	0.01722356183258698	632	BANK1	0.017223561832586977	3.469446951953614E-18	632	GPCPD1	0.015213753232922561	632	GPCPD1	0.015213753232922563	1.734723475976807E-18	632	ANXA2R	0.01712035610340695	632	ANXA2R	0.01712035610340695	0.0	632	GPR18	0.01892863903085368	632	GPR18	0.01892863903085368	0.0	632	GLTPD2	0.017482517482517484	632	GLTPD2	0.01748251748251748	3.469446951953614E-18
633	ADAMDEC1	0.01567152483936687	633	ADAMDEC1	0.01567152483936687	0.0	633	SPNS2	0.01722356183258698	633	SPNS2	0.017223561832586977	3.469446951953614E-18	633	RASGRP4	0.015213753232922561	633	RASGRP4	0.015213753232922563	1.734723475976807E-18	633	CLEC10A	0.01712035610340695	633	CLEC10A	0.01712035610340695	0.0	633	IFIT3	0.01892863903085368	633	IFIT3	0.01892863903085368	0.0	633	PLA2G15	0.017482517482517484	633	PLA2G15	0.01748251748251748	3.469446951953614E-18
634	TLR6	0.01567152483936687	634	TLR6	0.01567152483936687	0.0	634	APBB3	0.01722356183258698	634	APBB3	0.017223561832586977	3.469446951953614E-18	634	UBE2D4	0.015213753232922561	634	UBE2D4	0.015213753232922563	1.734723475976807E-18	634	FILIP1L	0.01712035610340695	634	FILIP1L	0.01712035610340695	0.0	634	IFIT2	0.01892863903085368	634	IFIT2	0.01892863903085368	0.0	634	ALDH1A2	0.017482517482517484	634	ALDH1A2	0.01748251748251748	3.469446951953614E-18
635	TRAK2	0.01567152483936687	635	TRAK2	0.01567152483936687	0.0	635	ENDOU	0.01722356183258698	635	ENDOU	0.017223561832586977	3.469446951953614E-18	635	FAM151B	0.015213753232922561	635	FAM151B	0.015213753232922563	1.734723475976807E-18	635	ZFHX3	0.01712035610340695	635	ZFHX3	0.01712035610340695	0.0	635	CLEC4A	0.01892863903085368	635	CLEC4A	0.01892863903085368	0.0	635	ANXA1	0.017482517482517484	635	ANXA1	0.01748251748251748	3.469446951953614E-18
636	NFKBIA	0.01567152483936687	636	NFKBIA	0.01567152483936687	0.0	636	TNFSF13	0.01722356183258698	636	TNFSF13	0.017223561832586977	3.469446951953614E-18	636	REG3A	0.015213753232922561	636	REG3A	0.015213753232922563	1.734723475976807E-18	636	MXD1	0.01712035610340695	636	MXD1	0.01712035610340695	0.0	636	AKTIP	0.01892863903085368	636	AKTIP	0.01892863903085368	0.0	636	GPR15	0.017482517482517484	636	GPR15	0.01748251748251748	3.469446951953614E-18
637	CYTIP	0.01567152483936687	637	CYTIP	0.01567152483936687	0.0	637	RASL10A	0.01722356183258698	637	RASL10A	0.017223561832586977	3.469446951953614E-18	637	KCNK13	0.015213753232922561	637	KCNK13	0.015213753232922563	1.734723475976807E-18	637	NLRP3	0.01712035610340695	637	NLRP3	0.01712035610340695	0.0	637	ZDHHC1	0.01892863903085368	637	ZDHHC1	0.01892863903085368	0.0	637	TREM1	0.017482517482517484	637	TREM1	0.01748251748251748	3.469446951953614E-18
638	NOX1	0.01567152483936687	638	NOX1	0.01567152483936687	0.0	638	TNFSF15	0.01722356183258698	638	TNFSF15	0.017223561832586977	3.469446951953614E-18	638	SLC39A8	0.015213753232922561	638	SLC39A8	0.015213753232922563	1.734723475976807E-18	638	BTLA	0.01712035610340695	638	BTLA	0.01712035610340695	0.0	638	CASP5	0.01892863903085368	638	CASP5	0.01892863903085368	0.0	638	ITPRIP	0.017482517482517484	638	ITPRIP	0.01748251748251748	3.469446951953614E-18
639	TMEM119	0.01567152483936687	639	TMEM119	0.01567152483936687	0.0	639	TNFSF18	0.01722356183258698	639	TNFSF18	0.017223561832586977	3.469446951953614E-18	639	TM4SF20	0.015213753232922561	639	TM4SF20	0.015213753232922563	1.734723475976807E-18	639	TNFSF9	0.01712035610340695	639	TNFSF9	0.01712035610340695	0.0	639	GPX7	0.01892863903085368	639	GPX7	0.01892863903085368	0.0	639	LUM	0.017482517482517484	639	LUM	0.01748251748251748	3.469446951953614E-18
640	RNH1	0.01567152483936687	640	RNH1	0.01567152483936687	0.0	640	GPR18	0.01722356183258698	640	GPR18	0.017223561832586977	3.469446951953614E-18	640	CTSH	0.015213753232922561	640	CTSH	0.015213753232922563	1.734723475976807E-18	640	ADAP2	0.01712035610340695	640	ADAP2	0.01712035610340695	0.0	640	PDE6H	0.01892863903085368	640	PDE6H	0.01892863903085368	0.0	640	GAS2L1	0.017482517482517484	640	GAS2L1	0.01748251748251748	3.469446951953614E-18
641	LRRC63	0.01567152483936687	641	LRRC63	0.01567152483936687	0.0	641	IFIT3	0.01722356183258698	641	IFIT3	0.017223561832586977	3.469446951953614E-18	641	LEKR1	0.015213753232922561	641	LEKR1	0.015213753232922563	1.734723475976807E-18	641	LYST	0.01712035610340695	641	LYST	0.01712035610340695	0.0	641	CROT	0.01892863903085368	641	CROT	0.01892863903085368	0.0	641	ZNF438	0.017482517482517484	641	ZNF438	0.01748251748251748	3.469446951953614E-18
642	SRPX	0.01567152483936687	642	SRPX	0.01567152483936687	0.0	642	IFIT2	0.01722356183258698	642	IFIT2	0.017223561832586977	3.469446951953614E-18	642	STARD13	0.015213753232922561	642	STARD13	0.015213753232922563	1.734723475976807E-18	642	LYSMD2	0.01712035610340695	642	LYSMD2	0.01712035610340695	0.0	642	SMARCA2	0.01892863903085368	642	SMARCA2	0.01892863903085368	0.0	642	RALGDS	0.017482517482517484	642	RALGDS	0.01748251748251748	3.469446951953614E-18
643	DPEP2	0.01567152483936687	643	DPEP2	0.01567152483936687	0.0	643	RWDD2B	0.01722356183258698	643	RWDD2B	0.017223561832586977	3.469446951953614E-18	643	FBXO32	0.015213753232922561	643	FBXO32	0.015213753232922563	1.734723475976807E-18	643	CSTA	0.01712035610340695	643	CSTA	0.01712035610340695	0.0	643	GPA33	0.01892863903085368	643	GPA33	0.01892863903085368	0.0	643	FGD2	0.017482517482517484	643	FGD2	0.01748251748251748	3.469446951953614E-18
644	CHN2	0.01567152483936687	644	CHN2	0.01567152483936687	0.0	644	CLEC4A	0.01722356183258698	644	CLEC4A	0.017223561832586977	3.469446951953614E-18	644	TK2	0.015213753232922561	644	TK2	0.015213753232922563	1.734723475976807E-18	644	KAT2B	0.01712035610340695	644	KAT2B	0.01712035610340695	0.0	644	SRPX2	0.01892863903085368	644	SRPX2	0.01892863903085368	0.0	644	AGAP2	0.017482517482517484	644	AGAP2	0.01748251748251748	3.469446951953614E-18
645	PRSS35	0.01567152483936687	645	PRSS35	0.01567152483936687	0.0	645	CASP5	0.01722356183258698	645	CASP5	0.017223561832586977	3.469446951953614E-18	645	EPDR1	0.015213753232922561	645	EPDR1	0.015213753232922563	1.734723475976807E-18	645	TRIM69	0.01712035610340695	645	TRIM69	0.01712035610340695	0.0	645	F8	0.01892863903085368	645	F8	0.01892863903085368	0.0	645	TM6SF1	0.017482517482517484	645	TM6SF1	0.01748251748251748	3.469446951953614E-18
646	CD44	0.01567152483936687	646	CD44	0.01567152483936687	0.0	646	WDR37	0.01722356183258698	646	WDR37	0.017223561832586977	3.469446951953614E-18	646	THEM6	0.015213753232922561	646	THEM6	0.015213753232922563	1.734723475976807E-18	646	LAMP3	0.01712035610340695	646	LAMP3	0.01712035610340695	0.0	646	ABCA6	0.01892863903085368	646	ABCA6	0.01892863903085368	0.0	646	FBXW5	0.017482517482517484	646	FBXW5	0.01748251748251748	3.469446951953614E-18
647	ASIC1	0.01567152483936687	647	ASIC1	0.01567152483936687	0.0	647	RNASET2	0.01722356183258698	647	RNASET2	0.017223561832586977	3.469446951953614E-18	647	AKAP13	0.015213753232922561	647	AKAP13	0.015213753232922563	1.734723475976807E-18	647	OMG	0.01712035610340695	647	OMG	0.01712035610340695	0.0	647	ABCA7	0.01892863903085368	647	ABCA7	0.01892863903085368	0.0	647	CCRL2	0.017482517482517484	647	CCRL2	0.01748251748251748	3.469446951953614E-18
648	ZCCHC24	0.01567152483936687	648	ZCCHC24	0.01567152483936687	0.0	648	SMARCA2	0.01722356183258698	648	SMARCA2	0.017223561832586977	3.469446951953614E-18	648	MBOAT4	0.015213753232922561	648	MBOAT4	0.015213753232922563	1.734723475976807E-18	648	AATK	0.01712035610340695	648	AATK	0.01712035610340695	0.0	648	FAM89B	0.01892863903085368	648	FAM89B	0.01892863903085368	0.0	648	SLC23A2	0.017482517482517484	648	SLC23A2	0.01748251748251748	3.469446951953614E-18
649	IFI6	0.01567152483936687	649	IFI6	0.01567152483936687	0.0	649	TFPI	0.01722356183258698	649	TFPI	0.017223561832586977	3.469446951953614E-18	649	OXER1	0.015213753232922561	649	OXER1	0.015213753232922563	1.734723475976807E-18	649	KY	0.01712035610340695	649	KY	0.01712035610340695	0.0	649	IGSF3	0.01892863903085368	649	IGSF3	0.01892863903085368	0.0	649	SLAMF7	0.017482517482517484	649	SLAMF7	0.01748251748251748	3.469446951953614E-18
650	PIK3R5	0.01567152483936687	650	PIK3R5	0.01567152483936687	0.0	650	GPA33	0.01722356183258698	650	GPA33	0.017223561832586977	3.469446951953614E-18	650	SLC25A52	0.015213753232922561	650	SLC25A52	0.015213753232922563	1.734723475976807E-18	650	NAGPA	0.01712035610340695	650	NAGPA	0.01712035610340695	0.0	650	RTP4	0.01892863903085368	650	RTP4	0.01892863903085368	0.0	650	SLAMF6	0.017482517482517484	650	SLAMF6	0.01748251748251748	3.469446951953614E-18
651	FGF1	0.01567152483936687	651	FGF1	0.01567152483936687	0.0	651	SLC25A45	0.01722356183258698	651	SLC25A45	0.017223561832586977	3.469446951953614E-18	651	EPS8L3	0.015213753232922561	651	EPS8L3	0.015213753232922563	1.734723475976807E-18	651	IGIP	0.01712035610340695	651	IGIP	0.01712035610340695	0.0	651	MFSD6L	0.01892863903085368	651	MFSD6L	0.01892863903085368	0.0	651	FAM107B	0.017482517482517484	651	FAM107B	0.01748251748251748	3.469446951953614E-18
652	BCAN	0.01567152483936687	652	BCAN	0.01567152483936687	0.0	652	POC1B-GALNT4	0.01722356183258698	652	POC1B-GALNT4	0.017223561832586977	3.469446951953614E-18	652	TGM4	0.015213753232922561	652	TGM4	0.015213753232922563	1.734723475976807E-18	652	CD244	0.01712035610340695	652	CD244	0.01712035610340695	0.0	652	MYOF	0.01892863903085368	652	MYOF	0.01892863903085368	0.0	652	SLAMF1	0.017482517482517484	652	SLAMF1	0.01748251748251748	3.469446951953614E-18
653	CD300A	0.01567152483936687	653	CD300A	0.01567152483936687	0.0	653	ABCA6	0.01722356183258698	653	ABCA6	0.017223561832586977	3.469446951953614E-18	653	LONRF3	0.015213753232922561	653	LONRF3	0.015213753232922563	1.734723475976807E-18	653	LOXL3	0.01712035610340695	653	LOXL3	0.01712035610340695	0.0	653	MAB21L1	0.01892863903085368	653	MAB21L1	0.01892863903085368	0.0	653	TGFB2	0.017482517482517484	653	TGFB2	0.01748251748251748	3.469446951953614E-18
654	PRPH	0.01567152483936687	654	PRPH	0.01567152483936687	0.0	654	ABCA7	0.01722356183258698	654	ABCA7	0.017223561832586977	3.469446951953614E-18	654	TREML1	0.015213753232922561	654	TREML1	0.015213753232922563	1.734723475976807E-18	654	MFSD1	0.01712035610340695	654	MFSD1	0.01712035610340695	0.0	654	PARM1	0.01892863903085368	654	PARM1	0.01892863903085368	0.0	654	TGFBR2	0.017482517482517484	654	TGFBR2	0.01748251748251748	3.469446951953614E-18
655	TNFAIP3	0.01567152483936687	655	TNFAIP3	0.01567152483936687	0.0	655	ABCA1	0.01722356183258698	655	ABCA1	0.017223561832586977	3.469446951953614E-18	655	ALG14	0.015213753232922561	655	ALG14	0.015213753232922563	1.734723475976807E-18	655	MFSD5	0.01712035610340695	655	MFSD5	0.01712035610340695	0.0	655	HSD17B2	0.01892863903085368	655	HSD17B2	0.01892863903085368	0.0	655	MAP3K7CL	0.017482517482517484	655	MAP3K7CL	0.01748251748251748	3.469446951953614E-18
656	XPNPEP2	0.01567152483936687	656	XPNPEP2	0.01567152483936687	0.0	656	FAM89B	0.01722356183258698	656	FAM89B	0.017223561832586977	3.469446951953614E-18	656	TMEM63A	0.015213753232922561	656	TMEM63A	0.015213753232922563	1.734723475976807E-18	656	CYBB	0.01712035610340695	656	CYBB	0.01712035610340695	0.0	656	APOL4	0.01892863903085368	656	APOL4	0.01892863903085368	0.0	656	TET2	0.017482517482517484	656	TET2	0.01748251748251748	3.469446951953614E-18
657	ELOVL1	0.01567152483936687	657	ELOVL1	0.01567152483936687	0.0	657	KLRD1	0.01722356183258698	657	KLRD1	0.017223561832586977	3.469446951953614E-18	657	TMEM150B	0.015213753232922561	657	TMEM150B	0.015213753232922563	1.734723475976807E-18	657	CRHBP	0.01712035610340695	657	CRHBP	0.01712035610340695	0.0	657	APOL1	0.01892863903085368	657	APOL1	0.01892863903085368	0.0	657	MGAT1	0.017482517482517484	657	MGAT1	0.01748251748251748	3.469446951953614E-18
658	BAIAP2	0.01567152483936687	658	BAIAP2	0.01567152483936687	0.0	658	MITF	0.01722356183258698	658	MITF	0.017223561832586977	3.469446951953614E-18	658	CPB2	0.015213753232922561	658	CPB2	0.015213753232922563	1.734723475976807E-18	658	CMTM1	0.01712035610340695	658	CMTM1	0.01712035610340695	0.0	658	ITGB3	0.01892863903085368	658	ITGB3	0.01892863903085368	0.0	658	MGAT2	0.017482517482517484	658	MGAT2	0.01748251748251748	3.469446951953614E-18
659	DTX3L	0.01567152483936687	659	DTX3L	0.01567152483936687	0.0	659	RTP4	0.01722356183258698	659	RTP4	0.017223561832586977	3.469446951953614E-18	659	ARL8B	0.015213753232922561	659	ARL8B	0.015213753232922563	1.734723475976807E-18	659	AQP6	0.01712035610340695	659	AQP6	0.01712035610340695	0.0	659	ITGB7	0.01892863903085368	659	ITGB7	0.01892863903085368	0.0	659	IER5L	0.017482517482517484	659	IER5L	0.01748251748251748	3.469446951953614E-18
660	FOXP2	0.01567152483936687	660	FOXP2	0.01567152483936687	0.0	660	MYOF	0.01722356183258698	660	MYOF	0.017223561832586977	3.469446951953614E-18	660	C8G	0.015213753232922561	660	C8G	0.015213753232922563	1.734723475976807E-18	660	CLEC4E	0.01712035610340695	660	CLEC4E	0.01712035610340695	0.0	660	LCP1	0.01892863903085368	660	LCP1	0.01892863903085368	0.0	660	GLRX	0.017482517482517484	660	GLRX	0.01748251748251748	3.469446951953614E-18
661	TNC	0.01567152483936687	661	TNC	0.01567152483936687	0.0	661	PARM1	0.01722356183258698	661	PARM1	0.017223561832586977	3.469446951953614E-18	661	ALOX5AP	0.015213753232922561	661	ALOX5AP	0.015213753232922563	1.734723475976807E-18	661	NOTCH1	0.01712035610340695	661	NOTCH1	0.01712035610340695	0.0	661	TTYH2	0.01892863903085368	661	TTYH2	0.01892863903085368	0.0	661	CHST11	0.017482517482517484	661	CHST11	0.01748251748251748	3.469446951953614E-18
662	SORCS2	0.01567152483936687	662	SORCS2	0.01567152483936687	0.0	662	APOL4	0.01722356183258698	662	APOL4	0.017223561832586977	3.469446951953614E-18	662	ATP9A	0.015213753232922561	662	ATP9A	0.015213753232922563	1.734723475976807E-18	662	RAPGEF4	0.01712035610340695	662	RAPGEF4	0.01712035610340695	0.0	662	TBXAS1	0.01892863903085368	662	TBXAS1	0.01892863903085368	0.0	662	VAMP5	0.017482517482517484	662	VAMP5	0.01748251748251748	3.469446951953614E-18
663	F5	0.01567152483936687	663	F5	0.01567152483936687	0.0	663	APOL1	0.01722356183258698	663	APOL1	0.017223561832586977	3.469446951953614E-18	663	CTSW	0.015213753232922561	663	CTSW	0.015213753232922563	1.734723475976807E-18	663	RAPGEF1	0.01712035610340695	663	RAPGEF1	0.01712035610340695	0.0	663	MBD6	0.01892863903085368	663	MBD6	0.01892863903085368	0.0	663	COL15A1	0.017482517482517484	663	COL15A1	0.01748251748251748	3.469446951953614E-18
664	EVI2A	0.01567152483936687	664	EVI2A	0.01567152483936687	0.0	664	ITGB3	0.01722356183258698	664	ITGB3	0.017223561832586977	3.469446951953614E-18	664	MEF2C	0.015213753232922561	664	MEF2C	0.015213753232922563	1.734723475976807E-18	664	HLA-DPB1	0.01712035610340695	664	HLA-DPB1	0.01712035610340695	0.0	664	CMTM3	0.01892863903085368	664	CMTM3	0.01892863903085368	0.0	664	VAMP8	0.017482517482517484	664	VAMP8	0.01748251748251748	3.469446951953614E-18
665	NDP	0.01567152483936687	665	NDP	0.01567152483936687	0.0	665	ITGB7	0.01722356183258698	665	ITGB7	0.017223561832586977	3.469446951953614E-18	665	ACER1	0.015213753232922561	665	ACER1	0.015213753232922563	1.734723475976807E-18	665	EXTL1	0.01712035610340695	665	EXTL1	0.01712035610340695	0.0	665	CMTM7	0.01892863903085368	665	CMTM7	0.01892863903085368	0.0	665	MMP7	0.017482517482517484	665	MMP7	0.01748251748251748	3.469446951953614E-18
666	RETSAT	0.01567152483936687	666	RETSAT	0.01567152483936687	0.0	666	SUFU	0.01722356183258698	666	SUFU	0.017223561832586977	3.469446951953614E-18	666	CXCR4	0.015213753232922561	666	CXCR4	0.015213753232922563	1.734723475976807E-18	666	GPT	0.01712035610340695	666	GPT	0.01712035610340695	0.0	666	MPC1	0.01892863903085368	666	MPC1	0.01892863903085368	0.0	666	LY86	0.017482517482517484	666	LY86	0.01748251748251748	3.469446951953614E-18
667	SGCD	0.01567152483936687	667	SGCD	0.01567152483936687	0.0	667	LCP1	0.01722356183258698	667	LCP1	0.017223561832586977	3.469446951953614E-18	667	ZNF366	0.015213753232922561	667	ZNF366	0.015213753232922563	1.734723475976807E-18	667	MAN1A1	0.01712035610340695	667	MAN1A1	0.01712035610340695	0.0	667	STAT4	0.01892863903085368	667	STAT4	0.01892863903085368	0.0	667	CTSS	0.017482517482517484	667	CTSS	0.01748251748251748	3.469446951953614E-18
668	ST3GAL6	0.01567152483936687	668	ST3GAL6	0.01567152483936687	0.0	668	TTYH2	0.01722356183258698	668	TTYH2	0.017223561832586977	3.469446951953614E-18	668	CATSPER1	0.015213753232922561	668	CATSPER1	0.015213753232922563	1.734723475976807E-18	668	FCAMR	0.01712035610340695	668	FCAMR	0.01712035610340695	0.0	668	TSPAN13	0.01892863903085368	668	TSPAN13	0.01892863903085368	0.0	668	IL24	0.017482517482517484	668	IL24	0.01748251748251748	3.469446951953614E-18
669	ANKRD34A	0.01567152483936687	669	ANKRD34A	0.01567152483936687	0.0	669	TBXAS1	0.01722356183258698	669	TBXAS1	0.017223561832586977	3.469446951953614E-18	669	PLEKHO1	0.015213753232922561	669	PLEKHO1	0.015213753232922563	1.734723475976807E-18	669	CTLA4	0.01712035610340695	669	CTLA4	0.01712035610340695	0.0	669	CLEC5A	0.01892863903085368	669	CLEC5A	0.01892863903085368	0.0	669	ATP6AP1	0.017482517482517484	669	ATP6AP1	0.01748251748251748	3.469446951953614E-18
670	SIL1	0.01567152483936687	670	SIL1	0.01567152483936687	0.0	670	MBD6	0.01722356183258698	670	MBD6	0.017223561832586977	3.469446951953614E-18	670	NRP1	0.015213753232922561	670	NRP1	0.015213753232922563	1.734723475976807E-18	670	B9D2	0.01712035610340695	670	B9D2	0.01712035610340695	0.0	670	FGR	0.01892863903085368	670	FGR	0.01892863903085368	0.0	670	CBFA2T3	0.017482517482517484	670	CBFA2T3	0.01748251748251748	3.469446951953614E-18
671	CCL14	0.01567152483936687	671	CCL14	0.01567152483936687	0.0	671	KDM7A	0.01722356183258698	671	KDM7A	0.017223561832586977	3.469446951953614E-18	671	NRP2	0.015213753232922561	671	NRP2	0.015213753232922563	1.734723475976807E-18	671	THEMIS2	0.01712035610340695	671	THEMIS2	0.01712035610340695	0.0	671	PLD1	0.01892863903085368	671	PLD1	0.01892863903085368	0.0	671	ATP6AP2	0.017482517482517484	671	ATP6AP2	0.01748251748251748	3.469446951953614E-18
672	ADTRP	0.01567152483936687	672	ADTRP	0.01567152483936687	0.0	672	CMTM3	0.01722356183258698	672	CMTM3	0.017223561832586977	3.469446951953614E-18	672	COX14	0.015213753232922561	672	COX14	0.015213753232922563	1.734723475976807E-18	672	GBP3	0.01712035610340695	672	GBP3	0.01712035610340695	0.0	672	HPSE	0.01892863903085368	672	HPSE	0.01892863903085368	0.0	672	ANKRD44	0.017482517482517484	672	ANKRD44	0.01748251748251748	3.469446951953614E-18
673	WDR93	0.01567152483936687	673	WDR93	0.01567152483936687	0.0	673	CMTM7	0.01722356183258698	673	CMTM7	0.017223561832586977	3.469446951953614E-18	673	ZNFX1	0.015213753232922561	673	ZNFX1	0.015213753232922563	1.734723475976807E-18	673	GBP1	0.01712035610340695	673	GBP1	0.01712035610340695	0.0	673	PXDC1	0.01892863903085368	673	PXDC1	0.01892863903085368	0.0	673	AK8	0.017482517482517484	673	AK8	0.01748251748251748	3.469446951953614E-18
674	SYNGR2	0.01567152483936687	674	SYNGR2	0.01567152483936687	0.0	674	ZNF396	0.01722356183258698	674	ZNF396	0.017223561832586977	3.469446951953614E-18	674	FUT6	0.015213753232922561	674	FUT6	0.015213753232922563	1.734723475976807E-18	674	GBP4	0.01712035610340695	674	GBP4	0.01712035610340695	0.0	674	ELMO1	0.01892863903085368	674	ELMO1	0.01892863903085368	0.0	674	CRYL1	0.017482517482517484	674	CRYL1	0.01748251748251748	3.469446951953614E-18
675	CLEC12A	0.01567152483936687	675	CLEC12A	0.01567152483936687	0.0	675	MPC1	0.01722356183258698	675	MPC1	0.017223561832586977	3.469446951953614E-18	675	CTBS	0.015213753232922561	675	CTBS	0.015213753232922563	1.734723475976807E-18	675	HERC1	0.01712035610340695	675	HERC1	0.01712035610340695	0.0	675	ELMO3	0.01892863903085368	675	ELMO3	0.01892863903085368	0.0	675	JAK1	0.017482517482517484	675	JAK1	0.01748251748251748	3.469446951953614E-18
676	CPED1	0.01567152483936687	676	CPED1	0.01567152483936687	0.0	676	STAT4	0.01722356183258698	676	STAT4	0.017223561832586977	3.469446951953614E-18	676	SYTL4	0.015213753232922561	676	SYTL4	0.015213753232922563	1.734723475976807E-18	676	TNFSF4	0.01712035610340695	676	TNFSF4	0.01712035610340695	0.0	676	SNX3	0.01892863903085368	676	SNX3	0.01892863903085368	0.0	676	AQP9	0.017482517482517484	676	AQP9	0.01748251748251748	3.469446951953614E-18
677	HAVCR2	0.01567152483936687	677	HAVCR2	0.01567152483936687	0.0	677	SLC25A19	0.01722356183258698	677	SLC25A19	0.017223561832586977	3.469446951953614E-18	677	FLVCR2	0.015213753232922561	677	FLVCR2	0.015213753232922563	1.734723475976807E-18	677	CCR1	0.01712035610340695	677	CCR1	0.01712035610340695	0.0	677	SECTM1	0.01892863903085368	677	SECTM1	0.01892863903085368	0.0	677	CCL20	0.017482517482517484	677	CCL20	0.01748251748251748	3.469446951953614E-18
678	CHIA	0.01567152483936687	678	CHIA	0.01567152483936687	0.0	678	RASAL3	0.01722356183258698	678	RASAL3	0.017223561832586977	3.469446951953614E-18	678	OSBPL5	0.015213753232922561	678	OSBPL5	0.015213753232922563	1.734723475976807E-18	678	CCR5	0.01712035610340695	678	CCR5	0.01712035610340695	0.0	678	CMTM2	0.01892863903085368	678	CMTM2	0.01892863903085368	0.0	678	GCSAML	0.017482517482517484	678	GCSAML	0.01748251748251748	3.469446951953614E-18
679	SLC18B1	0.01567152483936687	679	SLC18B1	0.01567152483936687	0.0	679	CLEC5A	0.01722356183258698	679	CLEC5A	0.017223561832586977	3.469446951953614E-18	679	RAMP1	0.015213753232922561	679	RAMP1	0.015213753232922563	1.734723475976807E-18	679	CD2	0.01712035610340695	679	CD2	0.01712035610340695	0.0	679	YPEL2	0.01892863903085368	679	YPEL2	0.01892863903085368	0.0	679	ST20	0.017482517482517484	679	ST20	0.01748251748251748	3.469446951953614E-18
680	HCFC2	0.01567152483936687	680	HCFC2	0.01567152483936687	0.0	680	FGR	0.01722356183258698	680	FGR	0.017223561832586977	3.469446951953614E-18	680	TMEM229B	0.015213753232922561	680	TMEM229B	0.015213753232922563	1.734723475976807E-18	680	CCR7	0.01712035610340695	680	CCR7	0.01712035610340695	0.0	680	CLDN1	0.01892863903085368	680	CLDN1	0.01892863903085368	0.0	680	ALPK1	0.017482517482517484	680	ALPK1	0.01748251748251748	3.469446951953614E-18
681	CMPK1	0.01567152483936687	681	CMPK1	0.01567152483936687	0.0	681	PLD1	0.01722356183258698	681	PLD1	0.017223561832586977	3.469446951953614E-18	681	RNF19B	0.015213753232922561	681	RNF19B	0.015213753232922563	1.734723475976807E-18	681	DOCK10	0.01712035610340695	681	DOCK10	0.01712035610340695	0.0	681	ORAI2	0.01892863903085368	681	ORAI2	0.01892863903085368	0.0	681	DOCK8	0.017482517482517484	681	DOCK8	0.01748251748251748	3.469446951953614E-18
682	RFTN2	0.01567152483936687	682	RFTN2	0.01567152483936687	0.0	682	HPSE	0.01722356183258698	682	HPSE	0.017223561832586977	3.469446951953614E-18	682	SLC41A2	0.015213753232922561	682	SLC41A2	0.015213753232922563	1.734723475976807E-18	682	DOCK11	0.01712035610340695	682	DOCK11	0.01712035610340695	0.0	682	GALNT5	0.01892863903085368	682	GALNT5	0.01892863903085368	0.0	682	C2CD2L	0.017482517482517484	682	C2CD2L	0.01748251748251748	3.469446951953614E-18
683	RFTN1	0.01567152483936687	683	RFTN1	0.01567152483936687	0.0	683	CLECL1	0.01722356183258698	683	CLECL1	0.017223561832586977	3.469446951953614E-18	683	CSF1	0.015213753232922561	683	CSF1	0.015213753232922563	1.734723475976807E-18	683	SLA2	0.01712035610340695	683	SLA2	0.01712035610340695	0.0	683	C8B	0.01892863903085368	683	C8B	0.01892863903085368	0.0	683	ADORA3	0.017482517482517484	683	ADORA3	0.01748251748251748	3.469446951953614E-18
684	DGKI	0.01567152483936687	684	DGKI	0.01567152483936687	0.0	684	PXDC1	0.01722356183258698	684	PXDC1	0.017223561832586977	3.469446951953614E-18	684	CSF3	0.015213753232922561	684	CSF3	0.015213753232922563	1.734723475976807E-18	684	CD83	0.01712035610340695	684	CD83	0.01712035610340695	0.0	684	FAM78A	0.01892863903085368	684	FAM78A	0.01892863903085368	0.0	684	TNRC18	0.017482517482517484	684	TNRC18	0.01748251748251748	3.469446951953614E-18
685	ZBP1	0.01567152483936687	685	ZBP1	0.01567152483936687	0.0	685	GNG2	0.01722356183258698	685	GNG2	0.017223561832586977	3.469446951953614E-18	685	GPR68	0.015213753232922561	685	GPR68	0.015213753232922563	1.734723475976807E-18	685	CD84	0.01712035610340695	685	CD84	0.01712035610340695	0.0	685	ANXA2R	0.01892863903085368	685	ANXA2R	0.01892863903085368	0.0	685	C16orf86	0.017482517482517484	685	C16orf86	0.01748251748251748	3.469446951953614E-18
686	TDRD10	0.01567152483936687	686	TDRD10	0.01567152483936687	0.0	686	ELMO1	0.01722356183258698	686	ELMO1	0.017223561832586977	3.469446951953614E-18	686	CD300LB	0.015213753232922561	686	CD300LB	0.015213753232922563	1.734723475976807E-18	686	CD86	0.01712035610340695	686	CD86	0.01712035610340695	0.0	686	CLEC10A	0.01892863903085368	686	CLEC10A	0.01892863903085368	0.0	686	PARP9	0.017482517482517484	686	PARP9	0.01748251748251748	3.469446951953614E-18
687	LIX1L	0.01567152483936687	687	LIX1L	0.01567152483936687	0.0	687	SNX3	0.01722356183258698	687	SNX3	0.017223561832586977	3.469446951953614E-18	687	ERAP1	0.015213753232922561	687	ERAP1	0.015213753232922563	1.734723475976807E-18	687	HBEGF	0.01712035610340695	687	HBEGF	0.01712035610340695	0.0	687	PI4KB	0.01892863903085368	687	PI4KB	0.01892863903085368	0.0	687	CCR3	0.017482517482517484	687	CCR3	0.01748251748251748	3.469446951953614E-18
688	KCNJ5	0.01567152483936687	688	KCNJ5	0.01567152483936687	0.0	688	CYB5R4	0.01722356183258698	688	CYB5R4	0.017223561832586977	3.469446951953614E-18	688	HSPB7	0.015213753232922561	688	HSPB7	0.015213753232922563	1.734723475976807E-18	688	BEAN1	0.01712035610340695	688	BEAN1	0.01712035610340695	0.0	688	FILIP1L	0.01892863903085368	688	FILIP1L	0.01892863903085368	0.0	688	DDO	0.017482517482517484	688	DDO	0.01748251748251748	3.469446951953614E-18
689	MXI1	0.01567152483936687	689	MXI1	0.01567152483936687	0.0	689	SECTM1	0.01722356183258698	689	SECTM1	0.017223561832586977	3.469446951953614E-18	689	TREM2	0.015213753232922561	689	TREM2	0.015213753232922563	1.734723475976807E-18	689	RGS8	0.01712035610340695	689	RGS8	0.01712035610340695	0.0	689	ZFHX3	0.01892863903085368	689	ZFHX3	0.01892863903085368	0.0	689	IL13RA1	0.017482517482517484	689	IL13RA1	0.01748251748251748	3.469446951953614E-18
690	TMEM26	0.01567152483936687	690	TMEM26	0.01567152483936687	0.0	690	YPEL2	0.01722356183258698	690	YPEL2	0.017223561832586977	3.469446951953614E-18	690	ANXA2	0.015213753232922561	690	ANXA2	0.015213753232922563	1.734723475976807E-18	690	FRMD8	0.01712035610340695	690	FRMD8	0.01712035610340695	0.0	690	PGAM2	0.01892863903085368	690	PGAM2	0.01892863903085368	0.0	690	CST6	0.017482517482517484	690	CST6	0.01748251748251748	3.469446951953614E-18
691	ZDHHC14	0.01567152483936687	691	ZDHHC14	0.01567152483936687	0.0	691	CD200R1	0.01722356183258698	691	CD200R1	0.017223561832586977	3.469446951953614E-18	691	LAMB3	0.015213753232922561	691	LAMB3	0.015213753232922563	1.734723475976807E-18	691	CD68	0.01712035610340695	691	CD68	0.01712035610340695	0.0	691	MXD1	0.01892863903085368	691	MXD1	0.01892863903085368	0.0	691	TIE1	0.017482517482517484	691	TIE1	0.01748251748251748	3.469446951953614E-18
692	JPH2	0.01567152483936687	692	JPH2	0.01567152483936687	0.0	692	PLXDC2	0.01722356183258698	692	PLXDC2	0.017223561832586977	3.469446951953614E-18	692	LAYN	0.015213753232922561	692	LAYN	0.015213753232922563	1.734723475976807E-18	692	PLXNA2	0.01712035610340695	692	PLXNA2	0.01712035610340695	0.0	692	TMEM150A	0.01892863903085368	692	TMEM150A	0.01892863903085368	0.0	692	KLRF1	0.017482517482517484	692	KLRF1	0.01748251748251748	3.469446951953614E-18
693	ADAM28	0.01567152483936687	693	ADAM28	0.01567152483936687	0.0	693	GALNT4	0.01722356183258698	693	GALNT4	0.017223561832586977	3.469446951953614E-18	693	TXNRD1	0.015213753232922561	693	TXNRD1	0.015213753232922563	1.734723475976807E-18	693	C1orf162	0.01712035610340695	693	C1orf162	0.01712035610340695	0.0	693	TNFSF9	0.01892863903085368	693	TNFSF9	0.01892863903085368	0.0	693	SLC10A3	0.017482517482517484	693	SLC10A3	0.01748251748251748	3.469446951953614E-18
694	PAPPA	0.01567152483936687	694	PAPPA	0.01567152483936687	0.0	694	FAM78A	0.01722356183258698	694	FAM78A	0.017223561832586977	3.469446951953614E-18	694	G0S2	0.015213753232922561	694	G0S2	0.015213753232922563	1.734723475976807E-18	694	CREG1	0.01712035610340695	694	CREG1	0.01712035610340695	0.0	694	ADAP2	0.01892863903085368	694	ADAP2	0.01892863903085368	0.0	694	TMEM38B	0.017482517482517484	694	TMEM38B	0.01748251748251748	3.469446951953614E-18
695	SERP2	0.01567152483936687	695	SERP2	0.01567152483936687	0.0	695	ANXA2R	0.01722356183258698	695	ANXA2R	0.017223561832586977	3.469446951953614E-18	695	ANPEP	0.015213753232922561	695	ANPEP	0.015213753232922563	1.734723475976807E-18	695	S100Z	0.01712035610340695	695	S100Z	0.01712035610340695	0.0	695	SCEL	0.01892863903085368	695	SCEL	0.01892863903085368	0.0	695	CEACAM21	0.017482517482517484	695	CEACAM21	0.01748251748251748	3.469446951953614E-18
696	MS4A4A	0.01567152483936687	696	MS4A4A	0.01567152483936687	0.0	696	CLK1	0.01722356183258698	696	CLK1	0.017223561832586977	3.469446951953614E-18	696	VNN3	0.015213753232922561	696	VNN3	0.015213753232922563	1.734723475976807E-18	696	ZMYND15	0.01712035610340695	696	ZMYND15	0.01712035610340695	0.0	696	LYST	0.01892863903085368	696	LYST	0.01892863903085368	0.0	696	FTH1	0.017482517482517484	696	FTH1	0.01748251748251748	3.469446951953614E-18
697	CYP4X1	0.01567152483936687	697	CYP4X1	0.01567152483936687	0.0	697	CLEC10A	0.01722356183258698	697	CLEC10A	0.017223561832586977	3.469446951953614E-18	697	TIFA	0.015213753232922561	697	TIFA	0.015213753232922563	1.734723475976807E-18	697	HAVCR1	0.01712035610340695	697	HAVCR1	0.01712035610340695	0.0	697	LYSMD2	0.01892863903085368	697	LYSMD2	0.01892863903085368	0.0	697	AGRP	0.017482517482517484	697	AGRP	0.01748251748251748	3.469446951953614E-18
698	NPL	0.01567152483936687	698	NPL	0.01567152483936687	0.0	698	FILIP1L	0.01722356183258698	698	FILIP1L	0.017223561832586977	3.469446951953614E-18	698	GLTPD2	0.015213753232922561	698	GLTPD2	0.015213753232922563	1.734723475976807E-18	698	AOAH	0.01712035610340695	698	AOAH	0.01712035610340695	0.0	698	KAT2B	0.01892863903085368	698	KAT2B	0.01892863903085368	0.0	698	PDGFRA	0.017482517482517484	698	PDGFRA	0.01748251748251748	3.469446951953614E-18
699	CD300E	0.01567152483936687	699	CD300E	0.01567152483936687	0.0	699	ZFHX3	0.01722356183258698	699	ZFHX3	0.017223561832586977	3.469446951953614E-18	699	PLA2G15	0.015213753232922561	699	PLA2G15	0.015213753232922563	1.734723475976807E-18	699	MBP	0.01712035610340695	699	MBP	0.01712035610340695	0.0	699	TRIM69	0.01892863903085368	699	TRIM69	0.01892863903085368	0.0	699	RARRES1	0.017482517482517484	699	RARRES1	0.01748251748251748	3.469446951953614E-18
700	FFAR4	0.01567152483936687	700	FFAR4	0.01567152483936687	0.0	700	PGAM2	0.01722356183258698	700	PGAM2	0.017223561832586977	3.469446951953614E-18	700	ALDH1A2	0.015213753232922561	700	ALDH1A2	0.015213753232922563	1.734723475976807E-18	700	MTR	0.01712035610340695	700	MTR	0.01712035610340695	0.0	700	LAMP3	0.01892863903085368	700	LAMP3	0.01892863903085368	0.0	700	CCDC85A	0.017482517482517484	700	CCDC85A	0.01748251748251748	3.469446951953614E-18
701	MFAP5	0.01567152483936687	701	MFAP5	0.01567152483936687	0.0	701	MXD1	0.01722356183258698	701	MXD1	0.017223561832586977	3.469446951953614E-18	701	CYP4B1	0.015213753232922561	701	CYP4B1	0.015213753232922563	1.734723475976807E-18	701	PGA3	0.01712035610340695	701	PGA3	0.01712035610340695	0.0	701	ITK	0.01892863903085368	701	ITK	0.01892863903085368	0.0	701	CORO1A	0.017482517482517484	701	CORO1A	0.01748251748251748	3.469446951953614E-18
702	ANGPTL2	0.01567152483936687	702	ANGPTL2	0.01567152483936687	0.0	702	NLRP3	0.01722356183258698	702	NLRP3	0.017223561832586977	3.469446951953614E-18	702	SH3TC2	0.015213753232922561	702	SH3TC2	0.015213753232922563	1.734723475976807E-18	702	HVCN1	0.01712035610340695	702	HVCN1	0.01712035610340695	0.0	702	AMIGO1	0.01892863903085368	702	AMIGO1	0.01892863903085368	0.0	702	DEFA1B	0.017482517482517484	702	DEFA1B	0.01748251748251748	3.469446951953614E-18
703	FDX1	0.01567152483936687	703	FDX1	0.01567152483936687	0.0	703	BTLA	0.01722356183258698	703	BTLA	0.017223561832586977	3.469446951953614E-18	703	ANXA1	0.015213753232922561	703	ANXA1	0.015213753232922563	1.734723475976807E-18	703	ZNF710	0.01712035610340695	703	ZNF710	0.01712035610340695	0.0	703	IGIP	0.01892863903085368	703	IGIP	0.01892863903085368	0.0	703	FAS	0.017482517482517484	703	FAS	0.01748251748251748	3.469446951953614E-18
704	ACTA2	0.01567152483936687	704	ACTA2	0.01567152483936687	0.0	704	TNFSF9	0.01722356183258698	704	TNFSF9	0.017223561832586977	3.469446951953614E-18	704	TREML4	0.015213753232922561	704	TREML4	0.015213753232922563	1.734723475976807E-18	704	TOM1L2	0.01712035610340695	704	TOM1L2	0.01712035610340695	0.0	704	MFSD1	0.01892863903085368	704	MFSD1	0.01892863903085368	0.0	704	MLLT6	0.017482517482517484	704	MLLT6	0.01748251748251748	3.469446951953614E-18
705	GSTM3	0.01567152483936687	705	GSTM3	0.01567152483936687	0.0	705	ADAP2	0.01722356183258698	705	ADAP2	0.017223561832586977	3.469446951953614E-18	705	TMEM138	0.015213753232922561	705	TMEM138	0.015213753232922563	1.734723475976807E-18	705	SLFN5	0.01712035610340695	705	SLFN5	0.01712035610340695	0.0	705	CYBB	0.01892863903085368	705	CYBB	0.01892863903085368	0.0	705	TMBIM4	0.017482517482517484	705	TMBIM4	0.01748251748251748	3.469446951953614E-18
706	RASGRP4	0.01567152483936687	706	RASGRP4	0.01567152483936687	0.0	706	LYST	0.01722356183258698	706	LYST	0.017223561832586977	3.469446951953614E-18	706	ZNF230	0.015213753232922561	706	ZNF230	0.015213753232922563	1.734723475976807E-18	706	TMOD2	0.01712035610340695	706	TMOD2	0.01712035610340695	0.0	706	MTSS1	0.01892863903085368	706	MTSS1	0.01892863903085368	0.0	706	IL15RA	0.017482517482517484	706	IL15RA	0.01748251748251748	3.469446951953614E-18
707	UBE2D4	0.01567152483936687	707	UBE2D4	0.01567152483936687	0.0	707	LYSMD2	0.01722356183258698	707	LYSMD2	0.017223561832586977	3.469446951953614E-18	707	TREM1	0.015213753232922561	707	TREM1	0.015213753232922563	1.734723475976807E-18	707	MYOM1	0.01712035610340695	707	MYOM1	0.01712035610340695	0.0	707	AQP6	0.01892863903085368	707	AQP6	0.01892863903085368	0.0	707	CASP8	0.017482517482517484	707	CASP8	0.01748251748251748	3.469446951953614E-18
708	EDNRB	0.01567152483936687	708	EDNRB	0.01567152483936687	0.0	708	CSTA	0.01722356183258698	708	CSTA	0.017223561832586977	3.469446951953614E-18	708	ITPRIP	0.015213753232922561	708	ITPRIP	0.015213753232922563	1.734723475976807E-18	708	CASP10	0.01712035610340695	708	CASP10	0.01712035610340695	0.0	708	CLEC4E	0.01892863903085368	708	CLEC4E	0.01892863903085368	0.0	708	PURA	0.017482517482517484	708	PURA	0.01748251748251748	3.469446951953614E-18
709	APOH	0.01567152483936687	709	APOH	0.01567152483936687	0.0	709	KAT2B	0.01722356183258698	709	KAT2B	0.017223561832586977	3.469446951953614E-18	709	GAS2L1	0.015213753232922561	709	GAS2L1	0.015213753232922563	1.734723475976807E-18	709	LIG4	0.01712035610340695	709	LIG4	0.01712035610340695	0.0	709	GADD45A	0.01892863903085368	709	GADD45A	0.01892863903085368	0.0	709	BCL6	0.017482517482517484	709	BCL6	0.01748251748251748	3.469446951953614E-18
710	FAM151B	0.01567152483936687	710	FAM151B	0.01567152483936687	0.0	710	TRIM69	0.01722356183258698	710	TRIM69	0.017223561832586977	3.469446951953614E-18	710	NCOA3	0.015213753232922561	710	NCOA3	0.015213753232922563	1.734723475976807E-18	710	STK17A	0.01712035610340695	710	STK17A	0.01712035610340695	0.0	710	MPP4	0.01892863903085368	710	MPP4	0.01892863903085368	0.0	710	OLAH	0.017482517482517484	710	OLAH	0.01748251748251748	3.469446951953614E-18
711	KDSR	0.01567152483936687	711	KDSR	0.01567152483936687	0.0	711	LAMP3	0.01722356183258698	711	LAMP3	0.017223561832586977	3.469446951953614E-18	711	ZNF438	0.015213753232922561	711	ZNF438	0.015213753232922563	1.734723475976807E-18	711	EHBP1L1	0.01712035610340695	711	EHBP1L1	0.01712035610340695	0.0	711	HLA-DPB1	0.01892863903085368	711	HLA-DPB1	0.01892863903085368	0.0	711	BCL2	0.017482517482517484	711	BCL2	0.01748251748251748	3.469446951953614E-18
712	KCNK13	0.01567152483936687	712	KCNK13	0.01567152483936687	0.0	712	OMG	0.01722356183258698	712	OMG	0.017223561832586977	3.469446951953614E-18	712	FGD2	0.015213753232922561	712	FGD2	0.015213753232922563	1.734723475976807E-18	712	CCDC62	0.01712035610340695	712	CCDC62	0.01712035610340695	0.0	712	SPEF2	0.01892863903085368	712	SPEF2	0.01892863903085368	0.0	712	MAN2B2	0.017482517482517484	712	MAN2B2	0.01748251748251748	3.469446951953614E-18
713	TM4SF20	0.01567152483936687	713	TM4SF20	0.01567152483936687	0.0	713	AATK	0.01722356183258698	713	AATK	0.017223561832586977	3.469446951953614E-18	713	AGAP2	0.015213753232922561	713	AGAP2	0.015213753232922563	1.734723475976807E-18	713	CACNA2D4	0.01712035610340695	713	CACNA2D4	0.01712035610340695	0.0	713	GPT	0.01892863903085368	713	GPT	0.01892863903085368	0.0	713	PLK3	0.017482517482517484	713	PLK3	0.01748251748251748	3.469446951953614E-18
714	CTSH	0.01567152483936687	714	CTSH	0.01567152483936687	0.0	714	KY	0.01722356183258698	714	KY	0.017223561832586977	3.469446951953614E-18	714	TM6SF1	0.015213753232922561	714	TM6SF1	0.015213753232922563	1.734723475976807E-18	714	KCTD18	0.01712035610340695	714	KCTD18	0.01712035610340695	0.0	714	FRS3	0.01892863903085368	714	FRS3	0.01892863903085368	0.0	714	CIB1	0.017482517482517484	714	CIB1	0.01748251748251748	3.469446951953614E-18
715	LEKR1	0.01567152483936687	715	LEKR1	0.01567152483936687	0.0	715	NAGPA	0.01722356183258698	715	NAGPA	0.017223561832586977	3.469446951953614E-18	715	AC079210.1	0.015213753232922561	715	AC079210.1	0.015213753232922563	1.734723475976807E-18	715	EPSTI1	0.01712035610340695	715	EPSTI1	0.01712035610340695	0.0	715	B9D2	0.01892863903085368	715	B9D2	0.01892863903085368	0.0	715	CCL5	0.017482517482517484	715	CCL5	0.01748251748251748	3.469446951953614E-18
716	STARD13	0.01567152483936687	716	STARD13	0.01567152483936687	0.0	716	IGIP	0.01722356183258698	716	IGIP	0.017223561832586977	3.469446951953614E-18	716	FBXW5	0.015213753232922561	716	FBXW5	0.015213753232922563	1.734723475976807E-18	716	BATF	0.01712035610340695	716	BATF	0.01712035610340695	0.0	716	MAML3	0.01892863903085368	716	MAML3	0.01892863903085368	0.0	716	PDE7B	0.017482517482517484	716	PDE7B	0.01748251748251748	3.469446951953614E-18
717	FBXO32	0.01567152483936687	717	FBXO32	0.01567152483936687	0.0	717	CD244	0.01722356183258698	717	CD244	0.017223561832586977	3.469446951953614E-18	717	CCRL2	0.015213753232922561	717	CCRL2	0.015213753232922563	1.734723475976807E-18	717	C1QC	0.01712035610340695	717	C1QC	0.01712035610340695	0.0	717	THEMIS2	0.01892863903085368	717	THEMIS2	0.01892863903085368	0.0	717	KRT24	0.017482517482517484	717	KRT24	0.01748251748251748	3.469446951953614E-18
718	TK2	0.01567152483936687	718	TK2	0.01567152483936687	0.0	718	CXorf38	0.01722356183258698	718	CXorf38	0.017223561832586977	3.469446951953614E-18	718	SLC23A2	0.015213753232922561	718	SLC23A2	0.015213753232922563	1.734723475976807E-18	718	CLDN16	0.01712035610340695	718	CLDN16	0.01712035610340695	0.0	718	GBP3	0.01892863903085368	718	GBP3	0.01892863903085368	0.0	718	SERPINB1	0.017482517482517484	718	SERPINB1	0.01748251748251748	3.469446951953614E-18
719	ZNF428	0.01567152483936687	719	ZNF428	0.01567152483936687	0.0	719	SOX6	0.01722356183258698	719	SOX6	0.017223561832586977	3.469446951953614E-18	719	SLAMF7	0.015213753232922561	719	SLAMF7	0.015213753232922563	1.734723475976807E-18	719	C1QB	0.01712035610340695	719	C1QB	0.01712035610340695	0.0	719	GBP2	0.01892863903085368	719	GBP2	0.01892863903085368	0.0	719	SERPINB2	0.017482517482517484	719	SERPINB2	0.01748251748251748	3.469446951953614E-18
720	EPDR1	0.01567152483936687	720	EPDR1	0.01567152483936687	0.0	720	LOXL3	0.01722356183258698	720	LOXL3	0.017223561832586977	3.469446951953614E-18	720	SLAMF6	0.015213753232922561	720	SLAMF6	0.015213753232922563	1.734723475976807E-18	720	PREX1	0.01712035610340695	720	PREX1	0.01712035610340695	0.0	720	GBP1	0.01892863903085368	720	GBP1	0.01892863903085368	0.0	720	SERPINB6	0.017482517482517484	720	SERPINB6	0.01748251748251748	3.469446951953614E-18
721	THEM6	0.01567152483936687	721	THEM6	0.01567152483936687	0.0	721	CD69	0.01722356183258698	721	CD69	0.017223561832586977	3.469446951953614E-18	721	SLAMF1	0.015213753232922561	721	SLAMF1	0.015213753232922563	1.734723475976807E-18	721	PTGER2	0.01712035610340695	721	PTGER2	0.01712035610340695	0.0	721	GBP4	0.01892863903085368	721	GBP4	0.01892863903085368	0.0	721	NEDD9	0.017482517482517484	721	NEDD9	0.01748251748251748	3.469446951953614E-18
722	MBOAT4	0.01567152483936687	722	MBOAT4	0.01567152483936687	0.0	722	MFSD1	0.01722356183258698	722	MFSD1	0.017223561832586977	3.469446951953614E-18	722	CYP4A22	0.015213753232922561	722	CYP4A22	0.015213753232922563	1.734723475976807E-18	722	PIK3R6	0.01712035610340695	722	PIK3R6	0.01712035610340695	0.0	722	CYP19A1	0.01892863903085368	722	CYP19A1	0.01892863903085368	0.0	722	CLEC12B	0.017482517482517484	722	CLEC12B	0.01748251748251748	3.469446951953614E-18
723	GABARAP	0.01567152483936687	723	GABARAP	0.01567152483936687	0.0	723	CYBB	0.01722356183258698	723	CYBB	0.017223561832586977	3.469446951953614E-18	723	TGFBR2	0.015213753232922561	723	TGFBR2	0.015213753232922563	1.734723475976807E-18	723	OS9	0.01712035610340695	723	OS9	0.01712035610340695	0.0	723	STK38	0.01892863903085368	723	STK38	0.01892863903085368	0.0	723	ANKRD55	0.017482517482517484	723	ANKRD55	0.01748251748251748	3.469446951953614E-18
724	GPRC5A	0.01567152483936687	724	GPRC5A	0.01567152483936687	0.0	724	CRHBP	0.01722356183258698	724	CRHBP	0.017223561832586977	3.469446951953614E-18	724	SH3RF2	0.015213753232922561	724	SH3RF2	0.015213753232922563	1.734723475976807E-18	724	FAM177B	0.01712035610340695	724	FAM177B	0.01712035610340695	0.0	724	VMAC	0.01892863903085368	724	VMAC	0.01892863903085368	0.0	724	SPRYD3	0.017482517482517484	724	SPRYD3	0.01748251748251748	3.469446951953614E-18
725	LONRF3	0.01567152483936687	725	LONRF3	0.01567152483936687	0.0	725	CMTM1	0.01722356183258698	725	CMTM1	0.017223561832586977	3.469446951953614E-18	725	SLC47A2	0.015213753232922561	725	SLC47A2	0.015213753232922563	1.734723475976807E-18	725	ASAH1	0.01712035610340695	725	ASAH1	0.01712035610340695	0.0	725	CCR1	0.01892863903085368	725	CCR1	0.01892863903085368	0.0	725	ST18	0.017482517482517484	725	ST18	0.01748251748251748	3.469446951953614E-18
726	TREML1	0.01567152483936687	726	TREML1	0.01567152483936687	0.0	726	AQP6	0.01722356183258698	726	AQP6	0.017223561832586977	3.469446951953614E-18	726	FCRL3	0.015213753232922561	726	FCRL3	0.015213753232922563	1.734723475976807E-18	726	HCAR3	0.01712035610340695	726	HCAR3	0.01712035610340695	0.0	726	CCR9	0.01892863903085368	726	CCR9	0.01892863903085368	0.0	726	KLHDC1	0.017482517482517484	726	KLHDC1	0.01748251748251748	3.469446951953614E-18
727	ALDH3A1	0.01567152483936687	727	ALDH3A1	0.01567152483936687	0.0	727	CLEC4E	0.01722356183258698	727	CLEC4E	0.017223561832586977	3.469446951953614E-18	727	MAP3K7CL	0.015213753232922561	727	MAP3K7CL	0.015213753232922563	1.734723475976807E-18	727	HCAR2	0.01712035610340695	727	HCAR2	0.01712035610340695	0.0	727	DOCK10	0.01892863903085368	727	DOCK10	0.01892863903085368	0.0	727	LANCL3	0.017482517482517484	727	LANCL3	0.01748251748251748	3.469446951953614E-18
728	HEBP1	0.01567152483936687	728	HEBP1	0.01567152483936687	0.0	728	NOTCH1	0.01722356183258698	728	NOTCH1	0.017223561832586977	3.469446951953614E-18	728	TET2	0.015213753232922561	728	TET2	0.015213753232922563	1.734723475976807E-18	728	XAF1	0.01712035610340695	728	XAF1	0.01712035610340695	0.0	728	CD86	0.01892863903085368	728	CD86	0.01892863903085368	0.0	728	ZZEF1	0.017482517482517484	728	ZZEF1	0.01748251748251748	3.469446951953614E-18
729	ALG14	0.01567152483936687	729	ALG14	0.01567152483936687	0.0	729	RAPGEF1	0.01722356183258698	729	RAPGEF1	0.017223561832586977	3.469446951953614E-18	729	TECPR1	0.015213753232922561	729	TECPR1	0.015213753232922563	1.734723475976807E-18	729	TLR1	0.01712035610340695	729	TLR1	0.01712035610340695	0.0	729	HBEGF	0.01892863903085368	729	HBEGF	0.01892863903085368	0.0	729	TNFSF13B	0.017482517482517484	729	TNFSF13B	0.01748251748251748	3.469446951953614E-18
730	TMEM150B	0.01567152483936687	730	TMEM150B	0.01567152483936687	0.0	730	HLA-DPB1	0.01722356183258698	730	HLA-DPB1	0.017223561832586977	3.469446951953614E-18	730	CIITA	0.015213753232922561	730	CIITA	0.015213753232922563	1.734723475976807E-18	730	NFATC2	0.01712035610340695	730	NFATC2	0.01712035610340695	0.0	730	BEAN1	0.01892863903085368	730	BEAN1	0.01892863903085368	0.0	730	SPATA13	0.017482517482517484	730	SPATA13	0.01748251748251748	3.469446951953614E-18
731	NTN1	0.01567152483936687	731	NTN1	0.01567152483936687	0.0	731	EXTL1	0.01722356183258698	731	EXTL1	0.017223561832586977	3.469446951953614E-18	731	MGAT1	0.015213753232922561	731	MGAT1	0.015213753232922563	1.734723475976807E-18	731	SOS2	0.01712035610340695	731	SOS2	0.01712035610340695	0.0	731	CD68	0.01892863903085368	731	CD68	0.01892863903085368	0.0	731	SIRT2	0.017482517482517484	731	SIRT2	0.01748251748251748	3.469446951953614E-18
732	ARL8B	0.01567152483936687	732	ARL8B	0.01567152483936687	0.0	732	GPT	0.01722356183258698	732	GPT	0.017223561832586977	3.469446951953614E-18	732	IER5L	0.015213753232922561	732	IER5L	0.015213753232922563	1.734723475976807E-18	732	TICAM1	0.01712035610340695	732	TICAM1	0.01712035610340695	0.0	732	FAM20A	0.01892863903085368	732	FAM20A	0.01892863903085368	0.0	732	SERPINB10	0.017482517482517484	732	SERPINB10	0.01748251748251748	3.469446951953614E-18
733	EGFR	0.01567152483936687	733	EGFR	0.01567152483936687	0.0	733	FCAMR	0.01722356183258698	733	FCAMR	0.017223561832586977	3.469446951953614E-18	733	GLRX	0.015213753232922561	733	GLRX	0.015213753232922563	1.734723475976807E-18	733	TMED5	0.01712035610340695	733	TMED5	0.01712035610340695	0.0	733	GALNT15	0.01892863903085368	733	GALNT15	0.01892863903085368	0.0	733	MED31	0.017482517482517484	733	MED31	0.01748251748251748	3.469446951953614E-18
734	ALOX5AP	0.01567152483936687	734	ALOX5AP	0.01567152483936687	0.0	734	CTLA4	0.01722356183258698	734	CTLA4	0.017223561832586977	3.469446951953614E-18	734	TBKBP1	0.015213753232922561	734	TBKBP1	0.015213753232922563	1.734723475976807E-18	734	SMIM6	0.01712035610340695	734	SMIM6	0.01712035610340695	0.0	734	LRP4	0.01892863903085368	734	LRP4	0.01892863903085368	0.0	734	NCF2	0.017482517482517484	734	NCF2	0.01748251748251748	3.469446951953614E-18
735	SCCPDH	0.01567152483936687	735	SCCPDH	0.01567152483936687	0.0	735	B9D2	0.01722356183258698	735	B9D2	0.017223561832586977	3.469446951953614E-18	735	CHST11	0.015213753232922561	735	CHST11	0.015213753232922563	1.734723475976807E-18	735	SMIM5	0.01712035610340695	735	SMIM5	0.01712035610340695	0.0	735	GALR2	0.01892863903085368	735	GALR2	0.01892863903085368	0.0	735	TLR10	0.017482517482517484	735	TLR10	0.01748251748251748	3.469446951953614E-18
736	CTSW	0.01567152483936687	736	CTSW	0.01567152483936687	0.0	736	MAML3	0.01722356183258698	736	MAML3	0.017223561832586977	3.469446951953614E-18	736	VAMP5	0.015213753232922561	736	VAMP5	0.015213753232922563	1.734723475976807E-18	736	ALG2	0.01712035610340695	736	ALG2	0.01712035610340695	0.0	736	PLXNA3	0.01892863903085368	736	PLXNA3	0.01892863903085368	0.0	736	TBC1D9	0.017482517482517484	736	TBC1D9	0.01748251748251748	3.469446951953614E-18
737	MEF2C	0.01567152483936687	737	MEF2C	0.01567152483936687	0.0	737	THEMIS2	0.01722356183258698	737	THEMIS2	0.017223561832586977	3.469446951953614E-18	737	EBF2	0.015213753232922561	737	EBF2	0.015213753232922563	1.734723475976807E-18	737	REEP1	0.01712035610340695	737	REEP1	0.01712035610340695	0.0	737	PLXNA2	0.01892863903085368	737	PLXNA2	0.01892863903085368	0.0	737	GPR146	0.017482517482517484	737	GPR146	0.01748251748251748	3.469446951953614E-18
738	CXCR4	0.01567152483936687	738	CXCR4	0.01567152483936687	0.0	738	DNAJC5B	0.01722356183258698	738	DNAJC5B	0.017223561832586977	3.469446951953614E-18	738	COL15A1	0.015213753232922561	738	COL15A1	0.015213753232922563	1.734723475976807E-18	738	CYB561A3	0.01712035610340695	738	CYB561A3	0.01712035610340695	0.0	738	GPR50	0.01892863903085368	738	GPR50	0.01892863903085368	0.0	738	TBC1D2	0.017482517482517484	738	TBC1D2	0.01748251748251748	3.469446951953614E-18
739	LRRIQ1	0.01567152483936687	739	LRRIQ1	0.01567152483936687	0.0	739	GBP3	0.01722356183258698	739	GBP3	0.017223561832586977	3.469446951953614E-18	739	VAMP8	0.015213753232922561	739	VAMP8	0.015213753232922563	1.734723475976807E-18	739	CLEC7A	0.01712035610340695	739	CLEC7A	0.01712035610340695	0.0	739	PSCA	0.01892863903085368	739	PSCA	0.01892863903085368	0.0	739	STMN2	0.017482517482517484	739	STMN2	0.01748251748251748	3.469446951953614E-18
740	ZNF366	0.01567152483936687	740	ZNF366	0.01567152483936687	0.0	740	GBP2	0.01722356183258698	740	GBP2	0.017223561832586977	3.469446951953614E-18	740	CD5	0.015213753232922561	740	CD5	0.015213753232922563	1.734723475976807E-18	740	METRNL	0.01712035610340695	740	METRNL	0.01712035610340695	0.0	740	PDE4D	0.01892863903085368	740	PDE4D	0.01892863903085368	0.0	740	IKBIP	0.017482517482517484	740	IKBIP	0.01748251748251748	3.469446951953614E-18
741	CREM	0.01567152483936687	741	CREM	0.01567152483936687	0.0	741	GBP4	0.01722356183258698	741	GBP4	0.017223561832586977	3.469446951953614E-18	741	MUC7	0.015213753232922561	741	MUC7	0.015213753232922563	1.734723475976807E-18	741	SLC22A18AS	0.01712035610340695	741	SLC22A18AS	0.01712035610340695	0.0	741	CREG1	0.01892863903085368	741	CREG1	0.01892863903085368	0.0	741	CDK15	0.017482517482517484	741	CDK15	0.01748251748251748	3.469446951953614E-18
742	FAM180A	0.01567152483936687	742	FAM180A	0.01567152483936687	0.0	742	HERC1	0.01722356183258698	742	HERC1	0.017223561832586977	3.469446951953614E-18	742	MMP7	0.015213753232922561	742	MMP7	0.015213753232922563	1.734723475976807E-18	742	CHRNA6	0.01712035610340695	742	CHRNA6	0.01712035610340695	0.0	742	C1orf210	0.01892863903085368	742	C1orf210	0.01892863903085368	0.0	742	FGF10	0.017482517482517484	742	FGF10	0.01748251748251748	3.469446951953614E-18
743	CATSPER1	0.01567152483936687	743	CATSPER1	0.01567152483936687	0.0	743	VMAC	0.01722356183258698	743	VMAC	0.017223561832586977	3.469446951953614E-18	743	LY86	0.015213753232922561	743	LY86	0.015213753232922563	1.734723475976807E-18	743	RGS16	0.01712035610340695	743	RGS16	0.01712035610340695	0.0	743	ZMYND15	0.01892863903085368	743	ZMYND15	0.01892863903085368	0.0	743	SUCNR1	0.017482517482517484	743	SUCNR1	0.01748251748251748	3.469446951953614E-18
744	IL33	0.01567152483936687	744	IL33	0.01567152483936687	0.0	744	TNFSF4	0.01722356183258698	744	TNFSF4	0.017223561832586977	3.469446951953614E-18	744	FCHO2	0.015213753232922561	744	FCHO2	0.015213753232922563	1.734723475976807E-18	744	RGS12	0.01712035610340695	744	RGS12	0.01712035610340695	0.0	744	PCP4L1	0.01892863903085368	744	PCP4L1	0.01892863903085368	0.0	744	FGF14	0.017482517482517484	744	FGF14	0.01748251748251748	3.469446951953614E-18
745	PLEKHO1	0.01567152483936687	745	PLEKHO1	0.01567152483936687	0.0	745	CCR1	0.01722356183258698	745	CCR1	0.017223561832586977	3.469446951953614E-18	745	CTSS	0.015213753232922561	745	CTSS	0.015213753232922563	1.734723475976807E-18	745	RGS10	0.01712035610340695	745	RGS10	0.01712035610340695	0.0	745	PGA3	0.01892863903085368	745	PGA3	0.01892863903085368	0.0	745	KRT23	0.017482517482517484	745	KRT23	0.01748251748251748	3.469446951953614E-18
746	NRP1	0.01567152483936687	746	NRP1	0.01567152483936687	0.0	746	CCR5	0.01722356183258698	746	CCR5	0.017223561832586977	3.469446951953614E-18	746	IL24	0.015213753232922561	746	IL24	0.015213753232922563	1.734723475976807E-18	746	ID2	0.01712035610340695	746	ID2	0.01712035610340695	0.0	746	HVCN1	0.01892863903085368	746	HVCN1	0.01892863903085368	0.0	746	MTHFR	0.017482517482517484	746	MTHFR	0.01748251748251748	3.469446951953614E-18
747	COX14	0.01567152483936687	747	COX14	0.01567152483936687	0.0	747	CD2	0.01722356183258698	747	CD2	0.017223561832586977	3.469446951953614E-18	747	ASB15	0.015213753232922561	747	ASB15	0.015213753232922563	1.734723475976807E-18	747	CD52	0.01712035610340695	747	CD52	0.01712035610340695	0.0	747	ZNF710	0.01892863903085368	747	ZNF710	0.01892863903085368	0.0	747	UNC13D	0.017482517482517484	747	UNC13D	0.01748251748251748	3.469446951953614E-18
748	ZNFX1	0.01567152483936687	748	ZNFX1	0.01567152483936687	0.0	748	CCR7	0.01722356183258698	748	CCR7	0.017223561832586977	3.469446951953614E-18	748	ATP6AP1	0.015213753232922561	748	ATP6AP1	0.015213753232922563	1.734723475976807E-18	748	CD58	0.01712035610340695	748	CD58	0.01712035610340695	0.0	748	TOM1L2	0.01892863903085368	748	TOM1L2	0.01892863903085368	0.0	748	VCAM1	0.017482517482517484	748	VCAM1	0.01748251748251748	3.469446951953614E-18
749	C6orf89	0.01567152483936687	749	C6orf89	0.01567152483936687	0.0	749	DOCK10	0.01722356183258698	749	DOCK10	0.017223561832586977	3.469446951953614E-18	749	ATP6AP2	0.015213753232922561	749	ATP6AP2	0.015213753232922563	1.734723475976807E-18	749	RAB32	0.01712035610340695	749	RAB32	0.01712035610340695	0.0	749	SLFN5	0.01892863903085368	749	SLFN5	0.01892863903085368	0.0	749	SYNE1	0.017482517482517484	749	SYNE1	0.01748251748251748	3.469446951953614E-18
750	FUT6	0.01567152483936687	750	FUT6	0.01567152483936687	0.0	750	BCAS1	0.01722356183258698	750	BCAS1	0.017223561832586977	3.469446951953614E-18	750	ANKRD44	0.015213753232922561	750	ANKRD44	0.015213753232922563	1.734723475976807E-18	750	C1QA	0.01712035610340695	750	C1QA	0.01712035610340695	0.0	750	TMOD2	0.01892863903085368	750	TMOD2	0.01892863903085368	0.0	750	FAM187B	0.017482517482517484	750	FAM187B	0.01748251748251748	3.469446951953614E-18
751	SYTL5	0.01567152483936687	751	SYTL5	0.01567152483936687	0.0	751	CD83	0.01722356183258698	751	CD83	0.017223561832586977	3.469446951953614E-18	751	AK8	0.015213753232922561	751	AK8	0.015213753232922563	1.734723475976807E-18	751	TTLL11	0.01712035610340695	751	TTLL11	0.01712035610340695	0.0	751	CASP10	0.01892863903085368	751	CASP10	0.01892863903085368	0.0	751	EMP1	0.017482517482517484	751	EMP1	0.01748251748251748	3.469446951953614E-18
752	ADAMTS5	0.01567152483936687	752	ADAMTS5	0.01567152483936687	0.0	752	STARD5	0.01722356183258698	752	STARD5	0.017223561832586977	3.469446951953614E-18	752	CRYL1	0.015213753232922561	752	CRYL1	0.015213753232922563	1.734723475976807E-18	752	RCSD1	0.01712035610340695	752	RCSD1	0.01712035610340695	0.0	752	HPCA	0.01892863903085368	752	HPCA	0.01892863903085368	0.0	752	RP2	0.017482517482517484	752	RP2	0.01748251748251748	3.469446951953614E-18
753	ADAMTS1	0.01567152483936687	753	ADAMTS1	0.01567152483936687	0.0	753	CD84	0.01722356183258698	753	CD84	0.017223561832586977	3.469446951953614E-18	753	JAK1	0.015213753232922561	753	JAK1	0.015213753232922563	1.734723475976807E-18	753	ACAP1	0.01712035610340695	753	ACAP1	0.01712035610340695	0.0	753	EHBP1L1	0.01892863903085368	753	EHBP1L1	0.01892863903085368	0.0	753	RPS18	0.017482517482517484	753	RPS18	0.01748251748251748	3.469446951953614E-18
754	CTBS	0.01567152483936687	754	CTBS	0.01567152483936687	0.0	754	CD86	0.01722356183258698	754	CD86	0.017223561832586977	3.469446951953614E-18	754	ACSM2A	0.015213753232922561	754	ACSM2A	0.015213753232922563	1.734723475976807E-18	754	LRG1	0.01712035610340695	754	LRG1	0.01712035610340695	0.0	754	CCDC62	0.01892863903085368	754	CCDC62	0.01892863903085368	0.0	754	FRMD4B	0.017482517482517484	754	FRMD4B	0.01748251748251748	3.469446951953614E-18
755	DYNLT1	0.01567152483936687	755	DYNLT1	0.01567152483936687	0.0	755	HBEGF	0.01722356183258698	755	HBEGF	0.017223561832586977	3.469446951953614E-18	755	AQP9	0.015213753232922561	755	AQP9	0.015213753232922563	1.734723475976807E-18	755	SELL	0.01712035610340695	755	SELL	0.01712035610340695	0.0	755	EPSTI1	0.01892863903085368	755	EPSTI1	0.01892863903085368	0.0	755	ZC3H12C	0.017482517482517484	755	ZC3H12C	0.01748251748251748	3.469446951953614E-18
756	GNG12	0.01567152483936687	756	GNG12	0.01567152483936687	0.0	756	SLC12A6	0.01722356183258698	756	SLC12A6	0.017223561832586977	3.469446951953614E-18	756	CCL20	0.015213753232922561	756	CCL20	0.015213753232922563	1.734723475976807E-18	756	SELP	0.01712035610340695	756	SELP	0.01712035610340695	0.0	756	C1QC	0.01892863903085368	756	C1QC	0.01892863903085368	0.0	756	ZC3H12D	0.017482517482517484	756	ZC3H12D	0.01748251748251748	3.469446951953614E-18
757	SYTL4	0.01567152483936687	757	SYTL4	0.01567152483936687	0.0	757	BEAN1	0.01722356183258698	757	BEAN1	0.017223561832586977	3.469446951953614E-18	757	GCSAML	0.015213753232922561	757	GCSAML	0.015213753232922563	1.734723475976807E-18	757	C5orf52	0.01712035610340695	757	C5orf52	0.01712035610340695	0.0	757	COL8A1	0.01892863903085368	757	COL8A1	0.01892863903085368	0.0	757	UBASH3B	0.017482517482517484	757	UBASH3B	0.01748251748251748	3.469446951953614E-18
758	FLVCR2	0.01567152483936687	758	FLVCR2	0.01567152483936687	0.0	758	RGS8	0.01722356183258698	758	RGS8	0.017223561832586977	3.469446951953614E-18	758	ST20	0.015213753232922561	758	ST20	0.015213753232922563	1.734723475976807E-18	758	WNT11	0.01712035610340695	758	WNT11	0.01712035610340695	0.0	758	CLDN16	0.01892863903085368	758	CLDN16	0.01892863903085368	0.0	758	CASP7	0.017482517482517484	758	CASP7	0.01748251748251748	3.469446951953614E-18
759	CDH5	0.01567152483936687	759	CDH5	0.01567152483936687	0.0	759	CD68	0.01722356183258698	759	CD68	0.017223561832586977	3.469446951953614E-18	759	SPESP1	0.015213753232922561	759	SPESP1	0.015213753232922563	1.734723475976807E-18	759	ZSWIM8	0.01712035610340695	759	ZSWIM8	0.01712035610340695	0.0	759	GLUL	0.01892863903085368	759	GLUL	0.01892863903085368	0.0	759	DYRK4	0.017482517482517484	759	DYRK4	0.01748251748251748	3.469446951953614E-18
760	LIPC	0.01567152483936687	760	LIPC	0.01567152483936687	0.0	760	GALR2	0.01722356183258698	760	GALR2	0.017223561832586977	3.469446951953614E-18	760	ZBTB20	0.015213753232922561	760	ZBTB20	0.015213753232922563	1.734723475976807E-18	760	PARP10	0.01712035610340695	760	PARP10	0.01712035610340695	0.0	760	PTGER2	0.01892863903085368	760	PTGER2	0.01892863903085368	0.0	760	KCNJ15	0.017482517482517484	760	KCNJ15	0.01748251748251748	3.469446951953614E-18
761	RAMP1	0.01567152483936687	761	RAMP1	0.01567152483936687	0.0	761	PLXNA2	0.01722356183258698	761	PLXNA2	0.017223561832586977	3.469446951953614E-18	761	ALPK1	0.015213753232922561	761	ALPK1	0.015213753232922563	1.734723475976807E-18	761	MYO3B	0.01712035610340695	761	MYO3B	0.01712035610340695	0.0	761	ASAH1	0.01892863903085368	761	ASAH1	0.01892863903085368	0.0	761	GLIPR1	0.017482517482517484	761	GLIPR1	0.01748251748251748	3.469446951953614E-18
762	TMEM229B	0.01567152483936687	762	TMEM229B	0.01567152483936687	0.0	762	C1orf162	0.01722356183258698	762	C1orf162	0.017223561832586977	3.469446951953614E-18	762	DOCK8	0.015213753232922561	762	DOCK8	0.015213753232922563	1.734723475976807E-18	762	TP53I13	0.01712035610340695	762	TP53I13	0.01712035610340695	0.0	762	HCAR3	0.01892863903085368	762	HCAR3	0.01892863903085368	0.0	762	HORMAD1	0.017482517482517484	762	HORMAD1	0.01748251748251748	3.469446951953614E-18
763	PDGFRL	0.01567152483936687	763	PDGFRL	0.01567152483936687	0.0	763	CREG1	0.01722356183258698	763	CREG1	0.017223561832586977	3.469446951953614E-18	763	KIFAP3	0.015213753232922561	763	KIFAP3	0.015213753232922563	1.734723475976807E-18	763	CCNG2	0.01712035610340695	763	CCNG2	0.01712035610340695	0.0	763	HCAR2	0.01892863903085368	763	HCAR2	0.01892863903085368	0.0	763	AICDA	0.017482517482517484	763	AICDA	0.01748251748251748	3.469446951953614E-18
764	SLC41A2	0.01567152483936687	764	SLC41A2	0.01567152483936687	0.0	764	S100Z	0.01722356183258698	764	S100Z	0.017223561832586977	3.469446951953614E-18	764	C2CD2L	0.015213753232922561	764	C2CD2L	0.015213753232922563	1.734723475976807E-18	764	NECAP2	0.01712035610340695	764	NECAP2	0.01712035610340695	0.0	764	HCAR1	0.01892863903085368	764	HCAR1	0.01892863903085368	0.0	764	PTPRM	0.017482517482517484	764	PTPRM	0.01748251748251748	3.469446951953614E-18
765	SCARB1	0.01567152483936687	765	SCARB1	0.01567152483936687	0.0	765	ZMYND15	0.01722356183258698	765	ZMYND15	0.017223561832586977	3.469446951953614E-18	765	ADORA3	0.015213753232922561	765	ADORA3	0.015213753232922563	1.734723475976807E-18	765	ARL11	0.01712035610340695	765	ARL11	0.01712035610340695	0.0	765	XAF1	0.01892863903085368	765	XAF1	0.01892863903085368	0.0	765	MYO7A	0.017482517482517484	765	MYO7A	0.01748251748251748	3.469446951953614E-18
766	CSF1	0.01567152483936687	766	CSF1	0.01567152483936687	0.0	766	HAVCR1	0.01722356183258698	766	HAVCR1	0.017223561832586977	3.469446951953614E-18	766	CC2D1B	0.015213753232922561	766	CC2D1B	0.015213753232922563	1.734723475976807E-18	766	DPYD	0.01712035610340695	766	DPYD	0.01712035610340695	0.0	766	HMOX2	0.01892863903085368	766	HMOX2	0.01892863903085368	0.0	766	PTPRH	0.017482517482517484	766	PTPRH	0.01748251748251748	3.469446951953614E-18
767	GPR68	0.01567152483936687	767	GPR68	0.01567152483936687	0.0	767	NEFH	0.01722356183258698	767	NEFH	0.017223561832586977	3.469446951953614E-18	767	FAM126B	0.015213753232922561	767	FAM126B	0.015213753232922563	1.734723475976807E-18	767	OPHN1	0.01712035610340695	767	OPHN1	0.01712035610340695	0.0	767	TLR1	0.01892863903085368	767	TLR1	0.01892863903085368	0.0	767	CPM	0.017482517482517484	767	CPM	0.01748251748251748	3.469446951953614E-18
768	SLC9B1	0.01567152483936687	768	SLC9B1	0.01567152483936687	0.0	768	AOAH	0.01722356183258698	768	AOAH	0.017223561832586977	3.469446951953614E-18	768	SLC9A7	0.015213753232922561	768	SLC9A7	0.015213753232922563	1.734723475976807E-18	768	CA13	0.01712035610340695	768	CA13	0.01712035610340695	0.0	768	NFATC2	0.01892863903085368	768	NFATC2	0.01892863903085368	0.0	768	IRAK3	0.017482517482517484	768	IRAK3	0.01748251748251748	3.469446951953614E-18
769	CD300LB	0.01567152483936687	769	CD300LB	0.01567152483936687	0.0	769	MBP	0.01722356183258698	769	MBP	0.017223561832586977	3.469446951953614E-18	769	TNRC18	0.015213753232922561	769	TNRC18	0.015213753232922563	1.734723475976807E-18	769	TPSAB1	0.01712035610340695	769	TPSAB1	0.01712035610340695	0.0	769	SLC6A19	0.01892863903085368	769	SLC6A19	0.01892863903085368	0.0	769	WIPI1	0.017482517482517484	769	WIPI1	0.01748251748251748	3.469446951953614E-18
770	HSPB7	0.01567152483936687	770	HSPB7	0.01567152483936687	0.0	770	GNLY	0.01722356183258698	770	GNLY	0.017223561832586977	3.469446951953614E-18	770	C16orf86	0.015213753232922561	770	C16orf86	0.015213753232922563	1.734723475976807E-18	770	ATP6V0E1	0.01712035610340695	770	ATP6V0E1	0.01712035610340695	0.0	770	REEP1	0.01892863903085368	770	REEP1	0.01892863903085368	0.0	770	F3	0.017482517482517484	770	F3	0.01748251748251748	3.469446951953614E-18
771	TREM2	0.01567152483936687	771	TREM2	0.01567152483936687	0.0	771	PGA3	0.01722356183258698	771	PGA3	0.017223561832586977	3.469446951953614E-18	771	PLEKHB2	0.015213753232922561	771	PLEKHB2	0.015213753232922563	1.734723475976807E-18	771	CFP	0.01712035610340695	771	CFP	0.01712035610340695	0.0	771	CLEC7A	0.01892863903085368	771	CLEC7A	0.01892863903085368	0.0	771	ABLIM3	0.017482517482517484	771	ABLIM3	0.01748251748251748	3.469446951953614E-18
772	ANXA2	0.01567152483936687	772	ANXA2	0.01567152483936687	0.0	772	HVCN1	0.01722356183258698	772	HVCN1	0.017223561832586977	3.469446951953614E-18	772	PARP9	0.015213753232922561	772	PARP9	0.015213753232922563	1.734723475976807E-18	772	TIGD5	0.01712035610340695	772	TIGD5	0.01712035610340695	0.0	772	SLC22A18AS	0.01892863903085368	772	SLC22A18AS	0.01892863903085368	0.0	772	TNFSF13	0.017482517482517484	772	TNFSF13	0.01748251748251748	3.469446951953614E-18
773	WNT3	0.01567152483936687	773	WNT3	0.01567152483936687	0.0	773	ZNF710	0.01722356183258698	773	ZNF710	0.017223561832586977	3.469446951953614E-18	773	CCR3	0.015213753232922561	773	CCR3	0.015213753232922563	1.734723475976807E-18	773	PROC	0.01712035610340695	773	PROC	0.01712035610340695	0.0	773	CHRNA6	0.01892863903085368	773	CHRNA6	0.01892863903085368	0.0	773	RASL10A	0.017482517482517484	773	RASL10A	0.01748251748251748	3.469446951953614E-18
774	LAYN	0.01567152483936687	774	LAYN	0.01567152483936687	0.0	774	TOM1L2	0.01722356183258698	774	TOM1L2	0.017223561832586977	3.469446951953614E-18	774	DDO	0.015213753232922561	774	DDO	0.015213753232922563	1.734723475976807E-18	774	CSF1R	0.01712035610340695	774	CSF1R	0.01712035610340695	0.0	774	ID2	0.01892863903085368	774	ID2	0.01892863903085368	0.0	774	TNFSF15	0.017482517482517484	774	TNFSF15	0.01748251748251748	3.469446951953614E-18
775	ANPEP	0.01567152483936687	775	ANPEP	0.01567152483936687	0.0	775	SLFN5	0.01722356183258698	775	SLFN5	0.017223561832586977	3.469446951953614E-18	775	IL13RA1	0.015213753232922561	775	IL13RA1	0.015213753232922563	1.734723475976807E-18	775	CCPG1	0.01712035610340695	775	CCPG1	0.01712035610340695	0.0	775	CD52	0.01892863903085368	775	CD52	0.01892863903085368	0.0	775	TNFSF18	0.017482517482517484	775	TNFSF18	0.01748251748251748	3.469446951953614E-18
776	VNN3	0.01567152483936687	776	VNN3	0.01567152483936687	0.0	776	TMOD4	0.01722356183258698	776	TMOD4	0.017223561832586977	3.469446951953614E-18	776	ANG	0.015213753232922561	776	ANG	0.015213753232922563	1.734723475976807E-18	776	PTCRA	0.01712035610340695	776	PTCRA	0.01712035610340695	0.0	776	CD58	0.01892863903085368	776	CD58	0.01892863903085368	0.0	776	GPR18	0.017482517482517484	776	GPR18	0.01748251748251748	3.469446951953614E-18
777	TIFA	0.01567152483936687	777	TIFA	0.01567152483936687	0.0	777	TMOD2	0.01722356183258698	777	TMOD2	0.017223561832586977	3.469446951953614E-18	777	CST6	0.015213753232922561	777	CST6	0.015213753232922563	1.734723475976807E-18	777	ARHGAP31	0.01712035610340695	777	ARHGAP31	0.01712035610340695	0.0	777	RAB32	0.01892863903085368	777	RAB32	0.01892863903085368	0.0	777	IFIT3	0.017482517482517484	777	IFIT3	0.01748251748251748	3.469446951953614E-18
778	SHE	0.01567152483936687	778	SHE	0.01567152483936687	0.0	778	MYOM1	0.01722356183258698	778	MYOM1	0.017223561832586977	3.469446951953614E-18	778	NHLRC4	0.015213753232922561	778	NHLRC4	0.015213753232922563	1.734723475976807E-18	778	CPPED1	0.01712035610340695	778	CPPED1	0.01712035610340695	0.0	778	C1QA	0.01892863903085368	778	C1QA	0.01892863903085368	0.0	778	IFIT2	0.017482517482517484	778	IFIT2	0.01748251748251748	3.469446951953614E-18
779	BLVRA	0.01567152483936687	779	BLVRA	0.01567152483936687	0.0	779	CASP10	0.01722356183258698	779	CASP10	0.017223561832586977	3.469446951953614E-18	779	TIE1	0.015213753232922561	779	TIE1	0.015213753232922563	1.734723475976807E-18	779	TRIM21	0.01712035610340695	779	TRIM21	0.01712035610340695	0.0	779	TTLL11	0.01892863903085368	779	TTLL11	0.01892863903085368	0.0	779	RWDD2B	0.017482517482517484	779	RWDD2B	0.01748251748251748	3.469446951953614E-18
780	PHEX	0.01567152483936687	780	PHEX	0.01567152483936687	0.0	780	AVIL	0.01722356183258698	780	AVIL	0.017223561832586977	3.469446951953614E-18	780	KLRF1	0.015213753232922561	780	KLRF1	0.015213753232922563	1.734723475976807E-18	780	TTC16	0.01712035610340695	780	TTC16	0.01712035610340695	0.0	780	RCSD1	0.01892863903085368	780	RCSD1	0.01892863903085368	0.0	780	CLEC4A	0.017482517482517484	780	CLEC4A	0.01748251748251748	3.469446951953614E-18
781	KLRG1	0.01567152483936687	781	KLRG1	0.01567152483936687	0.0	781	LIG4	0.01722356183258698	781	LIG4	0.017223561832586977	3.469446951953614E-18	781	SLC10A3	0.015213753232922561	781	SLC10A3	0.015213753232922563	1.734723475976807E-18	781	PNRC1	0.01712035610340695	781	PNRC1	0.01712035610340695	0.0	781	AP5Z1	0.01892863903085368	781	AP5Z1	0.01892863903085368	0.0	781	APOA4	0.017482517482517484	781	APOA4	0.01748251748251748	3.469446951953614E-18
782	GLTPD2	0.01567152483936687	782	GLTPD2	0.01567152483936687	0.0	782	STK17A	0.01722356183258698	782	STK17A	0.017223561832586977	3.469446951953614E-18	782	SLC10A1	0.015213753232922561	782	SLC10A1	0.015213753232922563	1.734723475976807E-18	782	NDRG1	0.01712035610340695	782	NDRG1	0.01712035610340695	0.0	782	RHOB	0.01892863903085368	782	RHOB	0.01892863903085368	0.0	782	CASP5	0.017482517482517484	782	CASP5	0.01748251748251748	3.469446951953614E-18
783	PLA2G15	0.01567152483936687	783	PLA2G15	0.01567152483936687	0.0	783	EHBP1L1	0.01722356183258698	783	EHBP1L1	0.017223561832586977	3.469446951953614E-18	783	TMEM38B	0.015213753232922561	783	TMEM38B	0.015213753232922563	1.734723475976807E-18	783	PPM1N	0.01712035610340695	783	PPM1N	0.01712035610340695	0.0	783	LRG1	0.01892863903085368	783	LRG1	0.01892863903085368	0.0	783	SERPINC1	0.017482517482517484	783	SERPINC1	0.01748251748251748	3.469446951953614E-18
784	ALDH1A2	0.01567152483936687	784	ALDH1A2	0.01567152483936687	0.0	784	CCDC62	0.01722356183258698	784	CCDC62	0.017223561832586977	3.469446951953614E-18	784	CEACAM21	0.015213753232922561	784	CEACAM21	0.015213753232922563	1.734723475976807E-18	784	CDK2AP2	0.01712035610340695	784	CDK2AP2	0.01712035610340695	0.0	784	SELL	0.01892863903085368	784	SELL	0.01892863903085368	0.0	784	PDE6H	0.017482517482517484	784	PDE6H	0.01748251748251748	3.469446951953614E-18
785	SH3TC2	0.01567152483936687	785	SH3TC2	0.01567152483936687	0.0	785	CACNA2D4	0.01722356183258698	785	CACNA2D4	0.017223561832586977	3.469446951953614E-18	785	PUS10	0.015213753232922561	785	PUS10	0.015213753232922563	1.734723475976807E-18	785	C15orf39	0.01712035610340695	785	C15orf39	0.01712035610340695	0.0	785	SELP	0.01892863903085368	785	SELP	0.01892863903085368	0.0	785	TRIM55	0.017482517482517484	785	TRIM55	0.01748251748251748	3.469446951953614E-18
786	ANXA1	0.01567152483936687	786	ANXA1	0.01567152483936687	0.0	786	HAL	0.01722356183258698	786	HAL	0.017223561832586977	3.469446951953614E-18	786	AGRP	0.015213753232922561	786	AGRP	0.015213753232922563	1.734723475976807E-18	786	ADPRH	0.01712035610340695	786	ADPRH	0.01712035610340695	0.0	786	WNT11	0.01892863903085368	786	WNT11	0.01892863903085368	0.0	786	RNASET2	0.017482517482517484	786	RNASET2	0.01748251748251748	3.469446951953614E-18
787	TMEM138	0.01567152483936687	787	TMEM138	0.01567152483936687	0.0	787	KCTD18	0.01722356183258698	787	KCTD18	0.017223561832586977	3.469446951953614E-18	787	PDGFRA	0.015213753232922561	787	PDGFRA	0.015213753232922563	1.734723475976807E-18	787	C5	0.01712035610340695	787	C5	0.01712035610340695	0.0	787	ZSWIM8	0.01892863903085368	787	ZSWIM8	0.01892863903085368	0.0	787	SMARCA2	0.017482517482517484	787	SMARCA2	0.01748251748251748	3.469446951953614E-18
788	FOXE1	0.01567152483936687	788	FOXE1	0.01567152483936687	0.0	788	EPSTI1	0.01722356183258698	788	EPSTI1	0.017223561832586977	3.469446951953614E-18	788	RARRES1	0.015213753232922561	788	RARRES1	0.015213753232922563	1.734723475976807E-18	788	LGALS9	0.01712035610340695	788	LGALS9	0.01712035610340695	0.0	788	C11orf52	0.01892863903085368	788	C11orf52	0.01892863903085368	0.0	788	TFPI	0.017482517482517484	788	TFPI	0.01748251748251748	3.469446951953614E-18
789	TREM1	0.01567152483936687	789	TREM1	0.01567152483936687	0.0	789	BATF	0.01722356183258698	789	BATF	0.017223561832586977	3.469446951953614E-18	789	IL1RAPL1	0.015213753232922561	789	IL1RAPL1	0.015213753232922563	1.734723475976807E-18	789	IDO2	0.01712035610340695	789	IDO2	0.01712035610340695	0.0	789	PARP10	0.01892863903085368	789	PARP10	0.01892863903085368	0.0	789	SRPX2	0.017482517482517484	789	SRPX2	0.01748251748251748	3.469446951953614E-18
790	GMNC	0.01567152483936687	790	GMNC	0.01567152483936687	0.0	790	C1QC	0.01722356183258698	790	C1QC	0.017223561832586977	3.469446951953614E-18	790	CORO1A	0.015213753232922561	790	CORO1A	0.015213753232922563	1.734723475976807E-18	790	CD28	0.01712035610340695	790	CD28	0.01712035610340695	0.0	790	MYO3B	0.01892863903085368	790	MYO3B	0.01892863903085368	0.0	790	SLC25A45	0.017482517482517484	790	SLC25A45	0.01748251748251748	3.469446951953614E-18
791	LUM	0.01567152483936687	791	LUM	0.01567152483936687	0.0	791	C1QB	0.01722356183258698	791	C1QB	0.017223561832586977	3.469446951953614E-18	791	FAS	0.015213753232922561	791	FAS	0.015213753232922563	1.734723475976807E-18	791	CALHM2	0.01712035610340695	791	CALHM2	0.01712035610340695	0.0	791	GRP	0.01892863903085368	791	GRP	0.01892863903085368	0.0	791	FAIM2	0.017482517482517484	791	FAIM2	0.01748251748251748	3.469446951953614E-18
792	GAS2L1	0.01567152483936687	792	GAS2L1	0.01567152483936687	0.0	792	TRIM63	0.01722356183258698	792	TRIM63	0.017223561832586977	3.469446951953614E-18	792	MLLT6	0.015213753232922561	792	MLLT6	0.015213753232922563	1.734723475976807E-18	792	PIGZ	0.01712035610340695	792	PIGZ	0.01712035610340695	0.0	792	DNASE1L3	0.01892863903085368	792	DNASE1L3	0.01892863903085368	0.0	792	HGF	0.017482517482517484	792	HGF	0.01748251748251748	3.469446951953614E-18
793	ZNF438	0.01567152483936687	793	ZNF438	0.01567152483936687	0.0	793	PREX1	0.01722356183258698	793	PREX1	0.017223561832586977	3.469446951953614E-18	793	AP4E1	0.015213753232922561	793	AP4E1	0.015213753232922563	1.734723475976807E-18	793	C19orf38	0.01712035610340695	793	C19orf38	0.01712035610340695	0.0	793	PRNP	0.01892863903085368	793	PRNP	0.01892863903085368	0.0	793	GPR150	0.017482517482517484	793	GPR150	0.01748251748251748	3.469446951953614E-18
794	FGD2	0.01567152483936687	794	FGD2	0.01567152483936687	0.0	794	PTGER2	0.01722356183258698	794	PTGER2	0.017223561832586977	3.469446951953614E-18	794	TMBIM4	0.015213753232922561	794	TMBIM4	0.015213753232922563	1.734723475976807E-18	794	DLEC1	0.01712035610340695	794	DLEC1	0.01712035610340695	0.0	794	CCNG2	0.01892863903085368	794	CCNG2	0.01892863903085368	0.0	794	ABCA6	0.017482517482517484	794	ABCA6	0.01748251748251748	3.469446951953614E-18
795	CELF2	0.01567152483936687	795	CELF2	0.01567152483936687	0.0	795	PIK3R6	0.01722356183258698	795	PIK3R6	0.017223561832586977	3.469446951953614E-18	795	IL15RA	0.015213753232922561	795	IL15RA	0.015213753232922563	1.734723475976807E-18	795	PDK4	0.01712035610340695	795	PDK4	0.01712035610340695	0.0	795	ARL11	0.01892863903085368	795	ARL11	0.01892863903085368	0.0	795	ABCA1	0.017482517482517484	795	ABCA1	0.01748251748251748	3.469446951953614E-18
796	AGAP2	0.01567152483936687	796	AGAP2	0.01567152483936687	0.0	796	OS9	0.01722356183258698	796	OS9	0.017223561832586977	3.469446951953614E-18	796	CASP8	0.015213753232922561	796	CASP8	0.015213753232922563	1.734723475976807E-18	796	ARHGAP22	0.01712035610340695	796	ARHGAP22	0.01712035610340695	0.0	796	DPYD	0.01892863903085368	796	DPYD	0.01892863903085368	0.0	796	FAM89B	0.017482517482517484	796	FAM89B	0.01748251748251748	3.469446951953614E-18
797	TM6SF1	0.01567152483936687	797	TM6SF1	0.01567152483936687	0.0	797	FAM177B	0.01722356183258698	797	FAM177B	0.017223561832586977	3.469446951953614E-18	797	PURA	0.015213753232922561	797	PURA	0.015213753232922563	1.734723475976807E-18	797	CREBRF	0.01712035610340695	797	CREBRF	0.01712035610340695	0.0	797	OPHN1	0.01892863903085368	797	OPHN1	0.01892863903085368	0.0	797	ABCA8	0.017482517482517484	797	ABCA8	0.01748251748251748	3.469446951953614E-18
798	FBXW5	0.01567152483936687	798	FBXW5	0.01567152483936687	0.0	798	ASAH1	0.01722356183258698	798	ASAH1	0.017223561832586977	3.469446951953614E-18	798	BCL6	0.015213753232922561	798	BCL6	0.015213753232922563	1.734723475976807E-18	798	TDRD9	0.01712035610340695	798	TDRD9	0.01712035610340695	0.0	798	ATP6V0E1	0.01892863903085368	798	ATP6V0E1	0.01892863903085368	0.0	798	TMEM151A	0.017482517482517484	798	TMEM151A	0.01748251748251748	3.469446951953614E-18
799	CCRL2	0.01567152483936687	799	CCRL2	0.01567152483936687	0.0	799	HCAR3	0.01722356183258698	799	HCAR3	0.017223561832586977	3.469446951953614E-18	799	BCL2	0.015213753232922561	799	BCL2	0.015213753232922563	1.734723475976807E-18	799	ADAM9	0.01712035610340695	799	ADAM9	0.01712035610340695	0.0	799	CFP	0.01892863903085368	799	CFP	0.01892863903085368	0.0	799	MITF	0.017482517482517484	799	MITF	0.01748251748251748	3.469446951953614E-18
800	SLC23A2	0.01567152483936687	800	SLC23A2	0.01567152483936687	0.0	800	HCAR2	0.01722356183258698	800	HCAR2	0.017223561832586977	3.469446951953614E-18	800	MAN2B2	0.015213753232922561	800	MAN2B2	0.015213753232922563	1.734723475976807E-18	800	TRIM38	0.01712035610340695	800	TRIM38	0.01712035610340695	0.0	800	PTHLH	0.01892863903085368	800	PTHLH	0.01892863903085368	0.0	800	RTP4	0.017482517482517484	800	RTP4	0.01748251748251748	3.469446951953614E-18
801	SLAMF7	0.01567152483936687	801	SLAMF7	0.01567152483936687	0.0	801	XAF1	0.01722356183258698	801	XAF1	0.017223561832586977	3.469446951953614E-18	801	DUOXA1	0.015213753232922561	801	DUOXA1	0.015213753232922563	1.734723475976807E-18	801	RASSF2	0.01712035610340695	801	RASSF2	0.01712035610340695	0.0	801	ASB4	0.01892863903085368	801	ASB4	0.01892863903085368	0.0	801	AQP2	0.017482517482517484	801	AQP2	0.01748251748251748	3.469446951953614E-18
802	SLAMF6	0.01567152483936687	802	SLAMF6	0.01567152483936687	0.0	802	TLR1	0.01722356183258698	802	TLR1	0.017223561832586977	3.469446951953614E-18	802	PLK3	0.015213753232922561	802	PLK3	0.015213753232922563	1.734723475976807E-18	802	IL1R1	0.01712035610340695	802	IL1R1	0.01712035610340695	0.0	802	ASB5	0.01892863903085368	802	ASB5	0.01892863903085368	0.0	802	MYOF	0.017482517482517484	802	MYOF	0.01748251748251748	3.469446951953614E-18
803	TGFB2	0.01567152483936687	803	TGFB2	0.01567152483936687	0.0	803	NFATC2	0.01722356183258698	803	NFATC2	0.017223561832586977	3.469446951953614E-18	803	PKD1L1	0.015213753232922561	803	PKD1L1	0.015213753232922563	1.734723475976807E-18	803	CHD3	0.01712035610340695	803	CHD3	0.01712035610340695	0.0	803	LRFN2	0.01892863903085368	803	LRFN2	0.01892863903085368	0.0	803	MAB21L1	0.017482517482517484	803	MAB21L1	0.01748251748251748	3.469446951953614E-18
804	TGFB3	0.01567152483936687	804	TGFB3	0.01567152483936687	0.0	804	SOS2	0.01722356183258698	804	SOS2	0.017223561832586977	3.469446951953614E-18	804	CCL5	0.015213753232922561	804	CCL5	0.015213753232922563	1.734723475976807E-18	804	ABHD15	0.01712035610340695	804	ABHD15	0.01712035610340695	0.0	804	PROC	0.01892863903085368	804	PROC	0.01892863903085368	0.0	804	PARM1	0.017482517482517484	804	PARM1	0.01748251748251748	3.469446951953614E-18
805	TGFBR2	0.01567152483936687	805	TGFBR2	0.01567152483936687	0.0	805	TICAM1	0.01722356183258698	805	TICAM1	0.017223561832586977	3.469446951953614E-18	805	PDE7B	0.015213753232922561	805	PDE7B	0.015213753232922563	1.734723475976807E-18	805	CD302	0.01712035610340695	805	CD302	0.01712035610340695	0.0	805	CSF1R	0.01892863903085368	805	CSF1R	0.01892863903085368	0.0	805	APOL4	0.017482517482517484	805	APOL4	0.01748251748251748	3.469446951953614E-18
806	SH3RF2	0.01567152483936687	806	SH3RF2	0.01567152483936687	0.0	806	TMED5	0.01722356183258698	806	TMED5	0.017223561832586977	3.469446951953614E-18	806	GP6	0.015213753232922561	806	GP6	0.015213753232922563	1.734723475976807E-18	806	C15orf48	0.01712035610340695	806	C15orf48	0.01712035610340695	0.0	806	CCPG1	0.01892863903085368	806	CCPG1	0.01892863903085368	0.0	806	APOL1	0.017482517482517484	806	APOL1	0.01748251748251748	3.469446951953614E-18
807	SLC47A2	0.01567152483936687	807	SLC47A2	0.01567152483936687	0.0	807	SMIM6	0.01722356183258698	807	SMIM6	0.017223561832586977	3.469446951953614E-18	807	KLHL5	0.015213753232922561	807	KLHL5	0.015213753232922563	1.734723475976807E-18	807	ACOT11	0.01712035610340695	807	ACOT11	0.01712035610340695	0.0	807	UPP1	0.01892863903085368	807	UPP1	0.01892863903085368	0.0	807	ITGB3	0.017482517482517484	807	ITGB3	0.01748251748251748	3.469446951953614E-18
808	KRTAP2-3	0.01567152483936687	808	KRTAP2-3	0.01567152483936687	0.0	808	SMIM5	0.01722356183258698	808	SMIM5	0.017223561832586977	3.469446951953614E-18	808	SERPINB1	0.015213753232922561	808	SERPINB1	0.015213753232922563	1.734723475976807E-18	808	SH3KBP1	0.01712035610340695	808	SH3KBP1	0.01712035610340695	0.0	808	PTCRA	0.01892863903085368	808	PTCRA	0.01892863903085368	0.0	808	ITGB7	0.017482517482517484	808	ITGB7	0.01748251748251748	3.469446951953614E-18
809	AP1B1	0.01567152483936687	809	AP1B1	0.01567152483936687	0.0	809	PCED1B	0.01722356183258698	809	PCED1B	0.017223561832586977	3.469446951953614E-18	809	SERPINB2	0.015213753232922561	809	SERPINB2	0.015213753232922563	1.734723475976807E-18	809	SIGLEC10	0.01712035610340695	809	SIGLEC10	0.01712035610340695	0.0	809	SOWAHB	0.01892863903085368	809	SOWAHB	0.01892863903085368	0.0	809	ABR	0.017482517482517484	809	ABR	0.01748251748251748	3.469446951953614E-18
810	MAP3K7CL	0.01567152483936687	810	MAP3K7CL	0.01567152483936687	0.0	810	ALG2	0.01722356183258698	810	ALG2	0.017223561832586977	3.469446951953614E-18	810	SERPINB6	0.015213753232922561	810	SERPINB6	0.015213753232922563	1.734723475976807E-18	810	C5orf64	0.01712035610340695	810	C5orf64	0.01712035610340695	0.0	810	ARHGAP31	0.01892863903085368	810	ARHGAP31	0.01892863903085368	0.0	810	LCP1	0.017482517482517484	810	LCP1	0.01748251748251748	3.469446951953614E-18
811	TET2	0.01567152483936687	811	TET2	0.01567152483936687	0.0	811	REEP1	0.01722356183258698	811	REEP1	0.017223561832586977	3.469446951953614E-18	811	PCGF1	0.015213753232922561	811	PCGF1	0.015213753232922563	1.734723475976807E-18	811	COMMD3	0.01712035610340695	811	COMMD3	0.01712035610340695	0.0	811	CD38	0.01892863903085368	811	CD38	0.01892863903085368	0.0	811	TTYH2	0.017482517482517484	811	TTYH2	0.01748251748251748	3.469446951953614E-18
812	CCDC80	0.01567152483936687	812	CCDC80	0.01567152483936687	0.0	812	CYB561A3	0.01722356183258698	812	CYB561A3	0.017223561832586977	3.469446951953614E-18	812	FCRL4	0.015213753232922561	812	FCRL4	0.015213753232922563	1.734723475976807E-18	812	MTFMT	0.01712035610340695	812	MTFMT	0.01712035610340695	0.0	812	CPPED1	0.01892863903085368	812	CPPED1	0.01892863903085368	0.0	812	TBXAS1	0.017482517482517484	812	TBXAS1	0.01748251748251748	3.469446951953614E-18
813	GLRB	0.01567152483936687	813	GLRB	0.01567152483936687	0.0	813	CLEC7A	0.01722356183258698	813	CLEC7A	0.017223561832586977	3.469446951953614E-18	813	NEDD9	0.015213753232922561	813	NEDD9	0.015213753232922563	1.734723475976807E-18	813	CSF3R	0.01712035610340695	813	CSF3R	0.01712035610340695	0.0	813	TRIM21	0.01892863903085368	813	TRIM21	0.01892863903085368	0.0	813	CMTM3	0.017482517482517484	813	CMTM3	0.01748251748251748	3.469446951953614E-18
814	CIITA	0.01567152483936687	814	CIITA	0.01567152483936687	0.0	814	METRNL	0.01722356183258698	814	METRNL	0.017223561832586977	3.469446951953614E-18	814	CLEC12B	0.015213753232922561	814	CLEC12B	0.015213753232922563	1.734723475976807E-18	814	STARD8	0.01712035610340695	814	STARD8	0.01712035610340695	0.0	814	PNKD	0.01892863903085368	814	PNKD	0.01892863903085368	0.0	814	MPC2	0.017482517482517484	814	MPC2	0.01748251748251748	3.469446951953614E-18
815	MGAT1	0.01567152483936687	815	MGAT1	0.01567152483936687	0.0	815	SLC22A18AS	0.01722356183258698	815	SLC22A18AS	0.017223561832586977	3.469446951953614E-18	815	ANKRD55	0.015213753232922561	815	ANKRD55	0.015213753232922563	1.734723475976807E-18	815	RAB27A	0.01712035610340695	815	RAB27A	0.01712035610340695	0.0	815	PNRC1	0.01892863903085368	815	PNRC1	0.01892863903085368	0.0	815	MPC1	0.017482517482517484	815	MPC1	0.01748251748251748	3.469446951953614E-18
816	MGAT2	0.01567152483936687	816	MGAT2	0.01567152483936687	0.0	816	CHRNA6	0.01722356183258698	816	CHRNA6	0.017223561832586977	3.469446951953614E-18	816	AFAP1L1	0.015213753232922561	816	AFAP1L1	0.015213753232922563	1.734723475976807E-18	816	NKG7	0.01712035610340695	816	NKG7	0.01712035610340695	0.0	816	NDRG1	0.01892863903085368	816	NDRG1	0.01892863903085368	0.0	816	SLC25A19	0.017482517482517484	816	SLC25A19	0.01748251748251748	3.469446951953614E-18
817	IER5L	0.01567152483936687	817	IER5L	0.01567152483936687	0.0	817	RGS16	0.01722356183258698	817	RGS16	0.017223561832586977	3.469446951953614E-18	817	SPRYD3	0.015213753232922561	817	SPRYD3	0.015213753232922563	1.734723475976807E-18	817	WDFY4	0.01712035610340695	817	WDFY4	0.01712035610340695	0.0	817	PTPN3	0.01892863903085368	817	PTPN3	0.01892863903085368	0.0	817	RASAL3	0.017482517482517484	817	RASAL3	0.01748251748251748	3.469446951953614E-18
818	GLRX	0.01567152483936687	818	GLRX	0.01567152483936687	0.0	818	RGS12	0.01722356183258698	818	RGS12	0.017223561832586977	3.469446951953614E-18	818	ST18	0.015213753232922561	818	ST18	0.015213753232922563	1.734723475976807E-18	818	IL1RN	0.01712035610340695	818	IL1RN	0.01712035610340695	0.0	818	PPP1R17	0.01892863903085368	818	PPP1R17	0.01892863903085368	0.0	818	CCDC42	0.017482517482517484	818	CCDC42	0.01748251748251748	3.469446951953614E-18
819	PXMP2	0.01567152483936687	819	PXMP2	0.01567152483936687	0.0	819	RGS13	0.01722356183258698	819	RGS13	0.017223561832586977	3.469446951953614E-18	819	KLHDC1	0.015213753232922561	819	KLHDC1	0.015213753232922563	1.734723475976807E-18	819	TAGLN2	0.01712035610340695	819	TAGLN2	0.01712035610340695	0.0	819	C15orf39	0.01892863903085368	819	C15orf39	0.01892863903085368	0.0	819	CLEC5A	0.017482517482517484	819	CLEC5A	0.01748251748251748	3.469446951953614E-18
820	VAMP3	0.01567152483936687	820	VAMP3	0.01567152483936687	0.0	820	RGS10	0.01722356183258698	820	RGS10	0.017223561832586977	3.469446951953614E-18	820	ARRDC5	0.015213753232922561	820	ARRDC5	0.015213753232922563	1.734723475976807E-18	820	SCARF1	0.01712035610340695	820	SCARF1	0.01712035610340695	0.0	820	LGALS9	0.01892863903085368	820	LGALS9	0.01892863903085368	0.0	820	FGR	0.017482517482517484	820	FGR	0.01748251748251748	3.469446951953614E-18
821	VAMP5	0.01567152483936687	821	VAMP5	0.01567152483936687	0.0	821	TLR5	0.01722356183258698	821	TLR5	0.017223561832586977	3.469446951953614E-18	821	LANCL3	0.015213753232922561	821	LANCL3	0.015213753232922563	1.734723475976807E-18	821	APOBEC3G	0.01712035610340695	821	APOBEC3G	0.01712035610340695	0.0	821	IGSF21	0.01892863903085368	821	IGSF21	0.01892863903085368	0.0	821	CYP27A1	0.017482517482517484	821	CYP27A1	0.01748251748251748	3.469446951953614E-18
822	EBF2	0.01567152483936687	822	EBF2	0.01567152483936687	0.0	822	ID2	0.01722356183258698	822	ID2	0.017223561832586977	3.469446951953614E-18	822	ZZEF1	0.015213753232922561	822	ZZEF1	0.015213753232922563	1.734723475976807E-18	822	EBI3	0.01712035610340695	822	EBI3	0.01712035610340695	0.0	822	PIGZ	0.01892863903085368	822	PIGZ	0.01892863903085368	0.0	822	PLD1	0.017482517482517484	822	PLD1	0.01748251748251748	3.469446951953614E-18
823	COL15A1	0.01567152483936687	823	COL15A1	0.01567152483936687	0.0	823	CD52	0.01722356183258698	823	CD52	0.017223561832586977	3.469446951953614E-18	823	TNFSF13B	0.015213753232922561	823	TNFSF13B	0.015213753232922563	1.734723475976807E-18	823	MLKL	0.01712035610340695	823	MLKL	0.01712035610340695	0.0	823	C19orf38	0.01892863903085368	823	C19orf38	0.01892863903085368	0.0	823	CLECL1	0.017482517482517484	823	CLECL1	0.01748251748251748	3.469446951953614E-18
824	VAMP8	0.01567152483936687	824	VAMP8	0.01567152483936687	0.0	824	CD58	0.01722356183258698	824	CD58	0.017223561832586977	3.469446951953614E-18	824	SPATA13	0.015213753232922561	824	SPATA13	0.015213753232922563	1.734723475976807E-18	824	SH2D3C	0.01712035610340695	824	SH2D3C	0.01712035610340695	0.0	824	DLEC1	0.01892863903085368	824	DLEC1	0.01892863903085368	0.0	824	PXDC1	0.017482517482517484	824	PXDC1	0.01748251748251748	3.469446951953614E-18
825	MMP7	0.01567152483936687	825	MMP7	0.01567152483936687	0.0	825	RAB32	0.01722356183258698	825	RAB32	0.017223561832586977	3.469446951953614E-18	825	SIRT2	0.015213753232922561	825	SIRT2	0.015213753232922563	1.734723475976807E-18	825	GRIN3A	0.01712035610340695	825	GRIN3A	0.01712035610340695	0.0	825	PDK4	0.01892863903085368	825	PDK4	0.01892863903085368	0.0	825	GNG5	0.017482517482517484	825	GNG5	0.01748251748251748	3.469446951953614E-18
826	LY86	0.01567152483936687	826	LY86	0.01567152483936687	0.0	826	C1QA	0.01722356183258698	826	C1QA	0.017223561832586977	3.469446951953614E-18	826	KLHL30	0.015213753232922561	826	KLHL30	0.015213753232922563	1.734723475976807E-18	826	FPR1	0.01712035610340695	826	FPR1	0.01712035610340695	0.0	826	TDRD9	0.01892863903085368	826	TDRD9	0.01892863903085368	0.0	826	WFS1	0.017482517482517484	826	WFS1	0.01748251748251748	3.469446951953614E-18
827	MMP2	0.01567152483936687	827	MMP2	0.01567152483936687	0.0	827	TTLL11	0.01722356183258698	827	TTLL11	0.017223561832586977	3.469446951953614E-18	827	NCF2	0.015213753232922561	827	NCF2	0.015213753232922563	1.734723475976807E-18	827	C3AR1	0.01712035610340695	827	C3AR1	0.01712035610340695	0.0	827	RBP1	0.01892863903085368	827	RBP1	0.01892863903085368	0.0	827	ELMO1	0.017482517482517484	827	ELMO1	0.01748251748251748	3.469446951953614E-18
828	FCHO2	0.01567152483936687	828	FCHO2	0.01567152483936687	0.0	828	RCSD1	0.01722356183258698	828	RCSD1	0.017223561832586977	3.469446951953614E-18	828	ERMN	0.015213753232922561	828	ERMN	0.015213753232922563	1.734723475976807E-18	828	RGCC	0.01712035610340695	828	RGCC	0.01712035610340695	0.0	828	ADAM9	0.01892863903085368	828	ADAM9	0.01892863903085368	0.0	828	SNX3	0.017482517482517484	828	SNX3	0.01748251748251748	3.469446951953614E-18
829	CTSS	0.01567152483936687	829	CTSS	0.01567152483936687	0.0	829	LRG1	0.01722356183258698	829	LRG1	0.017223561832586977	3.469446951953614E-18	829	TLR10	0.015213753232922561	829	TLR10	0.015213753232922563	1.734723475976807E-18	829	APBB1IP	0.01712035610340695	829	APBB1IP	0.01712035610340695	0.0	829	TRIM38	0.01892863903085368	829	TRIM38	0.01892863903085368	0.0	829	CYB5R4	0.017482517482517484	829	CYB5R4	0.01748251748251748	3.469446951953614E-18
830	IL24	0.01567152483936687	830	IL24	0.01567152483936687	0.0	830	TPRG1	0.01722356183258698	830	TPRG1	0.017223561832586977	3.469446951953614E-18	830	TBC1D9	0.015213753232922561	830	TBC1D9	0.015213753232922563	1.734723475976807E-18	830	PCYT1A	0.01712035610340695	830	PCYT1A	0.01712035610340695	0.0	830	RASSF2	0.01892863903085368	830	RASSF2	0.01892863903085368	0.0	830	SNX9	0.017482517482517484	830	SNX9	0.01748251748251748	3.469446951953614E-18
831	NAALADL2	0.01567152483936687	831	NAALADL2	0.01567152483936687	0.0	831	SELL	0.01722356183258698	831	SELL	0.017223561832586977	3.469446951953614E-18	831	GPR146	0.015213753232922561	831	GPR146	0.015213753232922563	1.734723475976807E-18	831	CDKN2D	0.01712035610340695	831	CDKN2D	0.01712035610340695	0.0	831	RASSF6	0.01892863903085368	831	RASSF6	0.01892863903085368	0.0	831	SECTM1	0.017482517482517484	831	SECTM1	0.01748251748251748	3.469446951953614E-18
832	CTNNA2	0.01567152483936687	832	CTNNA2	0.01567152483936687	0.0	832	NFIX	0.01722356183258698	832	NFIX	0.017223561832586977	3.469446951953614E-18	832	TBC1D2	0.015213753232922561	832	TBC1D2	0.015213753232922563	1.734723475976807E-18	832	SLC2A5	0.01712035610340695	832	SLC2A5	0.01712035610340695	0.0	832	IL1R1	0.01892863903085368	832	IL1R1	0.01892863903085368	0.0	832	YPEL2	0.017482517482517484	832	YPEL2	0.01748251748251748	3.469446951953614E-18
833	SFRP4	0.01567152483936687	833	SFRP4	0.01567152483936687	0.0	833	WNT11	0.01722356183258698	833	WNT11	0.017223561832586977	3.469446951953614E-18	833	CDK15	0.015213753232922561	833	CDK15	0.015213753232922563	1.734723475976807E-18	833	TACSTD2	0.01712035610340695	833	TACSTD2	0.01712035610340695	0.0	833	ABHD15	0.01892863903085368	833	ABHD15	0.01892863903085368	0.0	833	ITPKB	0.017482517482517484	833	ITPKB	0.01748251748251748	3.469446951953614E-18
834	ATP6AP1	0.01567152483936687	834	ATP6AP1	0.01567152483936687	0.0	834	AGA	0.01722356183258698	834	AGA	0.017223561832586977	3.469446951953614E-18	834	SUCNR1	0.015213753232922561	834	SUCNR1	0.015213753232922563	1.734723475976807E-18	834	SLC46A1	0.01712035610340695	834	SLC46A1	0.01712035610340695	0.0	834	PLSCR1	0.01892863903085368	834	PLSCR1	0.01892863903085368	0.0	834	CD200R1	0.017482517482517484	834	CD200R1	0.01748251748251748	3.469446951953614E-18
835	ATP6AP2	0.01567152483936687	835	ATP6AP2	0.01567152483936687	0.0	835	PARP10	0.01722356183258698	835	PARP10	0.017223561832586977	3.469446951953614E-18	835	FGF14	0.015213753232922561	835	FGF14	0.015213753232922563	1.734723475976807E-18	835	ENG	0.01712035610340695	835	ENG	0.01712035610340695	0.0	835	CD302	0.01892863903085368	835	CD302	0.01892863903085368	0.0	835	CLDN1	0.017482517482517484	835	CLDN1	0.01748251748251748	3.469446951953614E-18
836	WLS	0.01567152483936687	836	WLS	0.01567152483936687	0.0	836	MYO3B	0.01722356183258698	836	MYO3B	0.017223561832586977	3.469446951953614E-18	836	KRT23	0.015213753232922561	836	KRT23	0.015213753232922563	1.734723475976807E-18	836	TOR2A	0.01712035610340695	836	TOR2A	0.01712035610340695	0.0	836	HP	0.01892863903085368	836	HP	0.01892863903085368	0.0	836	PLXDC2	0.017482517482517484	836	PLXDC2	0.01748251748251748	3.469446951953614E-18
837	ANKRD44	0.01567152483936687	837	ANKRD44	0.01567152483936687	0.0	837	PRNP	0.01722356183258698	837	PRNP	0.017223561832586977	3.469446951953614E-18	837	MTHFR	0.015213753232922561	837	MTHFR	0.015213753232922563	1.734723475976807E-18	837	PLB1	0.01712035610340695	837	PLB1	0.01712035610340695	0.0	837	C15orf48	0.01892863903085368	837	C15orf48	0.01892863903085368	0.0	837	ORAI2	0.017482517482517484	837	ORAI2	0.01748251748251748	3.469446951953614E-18
838	AK8	0.01567152483936687	838	AK8	0.01567152483936687	0.0	838	CCNG2	0.01722356183258698	838	CCNG2	0.017223561832586977	3.469446951953614E-18	838	COL9A2	0.015213753232922561	838	COL9A2	0.015213753232922563	1.734723475976807E-18	838	S1PR2	0.01712035610340695	838	S1PR2	0.01712035610340695	0.0	838	STAMBPL1	0.01892863903085368	838	STAMBPL1	0.01892863903085368	0.0	838	ORAI1	0.017482517482517484	838	ORAI1	0.01748251748251748	3.469446951953614E-18
839	CRYL1	0.01567152483936687	839	CRYL1	0.01567152483936687	0.0	839	NECAP2	0.01722356183258698	839	NECAP2	0.017223561832586977	3.469446951953614E-18	839	UNC13D	0.015213753232922561	839	UNC13D	0.015213753232922563	1.734723475976807E-18	839	SGSH	0.01712035610340695	839	SGSH	0.01712035610340695	0.0	839	RAPSN	0.01892863903085368	839	RAPSN	0.01892863903085368	0.0	839	DEFA4	0.017482517482517484	839	DEFA4	0.01748251748251748	3.469446951953614E-18
840	JAK1	0.01567152483936687	840	JAK1	0.01567152483936687	0.0	840	ARL11	0.01722356183258698	840	ARL11	0.017223561832586977	3.469446951953614E-18	840	VCAM1	0.015213753232922561	840	VCAM1	0.015213753232922563	1.734723475976807E-18	840	IL1B	0.01712035610340695	840	IL1B	0.01712035610340695	0.0	840	ACOT11	0.01892863903085368	840	ACOT11	0.01892863903085368	0.0	840	GALNT5	0.017482517482517484	840	GALNT5	0.01748251748251748	3.469446951953614E-18
841	AQP9	0.01567152483936687	841	AQP9	0.01567152483936687	0.0	841	DPYD	0.01722356183258698	841	DPYD	0.017223561832586977	3.469446951953614E-18	841	SYNE1	0.015213753232922561	841	SYNE1	0.015213753232922563	1.734723475976807E-18	841	ATP10A	0.01712035610340695	841	ATP10A	0.01712035610340695	0.0	841	SIGLEC10	0.01892863903085368	841	SIGLEC10	0.01892863903085368	0.0	841	FAM78A	0.017482517482517484	841	FAM78A	0.01748251748251748	3.469446951953614E-18
842	CCL20	0.01567152483936687	842	CCL20	0.01567152483936687	0.0	842	ATP6V0E1	0.01722356183258698	842	ATP6V0E1	0.017223561832586977	3.469446951953614E-18	842	PRB4	0.015213753232922561	842	PRB4	0.015213753232922563	1.734723475976807E-18	842	TYMP	0.01712035610340695	842	TYMP	0.01712035610340695	0.0	842	TCTN1	0.01892863903085368	842	TCTN1	0.01892863903085368	0.0	842	ANXA2R	0.017482517482517484	842	ANXA2R	0.01748251748251748	3.469446951953614E-18
843	MORN5	0.01567152483936687	843	MORN5	0.01567152483936687	0.0	843	CFP	0.01722356183258698	843	CFP	0.017223561832586977	3.469446951953614E-18	843	CLEC6A	0.015213753232922561	843	CLEC6A	0.015213753232922563	1.734723475976807E-18	843	PKD2L1	0.01712035610340695	843	PKD2L1	0.01712035610340695	0.0	843	COMMD3	0.01892863903085368	843	COMMD3	0.01892863903085368	0.0	843	CH25H	0.017482517482517484	843	CH25H	0.01748251748251748	3.469446951953614E-18
844	MORN2	0.01567152483936687	844	MORN2	0.01567152483936687	0.0	844	RGS4	0.01722356183258698	844	RGS4	0.017223561832586977	3.469446951953614E-18	844	RIN1	0.015213753232922561	844	RIN1	0.015213753232922563	1.734723475976807E-18	844	SIDT1	0.01712035610340695	844	SIDT1	0.01712035610340695	0.0	844	CSF3R	0.01892863903085368	844	CSF3R	0.01892863903085368	0.0	844	CLEC10A	0.017482517482517484	844	CLEC10A	0.01748251748251748	3.469446951953614E-18
845	RNF187	0.01567152483936687	845	RNF187	0.01567152483936687	0.0	845	HPR	0.01722356183258698	845	HPR	0.017223561832586977	3.469446951953614E-18	845	PDE4DIP	0.015213753232922561	845	PDE4DIP	0.015213753232922563	1.734723475976807E-18	845	FPR2	0.01712035610340695	845	FPR2	0.01712035610340695	0.0	845	GUCY2D	0.01892863903085368	845	GUCY2D	0.01892863903085368	0.0	845	FILIP1L	0.017482517482517484	845	FILIP1L	0.01748251748251748	3.469446951953614E-18
846	RNF181	0.01567152483936687	846	RNF181	0.01567152483936687	0.0	846	CYP8B1	0.01722356183258698	846	CYP8B1	0.017223561832586977	3.469446951953614E-18	846	EMP1	0.015213753232922561	846	EMP1	0.015213753232922563	1.734723475976807E-18	846	FPR3	0.01712035610340695	846	FPR3	0.01712035610340695	0.0	846	CSGALNACT1	0.01892863903085368	846	CSGALNACT1	0.01892863903085368	0.0	846	ZFHX3	0.017482517482517484	846	ZFHX3	0.01748251748251748	3.469446951953614E-18
847	ZBTB20	0.01567152483936687	847	ZBTB20	0.01567152483936687	0.0	847	PROC	0.01722356183258698	847	PROC	0.017223561832586977	3.469446951953614E-18	847	RP2	0.015213753232922561	847	RP2	0.015213753232922563	1.734723475976807E-18	847	TPSB2	0.01712035610340695	847	TPSB2	0.01712035610340695	0.0	847	IFIT1B	0.01892863903085368	847	IFIT1B	0.01892863903085368	0.0	847	MXD1	0.017482517482517484	847	MXD1	0.01748251748251748	3.469446951953614E-18
848	ALPK1	0.01567152483936687	848	ALPK1	0.01567152483936687	0.0	848	CSF1R	0.01722356183258698	848	CSF1R	0.017223561832586977	3.469446951953614E-18	848	TBC1D22A	0.015213753232922561	848	TBC1D22A	0.015213753232922563	1.734723475976807E-18	848	CXCL1	0.01712035610340695	848	CXCL1	0.01712035610340695	0.0	848	ACP2	0.01892863903085368	848	ACP2	0.01892863903085368	0.0	848	NLRP3	0.017482517482517484	848	NLRP3	0.01748251748251748	3.469446951953614E-18
849	DOCK8	0.01567152483936687	849	DOCK8	0.01567152483936687	0.0	849	CCPG1	0.01722356183258698	849	CCPG1	0.017223561832586977	3.469446951953614E-18	849	FRMD4B	0.015213753232922561	849	FRMD4B	0.015213753232922563	1.734723475976807E-18	849	DPF3	0.01712035610340695	849	DPF3	0.01712035610340695	0.0	849	IL1RN	0.01892863903085368	849	IL1RN	0.01892863903085368	0.0	849	BTLA	0.017482517482517484	849	BTLA	0.01748251748251748	3.469446951953614E-18
850	KIFAP3	0.01567152483936687	850	KIFAP3	0.01567152483936687	0.0	850	PTCRA	0.01722356183258698	850	PTCRA	0.017223561832586977	3.469446951953614E-18	850	ZC3H12C	0.015213753232922561	850	ZC3H12C	0.015213753232922563	1.734723475976807E-18	850	IL1A	0.01712035610340695	850	IL1A	0.01712035610340695	0.0	850	CTTN	0.01892863903085368	850	CTTN	0.01892863903085368	0.0	850	TNFSF9	0.017482517482517484	850	TNFSF9	0.01748251748251748	3.469446951953614E-18
851	C2CD2L	0.01567152483936687	851	C2CD2L	0.01567152483936687	0.0	851	ARHGAP31	0.01722356183258698	851	ARHGAP31	0.017223561832586977	3.469446951953614E-18	851	ZC3H12D	0.015213753232922561	851	ZC3H12D	0.015213753232922563	1.734723475976807E-18	851	IMPG2	0.01712035610340695	851	IMPG2	0.01712035610340695	0.0	851	MLKL	0.01892863903085368	851	MLKL	0.01892863903085368	0.0	851	ADAP2	0.017482517482517484	851	ADAP2	0.01748251748251748	3.469446951953614E-18
852	GRIA3	0.01567152483936687	852	GRIA3	0.01567152483936687	0.0	852	CD38	0.01722356183258698	852	CD38	0.017223561832586977	3.469446951953614E-18	852	UBASH3B	0.015213753232922561	852	UBASH3B	0.015213753232922563	1.734723475976807E-18	852	CD180	0.01712035610340695	852	CD180	0.01712035610340695	0.0	852	GRIN3A	0.01892863903085368	852	GRIN3A	0.01892863903085368	0.0	852	LYST	0.017482517482517484	852	LYST	0.01748251748251748	3.469446951953614E-18
853	ADORA3	0.01567152483936687	853	ADORA3	0.01567152483936687	0.0	853	CPPED1	0.01722356183258698	853	CPPED1	0.017223561832586977	3.469446951953614E-18	853	CASP7	0.015213753232922561	853	CASP7	0.015213753232922563	1.734723475976807E-18	853	SLC43A2	0.01712035610340695	853	SLC43A2	0.01712035610340695	0.0	853	FPR1	0.01892863903085368	853	FPR1	0.01892863903085368	0.0	853	LYSMD2	0.017482517482517484	853	LYSMD2	0.01748251748251748	3.469446951953614E-18
854	SLC9A4	0.01567152483936687	854	SLC9A4	0.01567152483936687	0.0	854	HRH2	0.01722356183258698	854	HRH2	0.017223561832586977	3.469446951953614E-18	854	DAPK2	0.015213753232922561	854	DAPK2	0.015213753232922563	1.734723475976807E-18	854	WNT6	0.01712035610340695	854	WNT6	0.01712035610340695	0.0	854	SLC24A4	0.01892863903085368	854	SLC24A4	0.01892863903085368	0.0	854	PNPLA1	0.017482517482517484	854	PNPLA1	0.01748251748251748	3.469446951953614E-18
855	PARP9	0.01567152483936687	855	PARP9	0.01567152483936687	0.0	855	TRIM21	0.01722356183258698	855	TRIM21	0.017223561832586977	3.469446951953614E-18	855	CASP14	0.015213753232922561	855	CASP14	0.015213753232922563	1.734723475976807E-18	855	GNS	0.01712035610340695	855	GNS	0.01712035610340695	0.0	855	KLHDC7B	0.01892863903085368	855	KLHDC7B	0.01892863903085368	0.0	855	CSTA	0.017482517482517484	855	CSTA	0.01748251748251748	3.469446951953614E-18
856	CCR3	0.01567152483936687	856	CCR3	0.01567152483936687	0.0	856	TTC16	0.01722356183258698	856	TTC16	0.017223561832586977	3.469446951953614E-18	856	DYRK4	0.015213753232922561	856	DYRK4	0.015213753232922563	1.734723475976807E-18	856	GPRIN3	0.01712035610340695	856	GPRIN3	0.01712035610340695	0.0	856	C3AR1	0.01892863903085368	856	C3AR1	0.01892863903085368	0.0	856	KAT2B	0.017482517482517484	856	KAT2B	0.01748251748251748	3.469446951953614E-18
857	DDO	0.01567152483936687	857	DDO	0.01567152483936687	0.0	857	PNRC1	0.01722356183258698	857	PNRC1	0.017223561832586977	3.469446951953614E-18	857	KCNJ15	0.015213753232922561	857	KCNJ15	0.015213753232922563	1.734723475976807E-18	857	CARD16	0.01712035610340695	857	CARD16	0.01712035610340695	0.0	857	PDE1C	0.01892863903085368	857	PDE1C	0.01892863903085368	0.0	857	TRIM69	0.017482517482517484	857	TRIM69	0.01748251748251748	3.469446951953614E-18
858	KERA	0.01567152483936687	858	KERA	0.01567152483936687	0.0	858	NDRG1	0.01722356183258698	858	NDRG1	0.017223561832586977	3.469446951953614E-18	858	GLIPR1	0.015213753232922561	858	GLIPR1	0.015213753232922563	1.734723475976807E-18	858	P2RX7	0.01712035610340695	858	P2RX7	0.01712035610340695	0.0	858	RGCC	0.01892863903085368	858	RGCC	0.01892863903085368	0.0	858	LAMP3	0.017482517482517484	858	LAMP3	0.01748251748251748	3.469446951953614E-18
859	IL13RA1	0.01567152483936687	859	IL13RA1	0.01567152483936687	0.0	859	ICOSLG	0.01722356183258698	859	ICOSLG	0.017223561832586977	3.469446951953614E-18	859	GGT1	0.015213753232922561	859	GGT1	0.015213753232922563	1.734723475976807E-18	859	NRROS	0.01712035610340695	859	NRROS	0.01712035610340695	0.0	859	CLSTN2	0.01892863903085368	859	CLSTN2	0.01892863903085368	0.0	859	OMG	0.017482517482517484	859	OMG	0.01748251748251748	3.469446951953614E-18
860	SLC10A3	0.01567152483936687	860	SLC10A3	0.01567152483936687	0.0	860	PPARGC1B	0.01722356183258698	860	PPARGC1B	0.017223561832586977	3.469446951953614E-18	860	MCOLN3	0.015213753232922561	860	MCOLN3	0.015213753232922563	1.734723475976807E-18	860	TIMP1	0.01712035610340695	860	TIMP1	0.01712035610340695	0.0	860	APBB1IP	0.01892863903085368	860	APBB1IP	0.01892863903085368	0.0	860	ITK	0.017482517482517484	860	ITK	0.01748251748251748	3.469446951953614E-18
861	TMEM38B	0.01567152483936687	861	TMEM38B	0.01567152483936687	0.0	861	ADPRH	0.01722356183258698	861	ADPRH	0.017223561832586977	3.469446951953614E-18	861	MCOLN2	0.015213753232922561	861	MCOLN2	0.015213753232922563	1.734723475976807E-18	861	MROH7	0.01712035610340695	861	MROH7	0.01712035610340695	0.0	861	FGFBP1	0.01892863903085368	861	FGFBP1	0.01892863903085368	0.0	861	KY	0.017482517482517484	861	KY	0.01748251748251748	3.469446951953614E-18
862	CEACAM21	0.01567152483936687	862	CEACAM21	0.01567152483936687	0.0	862	C5	0.01722356183258698	862	C5	0.017223561832586977	3.469446951953614E-18	862	HORMAD1	0.015213753232922561	862	HORMAD1	0.015213753232922563	1.734723475976807E-18	862	MROH6	0.01712035610340695	862	MROH6	0.01712035610340695	0.0	862	CDKN2D	0.01892863903085368	862	CDKN2D	0.01892863903085368	0.0	862	NAGPA	0.017482517482517484	862	NAGPA	0.01748251748251748	3.469446951953614E-18
863	FTH1	0.01567152483936687	863	FTH1	0.01567152483936687	0.0	863	LGALS9	0.01722356183258698	863	LGALS9	0.017223561832586977	3.469446951953614E-18	863	BROX	0.015213753232922561	863	BROX	0.015213753232922563	1.734723475976807E-18	863	INPP4B	0.01712035610340695	863	INPP4B	0.01712035610340695	0.0	863	SMG6	0.01892863903085368	863	SMG6	0.01892863903085368	0.0	863	IGIP	0.017482517482517484	863	IGIP	0.01748251748251748	3.469446951953614E-18
864	LGI1	0.01567152483936687	864	LGI1	0.01567152483936687	0.0	864	CD28	0.01722356183258698	864	CD28	0.017223561832586977	3.469446951953614E-18	864	AICDA	0.015213753232922561	864	AICDA	0.015213753232922563	1.734723475976807E-18	864	SEMA7A	0.01712035610340695	864	SEMA7A	0.01712035610340695	0.0	864	FA2H	0.01892863903085368	864	FA2H	0.01892863903085368	0.0	864	USP2	0.017482517482517484	864	USP2	0.01748251748251748	3.469446951953614E-18
865	EDN2	0.01567152483936687	865	EDN2	0.01567152483936687	0.0	865	CALHM2	0.01722356183258698	865	CALHM2	0.017223561832586977	3.469446951953614E-18	865	PLAC8	0.015213753232922561	865	PLAC8	0.015213753232922563	1.734723475976807E-18	865	NIPSNAP3A	0.01712035610340695	865	NIPSNAP3A	0.01712035610340695	0.0	865	ME3	0.01892863903085368	865	ME3	0.01892863903085368	0.0	865	CD244	0.017482517482517484	865	CD244	0.01748251748251748	3.469446951953614E-18
866	PDGFRA	0.01567152483936687	866	PDGFRA	0.01567152483936687	0.0	866	PIGZ	0.01722356183258698	866	PIGZ	0.017223561832586977	3.469446951953614E-18	866	PTPRM	0.015213753232922561	866	PTPRM	0.015213753232922563	1.734723475976807E-18	866	MYD88	0.01712035610340695	866	MYD88	0.01712035610340695	0.0	866	TACSTD2	0.01892863903085368	866	TACSTD2	0.01892863903085368	0.0	866	CD69	0.017482517482517484	866	CD69	0.01748251748251748	3.469446951953614E-18
867	RARRES1	0.01567152483936687	867	RARRES1	0.01567152483936687	0.0	867	C19orf38	0.01722356183258698	867	C19orf38	0.017223561832586977	3.469446951953614E-18	867	MYO7A	0.015213753232922561	867	MYO7A	0.015213753232922563	1.734723475976807E-18	867	DUSP4	0.01712035610340695	867	DUSP4	0.01712035610340695	0.0	867	BST1	0.01892863903085368	867	BST1	0.01892863903085368	0.0	867	PRR5	0.017482517482517484	867	PRR5	0.01748251748251748	3.469446951953614E-18
868	CCDC85B	0.01567152483936687	868	CCDC85B	0.01567152483936687	0.0	868	DLEC1	0.01722356183258698	868	DLEC1	0.017223561832586977	3.469446951953614E-18	868	PTPRH	0.015213753232922561	868	PTPRH	0.015213753232922563	1.734723475976807E-18	868	DUSP1	0.01712035610340695	868	DUSP1	0.01712035610340695	0.0	868	TBC1D30	0.01892863903085368	868	TBC1D30	0.01892863903085368	0.0	868	MFSD1	0.017482517482517484	868	MFSD1	0.01748251748251748	3.469446951953614E-18
869	CCDC85A	0.01567152483936687	869	CCDC85A	0.01567152483936687	0.0	869	PDK4	0.01722356183258698	869	PDK4	0.017223561832586977	3.469446951953614E-18	869	CPM	0.015213753232922561	869	CPM	0.015213753232922563	1.734723475976807E-18	869	LRRC8C	0.01712035610340695	869	LRRC8C	0.01712035610340695	0.0	869	TOR2A	0.01892863903085368	869	TOR2A	0.01892863903085368	0.0	869	MFSD5	0.017482517482517484	869	MFSD5	0.01748251748251748	3.469446951953614E-18
870	IL1RAPL1	0.01567152483936687	870	IL1RAPL1	0.01567152483936687	0.0	870	ARHGAP22	0.01722356183258698	870	ARHGAP22	0.017223561832586977	3.469446951953614E-18	870	CPD	0.015213753232922561	870	CPD	0.015213753232922563	1.734723475976807E-18	870	CTDSP1	0.01712035610340695	870	CTDSP1	0.01712035610340695	0.0	870	PLB1	0.01892863903085368	870	PLB1	0.01892863903085368	0.0	870	CYBB	0.017482517482517484	870	CYBB	0.01748251748251748	3.469446951953614E-18
871	CORO1A	0.01567152483936687	871	CORO1A	0.01567152483936687	0.0	871	CREBRF	0.01722356183258698	871	CREBRF	0.017223561832586977	3.469446951953614E-18	871	IRAK3	0.015213753232922561	871	IRAK3	0.015213753232922563	1.734723475976807E-18	871	XYLB	0.01712035610340695	871	XYLB	0.01712035610340695	0.0	871	TIGD6	0.01892863903085368	871	TIGD6	0.01892863903085368	0.0	871	MTSS1	0.017482517482517484	871	MTSS1	0.01748251748251748	3.469446951953614E-18
872	FAS	0.01567152483936687	872	FAS	0.01567152483936687	0.0	872	TDRD9	0.01722356183258698	872	TDRD9	0.017223561832586977	3.469446951953614E-18	872	WIPI1	0.015213753232922561	872	WIPI1	0.015213753232922563	1.734723475976807E-18	872	PTPRC	0.01712035610340695	872	PTPRC	0.01712035610340695	0.0	872	SGSH	0.01892863903085368	872	SGSH	0.01892863903085368	0.0	872	CRHBP	0.017482517482517484	872	CRHBP	0.01748251748251748	3.469446951953614E-18
873	NPAS3	0.01567152483936687	873	NPAS3	0.01567152483936687	0.0	873	ADAM9	0.01722356183258698	873	ADAM9	0.017223561832586977	3.469446951953614E-18	873	F3	0.015213753232922561	873	F3	0.015213753232922563	1.734723475976807E-18	873	TYK2	0.01712035610340695	873	TYK2	0.01712035610340695	0.0	873	IL1B	0.01892863903085368	873	IL1B	0.01892863903085368	0.0	873	CMTM1	0.017482517482517484	873	CMTM1	0.01748251748251748	3.469446951953614E-18
874	TRIM9	0.01567152483936687	874	TRIM9	0.01567152483936687	0.0	874	TRIM38	0.01722356183258698	874	TRIM38	0.017223561832586977	3.469446951953614E-18	874	ABLIM3	0.015213753232922561	874	ABLIM3	0.015213753232922563	1.734723475976807E-18	874	DUSP23	0.01712035610340695	874	DUSP23	0.01712035610340695	0.0	874	GLRA1	0.01892863903085368	874	GLRA1	0.01892863903085368	0.0	874	CLEC4E	0.017482517482517484	874	CLEC4E	0.01748251748251748	3.469446951953614E-18
875	KRT10	0.01567152483936687	875	KRT10	0.01567152483936687	0.0	875	RASSF2	0.01722356183258698	875	RASSF2	0.017223561832586977	3.469446951953614E-18	875	POU2AF1	0.015213753232922561	875	POU2AF1	0.015213753232922563	1.734723475976807E-18	875	MYO18A	0.01712035610340695	875	MYO18A	0.01712035610340695	0.0	875	TYMP	0.01892863903085368	875	TYMP	0.01892863903085368	0.0	875	CYP2W1	0.017482517482517484	875	CYP2W1	0.01748251748251748	3.469446951953614E-18
876	TMBIM6	0.01567152483936687	876	TMBIM6	0.01567152483936687	0.0	876	IL1R1	0.01722356183258698	876	IL1R1	0.017223561832586977	3.469446951953614E-18	876	ENDOU	0.015213753232922561	876	ENDOU	0.015213753232922563	1.734723475976807E-18	876	FAM151A	0.01712035610340695	876	FAM151A	0.01712035610340695	0.0	876	FPR2	0.01892863903085368	876	FPR2	0.01892863903085368	0.0	876	RAPGEF1	0.017482517482517484	876	RAPGEF1	0.01748251748251748	3.469446951953614E-18
877	TMBIM4	0.01567152483936687	877	TMBIM4	0.01567152483936687	0.0	877	CHD3	0.01722356183258698	877	CHD3	0.017223561832586977	3.469446951953614E-18	877	TNFSF13	0.015213753232922561	877	TNFSF13	0.015213753232922563	1.734723475976807E-18	877	BLK	0.01712035610340695	877	BLK	0.01712035610340695	0.0	877	PID1	0.01892863903085368	877	PID1	0.01892863903085368	0.0	877	HLA-DPB1	0.017482517482517484	877	HLA-DPB1	0.01748251748251748	3.469446951953614E-18
878	IL15RA	0.01567152483936687	878	IL15RA	0.01567152483936687	0.0	878	ABHD15	0.01722356183258698	878	ABHD15	0.017223561832586977	3.469446951953614E-18	878	RASL10A	0.015213753232922561	878	RASL10A	0.015213753232922563	1.734723475976807E-18	878	HTRA4	0.01712035610340695	878	HTRA4	0.01712035610340695	0.0	878	CXCL1	0.01892863903085368	878	CXCL1	0.01892863903085368	0.0	878	EXTL1	0.017482517482517484	878	EXTL1	0.01748251748251748	3.469446951953614E-18
879	CASP8	0.01567152483936687	879	CASP8	0.01567152483936687	0.0	879	PLSCR1	0.01722356183258698	879	PLSCR1	0.017223561832586977	3.469446951953614E-18	879	TNFSF15	0.015213753232922561	879	TNFSF15	0.015213753232922563	1.734723475976807E-18	879	SPSB1	0.01712035610340695	879	SPSB1	0.01712035610340695	0.0	879	TMEM200C	0.01892863903085368	879	TMEM200C	0.01892863903085368	0.0	879	MAN1A1	0.017482517482517484	879	MAN1A1	0.01748251748251748	3.469446951953614E-18
880	PURA	0.01567152483936687	880	PURA	0.01567152483936687	0.0	880	CD302	0.01722356183258698	880	CD302	0.017223561832586977	3.469446951953614E-18	880	GPR18	0.015213753232922561	880	GPR18	0.015213753232922563	1.734723475976807E-18	880	P2RY11	0.01712035610340695	880	P2RY11	0.01712035610340695	0.0	880	STK40	0.01892863903085368	880	STK40	0.01892863903085368	0.0	880	METTL1	0.017482517482517484	880	METTL1	0.01748251748251748	3.469446951953614E-18
881	OLAH	0.01567152483936687	881	OLAH	0.01567152483936687	0.0	881	HP	0.01722356183258698	881	HP	0.017223561832586977	3.469446951953614E-18	881	IFIT3	0.015213753232922561	881	IFIT3	0.015213753232922563	1.734723475976807E-18	881	WDR81	0.01712035610340695	881	WDR81	0.01712035610340695	0.0	881	ABCA13	0.01892863903085368	881	ABCA13	0.01892863903085368	0.0	881	LRTM2	0.017482517482517484	881	LRTM2	0.01748251748251748	3.469446951953614E-18
882	MAN2B2	0.01567152483936687	882	MAN2B2	0.01567152483936687	0.0	882	C15orf48	0.01722356183258698	882	C15orf48	0.017223561832586977	3.469446951953614E-18	882	IFIT2	0.015213753232922561	882	IFIT2	0.015213753232922563	1.734723475976807E-18	882	PEA15	0.01712035610340695	882	PEA15	0.01712035610340695	0.0	882	DPF3	0.01892863903085368	882	DPF3	0.01892863903085368	0.0	882	FCAMR	0.017482517482517484	882	FCAMR	0.01748251748251748	3.469446951953614E-18
883	PLK3	0.01567152483936687	883	PLK3	0.01567152483936687	0.0	883	RAPSN	0.01722356183258698	883	RAPSN	0.017223561832586977	3.469446951953614E-18	883	RWDD2B	0.015213753232922561	883	RWDD2B	0.015213753232922563	1.734723475976807E-18	883	MYBPC1	0.01712035610340695	883	MYBPC1	0.01712035610340695	0.0	883	IL1A	0.01892863903085368	883	IL1A	0.01892863903085368	0.0	883	ITGA11	0.017482517482517484	883	ITGA11	0.01748251748251748	3.469446951953614E-18
884	CIB1	0.01567152483936687	884	CIB1	0.01567152483936687	0.0	884	ACOT11	0.01722356183258698	884	ACOT11	0.017223561832586977	3.469446951953614E-18	884	HTR3B	0.015213753232922561	884	HTR3B	0.015213753232922563	1.734723475976807E-18	884	PLEKHO2	0.01712035610340695	884	PLEKHO2	0.01712035610340695	0.0	884	RABEP2	0.01892863903085368	884	RABEP2	0.01892863903085368	0.0	884	B9D2	0.017482517482517484	884	B9D2	0.01748251748251748	3.469446951953614E-18
885	PKD1L1	0.01567152483936687	885	PKD1L1	0.01567152483936687	0.0	885	SH3KBP1	0.01722356183258698	885	SH3KBP1	0.017223561832586977	3.469446951953614E-18	885	CLEC4A	0.015213753232922561	885	CLEC4A	0.015213753232922563	1.734723475976807E-18	885	ARSD	0.01712035610340695	885	ARSD	0.01712035610340695	0.0	885	PPCDC	0.01892863903085368	885	PPCDC	0.01892863903085368	0.0	885	SUMF1	0.017482517482517484	885	SUMF1	0.01748251748251748	3.469446951953614E-18
886	FSTL5	0.01567152483936687	886	FSTL5	0.01567152483936687	0.0	886	SIGLEC10	0.01722356183258698	886	SIGLEC10	0.017223561832586977	3.469446951953614E-18	886	CASP5	0.015213753232922561	886	CASP5	0.015213753232922563	1.734723475976807E-18	886	ARHGEF3	0.01712035610340695	886	ARHGEF3	0.01712035610340695	0.0	886	MAST4	0.01892863903085368	886	MAST4	0.01892863903085368	0.0	886	THEMIS2	0.017482517482517484	886	THEMIS2	0.01748251748251748	3.469446951953614E-18
[truncated: 2,446 more rows]
