# Supplementary material for: A Core Transcription Regulatory Circuitry Defining Microglia Cell Identity Inferred from the Reanalysis of Multiple Human Microglia Differentiation Protocols
Source: Brain Sci. 2021 Oct 11;11(10):1338. doi: 10.3390/brainsci11101338 (PMC8533937; doi:10.3390/brainsci11101338)
Supplement: Supplementary file 1 [file brainsci-11-01338-s001.zip › Supplementary_Table_1_Datasets.xlsx]

## Sheet: Feuil1
Article	Name	Name in Data base	GSM Number
Abud et al (2017)	IPSC_Abud	iPS10203 iPS6160 iPS7022 iPS7028	GSM2360261 GSM2360262 GSM2360263 GSM2360264
Abud et al (2017)	iHPC_Abud	HPCCDI iHPC10318 iHPC7028	GSM2360258 GSM2360259 GSM2360260
Abud et al (2017)	iMGL_Abud	10318X2 7028X2 x2-1 x2-2 x2-3 x2-4	GSM2360252 GSM2360253 GSM2360254 GSM2360255 GSM2360256 GSM2360257
Abud et al (2017)	Fetal_MGL_Abud	A2 A3 A7	GSM2360274 GSM2360275 GSM2360276
Abud et al (2017)	Adult_MGL_Abud	A15 A16 A18	GSM2360277 GSM2360278 GSM2360279
Abud et al (2017)	CD14 Monocyte_Abud	M-1 M-2 M-3 M-4 M-5	GSM2360265 GSM2360266 GSM2360267 GSM2360268 GSM2360269
Abud et al (2017)	CD16 Monocyte _Abud	IM-1 IM-2 IM-3 IM-4	GSM2360270 GSM2360271 GSM2360272 GSM2360273
Abud et al (2017)	Blood DC_Abud	S8 S22 S25	GSM2360280 GSM2360281 GSM2360282
McQuade et al (2018)	iHPC_Mcquade_1	IPS-HPC2.0_7028_1 IPS-HPC2.0_7028_2 IPS-HPC2.0_7028_3 IPS-HPC2.0_EGFP_1	GSM3465676 GSM3465677 GSM3465678 GSM3465679
McQuade et al (2018)	iHPC_McQuade_2	IPS-HPC2.0_EGFP_1 IPS-HPC2.0_EGFP_2 IPS-HPC2.0_EGFP_3	GSM3465679 GSM3465680 GSM3465681
McQuade et al (2018)	iHPC_McQuade_3	IPS-HPC2.0_ADRC5_ IPS-HPC2.0_ADRC5_2 IPS-HPC2.0_ADRC5_3	1GSM3465682 GSM3465683 GSM3465684
McQuade et al (2018)	iMGL_McQuade_Abud	iPS-microglia 1 iPS-microglia 2 iPS-microglia 3	GSM3309916 GSM3309917 GSM3309918
McQuade et al (2018)	iMGL_McQuade_1	iPS-microglia2.0 no sorting 1 iPS-microglia2.0 no sorting 2 iPS-microglia2.0 no sorting 3	GSM3309919 GSM3309920 GSM3309921
McQuade et al (2018)	iMGL_McQuade_2	iPS-microglia_2.0_ADRC75_1 iPS-microglia_2.0_ADRC75_2 iPS-microglia_2.0_ADRC75_3	GSM3465685 GSM3465686 GSM3465687
McQuade et al (2018)	iMGL_McQuade_3	iPS-microglia_2.0_ADRC76_1 iPS-microglia_2.0_ADRC76_2 iPS-microglia_2.0_ADRC76_3	GSM3465688 GSM3465689 GSM3465690
McQuade et al (2018)	iMGL_McQuade_4	iPS-microglia_2.0_ADRC77_1 iPS-microglia_2.0_ADRC77_2 iPS-microglia_2.0_ADRC77_3	GSM3465691 GSM3465692 GSM3465693
McQuade et al (2018)	iMGL_McQuade_5	iPS-microglia_2.0_H9_1 iPS-microglia_2.0_H9_2 iPS-microglia_2.0_H9_3	GSM3465694 GSM3465695 GSM3465696
Muffat et al (2016)	iMGL_Muffat	pMGL1 pMGL2 pMGL3.1 pMGL3.2 pMGL4 pMGL5	GSM2285365 GSM2285366 GSM2285367 GSM2285368 GSM2285369 GSM2285370
Muffat et al (2016)	Fetal_MGL_Muffat	FMG1 FMG2	GSM2285362 GSM2285363
Muffat et al (2016)	NPC_Muffat	NPC1 NPC2 NPC3 NPC4	GSM2285374 GSM2285375 GSM2285376 GSM2285377
Douvaras et al (2017)	iMGL_Douvaras_1	iPSC1-derived microglia rep.1 iPSC1-derived microglia rep.2	GSM2576759 GSM2576761
Douvaras et al (2017)	iMGL_Douvaras_2	iPSC2-derived microglia rep.1 iPSC2-derived microglia rep.2	GSM2576762 GSM2576764
Douvaras et al (2017)	iMGL_Douvaras_3	iPSC3-derived microglia rep.1 iPSC3-derived microglia rep.2	GSM2576765 GSM2576766
Douvaras et al (2017)	Fetal_MGL_Douvaras	Human primary microgliaSerum Free rep.1 Human primary microglia Serum Free rep.2	GSM2576771 GSM2576772
Chen et al (2021)	IPSC_ Chen	N2-iPSC-rep1 N2-iPSC-rep2	GSM4994458 GSM4994459
Chen et al (2021)	iMGL_Chen_1	N1-iMG-rep1 N1-iMG-rep2 N1-iMG-rep3	GSM4994452 GSM4994453 GSM4994454
Chen et al (2021)	iMGL_Chen_2	N2-iMG-rep1 N2-iMG-rep2 N2-iMG-rep3	GSM4994455 GSM4994456 GSM4994457
Chen et al (2021)	Neuron_Chen	N2-iN-rep1 N2-iN-rep2	GSM4994460 GSM4994461
Trudler et al (2021)	iMGL_Trudler	hiPSC-derived microglia rep1 hiPSC-derived microglia rep2	GSM5175989 GSM5175990
Trudler et al (2021)	Fetal_Microglia_Trudler	Human primary microgliaSerum Free rep.1 Human primary microglia Serum Free rep.2	GSM5175993 GSM5175994
Trudler et al (2021)	IPSC_Trudler	hiPSC rep 1 hiPSC rep 2	GSM5175991 GSM5175992
